# Supplementary material for: Sidechain structure–activity relationships of cyclobutane-based small molecule αvβ3 antagonists
Source: Royal Society of Chemistry journal article supplement (doi:10.1039/d4md00306c), 2024-01-01
Supplement: d4md00306c2.pdf [file d4md00306c2.pdf]

**Supplementary data: spectra**

**Section 1  $^1\text{H}$  and  $^{13}\text{C}$  NMR spectra of novel compounds. Pages 2-106**

**Section 2: HRMS data of novel compounds. Pages 107 onwards**

**(Mesitylsulfonyl)-L-glutamine [Compound 4]**

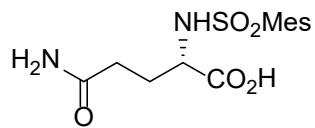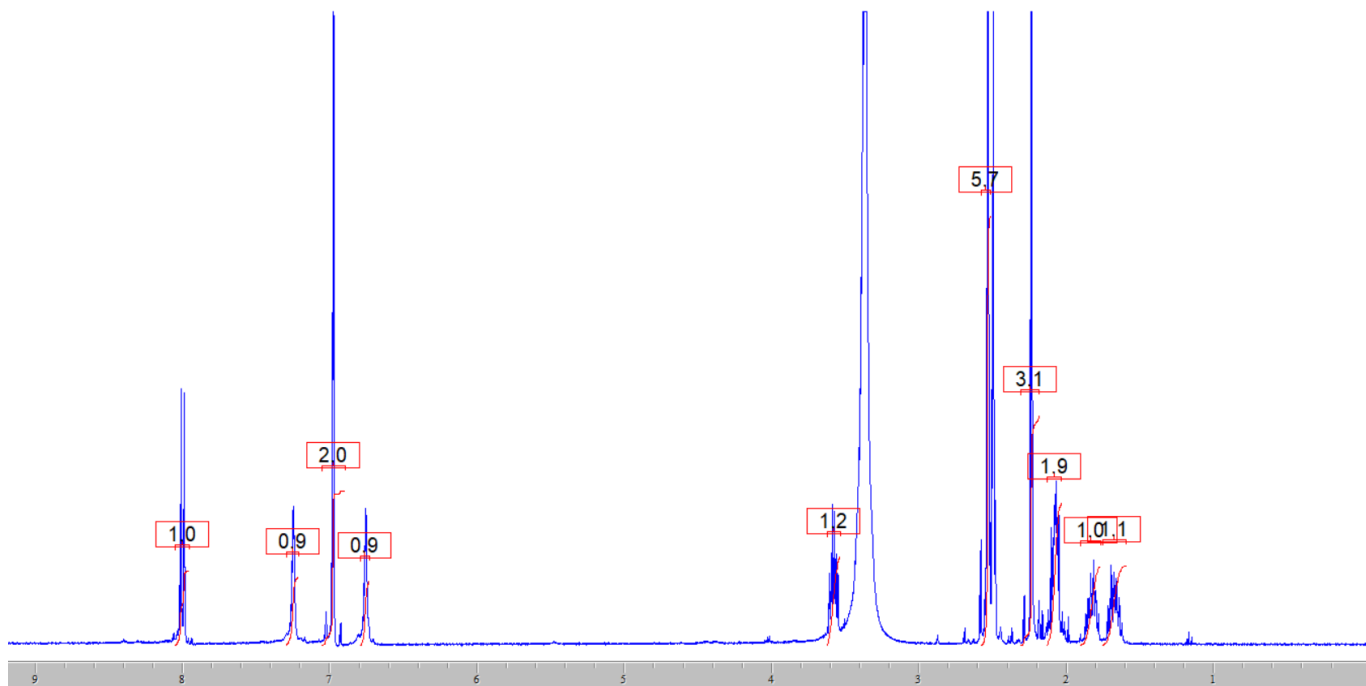

aet9-11

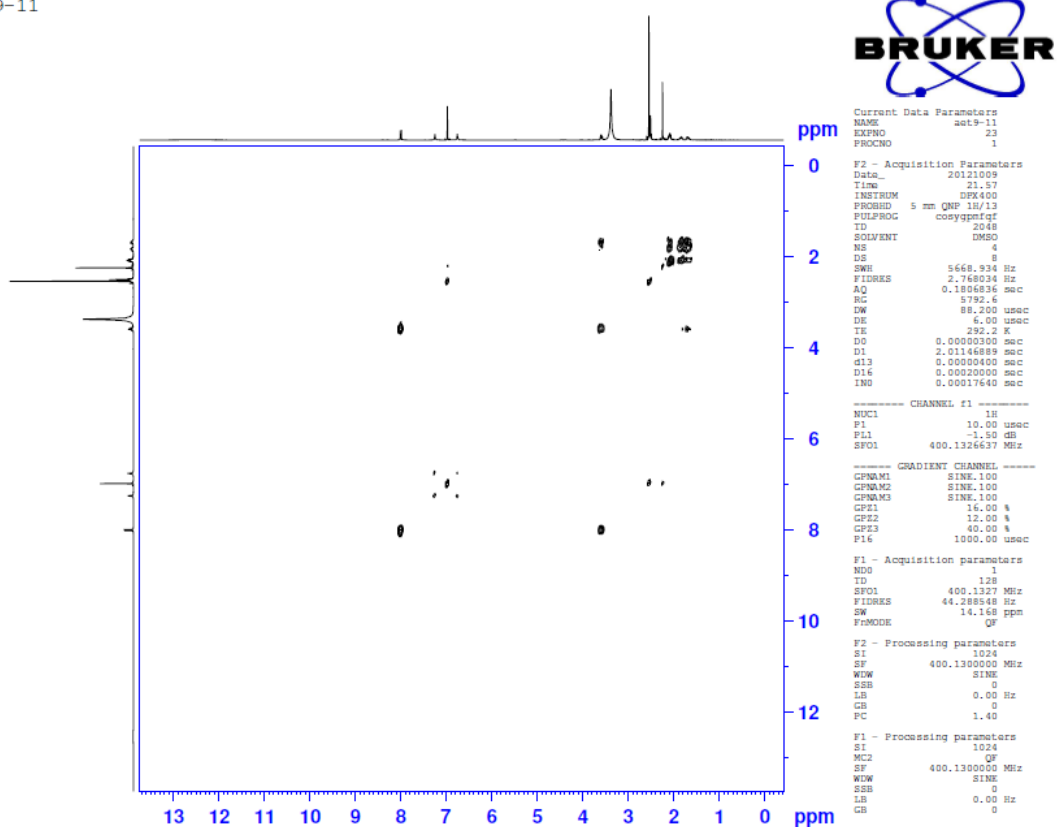

aet9-11

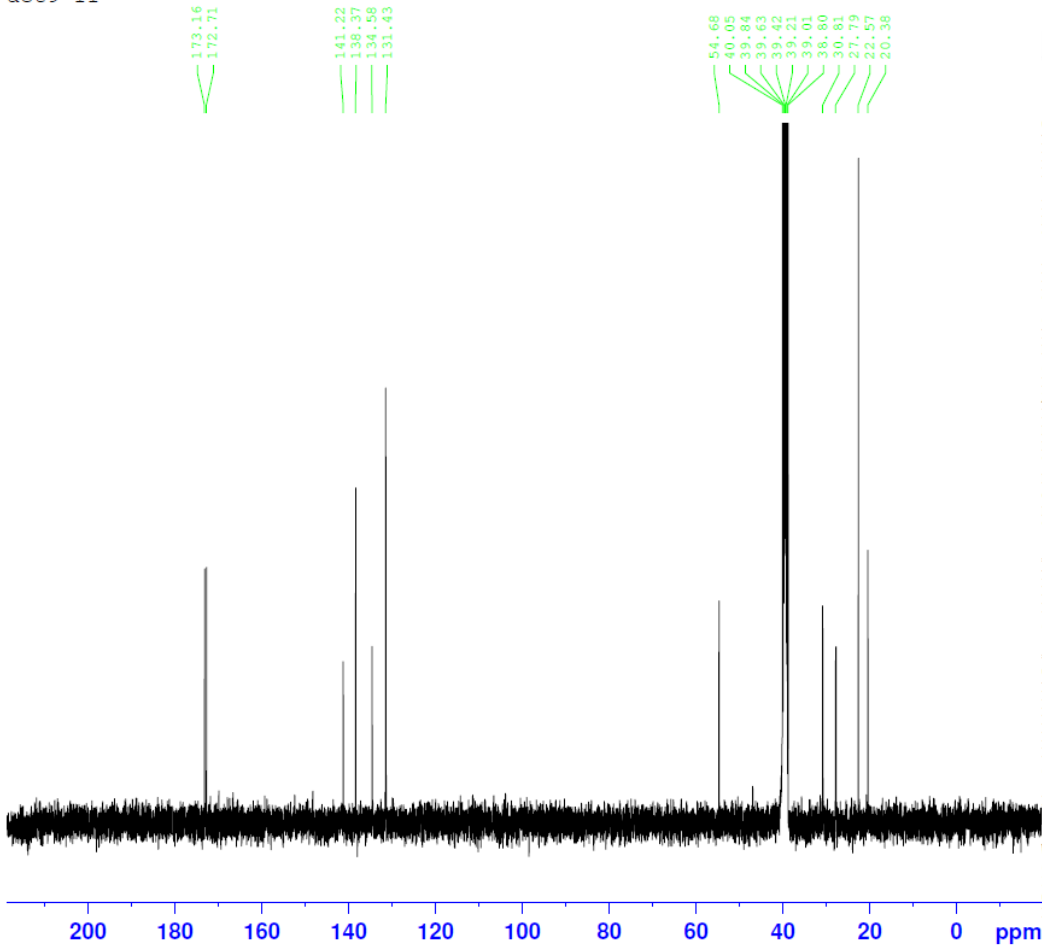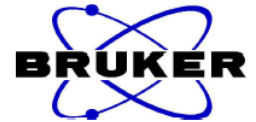

```

Current Data Parameters
NAME          aet9-11
EXPNO         21
PROCNO        1

F2 - Acquisition Parameters
Date_         20121009
Time          21.26
INSTRUM       DPX400
PROBHD        5 mm QNP 1H/13
PULPROG       zgpg30
TD            65536
SOLVENT       DMSO
NS            1024
DS            4
SWH           23980.814 Hz
FIDRES        0.365918 Hz
AQ            1.3664756 sec
RG            1290.2
DW            20.850 usec
DE            6.00 usec
TE            293.2 K
D1            2.00000000 sec
d11           0.03000000 sec
DELTA         1.89999998 sec
TD0           1

===== CHANNEL f1 =====
NUC1          13C
P1            8.50 usec
PL1           -2.60 dB
SFO1          100.6228298 MHz

===== CHANNEL f2 =====
CPDPRG2       waltz16
NUC2          1H
PCPD2         80.00 usec
PL2           -1.50 dB
PL12          17.50 dB
PL13          17.50 dB
SFO2          400.1316005 MHz

F2 - Processing parameters
SI            32768
SF            100.6128193 MHz
WDW           EM
SSB           0
LB            1.00 Hz
GB            0
PC            1.40
  
```

aet9-11

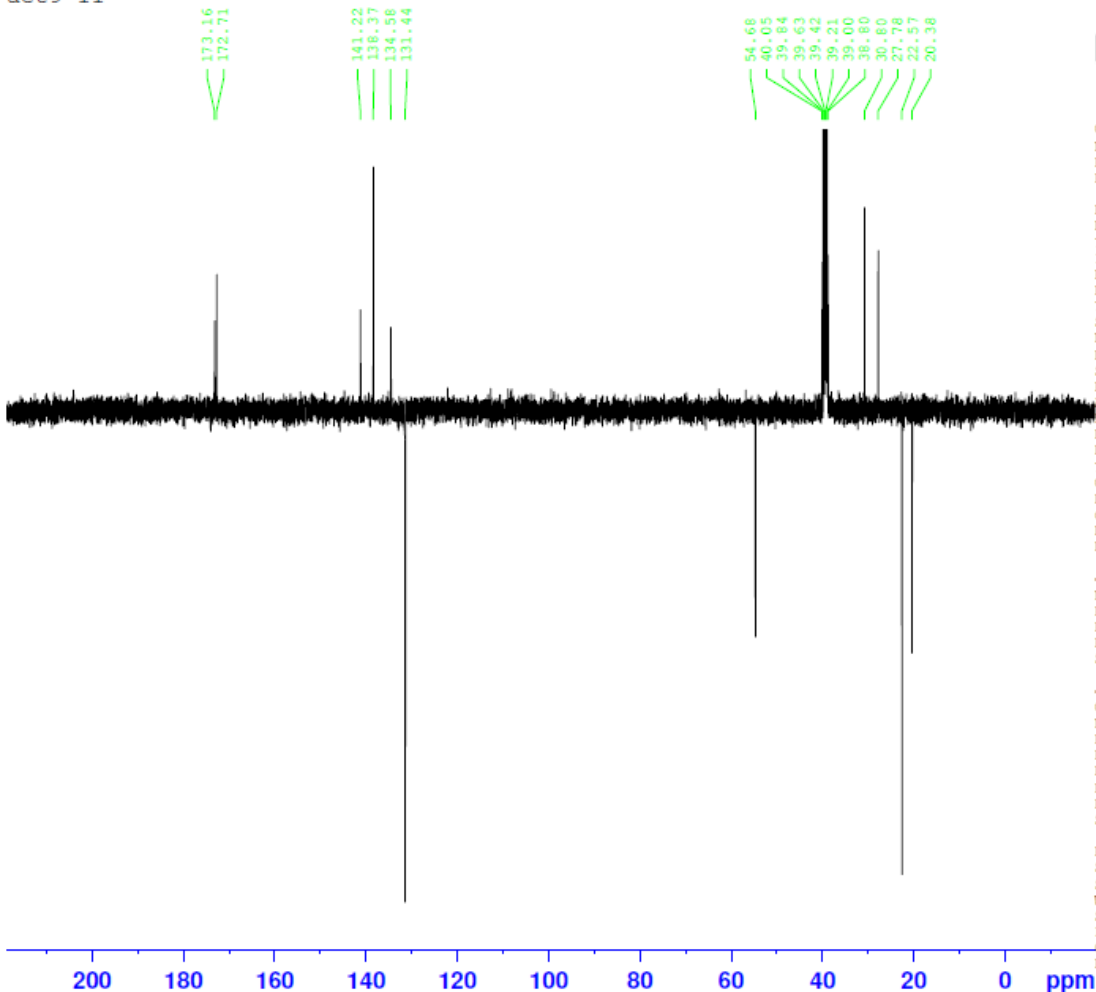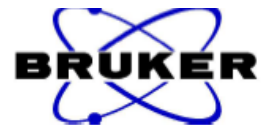

```

Current Data Parameters
NAME          aet9-11
EXPNO         22
PROCNO        1

F2 - Acquisition Parameters
Date_         20121009
Time          21.57
INSTRUM       DPX400
PROBHD        5 mm QNP 1H/13
PULPROG       deptg_135
TD            65536
SOLVENT       DMSO
NS            512
DS            4
SWH           23980.814 Hz
FIDRES        0.365918 Hz
AQ            1.3664756 sec
RG            11585.2
DW            20.850 usec
DE            6.00 usec
TE            292.2 K
CNSI2         145.0000000
D1            2.00000000 sec
d2            0.00344828 sec
D11           0.03000000 sec
DELTA         0.00001082 sec

===== CHANNEL f1 =====
NUC1          13C
P1            8.50 usec
P2            17.00 usec
PL1           -2.60 dB
SFO1          100.6228300 MHz

===== CHANNEL f2 =====
CPDPRG2       waltz16
NUC2          1H
P3            10.00 usec
P4            20.00 usec
PCPD2         80.00 usec
PL2           -1.50 dB
PL12          17.50 dB
SFO2          400.1316000 MHz

F2 - Processing parameters
SI            32768
SF            100.6128193 MHz
WDW           EM
SSB           0
LB            1.00 Hz
GB            0
PC            1.40
  
```

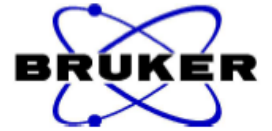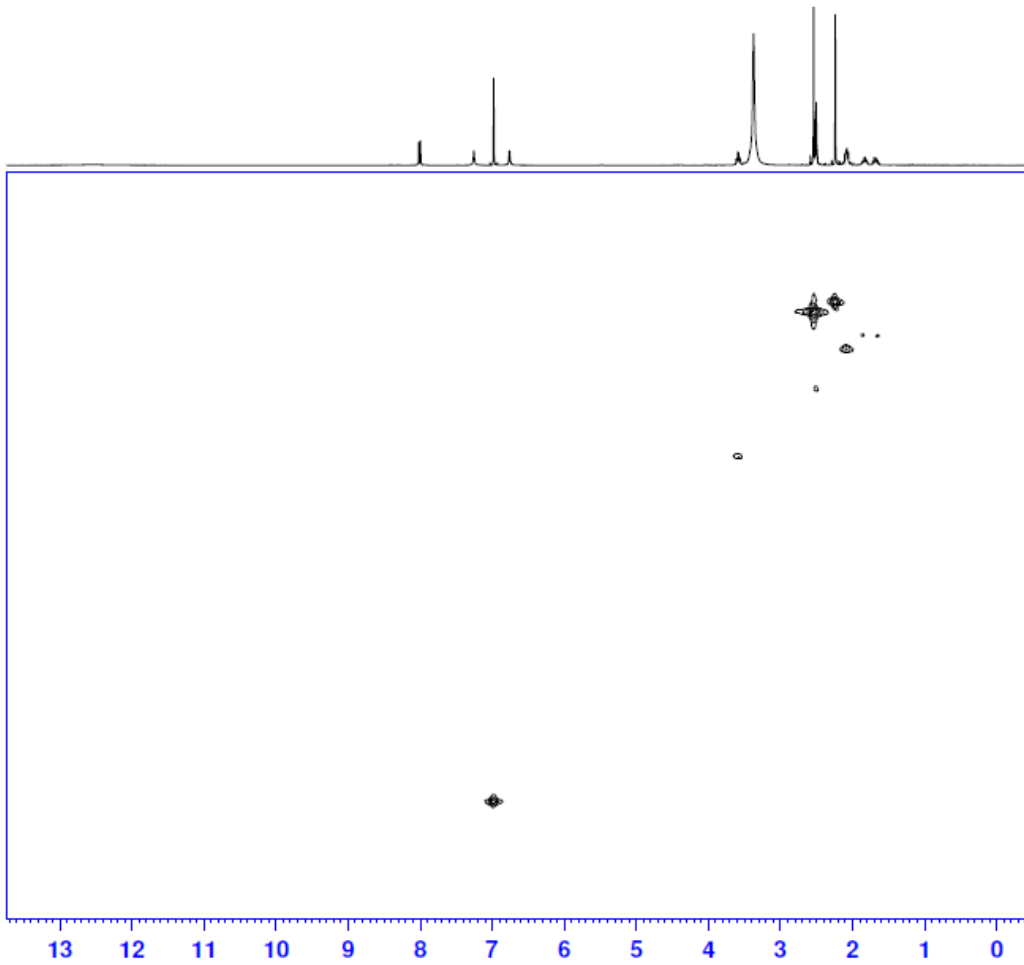

Current Data Parameters  
 NAME aet9-11  
 EXPNO 24  
 PROCNO 1

F2 - Acquisition Parameters  
 Date\_ 20121003  
 Time 22.17  
 INSTRUM spect  
 PULPROG zgpg30  
 ID 1024  
 SOLVENT dmsc  
 NS 4  
 DS 16  
 SWH 5669.934 Hz  
 FIDRES 5.536068 Hz  
 AQ 0.0903665 sec  
 RG 24000  
 DW 88.200 usec  
 DE 6.00 usec  
 TK 292.2 K  
 CNST2 145.0000000  
 d0 0.0000000 sec  
 d1 1.53696404 sec  
 d2 0.00344828 sec  
 d12 0.00000000 sec  
 d13 0.00000400 sec  
 d16 0.00200000 sec  
 DELTA1 0.00222428 sec  
 IN0 0.00000000 sec

----- CHANNEL f1 -----  
 NUC1 1H  
 P1 10.00 usec  
 PL1 20.00 dB  
 PL12 -1.50 dB  
 SFO1 400.1326637 MHz

----- CHANNEL f2 -----  
 CPDPRG2 zgpg30  
 NUC2 13C  
 P3 8.00 usec  
 PL3 74.00 dB  
 PL12 -3.00 dB  
 PL122 -18.00 dB  
 SFO2 100.6203140 MHz

----- GRADIENT CHANNEL -----  
 GPRAM1 SINE.100  
 GPRAM2 SINE.100  
 GPRAM3 SINE.100  
 GPE1 50.00 %  
 GPE2 30.00 %  
 GPE3 40.10 %  
 P16 1000.00 usec

F1 - Acquisition parameters  
 NS0 2  
 ID 128  
 SFO1 100.6203 MHz  
 FIDRES 130.208328 Hz  
 SW 165.639 ppm  
 PrMODEK QF

F2 - Processing parameters  
 SI 1024  
 SF 400.1300000 MHz  
 MSW QSINE  
 SSR 2  
 LB 0.00 Hz  
 GB 0  
 PC 1.40

F1 - Processing parameters  
 SI 1024  
 SF 100.6127690 MHz  
 MSW QSINE  
 SSR 2  
 LB 0.00 Hz  
 GB 0



**(S)-4-Amino-2-(phenylsulfonamido)butanoic acid 5**

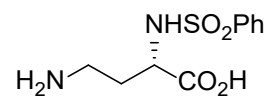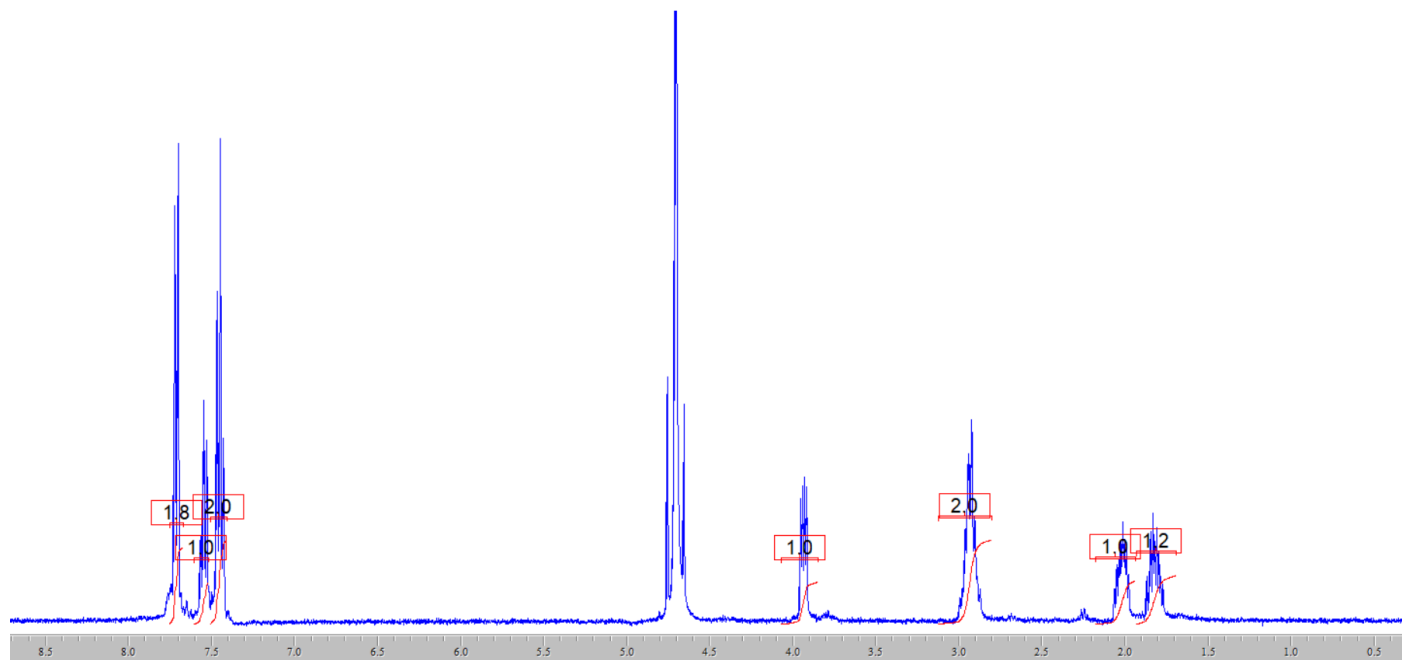

aet9-9 1 drop TFA  
aet9-9 (1 drop TFA)

173.19

137.89  
133.73  
129.36  
126.72

53.33

36.08

29.60

$^{13}\text{C}$  NMR (101 MHz,  $\text{D}_2\text{O}$ )  $\delta$  173.19 (C), 137.89 (C), 133.73 (CH), 129.36 (CH), 126.72 (CH), 53.33 (CH),  
36.08 ( $\text{CH}_2$ ), 29.60 ( $\text{CH}_2$ );

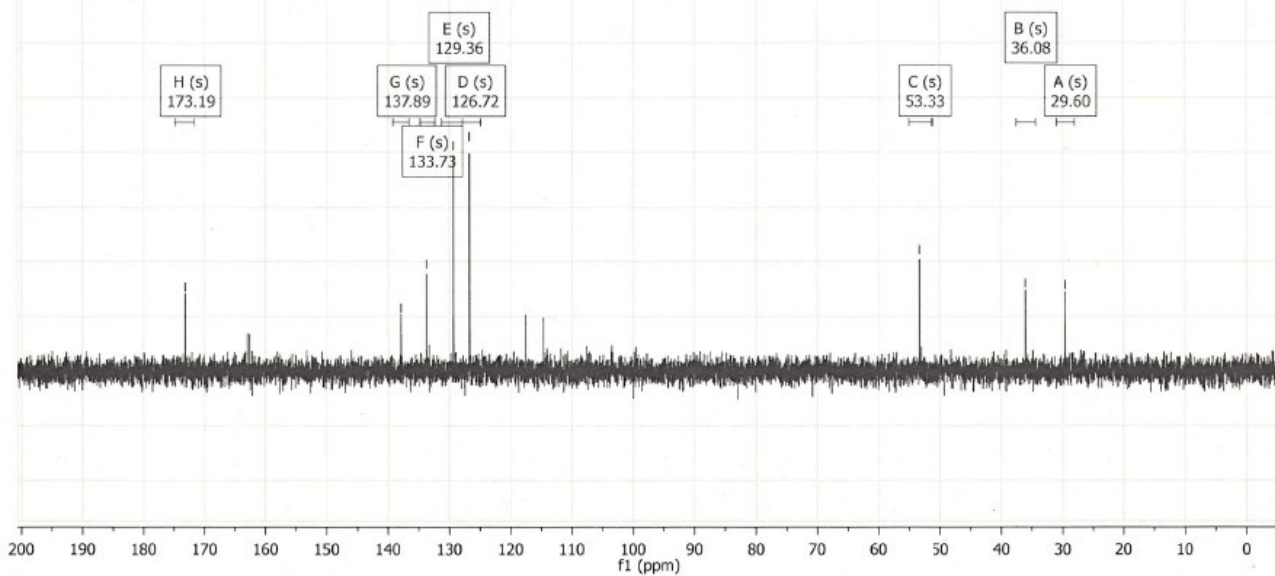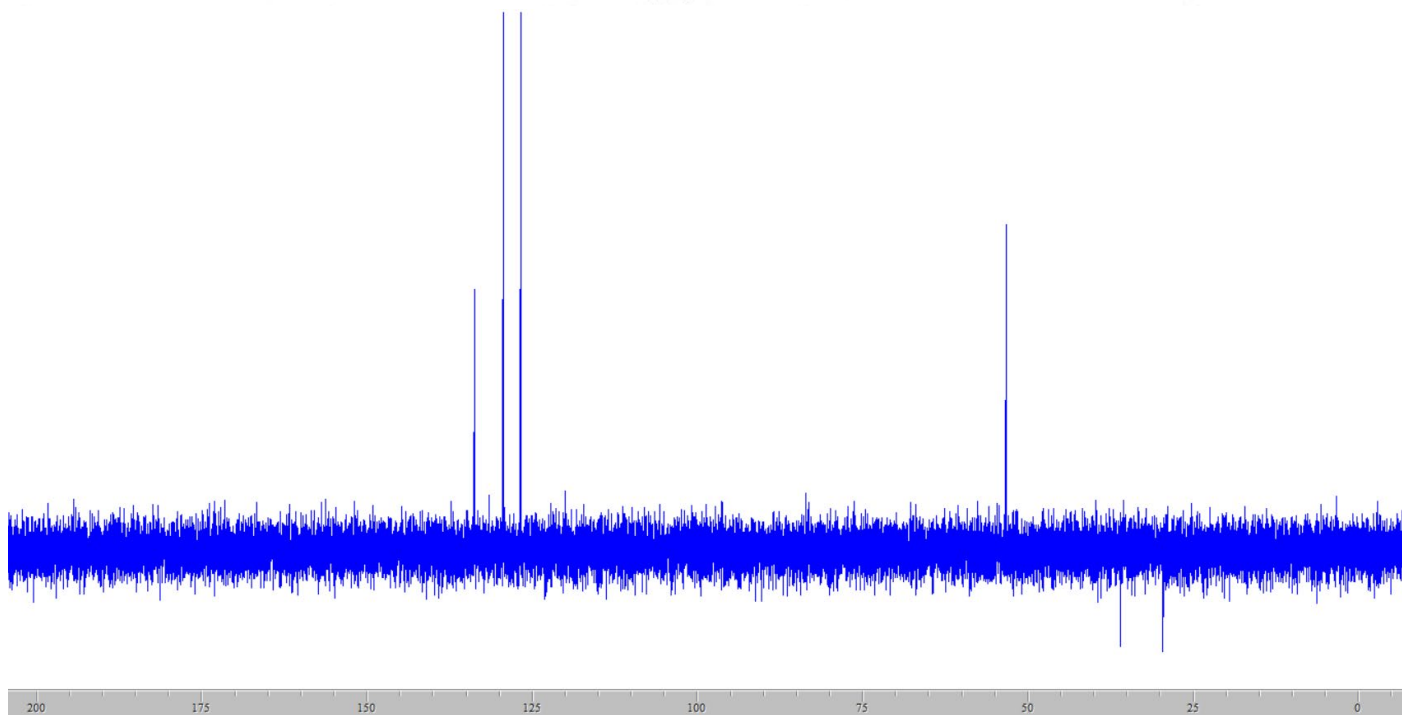

**(S)-4-Amino-2-(2,4,6-trimethylphenylsulfonamido)butanoic acid [Compound 6]:**

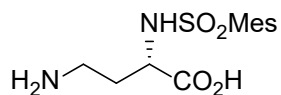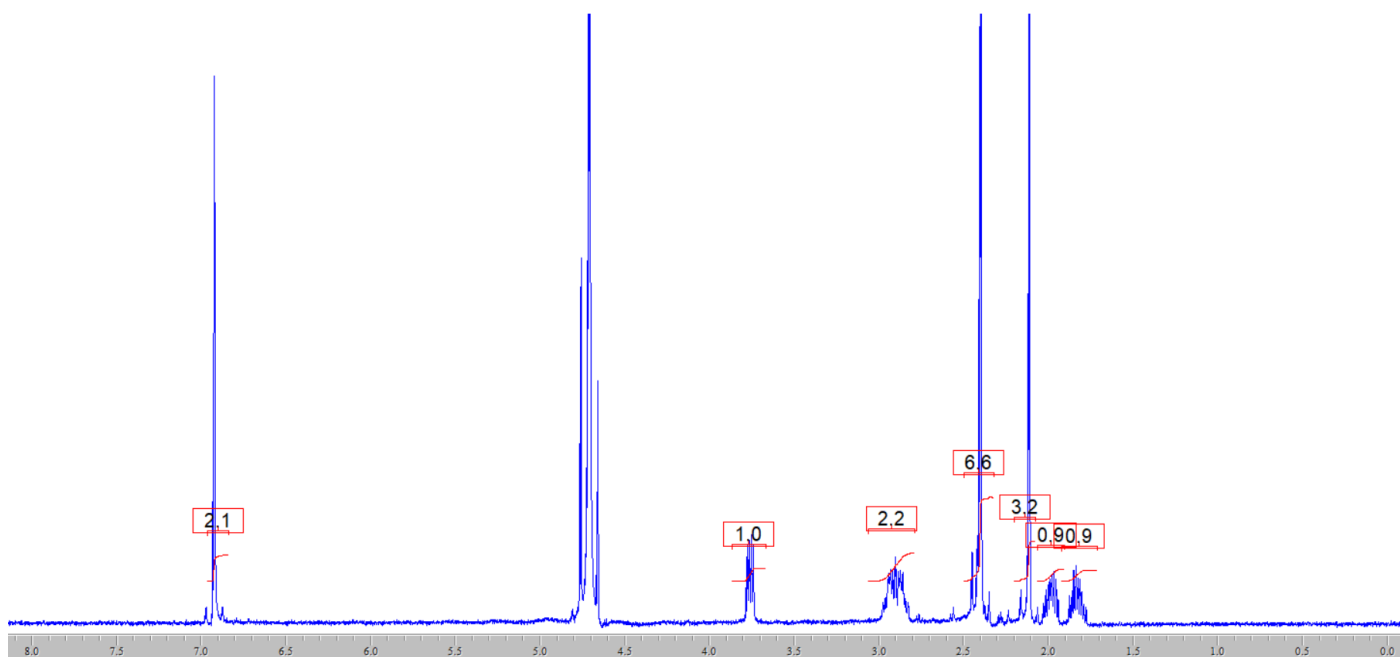

aet9-13

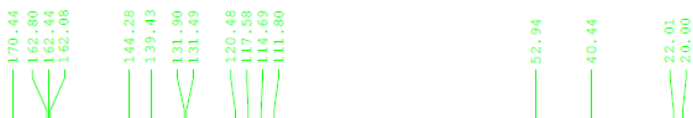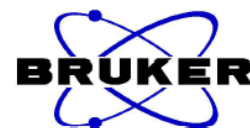

Current Data Parameters  
 NAME aet9-13  
 EXPNO 10  
 PROCNO 1

F2 - Acquisition Parameters  
 Date\_ 20130102  
 Time 13.04  
 INSTRUM DPX400  
 PROBHD 5 mm QNP 1H/13  
 PULPROG zgpg30  
 TD 65536  
 SOLVENT D2O  
 NS 1024  
 DS 4  
 SWH 23980.814 Hz  
 FIDRES 0.365918 Hz  
 AQ 1.3664756 sec  
 RG 2580.3  
 DW 20.850 usec  
 DE 6.00 usec  
 TE 298.2 K  
 D1 2.00000000 sec  
 d11 0.03000000 sec  
 DELTA 1.89999998 sec  
 TD0 1

===== CHANNEL f1 =====  
 NUC1 13C  
 P1 8.50 usec  
 PL1 -2.60 dB  
 SFO1 100.6228298 MHz

===== CHANNEL f2 =====  
 CPDPRG2 waltz16  
 NUC2 1H  
 PCPD2 80.00 usec  
 PL2 -1.50 dB  
 PL12 17.50 dB  
 PL13 17.50 dB  
 SFO2 400.1316005 MHz

F2 - Processing parameters  
 SI 32768  
 SF 100.6127690 MHz  
 WDW EM  
 SSB 0  
 LB 1.00 Hz  
 GB 0  
 PC 1.40

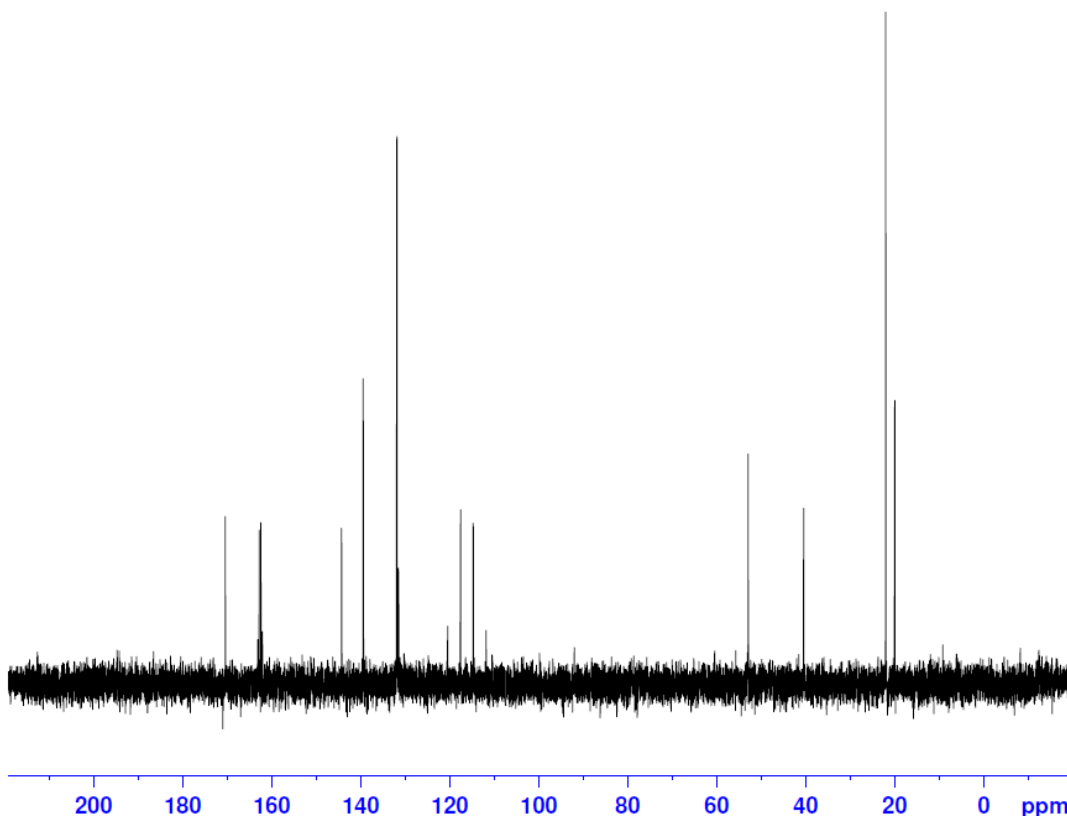

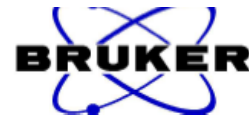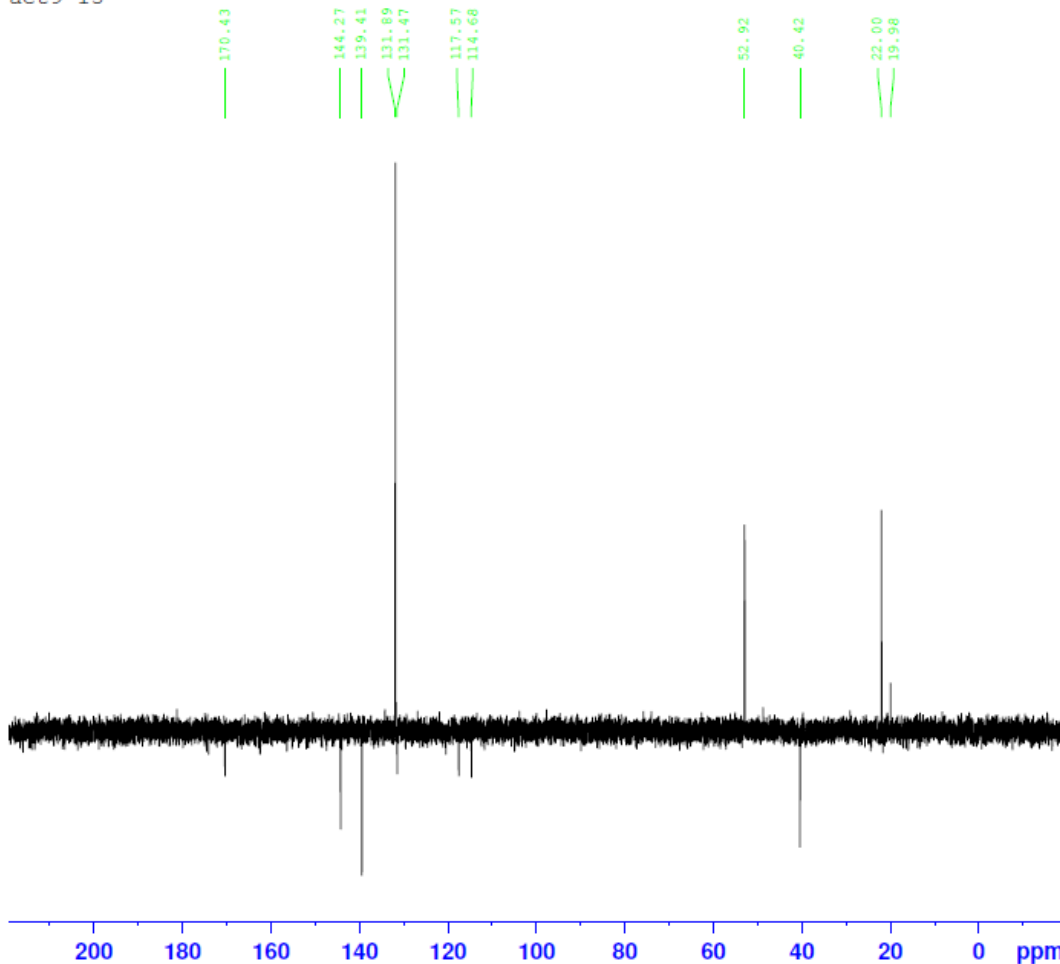

Current Data Parameters  
 NAME act9-13  
 EXPNO 11  
 PROCNO 1

F2 - Acquisition Parameters  
 Date\_ 20130102  
 Time\_ 13.34  
 INSTRUM DPX400  
 PROBHD 5 mm QNP 1H/13  
 PULPROG deptg\_135  
 ID 65536  
 SOLVENT D2O  
 NS 512  
 DS 4  
 SWH 23980.814 Hz  
 FIDRES 0.365918 Hz  
 AQ 1.3664756 sec  
 RG 16384  
 DW 20.850 usec  
 DE 6.00 usec  
 TE 298.2 K  
 CNST2 145.0000000  
 D1 2.00000000 sec  
 d2 0.00344828 sec  
 D11 0.03000000 sec  
 DELTA 0.00001082 sec

----- CHANNEL f1 -----  
 NUC1 13C  
 P1 8.50 usec  
 P2 17.00 usec  
 PL1 -2.60 dB  
 SFO1 100.6228300 MHz

----- CHANNEL f2 -----  
 CPDPRG2 waltz16  
 NUC2 1H  
 P3 10.00 usec  
 P4 20.00 usec  
 PCPD2 80.00 usec  
 PL2 -1.50 dB  
 PL12 17.50 dB  
 SFO2 400.1316000 MHz

F2 - Processing parameters  
 SI 32768  
 SF 100.6127690 MHz  
 WDW EM  
 SSB 0  
 LB 1.00 Hz  
 GB 0  
 PC 1.40

Methyl (*S*)-4-amino-2-(phenylsulfonamido)butanoate [Compound 7]

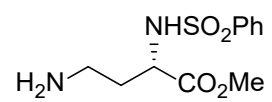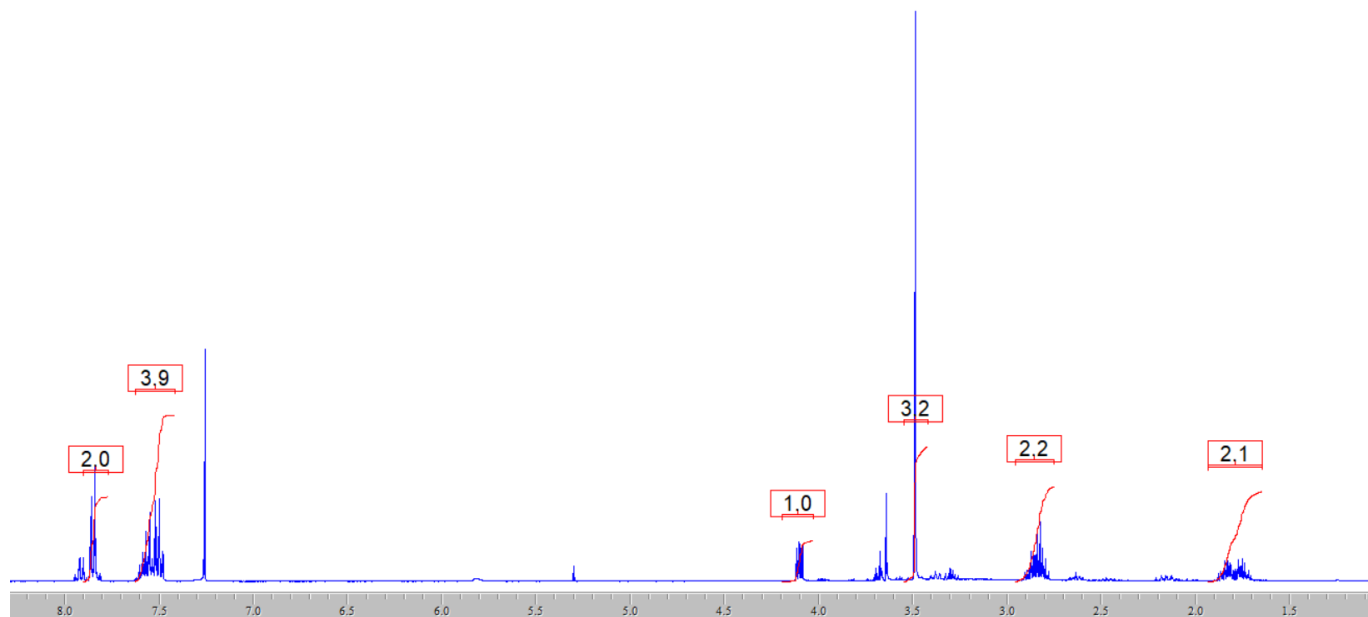

# Methyl (S)-4-amino-2-(2,4,6-trimethylphenylsulfonamido)butanoate [Compound 8]

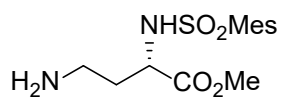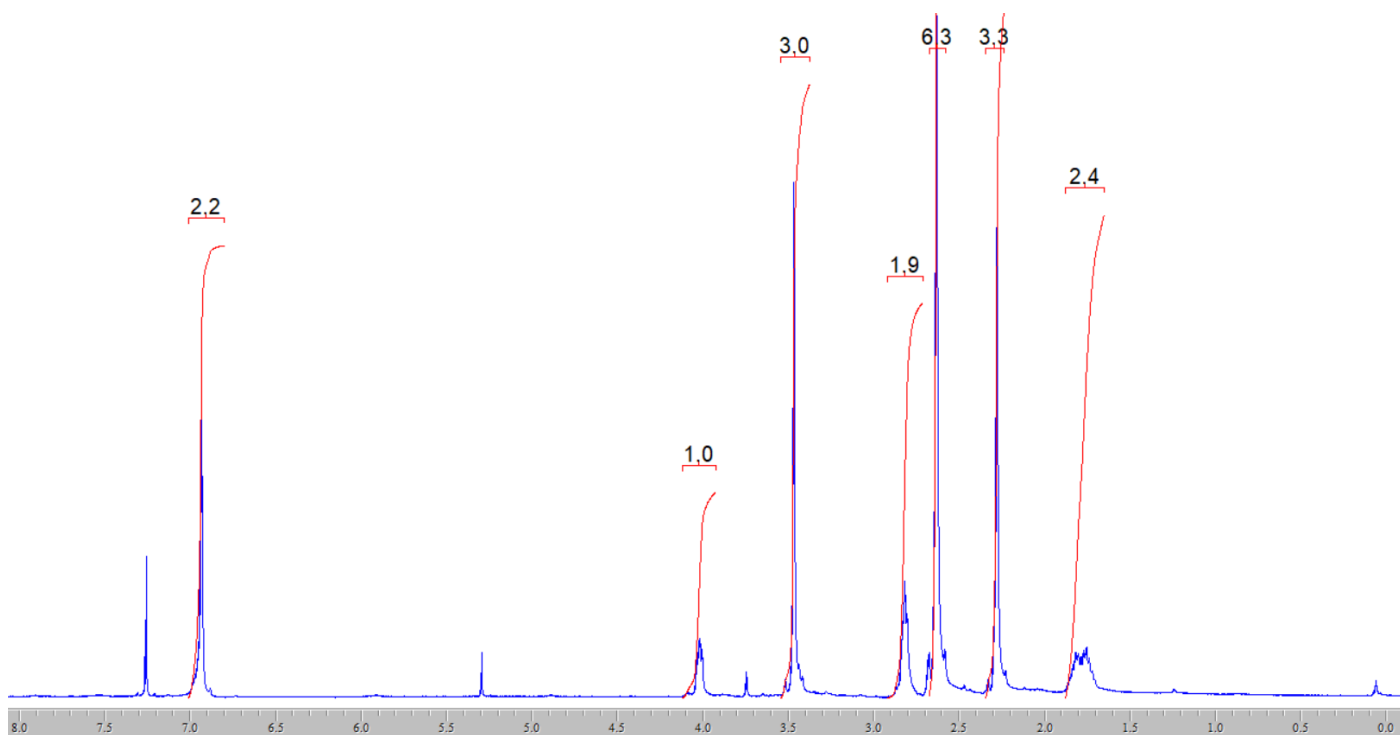

aet9-16a

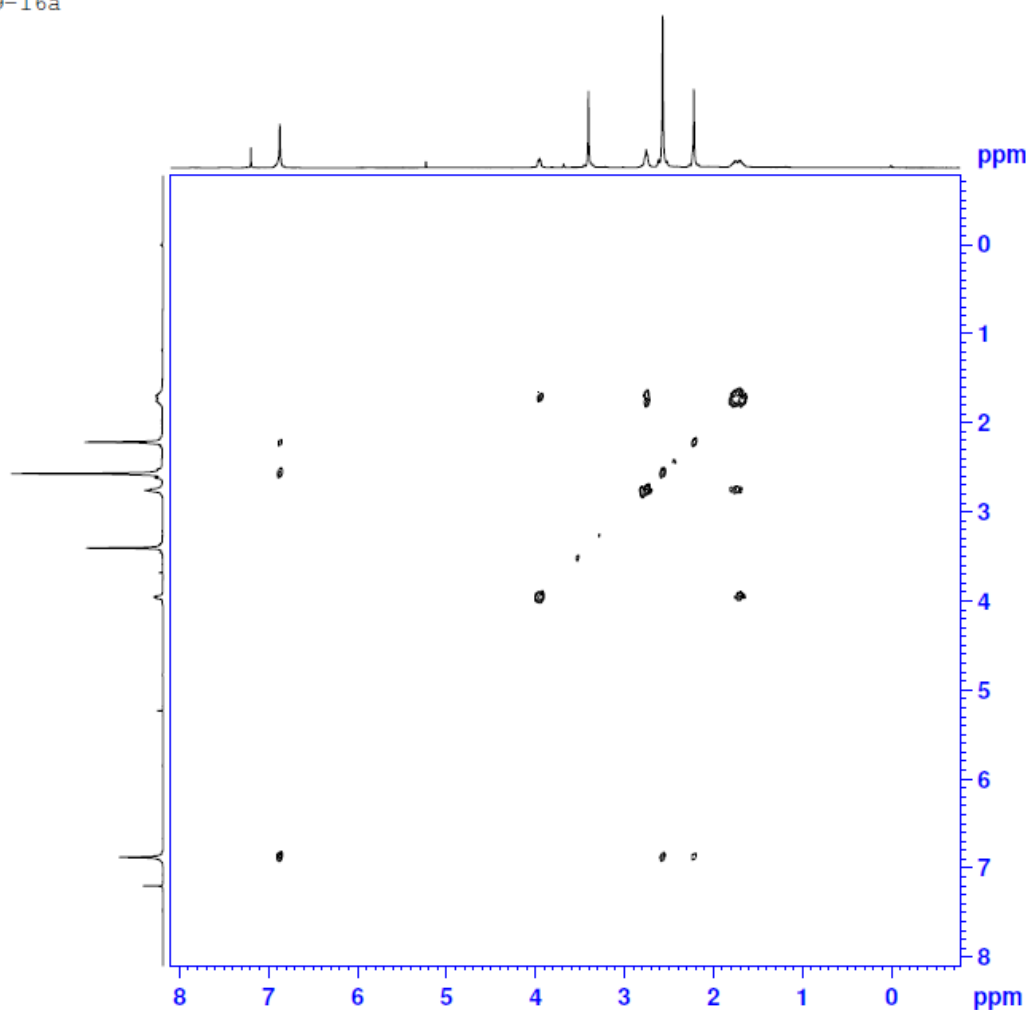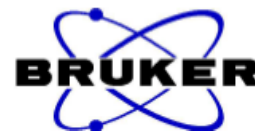

Current Data Parameters  
 NAME aet9-16a  
 EXPNO 12  
 PROCNO 1

F2 - Acquisition Parameters  
 Date\_ 20121018  
 Time 19.04  
 INSTRUM DFX400  
 PROBRD 5 mm QNP 1H/13  
 PULPROG cosygpmfzf  
 ID 2048  
 SOLVENT CDCl3  
 NS 4  
 DS 8  
 SWH 3551.136 Hz  
 FIDRES 1.733953 Hz  
 AQ 0.2884084 sec  
 RG 4597.6  
 DW 140.800 usec  
 DE 6.00 usec  
 TE 293.2 K  
 D0 0.00000300 sec  
 D1 1.90292501 sec  
 d13 0.00000400 sec  
 D16 0.00020000 sec  
 IN0 0.00028160 sec

----- CHANNEL f1 -----  
 NUC1 1H  
 P1 10.00 usec  
 PL1 -1.50 dB  
 SFO1 400.1314986 MHz

----- GRADIENT CHANNEL -----  
 GPNAM1 SINE.100  
 GPNAM2 SINE.100  
 GPNAM3 SINE.100  
 CPZ1 16.00 %  
 CPZ2 12.00 %  
 CPZ3 40.00 %  
 P16 1000.00 usec

F1 - Acquisition parameters  
 ND0 1  
 ID 128  
 SFO1 400.1315 MHz  
 FIDRES 27.743254 Hz  
 SW 8.875 ppm  
 FMODE QF

F2 - Processing parameters  
 SI 1024  
 SF 400.1300349 MHz  
 WDW SINE  
 SSB 0  
 LB 0.00 Hz  
 GB 0  
 PC 1.40

F1 - Processing parameters  
 SI 1024  
 MC2 QF  
 SF 400.1300349 MHz  
 WDW SINE  
 SSB 0  
 LB 0.00 Hz  
 GB 0

aet9-16a

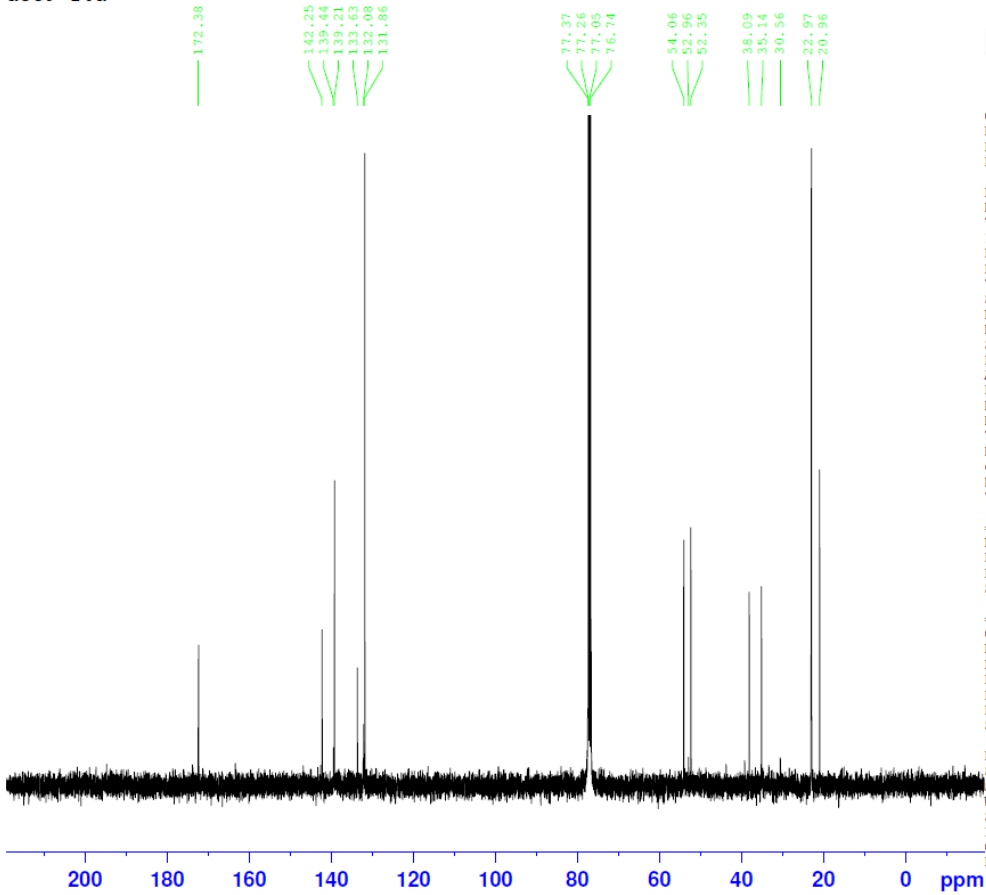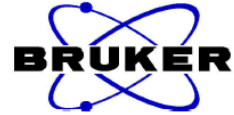

Current Data Parameters  
 NAME aet9-16a  
 EXPNO 11  
 PROCNO 1

F2 - Acquisition Parameters  
 Date\_ 20121018  
 Time 19.03  
 INSTRUM DPX400  
 PROBHD 5 mm QNP 1H/13  
 PULPROG zgpg30  
 TD 65536  
 SOLVENT CDCl3  
 NS 1024  
 DS 4  
 SWH 23980.814 Hz  
 FIDRES 0.365918 Hz  
 AQ 1.3664756 sec  
 RG 812.7  
 DW 20.850 usec  
 DE 6.00 usec  
 TE 293.2 K  
 D1 2.00000000 sec  
 d11 0.03000000 sec  
 DELTA 1.89999998 sec  
 TD0 1

===== CHANNEL f1 =====  
 NUC1 13C  
 P1 8.50 usec  
 PL1 -2.60 dB  
 SFO1 100.6228298 MHz

===== CHANNEL f2 =====  
 CPDPRG2 waltz16  
 NUC2 1H  
 PCPD2 80.00 usec  
 PL2 -1.50 dB  
 PL12 17.50 dB  
 PL13 17.50 dB  
 SFO2 400.1316005 MHz

F2 - Processing parameters  
 SI 32768  
 SF 100.6127690 MHz  
 WDW EM  
 SSB 0  
 LB 1.00 Hz  
 GB 0  
 PC 1.40

aet9-16a

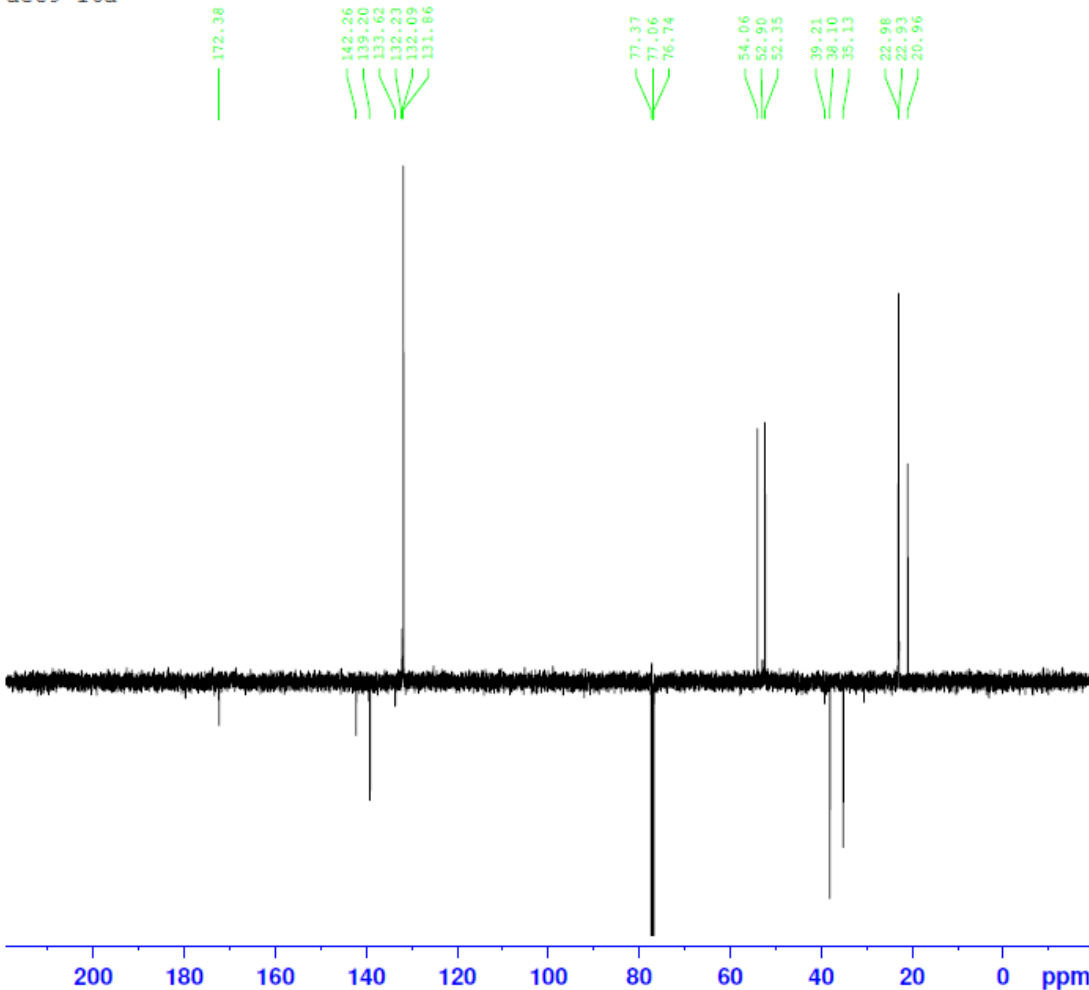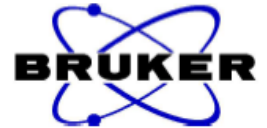

Current Data Parameters  
 NAME aet9-16a  
 EXPNO 13  
 PROCNO 1

F2 - Acquisition Parameters  
 Date\_ 20121018  
 Time 19.53  
 INSTRUM DPX400  
 PROBHD 5 mm QNP 1H/13  
 PULPROG deptq\_135  
 TD 65536  
 SOLVENT CDCl3  
 NS 512  
 DS 4  
 SWH 23980.814 Hz  
 FIDRES 0.365918 Hz  
 AQ 1.3664756 sec  
 RG 11585.2  
 DW 20.850 usec  
 DE 6.00 usec  
 TE 292.2 K  
 CNST2 145.0000000  
 D1 2.00000000 sec  
 d2 0.00344828 sec  
 D11 0.03000000 sec  
 DELTA 0.00001082 sec

----- CHANNEL f1 -----  
 NUC1 13C  
 P1 8.50 usec  
 P2 17.00 usec  
 PL1 -2.60 dB  
 SFO1 100.6228300 MHz

----- CHANNEL f2 -----  
 CPDPRG2 waltz16  
 NUC2 1H  
 P3 10.00 usec  
 P4 20.00 usec  
 PCPD2 80.00 usec  
 PL2 -1.50 dB  
 PL12 17.50 dB  
 SFO2 400.1316000 MHz

F2 - Processing parameters  
 SI 32768  
 SF 100.6127690 MHz  
 WDW EM  
 SSB 0  
 LB 1.00 Hz  
 GB 0  
 PC 1.40

aet9-16a

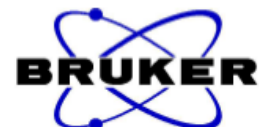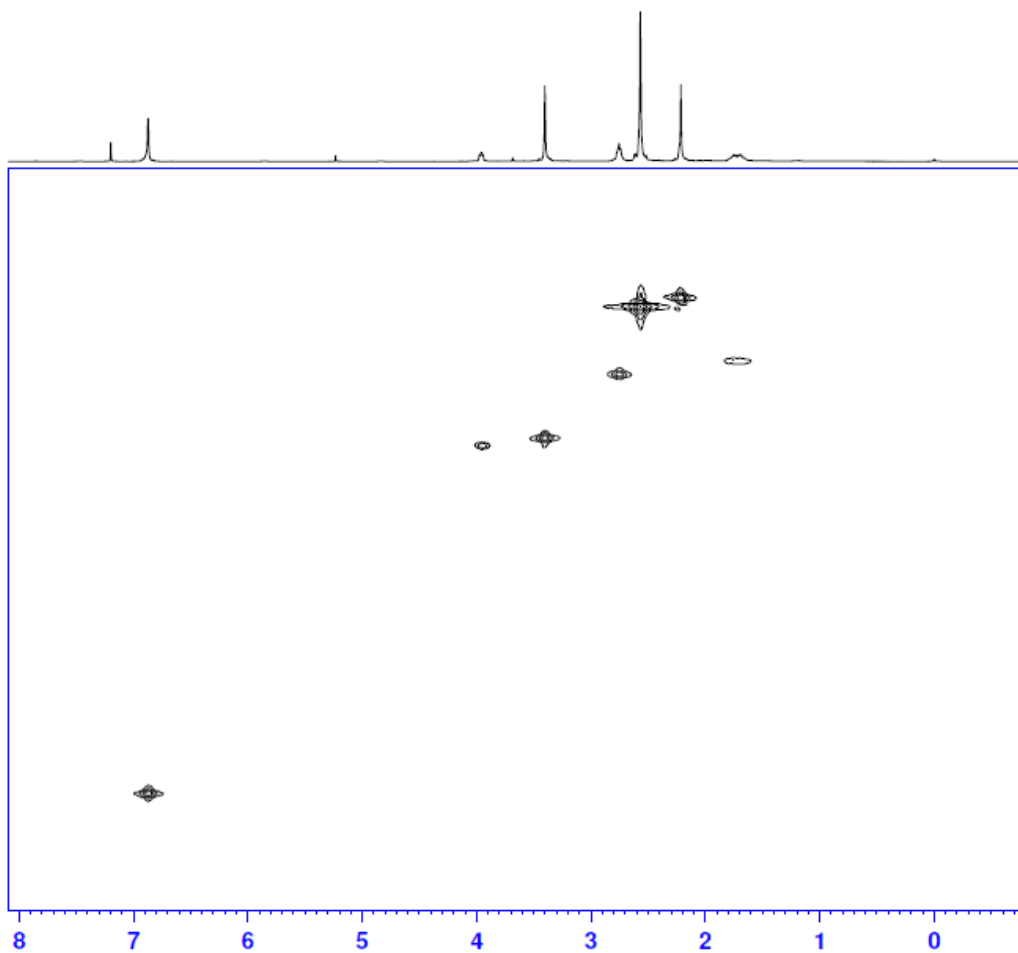

Current Data Parameters  
NAME aet9-16a  
EXPNO 14  
PROCNO 1

F2 - Acquisition Parameters  
Date\_ 20121016  
Time 19.54  
INSTRUM spect  
PROBHD 5 mm QNP 1H/13  
PULPROG zgpg30  
TD 1024  
SOLVENT ccd13  
NS 4  
DS 16  
SWH 355.176 Hz  
FIDRES 3.467907 Hz  
AQ 0.1442292 sec  
RG 395  
DM 140.800 usec  
DE 6.00 usec  
TE 300.2  
CMT2 145.0000000  
d0 0.0000000 sec  
d1 1.4819199 sec  
d2 0.00344828 sec  
d3 0.00000000 sec  
d4 0.00000400 sec  
d5 0.00020000 sec  
DELTA1 0.0022424 sec  
IND 0.00003000 sec

----- CHANNEL F1 -----  
NUC1 1H  
P1 10.00 usec  
PC 20.00 usec  
PL1 -1.50 dB  
SFO1 400.1314984 MHz

----- CHANNEL F2 -----  
CPDPRG2 zgpg30  
NUC2 13C  
P3 8.00 usec  
PCPD2 74.00 usec  
PL2 -2.00 dB  
PL12 18.00 dB  
SFO2 100.6203140 MHz

----- GRADIENT CHANNEL -----  
GPRAM1 SINE.100  
GPRAM2 SINE.100  
GPRAM3 SINE.100  
GPE1 50.00 %  
GPE2 30.00 %  
GPE3 40.10 %  
P16 1000.00 usec

F1 - Acquisition parameters  
RG 2  
TD 128  
SFO1 100.6203 MHz  
FIDRES 130.208328 Hz  
SW 165.639 ppm  
F2MODE QF

F2 - Processing parameters  
SI 1024  
SF 400.130349 MHz  
WDW QF  
SSB 0  
LB 0.00 Hz  
GB 0  
PC 1.40

F1 - Processing parameters  
SI 1024  
MC2 QF  
SF 100.6127630 MHz  
WDW QF  
SSB 0  
LB 0.00 Hz  
GB 0



Methyl (S)-4-((1*S*\*,3*R*\*)-3-((1,8-naphthyridin-2-yl)methyl)cyclobutane-1-carboxamido)-2-

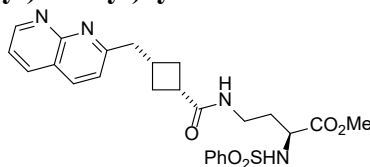

(phenylsulfonamido)butanoate [Compound 17]

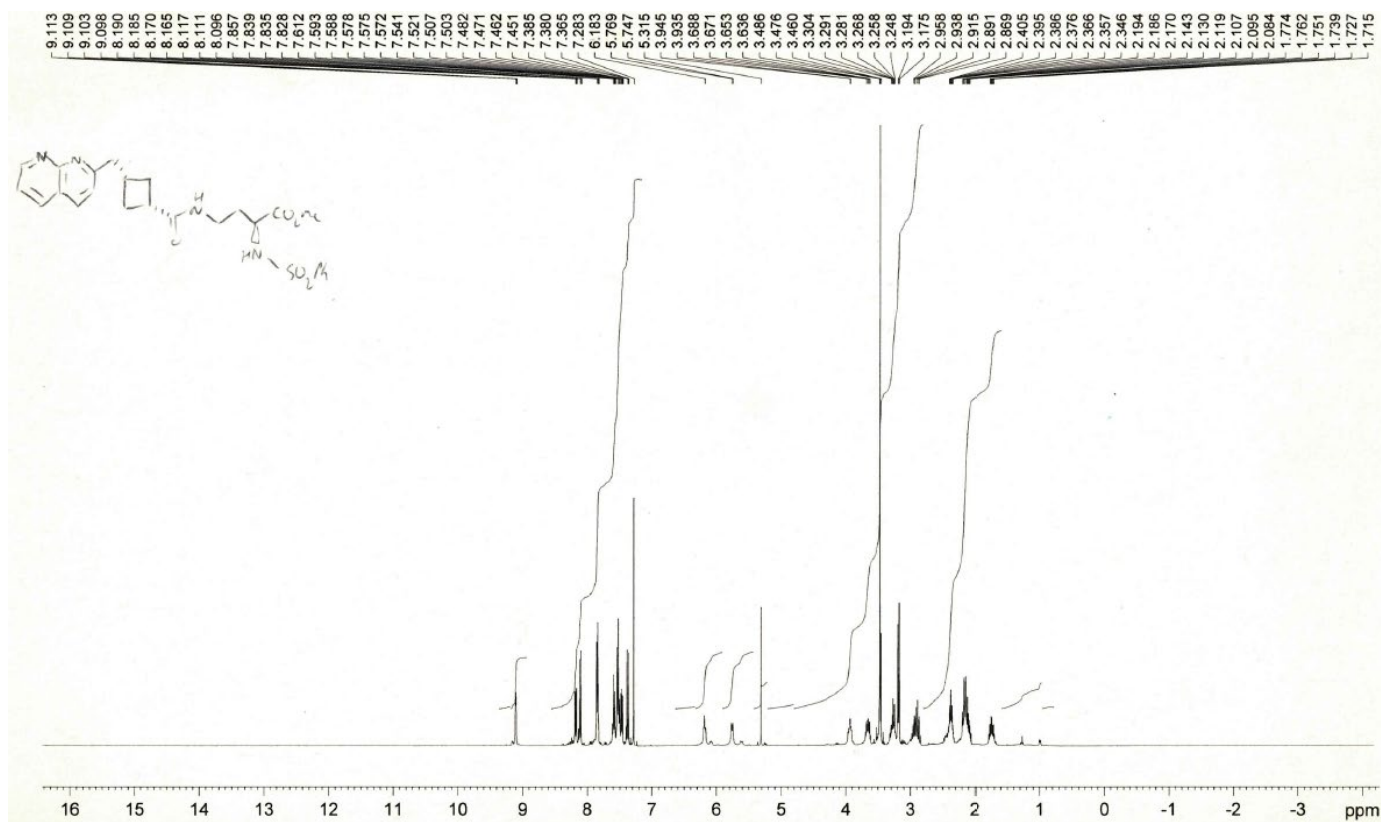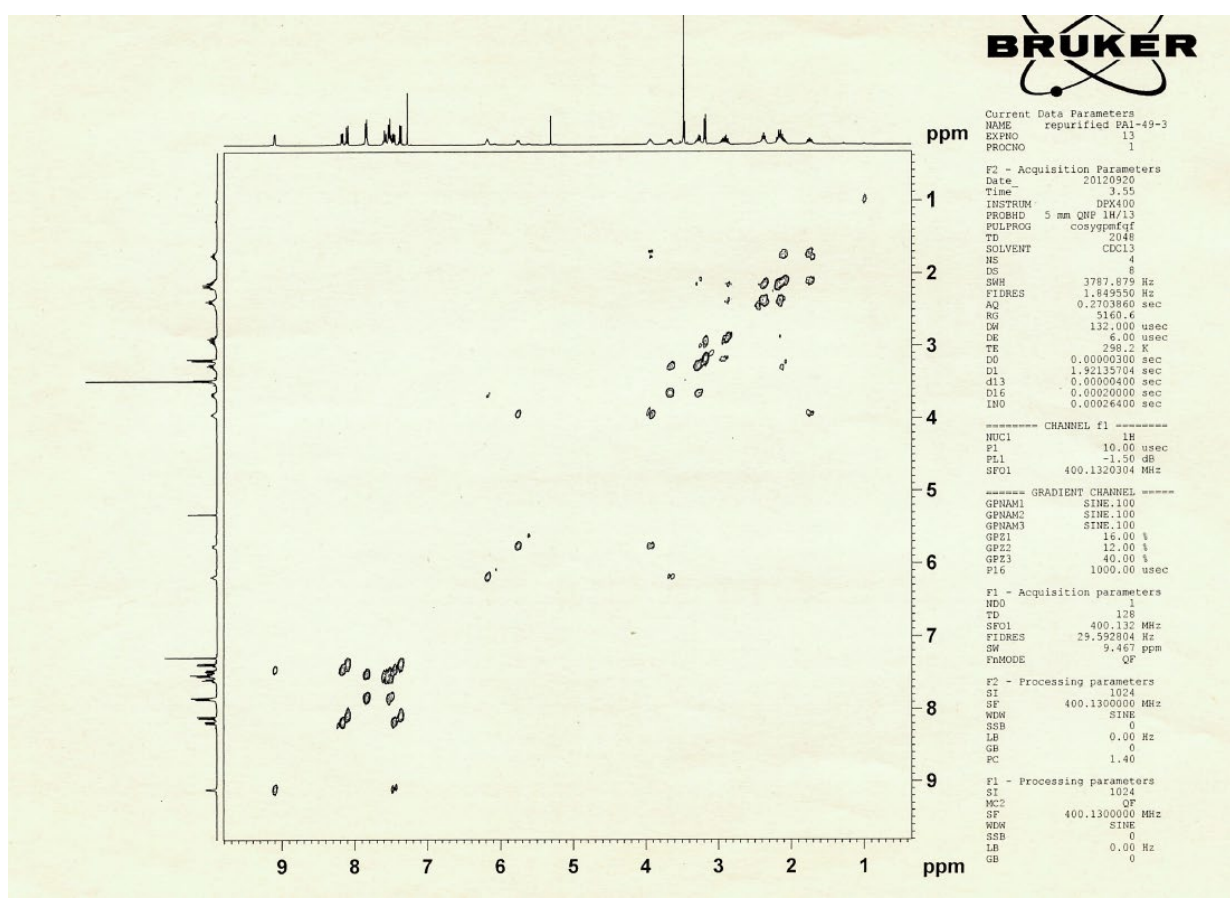

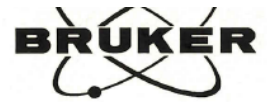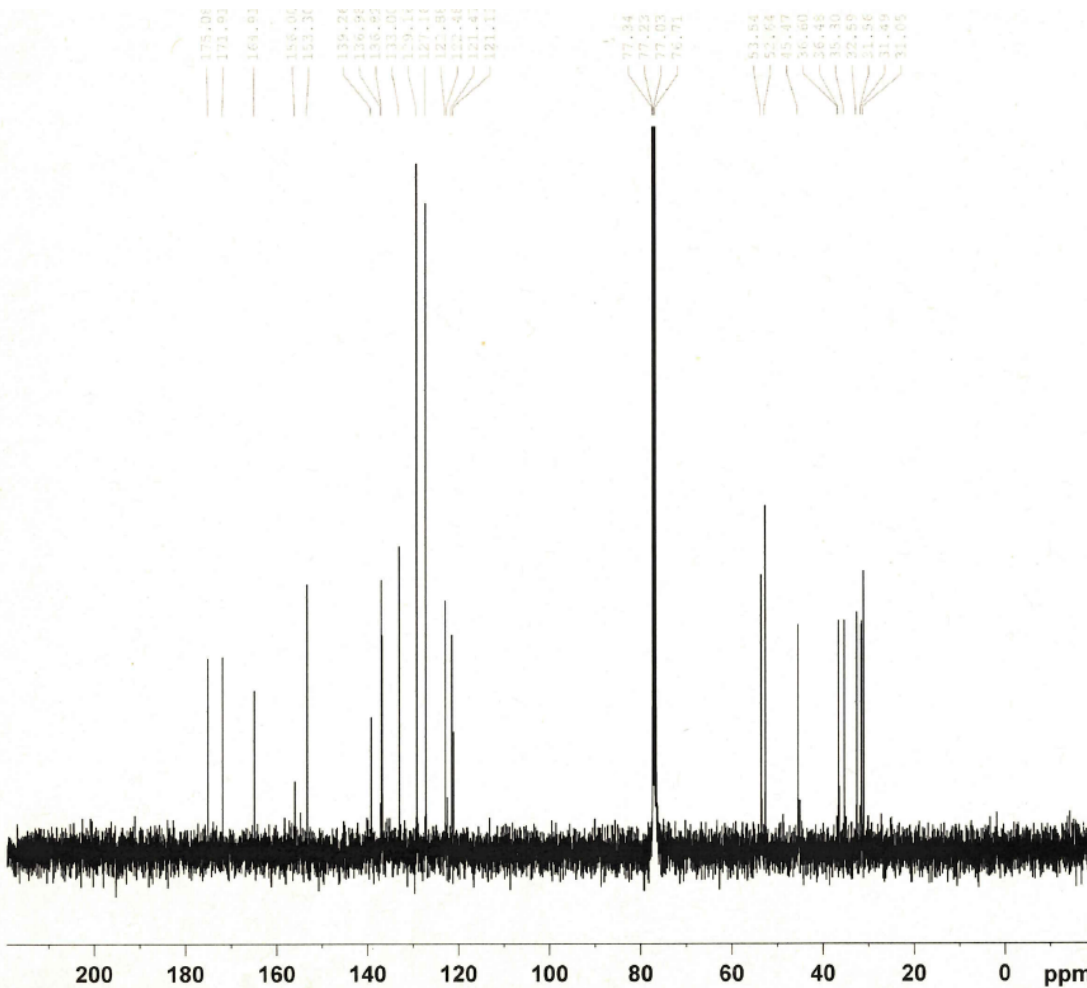

Current Data Parameters  
 NAME repurified PA1-49-3  
 EXPNO 11  
 PROCNO 1

F2 - Acquisition Parameters  
 Date 20120920  
 Time 3.24  
 INSTRUM DPX400  
 PROBHD 5 mm QNP 1H/13  
 PULPROG zgpg30  
 TD 65536  
 SOLVENT CDCl3  
 NS 1024  
 DS 4  
 SWH 23980.814 Hz  
 FIDRES 0.365918 Hz  
 AQ 1.3664756 sec  
 RG 1024  
 DW 20.850 usec  
 DE 6.00 usec  
 TE 298.2 K  
 D1 2.00000000 sec  
 d11 0.03000000 sec  
 DELTA 1.89999998 sec  
 TDO 1

===== CHANNEL f1 =====  
 NUC1 13C  
 P1 8.50 usec  
 PL1 -2.60 dB  
 SFO1 100.6228298 MHz

===== CHANNEL f2 =====  
 CPDPRG2 waltz16  
 NUC2 1H  
 PCPD2 80.00 usec  
 PL2 -1.50 dB  
 PL12 17.50 dB  
 PL13 17.50 dB  
 SFO2 400.1316005 MHz

F2 - Processing parameters  
 SI 32768  
 SF 100.6127690 MHz  
 WDW EM  
 SSB 0  
 LB 1.00 Hz  
 GB 0  
 PC 1.40

repurified PA1-49-3

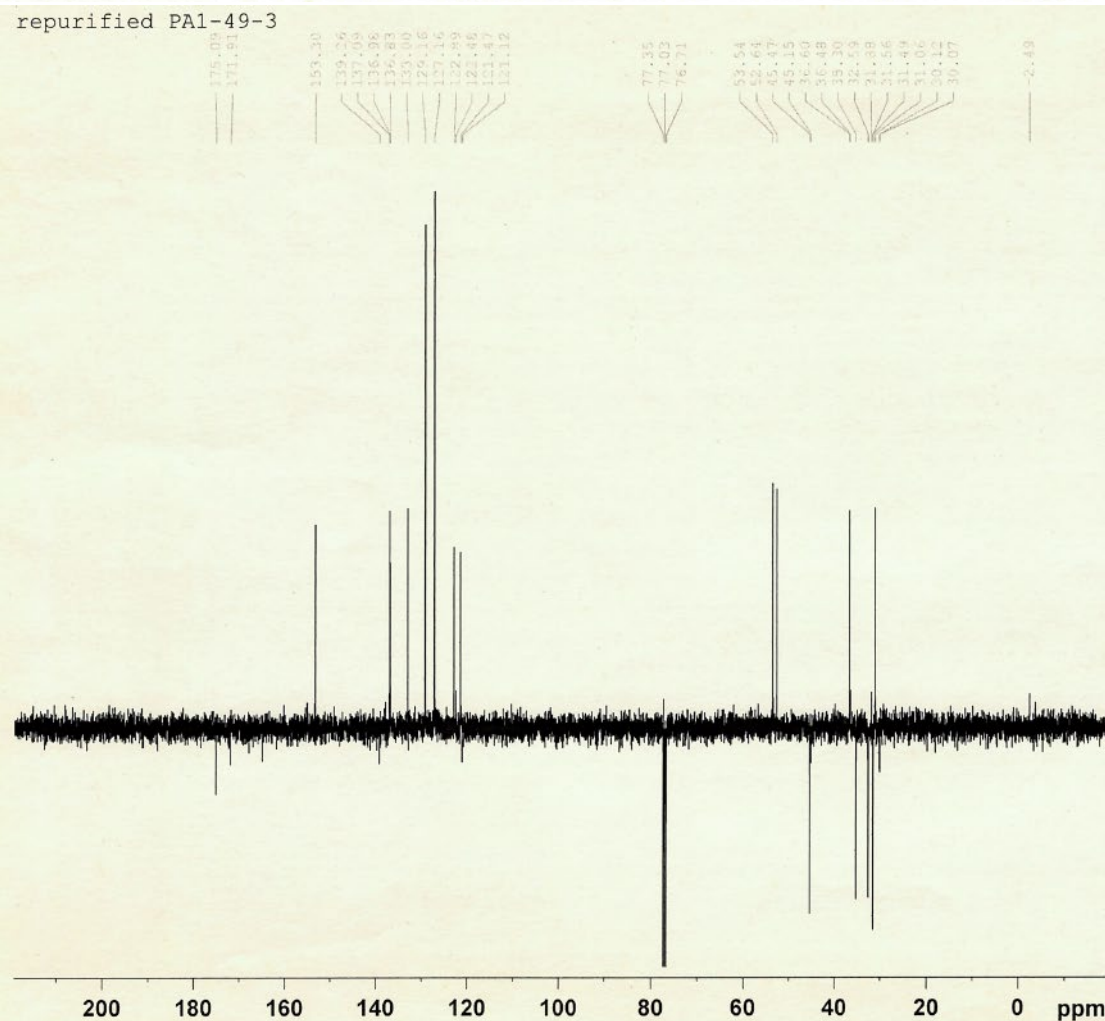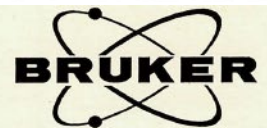

Current Data Parameters  
 NAME repurified PA1-49-3  
 EXPNO 12  
 PROCNO 1

F2 - Acquisition Parameters  
 Date 20120920  
 Time 3.54  
 INSTRUM DPX400  
 PROBHD 5 mm QNP 1H/13  
 PULPROG deptq 135  
 TD 65536  
 SOLVENT CDCl3  
 NS 512  
 DS 4  
 SWH 23980.814 Hz  
 FIDRES 0.365918 Hz  
 AQ 1.3664756 sec  
 RG 11585.2  
 DW 20.850 usec  
 DE 6.00 usec  
 TE 298.2 K  
 CNST2 145.0000000  
 D1 2.00000000 sec  
 d2 0.00344828 sec  
 D11 0.03000000 sec  
 DELTA 0.00001082 sec

===== CHANNEL f1 =====  
 NUC1 13C  
 P1 8.50 usec  
 P2 17.00 usec  
 PL1 -2.60 dB  
 SFO1 100.6228300 MHz

===== CHANNEL f2 =====  
 CPDPRG2 waltz16  
 NUC2 1H  
 P3 10.00 usec  
 P4 20.00 usec  
 PCPD2 80.00 usec  
 PL2 -1.50 dB  
 PL12 17.50 dB  
 SFO2 400.1316000 MHz

F2 - Processing parameters  
 SI 32768  
 SF 100.6127690 MHz  
 WDW EM  
 SSB 0  
 LB 1.00 Hz  
 GB 0  
 PC 1.40

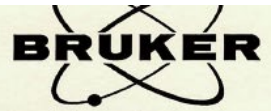

Current Data Parameters  
NAME repurified P1-49-3  
EXPRO 14  
PROCNO 1

F2 - Acquisition Parameters  
Date\_ 20120920  
Time\_ 4.15

INSTRUM DEX400  
PROBHD 5 mm QNP 1H/13  
PULPROG hmqcpgpgf  
TD 1024  
SOLVENT CDCl3  
NS 4  
DS 16  
SWH 3787.879 Hz  
FIDRES 3.699100 Hz  
AQ 0.1352180 sec  
RG 26008  
RW 132.000 usec  
DE 6.00 usec  
TE 298.2 K  
CHST2 145.000000  
d0 0.0000300 sec  
d1 1.49180806 sec  
d2 0.00344828 sec  
d12 0.00002000 sec  
d13 0.00000400 sec  
d16 0.00020000 sec  
DELTA1 0.00222428 sec  
IN0 0.00003000 sec

===== CHANNEL f1 =====  
NUC1 1H  
P1 10.00 usec  
PC 20.00 usec  
PL1 -1.50 dB  
SFO1 400.1320304 MHz

===== CHANNEL f2 =====  
CPDPRG2 gmp  
NUC2 13C  
P3 8.00 usec  
PCPD2 74.00 usec  
PL2 -3.00 dB  
PL12 18.00 dB  
SFO2 100.6203140 MHz

===== GRADIENT CHANNEL =====  
GPNAM1 SINE.100  
GPNAM2 SINE.100  
GPNAM3 SINE.100  
GPZ1 50.00 %  
GPZ2 30.00 %  
GPZ3 40.10 %  
P16 1000.00 usec

F1 - Acquisition parameters  
ND0 2  
TD 128  
SFO1 100.6203140 MHz  
FIDRES 130.208328 Hz  
SW 165.639 ppm  
FMODE QF

F2 - Processing parameters  
SI 1024  
SF 400.1300000 MHz  
WEN QSIGN  
SSB 2  
LB 0.00 Hz  
GB 0  
PC 1.40

F1 - Processing parameters  
SI 1024  
MC2 QF  
SF 100.6127690 MHz  
WEN QSIGN  
SSB 2  
LB 0.00 Hz  
GB 0

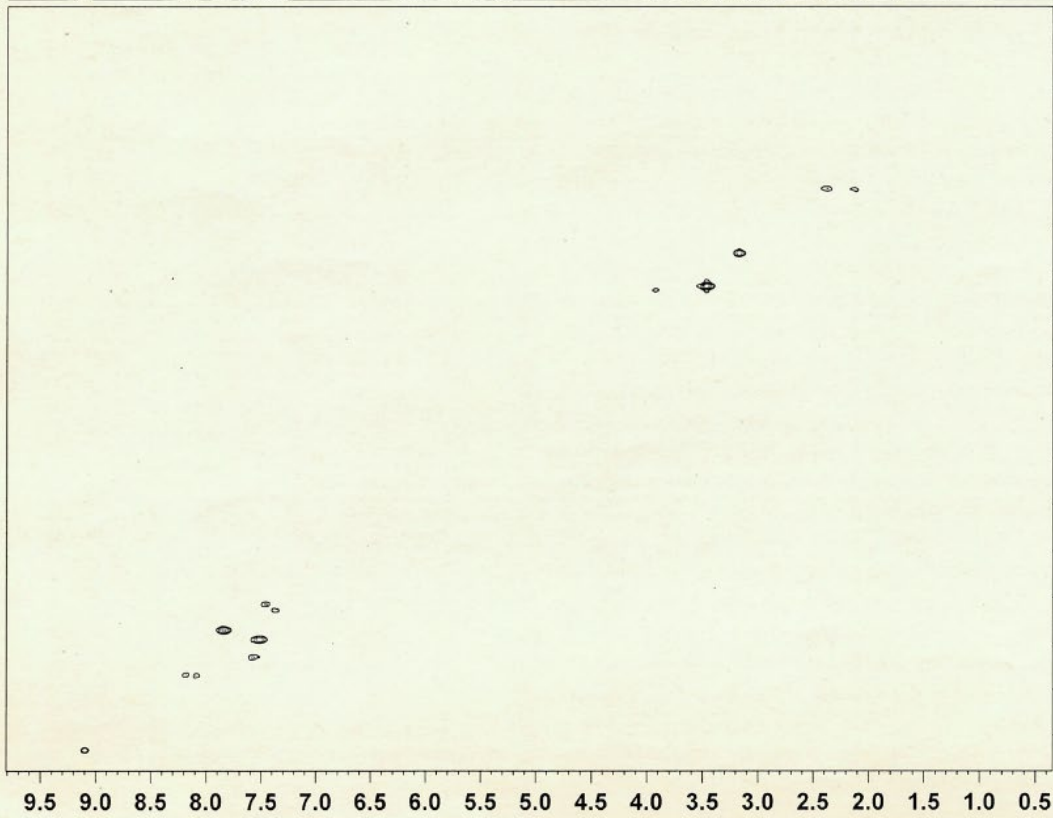



Methyl (S)-4-((1*s*\*,3*R*\*)-3-((1,8-naphthyridin-2-yl)methyl)cyclobutane-1-carboxamido)-2-(2,4,6-

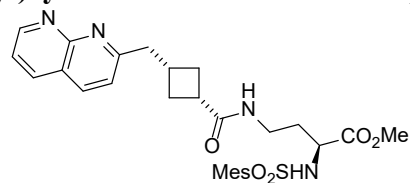

trimethylphenylsulfonamido)butanoate [Compound 18]

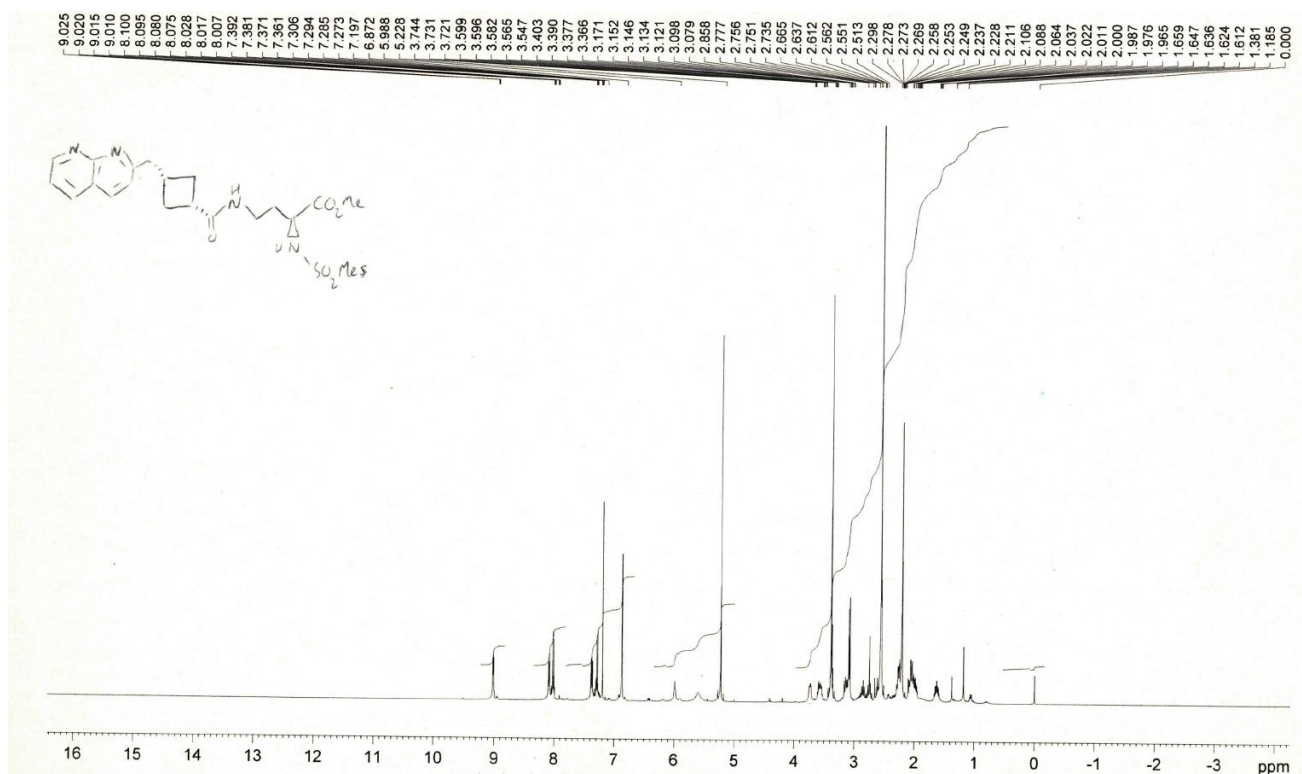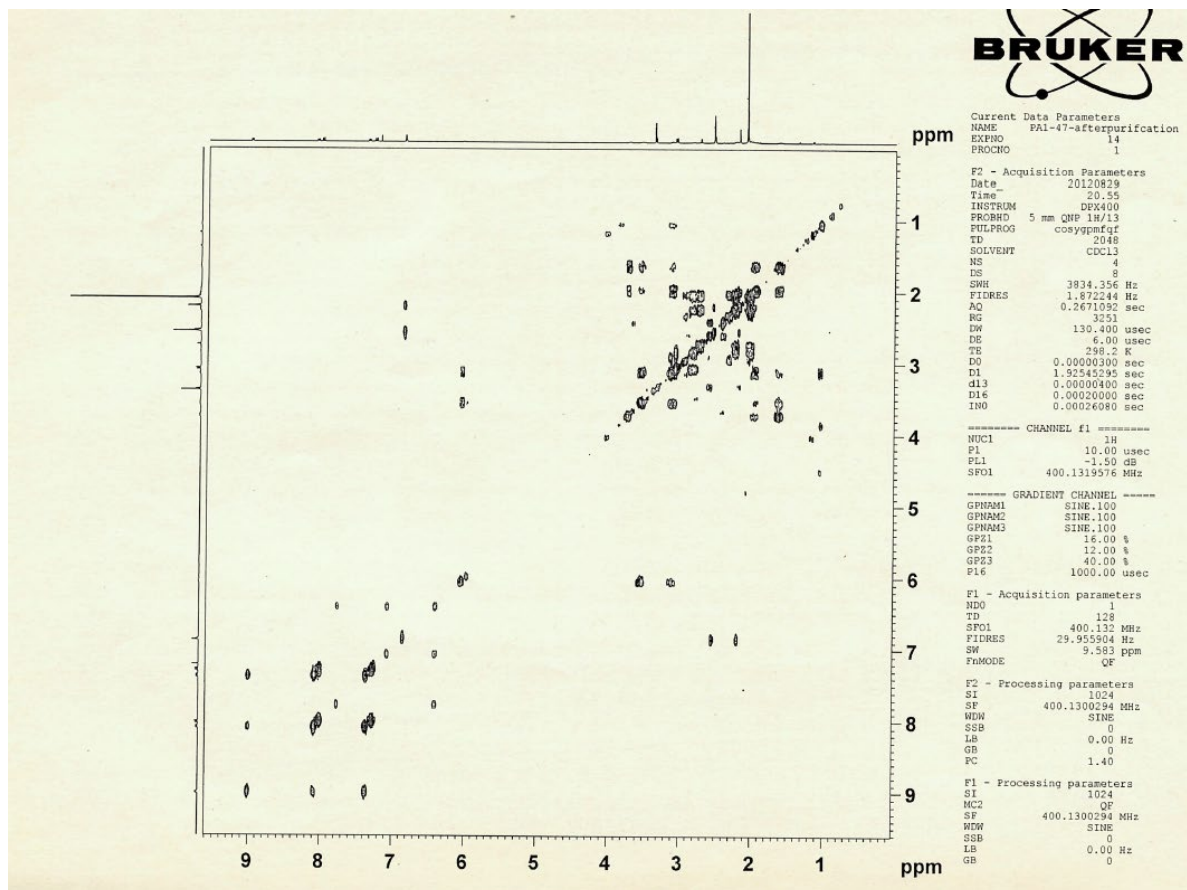

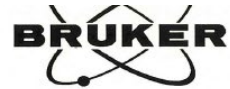

Current Data Parameters  
 NAME PA1-47-afterpurification  
 EXPNO 20  
 PROCNO 1

F2 - Acquisition Parameters  
 Date\_ 20120829  
 Time 22.16  
 INSTRUM DPX400  
 PROBHD 5 mm QNP 1H/13  
 PULPROG zgpg30  
 TD 65536  
 SOLVENT CDCl3  
 NS 1024  
 DS 4  
 SWH 23980.814 Hz  
 FIDRES 0.365918 Hz  
 AQ 1.3664756 sec  
 RG 1149.4  
 DW 20.850 usec  
 DE 6.00 usec  
 TE 298.2 K  
 D1 2.00000000 sec  
 d11 0.03000000 sec  
 DELTA 1.89999998 sec  
 TDO 1

===== CHANNEL f1 =====  
 NUC1 13c  
 P1 8.50 usec  
 PL1 -2.60 dB  
 SFO1 100.6228298 MHz

===== CHANNEL f2 =====  
 CPDPRG2 waltz16  
 NUC2 1H  
 PCPD2 80.00 usec  
 PL2 -1.50 dB  
 PL12 17.50 dB  
 PL13 17.50 dB  
 SFO2 400.1316005 MHz

F2 - Processing parameters  
 SI 32768  
 SF 100.6127690 MHz  
 WDW EM  
 SSB 0  
 LB 1.00 Hz  
 GB 0  
 PC 1.40

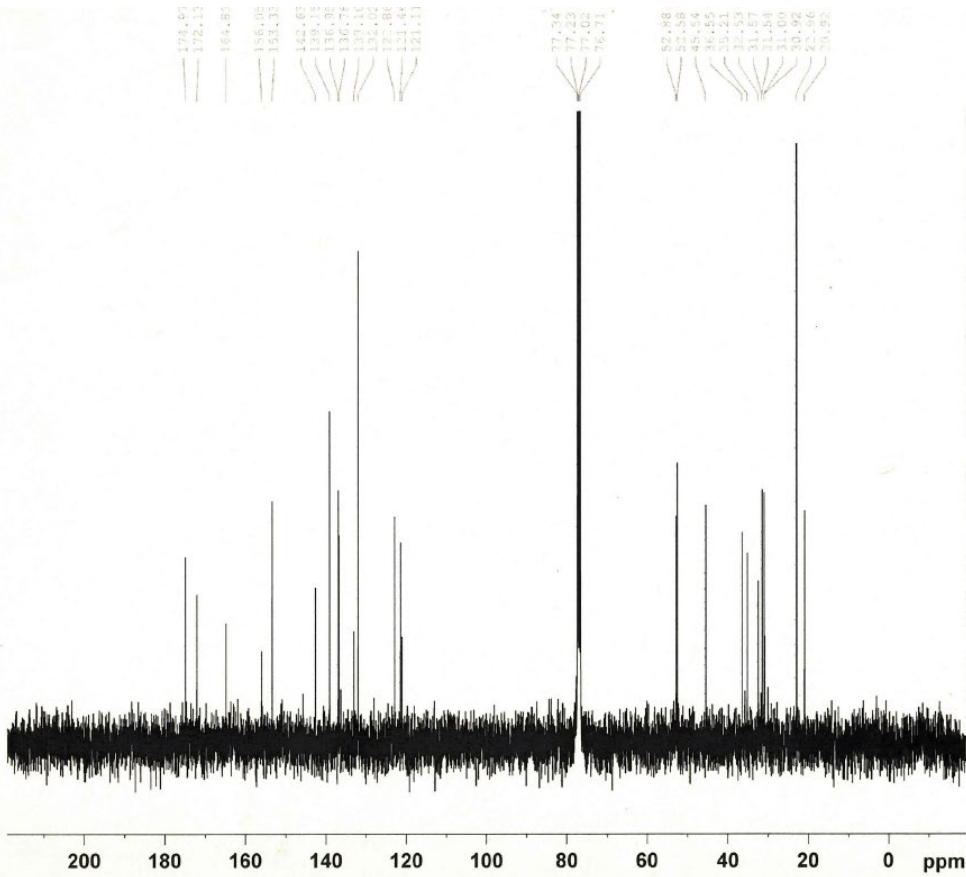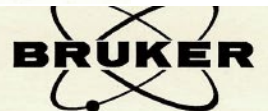

Current Data Parameters  
 NAME PA1-47-afterpurificati  
 EXPNO 22  
 PROCNO 1

F2 - Acquisition Parameters  
 Date\_ 20120829  
 Time 22.48  
 INSTRUM DPX400  
 PROBHD 5 mm QNP 1H/13  
 PULPROG deptq 135  
 TD 65536  
 SOLVENT CDCl3  
 NS 512  
 DS 4  
 SWH 23980.814 Hz  
 FIDRES 0.365918 Hz  
 AQ 1.3664756 sec  
 RG 11585.2  
 DW 20.850 usec  
 DE 6.00 usec  
 TE 298.2 K  
 CNST2 145.0000000  
 D1 2.00000000 sec  
 d2 0.00344828 sec  
 d11 0.03000000 sec  
 DELTA 0.00001082 sec

===== CHANNEL f1 =====  
 NUC1 13C  
 P1 8.50 usec  
 P2 17.00 usec  
 PL1 -2.60 dB  
 SFO1 100.6228300 MHz

===== CHANNEL f2 =====  
 CPDPRG2 waltz16  
 NUC2 1H  
 P3 10.00 usec  
 P4 20.00 usec  
 PCPD2 80.00 usec  
 PL2 -1.50 dB  
 PL12 17.50 dB  
 SFO2 400.1316000 MHz

F2 - Processing parameters  
 SI 32768  
 SF 100.6127690 MHz  
 WDW EM  
 SSB 0  
 LB 1.00 Hz  
 GB 0  
 PC 1.40

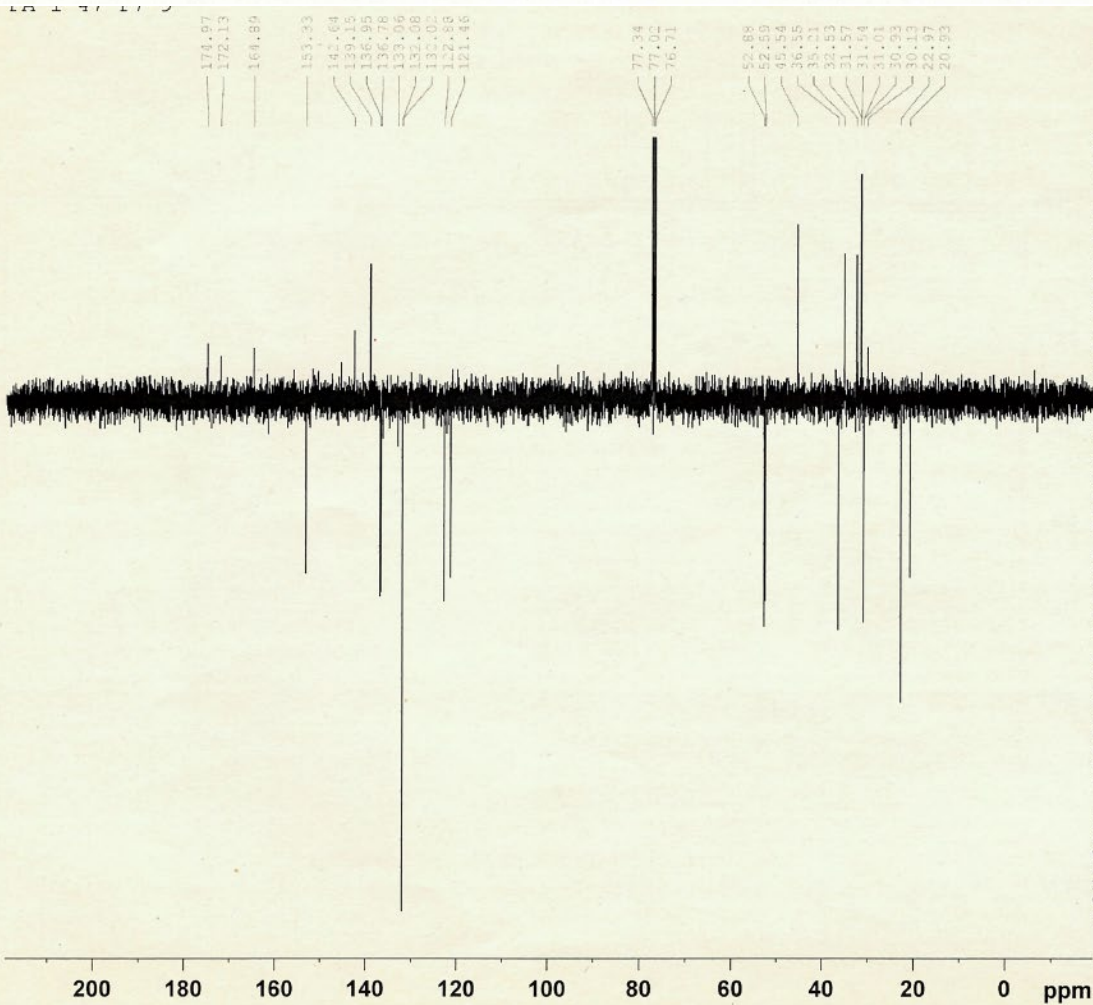

Current Data Parameters  
 NAME PA1-47-afterpurification  
 EXPRO 1  
 PROCNO 1

ppm

0

20

40

60

80

100

120

140

ppm

```

F2 - Acquisition Parameters
Date_      20120829
Time       20.40
INSTRUM    DFX400
PROBHD     5 mm QNP 1H/13
PULPROG    zgpg30
TD         1024
SOLVENT    CDCl3
NS         4
DS         16
SMH        3834.356 Hz
FIDRES     3.744488 Hz
AQ         0.1335786 sec
RG         7298.2
DM         130.400 usec
DE         6.00 usec
TE         298.2 K
CHST1     145.0000000
d0         0.0000100 sec
d1         1.49385595 sec
d2         0.00344828 sec
d12        0.0000300 sec
d13        0.00006400 sec
d15        0.00020000 sec
DELTA1     0.0022428 sec
IN0        0.00003000 sec

----- CHANNEL f1 -----
NUC1       1H
P1         10.00 usec
P2         20.00 usec
FL1        -1.50 dB
SFO1       400.1319576 MHz

----- CHANNEL f2 -----
CPDPRG2    garp
NUC2       13C
P3         8.00 usec
PCPD2      74.00 usec
FL2        -1.00 dB
FL12       18.00 dB
SFO2       100.6203140 MHz

----- GRADIENT CHANNEL -----
GPMAM1     SINE.100
GPMAM2     SINE.100
GPMAM3     SINE.100
GPZ1       50.00 %
GPZ2       30.00 %
GPZ3       40.10 %
P16        1000.00 usec

F1 - Acquisition parameters
ND0        2
TD         128
SFO1       100.6203 MHz
FIDRES     130.208320 Hz
SW         165.628 ppm
ENMODE     QF

F2 - Processing parameters
SI         1024
SF         400.1300294 MHz
WDW        QSINE
SSB        2
LB         0.60 Hz
GB         0
PC         1.40

F1 - Processing parameters
SI         1024
MC2        QF
SF         100.6127680 MHz
WDW        QSINE
SSB        2
LB         0.60 Hz
GB         0
  
```

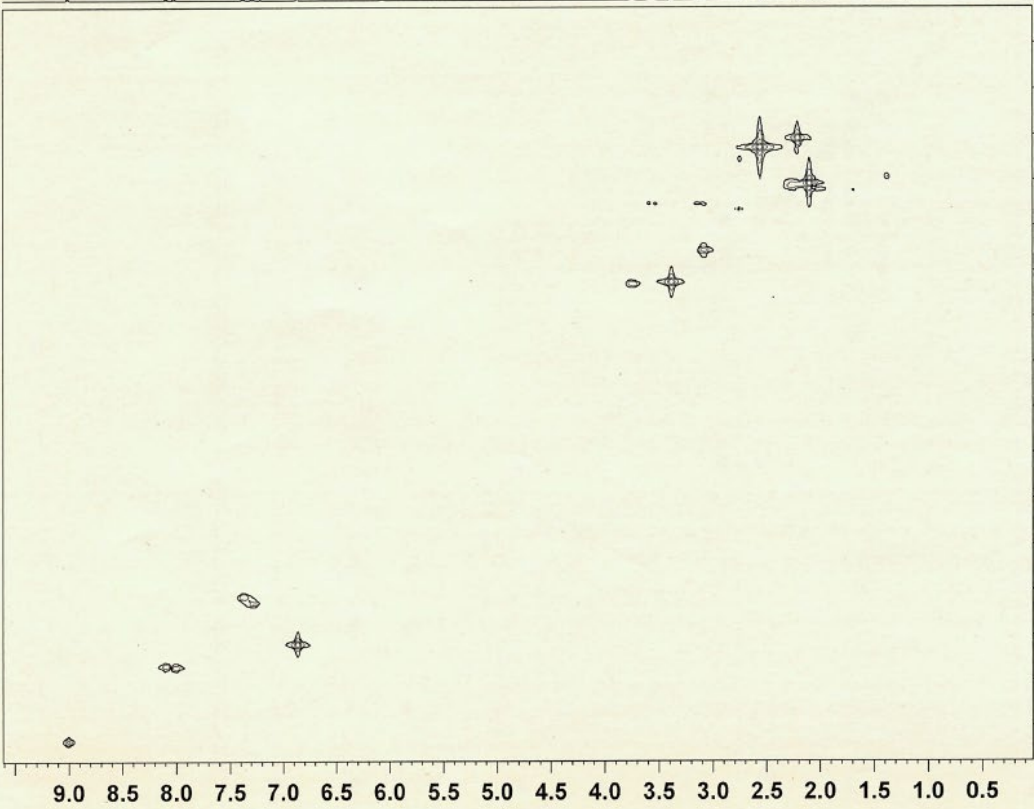

Methyl (*S*)-4-((1*r*\*,3*R*\*)-3-(2-(1,8-naphthyridin-2-yl)ethyl)cyclobutane-1-carboxamido)-2-

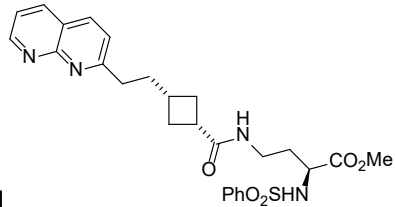

(phenylsulfonamido)butanoate [Compound 19]

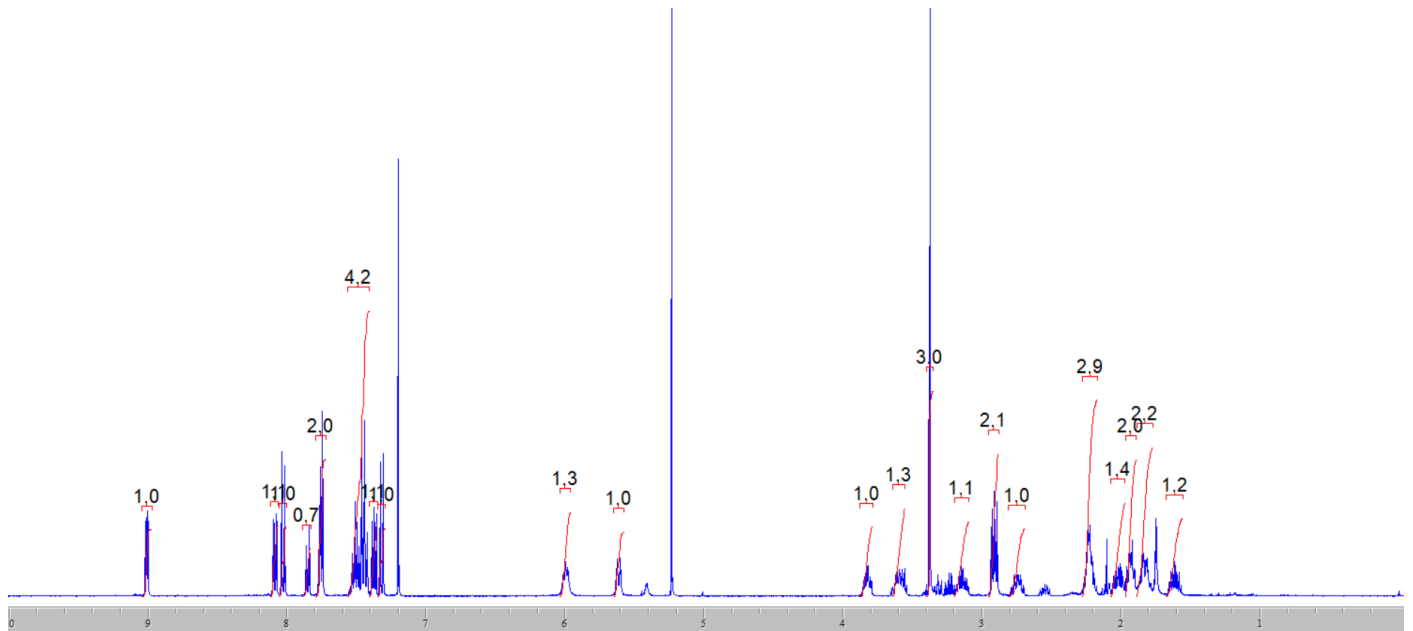

aet9-40-3

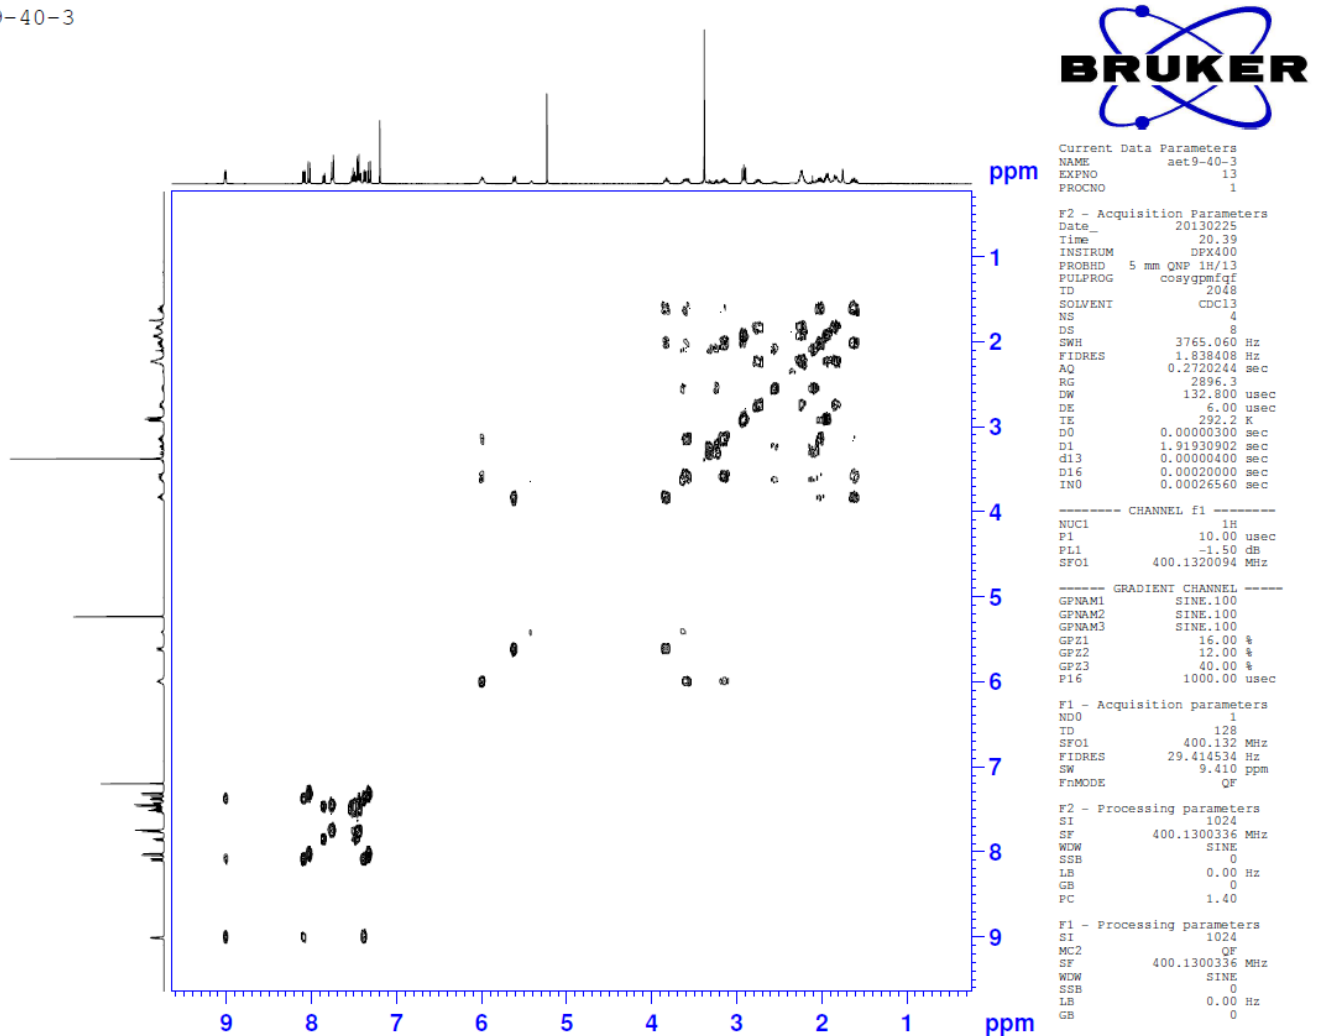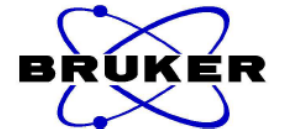

Current Data Parameters  
NAME aet9-40-3  
EXPNO 13  
PROCNO 1

F2 - Acquisition Parameters  
Date\_ 20130225  
Time 20.39  
INSTRUM DPX400  
PROBHD 5 mm QNP 1H/13  
PULPROG cosygmrfqf  
TD 2048  
SOLVENT CDCl3  
NS 4  
DS 8  
SWH 3765.060 Hz  
FIDRES 1.838408 Hz  
AQ 0.2720244 sec  
RG 2896.3  
DW 132.800 usec  
DE 6.00 usec  
TE 292.2 K  
DO 0.00000300 sec  
D1 1.91930902 sec  
d13 0.00000400 sec  
D16 0.00020000 sec  
IN0 0.00026560 sec

----- CHANNEL f1 -----  
NUC1 1H  
P1 10.00 usec  
PL1 -1.50 dB  
SFO1 400.1320094 MHz

----- GRADIENT CHANNEL -----  
GPNAM1 SINE.100  
GPNAM2 SINE.100  
GPNAM3 SINE.100  
GPZ1 16.00 %  
GPZ2 12.00 %  
GPZ3 40.00 %  
P16 1000.00 usec

F1 - Acquisition parameters  
ND0 1  
TD 128  
SFO1 400.132 MHz  
FIDRES 29.414534 Hz  
SW 9.410 ppm  
FMODE QF

F2 - Processing parameters  
SI 1024  
SF 400.1300336 MHz  
WDW SINE  
SSB 0  
LB 0.00 Hz  
GB 0  
PC 1.40

F1 - Processing parameters  
SI 1024  
MC2 QF  
SF 400.1300336 MHz  
WDW SINE  
SSB 0  
LB 0.00 Hz  
GB 0



aet9-40-3

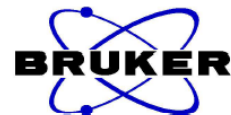

```

Current Data Parameters
NAME      aet9-40-3
EXPNO    11
PROCNO   1

F2 - Acquisition Parameters
Date_    20130225
Time     20.08
INSTRUM  DPX400
PROBHD   5 mm QNP 1H/13
PULPROG  zgpg30
TD       65536
SOLVENT  CDC13
NS       1024
DS       4
SWH      23980.814 Hz
FIDRES   0.365918 Hz
AQ       1.3664756 sec
RG       724.1
DW       20.850 usec
DE       6.00 usec
TE       293.2 K
D1       2.00000000 sec
d11      0.03000000 sec
DELTA    1.89999999 sec
TD0      1

```

```

===== CHANNEL f1 =====
NUC1     13C
P1       8.50 usec
PL1     -2.60 dB
SFO1    100.6228298 MHz

```

```

===== CHANNEL f2 =====
CPDPRG2  waltz16
NUC2     1H
PCPD2    80.00 usec
PL2     -1.50 dB
PL12    17.50 dB
PL13    17.50 dB
SFO2    400.1316005 MHz

```

```

F2 - Processing parameters
SI       32768
SF       100.6127690 MHz
WDW      EM
SSB      0
LB       1.00 Hz
GB       0
PC       1.40

```

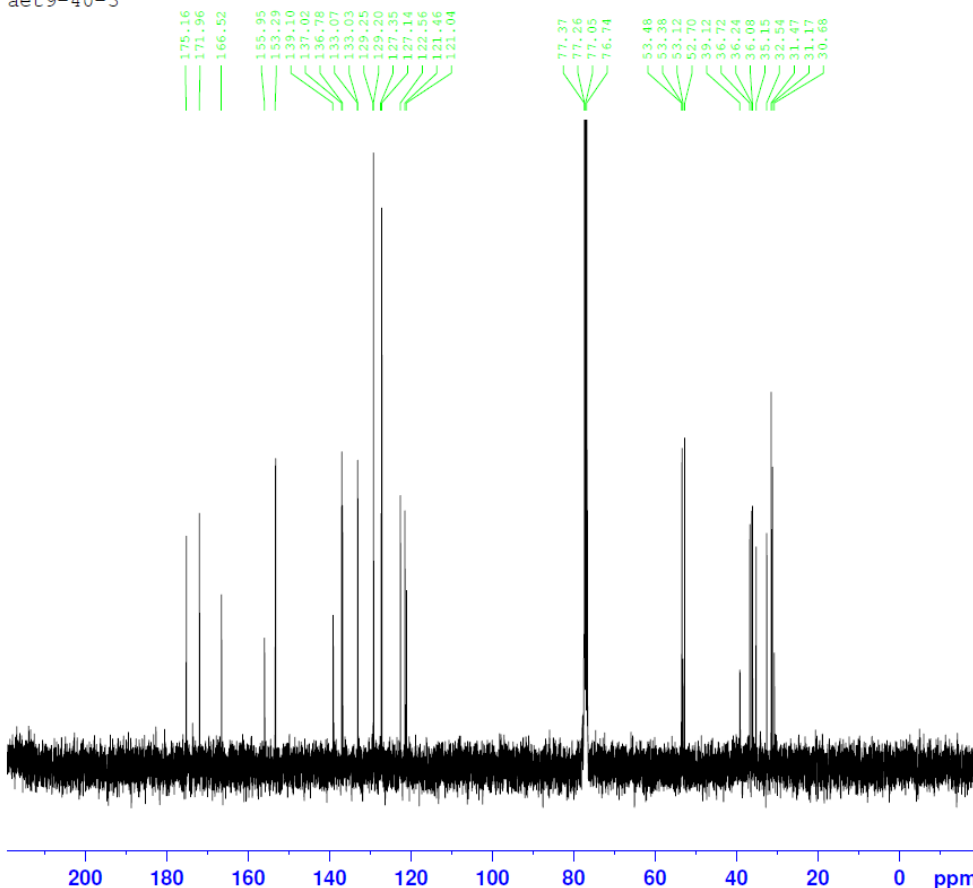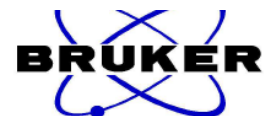

```

Current Data Parameters
NAME      aet9-40-3
EXPNO    12
PROCNO   1

```

```

F2 - Acquisition Parameters
Date_    20130225
Time     20.38
INSTRUM  DPX400
PROBHD   5 mm QNP 1H/13
PULPROG  deptq_135
TD       65536
SOLVENT  CDC13
NS       512
DS       4
SWH      23980.814 Hz
FIDRES   0.365918 Hz
AQ       1.3664756 sec
RG       18390.4
DW       20.850 usec
DE       6.00 usec
TE       293.2 K
CNST2    145.0000000
D1       2.00000000 sec
d2       0.00344828 sec
D11      0.03000000 sec
DELTA    0.00001082 sec

```

```

===== CHANNEL f1 =====
NUC1     13C
P1       8.50 usec
P2       17.00 usec
PL1     -2.60 dB
SFO1    100.6228300 MHz

```

```

===== CHANNEL f2 =====
CPDPRG2  waltz16
NUC2     1H
P3       10.00 usec
P4       20.00 usec
PCPD2    80.00 usec
PL2     -1.50 dB
PL12    17.50 dB
SFO2    400.1316000 MHz

```

```

F2 - Processing parameters
SI       32768
SF       100.6127690 MHz
WDW      EM
SSB      0
LB       1.00 Hz
GB       0
PC       1.40

```

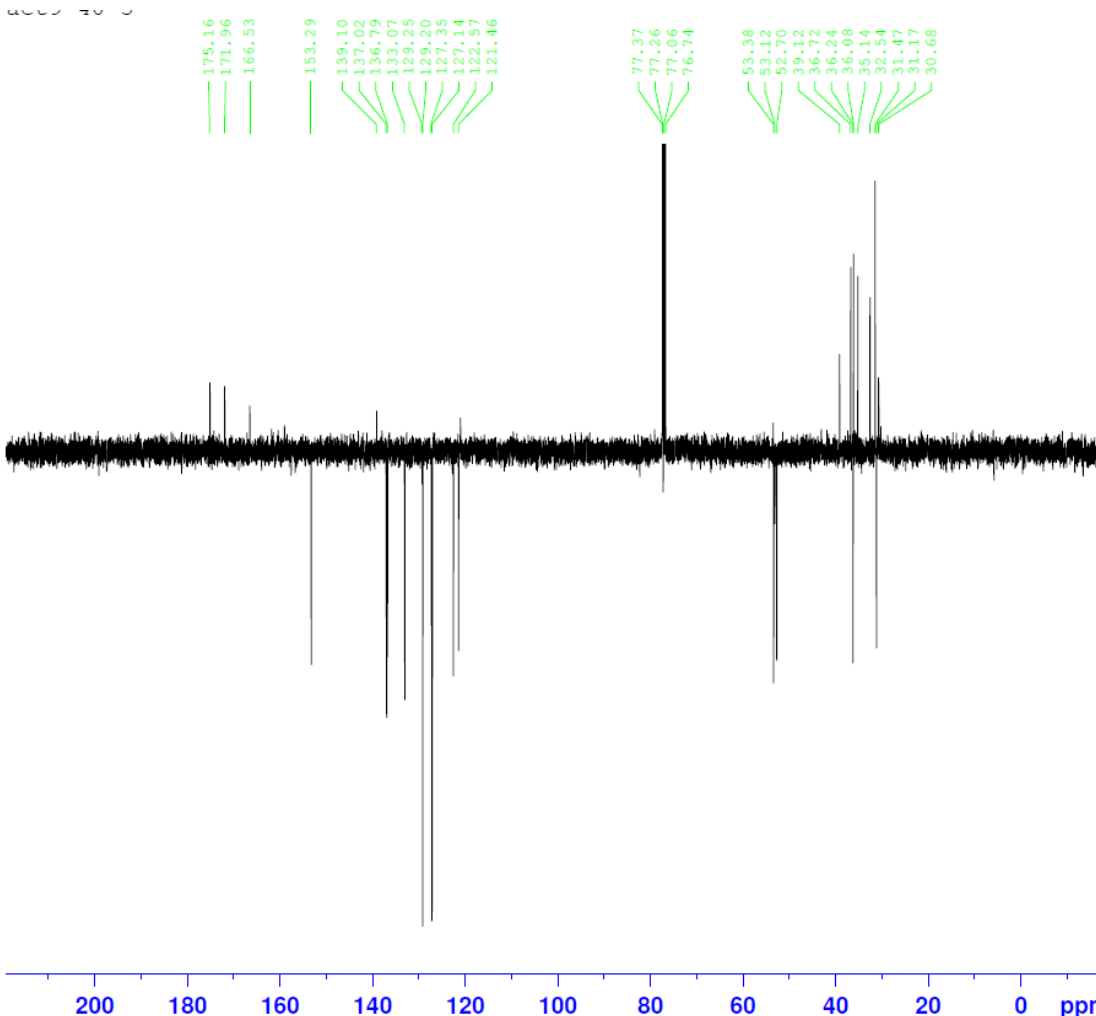



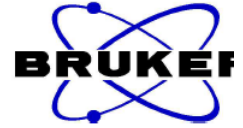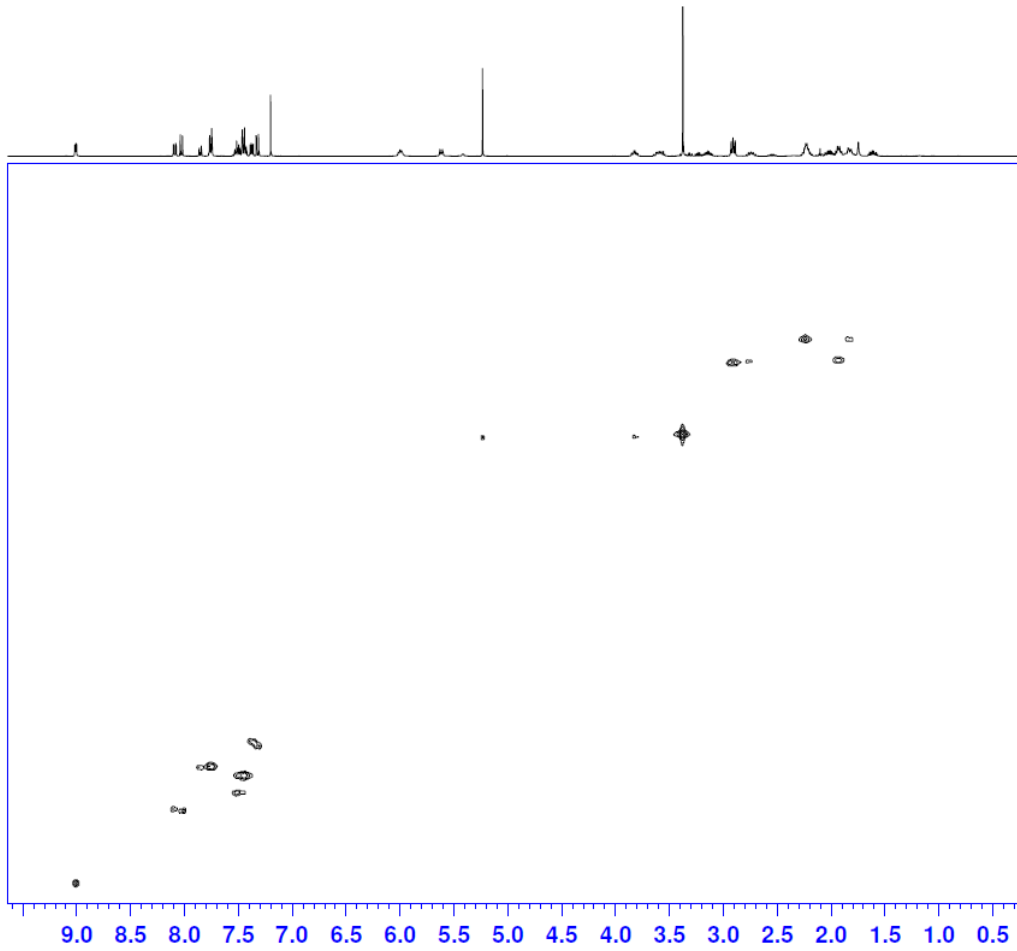

```

Current Data Parameters
NAME      aet9-40-3
EXPNO     14
PROCNO    1

F2 - Acquisition Parameters
Date_     20130225
Time      20.59
INSTRUM   DPK400
PROBHD    5 mm QNP 1H/13
PULPROG   zgpg30
TD         1024
SOLVENT   CDCl3
NS         4
DS         16
SWH        3765.060 Hz
FIDRES     3.676817 Hz
AQ         0.1360372 sec
RG         5782.6
DW         132.800 usec
DE         6.00 usec
TE         292.2 K
CNST2     145.0000000
d0         0.0000000 sec
d1         1.49078405 sec
d2         0.00344828 sec
d12        0.00002000 sec
d13        0.00000400 sec
d16        0.00020000 sec
DELTA1    0.00222428 sec
INO        0.00000000 sec

===== CHANNEL f1 =====
NUC1       1H
P1         10.00 usec
P2         20.00 usec
PL1        -1.50 dB
SFO1       400.1320094 MHz

===== CHANNEL F2 =====
CPDPRG2   gspg
NUC2       13C
P3         8.00 usec
PCPD2     74.00 usec
PL2        -3.00 dB
PL12       18.00 dB
SFO2       100.6203140 MHz

===== GRADIENT CHANNEL =====
GFNAM1     SINE.100
GFNAM2     SINE.100
GFNAM3     SINE.100
GPZ1       50.00 %
GPZ2       30.00 %
GPZ3       40.10 %
P16        1000.00 usec

F1 - Acquisition parameters
ND0        2
TD         128
SFO1       100.6203 MHz
FIDRES     130.208328 Hz
SW         145.439 ppm
Fsmode     QF

F2 - Processing parameters
SI         1024
SF         400.1300336 MHz
WFW        QSINE
SBB        2
LB         0.00 Hz
GB         0
PC         1.40

F1 - Processing parameters
SI         1024
MC2        QF
SF         100.6127690 MHz
WFW        QSINE
SBB        2
LB         0.00 Hz
GB         0

```

Methyl (S)-4-((1*r*\*,3*R*\*)-3-(2-(1,8-naphthyridin-2-yl)ethyl)cyclobutane-1-carboxamido)-2-(2,4,6-

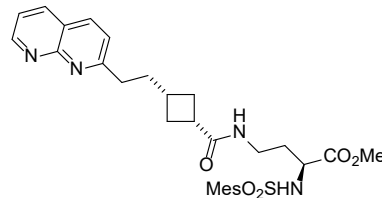

trimethylphenylsulfonamido)butanoate [Compound 20]

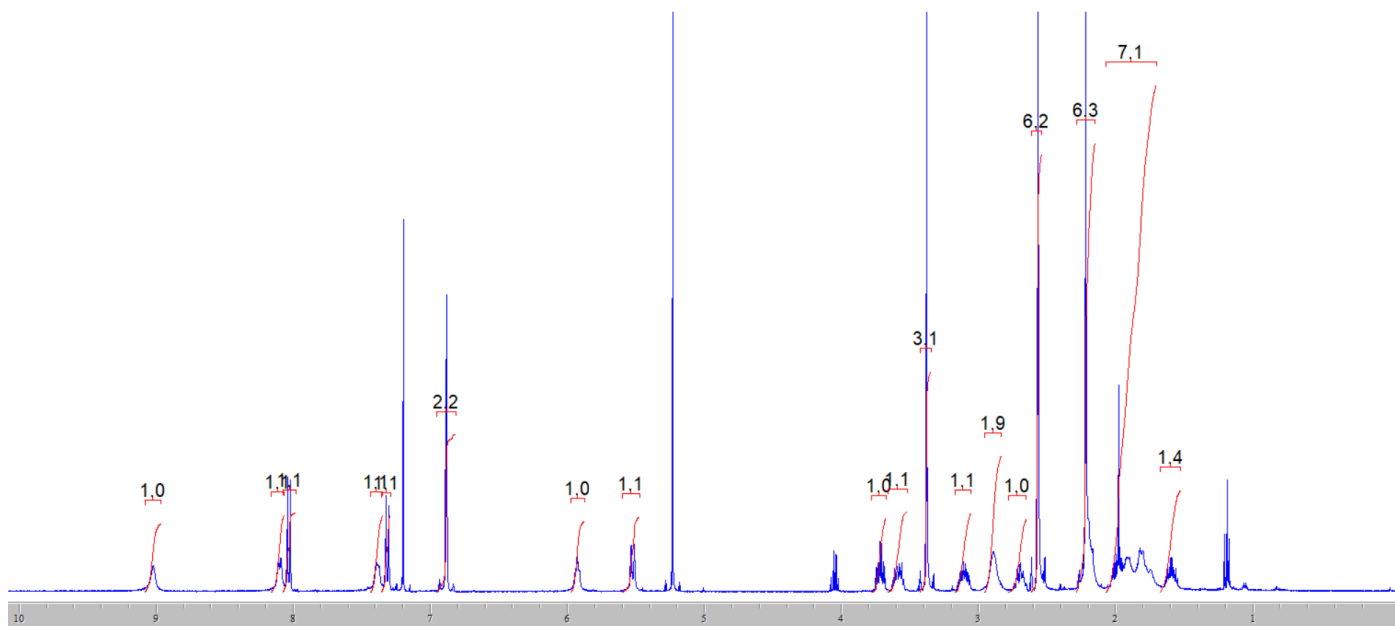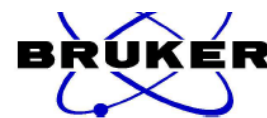

Current Data Parameters  
 NAME aet9-19-1  
 EXPNO 12  
 PROCNO 1

F2 - Acquisition Parameters  
 Date\_ 20121031  
 Time 19.04  
 INSTRUM DPX400  
 PROBHD 5 mm QNP 1H/13  
 PULPROG cosygmfzf  
 TD 2048  
 SOLVENT CDCl3  
 NS 4  
 DS 8  
 SWH 3810.976 Hz  
 FIDRES 1.860828 Hz  
 AQ 0.2687476 sec  
 RG 5792.6  
 DW 131.200 usec  
 DE 6.00 usec  
 TE 292.2 K  
 D0 0.00000300 sec  
 D1 1.92340505 sec  
 d13 0.00000400 sec  
 D16 0.00020000 sec  
 IN0 0.00026240 sec

CHANNEL f1  
 NUC1 1H  
 P1 10.00 usec  
 PL1 -1.50 dB  
 SFO1 400.1320160 MHz

GRADIENT CHANNEL  
 GPNAM1 SINE.100  
 GPNAM2 SINE.100  
 GPNAM3 SINE.100  
 GPZ1 16.00 %  
 GPZ2 12.00 %  
 GPZ3 40.00 %  
 P16 1000.00 usec

F1 - Acquisition parameters  
 ND0 1  
 TD 128  
 SFO1 400.132 MHz  
 FIDRES 29.773247 Hz  
 SW 9.524 ppm  
 FxMODE QF

F2 - Processing parameters  
 SI 1024  
 SF 400.1300337 MHz  
 WDW SINE  
 SSB 0  
 LB 0.00 Hz  
 GB 0  
 PC 1.40

F1 - Processing parameters  
 SI 1024  
 MC2 QF  
 SF 400.1300337 MHz  
 WDW SINE  
 SSB 0  
 LB 0.00 Hz  
 GB 0

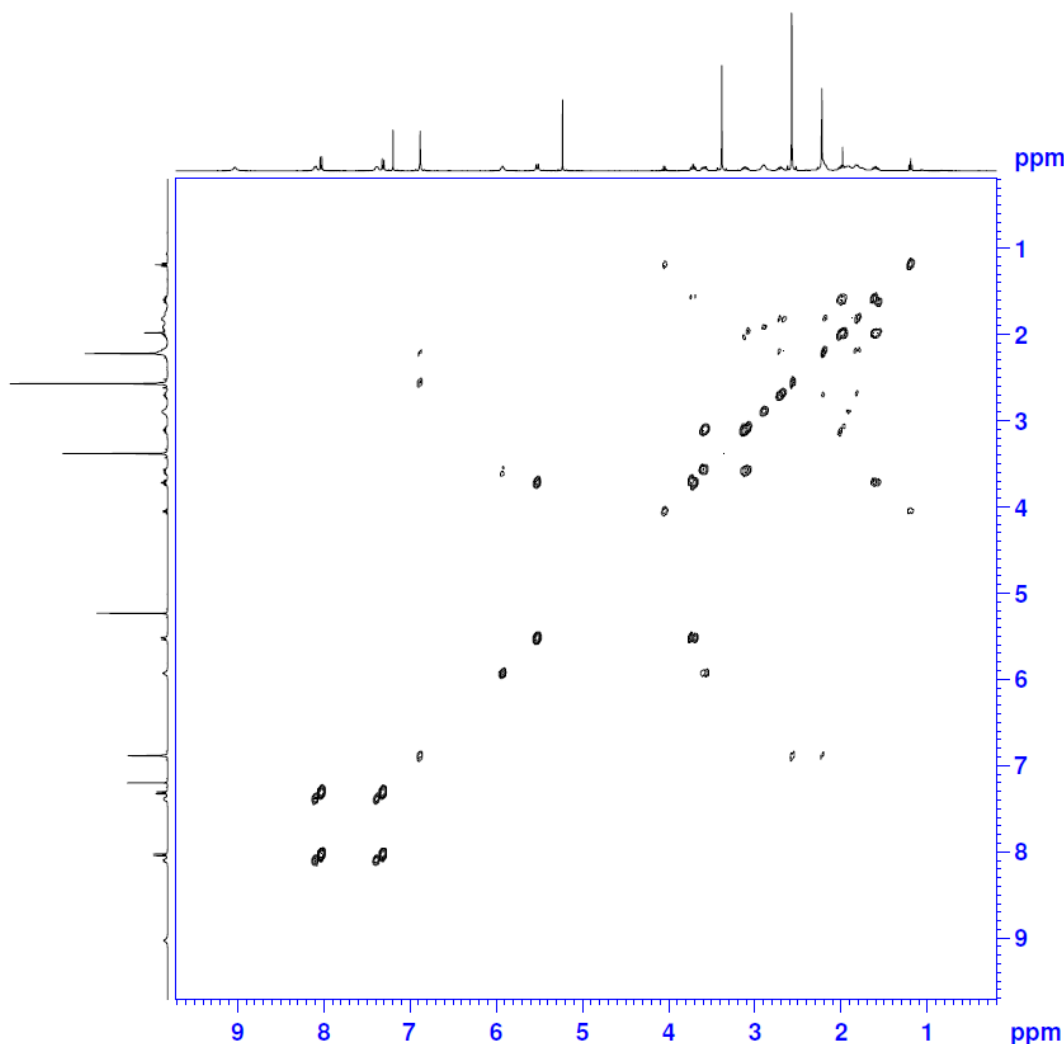

aet9-19-1

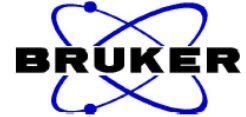

Current Data Parameters  
NAME aet9-19-1  
EXPNO 11  
PROCNO 1

F2 - Acquisition Parameters  
Date\_ 20121031  
Time 19.03  
INSTRUM DPX400  
PROBHD 5 mm QNP 1H/13  
PULPROG zgpg30  
TD 65536  
SOLVENT CDCl3  
NS 1024  
DS 4  
SWH 23980.814 Hz  
FIDRES 0.365918 Hz  
AQ 1.3664756 sec  
RG 812.7  
DW 20.850 usec  
DE 6.00 usec  
TE 292.2 K  
D1 2.00000000 sec  
d11 0.03000000 sec  
DELTA 1.89999998 sec  
TD0 1

===== CHANNEL f1 =====  
NUC1 13C  
P1 8.50 usec  
PL1 -2.60 dB  
SFO1 100.6228298 MHz

===== CHANNEL f2 =====  
CPDPRG2 waltz16  
NUC2 1H  
PCPD2 80.00 usec  
PL2 -1.50 dB  
PL12 17.50 dB  
PL13 17.50 dB  
SFO2 400.1316005 MHz

F2 - Processing parameters  
SI 32768  
SF 100.6127690 MHz  
WDW EM  
SSB 0  
LB 1.00 Hz  
GB 0  
PC 1.40

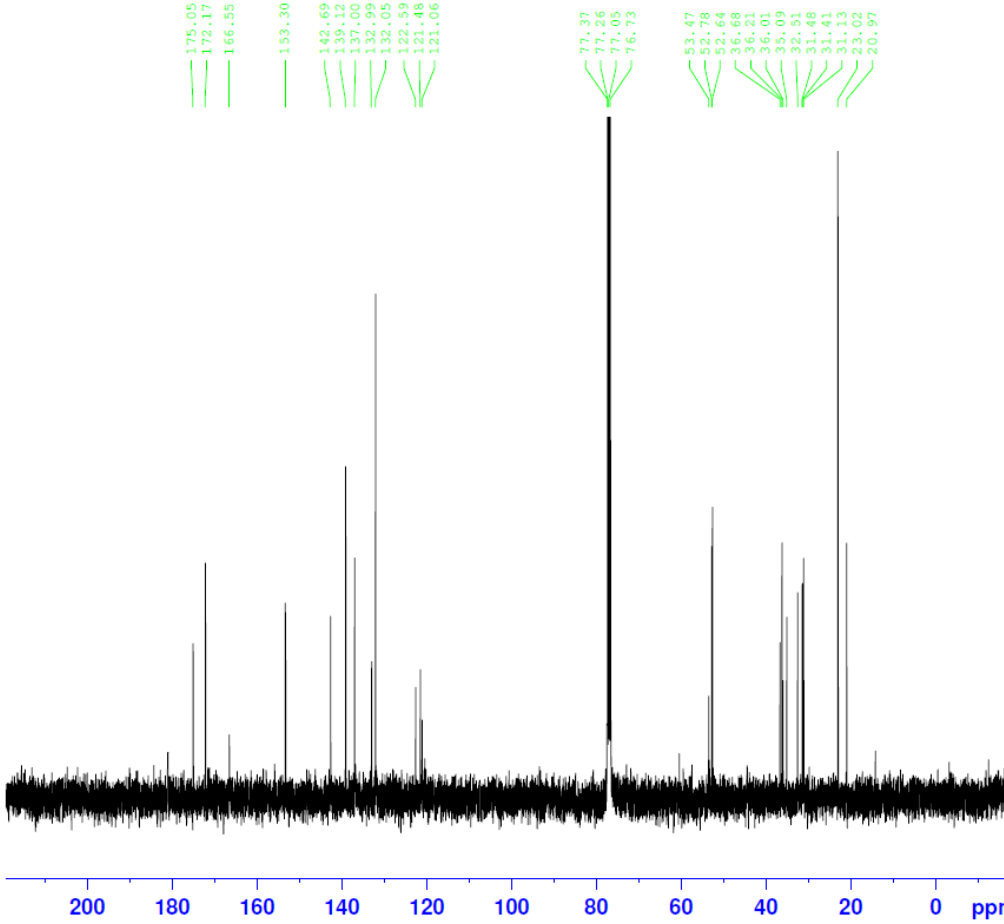

aet9-19-1

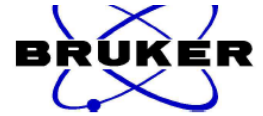

Current Data Parameters  
NAME aet9-19-1  
EXPNO 13  
PROCNO 1

F2 - Acquisition Parameters  
Date\_ 20121031  
Time 19.53  
INSTRUM DPX400  
PROBHD 5 mm QNP 1H/13  
PULPROG deptq\_135  
TD 65536  
SOLVENT CDCl3  
NS 512  
DS 4  
SWH 23980.814 Hz  
FIDRES 0.365918 Hz  
AQ 1.3664756 sec  
RG 11585.2  
DW 20.850 usec  
DE 6.00 usec  
TE 292.2 K  
CNST2 145.0000000  
D1 2.00000000 sec  
d2 0.00344828 sec  
D11 0.03000000 sec  
DELTA 0.00001082 sec

===== CHANNEL f1 =====  
NUC1 13C  
P1 8.50 usec  
P2 17.00 usec  
PL1 -2.60 dB  
SFO1 100.6228300 MHz

===== CHANNEL f2 =====  
CPDPRG2 waltz16  
NUC2 1H  
P3 10.00 usec  
P4 20.00 usec  
PCPD2 80.00 usec  
PL2 -1.50 dB  
PL12 17.50 dB  
SFO2 400.1316000 MHz

F2 - Processing parameters  
SI 32768  
SF 100.6127690 MHz  
WDW EM  
SSB 0  
LB 1.00 Hz  
GB 0  
PC 1.40

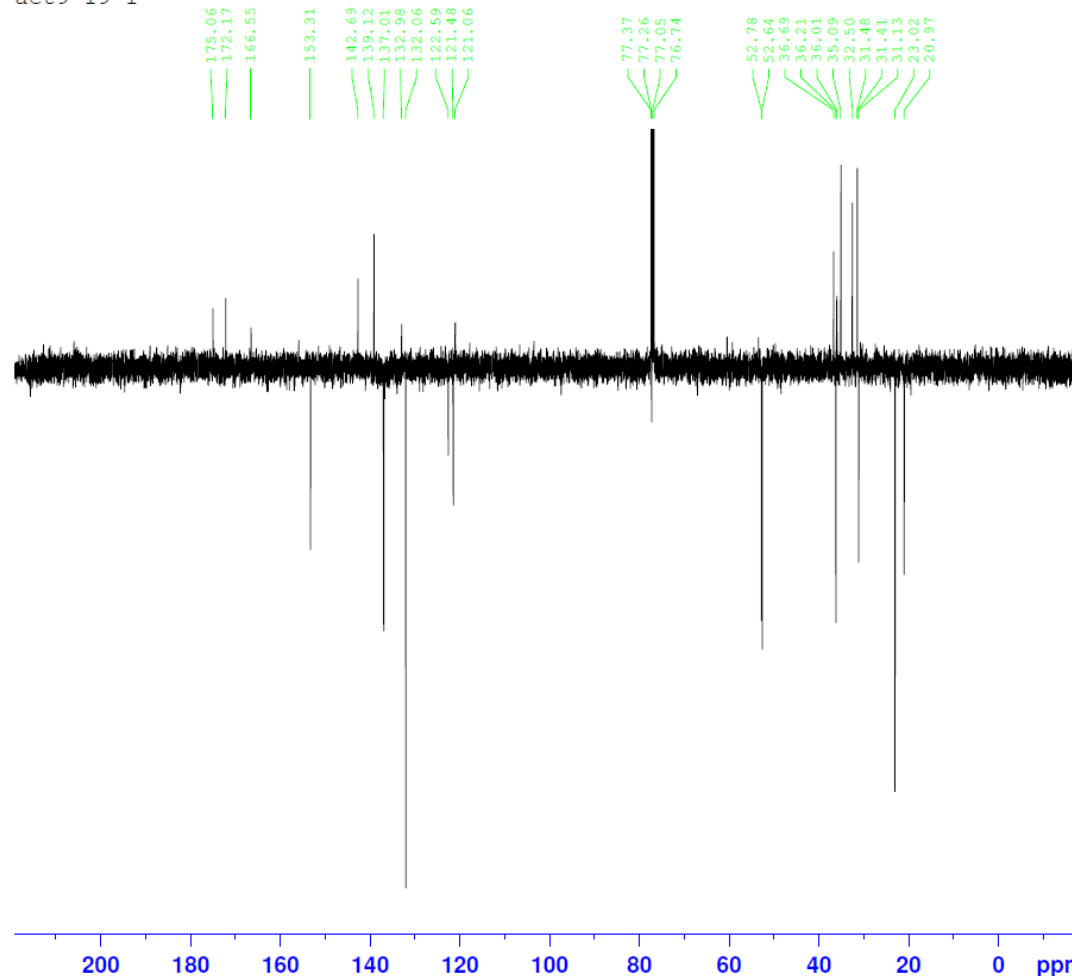

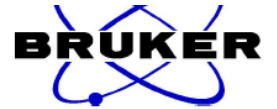

Current Data Parameters  
NAME sec9-19-1  
EXPNO 14  
PROCNO 1

F2 - Acquisition Parameters  
Date\_ 20121031  
Time 19.54

INSTRUM DPK400  
PROBHD 5 mm QNP 1H/13  
PULPROG hmqcmezf  
TD 1024  
SOLVENT CDCl3

NS 4  
DS 16  
SWH 3810.976 Hz  
FIDRES 3.721656 Hz

AQ 0.1343988 sec  
RG 10321.3  
DW 131.200 usec  
DE 6.00 usec

TE 292.2 K  
CNS12 145.000000 sec  
d0 0.0000300 sec

D1 1.49283195 sec  
d2 0.0034828 sec  
d12 0.0000200 sec

d13 0.0000400 sec  
D16 0.0002000 sec  
DELTA1 0.0022428 sec  
INO 0.0000300 sec

==== CHANNEL f1 =====  
NUC1 1H  
P1 10.00 usec  
PC 20.00 usec

==== CHANNEL f2 =====  
CPDPRG2 gcp  
NUC2 13C  
P3 8.00 usec

PCPD2 74.00 usec  
PL2 -3.00 dB  
PL12 18.00 dB  
SFO2 100.6203140 MHz

==== GRADIENT CHANNEL =====  
GPNAM1 SINE.100  
GPNAM2 SINE.100  
GPNAM3 SINE.100

GPZ1 50.00 %  
GPZ2 30.00 %  
GPZ3 40.10 %  
P16 1000.00 usec

F1 - Acquisition parameters  
ND0 2  
TD 128  
SFO1 100.6203 MHz  
FIDRES 130.208328 Hz

SW 165.639 ppm  
FrMODE QF  
F2 - Processing parameters  
SI 1024  
SF 400.1300337 MHz

WDW QSINE  
SSB 2  
LB 0.00 Hz  
GB 0  
PC 1.40

F1 - Processing parameters  
SI 1024  
MC2 QF  
SF 100.6127690 MHz  
WDW QSINE  
SSB 2  
LB 0.00 Hz  
GB 0

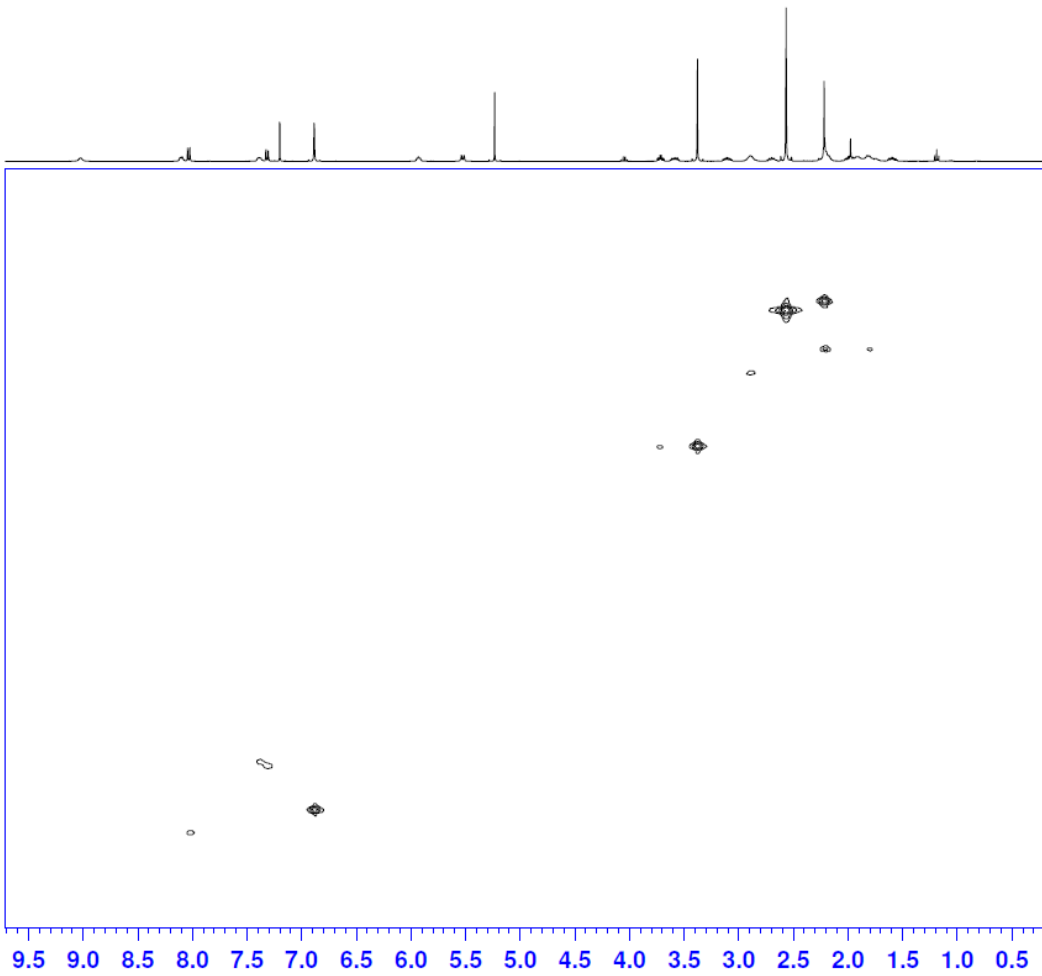

Methyl (S)-2-(phenylsulfonamido)-4-((1*S*\*,3*R*\*)-3-((5,6,7,8-tetrahydro-1,8-naphthyridin-2-

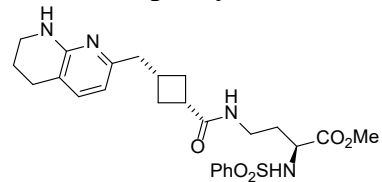

yl)methyl)cyclobutane-1-carboxamido)butanoate [Compound 21]

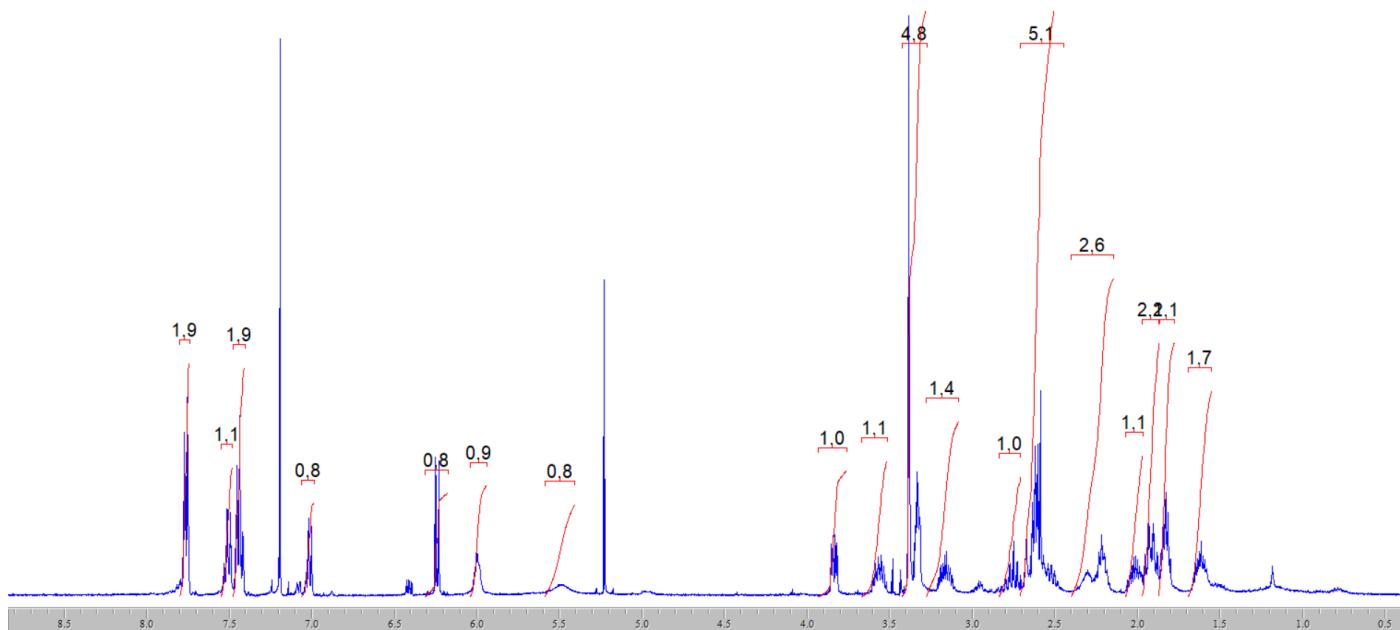

act9-3-1

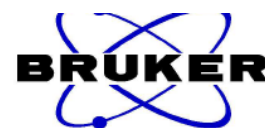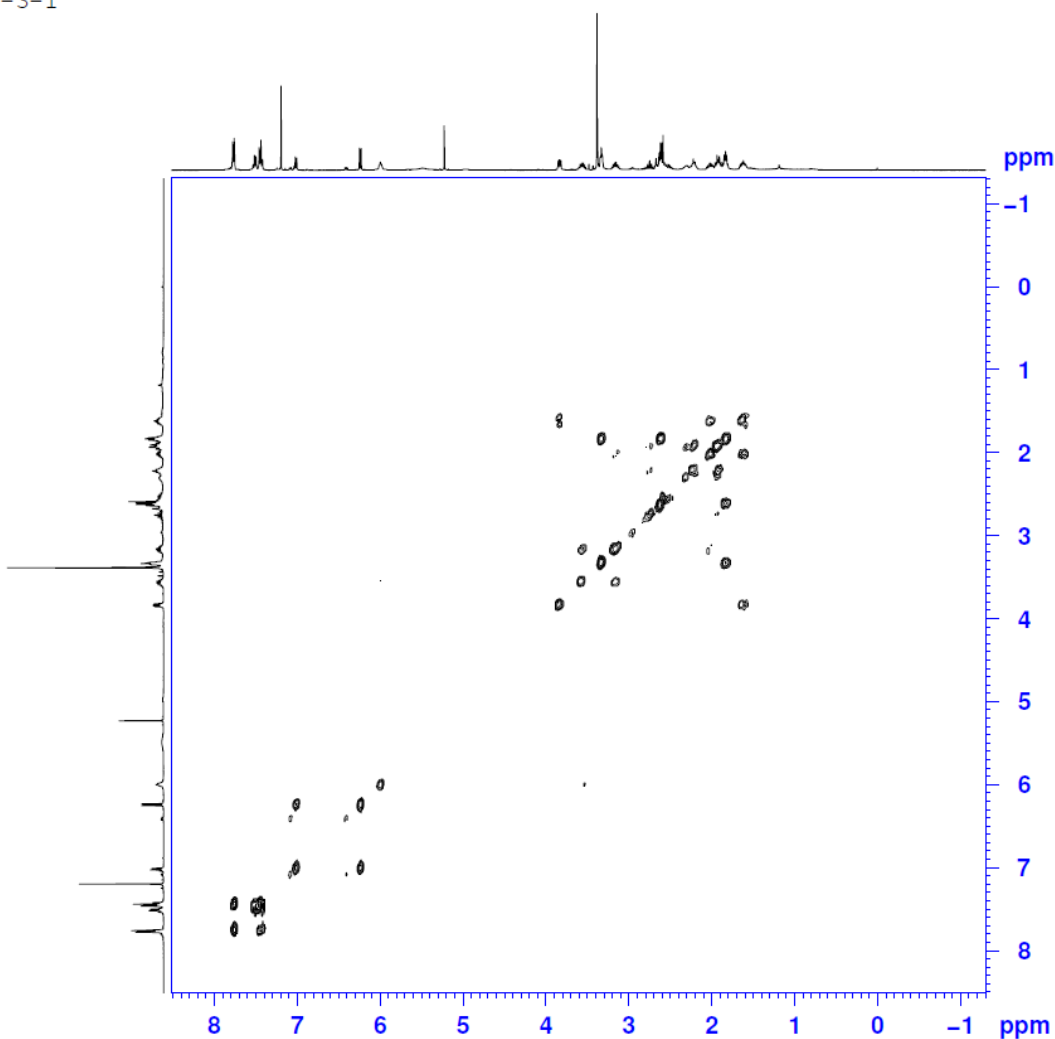

Current Data Parameters  
NAME act9-3-1  
EXPNO 13  
PROCNO 1

F2 - Acquisition Parameters  
Date\_ 20120925  
Time 22.30  
INSTRUM dpx400  
PROBHD 5 mm QNP 1H/13  
PULPROG cosygpmfqr  
ID 2048  
SOLVENT CDCl3  
NS 4  
DS 8  
SWH 3930.818 Hz  
FIDRES 1.919345 Hz  
AQ 0.2605556 sec  
RG 7298.2  
DW 127.200 usec  
DE 6.00 usec  
TE 298.2 K  
D0 0.00000300 sec  
D1 1.93159699 sec  
d13 0.00000400 sec  
D16 0.00020000 sec  
IN0 0.00025440 sec

----- CHANNEL f1 -----  
NUC1 1H  
P1 10.00 usec  
PL1 -1.50 dB  
SFO1 400.1314768 MHz

----- GRADIENT CHANNEL -----  
GPNAM1 SINE.100  
GPNAM2 SINE.100  
GPNAM3 SINE.100  
GPZ1 16.00 %  
GPZ2 12.00 %  
GPZ3 40.00 %  
P16 1000.00 usec

F1 - Acquisition parameters  
ND0 1  
ID 128  
SFO1 400.1315 MHz  
FIDRES 30.709513 Hz  
SW 9.824 ppm  
FMODE QF

F2 - Processing parameters  
SI 1024  
SF 400.1300356 MHz  
WDW SINE  
SSB 0  
LB 0.00 Hz  
GB 0  
PC 1.40

F1 - Processing parameters  
SI 1024  
MC2 QF  
SF 400.1300356 MHz  
WDW SINE  
SSB 0  
LB 0.00 Hz  
GB 0

aet9-3-1

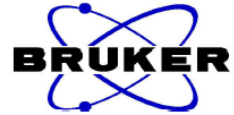

Current Data Parameters  
NAME aet9-3-1  
EXPNO 11  
PROCNO 1

F2 - Acquisition Parameters  
Date\_ 20120925  
Time 21.59  
INSTRUM DPX400  
PROBHD 5 mm QNP 1H/13  
PULPROG zgpg30  
TD 65536  
SOLVENT CDCl3  
NS 1024  
DS 4  
SWH 23980.814 Hz  
FIDRES 0.365918 Hz  
AQ 1.3664756 sec  
RG 912.3  
DW 20.850 usec  
DE 6.00 usec  
TE 298.2 K  
D1 2.00000000 sec  
d11 0.03000000 sec  
DELTA 1.89999998 sec  
TD0 1

===== CHANNEL f1 =====  
NUC1 13C  
P1 8.50 usec  
PL1 -2.60 dB  
SFO1 100.6228298 MHz

===== CHANNEL f2 =====  
CPDPRG2 waltz16  
NUC2 1H  
PCPD2 80.00 usec  
PL2 -1.50 dB  
PL12 17.50 dB  
PL13 17.50 dB  
SFO2 400.1316005 MHz

F2 - Processing parameters  
SI 32768  
SF 100.6127690 MHz  
WDW EM  
SSB 0  
LB 1.00 Hz  
GB 0  
PC 1.40

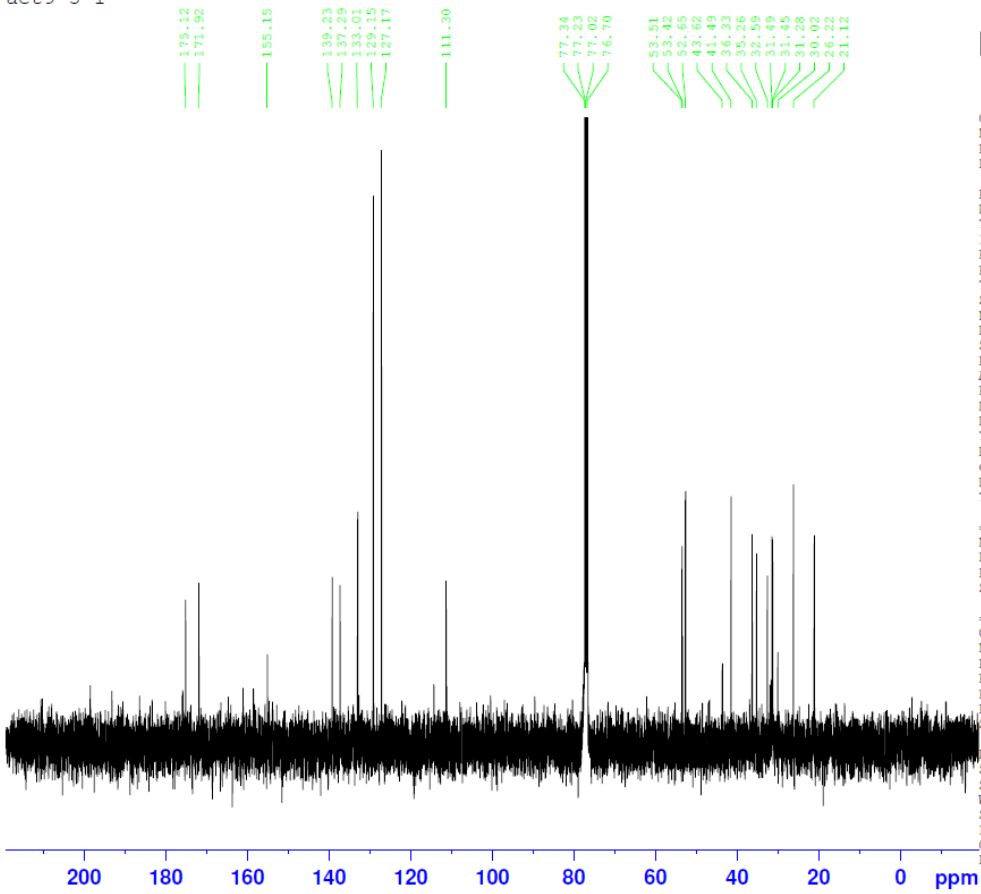

aet9-3-1

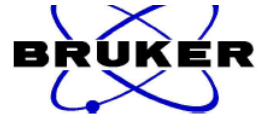

Current Data Parameters  
NAME aet9-3-1  
EXPNO 12  
PROCNO 1

F2 - Acquisition Parameters  
Date\_ 20120925  
Time 22.29  
INSTRUM DPX400  
PROBHD 5 mm QNP 1H/13  
PULPROG deptq\_135  
TD 65536  
SOLVENT CDCl3  
NS 512  
DS 4  
SWH 23980.814 Hz  
FIDRES 0.365918 Hz  
AQ 1.3664756 sec  
RG 16384  
DW 20.850 usec  
DE 6.00 usec  
TE 298.2 K  
CNST2 145.0000000  
D1 2.00000000 sec  
d2 0.00344828 sec  
D11 0.03000000 sec  
DELTA 0.00001082 sec

===== CHANNEL f1 =====  
NUC1 13C  
P1 8.50 usec  
P2 17.00 usec  
PL1 -2.60 dB  
SFO1 100.6228300 MHz

===== CHANNEL f2 =====  
CPDPRG2 waltz16  
NUC2 1H  
P3 10.00 usec  
P4 20.00 usec  
PCPD2 80.00 usec  
PL2 -1.50 dB  
PL12 17.50 dB  
SFO2 400.1316000 MHz

F2 - Processing parameters  
SI 32768  
SF 100.6127690 MHz  
WDW EM  
SSB 0  
LB 1.00 Hz  
GB 0  
PC 1.40

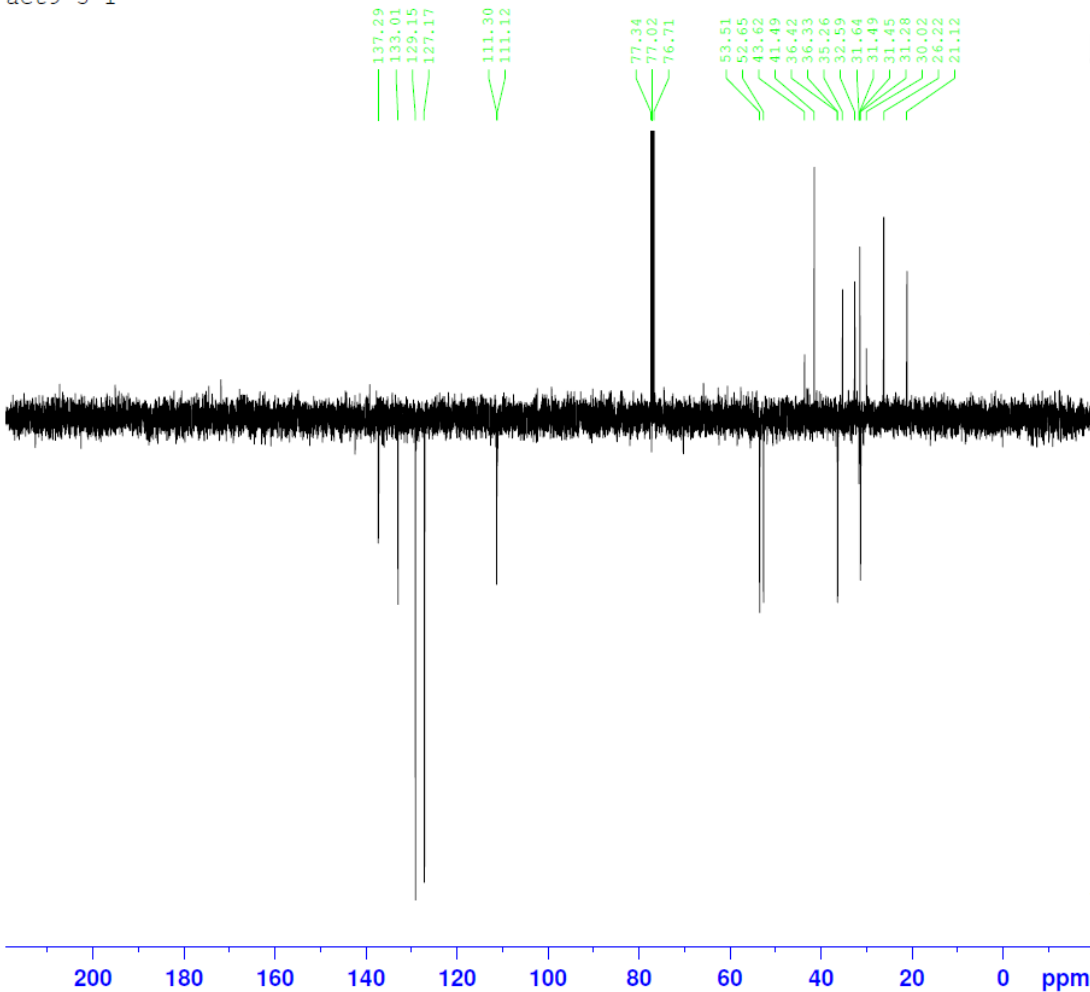

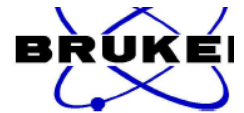

Current Data Parameters  
NAME act9-3-1  
EXPNO 14  
PROCNO 1

P2 - Acquisition Parameters  
Date\_ 20120925  
Time 22.50  
INSTRUM QNP140  
PROBHD 5 mm QNP 1H/13  
PULPROG hmqcpgpgf  
TD 1024  
SOLVENT CDCl3  
NS 4  
DS 16  
SWH 3930.818 Hz  
FIDRES 3.838689 Hz  
AQ 0.1303028 sec  
RG 7288.2  
DW 127.200 usec  
DE 6.00 usec  
TE 298.2 K  
CNST2 145.000000  
d0 0.0000300 sec  
d1 1.4969798 sec  
d2 0.00344828 sec  
d12 0.00002000 sec  
d13 0.00000400 sec  
d16 0.00020000 sec  
DELTA1 0.00222428 sec  
IND 0.00003000 sec

==== CHANNEL f1 =====  
NUC1 13C  
P1 10.00 usec  
p2 20.00 usec  
PL1 -1.50 dB  
SFO1 400.1314728 MHz  
==== CHANNEL f2 =====  
CPDPRG2 garp  
NUC2 13C  
P3 8.00 usec  
PCPD2 74.00 usec  
PL2 -3.00 dB  
PL12 18.00 dB  
SFO2 100.6203140 MHz

==== GRADIENT CHANNEL =====  
GPNAM1 SINE.100  
GPNAM2 SINE.100  
GPNAM3 SINE.100  
GPZ1 50.00 %  
GPZ2 30.00 %  
GPZ3 40.10 %  
P16 1000.00 usec

F1 - Acquisition parameters  
ND0 2  
TD 128  
SFO1 100.6203 MHz  
FIDRES 130.208328 Hz  
SW 155.639 ppm  
FMODE QF

P2 - Processing parameters  
SI 1024  
SF 400.1300356 MHz  
WFW QSINE  
SSB 2  
LB 0.00 Hz  
GB 0  
PC 1.40

F1 - Processing parameters  
SI 1024  
MC2 QF  
SF 100.6127690 MHz  
WFW QSINE  
SSB 2  
LB 0.00 Hz  
GB 0

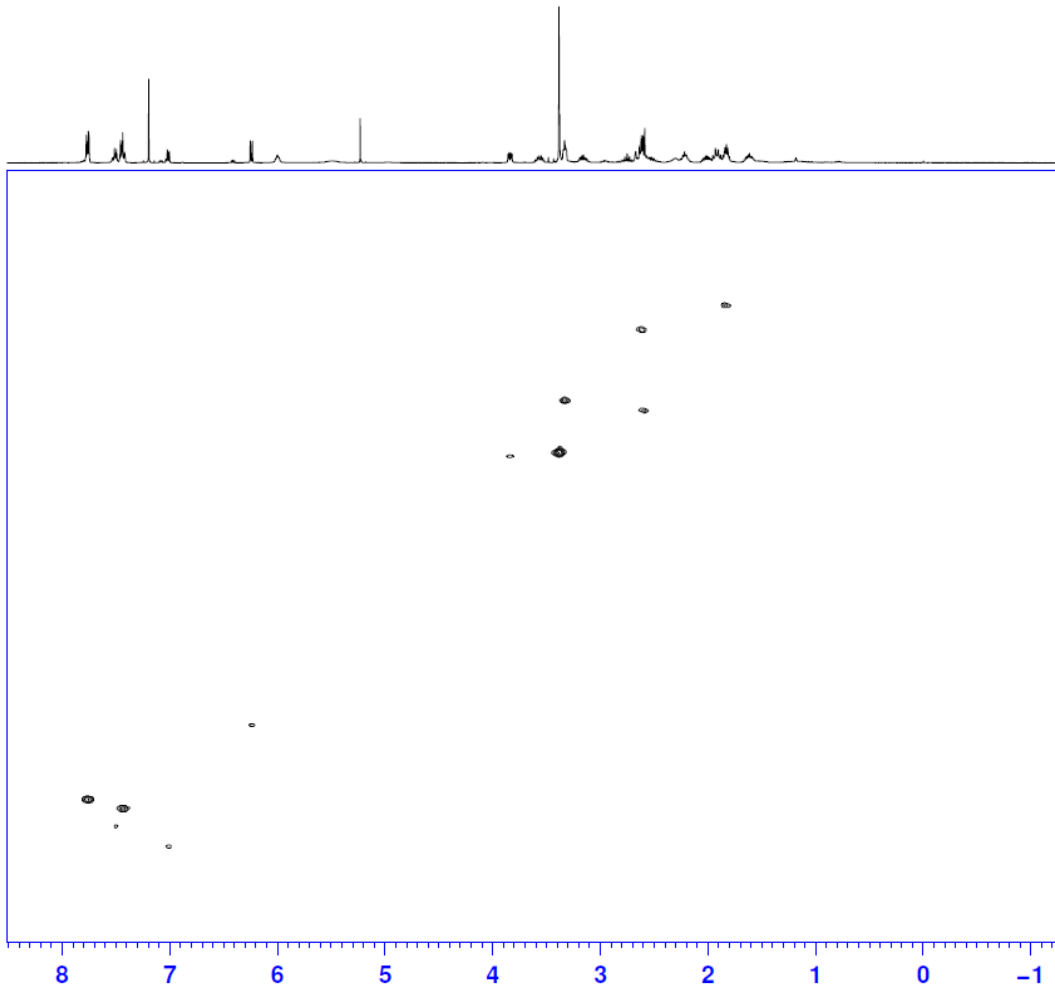

**Methyl (*S*)-4-((1*S*\*,3*R*\*)-3-((5,6,7,8-tetrahydro-1,8-naphthyridin-2-yl) methyl)cyclobutane-1-carboxamido)-2-(2,4,6-trimethylphenylsulfonamido)butanoate [Compound 22]**

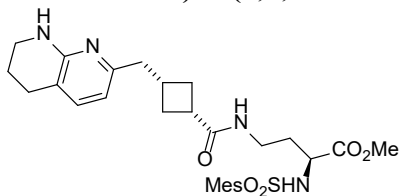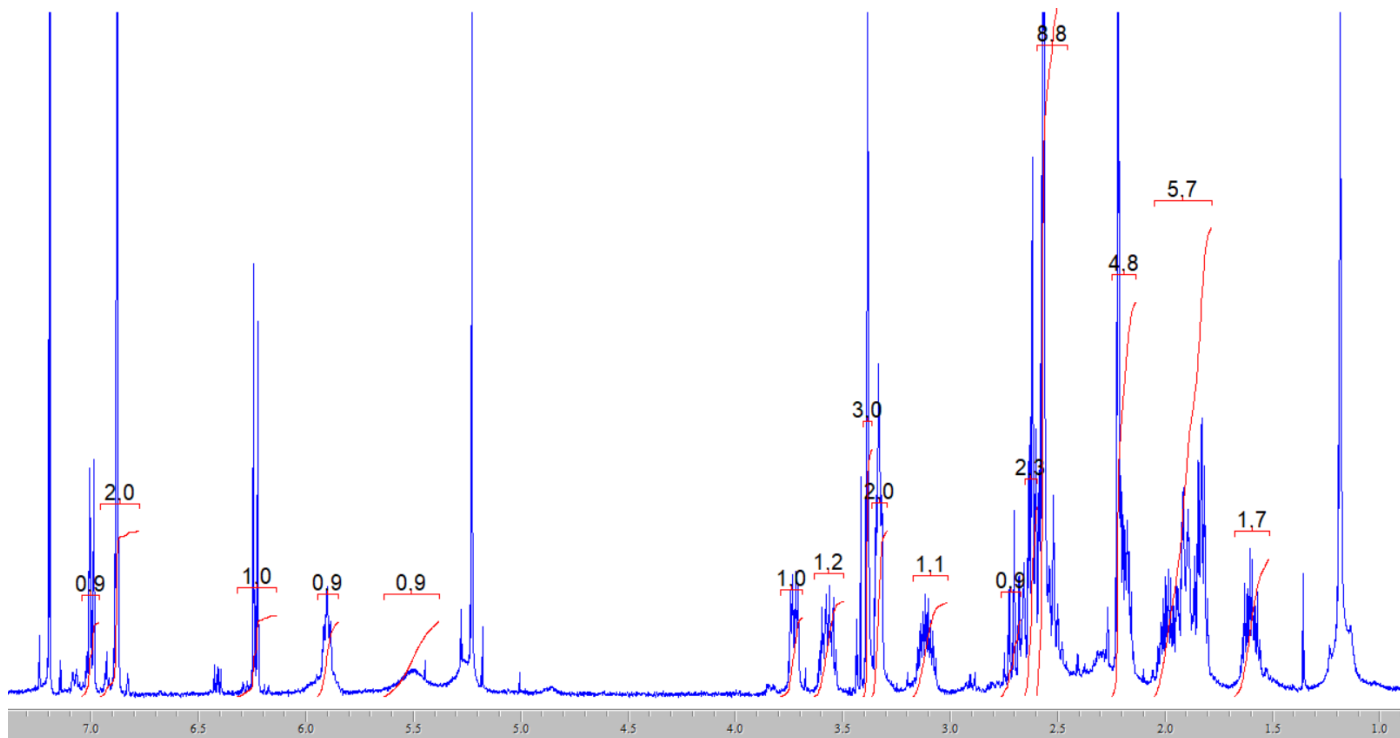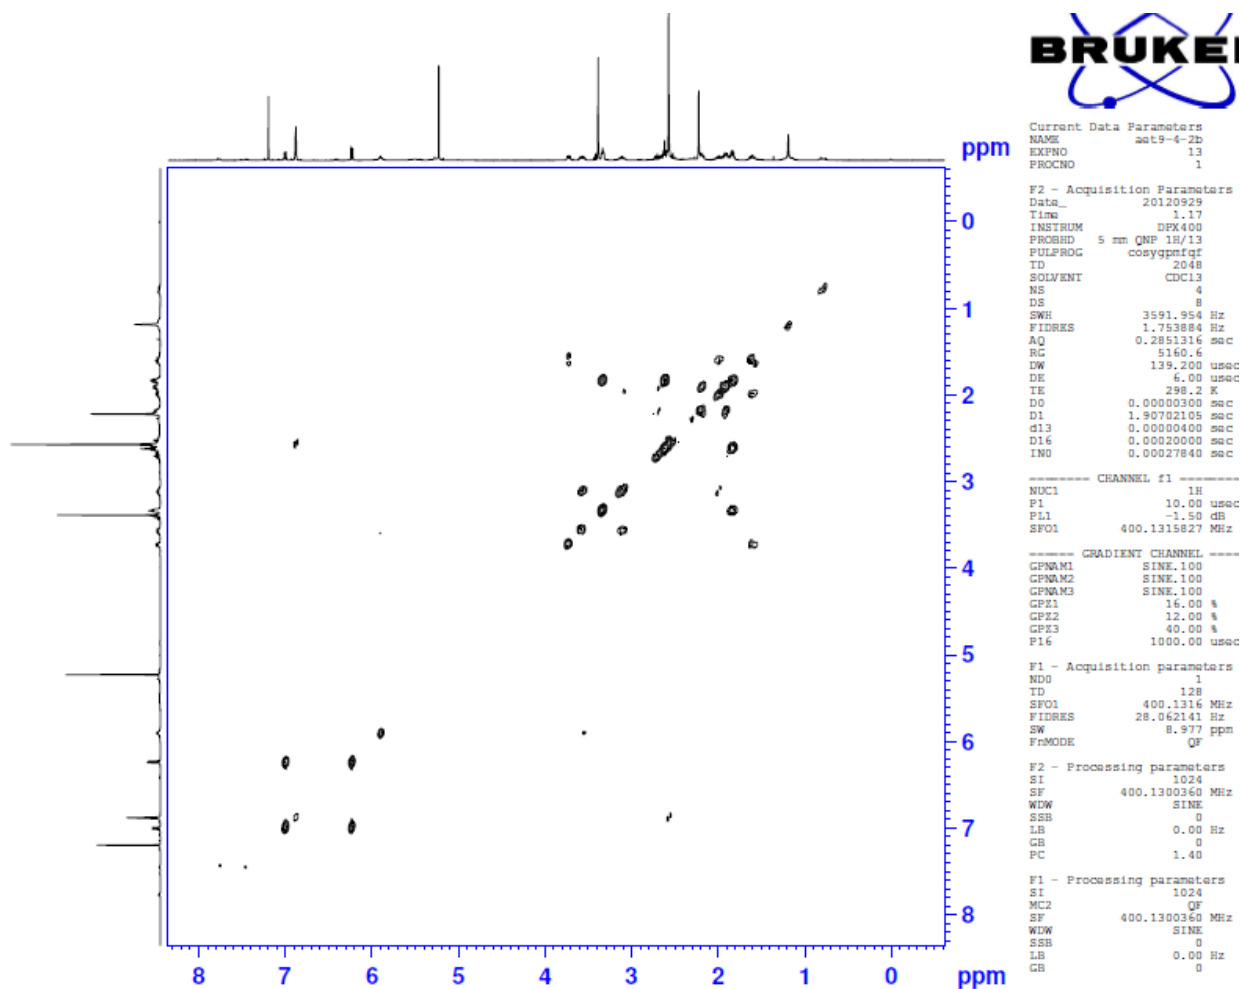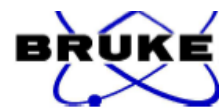

Current Data Parameters  
NAME act9-4-2b  
EXPNO 13  
PROCNO 1

F2 - Acquisition Parameters  
Data\_ 20120929  
Time 1.17  
INSTRUM DPK400  
PROBHD 5 mm QNP 1H/13  
PULPROG cosygprfgr  
TD 2048  
SOLVENT CDCl3  
NS 4  
DS 8  
SWH 3591.954 Hz  
FIDRES 1.753884 Hz  
AQ 0.2851316 sec  
RG 5140.6  
DW 139.200 usec  
DE 6.00 usec  
TE 298.2 K  
D0 0.00000300 sec  
D1 1.90702105 sec  
d13 0.00000400 sec  
D16 0.00020000 sec  
IN0 0.00027840 sec

----- CHANNEL f1 -----  
NUC1 1H  
P1 10.00 usec  
PL1 -1.50 dB  
SFO1 400.1315827 MHz

----- GRADIENT CHANNEL -----  
GPMAM1 SINE.100  
GPMAM2 SINE.100  
GPMAM3 SINE.100  
GPE1 16.00 %  
GPE2 12.00 %  
GPE3 40.00 %  
P16 1000.00 usec

F1 - Acquisition parameters  
ND0 1  
TD 128  
SFO1 400.1316 MHz  
FIDRES 28.062141 Hz  
SW 8.977 ppm  
FMODE QF

F2 - Processing parameters  
SI 1024  
SF 400.1300360 MHz  
WDW SINE  
SSB 0  
LB 0.00 Hz  
GB 0  
PC 1.40

F1 - Processing parameters  
SI 1024  
MC2 QF  
SF 400.1300360 MHz  
WDW SINE  
SSB 0  
LB 0.00 Hz  
GB 0



aet9-4-2b

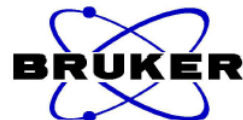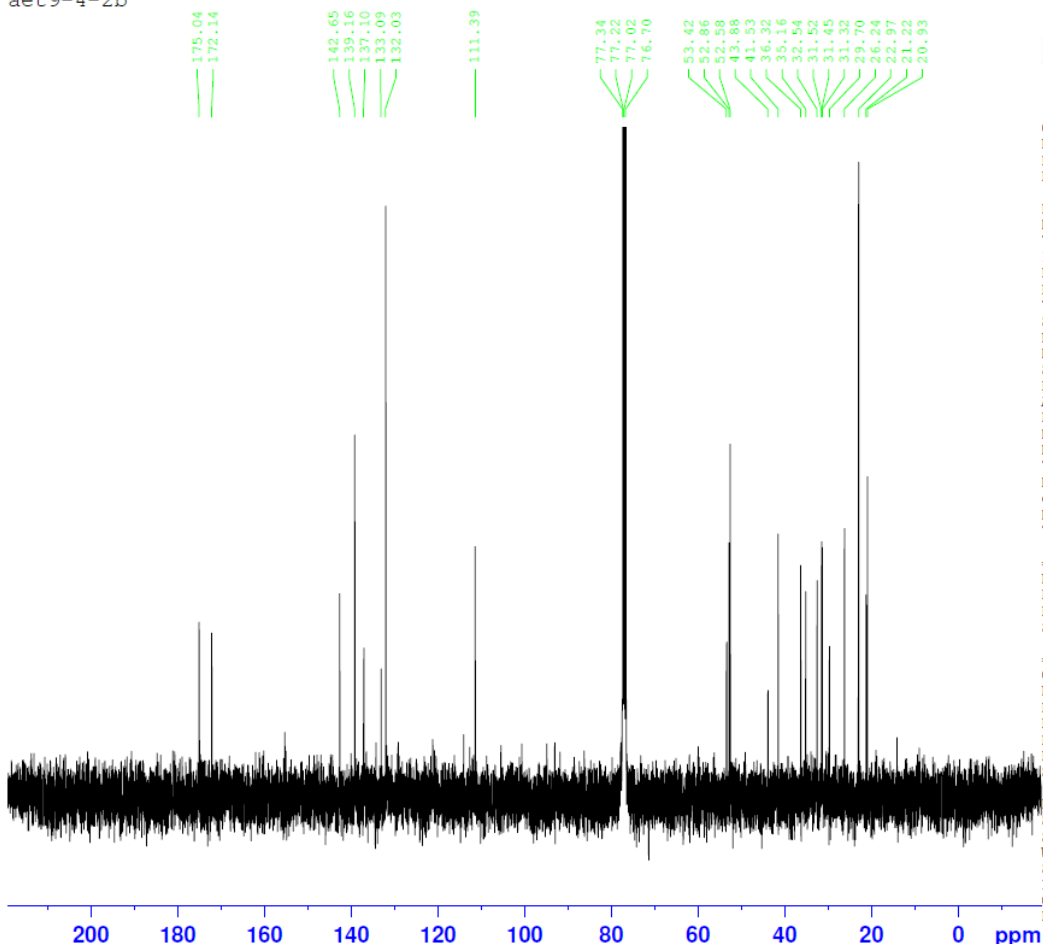

Current Data Parameters  
 NAME aet9-4-2b  
 EXPNO 11  
 PROCNO 1

F2 - Acquisition Parameters  
 Date\_ 20120929  
 Time 0.46  
 INSTRUM DPX400  
 PROBHD 5 mm QNP 1H/13  
 PULPROG zgpg30  
 TD 65536  
 SOLVENT CDCl3  
 NS 1024  
 DS 4  
 SWH 23980.814 Hz  
 FIDRES 0.365918 Hz  
 AQ 1.3664756 sec  
 RG 1149.4  
 DW 20.850 usec  
 DE 6.00 usec  
 TE 298.2 K  
 D1 2.00000000 sec  
 d11 0.03000000 sec  
 DELTA 1.89999998 sec  
 TD0 1

==== CHANNEL f1 =====  
 NUC1 13C  
 P1 8.50 usec  
 PL1 -2.60 dB  
 SFO1 100.6228298 MHz

==== CHANNEL f2 =====  
 CPDPRG2 waltz16  
 NUC2 1H  
 P2 80.00 usec  
 PL2 -1.50 dB  
 PL12 17.50 dB  
 PL13 17.50 dB  
 SFO2 400.1316005 MHz

F2 - Processing parameters  
 SI 32768  
 SF 100.6127690 MHz  
 WDW EM  
 SSB 0  
 LB 1.00 Hz  
 GB 0  
 PC 1.40

aet9-4-2b

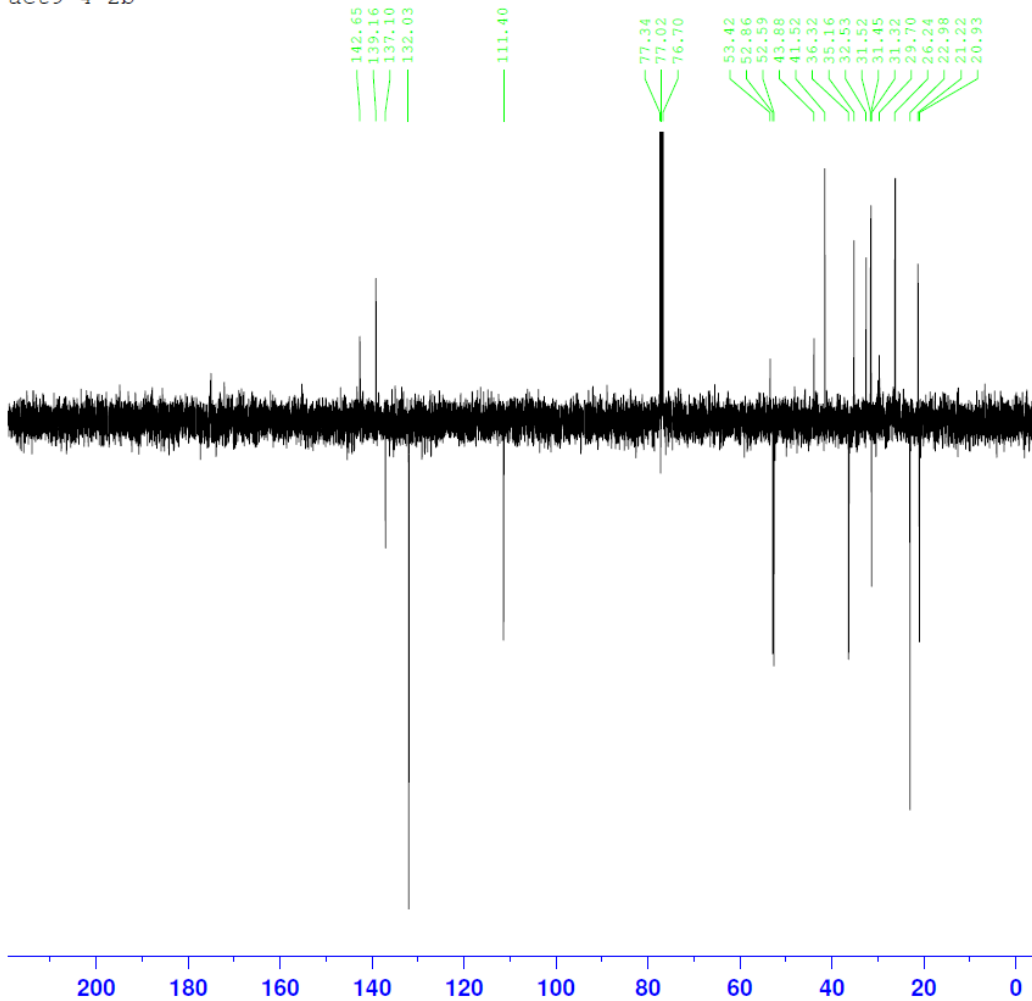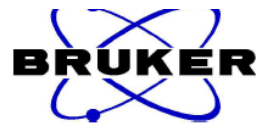

Current Data Parameters  
 NAME aet9-4-2b  
 EXPNO 12  
 PROCNO 1

F2 - Acquisition Parameters  
 Date\_ 20120929  
 Time 1.16  
 INSTRUM DPX400  
 PROBHD 5 mm QNP 1H/13  
 PULPROG deptg\_135  
 TD 65536  
 SOLVENT CDCl3  
 NS 512  
 DS 4  
 SWH 23980.814 Hz  
 FIDRES 0.365918 Hz  
 AQ 1.3664756 sec  
 RG 18390.4  
 DW 20.850 usec  
 DE 6.00 usec  
 TE 298.2 K  
 CNST2 145.0000000  
 D1 2.00000000 sec  
 d2 0.00344828 sec  
 D11 0.03000000 sec  
 DELTA 0.00001082 sec

==== CHANNEL f1 =====  
 NUC1 13C  
 P1 8.50 usec  
 P2 17.00 usec  
 PL1 -2.60 dB  
 SFO1 100.6228300 MHz

==== CHANNEL f2 =====  
 CPDPRG2 waltz16  
 NUC2 1H  
 P3 10.00 usec  
 P4 20.00 usec  
 PCPD2 80.00 usec  
 PL2 -1.50 dB  
 PL12 17.50 dB  
 SFO2 400.1316000 MHz

F2 - Processing parameters  
 SI 32768  
 SF 100.6127690 MHz  
 WDW EM  
 SSB 0  
 LB 1.00 Hz  
 GB 0  
 PC 1.40

Methyl (S)-2-(phenylsulfonamido)-4-((1*r*\*,3*R*\*)-3-(2-(5,6,7,8-tetrahydro-1,8-naphthyridin-2-

yl)ethyl)cyclobutane-1-carboxamido)butanoate [Compound 23]

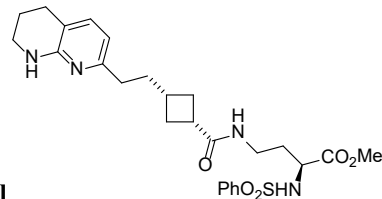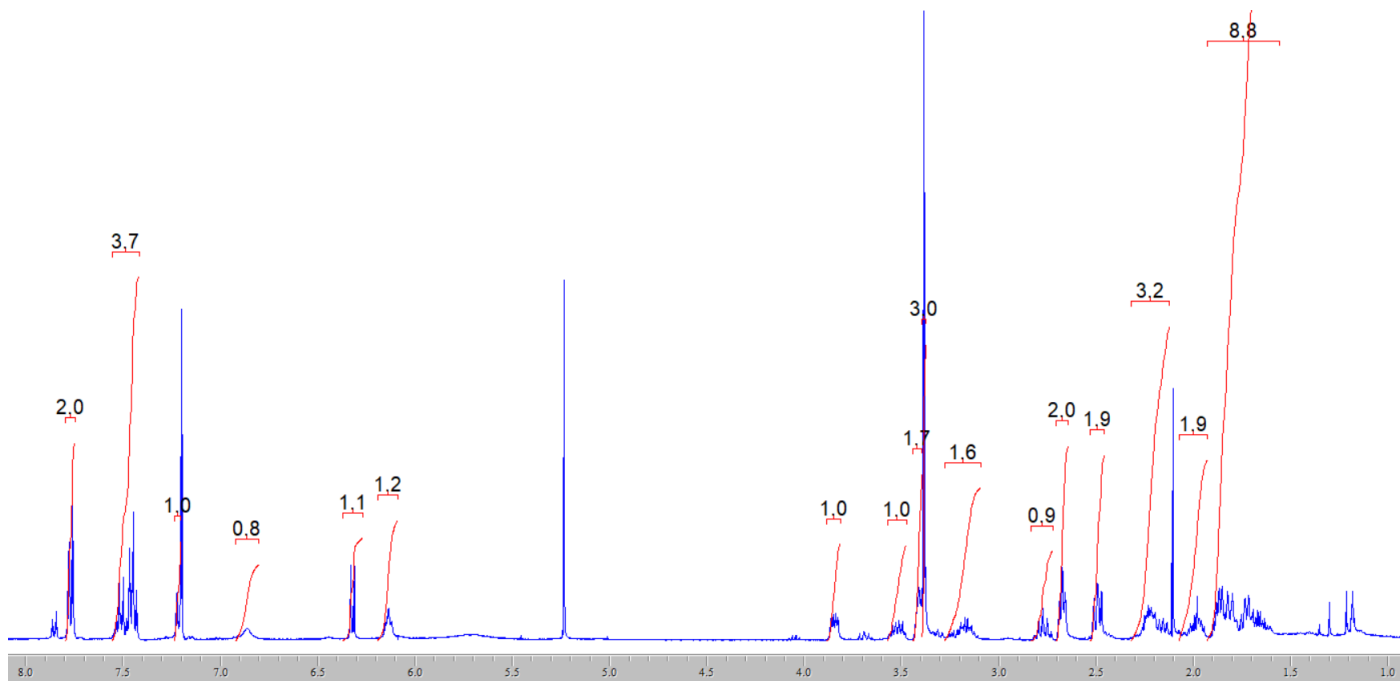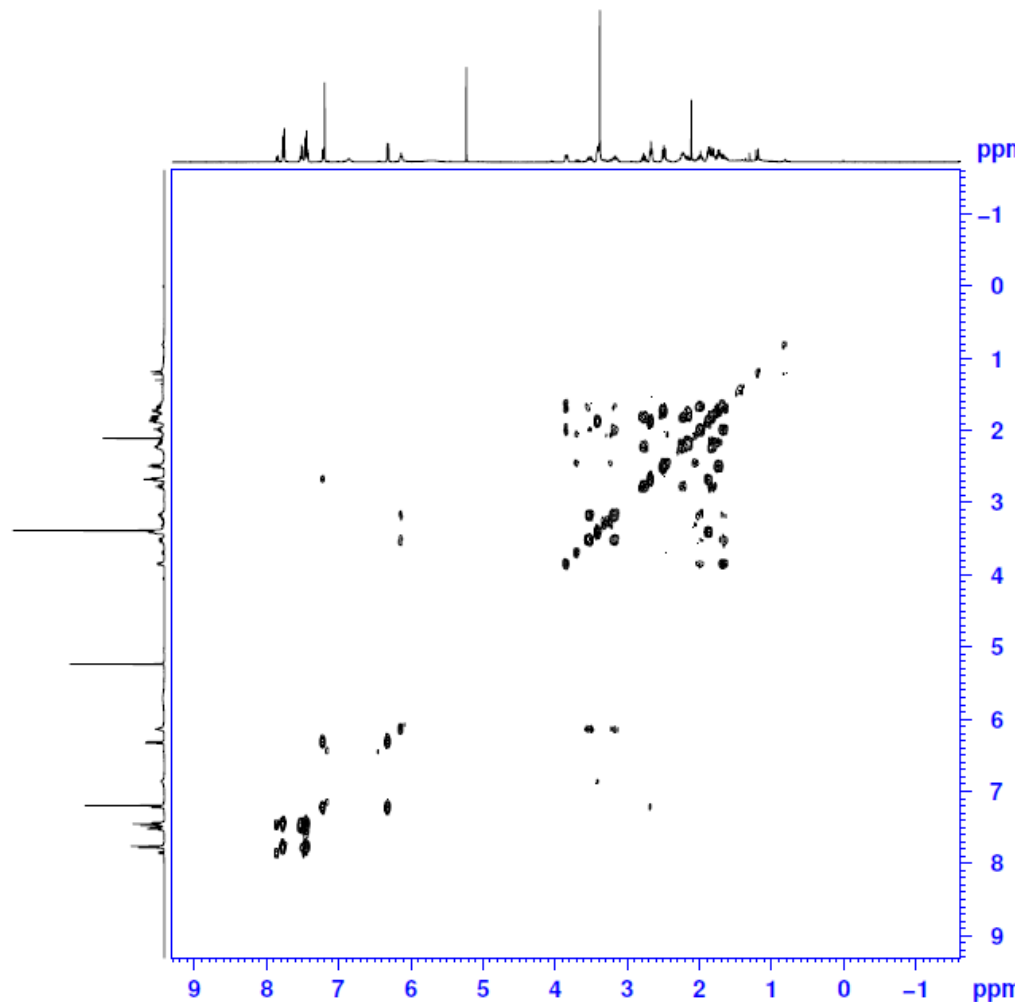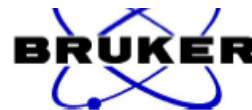

Current Data Parameters  
 NAME set9-41  
 EXPNO 13  
 PROCNO 1

F2 - Acquisition Parameters  
 Date\_ 20130228  
 Time 19.48  
 INSTRUM DFX400  
 PROBED 5 mm QNP 1H/13  
 PULPROG cosygprf2f  
 ID 2048  
 SOLVENT CDCl3  
 NS 4  
 DS 8  
 SWH 4370.629 Hz  
 FIDRES 2.134096 Hz  
 AQ 0.2343412 sec  
 RG 3251  
 LW 114.400 usec  
 DE 6.00 usec  
 TE 292.2 K  
 DO 0.00000300 sec  
 D1 1.95822096 sec  
 d13 0.00000400 sec  
 D16 0.00020000 sec  
 INO 0.00022880 sec

----- CHANNEL f1 -----  
 NUC1 1H  
 P1 10.00 usec  
 PL1 -1.50 dB  
 SFO1 400.1315728 MHz

----- GRADIENT CHANNEL -----  
 GPNAM1 SINK.100  
 GPNAM2 SINK.100  
 GPNAM3 SINK.100  
 GPE1 16.00 %  
 GPE2 12.00 %  
 GPE3 40.00 %  
 P16 1000.00 usec

F1 - Acquisition parameters  
 NDO 1  
 ID 128  
 SFO1 400.1316 MHz  
 FIDRES 34.145542 Hz  
 SW 10.923 ppm  
 FMODE QF

F2 - Processing parameters  
 SI 1024  
 SF 400.1300339 MHz  
 WDW SINE  
 SSB 0  
 LB 0.00 Hz  
 GB 0  
 PC 1.40

F1 - Processing parameters  
 SI 1024  
 MC2 QF  
 SF 400.1300339 MHz  
 WDW SINE  
 SSB 0  
 LB 0.00 Hz  
 GB 0

aet9-41

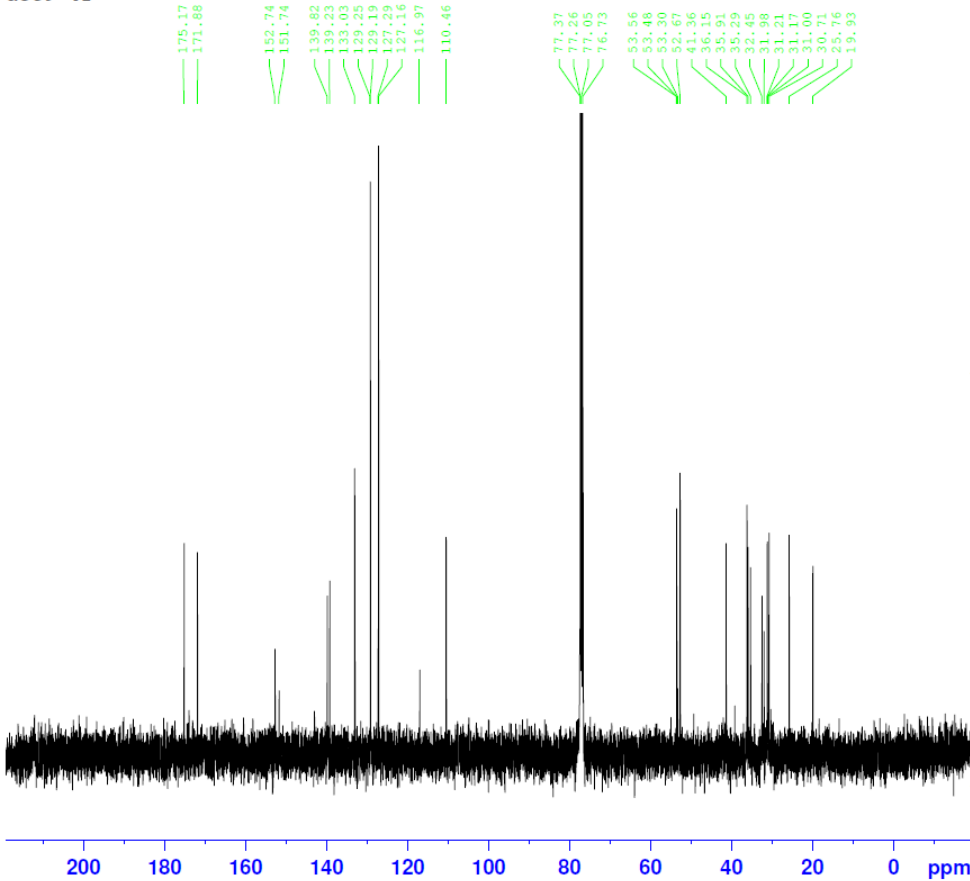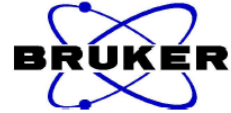

Current Data Parameters  
 NAME aet9-41  
 EXPNO 11  
 PROCNO 1

F2 - Acquisition Parameters  
 Date\_ 20130228  
 Time 19.17  
 INSTRUM DPX400  
 PROBHD 5 mm QNP 1H/13  
 PULPROG zgpg30  
 TD 65536  
 SOLVENT CDC13  
 NS 1024  
 DS 4  
 SWH 23980.814 Hz  
 FIDRES 0.365918 Hz  
 AQ 1.3664756 sec  
 RG 1290.2  
 DW 20.850 usec  
 DE 6.00 usec  
 TE 293.2 K  
 D1 2.00000000 sec  
 d11 0.03000000 sec  
 DELTA 1.899999999 sec  
 TDO 1

===== CHANNEL f1 =====  
 NUC1 13C  
 P1 8.50 usec  
 PL1 -2.60 dB  
 SFO1 100.6228298 MHz

===== CHANNEL f2 =====  
 CPDPRG2 waltz16  
 NUC2 1H  
 PCPD2 80.00 usec  
 PL2 -1.50 dB  
 PL12 17.50 dB  
 PL13 17.50 dB  
 SFO2 400.1316005 MHz

F2 - Processing parameters  
 SI 32768  
 SF 100.6127690 MHz  
 WDW EM  
 SSB 0  
 LB 1.00 Hz  
 GB 0  
 PC 1.40

aet9-41

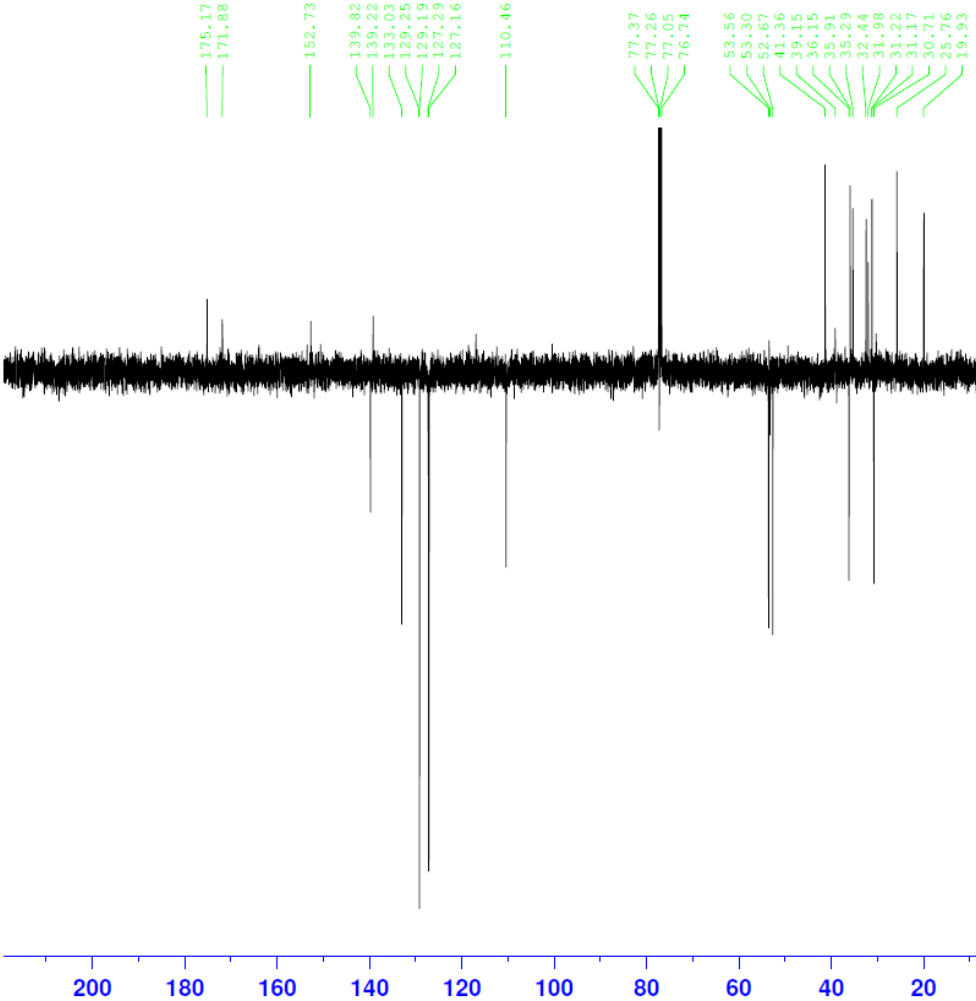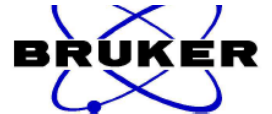

Current Data Parameters  
 NAME aet9-41  
 EXPNO 12  
 PROCNO 1

F2 - Acquisition Parameters  
 Date\_ 20130228  
 Time 19.47  
 INSTRUM DPX400  
 PROBHD 5 mm QNP 1H/13  
 PULPROG deptq\_135  
 TD 65536  
 SOLVENT CDC13  
 NS 512  
 DS 4  
 SWH 23980.814 Hz  
 FIDRES 0.365918 Hz  
 AQ 1.3664756 sec  
 RG 18390.4  
 DW 20.850 usec  
 DE 6.00 usec  
 TE 292.2 K  
 CNST2 145.0000000  
 D1 2.00000000 sec  
 d2 0.00344828 sec  
 D11 0.03000000 sec  
 DELTA 0.00001082 sec

===== CHANNEL f1 =====  
 NUC1 13C  
 P1 8.50 usec  
 P2 17.00 usec  
 PL1 -2.60 dB  
 SFO1 100.6228300 MHz

===== CHANNEL f2 =====  
 CPDPRG2 waltz16  
 NUC2 1H  
 P3 10.00 usec  
 P4 20.00 usec  
 PCPD2 80.00 usec  
 PL2 -1.50 dB  
 PL12 17.50 dB  
 SFO2 400.1316000 MHz

F2 - Processing parameters  
 SI 32768  
 SF 100.6127690 MHz  
 WDW EM  
 SSB 0  
 LB 1.00 Hz  
 GB 0  
 PC 1.40

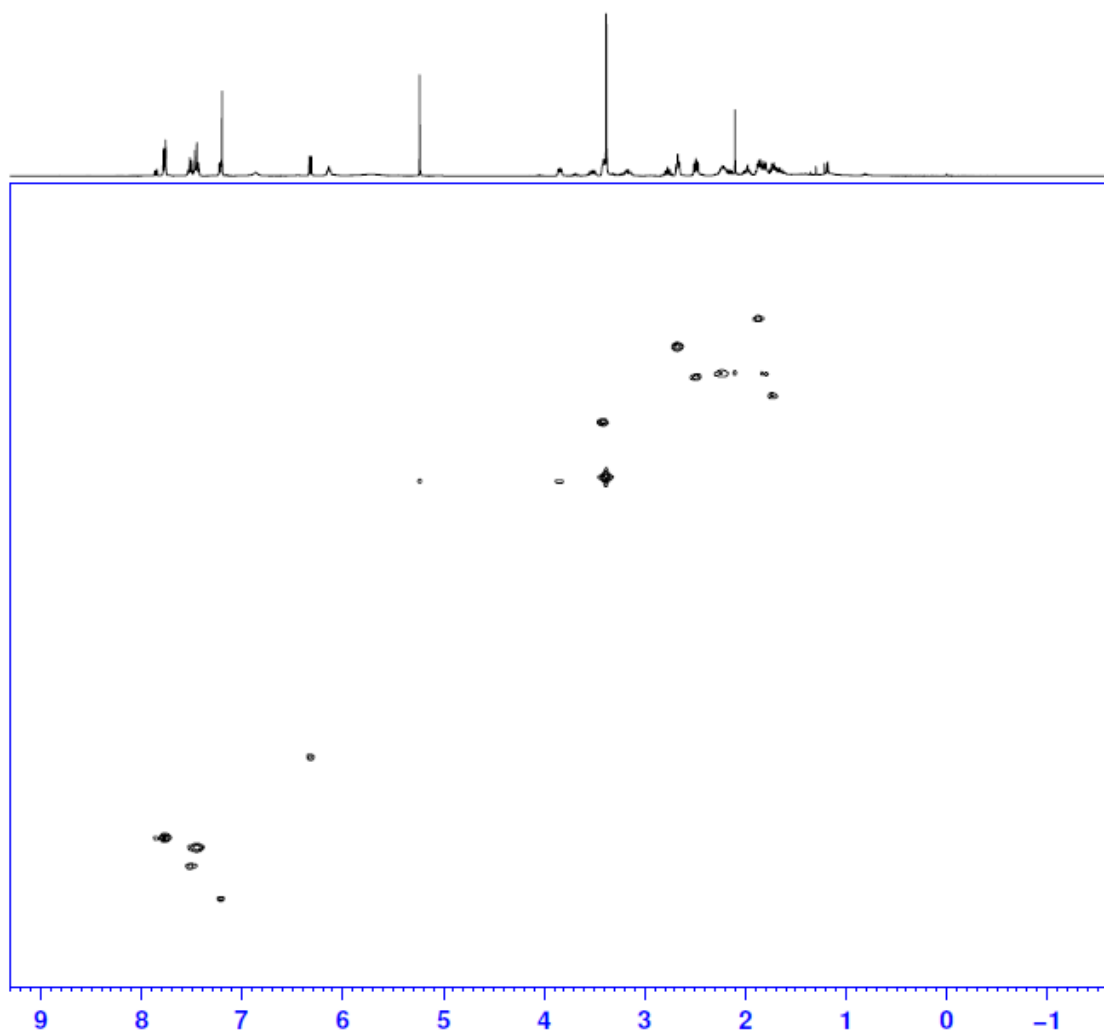

Current Data Parameters  
 NAME: test3-41  
 EXPNO: 14  
 PROCNO: 1

F2 - Acquisition Parameters  
 Date\_: 20130228  
 Time: 20.08  
 INSTRUM: spect400  
 PULPROG: zgpg30  
 F2 - Acquisition Parameters  
 S mm QNP 1H/13  
 PULPROG: hmqcpgpgf  
 TD: 1024  
 SOLVENT: cdcl3  
 NS: 4  
 DS: 16  
 SWH: 4370.639 Hz  
 FIDRES: 4.258193 Hz  
 AQ: 0.1171956 sec  
 RG: 26008  
 SW: 114.400 usec  
 DE: 6.00 usec  
 TE: 292.2 K  
 CHGT2: 145.000000  
 d0: 0.00000300 sec  
 d1: 1.51023996 sec  
 d2: 0.00344828 sec  
 d12: 0.00002000 sec  
 d13: 0.00000400 sec  
 D16: 0.00020000 sec  
 DELTA1: 0.0022428 sec  
 IN0: 0.00003000 sec

----- CHANNEL f1 -----  
 NUC1: 1H  
 P1: 10.00 usec  
 P2: 20.00 usec  
 PL1: -1.50 dB  
 SFO1: 400.1315728 MHz

----- CHANNEL f2 -----  
 CPDPRG2: gqzgpg  
 NUC2: 13C  
 P3: 8.00 usec  
 PCDP2: 74.00 usec  
 PL2: -3.00 dB  
 PL12: 18.00 dB  
 SFO2: 100.6203140 MHz

----- GRADIENT CHANNEL -----  
 GPMAM1: SINE.100  
 GPMAM2: SINE.100  
 GPMAM3: SINE.100  
 GPR1: 50.00 %  
 GPR2: 30.00 %  
 GPR3: 40.10 %  
 P1G: 1000.00 usec

F1 - Acquisition parameters  
 NO0: 2  
 TD: 128  
 SFO1: 100.6203 MHz  
 FIDRES: 130.208328 Hz  
 SW: 165.639 ppm  
 F2 - Processing parameters  
 SI: 1024  
 SF: 400.1300339 MHz  
 MDM: QSINE  
 SSB: 2 Hz  
 LB: 0 Hz  
 GB: 0  
 FC: 1.40

F1 - Processing parameters  
 SI: 1024  
 MC2: QF  
 SF: 100.6127690 MHz  
 MDM: QSINE  
 SSB: 2 Hz  
 LB: 0.00 Hz  
 GB: 0

**Methyl (S)-4-((1*r*\*,3*R*\*)-3-(2-(5,6,7,8-tetrahydro-1,8-naphthyridin-2-yl)ethyl)cyclobutane-1-carboxamido)-2-(2,4,6-trimethylphenylsulfonamido)butanoate [Compound 24]**

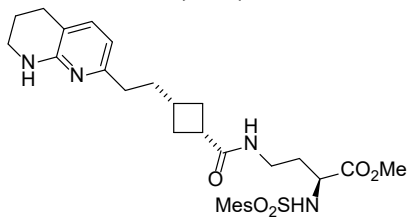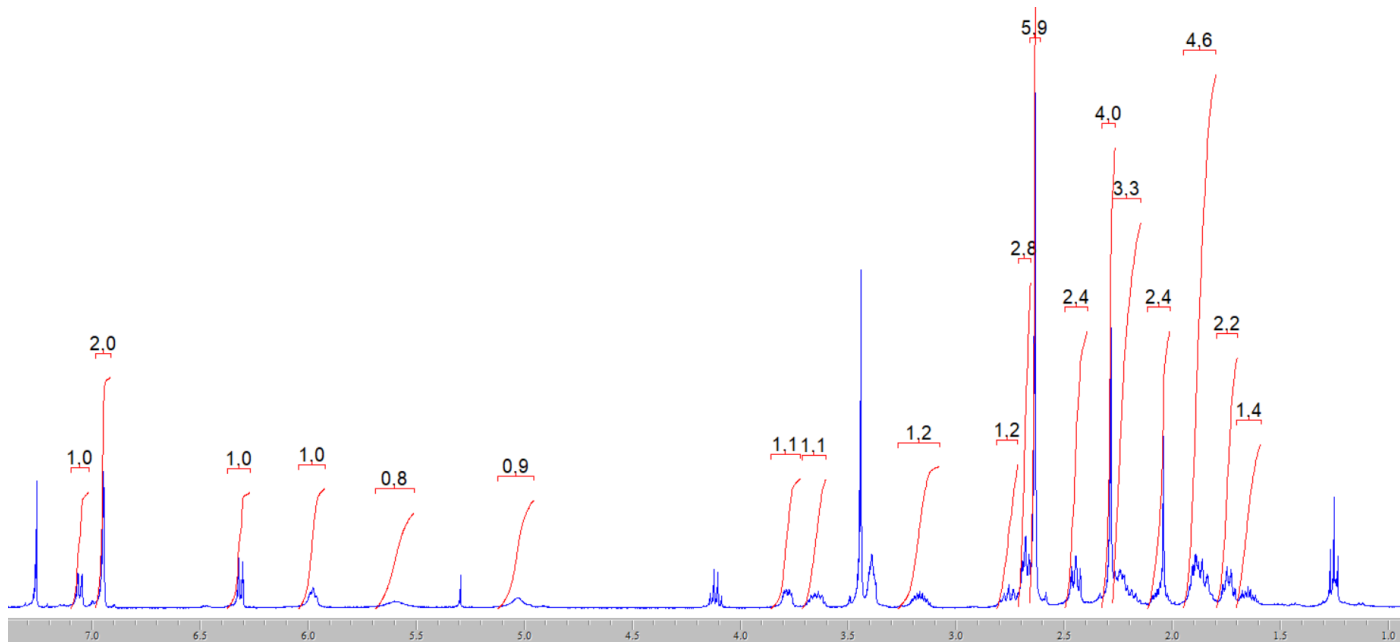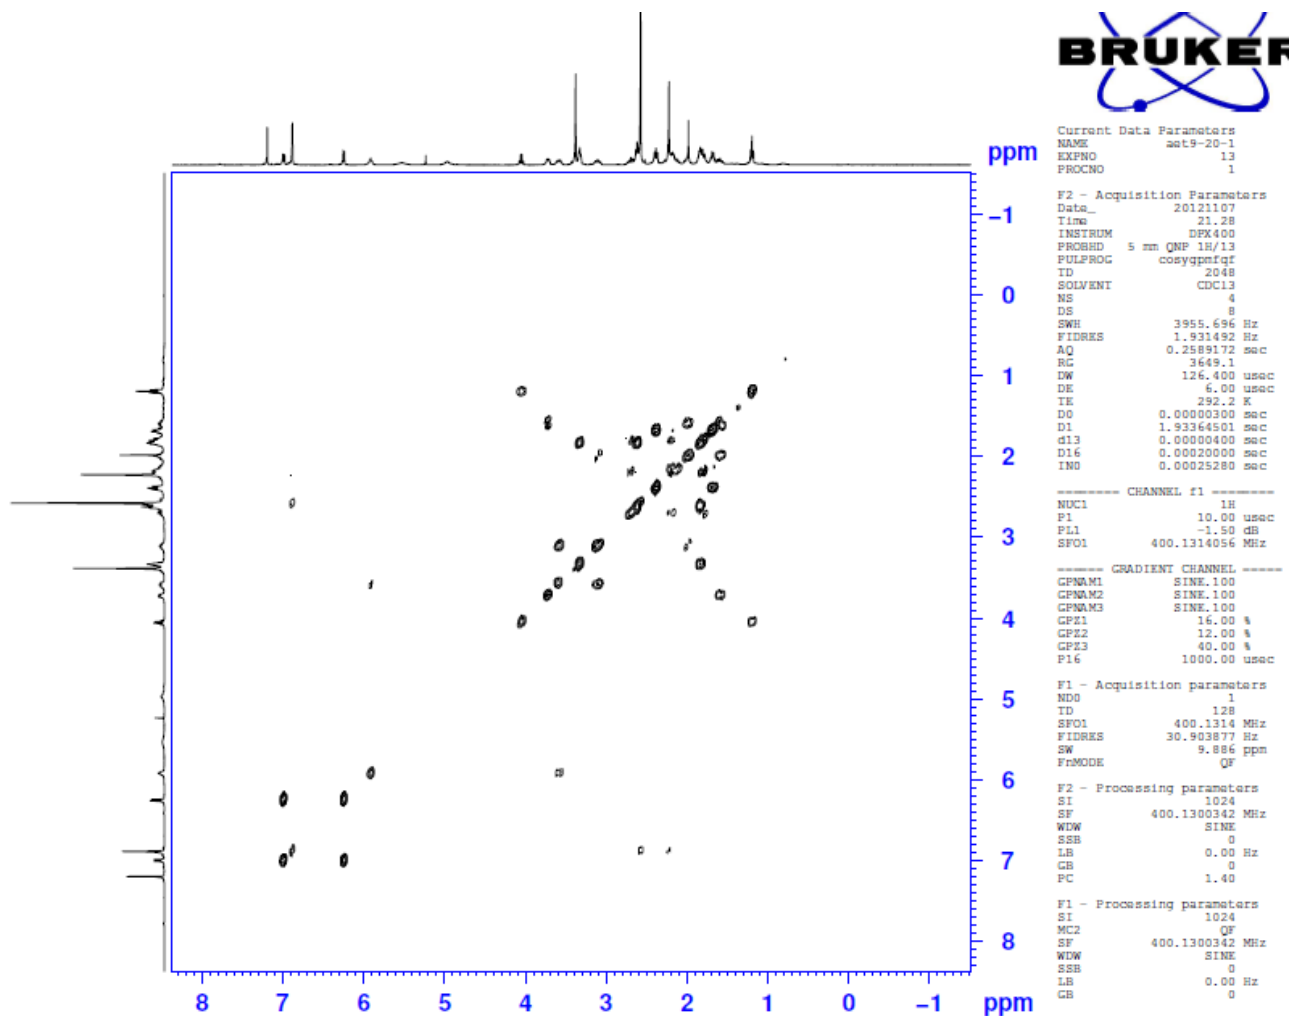

**BRUKER**

Current Data Parameters  
NAME set9-20-1  
EXPNO 13  
PROCNO 1

F2 - Acquisition Parameters  
Date\_ 20121107  
Time 21.28  
INSTRUM DPX400  
PROBHD 5 mm QNP 1H/13  
PULPROG cosygpcfgf  
ID 2048  
SOLVENT CDCl3  
NS 4  
DS 8  
SWH 3955.696 Hz  
FIDRES 1.931492 Hz  
AQ 0.2589172 sec  
RG 3649.1  
DW 126.400 usec  
DE 6.00 usec  
TE 292.2 K  
D0 0.0000300 sec  
d13 1.9364501 sec  
d16 0.0000400 sec  
IN0 0.00025280 sec

----- CHANNEL f1 -----  
NUC1 13  
P1 10.00 usec  
PL1 -1.50 dB  
SFO1 400.1314056 MHz

----- GRADIENT CHANNEL -----  
GPNAM1 SINE.100  
GPNAM2 SINE.100  
GPNAM3 SINE.100  
GPZ1 16.00 %  
GPZ2 12.00 %  
GPZ3 40.00 %  
P16 1000.00 usec

F1 - Acquisition parameters  
ND0 1  
ID 128  
SFO1 400.1314 MHz  
FIDRES 30.903877 Hz  
SW 9.886 ppm  
FMODE QF

F2 - Processing parameters  
SI 1024  
SF 400.1300342 MHz  
WDW SINE  
SSB 0  
LB 0.00 Hz  
GB 0  
PC 1.40

F1 - Processing parameters  
SI 1024  
MC2 QF  
SF 400.1300342 MHz  
WDW SINE  
SSB 0  
LB 0.00 Hz  
GB 0

aet9-20-1

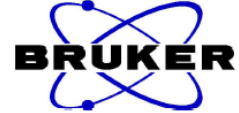

```

Current Data Parameters
NAME          aet9-20-1
EXPNO         11
PROCNO        1

F2 - Acquisition Parameters
Date_         20121107
Time_         20.57
INSTRUM       DPX400
PROBHD        5 mm QNP 1H/13
PULPROG       zgpg30
TD            65536
SOLVENT       CDCl3
NS            1024
DS            4
SWH           23980.814 Hz
FIDRES        0.365918 Hz
AQ            1.3664756 sec
RG            512
DW            20.850 usec
DE            6.00 usec
TE            292.2 K
D1            2.0000000 sec
d11           0.0300000 sec
DELTA         1.89999998 sec
TDO           1

```

```

===== CHANNEL f1 =====
NUC1          13C
P1            8.50 usec
PL1           -2.60 dB
SFO1         100.6228298 MHz

```

```

===== CHANNEL f2 =====
CPDPRG2      waltz16
NUC2          1H
PCPD2        80.00 usec
PL2           -1.50 dB
PL12         17.50 dB
PL13         17.50 dB
SFO2         400.1316005 MHz

```

```

F2 - Processing parameters
SI            32768
SF            100.6127690 MHz
WDW           EM
SSB           0
LB            1.00 Hz
GB            0
PC            1.40

```

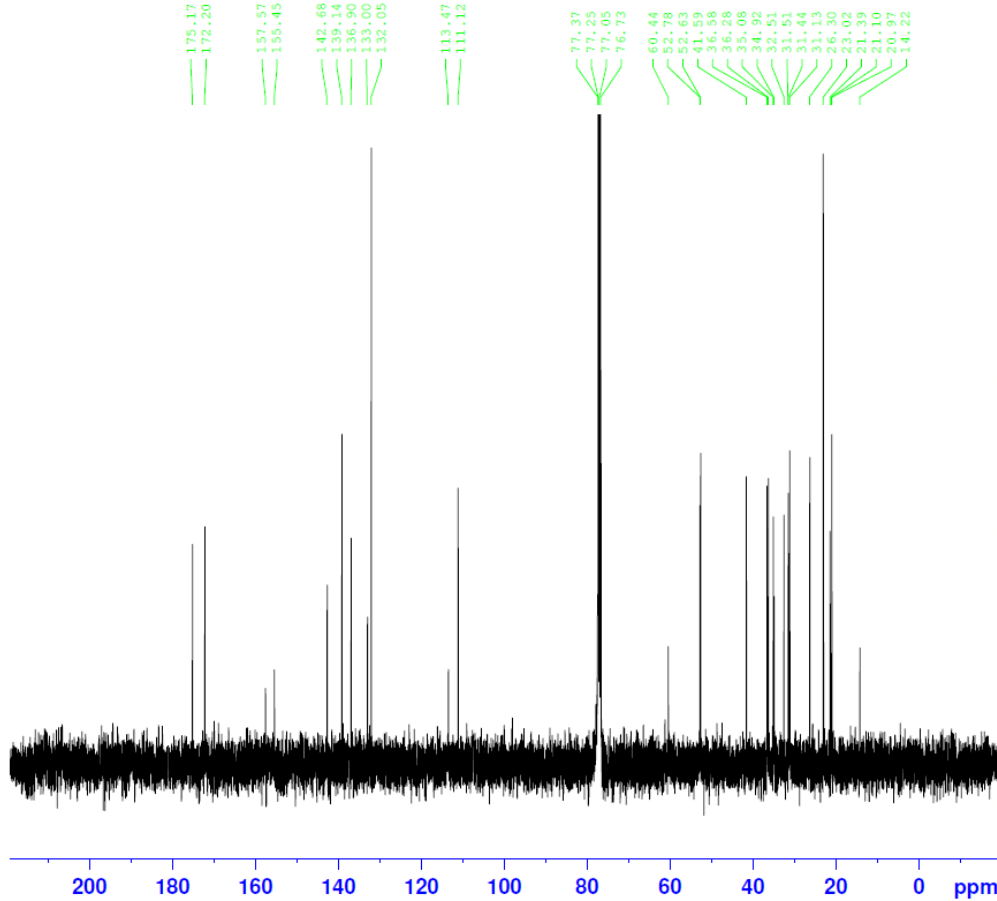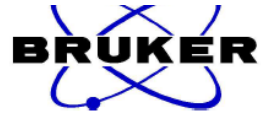

```

Current Data Parameters
NAME          aet9-20-1
EXPNO         12
PROCNO        1

F2 - Acquisition Parameters
Date_         20121107
Time_         21.27
INSTRUM       DPX400
PROBHD        5 mm QNP 1H/13
PULPROG       deptq_135
TD            65536
SOLVENT       CDCl3
NS            512
DS            4
SWH           23980.814 Hz
FIDRES        0.365918 Hz
AQ            1.3664756 sec
RG            20642.5
DW            20.850 usec
DE            6.00 usec
TE            292.2 K
CNST2        145.0000000
D1            2.0000000 sec
d2            0.00344828 sec
D11           0.0300000 sec
DELTA         0.00001082 sec

```

```

===== CHANNEL f1 =====
NUC1          13C
P1            8.50 usec
P2            17.00 usec
PL1           -2.60 dB
SFO1         100.6228300 MHz

```

```

===== CHANNEL f2 =====
CPDPRG2      waltz16
NUC2          1H
P3            10.00 usec
P4            20.00 usec
PCPD2        80.00 usec
PL2           -1.50 dB
PL12         17.50 dB
SFO2         400.1316000 MHz

```

```

F2 - Processing parameters
SI            32768
SF            100.6127690 MHz
WDW           EM
SSB           0
LB            1.00 Hz
GB            0
PC            1.40

```

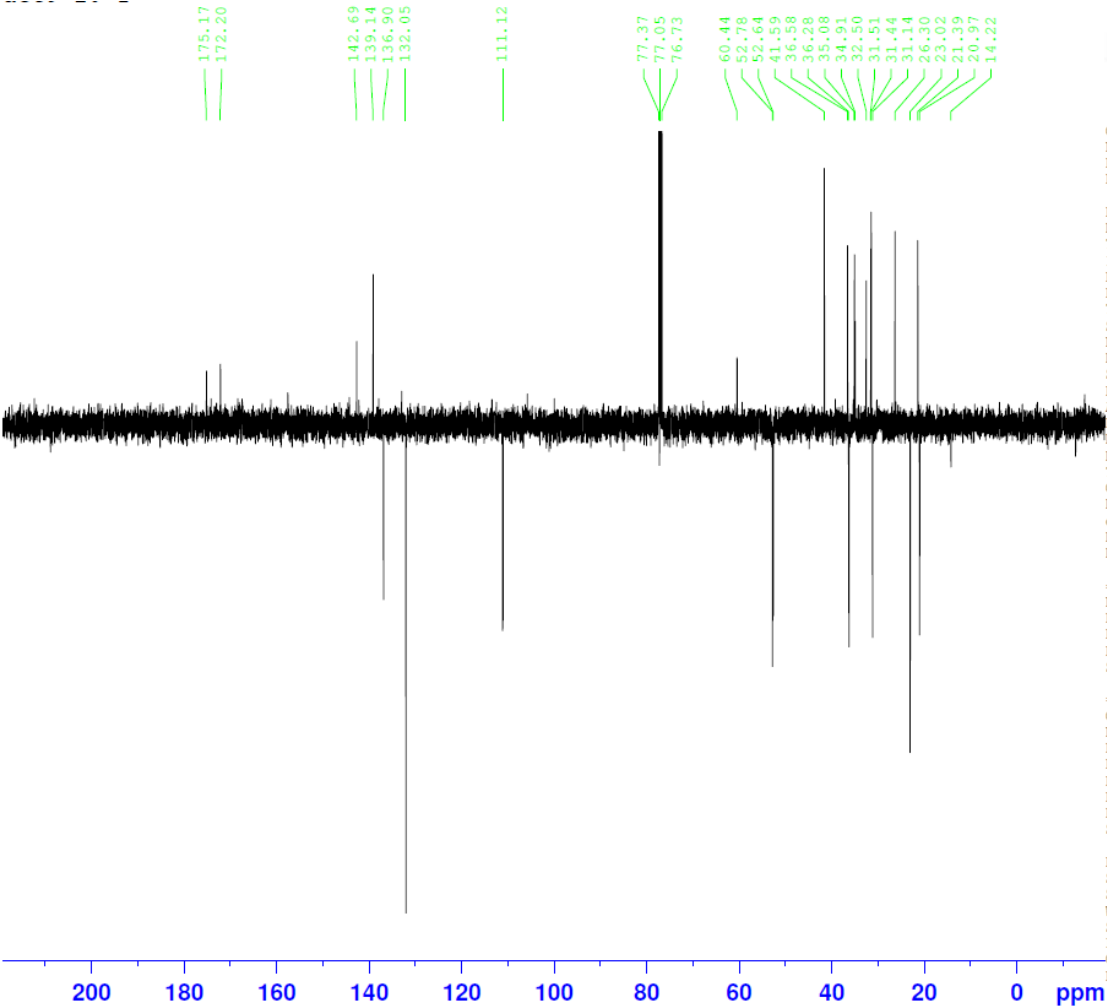

Current Data Parameters  
 NAME: act9-20-1  
 EXPNO: 15  
 PROCNO: 1

F2 - Acquisition Parameters  
 Date\_: 20121107  
 Time: 21:50  
 INSTRUM: spect  
 PROBRD: 5 mm QNP 1H/13  
 PULPROG: zgpg30  
 TD: 1024  
 SOLVENT: CDCl3  
 NS: 4  
 DS: 16  
 SWH: 3955.694 Hz  
 FIDRES: 3.862985 Hz  
 AQ: 0.1294834 sec  
 RG: 650  
 DW: 126.400 usec  
 DE: 6.00 usec  
 TE: 292.2 K  
 CNST2: 145.0000000  
 d0: 0.0000300 sec  
 d1: 1.49795198 sec  
 d2: 0.00344828 sec  
 d12: 0.00002000 sec  
 d13: 0.00004000 sec  
 d16: 0.00200000 sec  
 DELTA1: 0.0022428 sec  
 IN0: 0.00003000 sec

----- CHANNEL F1 -----  
 NUC1: 1H  
 P1: 10.00 usec  
 PL: 20.00 usec  
 PL1: -1.50 dB  
 SFO1: 400.1314054 MHz

----- CHANNEL F2 -----  
 CPDPRG2: gcp  
 NUC2: 13C  
 P3: 8.00 usec  
 PCPD2: 74.00 usec  
 PL2: -3.00 dB  
 PL12: 18.00 dB  
 SFO2: 100.6203140 MHz

----- GRADIENT CHANNEL -----  
 GPMAX1: SINE.100  
 GPMAX2: SINE.100  
 GPMAX3: SINE.100  
 GPR1: 50.00 %  
 GPR2: 30.00 %  
 GPR3: 40.10 %  
 PLG: 1000.00 usec

F1 - Acquisition parameters  
 MD0: 2  
 TD: 128  
 SFO1: 100.6203 MHz  
 FIDRES: 130.208328 Hz  
 SW: 165.639 ppm  
 FWHM: 0

F2 - Processing parameters  
 SI: 1024  
 SF: 400.1300342 MHz  
 WDM: QCSINE  
 SSB: 2  
 LB: 0.00 Hz  
 GB: 0  
 PC: 1.40

F1 - Processing parameters  
 SI: 1024  
 MC2: 0  
 SF: 100.6127690 MHz  
 WDM: QCSINE  
 SSB: 2  
 LB: 0.00 Hz  
 GB: 0

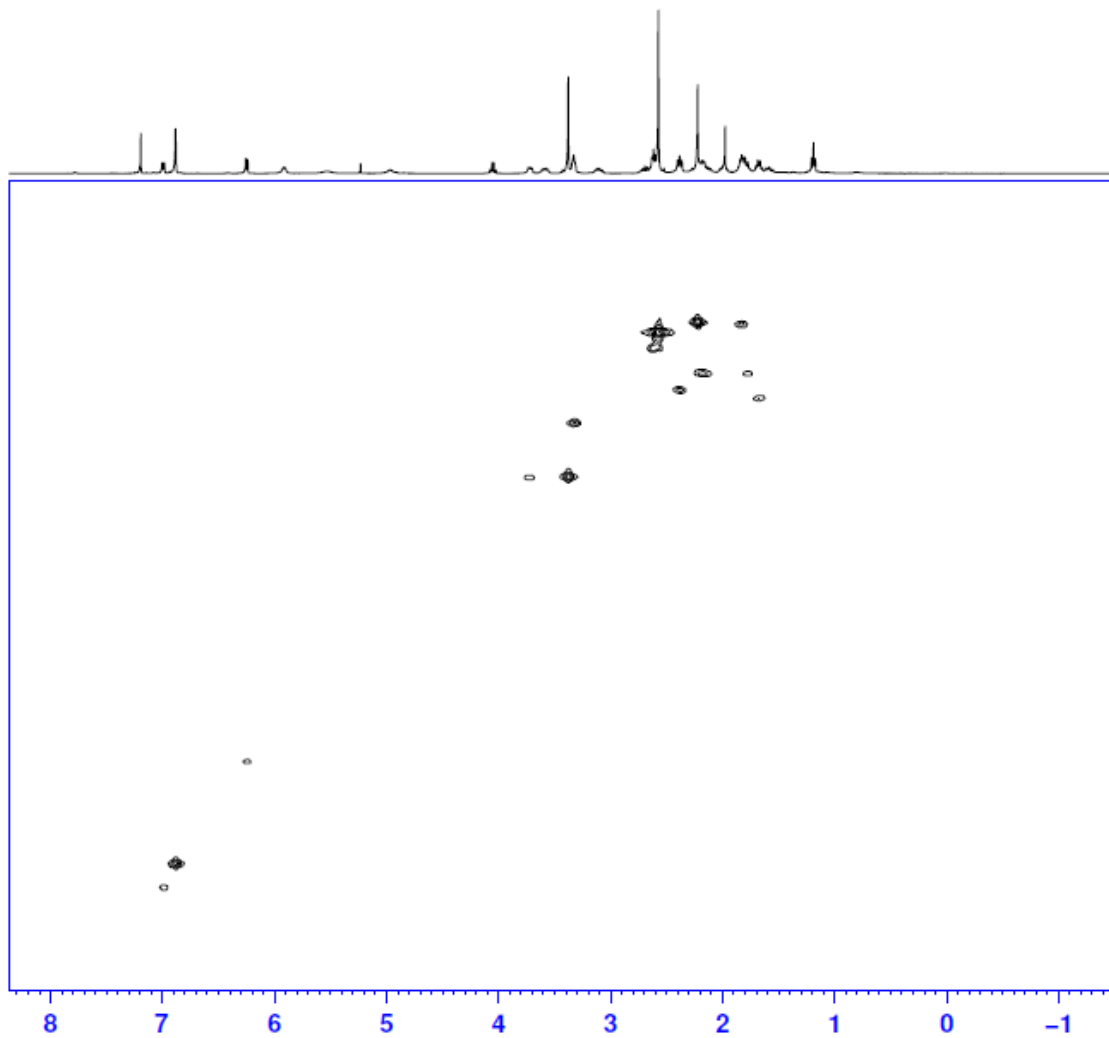

**(1*r*\*, 3*s*\*)-3-(2-(1,8-Naphthyridin-2-yl)ethyl)cyclobutan-1-amine [Compound 25]:**

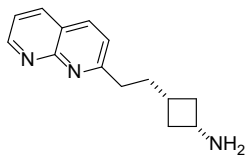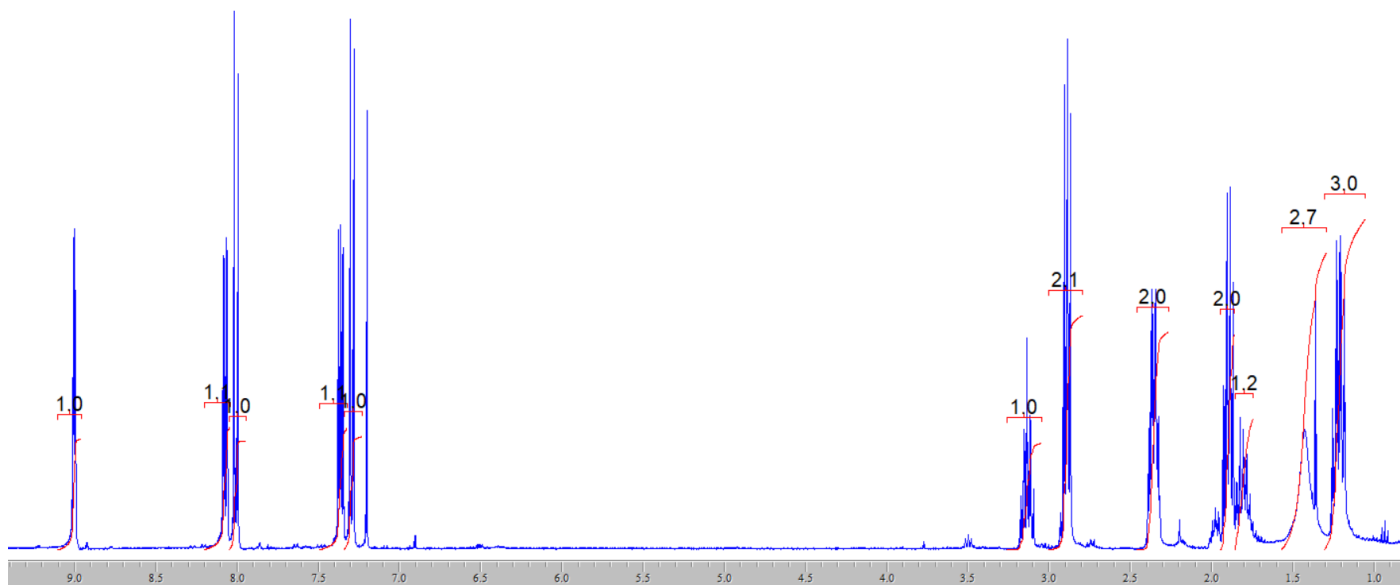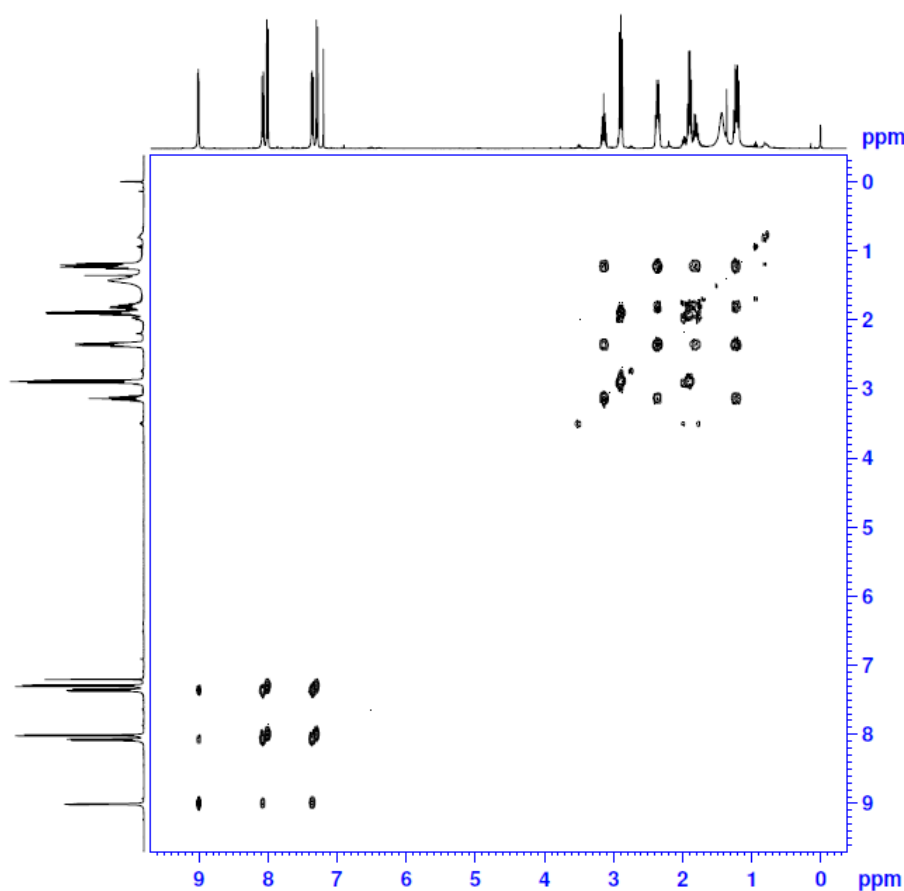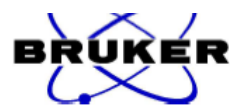

Current Data Parameters  
NAME set7-16  
EXFNO 13  
PROCNO 1

F2 - Acquisition Parameters  
Date\_ 20111027  
Time 0.09  
INSTRUM DFX400  
PROBHD 5 mm QNP 1H/13  
PULPROG cosygpgmf  
TD 2048  
SOLVENT CDCl3  
NS 4  
DS 8  
SWH 4032.258 Hz  
FIDRES 1.968876 Hz  
AQ 0.2340020 sec  
RG 3251  
DW 124.000 usec  
DE 6.00 usec  
TE 298.2 K  
DD 0.00000300 sec  
D1 1.93774104 sec  
d13 0.00000400 sec  
D16 0.00020000 sec  
IND 0.00024800 sec

----- CHANNEL f1 -----  
NUC1 1H  
P1 10.00 usec  
PL1 -1.50 dB  
SFO1 400.1318955 MHz

----- GRADIENT CHANNEL -----  
GPNAM1 SINE.100  
GPNAM2 SINE.100  
GPNAM3 SINE.100  
CPZ1 16.00 %  
CPZ2 12.00 %  
CPE3 40.00 %  
P16 1000.00 usec

F1 - Acquisition parameters  
ND0 1  
TD 128  
SFO1 400.1319 MHz  
FIDRES 31.500016 Hz  
SW 10.077 ppm  
FrMODE QF

F2 - Processing parameters  
SI 1024  
SF 400.1300320 MHz  
WDW SINE  
SSB 0  
LB 0.00 Hz  
GB 0  
PC 1.40

F1 - Processing parameters  
SI 1024  
MC2 QF  
SF 400.1300320 MHz  
WDW SINE  
SSB 0  
LB 0.00 Hz  
GB 0



aet7-16

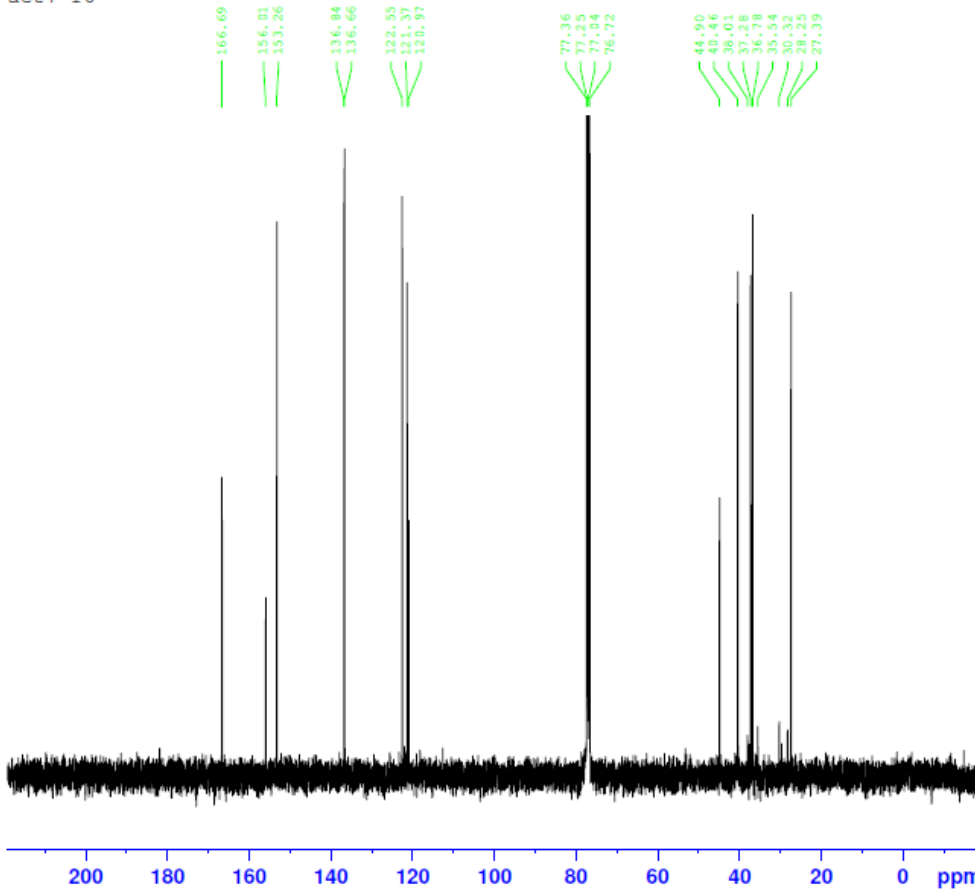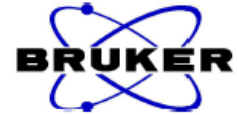

Current Data Parameters  
NAME aet7-16  
EXPNO 11  
PROCNO 1

F2 - Acquisition Parameters  
Date\_ 20111026  
Time 23.38  
INSTRUM DPX400  
PROBHD 5 mm QNP 1H/13  
PULPROG zgpg30  
TD 65536  
SOLVENT CDC13  
NS 1024  
DS 4  
SWH 23980.814 Hz  
FIDRES 0.365918 Hz  
AQ 1.3664756 sec  
RG 1824.6  
DW 20.850 usec  
DE 6.00 usec  
TE 298.2 K  
D1 2.00000000 sec  
d11 0.03000000 sec  
DELTA 1.89999998 sec  
TD0 1

----- CHANNEL f1 -----  
NUC1 13C  
P1 8.00 usec  
PL1 -2.60 dB  
SFO1 100.6228298 MHz

----- CHANNEL f2 -----  
CPDPRG2 waltz16  
NUC2 1H  
PCPD2 80.00 usec  
PL2 -1.50 dB  
PL12 17.50 dB  
PL13 17.50 dB  
SFO2 400.1316005 MHz

F2 - Processing parameters  
SI 32768  
SF 100.6127690 MHz  
WDW EM  
SSB 0  
LB 1.00 Hz  
GB 0  
PC 1.40

aet7-16

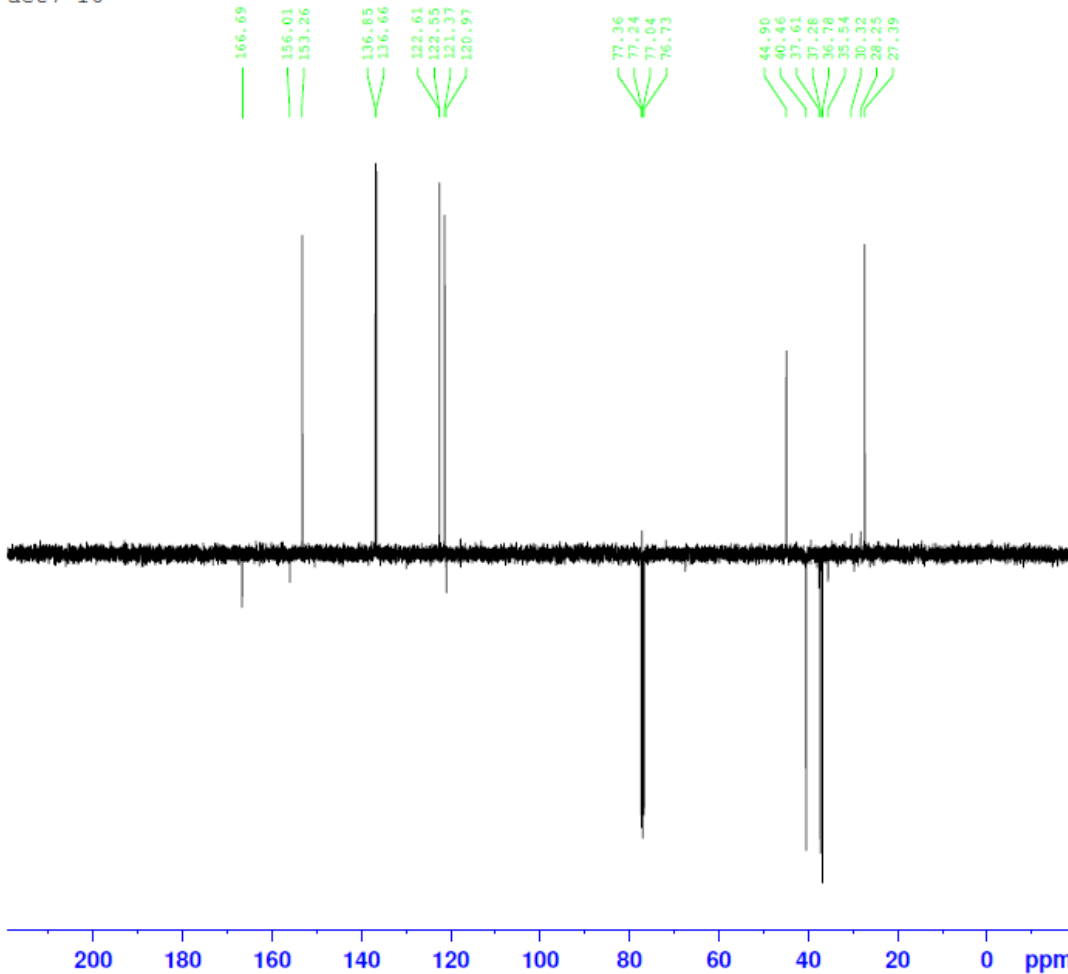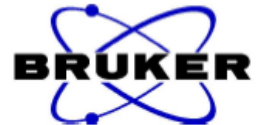

Current Data Parameters  
NAME aet7-16  
EXPNO 12  
PROCNO 1

F2 - Acquisition Parameters  
Date\_ 20111027  
Time 0.08  
INSTRUM DPX400  
PROBHD 5 mm QNP 1H/13  
PULPROG deptq\_135  
TD 65536  
SOLVENT CDC13  
NS 512  
DS 4  
SWH 23980.814 Hz  
FIDRES 0.365918 Hz  
AQ 1.3664756 sec  
RG 16384  
DW 20.850 usec  
DE 6.00 usec  
TE 298.2 K  
CNST2 145.00000000  
D1 2.00000000 sec  
d2 0.00344828 sec  
D11 0.03000000 sec  
DELTA 0.00001019 sec

----- CHANNEL f1 -----  
NUC1 13C  
P1 8.00 usec  
P2 16.00 usec  
PL1 -2.60 dB  
SFO1 100.6228300 MHz

----- CHANNEL f2 -----  
CPDPRG2 waltz16  
NUC2 1H  
P3 10.00 usec  
P4 20.00 usec  
PCPD2 80.00 usec  
PL2 -1.50 dB  
PL12 17.50 dB  
SFO2 400.1316000 MHz

F2 - Processing parameters  
SI 32768  
SF 100.6127690 MHz  
WDW EM  
SSB 0  
LB 1.00 Hz  
GB 0  
PC 1.40

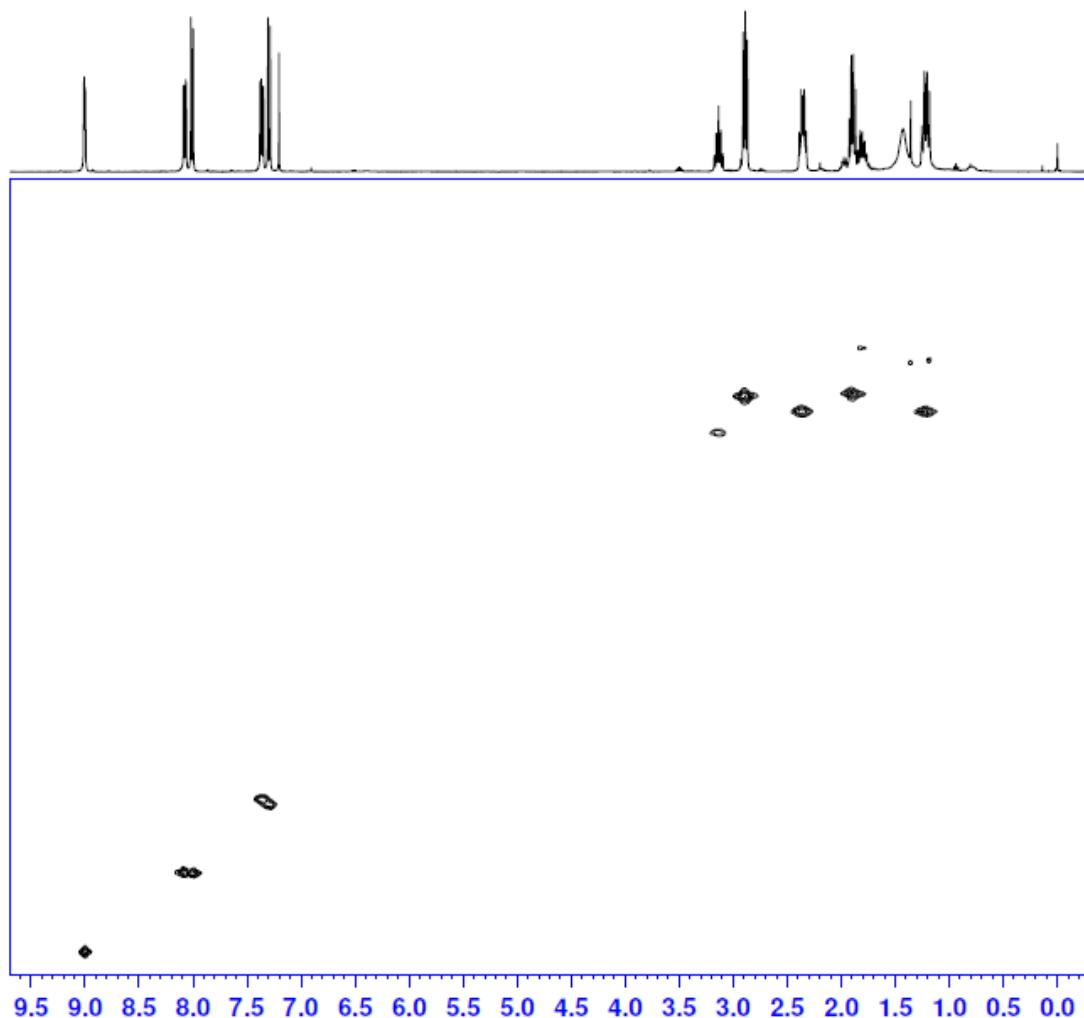

Current Data Parameters  
 NAME act7-16  
 EXPNO 14  
 PROCNO 1

F2 - Acquisition Parameters  
 Date\_ 20111027  
 Time 0.29  
 INSTRUM spect  
 PROBHD 5 mm QNP 1H/13  
 PULPROG hmcqcpzg  
 TD 1024  
 SOLVENT cdcl3  
 NS 4  
 DS 16  
 SWH 4032.258 Hz  
 FIDRES 3.937752 Hz  
 AQ 0.1270260 sec  
 RG 26008  
 DW 124.000 usec  
 DE 6.00 usec  
 TE 298.2 K  
 CNST2 145.0000000  
 d0 0.00000300 sec  
 d1 1.50000000 sec  
 d2 0.00344828 sec  
 d12 0.00002000 sec  
 d13 0.00000400 sec  
 d16 0.00020000 sec  
 DELTA1 0.00222428 sec  
 IN0 0.00003000 sec

CHANNEL F1  
 NUC1 1H  
 P1 10.00 usec  
 P2 20.00 usec  
 PL1 -1.50 dB  
 SFO1 400.1318955 MHz

CHANNEL E2  
 CPDPRG2 gaitp  
 NUC2 13C  
 P3 8.00 usec  
 PCPD2 74.00 usec  
 PL2 -3.00 dB  
 PL12 18.00 dB  
 SFO2 100.6203140 MHz

GRADIENT CHANNEL  
 GPNAM1 SINE.100  
 GPNAM2 SINE.100  
 GPNAM3 SINE.100  
 GPE1 50.00 %  
 GPE2 30.00 %  
 GPE3 40.10 %  
 F1C 1000.00 usec

F1 - Acquisition parameters  
 MD0 2  
 TD 128  
 SFO1 100.6203 MHz  
 FIDRES 130.208328 Hz  
 SW 155.639 ppm  
 F2MODE QF

F2 - Processing parameters  
 SI 1024  
 SF 400.1300320 MHz  
 WSW qSINE  
 SSR 2  
 LB 0.00 Hz  
 GB 0  
 FC 1.40

F1 - Processing parameters  
 SI 1024  
 MC2 QF  
 SF 100.6127690 MHz  
 WSW qSINE  
 SSR 2  
 LB 0.00 Hz  
 GB 0

**(S)-4-Methoxy-4-oxo-3-(phenylsulfonamido)butanoic acid [Compound 26]**

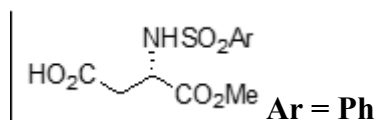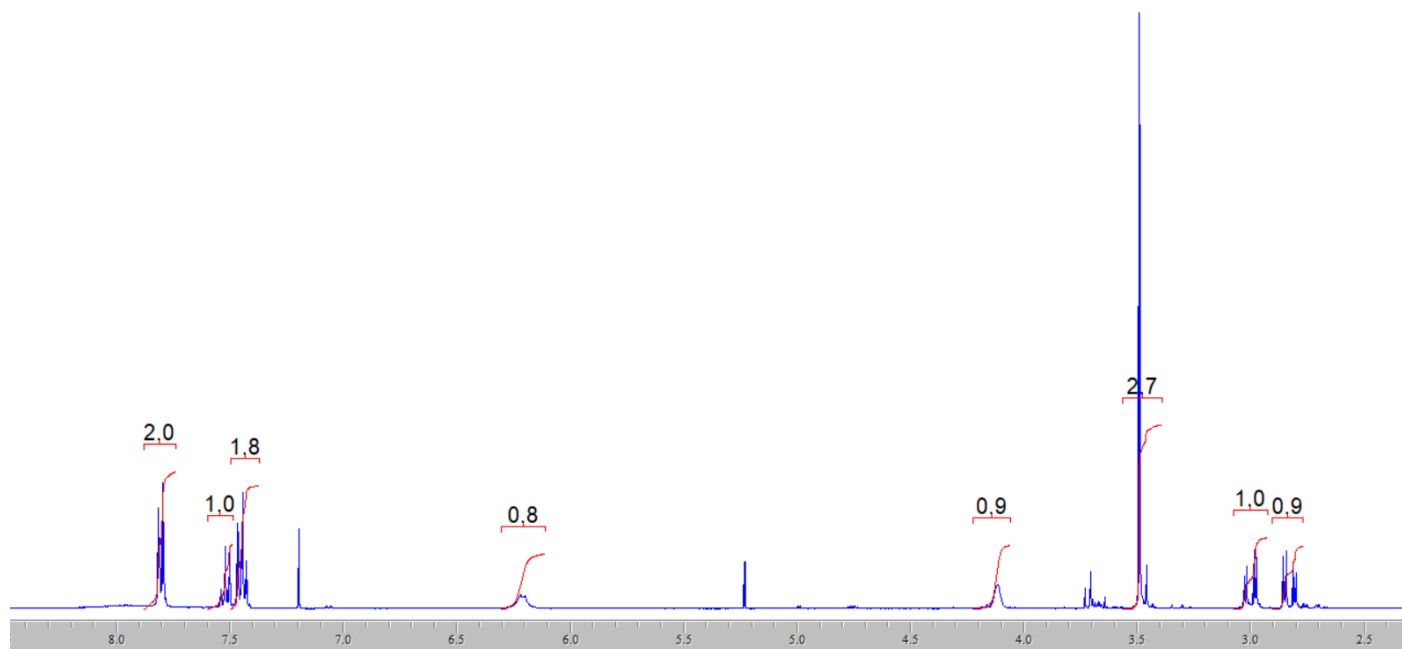

aet7-76-crude

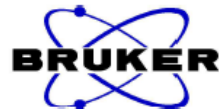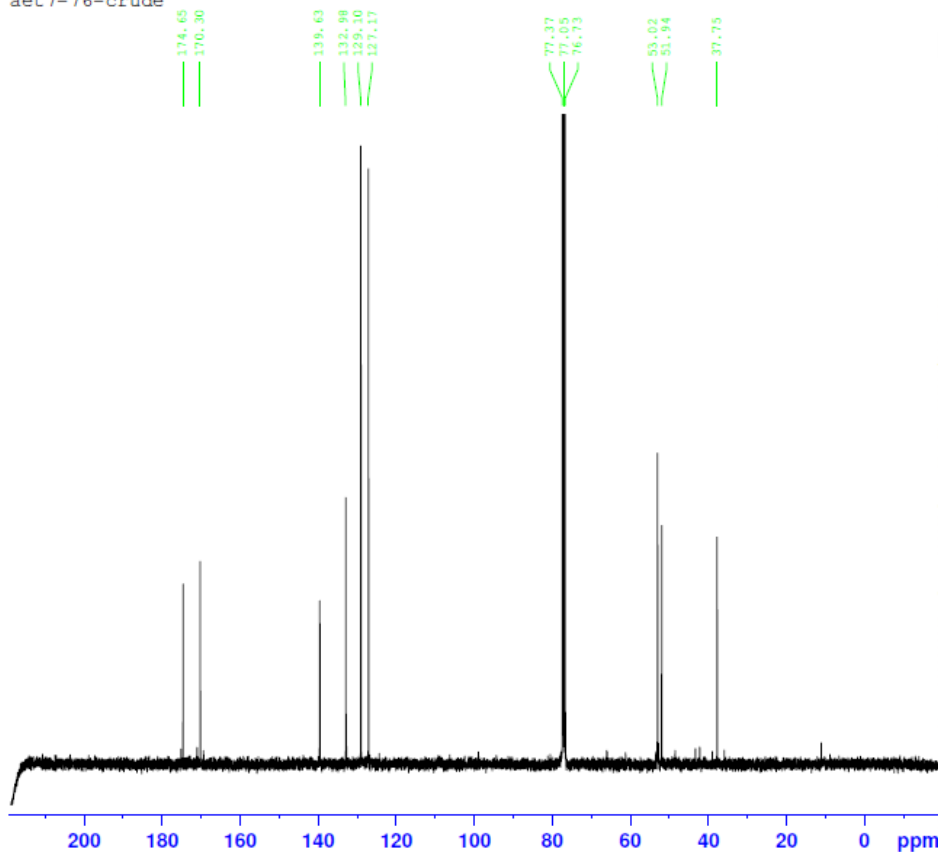

Current Data Parameters  
 NAME aet7-76-crude  
 EXPNO 11  
 PROCNO 1

F2 - Acquisition Parameters  
 Date\_ 20120317  
 Time 9.17  
 INSTRUM DPX400  
 PROBHD 5 mm QNP 1H/13  
 PULPROG zgpg30  
 TD 65536  
 SOLVENT CDC13  
 NS 1024  
 DS 4  
 SWH 23980.814 Hz  
 FIDRES 0.365918 Hz  
 AQ 1.3664756 sec  
 RG 724.1  
 DW 20.850 usec  
 DE 6.00 usec  
 TE 295.2 K  
 D1 2.00000000 sec  
 d11 0.03000000 sec  
 DELTA 1.89999998 sec  
 TD0 1

----- CHANNEL f1 -----  
 NUC1 13C  
 P1 8.50 usec  
 PL1 -2.60 dB  
 SFO1 100.6228298 MHz

----- CHANNEL f2 -----  
 CPDPRG2 waltz16  
 NUC2 1H  
 PCPD2 80.00 usec  
 PL2 -1.50 dB  
 PL12 17.50 dB  
 PL13 17.50 dB  
 SFO2 400.1316005 MHz

F2 - Processing parameters  
 SI 32768  
 SF 100.6127690 MHz  
 NWDW EM  
 SSB 0  
 LB 1.00 Hz  
 GB 0  
 PC 1.40

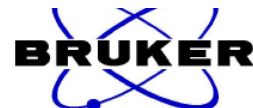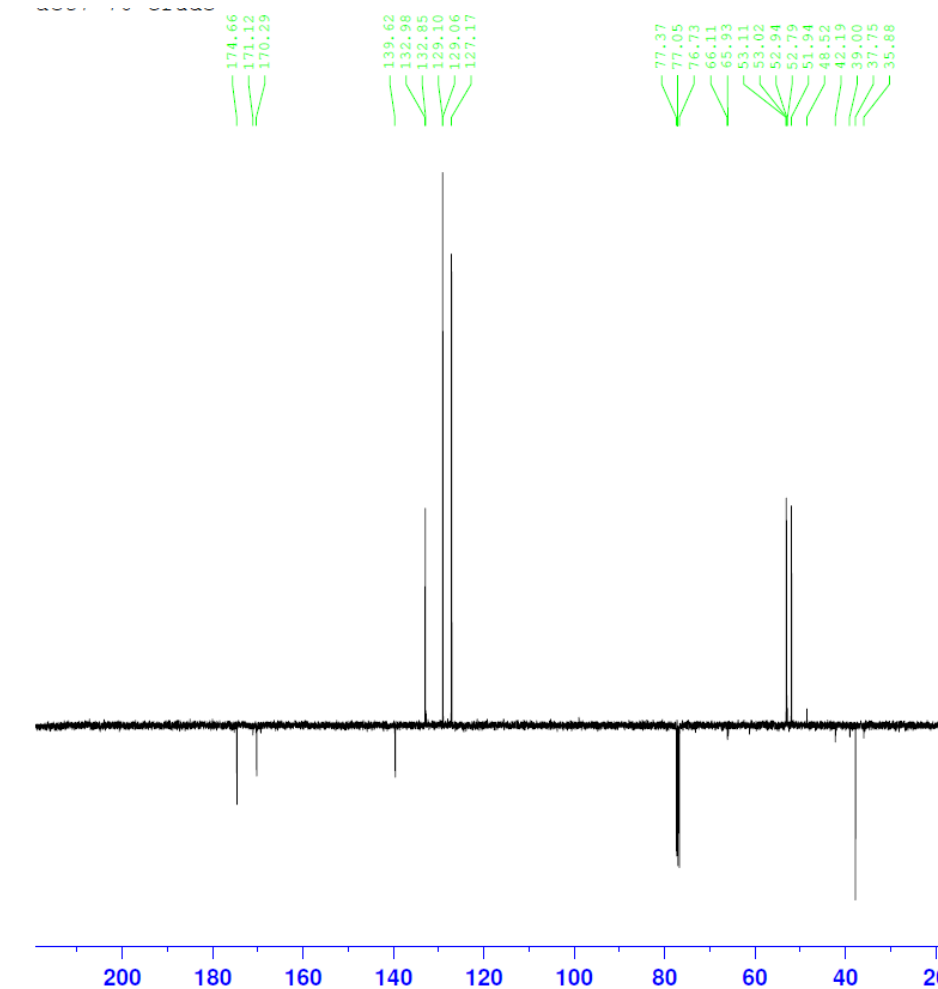

Current Data Parameters  
 NAME aet7-76-crude  
 EXPNO 12  
 PROCNO 1

F2 - Acquisition Parameters  
 Date\_ 20120316  
 Time 11.43  
 INSTRUM DPX400  
 PROBHD 5 mm QNP 1H/13  
 PULPROG deptg\_135  
 TD 65536  
 SOLVENT CDC13  
 NS 512  
 DS 4  
 SWH 23980.814 Hz  
 FIDRES 0.365918 Hz  
 AQ 1.3664756 sec  
 RG 11585.2  
 DW 20.850 usec  
 DE 6.00 usec  
 TE 294.2 K  
 CNST2 145.0000000  
 D1 2.00000000 sec  
 d2 0.00344828 sec  
 D11 0.03000000 sec  
 DELTA 0.00001082 sec

===== CHANNEL f1 =====  
 NUC1 13C  
 P1 8.50 usec  
 P2 17.00 usec  
 PL1 -2.60 dB  
 SFO1 100.6228300 MHz

===== CHANNEL f2 =====  
 CPDPRG2 waltz16  
 NUC2 1H  
 P3 10.00 usec  
 P4 20.00 usec  
 PCPD2 80.00 usec  
 PL2 -1.50 dB  
 PL12 17.50 dB  
 SFO2 400.1316000 MHz

F2 - Processing parameters  
 SI 32768  
 SF 100.6127690 MHz  
 WDW EM  
 SSB 0  
 LB 1.00 Hz  
 GB 0  
 PC 1.40

**(S)-4-Methoxy-4-oxo-3-(2,4,6-trimethylphenylsulfonamido)butanoic acid [Compound 27]**

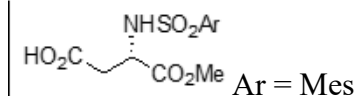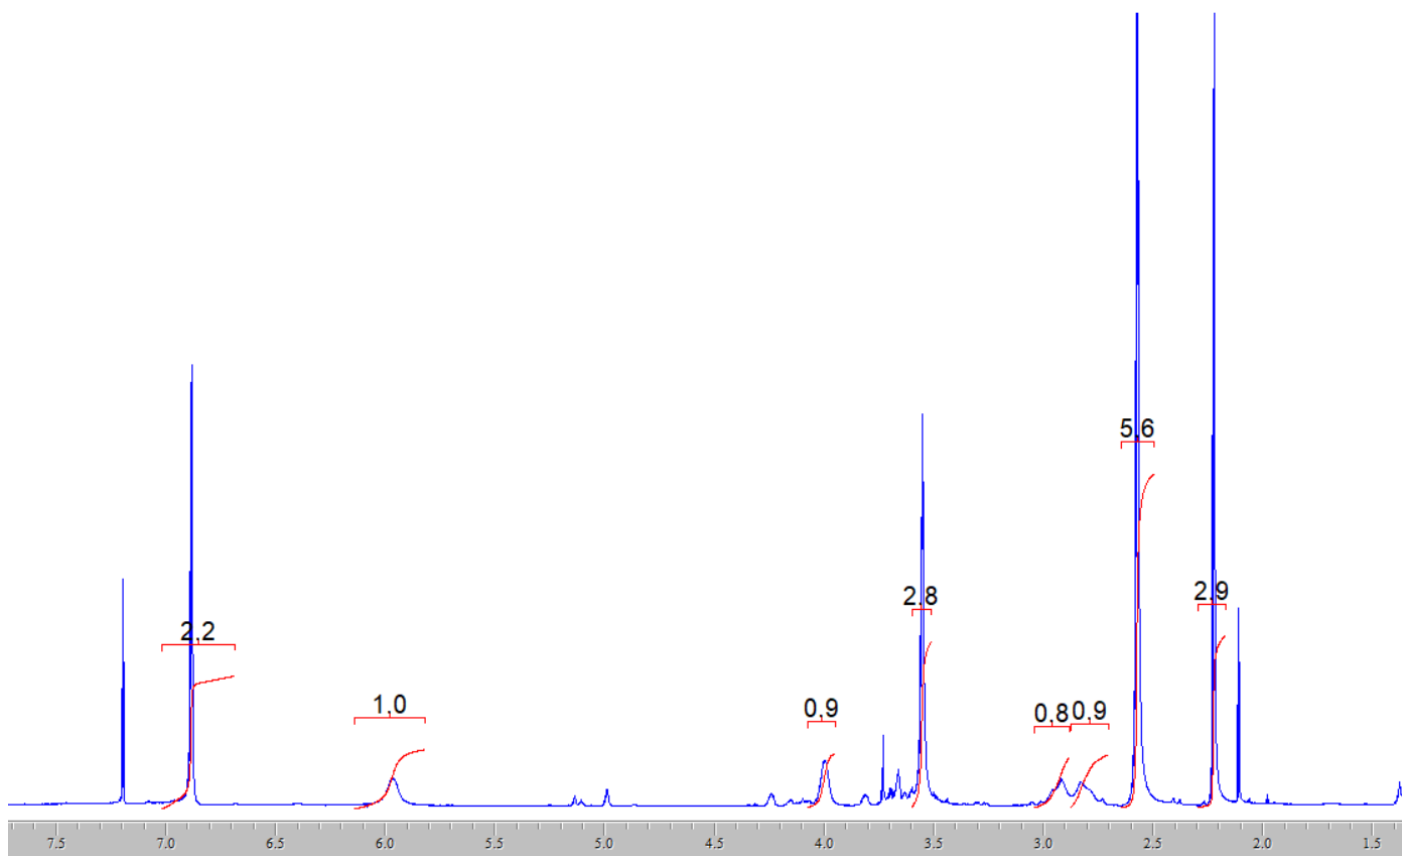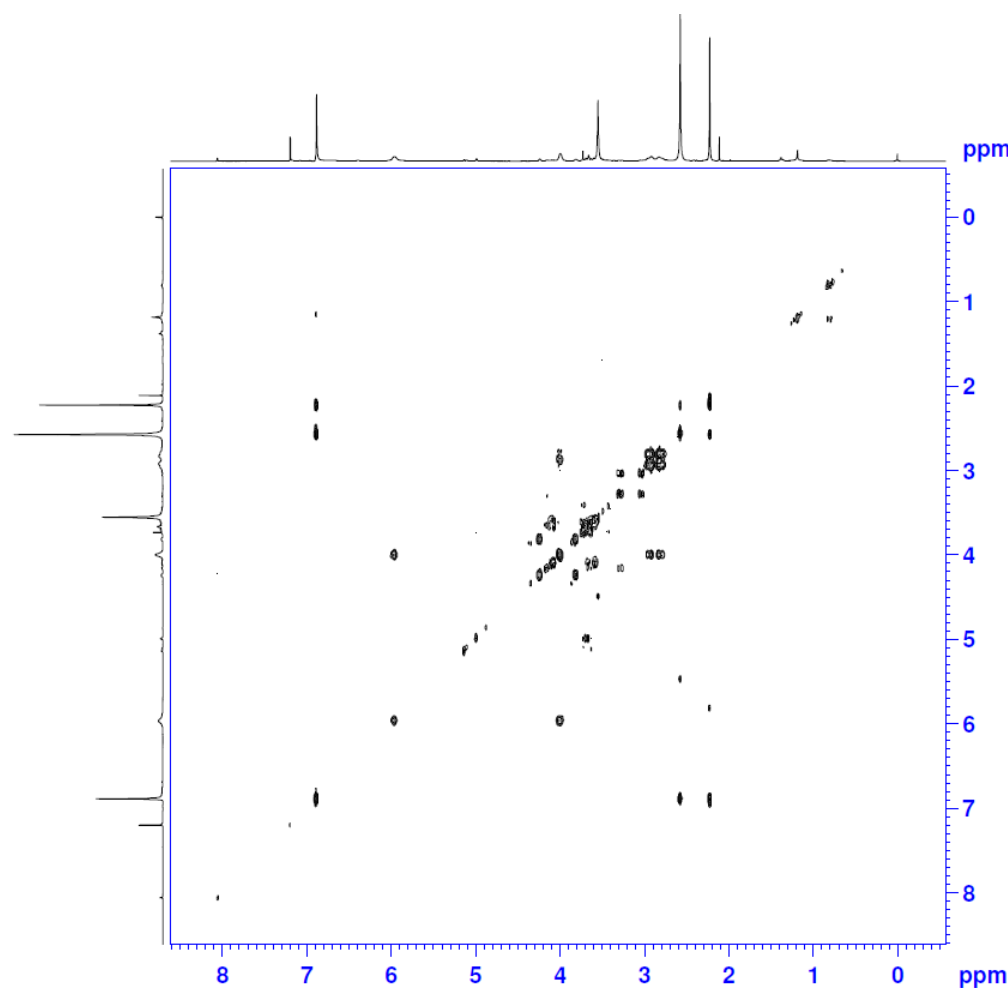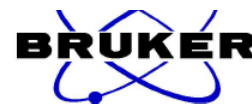

Current Data Parameters  
NAME aet7-75-1  
EXPNO 13  
PROCNO 1

F2 - Acquisition Parameters  
Date\_ 20120316  
Time 3.39  
INSTRUM dpx400  
PROBHD 5 mm QNP 1H/13  
PULPROG cosygmfgf  
TD 2048  
SOLVENT cdcl3  
NS 4  
DS 8  
SWH 3676.471 Hz  
FIDRES 1.795152 Hz  
AQ 0.2785780 sec  
RG 2580.3  
DW 136.000 usec  
DE 6.00 usec  
TE 294.2 K  
D0 0.0000300 sec  
D1 1.91316497 sec  
d13 0.00000400 sec  
D16 0.00020000 sec  
IN0 0.00027200 sec

----- CHANNEL f1 -----  
NUC1 1H  
P1 10.00 usec  
PL1 -1.50 dB  
SFO1 400.1316438 MHz

----- GRADIENT CHANNEL -----  
GPNAM1 SINE.100  
GPNAM2 SINE.100  
GPNAM3 SINE.100  
GPZ1 16.00 %  
GPZ2 12.00 %  
GPZ3 40.00 %  
P16 1000.00 usec

F1 - Acquisition parameters  
ND0 1  
TD 128  
SFO1 400.1316 MHz  
FIDRES 28.722427 Hz  
SW 9.188 ppm  
FMODE QF

F2 - Processing parameters  
SI 1024  
SF 400.1300353 MHz  
WDW SINE  
SSB 0  
LB 0.00 Hz  
GB 0  
PC 1.40

F1 - Processing parameters  
SI 1024  
MC2 QF  
SF 400.1300353 MHz  
WDW SINE  
SSB 0  
LB 0.00 Hz  
GB 0

aet7-75-1

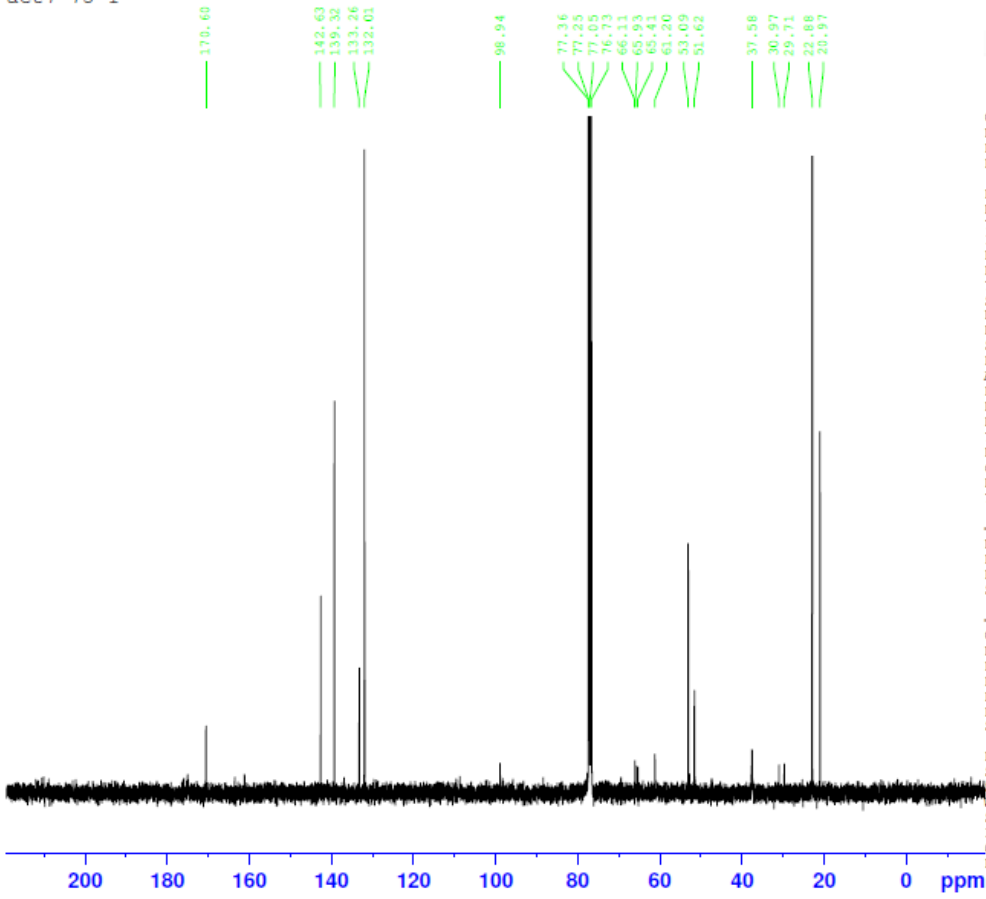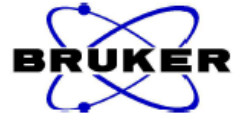

Current Data Parameters  
 NAME aet7-75-1  
 EXPNO 11  
 PROCNO 1

F2 - Acquisition Parameters  
 Date\_ 20120316  
 Time 3.25  
 INSTRUM DPX400  
 PROBHD 5 mm QNP 1H/13  
 PULPROG zgpg30  
 TD 65536  
 SOLVENT CDCl3  
 NS 1024  
 DS 4  
 SWH 23980.814 Hz  
 FIDRES 0.365918 Hz  
 AQ 1.3664756 sec  
 RG 1149.4  
 DW 20.850 usec  
 DE 6.00 usec  
 TE 295.2 K  
 D1 2.00000000 sec  
 d11 0.03000000 sec  
 DELTA 1.89999998 sec  
 TD0 1

----- CHANNEL f1 -----  
 NUC1 13C  
 P1 8.50 usec  
 PL1 -2.60 dB  
 SFO1 100.6228298 MHz

----- CHANNEL f2 -----  
 CPDPRG2 waltz16  
 NUC2 1H  
 PCPD2 80.00 usec  
 PL2 -1.50 dB  
 PL12 17.50 dB  
 PL13 17.50 dB  
 SFO2 400.1316005 MHz

F2 - Processing parameters  
 SI 32768  
 SF 100.6127690 MHz  
 WDW EM  
 SSB 0  
 LB 1.00 Hz  
 GB 0  
 PC 1.40

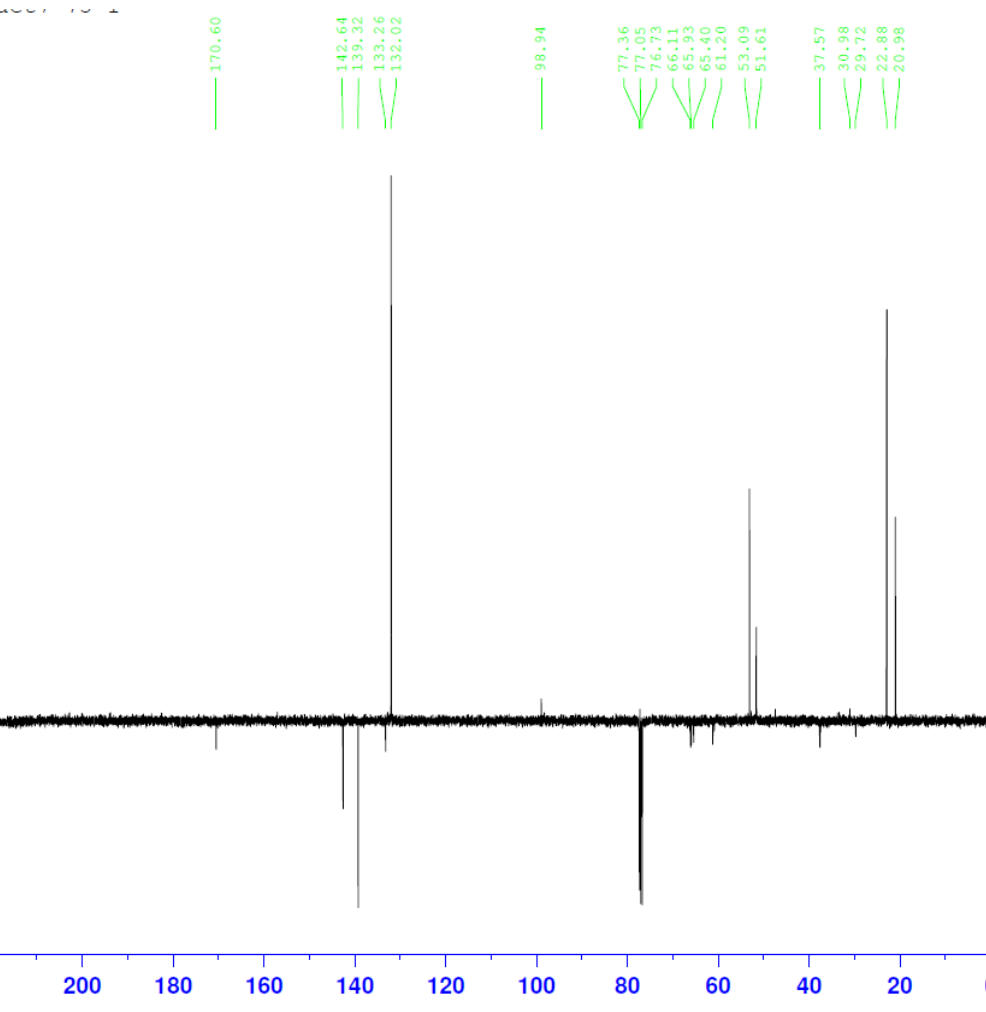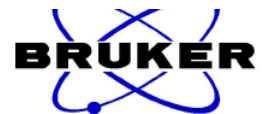

Current Data Parameters  
 NAME aet7-75-1  
 EXPNO 14  
 PROCNO 1

F2 - Acquisition Parameters  
 Date\_ 20120316  
 Time 4.28  
 INSTRUM DPX400  
 PROBHD 5 mm QNP 1H/13  
 PULPROG deptg\_135  
 TD 65536  
 SOLVENT CDCl3  
 NS 512  
 DS 4  
 SWH 23980.814 Hz  
 FIDRES 0.365918 Hz  
 AQ 1.3664756 sec  
 RG 4096  
 DW 20.850 usec  
 DE 6.00 usec  
 TE 294.2 K  
 CNST2 145.0000000  
 D1 2.00000000 sec  
 d2 0.00344828 sec  
 d11 0.03000000 sec  
 DELTA 0.00001082 sec

----- CHANNEL f1 -----  
 NUC1 13C  
 P1 8.50 usec  
 P2 17.00 usec  
 PL1 -2.60 dB  
 SFO1 100.6228300 MHz

----- CHANNEL f2 -----  
 CPDPRG2 waltz16  
 NUC2 1H  
 P3 10.00 usec  
 P4 20.00 usec  
 PCPD2 80.00 usec  
 PL2 -1.50 dB  
 PL12 17.50 dB  
 SFO2 400.1316000 MHz

F2 - Processing parameters  
 SI 32768  
 SF 100.6127690 MHz  
 WDW EM  
 SSB 0  
 LB 1.00 Hz  
 GB 0  
 PC 1.40

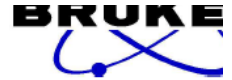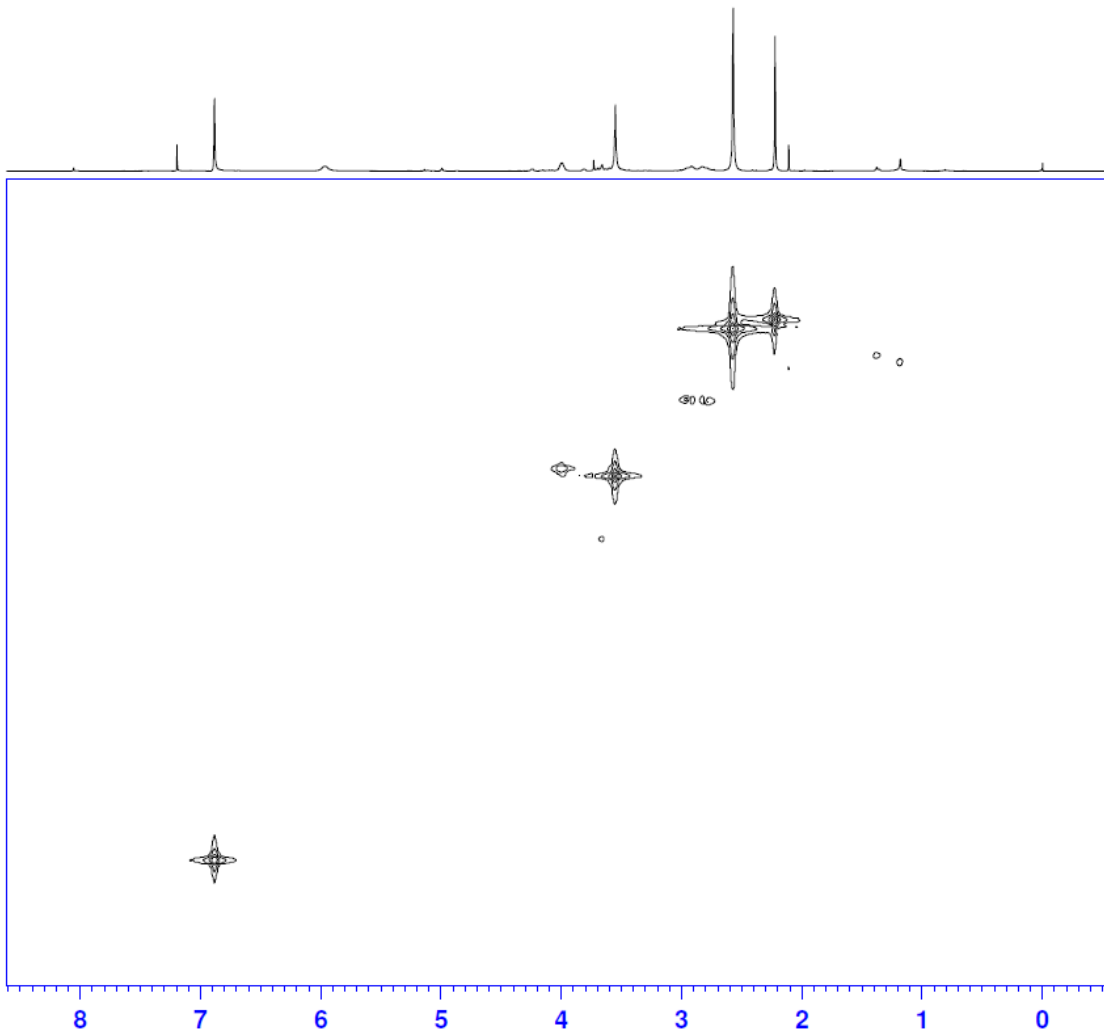

Current Data Parameters  
NAME sat7-75-1  
EXPTNO 15  
PROCNO 1

F2 - Acquisition Parameters  
Date\_ 20120314  
Time 4.30  
INSTRUM DPX400  
PROBHD 5 mm QNP 1H/13  
PULPROG hmqcpgpf  
TD 1024  
SOLVENT cdcl3  
NS 4  
DS 16  
SWH 3676.471 Hz  
FIDRES 3.590303 Hz  
AQ 0.1393140 sec  
RG 26008  
DW 136.000 usec  
DE 6.00 usec  
TE 294.2 K  
CNST2 145.0000000  
d0 0.0000300 sec  
d1 1.48771203 sec  
d2 0.00344828 sec  
d12 0.00002000 sec  
d13 0.00000400 sec  
d16 0.00020000 sec  
DELTA1 0.00222428 sec  
IN0 0.00003000 sec

==== CHANNEL f1 =====  
NUC1 1H  
P1 10.00 usec  
p2 20.00 usec  
PL1 -1.50 dB  
SFO1 400.1316438 MHz

==== CHANNEL f2 =====  
CPDPRG2 gapp  
NUC2 13C  
P3 8.00 usec  
PCPD2 74.00 usec  
PL2 -3.00 dB  
PL12 18.00 dB  
SFO2 100.6203140 MHz

==== GRADIENT CHANNEL =====  
GPNAM1 SINE.100  
GPNAM2 SINE.100  
GPNAM3 SINE.100  
GPZ1 50.00 %  
GPZ2 30.00 %  
GPZ3 40.10 %  
PI6 1000.00 usec

F1 - Acquisition parameters  
ND0 2  
TD 128  
SFO1 100.6203 MHz  
FIDRES 130.208328 Hz  
SW 165.639 ppm  
FRMODE QF

F2 - Processing parameters  
SI 1024  
SF 400.1300353 MHz  
WDW QSINE  
SSB 2  
LB 0.00 Hz  
GB 0  
PC 1.40

F1 - Processing parameters  
SI 1024  
MC2 QF  
SF 100.6127690 MHz  
WDW QSINE  
SSB 2  
LB 0.00 Hz  
GB 0

Methyl *N*<sup>4</sup>-((1*r*\*,3*R*\*)-3-(2-(1,8-naphthyridin-2-yl)ethyl)cyclobutyl)-*N*<sup>2</sup>-(phenylsulfonyl)-*L*-

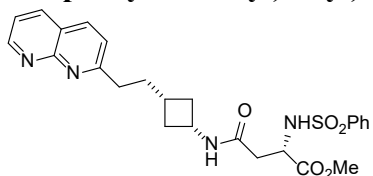

asparaginate [Compound 28]

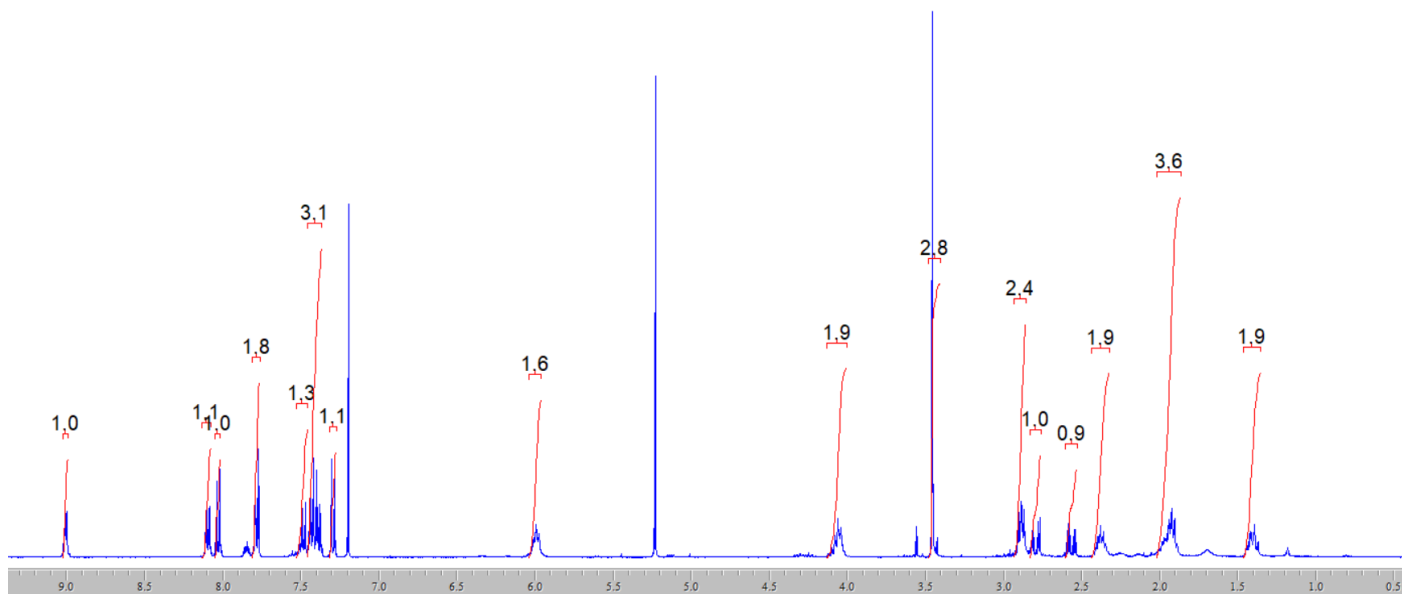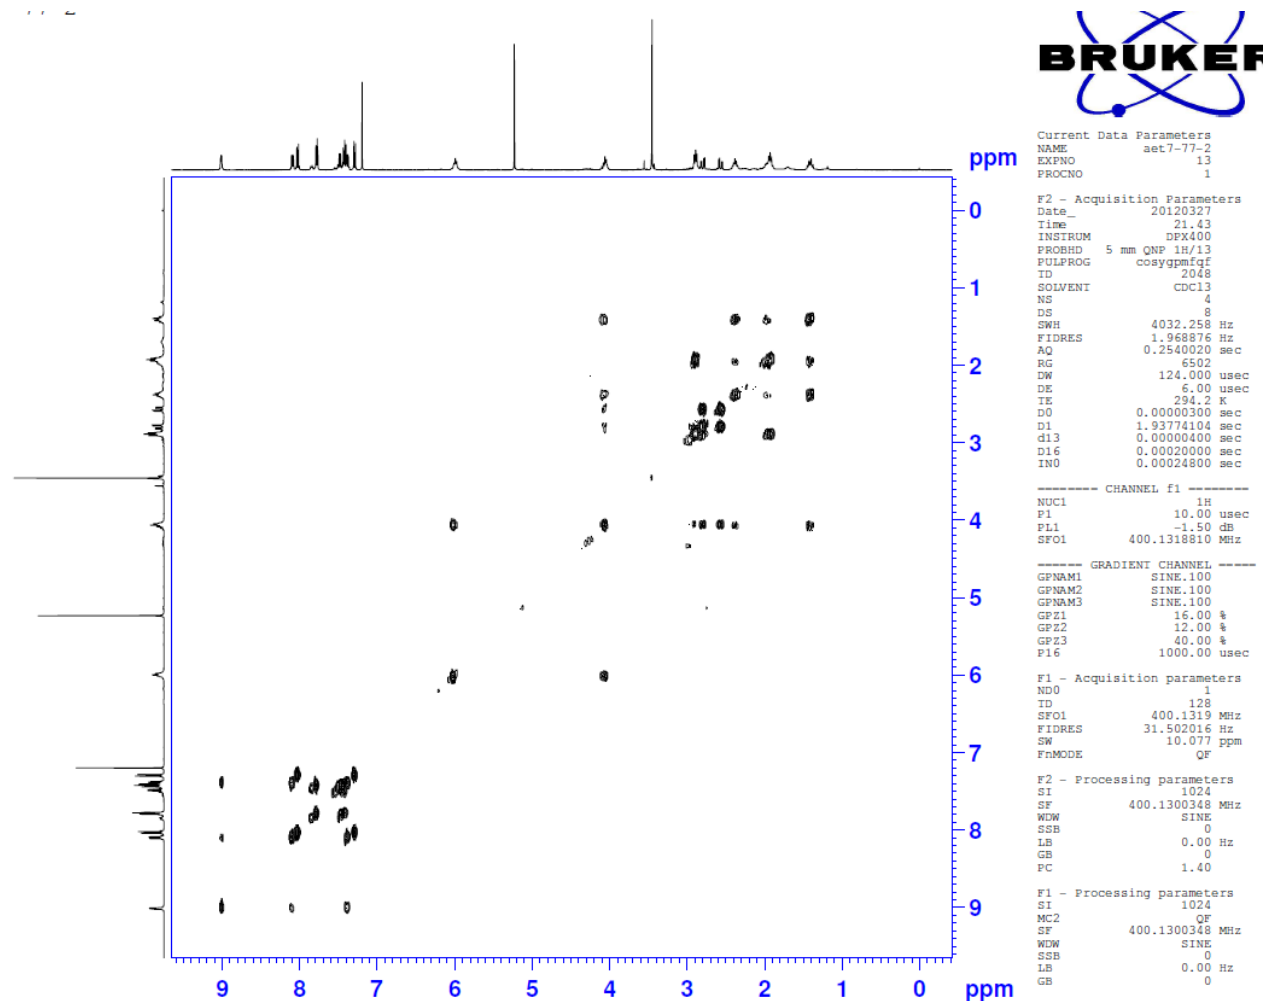

Current Data Parameters  
 NAME set7-77-2  
 EXPNO 13  
 PROCNO 1

F2 - Acquisition Parameters  
 Date\_ 20120327  
 Time 21.43  
 INSTRUM DFX400  
 PROBHD 5 mm QNP 1H/13  
 PULPROG cosygpmfqr  
 TD 2048  
 SOLVENT CDCl3  
 NS 4  
 DS 8  
 SWH 4032.258 Hz  
 FIDRES 1.968876 Hz  
 AQ 0.2540020 sec  
 RG 6502  
 DW 124.000 usec  
 DE 6.00 usec  
 TE 294.2 K  
 D0 0.00000300 sec  
 D1 1.93774104 sec  
 d13 0.00000400 sec  
 D16 0.00020000 sec  
 INO 0.00024800 sec

----- CHANNEL f1 -----  
 NUC1 1H  
 P1 10.00 usec  
 PL1 -1.50 dB  
 SFO1 400.1318810 MHz

----- GRADIENT CHANNEL -----  
 GPNAM1 SINE.100  
 GPNAM2 SINE.100  
 GPNAM3 SINE.100  
 GPZ1 16.00 %  
 GPZ2 12.00 %  
 GPZ3 40.00 %  
 P16 1000.00 usec

F1 - Acquisition parameters  
 ND0 1  
 TD 128  
 SFO1 400.1319 MHz  
 FIDRES 31.502016 Hz  
 SW 10.077 ppm  
 FbMODE QF

F2 - Processing parameters  
 SI 1024  
 SF 400.1300348 MHz  
 WDW SINE  
 SSB 0  
 LB 0.00 Hz  
 GB 0  
 PC 1.40

F1 - Processing parameters  
 SI 1024  
 MC2 QF  
 SF 400.1300348 MHz  
 WDW SINE  
 SSB 0  
 LB 0.00 Hz  
 GB 0



aet7-77-2

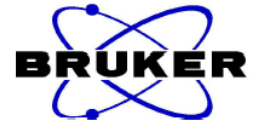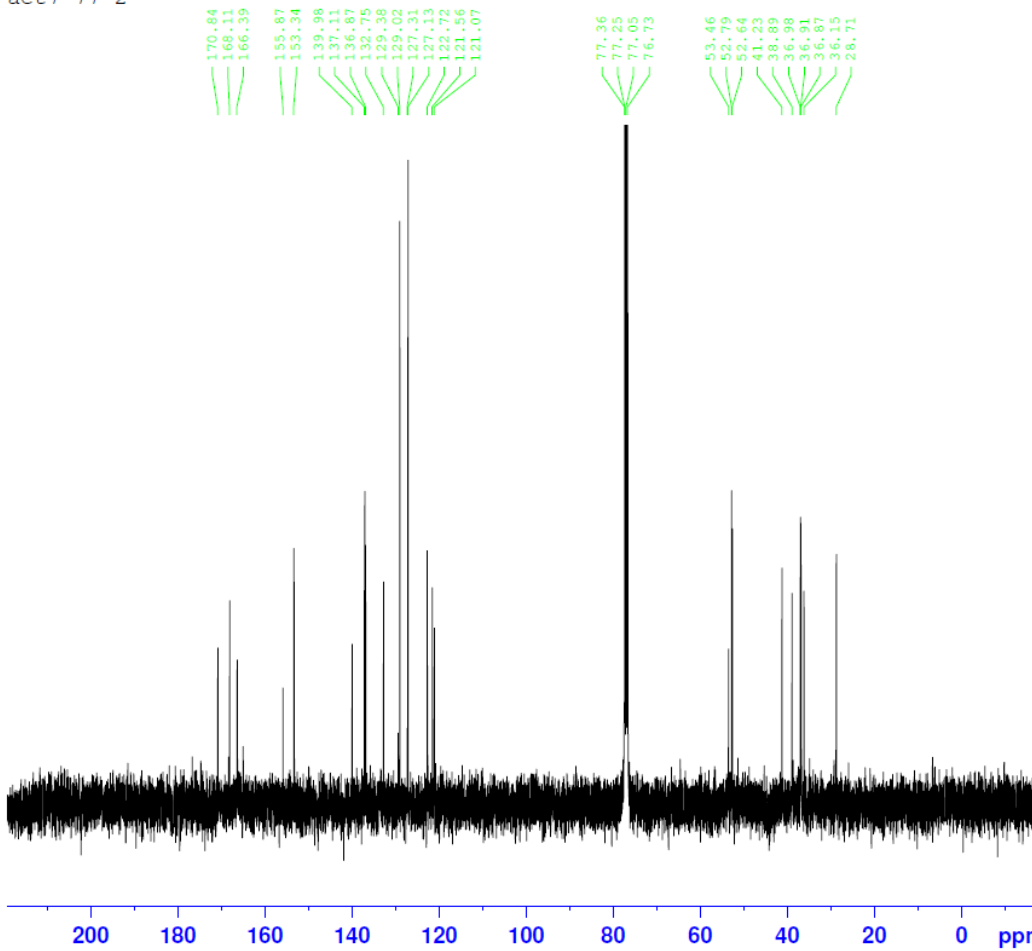

Current Data Parameters  
 NAME aet7-77-2  
 EXPNO 11  
 PROCNO 1

F2 - Acquisition Parameters  
 Date\_ 20120327  
 Time 21.12  
 INSTRUM DPX400  
 PROBHD 5 mm QNP 1H/13  
 PULPROG zgpg30  
 TD 65536  
 SOLVENT CDCl3  
 NS 1024  
 DS 4  
 SWH 23980.814 Hz  
 FIDRES 0.365918 Hz  
 AQ 1.3664756 sec  
 RG 724.1  
 DW 20.850 usec  
 DE 6.00 usec  
 TE 294.2 K  
 D1 2.00000000 sec  
 d11 0.03000000 sec  
 DELTA 1.89999998 sec  
 TD0 1

===== CHANNEL f1 =====  
 NUC1 13C  
 P1 8.50 usec  
 PL1 -2.60 dB  
 SFO1 100.6228298 MHz

===== CHANNEL f2 =====  
 CPDPRG2 waltz16  
 NUC2 1H  
 PCPD2 80.00 usec  
 PL2 -1.50 dB  
 PL12 17.50 dB  
 PL13 17.50 dB  
 SFO2 400.1316005 MHz

F2 - Processing parameters  
 SI 32768  
 SF 100.6127690 MHz  
 WDW EM  
 SSB 0  
 LB 1.00 Hz  
 GB 0  
 PC 1.40

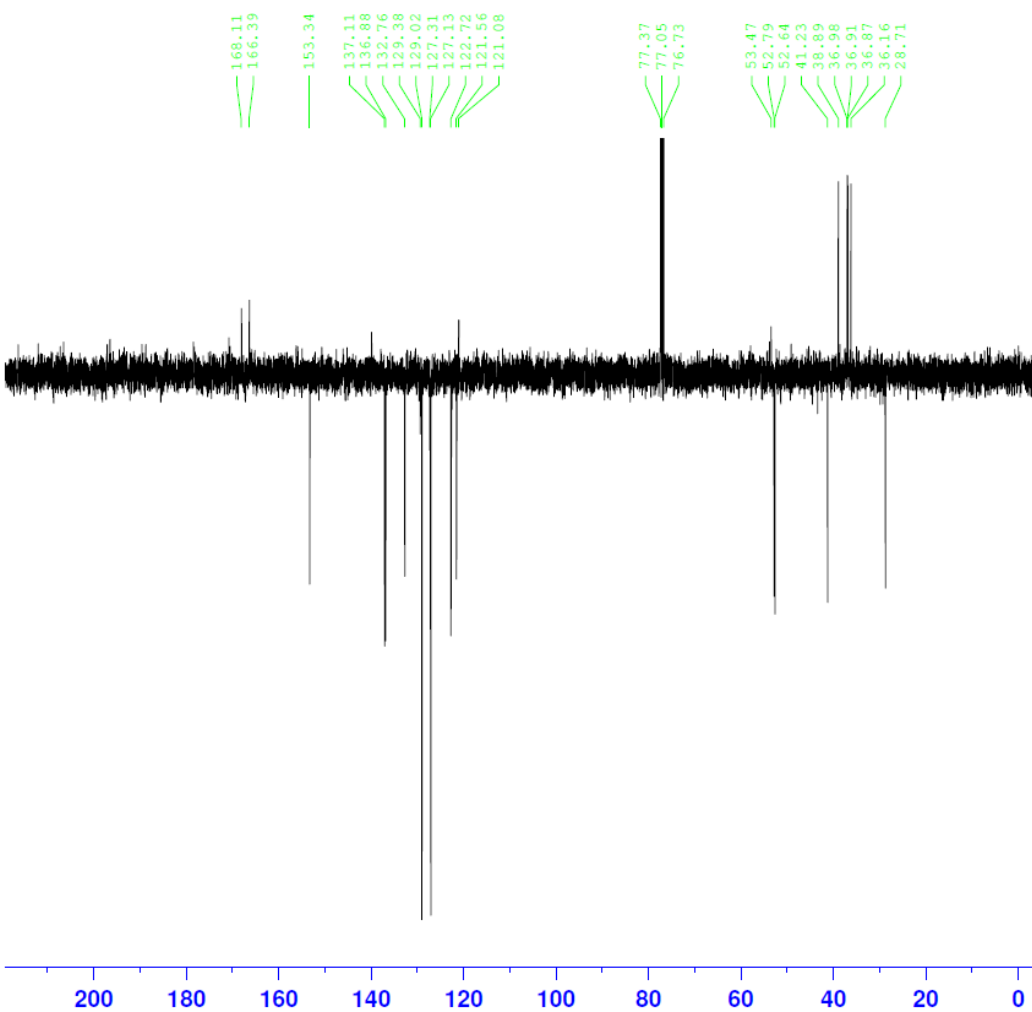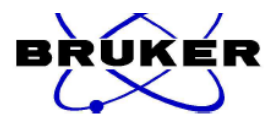

Current Data Parameters  
 NAME aet7-77-2  
 EXPNO 12  
 PROCNO 1

F2 - Acquisition Parameters  
 Date\_ 20120327  
 Time 21.42  
 INSTRUM DPX400  
 PROBHD 5 mm QNP 1H/13  
 PULPROG deptq\_135  
 TD 65536  
 SOLVENT CDCl3  
 NS 512  
 DS 4  
 SWH 23980.814 Hz  
 FIDRES 0.365918 Hz  
 AQ 1.3664756 sec  
 RG 11585.2  
 DW 20.850 usec  
 DE 6.00 usec  
 TE 294.2 K  
 CNST2 145.0000000  
 D1 2.00000000 sec  
 d2 0.00344828 sec  
 D11 0.03000000 sec  
 DELTA 0.00001082 sec

===== CHANNEL f1 =====  
 NUC1 13C  
 P1 8.50 usec  
 P2 17.00 usec  
 PL1 -2.60 dB  
 SFO1 100.6228300 MHz

===== CHANNEL f2 =====  
 CPDPRG2 waltz16  
 NUC2 1H  
 P3 10.00 usec  
 P4 20.00 usec  
 PCPD2 80.00 usec  
 PL2 -1.50 dB  
 PL12 17.50 dB  
 SFO2 400.1316000 MHz

F2 - Processing parameters  
 SI 32768  
 SF 100.6127690 MHz  
 WDW EM  
 SSB 0  
 LB 1.00 Hz  
 GB 0  
 PC 1.40

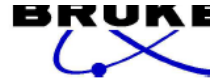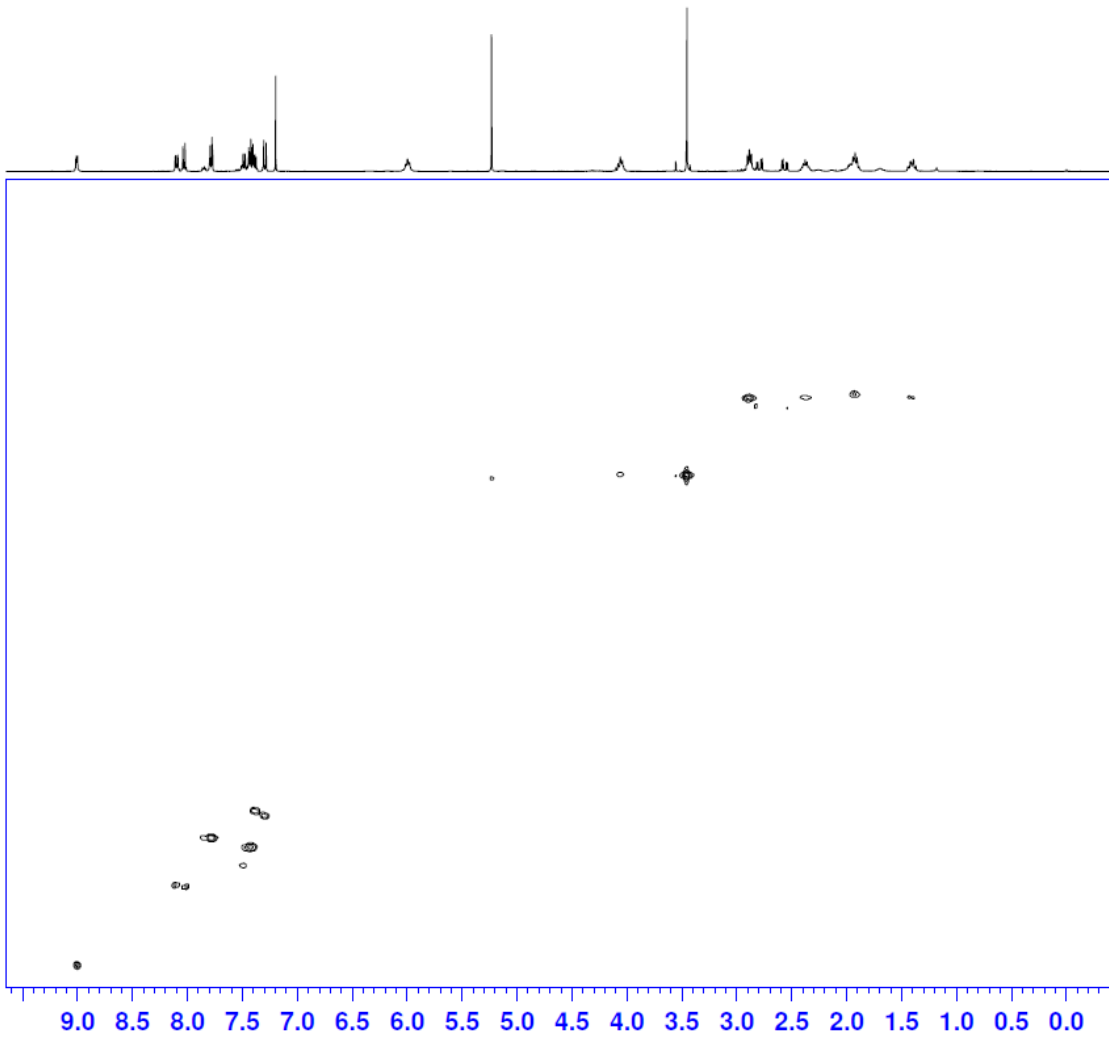

Current Data Parameters  
NAME act7-77-2  
EXPNO 14  
PROCNO 1

F2 - Acquisition Parameters  
Data\_ 20120327  
Time 22.03  
INSTRUM dpx400  
PROBHD 5 mm QNP 1H/13  
PULPROG zgpg30  
TD 1024  
SOLVENT cdcl3  
NS 4  
DS 16  
SWH 4032.258 Hz  
FIDRES 3.937752 Hz  
AQ 0.1270260 sec  
RG 9195.2  
DW 124.000 usec  
DE 6.00 usec  
TE 294.2 K  
CNS12 145.000000  
d0 0.00000000 sec  
d1 1.50000000 sec  
d2 0.00344828 sec  
d12 0.00020000 sec  
d13 0.00000400 sec  
d16 0.00020000 sec  
DELTA1 0.00222428 sec  
IN0 0.00030000 sec

==== CHANNEL F1 =====  
NUC1 13  
P1 10.00 usec  
p2 20.00 usec  
PL1 -1.50 dB  
SFO1 400.1318810 MHz

==== CHANNEL F2 =====  
CPDPRG2 gprp  
NUC2 13  
P3 8.00 usec  
PCPD2 74.00 usec  
PL2 -5.00 dB  
PL12 18.00 dB  
SFO2 100.6203140 MHz

==== GRADIENT CHANNEL =====  
GPNAM1 SINE.100  
GPNAM2 SINE.100  
GPNAM3 SINE.100  
GPZ1 50.00 %  
GPZ2 30.00 %  
GPZ3 40.10 %  
P16 1000.00 usec

F1 - Acquisition parameters  
ND0 2  
TD 128  
SFO1 100.6203 MHz  
FIDRES 130.208328 Hz  
SW 165.639 ppm  
FMODE QF

F2 - Processing parameters  
SI 1024  
SF 400.1300348 MHz  
WFV QSINE  
SSB 2  
LB 0.00 Hz  
GB 0  
PC 1.40

F1 - Processing parameters  
SI 1024  
MC2 QF  
SF 100.6127690 MHz  
WFV QSINE  
SSB 2  
LB 0.00 Hz  
GB 0

Methyl *N*<sup>4</sup>-((1*r*\*,3*R*\*)-3-(2-(1,8-naphthyridin-2-yl)ethyl)cyclobutyl)-*N*<sup>2</sup>-(mesitylsulfonyl)-*L*-

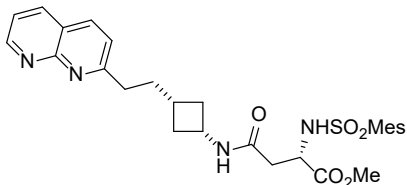

asparaginate [Compound 29]

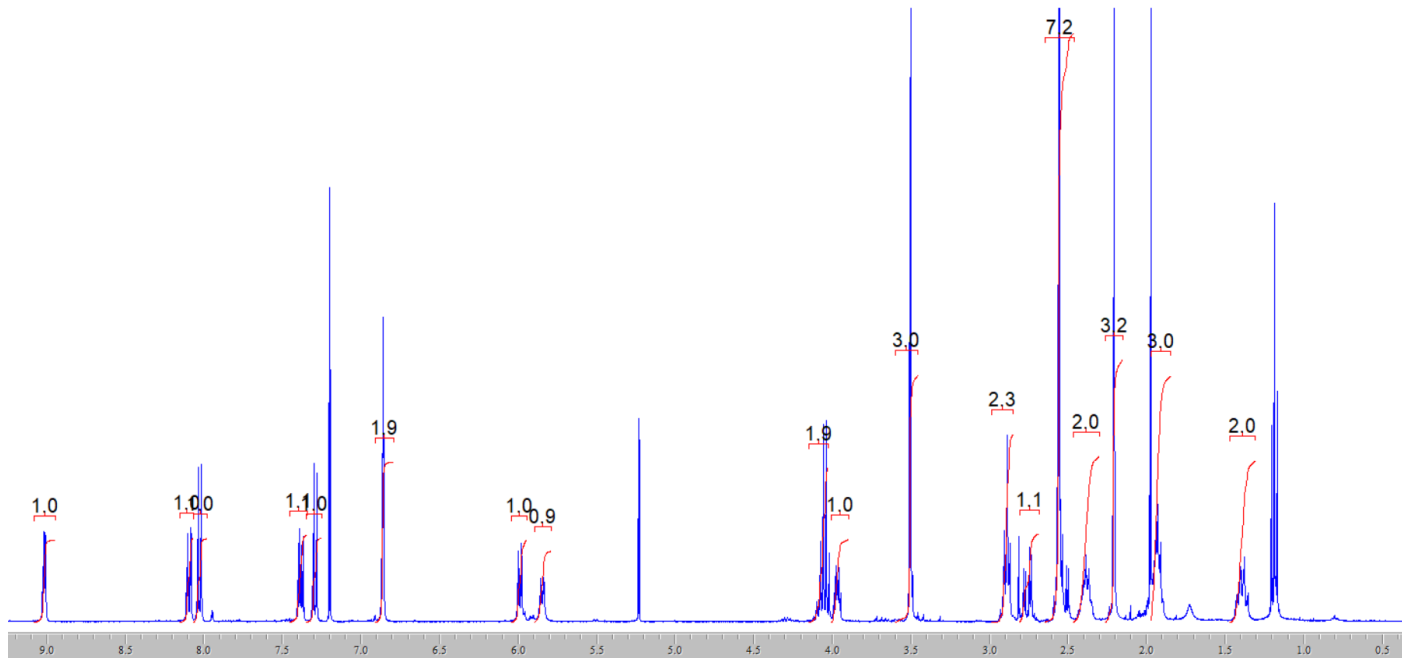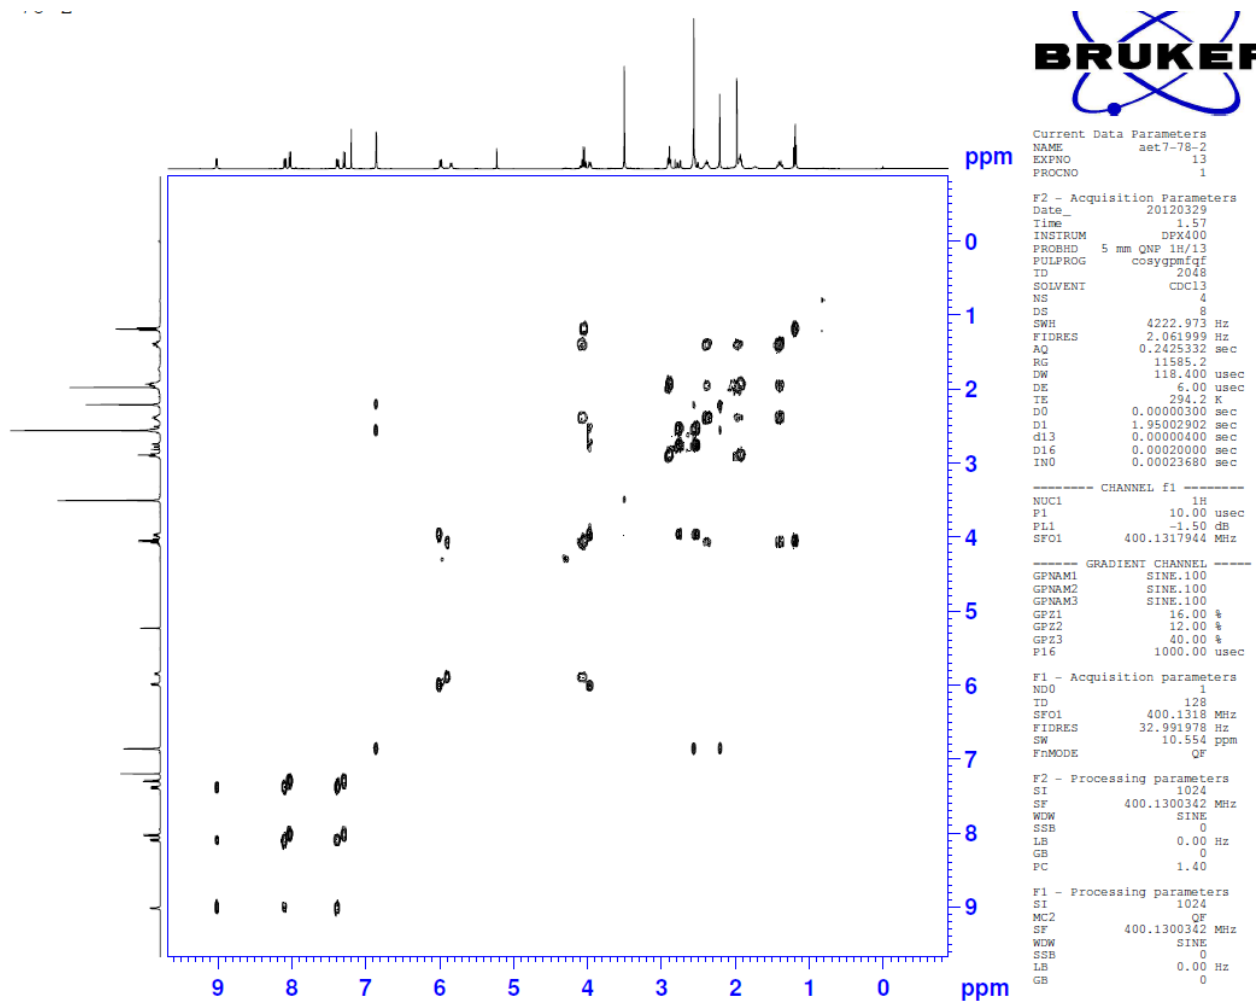

aet7-78-2

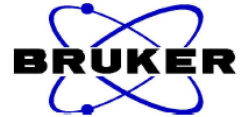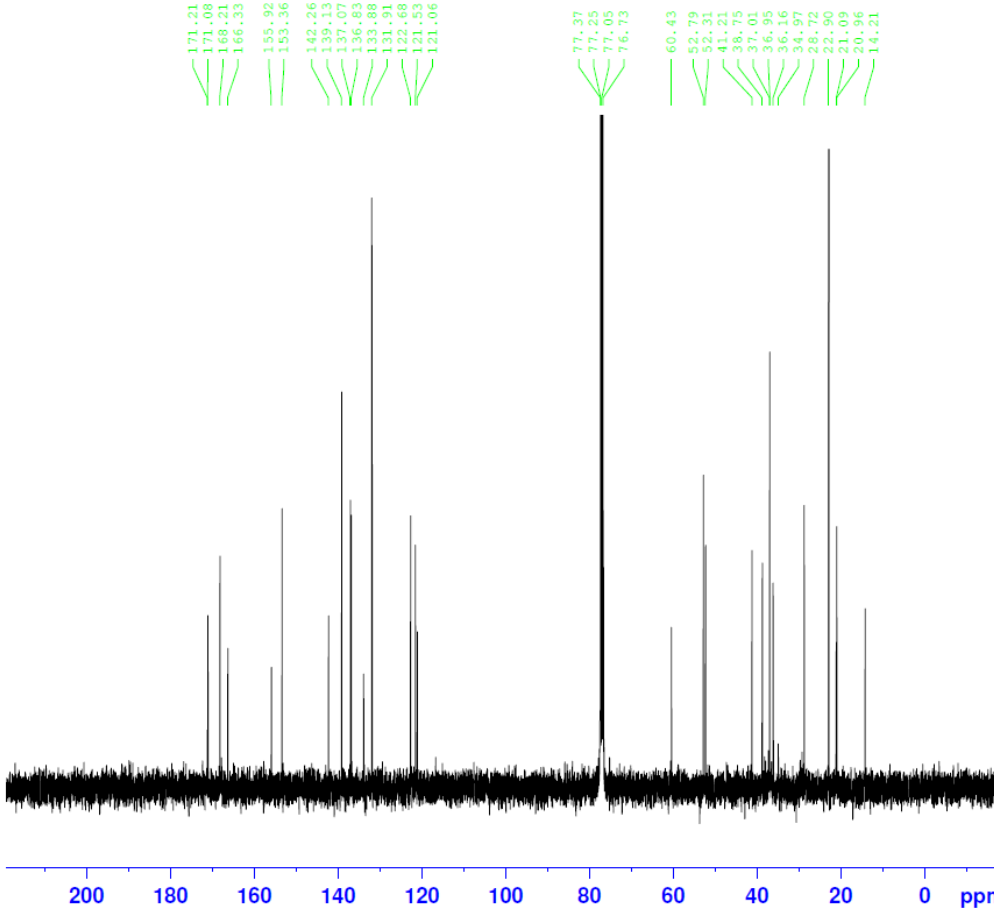

Current Data Parameters  
 NAME aet7-78-2  
 EXPNO 11  
 PROCNO 1

F2 - Acquisition Parameters  
 Date\_ 20120329  
 Time 1.26  
 INSTRUM DPX400  
 PROBHD 5 mm QNP 1H/13  
 PULPROG zgpg30  
 TD 65536  
 SOLVENT CDC13  
 NS 1024  
 DS 4  
 SWH 23980.814 Hz  
 FIDRES 0.365918 Hz  
 AQ 1.3664756 sec  
 RG 812.7  
 DW 20.850 usec  
 DE 6.00 usec  
 TE 294.2 K  
 D1 2.00000000 sec  
 d11 0.03000000 sec  
 DELTA 1.89999999 sec  
 TD0 1

===== CHANNEL f1 =====  
 NUC1 13C  
 P1 8.50 usec  
 PL1 -2.60 dB  
 SFO1 100.6228298 MHz

===== CHANNEL f2 =====  
 CPDPRG2 waltz16  
 NUC2 1H  
 PCPD2 80.00 usec  
 PL2 -1.50 dB  
 PL12 17.50 dB  
 PL13 17.50 dB  
 SFO2 400.1316005 MHz

F2 - Processing parameters  
 SI 32768  
 SF 100.6127690 MHz  
 WDW EM  
 SSB 0  
 LB 1.00 Hz  
 GB 0  
 PC 1.40

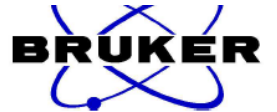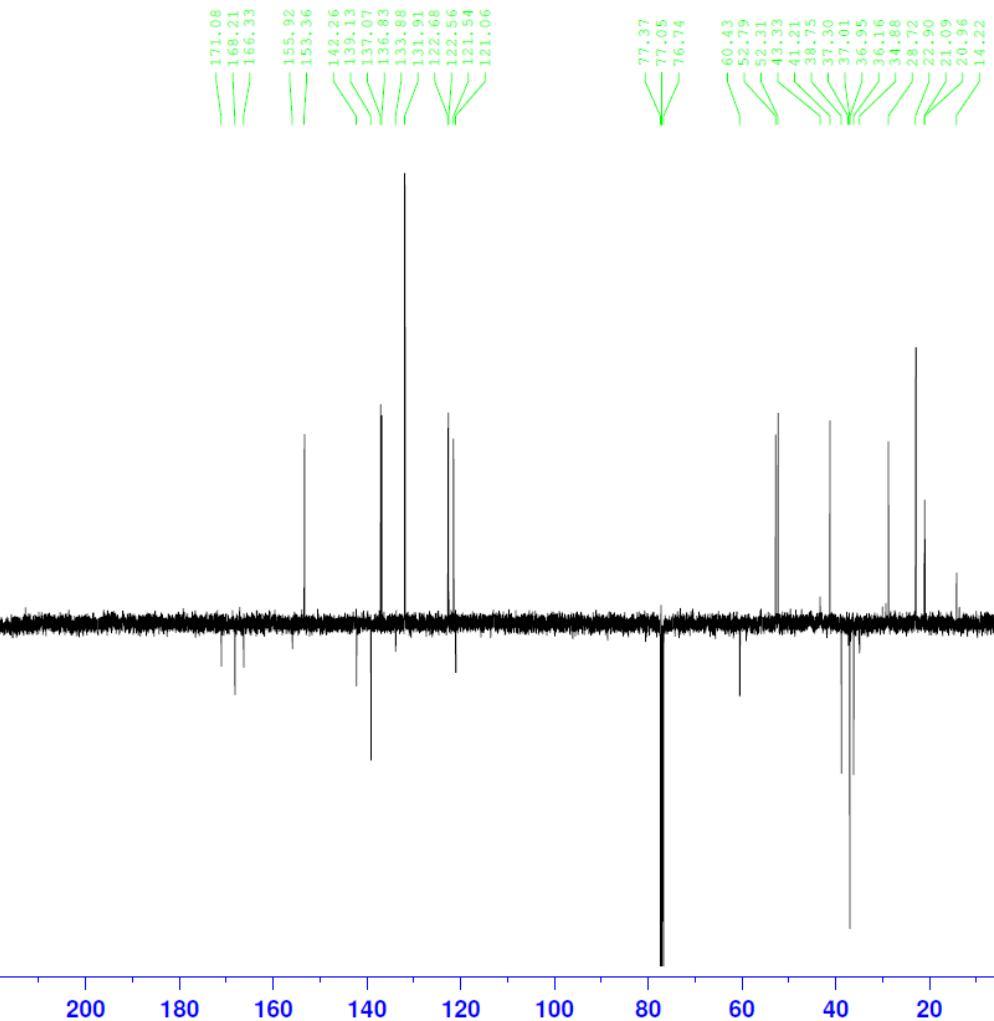

Current Data Parameters  
 NAME aet7-78-2  
 EXPNO 12  
 PROCNO 1

F2 - Acquisition Parameter:  
 Date\_ 20120329  
 Time 1.56  
 INSTRUM DPX400  
 PROBHD 5 mm QNP 1H/13  
 PULPROG deptq\_135  
 TD 65536  
 SOLVENT CDC13  
 NS 512  
 DS 4  
 SWH 23980.814 Hz  
 FIDRES 0.365918 Hz  
 AQ 1.3664756 sec  
 RG 11585.2  
 DW 20.850 usec  
 DE 6.00 usec  
 TE 294.2 K  
 CNST2 145.0000000  
 D1 2.00000000 sec  
 d2 0.00344828 sec  
 D11 0.03000000 sec  
 DELTA 0.00001082 sec

===== CHANNEL f1 =====  
 NUC1 13C  
 P1 8.50 usec  
 P2 17.00 usec  
 PL1 -2.60 dB  
 SFO1 100.6228300 MH:

===== CHANNEL f2 =====  
 CPDPRG2 waltz16  
 NUC2 1H  
 P3 10.00 usec  
 P4 20.00 usec  
 PCPD2 80.00 usec  
 PL2 -1.50 dB  
 PL12 17.50 dB  
 SFO2 400.1316000 MH:

F2 - Processing parameters  
 SI 32768  
 SF 100.6127690 MH:  
 WDW EM  
 SSB 0  
 LB 1.00 Hz  
 GB 0  
 PC 1.40

Current Data Parameters  
 NAME act7-78-2  
 EXPNO 14  
 PROCNO 1

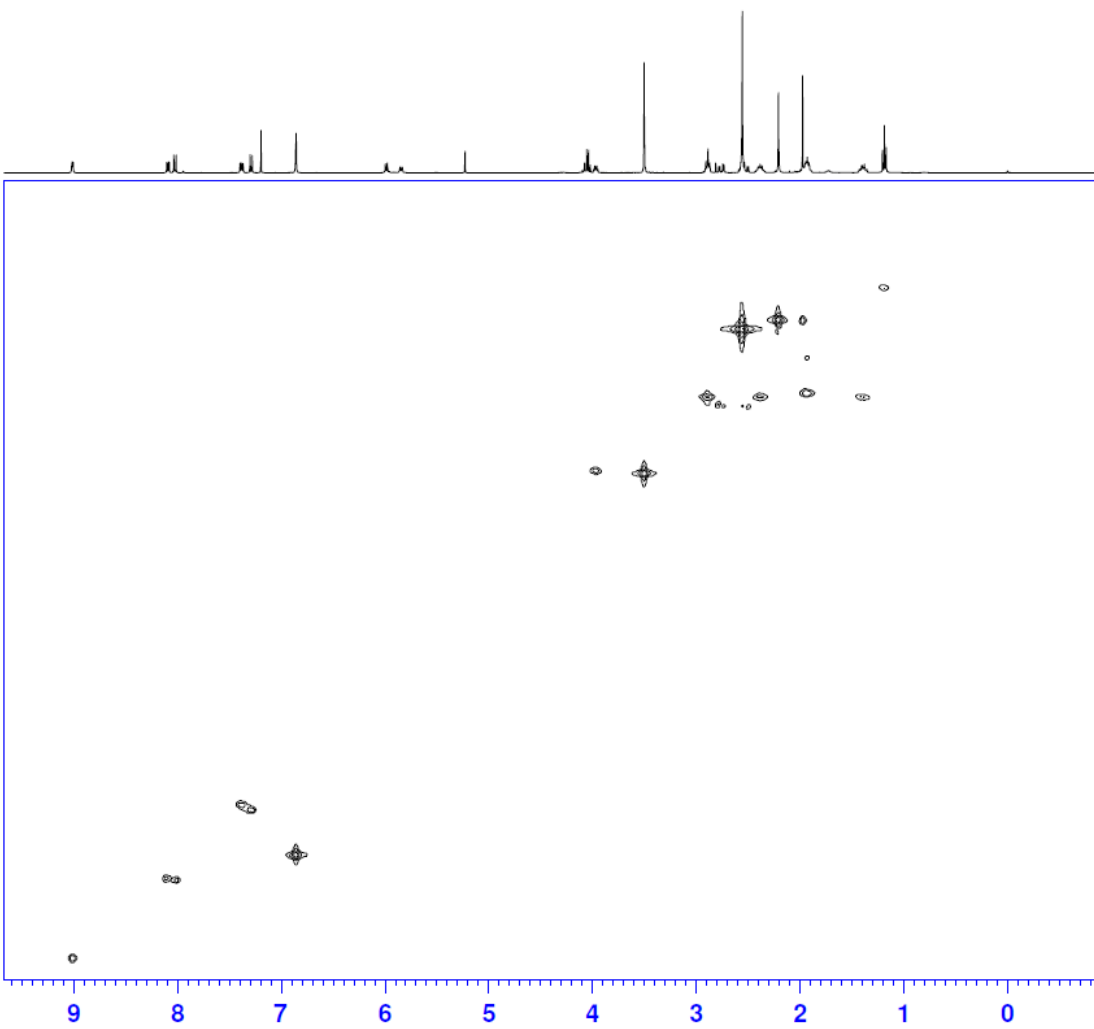

F2 - Acquisition Parameters  
 Data 20120329  
 Time 2.17  
 INSTRUM DFX400  
 PROBHD 5 mm QNP 1H/13  
 PULPROG zgpg30  
 ID 1024  
 SOLVENT cdc13  
 NS 4  
 DS 16  
 SWH 4222.973 Hz  
 FIDRES 4.123997 Hz  
 AQ 0.1212916 sec  
 RG 5160.6  
 DW 118.400 usec  
 DE 6.00 usec  
 TE 294.2 K  
 CNST2 145.000000  
 c0 0.0000300 sec  
 D1 1.50614405 sec  
 p2 0.00344828 sec  
 d12 0.00002000 sec  
 d13 0.00000400 sec  
 D16 0.00020000 sec  
 DELTAT1 0.0022423 sec  
 INO 0.00003000 sec

==== CHANNEL f1 =====  
 NUC1 1H  
 P1 10.00 usec  
 p2 20.00 usec  
 PL1 -1.50 dB  
 SFO1 400.1317944 MHz

==== CHANNEL f2 =====  
 CPDPRG2 garp  
 NUC2 13C  
 P3 8.00 usec  
 PCPD2 74.00 usec  
 PL2 -3.00 dB  
 PL12 18.00 dB  
 SFO2 100.6203140 MHz

==== GRADIENT CHANNEL =====  
 GPNAM1 SINE.100  
 GPNAM2 SINE.100  
 GPNAM3 SINE.100  
 GPZ1 50.00 %  
 GPZ2 30.00 %  
 GPZ3 40.10 %  
 P16 1000.00 usec

F1 - Acquisition parameters  
 ND0 2  
 ID 128  
 SFO1 100.6203 MHz  
 FIDRES 130.208328 Hz  
 SW 145.639 ppm  
 PRMODE QF

F2 - Processing parameters  
 SI 1024  
 SF 400.1300342 MHz  
 WDW QSINE  
 SSB 2  
 LB 0.00 Hz  
 GB 0  
 PC 1.40

F1 - Processing parameters  
 SI 1024  
 MC2 QF  
 SF 100.6127690 MHz  
 WDW QSINE  
 SSB 2  
 LB 0.00 Hz  
 GB 0

*N*-((*S*)-1-((1*r*\*,3*R*\*)-3-(2-(1,8-Naphthyridin-2-yl)ethyl)cyclobutyl)-2,5-dioxopyrrolidin-3-

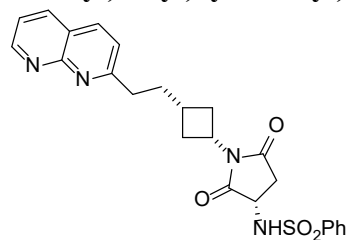

yl)benzenesulfonamide [Compound 30]

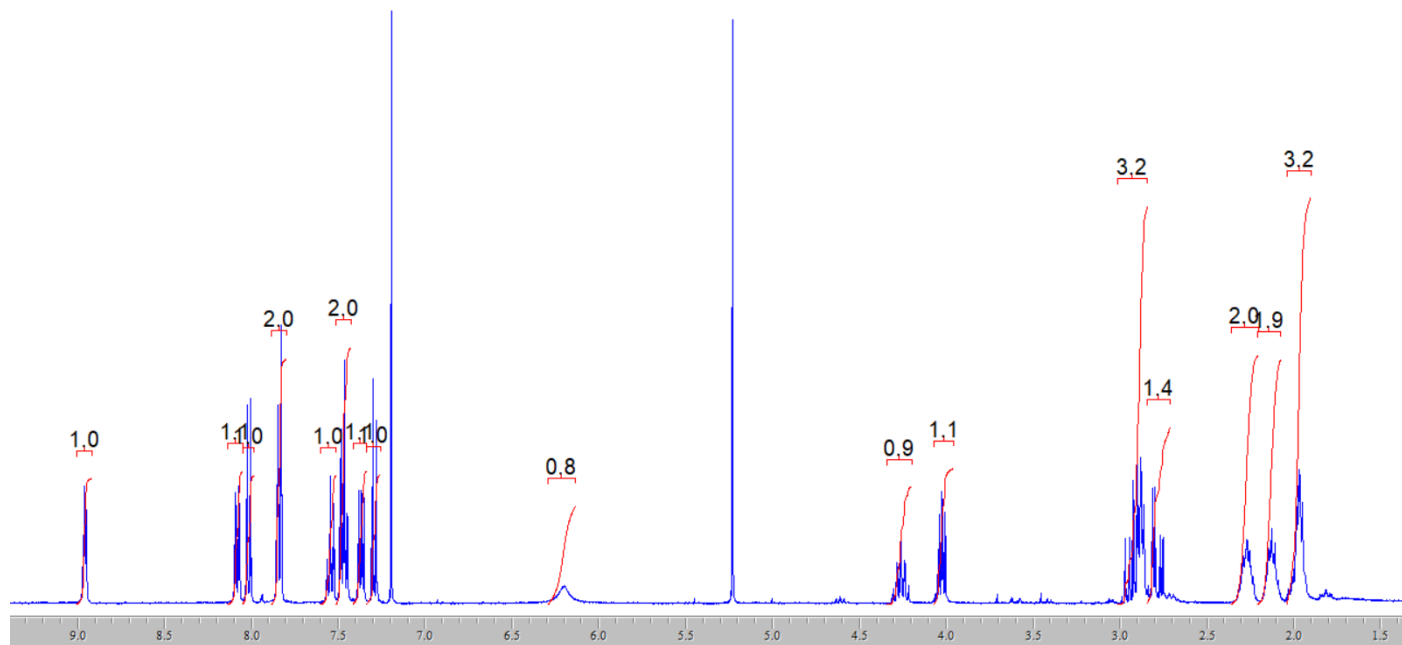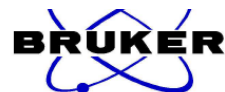

Current Data Parameters  
 NAME: acet7-77-1  
 EXFNO: 13  
 PROCNO: 1

F2 - Acquisition Parameters  
 Date\_: 20120327  
 Time: 19.34  
 INSTRUM: DPX400  
 PROBHD: 5 mm QNP 1H/13  
 PULPROG: cosygmfzgpg  
 TD: 2048  
 SOLVENT: CDCl3  
 NS: 4  
 DS: 8  
 SWH: 4222.973 Hz  
 FIDRES: 2.061999 Hz  
 AQ: 0.2425332 sec  
 RG: 502  
 DW: 118.400 usec  
 DE: 5.00 usec  
 TE: 294.2 K  
 D0: 0.00000300 sec  
 D1: 1.95002902 sec  
 d12: 0.00009400 sec  
 D15: 0.00020000 sec  
 INU: 0.00023680 sec

----- CHANNEL f1 -----  
 NUC1: 1H  
 P1: 10.00 usec  
 PL1: -1.50 dB  
 SF01: 400.1317724 MHz

----- GRADIENT CHANNEL -----  
 GPMAM1: SINE.100  
 GPMAM2: SINE.100  
 GPMAM3: SINE.100  
 GPZ1: 16.00 %  
 GPZ2: 12.00 %  
 GPZ3: 40.00 %  
 P16: 1000.00 usec

F1 - Acquisition parameters  
 NDO: 1  
 TD: 128  
 SF01: 400.1318 MHz  
 FIDRES: 32.991978 Hz  
 SW: 10.554 ppm  
 FMODE: QF

F2 - Processing parameters  
 SI: 1024  
 SF: 400.1300350 MHz  
 WDW: SINE  
 SSB: 0  
 LB: 0.00 Hz  
 GB: 0  
 PC: 1.40

F1 - Processing parameters  
 SI: 1024  
 MC2: QF  
 SF: 400.1300350 MHz  
 WDW: SINE  
 SSB: 0  
 LB: 0.00 Hz  
 GB: 0

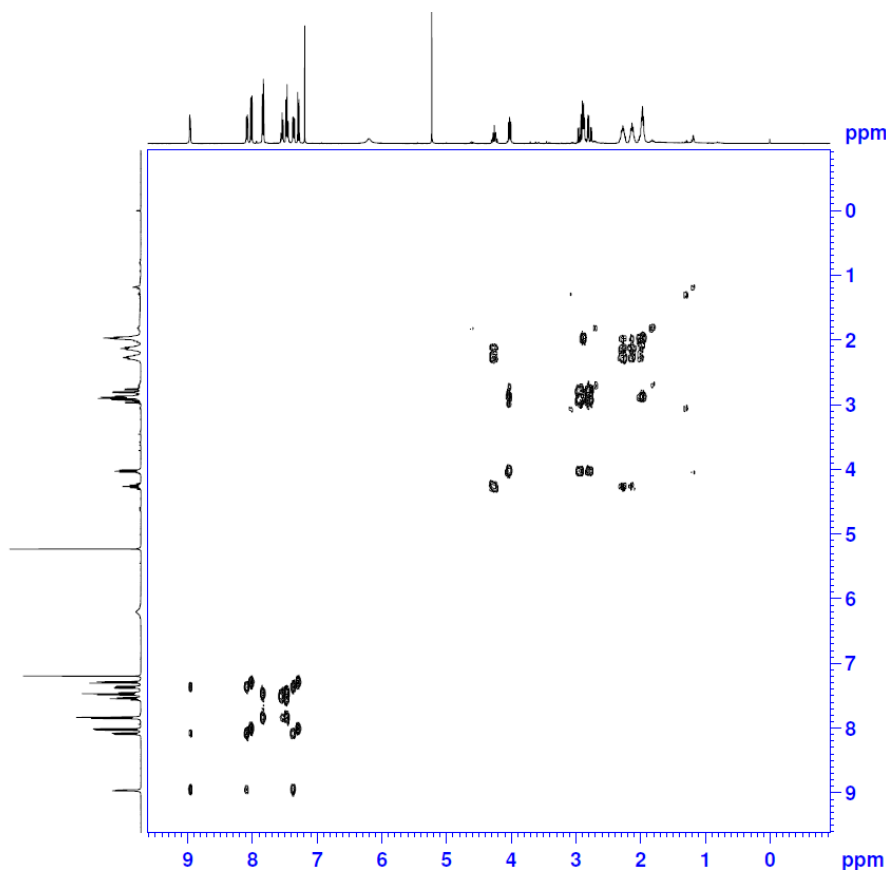

aet7-77-1

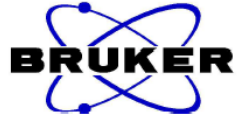

Current Data Parameters  
NAME aet7-77-1  
EXPNO 11  
PROCNO 1

F2 - Acquisition Parameters  
Date\_ 20120327  
Time 19.03  
INSTRUM DPX400  
PROBHD 5 mm QNP 1H/13  
PULPROG zgpg30  
TD 65536  
SOLVENT CDCl3  
NS 1024  
DS 4  
SWH 23980.814 Hz  
FIDRES 0.365918 Hz  
AQ 1.3664756 sec  
RG 724.1  
DW 20.850 usec  
DE 6.00 usec  
TE 294.2 K  
D1 2.00000000 sec  
d11 0.03000000 sec  
DELTA 1.89999998 sec  
TDO 1

===== CHANNEL f1 =====  
NUC1 13C  
P1 8.50 usec  
PL1 -2.60 dB  
SFO1 100.6228298 MHz

===== CHANNEL f2 =====  
CPDPRG2 waltz16  
NUC2 1H  
PCPD2 80.00 usec  
PL2 -1.50 dB  
PL12 17.50 dB  
PL13 17.50 dB  
SFO2 400.1316005 MHz

F2 - Processing parameters  
SI 32768  
SF 100.6127690 MHz  
WDW EM  
SSB 0  
LB 1.00 Hz  
GB 0  
PC 1.40

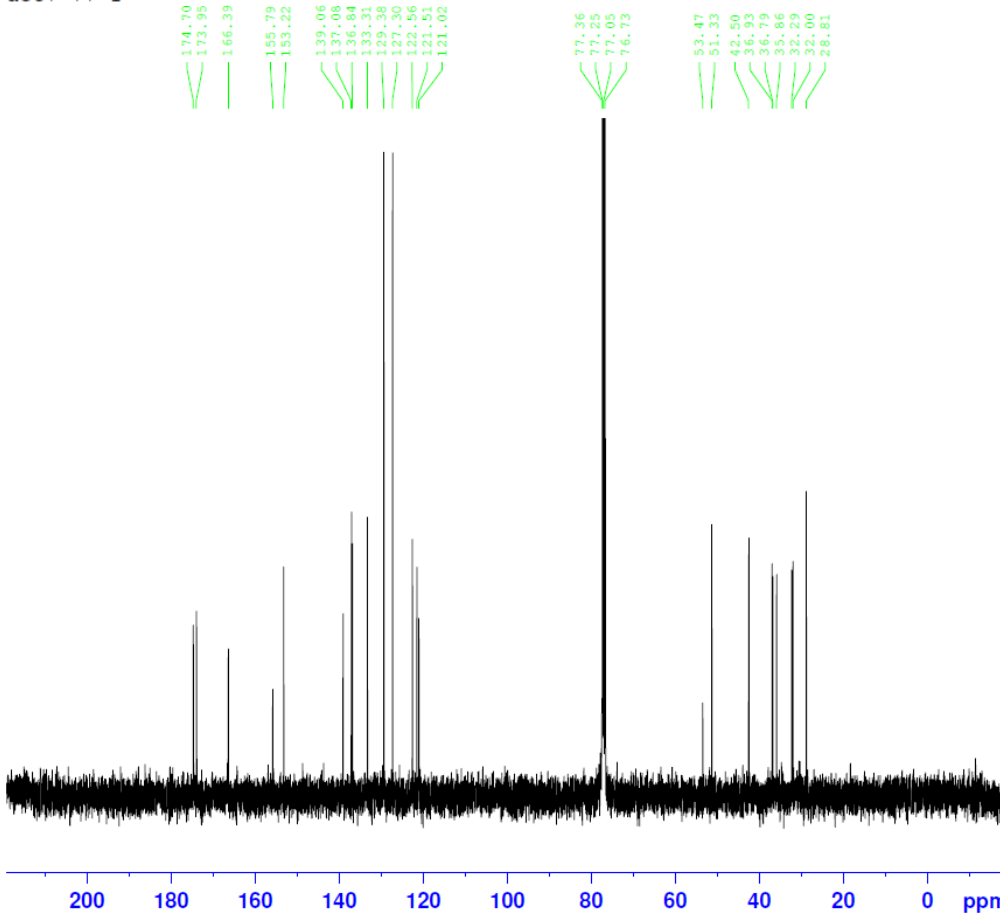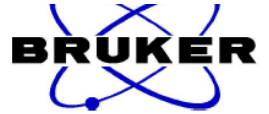

Current Data Parameters  
NAME aet7-77-1  
EXPNO 12  
PROCNO 1

F2 - Acquisition Parameters  
Date\_ 20120327  
Time 19.33  
INSTRUM DPX400  
PROBHD 5 mm QNP 1H/13  
PULPROG deptq\_135  
TD 65536  
SOLVENT CDCl3  
NS 512  
DS 4  
SWH 23980.814 Hz  
FIDRES 0.365918 Hz  
AQ 1.3664756 sec  
RG 11585.2  
DW 20.850 usec  
DE 6.00 usec  
TE 294.2 K  
CNST2 145.0000000  
D1 2.00000000 sec  
d2 0.00344828 sec  
D11 0.03000000 sec  
DELTA 0.00001082 sec

===== CHANNEL f1 =====  
NUC1 13C  
P1 8.50 usec  
P2 17.00 usec  
PL1 -2.60 dB  
SFO1 100.6228300 MHz

===== CHANNEL f2 =====  
CPDPRG2 waltz16  
NUC2 1H  
P3 10.00 usec  
P4 20.00 usec  
PCPD2 80.00 usec  
PL2 -1.50 dB  
PL12 17.50 dB  
SFO2 400.1316000 MHz

F2 - Processing parameters  
SI 32768  
SF 100.6127690 MHz  
WDW EM  
SSB 0  
LB 1.00 Hz  
GB 0  
PC 1.40

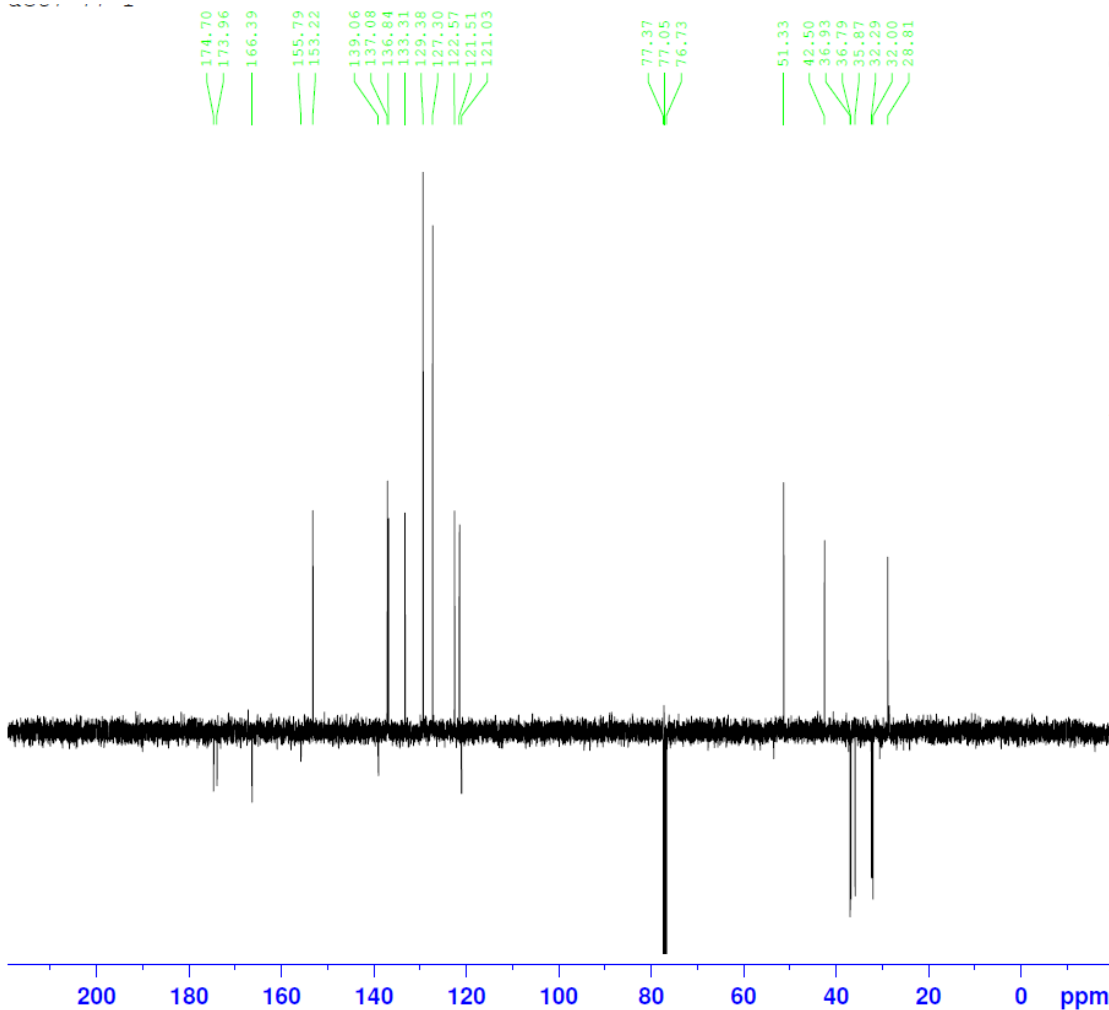

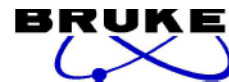

Current Data Parameters  
NAME sat7-77-1  
EXFNO 14  
PROCNO 1

F2 - Acquisition Parameters  
Date 20120327  
Time 19.54

INSTRUM DFX400  
PROBHD 5 mm QNP 1H/13  
PULPROG hmqcpgpgf  
TD 1024  
SOLVENT ccc13  
NS 4  
DS 16  
SWH 4222.973 Hz  
FIDRES 4.123997 Hz  
AQ 0.1212916 sec  
RG 26008  
RW 118.400 usec  
DE 6.00 usec  
TE 294.2 K  
CNST2 145.000000  
d0 0.0000300 sec  
d1 1.50614405 sec  
d2 0.00344828 sec  
d12 0.00002000 sec  
d13 0.00000400 sec  
D16 0.00020000 sec  
DELTA1 0.0023428 sec  
IN0 0.00003000 sec

==== CHANNEL f1 =====  
NUC1 1H  
P1 10.00 usec  
p2 20.00 usec  
PL1 -1.50 dB  
SFO1 400.1317724 MHz

==== CHANNEL f2 =====  
CPDPRG2 gqcp  
NUC2 13C  
P3 8.00 usec  
PCPD2 74.00 usec  
PL2 -3.00 dB  
PL12 18.00 dB  
SFO2 100.6203140 MHz

==== GRADIENT CHANNEL =====  
GFNAME1 SINE.100  
GFNAME2 SINE.100  
GFNAME3 SINE.100  
GPZ1 50.00 %  
GPZ2 30.00 %  
GPZ3 40.10 %  
P16 1000.00 usec

F1 - Acquisition parameters  
ND0 2  
TD 128  
SFO1 100.6203 MHz  
FIDRES 130.208328 Hz  
SW 163.639 ppm  
FMODE QF

F2 - Processing parameters  
SI 1024  
SF 400.1300350 MHz  
WDW Q81NK  
SFB 2  
LB 0.00 Hz  
GB 0  
PC 1.40

F1 - Processing parameters  
SI 1024  
MC2 QF  
SF 100.6127690 MHz  
WDW Q81NK  
SFB 2  
LB 0.00 Hz  
GB 0

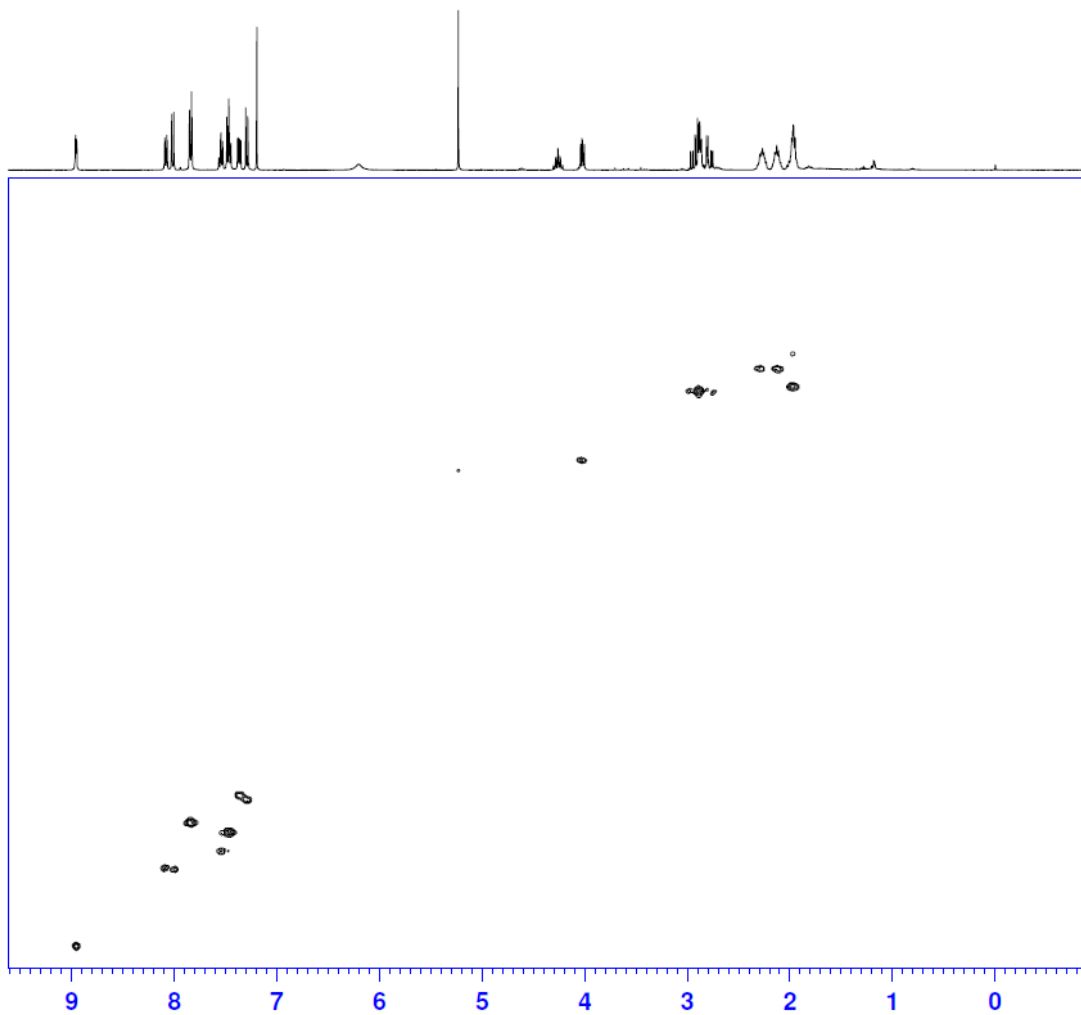



*N*-((*S*)-1-((1*r*\*,3*R*\*)-3-(2-(1,8-Naphthyridin-2-yl)ethyl)cyclobutyl)-2,5-dioxopyrrolidin-3-yl)-2,4,6-

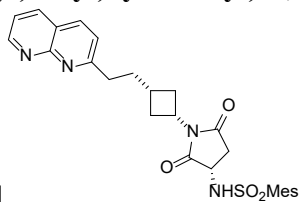

trimethylbenzenesulfonamide [Compound 31]

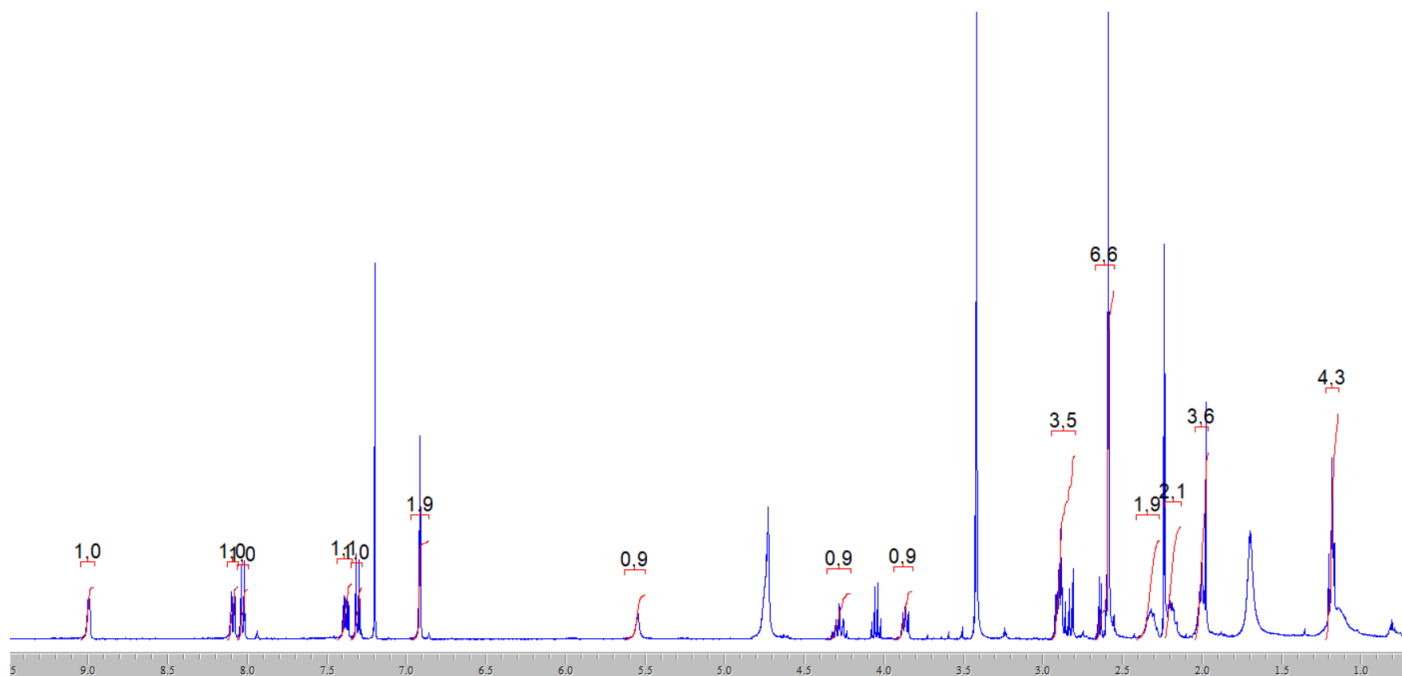

0.7 0.1

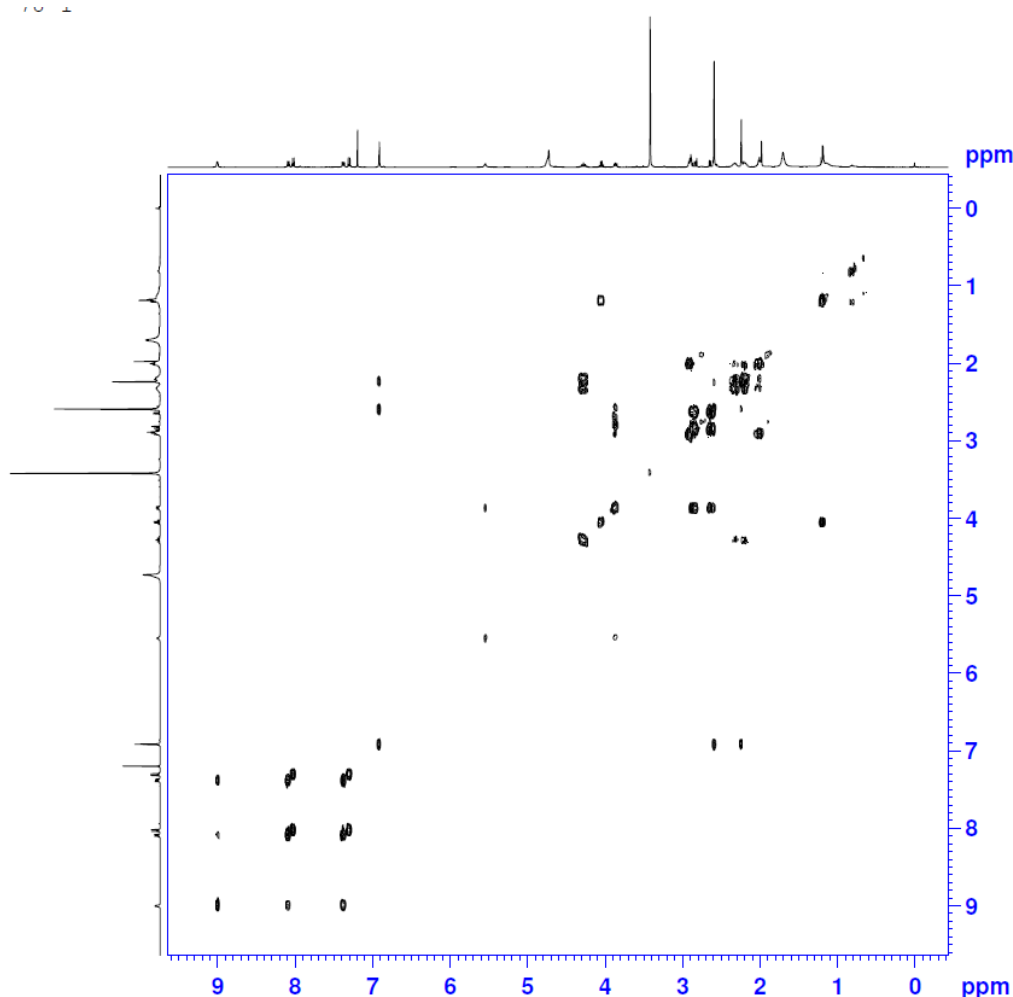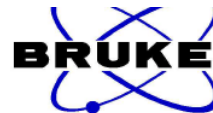

Current Data Parameters  
NAME set7-78-1  
EXPNO 13  
PROCNO 1

F2 - Acquisition Parameters  
Date\_ 20120328  
Time 23.49  
INSTRUM DFX400  
PROBHD 5 mm QNP 1H/13  
PULPROG cosygpmzg5  
ID 2048  
SOLVENT CDCl3  
NS 4  
DS 8  
SWH 4032.258 Hz  
FIDRES 1.968876 Hz  
AQ 0.2540020 sec  
RG 8192  
DW 124.000 usec  
DE 6.00 usec  
TE 294.2 K  
D0 0.00000300 sec  
D1 1.93774104 sec  
d13 0.00000400 sec  
D16 0.00020000 sec  
IN0 0.00024800 sec

----- CHANNEL f1 -----  
NUC1 13  
P1 10.00 usec  
PL1 -1.50 dB  
SF01 400.1318765 MHz

----- GRADIENT CHANNEL -----  
GPNAM1 SINE.100  
GPNAM2 SINE.100  
GPNAM3 SINE.100  
GPZ1 16.00 %  
GPZ2 12.00 %  
GPZ3 40.00 %  
P16 1000.00 usec

F1 - Acquisition parameters  
ND0 1  
ID 128  
SF01 400.1319 MHz  
FIDRES 31.502016 Hz  
SW 10.077 ppm  
F1MODE QF

F2 - Processing parameters  
SI 1024  
SF 400.1300339 MHz  
WDW SINE  
SSB 0  
LB 0.00 Hz  
GB 0  
FC 1.40

F1 - Processing parameters  
SI 1024  
MC2 QF  
SF 400.1300339 MHz  
WDW SINE  
SSB 0  
LB 0.00 Hz  
GB 0

aet7-78-1

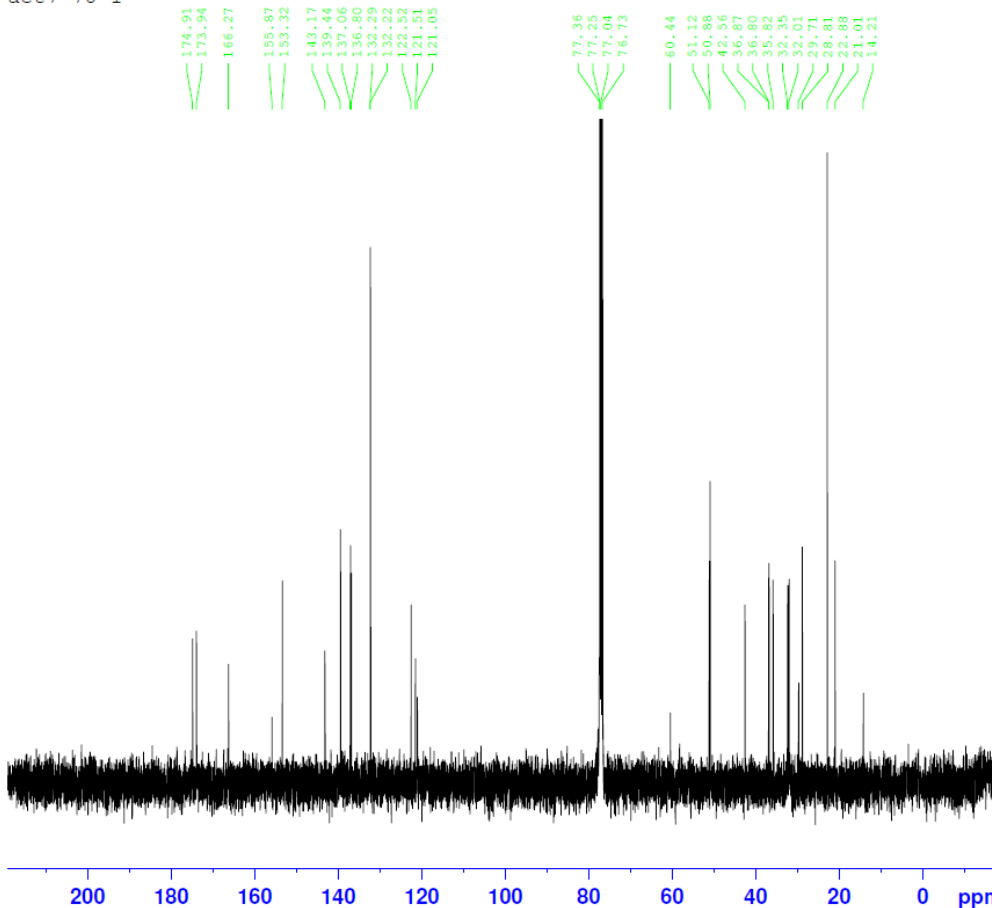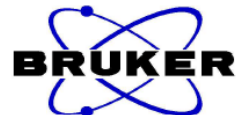

Current Data Parameters  
 NAME aet7-78-1  
 EXPNO 11  
 PROCNO 1

F2 - Acquisition Parameters  
 Date\_ 20120328  
 Time 23.18  
 INSTRUM DPX400  
 PROBHD 5 mm QNP 1H/13  
 PULPROG zgpg30  
 TD 65536  
 SOLVENT CDCl3  
 NS 1024  
 DS 4  
 SWH 23980.814 Hz  
 FIDRES 0.365918 Hz  
 AQ 1.3664756 sec  
 RG 724.1  
 DW 20.850 usec  
 DE 6.00 usec  
 TE 295.2 K  
 D1 2.00000000 sec  
 d11 0.03000000 sec  
 DELTA 1.89999998 sec  
 TD0 1

===== CHANNEL f1 =====  
 NUC1 13C  
 P1 8.50 usec  
 PL1 -2.60 dB  
 SFO1 100.6228298 MHz

===== CHANNEL f2 =====  
 CPDPRG2 waltz16  
 NUC2 1H  
 PCPD2 80.00 usec  
 PL2 -1.50 dB  
 PL12 17.50 dB  
 PL13 17.50 dB  
 SFO2 400.1316005 MHz

F2 - Processing parameters  
 SI 32768  
 SF 100.6127690 MHz  
 WDW EM  
 SSB 0  
 LB 1.00 Hz  
 GB 0  
 PC 1.40

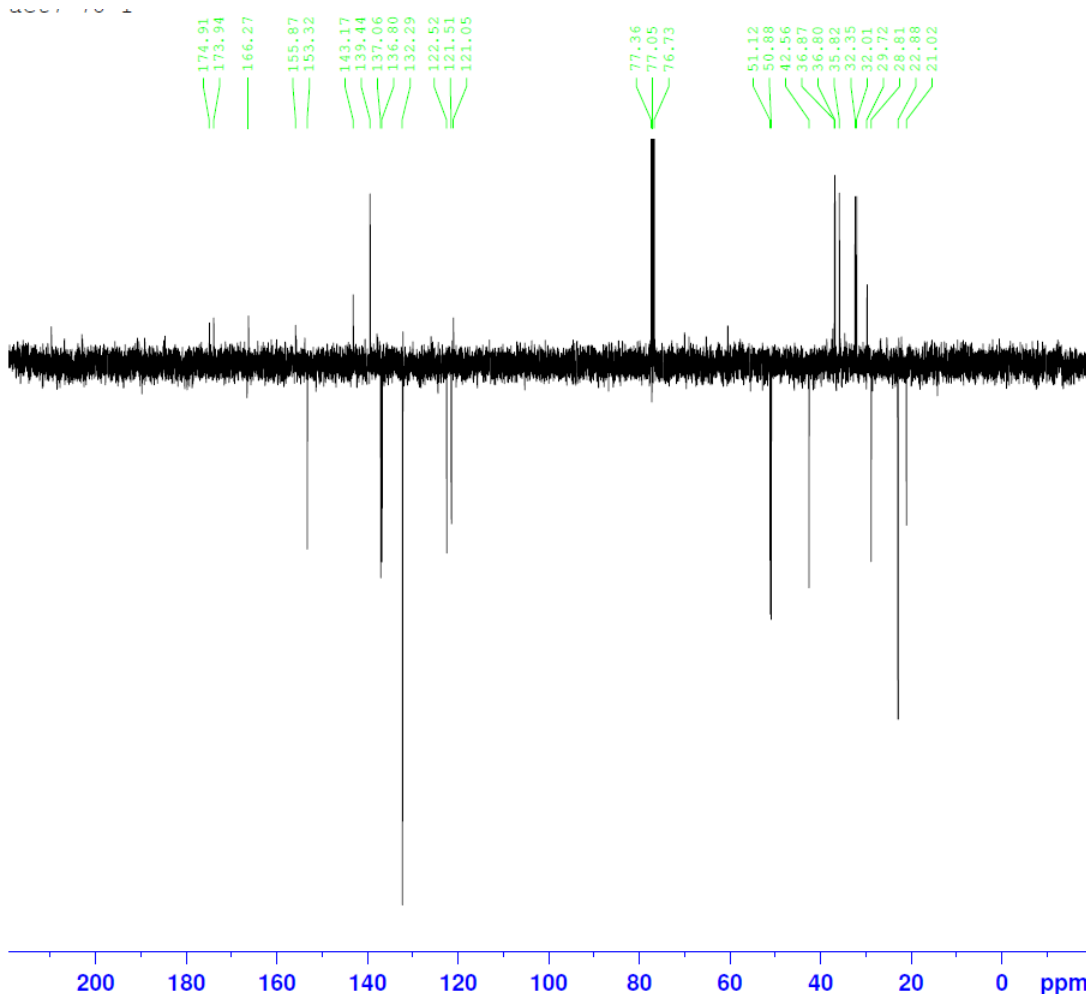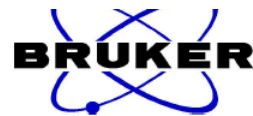

Current Data Parameters  
 NAME aet7-78-1  
 EXPNO 12  
 PROCNO 1

F2 - Acquisition Parameters  
 Date\_ 20120328  
 Time 23.48  
 INSTRUM DPX400  
 PROBHD 5 mm QNP 1H/13  
 PULPROG deptq\_135  
 TD 65536  
 SOLVENT CDCl3  
 NS 512  
 DS 4  
 SWH 23980.814 Hz  
 FIDRES 0.365918 Hz  
 AQ 1.3664756 sec  
 RG 11585.2  
 DW 20.850 usec  
 DE 6.00 usec  
 TE 294.2 K  
 CNST2 145.0000000  
 D1 2.00000000 sec  
 d2 0.00344828 sec  
 D11 0.03000000 sec  
 DELTA 0.00001082 sec

===== CHANNEL f1 =====  
 NUC1 13C  
 P1 8.50 usec  
 P2 17.00 usec  
 PL1 -2.60 dB  
 SFO1 100.6228300 MHz

===== CHANNEL f2 =====  
 CPDPRG2 waltz16  
 NUC2 1H  
 P3 10.00 usec  
 P4 20.00 usec  
 PCPD2 80.00 usec  
 PL2 -1.50 dB  
 PL12 17.50 dB  
 SFO2 400.1316000 MHz

F2 - Processing parameters  
 SI 32768  
 SF 100.6127690 MHz  
 WDW EM  
 SSB 0  
 LB 1.00 Hz  
 GB 0  
 PC 1.40

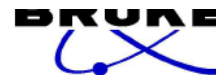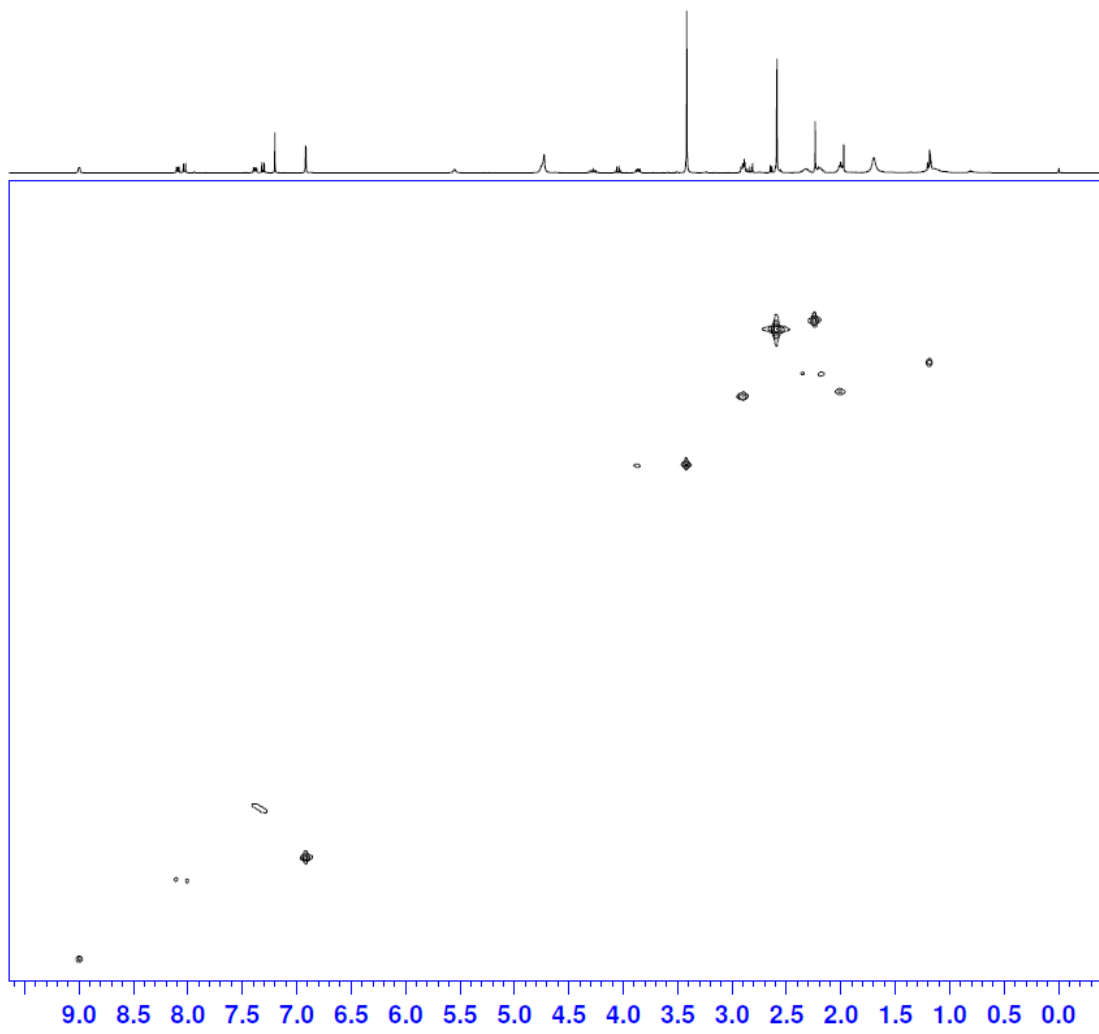

Current Data Parameters  
NAME act7-78-1  
EXPNO 14  
PROCNO 1

F2 - Acquisition Parameters  
Date\_ 20120329  
Time 0.09  
INSTRUM DRX400  
PROBHD 5 mm QNP 1H/13  
PULPROG hmqcpggf  
TD 1024  
SOLVENT CDCl3  
NS 4  
DS 16  
SWH 4032.258 Hz  
FIDRES 3.937752 Hz  
AQ 0.1270260 sec  
RG 26008  
DW 124.000 usec  
DE 6.00 usec  
TE 294.2 K  
CNS12 145.0000000 sec  
d0 0.0000300 sec  
d1 1.50000000 sec  
d2 0.00344828 sec  
d12 0.00002000 sec  
d13 0.00000400 sec  
d14 0.00020000 sec  
DELTA1 0.00222428 sec  
IN0 0.00003000 sec

==== CHANNEL f1 =====  
NUC1 1H  
P1 10.00 usec  
P2 20.00 usec  
PL1 -1.50 dB  
SFO1 400.1318765 MHz

==== CHANNEL f2 =====  
CPDPRG2 garp  
NUC2 13C  
P3 8.00 usec  
PCPD2 74.00 usec  
PL2 -3.00 dB  
PL12 18.00 dB  
SFO2 100.6203140 MHz

==== GRADIENT CHANNEL =====  
GPNAM1 SINE.100  
GPNAM2 SINE.100  
GPNAM3 SINE.100  
GPZ1 50.00 %  
GPZ2 50.00 %  
GPZ3 40.10 %  
P16 1000.00 usec

F1 - Acquisition parameters  
ND0 2  
TD 128  
SFO1 100.6203 MHz  
FIDRES 130.208328 Hz  
SW 165.639 ppm  
FrMODE QF

F2 - Processing parameters  
SI 1024  
SF 400.1300339 MHz  
WDW QSINE  
SSB 2  
LB 0.00 Hz  
GB 0  
PC 1.40

F1 - Processing parameters  
SI 1024  
MC2 QF  
SF 100.6127690 MHz  
WDW QSINE  
SSB 2  
LB 0.00 Hz  
GB 0

Methyl *N*<sup>2</sup>-(phenylsulfonyl)-*N*<sup>4</sup>-((1*r*\*,3*R*\*)-3-(2-(5,6,7,8-tetrahydro-1,8-naphthyridin-2-

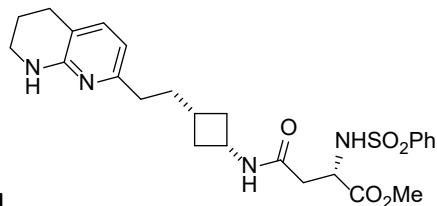

yl)ethyl)cyclobutyl)-*L*-asparaginate [Compound 32]

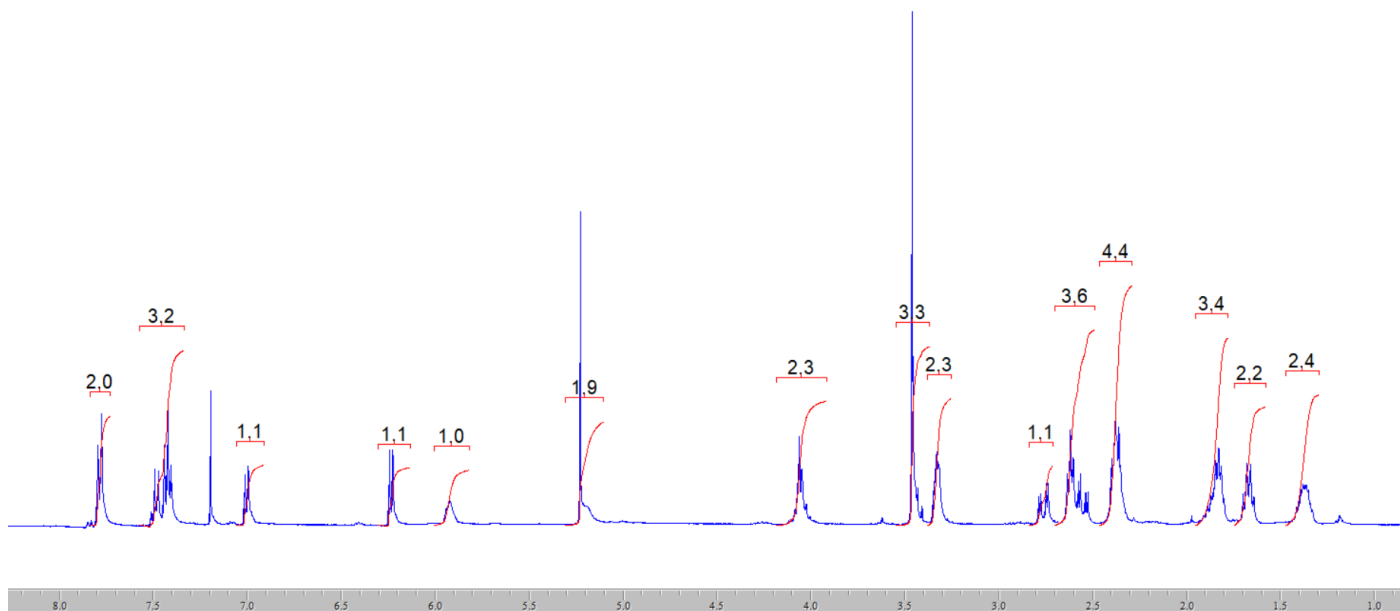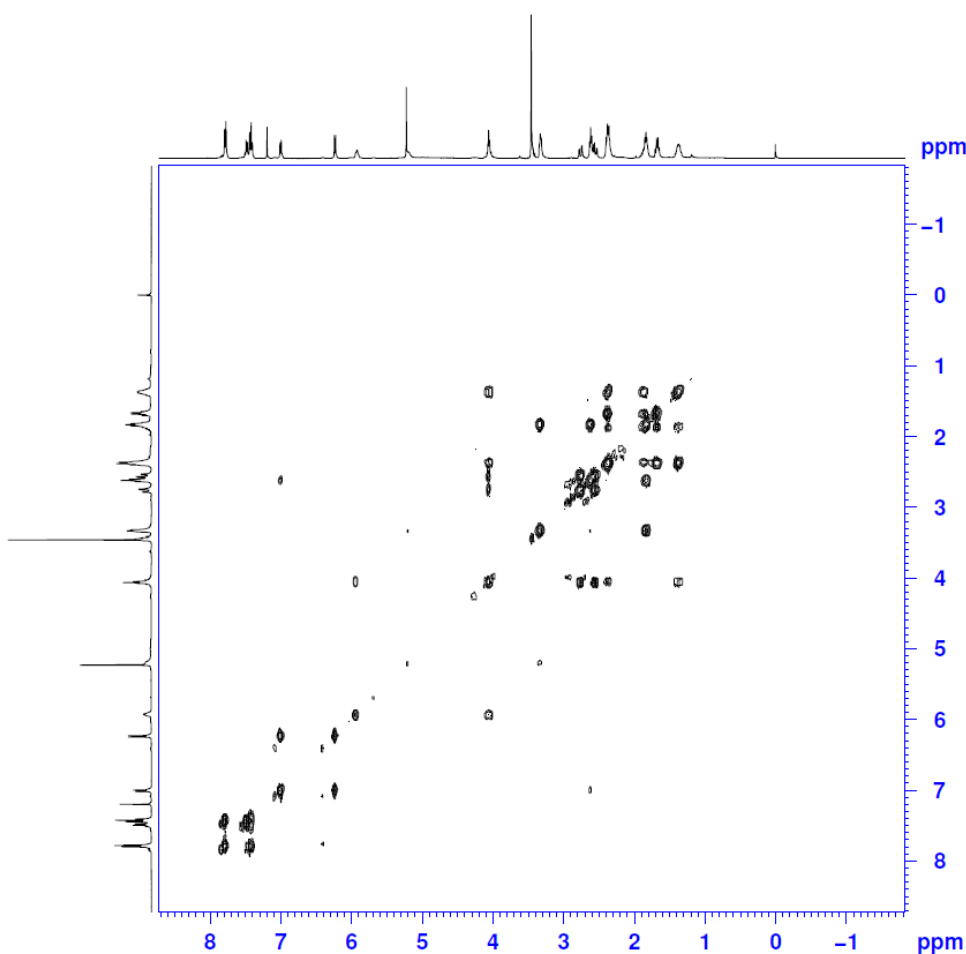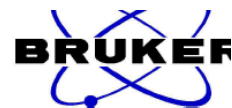

Current Data Parameters  
 NAME aet7-93-2  
 EXPNO 13  
 PROCNO 1

F2 - Acquisition Parameters  
 Date\_ 20120608  
 Time 22.11  
 INSTRUM DFX400  
 PROBHD 5 mm QNP 1H/13  
 PULPROG cosygpmzgqf  
 ID 2048  
 SOLVENT CDCl3  
 NS 4  
 DS 8  
 SWH 4222.973 Hz  
 FIDRES 2.061999 Hz  
 AQ 0.2425332 sec  
 RG 5160.6  
 DW 118.400 usec  
 DE 6.00 usec  
 TE 298.2 K  
 D0 0.0000300 sec  
 D1 1.95002902 sec  
 d13 0.00000400 sec  
 D16 0.00020000 sec  
 INO 0.00023680 sec

----- CHANNEL f1 -----  
 NUC1 13  
 P1 10.00 usec  
 PL1 -1.50 dB  
 SFO1 400.1314144 MHz

----- GRADIENT CHANNEL -----  
 GPNAM1 SINE.100  
 GPNAM2 SINE.100  
 GPNAM3 SINE.100  
 GPZ1 16.00 %  
 GPZ2 12.00 %  
 GPZ3 40.00 %  
 P16 1000.00 usec

F1 - Acquisition parameters  
 NDO 1  
 ID 128  
 SFO1 400.1314 MHz  
 FIDRES 32.991978 Hz  
 SW 10.554 ppm  
 FqMODE QF

F2 - Processing parameters  
 SI 1024  
 SF 400.1300344 MHz  
 WDW SINE  
 SSB 0  
 LB 0.00 Hz  
 GB 0  
 PC 1.40

F1 - Processing parameters  
 SI 1024  
 MC2 QF  
 SF 400.1300344 MHz  
 WDW SINE  
 SSB 0  
 LB 0.00 Hz  
 GB 0

aet7-93-2

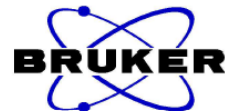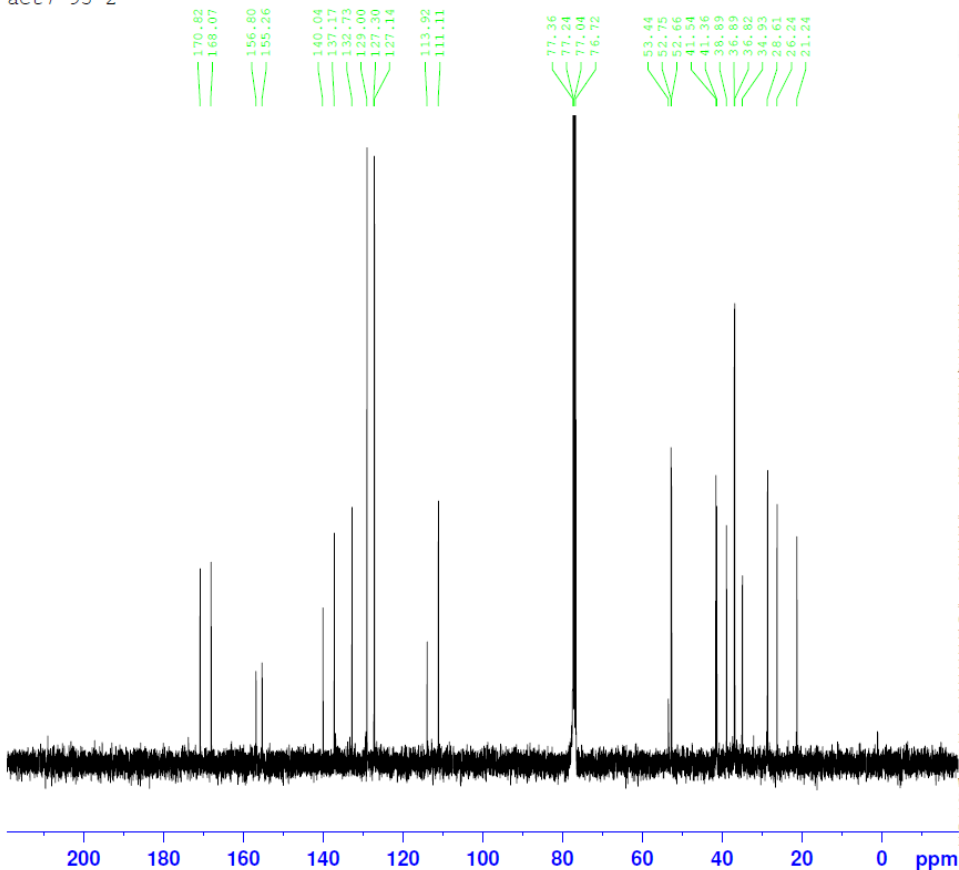

Current Data Parameters  
 NAME aet7-93-2  
 EXPNO 11  
 PROCNO 1

F2 - Acquisition Parameters  
 Date\_ 20120608  
 Time 21.40  
 INSTRUM DPX400  
 PROBHD 5 mm QNP 1H/13  
 PULPROG zgpg30  
 TD 65536  
 SOLVENT CDCl3  
 NS 1024  
 DS 4  
 SWH 23980.814 Hz  
 FIDRES 0.365918 Hz  
 AQ 1.3664756 sec  
 RG 812.7  
 DW 20.850 usec  
 DE 6.00 usec  
 TE 298.2 K  
 D1 2.0000000 sec  
 d11 0.0300000 sec  
 DELTA 1.89999998 sec  
 TD0 1

===== CHANNEL f1 =====  
 NUC1 13C  
 P1 8.50 usec  
 PL1 -2.60 dB  
 SFO1 100.6228298 MHz

===== CHANNEL f2 =====  
 CPDPRG2 waltz16  
 NUC2 1H  
 PCPD2 80.00 usec  
 PL2 -1.50 dB  
 PL12 17.50 dB  
 PL13 17.50 dB  
 SFO2 400.1316005 MHz

F2 - Processing parameters  
 SI 32768  
 SF 100.6127690 MHz  
 WDW EM  
 SSB 0  
 LB 1.00 Hz  
 GB 0  
 PC 1.40

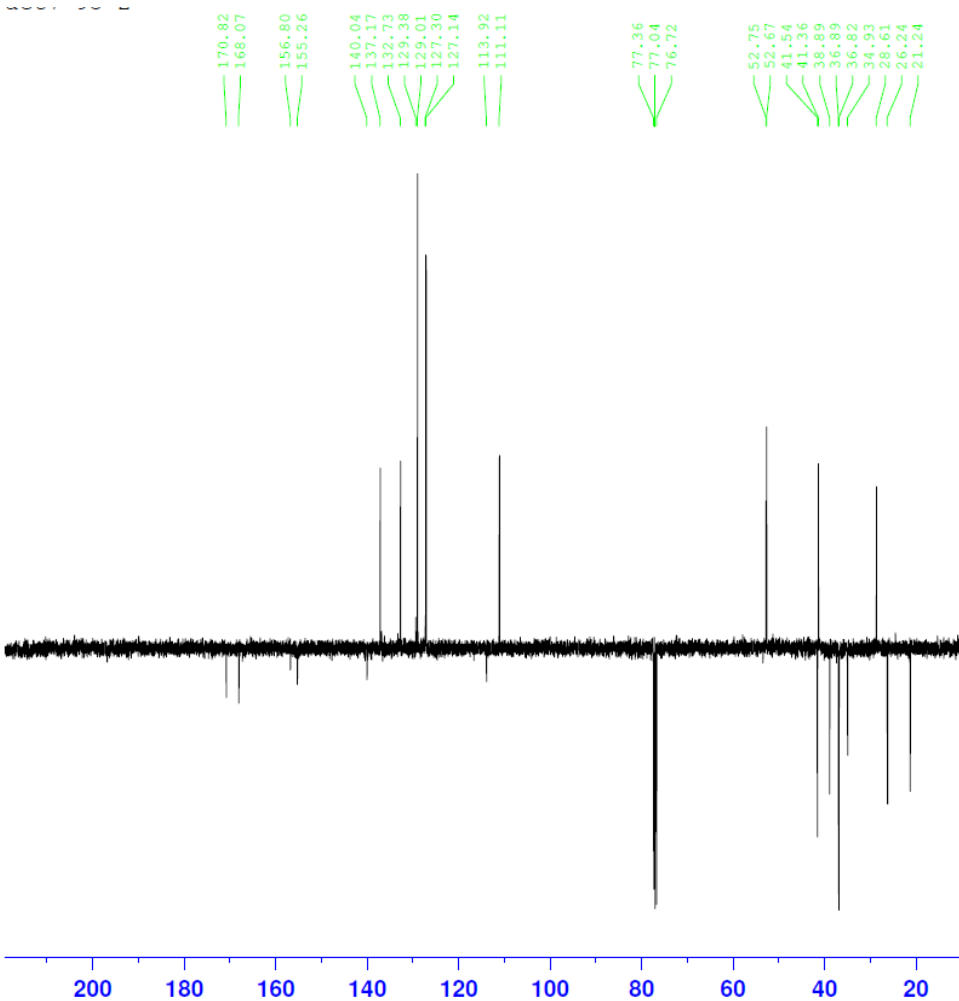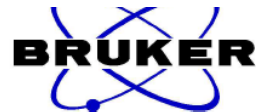

Current Data Parameters  
 NAME aet7-93-2  
 EXPNO 12  
 PROCNO 1

F2 - Acquisition Parameters  
 Date\_ 20120608  
 Time 22.10  
 INSTRUM DPX400  
 PROBHD 5 mm QNP 1H/13  
 PULPROG deptq\_135  
 TD 65536  
 SOLVENT CDCl3  
 NS 512  
 DS 4  
 SWH 23980.814 Hz  
 FIDRES 0.365918 Hz  
 AQ 1.3664756 sec  
 RG 18390.4  
 DW 20.850 usec  
 DE 6.00 usec  
 TE 298.2 K  
 CNST2 145.0000000  
 D1 2.0000000 sec  
 d2 0.00344828 sec  
 D11 0.0300000 sec  
 DELTA 0.00001082 sec

===== CHANNEL f1 =====  
 NUC1 13C  
 P1 8.50 usec  
 P2 17.00 usec  
 PL1 -2.60 dB  
 SFO1 100.6228300 MHz

===== CHANNEL f2 =====  
 CPDPRG2 waltz16  
 NUC2 1H  
 P3 10.00 usec  
 P4 20.00 usec  
 PCPD2 80.00 usec  
 PL2 -1.50 dB  
 PL12 17.50 dB  
 SFO2 400.1316000 MHz

F2 - Processing parameters  
 SI 32768  
 SF 100.6127690 MHz  
 WDW EM  
 SSB 0  
 LB 1.00 Hz  
 GB 0  
 PC 1.40

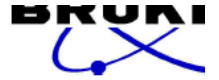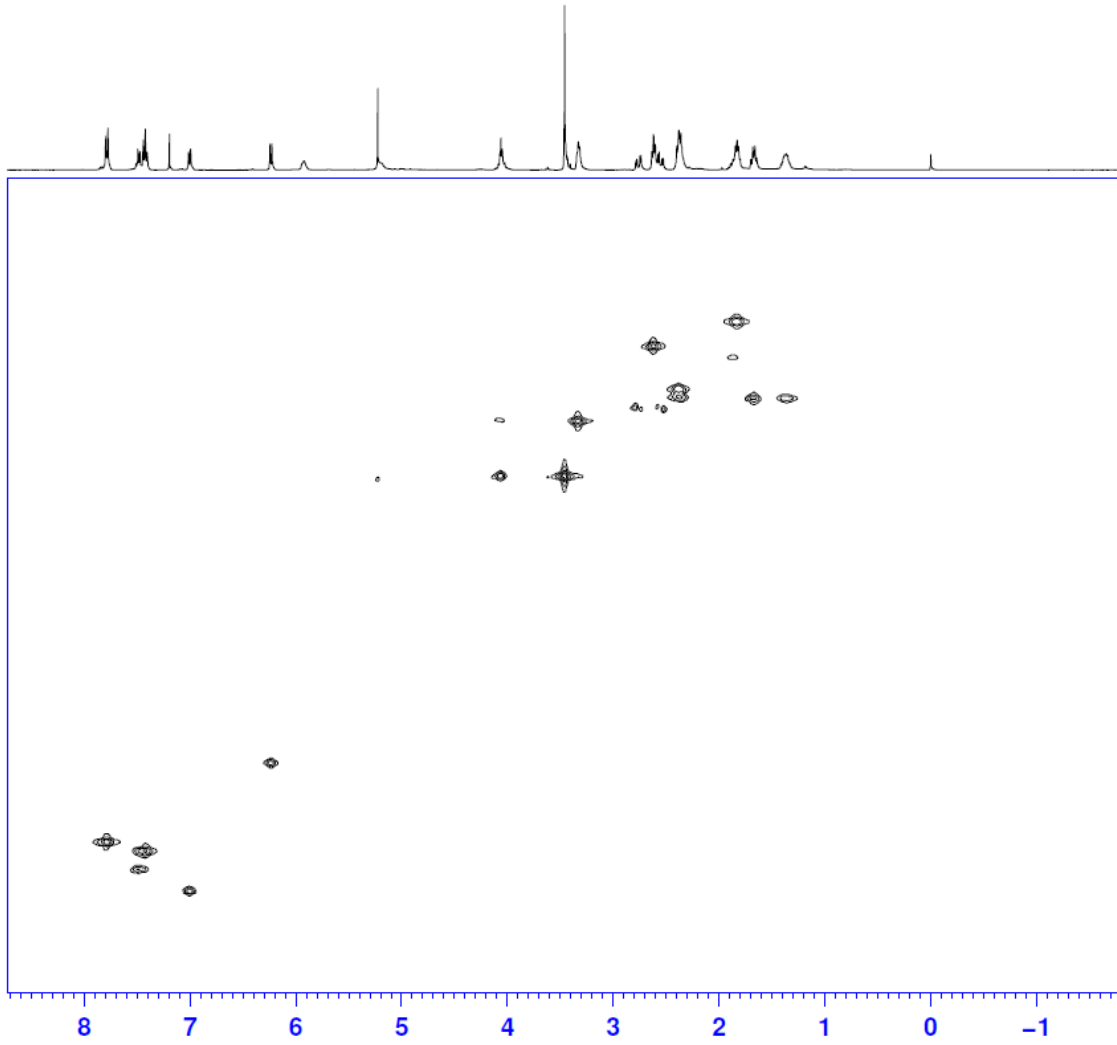

Current Data Parameters  
NAME sat7-93-2  
EXPNO 14  
PROCNO 1

F2 - Acquisition Parameters  
Date\_ 20120608  
Time 22.31  
INSTRUM DPK400  
PROBHD 5 mm QNP 1H/13  
PULPROG hmqcqpqf  
TD 1024  
SOLVENT CDCl3  
NS 4  
DS 16  
SWH 4222.973 Hz  
FIDRES 4.123997 Hz  
AQ 0.1212916 sec  
RG 8192  
DW 118.400 usec  
DE 6.00 usec  
TE 298.2 K  
CNST2 145.0000000  
d0 0.0000300 sec  
d1 1.50614405 sec  
d2 0.00344828 sec  
d12 0.00002000 sec  
d13 0.00000400 sec  
d16 0.00020000 sec  
DELTA1 0.00222428 sec  
IN0 0.00003000 sec

==== CHANNEL F1 ====  
NUC1 1H  
P1 10.00 usec  
P2 20.00 usec  
PL1 -1.50 dB  
SFO1 400.1314144 MHz

==== CHANNEL F2 ====  
CPDPRG2 gqcp  
NUC2 13C  
P3 8.00 usec  
PCPD2 74.00 usec  
PL2 -3.00 dB  
PL12 18.00 dB  
SFO2 100.6203140 MHz

==== GRADIENT CHANNEL ====  
GPNAM1 SINE.100  
GPNAM2 SINE.100  
GPNAM3 SINE.100  
GPZ1 50.00 %  
GPZ2 30.00 %  
GPZ3 40.10 %  
F16 1000.00 usec

F1 - Acquisition parameters  
NDO 2  
TD 128  
SFO1 100.6203 MHz  
FIDRES 130.208328 Hz  
SW 165.639 ppm  
FMODE QF

F2 - Processing parameters  
SI 1024  
SF 400.1300344 MHz  
WDW QSSINE  
SBB 2  
LB 0.00 Hz  
GB 0  
PC 1.40

F1 - Processing parameters  
SI 1024  
MC2 QF  
SF 100.6127690 MHz  
WDW QSSINE  
SBB 2  
LB 0.00 Hz  
GB 0

Methyl *N*<sup>2</sup>-(mesitylsulfonyl)-*N*<sup>4</sup>-((1*r*\*,3*R*\*)-3-(2-(5,6,7,8-tetrahydro-1,8-naphthyridin-2-

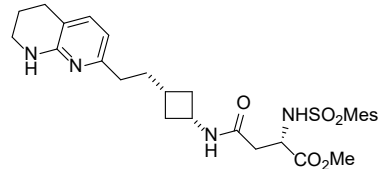

yl)ethyl)cyclobutyl)-*L*-asparaginate [Compound 33]

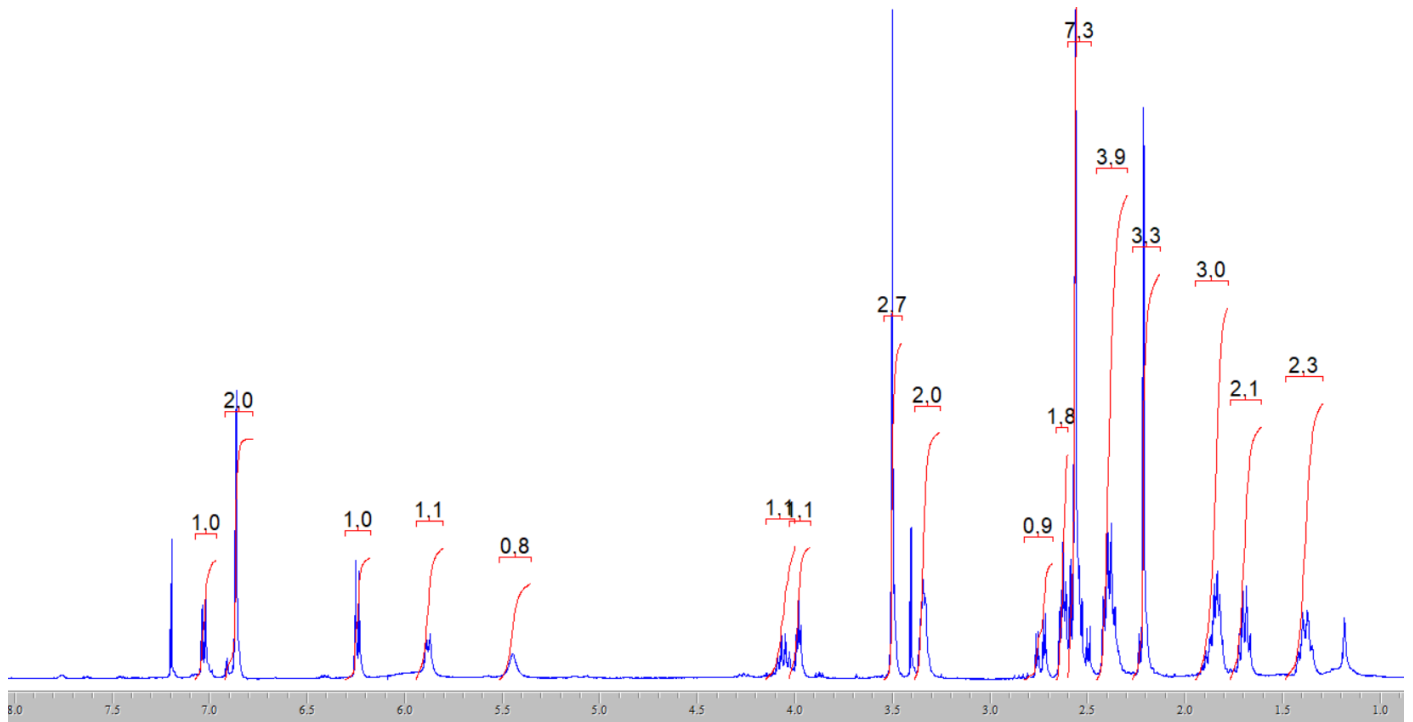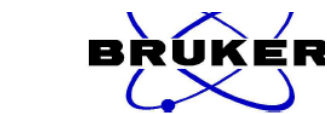

Current Data Parameters  
 NAME set7-96-2a  
 EXPNO 14  
 PROCNO 1

F2 - Acquisition Parameters  
 Date\_ 20120618  
 Time 19.53  
 INSTRUM dpx400  
 PROBHD 5 mm QNP 1H/13  
 PULPROG cosygmrgf  
 ID 2048  
 SOLVENT CDCl3  
 NS 4  
 DS 8  
 SWH 3654.971 Hz  
 FIDRES 1.784654 Hz  
 AQ 0.2802164 sec  
 RG 2896.3  
 DW 136.900 usec  
 DE 6.00 usec  
 TE 298.2 K  
 DO 0.00000300 sec  
 D1 1.91111696 sec  
 d13 0.00000400 sec  
 D16 0.00020000 sec  
 IN0 0.00027360 sec

----- CHANNEL f1 -----  
 NUC1 1H  
 P1 10.00 usec  
 PL1 -1.50 dB  
 SFO1 400.1313427 MHz

----- GRADIENT CHANNEL -----  
 GPNAM1 SINE.100  
 GPNAM2 SINE.100  
 GPNAM3 SINE.100  
 GPZ1 16.00 %  
 GPZ2 12.00 %  
 GPZ3 40.00 %  
 P16 1000.00 usec

F1 - Acquisition parameters  
 ND0 1  
 ID 128  
 SFO1 400.1313 MHz  
 FIDRES 28.554459 Hz  
 SW 9.134 ppm  
 FMODE QF

F2 - Processing parameters  
 SI 1024  
 SF 400.1300342 MHz  
 WDW SINE  
 SSB 0  
 LB 0.00 Hz  
 GB 0  
 FC 1.40

F1 - Processing parameters  
 SI 1024  
 MC2 QF  
 SF 400.1300342 MHz  
 WDW SINE  
 SSB 0  
 LB 0.00 Hz  
 GB 0

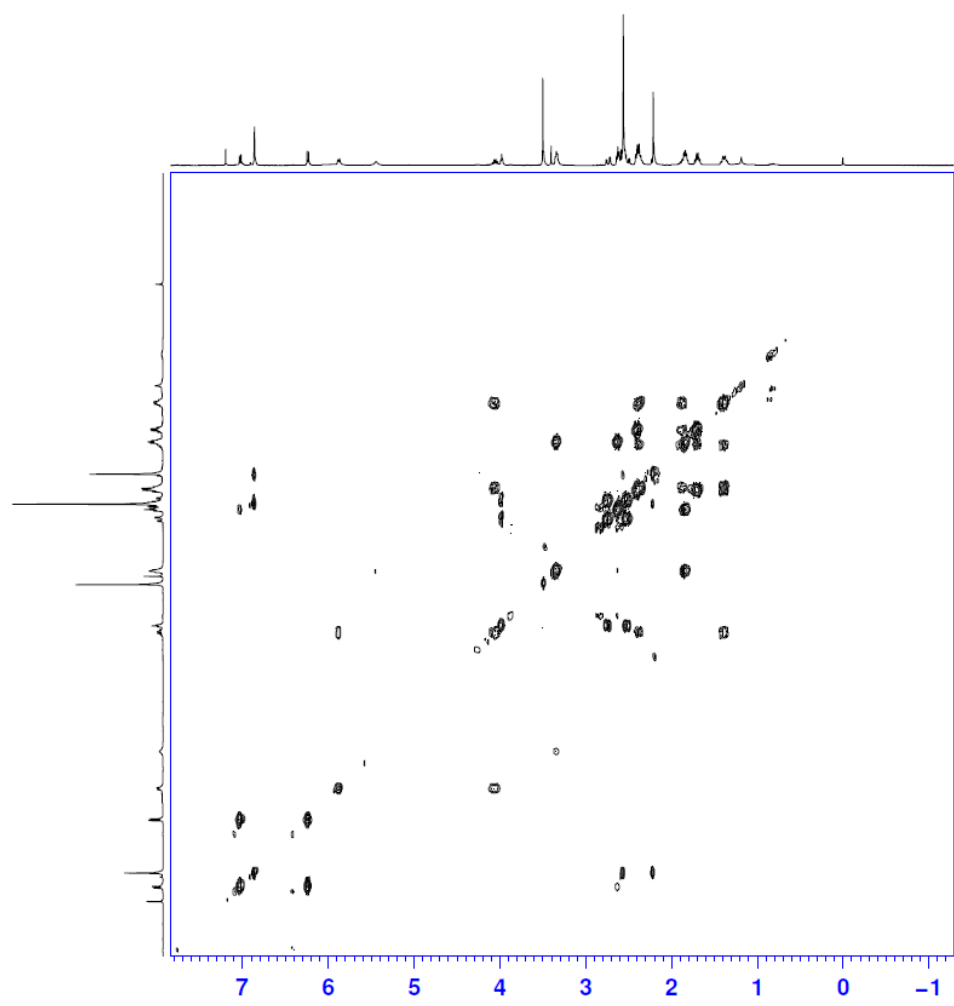

aet7-96-2

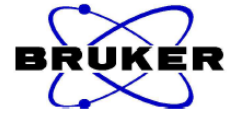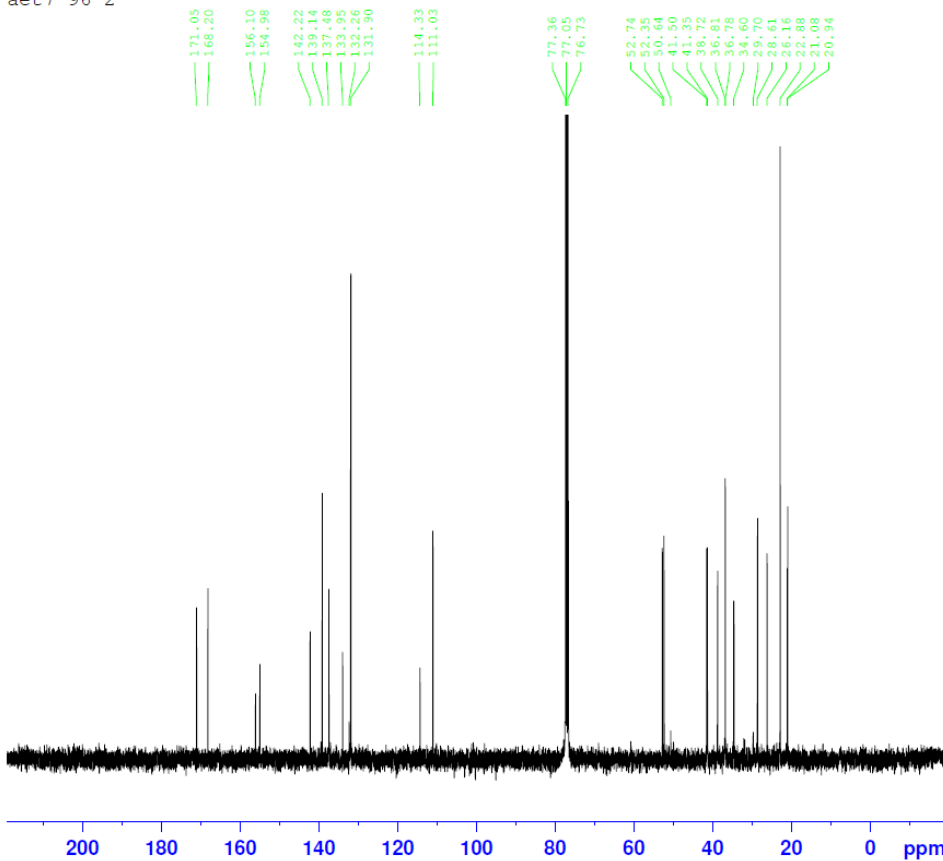

Current Data Parameters  
 NAME aet7-96-2a  
 EXPNO 20  
 PROCNO 1

F2 - Acquisition Parameters  
 Date\_ 20120618  
 Time 19.06  
 INSTRUM DPX400  
 PROBHD 5 mm QNP 1H/13  
 PULPROG zgpg30  
 TD 65536  
 SOLVENT CDC13  
 NS 1024  
 DS 4  
 SWH 23980.814 Hz  
 FIDRES 0.365918 Hz  
 AQ 1.3664756 sec  
 RG 912.3  
 DW 20.850 usec  
 DE 6.00 usec  
 TE 298.2 K  
 D1 2.00000000 sec  
 d11 0.03000000 sec  
 DELTA 1.89999998 sec  
 TD0 1

===== CHANNEL f1 =====  
 NUC1 13C  
 P1 8.50 usec  
 PL1 -2.60 dB  
 SFO1 100.6228298 MHz

===== CHANNEL f2 =====  
 CPDPRG2 waltz16  
 NUC2 1H  
 PCPD2 80.00 usec  
 PL2 -1.50 dB  
 PL12 17.50 dB  
 PL13 17.50 dB  
 SFO2 400.1316005 MHz

F2 - Processing parameters  
 SI 32768  
 SF 100.6127690 MHz  
 WDW EM  
 SSB 0  
 LB 1.00 Hz  
 GB 0  
 PC 1.40

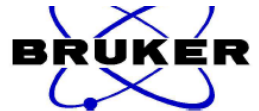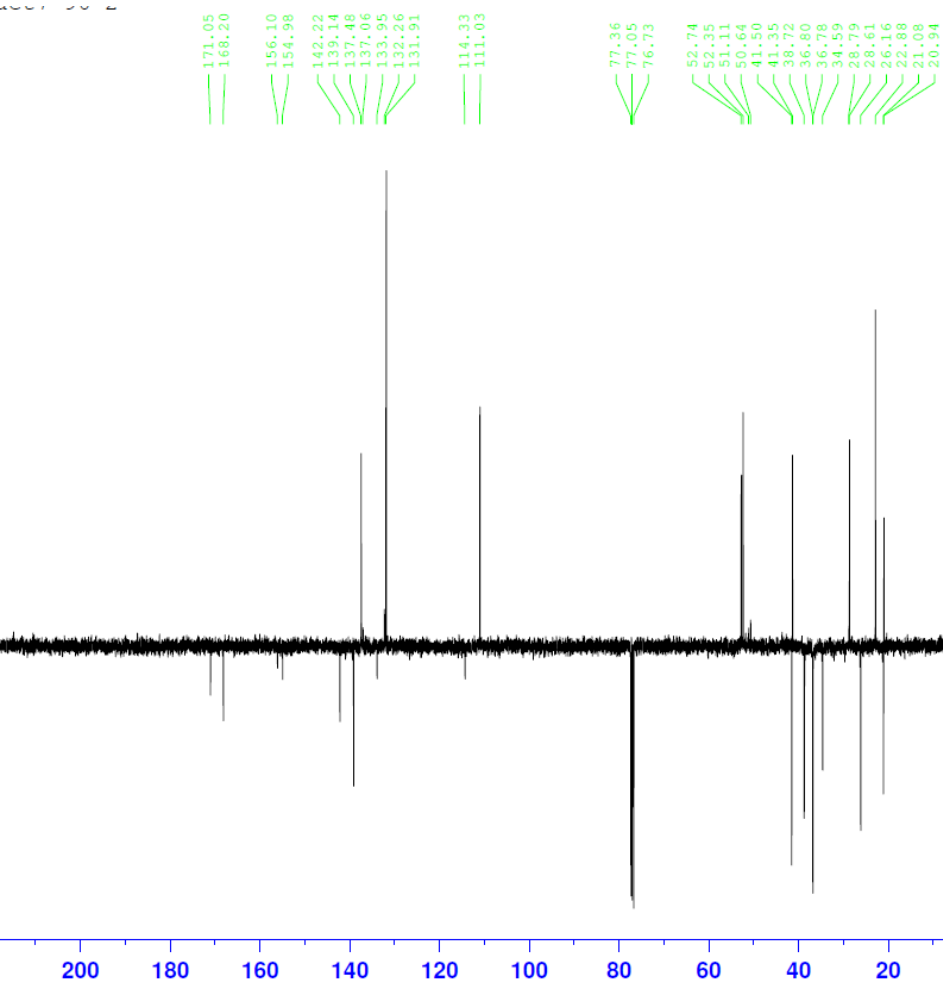

Current Data Parameters  
 NAME aet7-96-2a  
 EXPNO 11  
 PROCNO 1

F2 - Acquisition Parameters  
 Date\_ 20120618  
 Time 19.36  
 INSTRUM DPX400  
 PROBHD 5 mm QNP 1H/13  
 PULPROG deptq\_135  
 TD 65536  
 SOLVENT CDC13  
 NS 512  
 DS 4  
 SWH 23980.814 Hz  
 FIDRES 0.365918 Hz  
 AQ 1.3664756 sec  
 RG 11585.2  
 DW 20.850 usec  
 DE 6.00 usec  
 TE 298.2 K  
 CNST2 145.0000000  
 D1 2.00000000 sec  
 d2 0.00344828 sec  
 D11 0.03000000 sec  
 DELTA 0.00001082 sec

===== CHANNEL f1 =====  
 NUC1 13C  
 P1 8.50 usec  
 P2 17.00 usec  
 PL1 -2.60 dB  
 SFO1 100.6228300 MHz

===== CHANNEL f2 =====  
 CPDPRG2 waltz16  
 NUC2 1H  
 P3 10.00 usec  
 P4 20.00 usec  
 PCPD2 80.00 usec  
 PL2 -1.50 dB  
 PL12 17.50 dB  
 SFO2 400.1316000 MHz

F2 - Processing parameters  
 SI 32768  
 SF 100.6127690 MHz  
 WDW EM  
 SSB 0  
 LB 1.00 Hz  
 GB 0  
 PC 1.40



Current Data Parameters  
 NAME ast7-96-2a  
 EXPNO 13  
 PROCNO 1

F2 - Acquisition Parameters  
 Date\_ 20120618  
 Time 19:38  
 INSTRUM DFX400  
 PROBHD 5 mm QNP 1H/13  
 PULPROG hmqcpgpgf  
 TD 1024  
 SOLVENT CDCl3  
 NS 4  
 DS 16  
 SWH 3654.971 Hz  
 FIDRES 3.569307 Hz  
 AQ 0.1401332 sec  
 RG 26008  
 DW 136.800 usec  
 DE 6.00 usec  
 TE 298.2 K  
 C12 145.0000000 sec  
 d0 0.000003000 sec  
 d1 1.48668802 sec  
 d2 0.0034828 sec  
 d12 0.00002000 sec  
 d13 0.00000400 sec  
 D16 0.00020000 sec  
 DELTA1 0.00222428 sec  
 INO 0.00003000 sec

==== CHANNEL F1 =====  
 NUC1 1H  
 P1 10.00 usec  
 p2 20.00 usec  
 PL1 -1.50 dB  
 SFO1 400.1313427 MHz

==== CHANNEL F2 =====  
 CPDPRG2 gcp  
 NUC2 13C  
 P3 8.00 usec  
 PCPD2 74.00 usec  
 PL2 -3.00 dB  
 PL12 18.00 dB  
 SFO2 100.6203140 MHz

==== GRADIENT CHANNEL =====  
 GPNAM1 SINE.100  
 GPNAM2 SINE.100  
 GPNAM3 SINE.100  
 GPZ1 50.00 %  
 GPZ2 30.00 %  
 GPZ3 40.10 %  
 P16 1000.00 usec

F1 - Acquisition parameters  
 ND0 2  
 TD 128  
 SFO1 100.6203 MHz  
 FIDRES 130.208328 Hz  
 SW 165.639 ppm  
 F1MODE QF

F2 - Processing parameters  
 SI 1024  
 SF 400.1300342 MHz  
 WDW QSINE  
 SSB 2  
 LB 0.00 Hz  
 GB 0  
 FC 1.40

F1 - Processing parameters  
 SI 1024  
 MC2 QF  
 SF 100.6127690 MHz  
 WDW QSINE  
 SSB 2  
 LB 0.00 Hz  
 GB 0

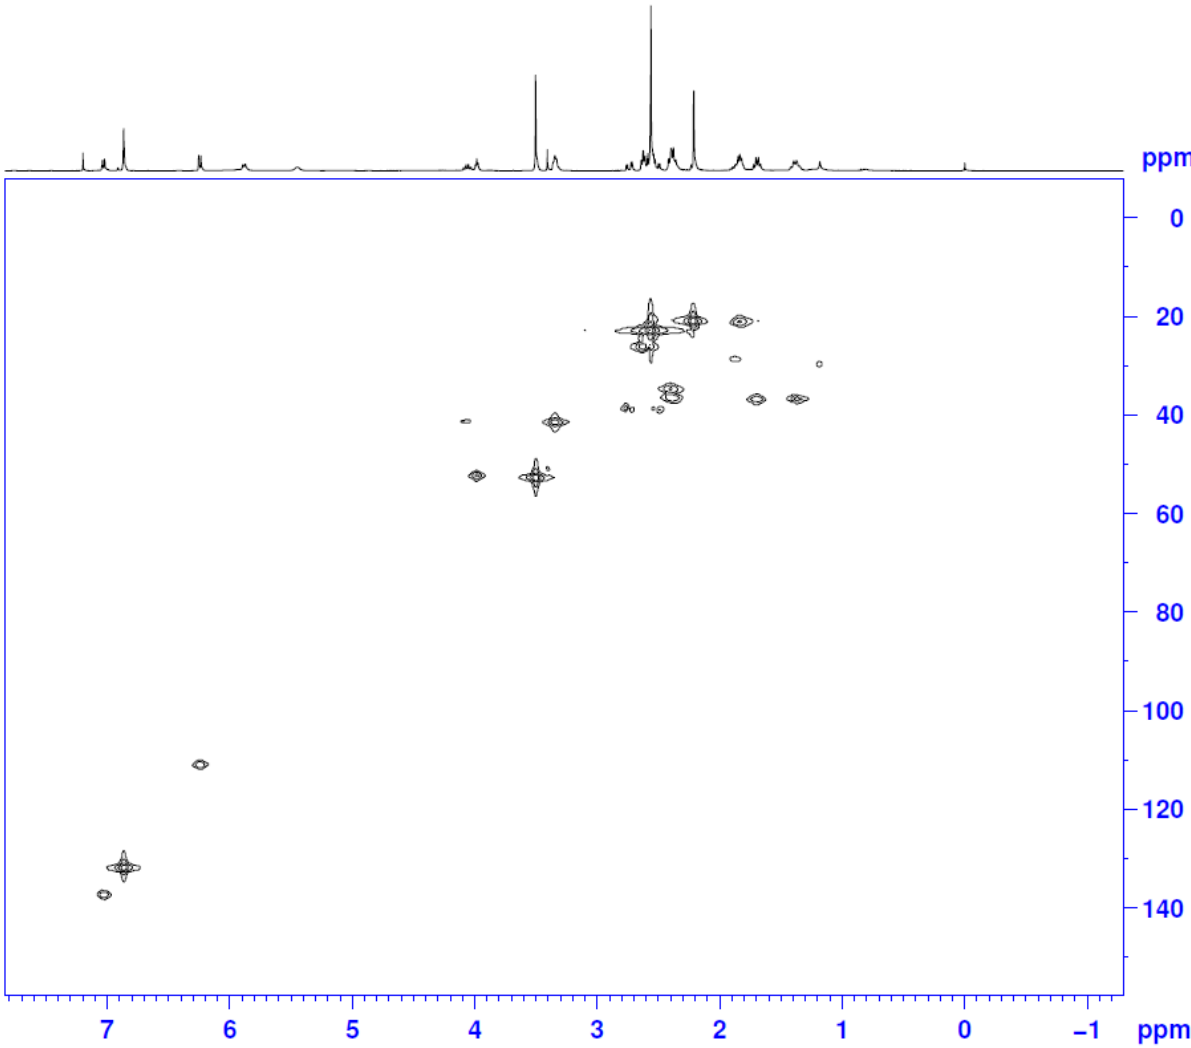

*N*-((*S*)-2,5-dioxo-1-((1*r*\*,3*R*\*)-3-(2-(5,6,7,8-tetrahydro-1,8-naphthyridin-2-

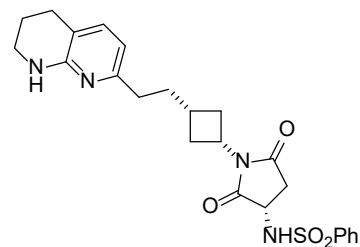

yl)ethyl)cyclobutyl)pyrrolidin-3-yl)benzenesulfonamide [Compound 34]

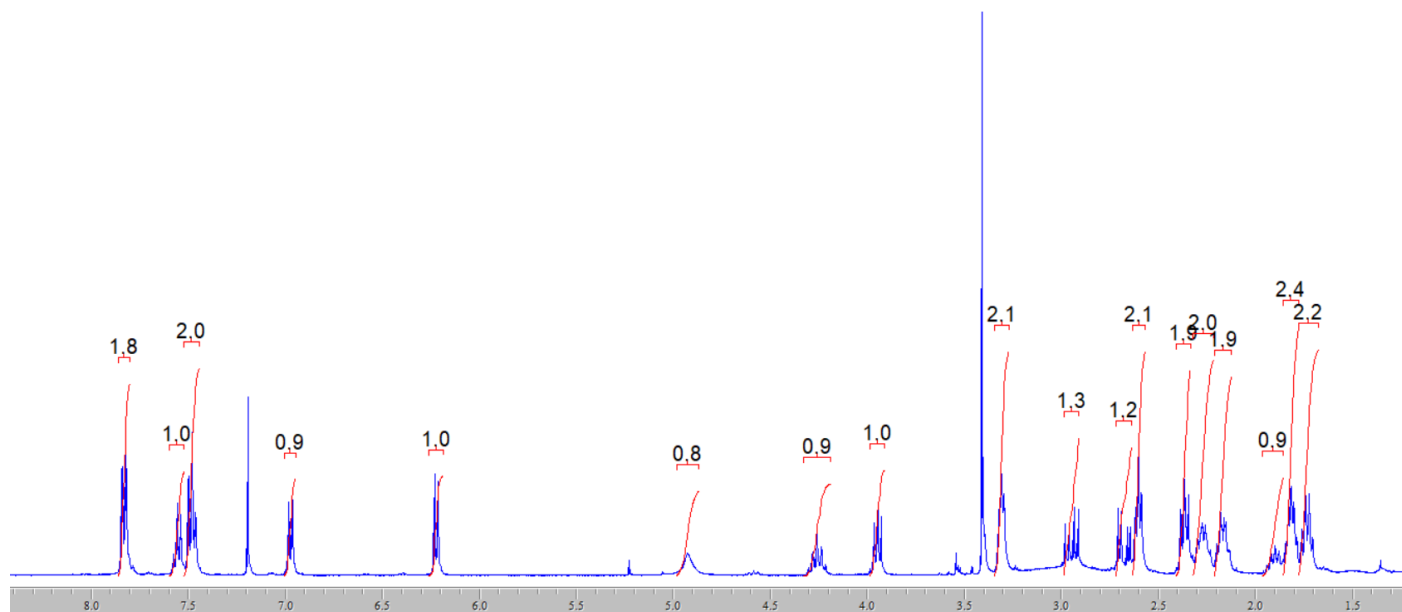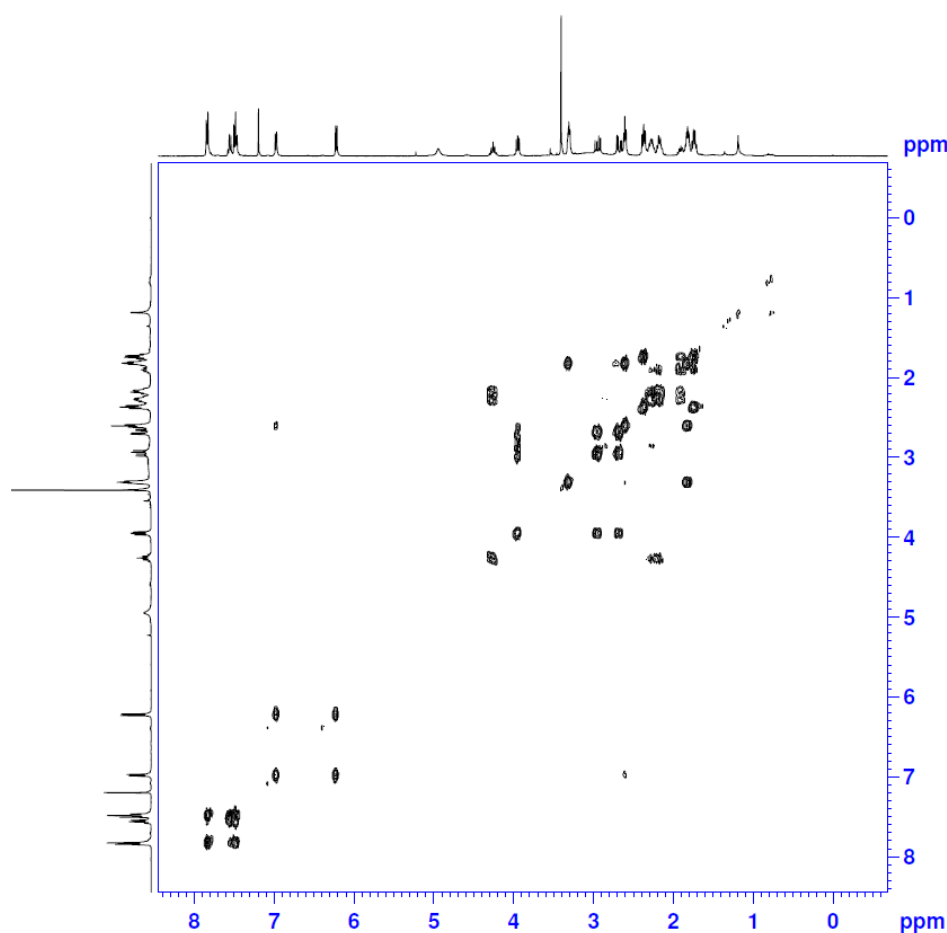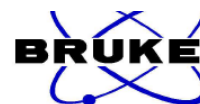

Current Data Parameters  
NAME aet9-1-2  
EXPNO 14  
PROCNO 1

F2 - Acquisition Parameters  
Date\_ 20120623  
Time 2.35  
INSTRUM spect400  
PROBHD 5 mm QNP 1H/13  
PULPROG cosygmfzf  
TD 2048  
SOLVENT cdcl3  
NS 4  
DS 8  
SWH 3654.971 Hz  
FIDRES 1.784654 Hz  
AQ 0.2802164 sec  
RG 4096  
DW 136.800 usec  
DE 6.00 usec  
TE 298.2 K  
D0 0.0000300 sec  
D1 1.9111696 sec  
d13 0.0000400 sec  
D16 0.0002000 sec  
IN0 0.00027360 sec

CHANNEL f1  
NUC1 13C  
P1 10.00 usec  
PL1 -1.50 dB  
SFO1 400.1315885 MHz

GRADIENT CHANNEL  
GPNAM1 SINE.100  
GPNAM2 SINE.100  
GPNAM3 SINE.100  
GPZ1 15.00 %  
GPZ2 12.00 %  
GPZ3 40.00 %  
P16 1000.00 usec

F1 - Acquisition parameters  
ND0 1  
TD 128  
SFO1 400.1316 MHz  
FIDRES 28.554459 Hz  
SW 9.134 ppm  
FMODE QF

F2 - Processing parameters  
SI 1024  
SF 400.1300355 MHz  
WVW SINE  
SSB 0  
LB 0.00 Hz  
GB 0  
PC 1.40

F1 - Processing parameters  
SI 1024  
MC2 QF  
SF 400.1300355 MHz  
WVW SINE  
SSB 0  
LB 0.00 Hz  
GB 0

t9-1-2

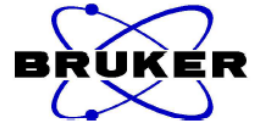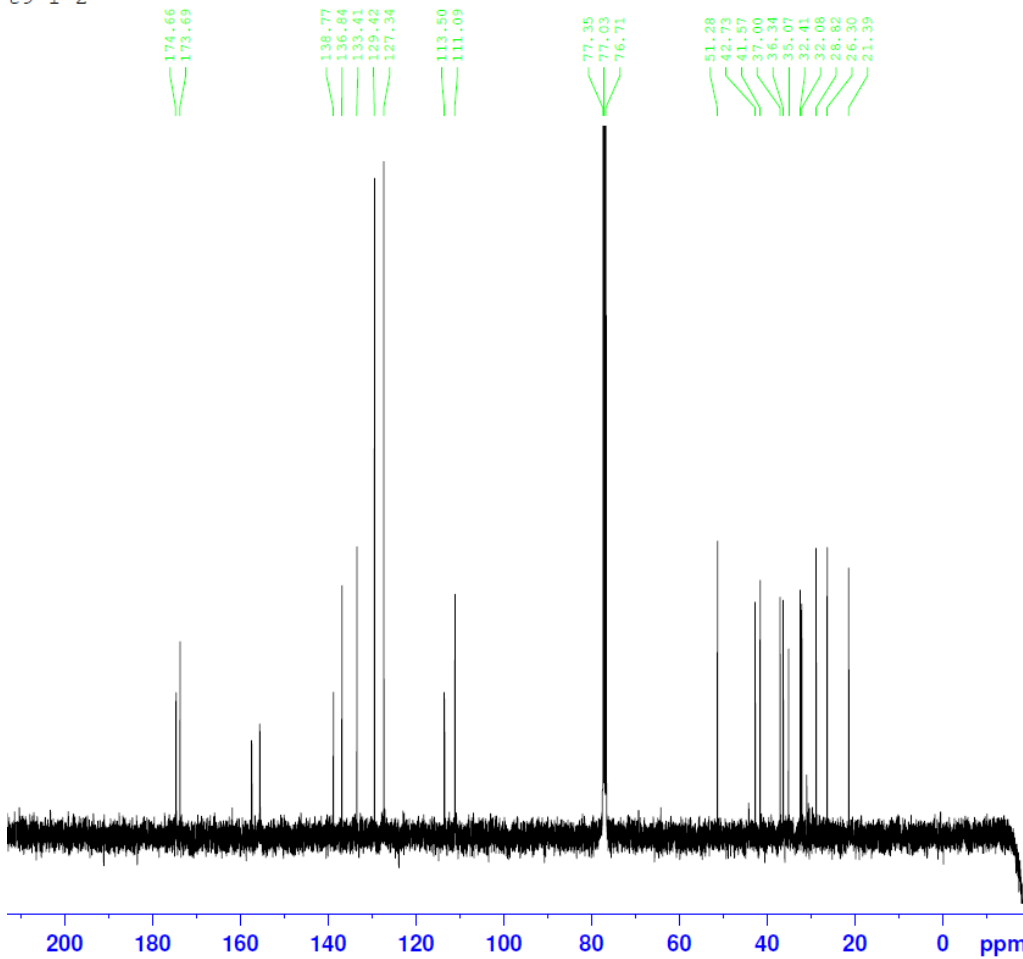

Current Data Parameters  
 NAME aet9-1-2  
 EXPNO 30  
 PROCNO 1

F2 - Acquisition Parameters  
 Date\_ 20120705  
 Time 20.26  
 INSTRUM DPX400  
 PROBHD 5 mm QNP 1H/13  
 PULPROG zgpg30  
 TD 65536  
 SOLVENT CDC13  
 NS 1024  
 DS 4  
 SWH 23980.814 Hz  
 FIDRES 0.365918 Hz  
 AQ 1.3664756 sec  
 RG 912.3  
 DW 20.850 usec  
 DE 6.00 usec  
 TE 298.2 K  
 D1 2.00000000 sec  
 d11 0.03000000 sec  
 DELTA 1.89999998 sec  
 TD0 1

===== CHANNEL f1 =====  
 NUC1 13C  
 P1 8.50 usec  
 PL1 -2.60 dB  
 SFO1 100.6228298 MHz

===== CHANNEL f2 =====  
 CPDPRG2 waltz16  
 NUC2 1H  
 PCPD2 80.00 usec  
 PL2 -1.50 dB  
 PL12 17.50 dB  
 PL13 17.50 dB  
 SFO2 400.1316005 MHz

F2 - Processing parameters  
 SI 32768  
 SF 100.6127690 MHz  
 WDW EM  
 SSB 0  
 LB 1.00 Hz  
 GB 0  
 PC 1.40

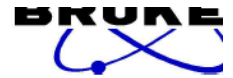

Current Data Parameters  
 NAME aet9-1-2  
 EXPNO 13  
 PROCNO 1

F2 - Acquisition Parameters  
 Date\_ 20120705  
 Time 20.59  
 INSTRUM DPX400  
 PROBHD 5 mm QNP 1H/13  
 PULPROG hmqcgpuf  
 TD 1024  
 SOLVENT CDC13  
 NS 16  
 DS 4  
 SWH 4166.667 Hz  
 FIDRES 4.069010 Hz  
 AQ 0.1229300 sec  
 RG 7298.2  
 DW 120.000 usec  
 DE 6.00 usec  
 TE 298.2 K  
 CNST2 145.0000000  
 d0 0.0000300 sec  
 D1 1.50409603 sec  
 d2 0.00344828 sec  
 d12 0.00002000 sec  
 d13 0.00000400 sec  
 D16 0.00020000 sec  
 DELTA1 0.00222428 sec  
 INO 0.00003000 sec

===== CHANNEL f1 =====  
 NUC1 1H  
 P1 10.00 usec  
 P2 20.00 usec  
 PL1 -1.50 dB  
 SFO1 400.1313712 MHz

===== CHANNEL f2 =====  
 CPDPRG2 gprp  
 NUC2 13C  
 P3 8.00 usec  
 PCPD2 74.00 usec  
 PL2 -3.00 dB  
 PL12 18.00 dB  
 SFO2 100.6203140 MHz

===== GRADIENT CHANNEL =====  
 GPNAM1 SINE.100  
 GPNAM2 SINE.100  
 GPNAM3 SINE.100  
 GPZ1 50.00 %  
 GPZ2 30.00 %  
 GPZ3 40.10 %  
 P16 1000.00 usec

F1 - Acquisition parameters  
 ND0 2  
 TD 128  
 SFO1 100.6203 MHz  
 FIDRES 130.208328 Hz  
 SW 165.639 ppm  
 FMODE QF

F2 - Processing parameters  
 SI 1024  
 SF 400.1300358 MHz  
 WDW QSINE  
 SSB 2  
 LB 0.00 Hz  
 GB 0  
 PC 1.40

F1 - Processing parameters  
 SI 1024  
 MC2 QF  
 SF 100.6127690 MHz  
 WDW QSINE  
 SSB 2  
 LB 0.00 Hz  
 GB 0

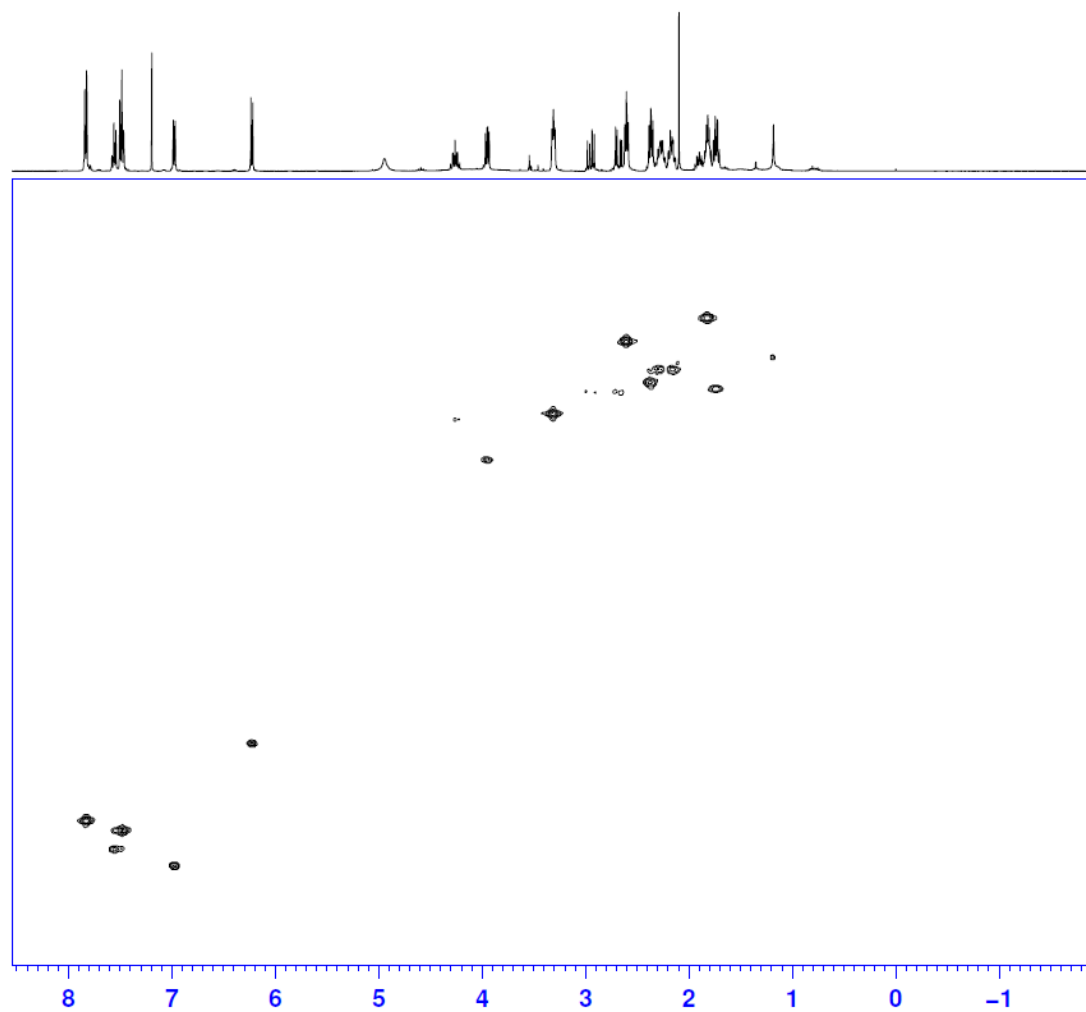

***N*-((*S*)-2,5-Dioxo-1-((1*r*\*,3*R*\*)-3-(2-(5,6,7,8-tetrahydro-1,8-naphthyridin-2-yl)ethyl)cyclobutyl)pyrrolidin-3-yl)-2,4,6-trimethylbenzenesulfonamide [Compound 35]**

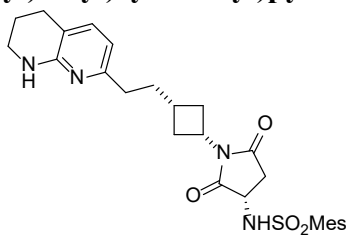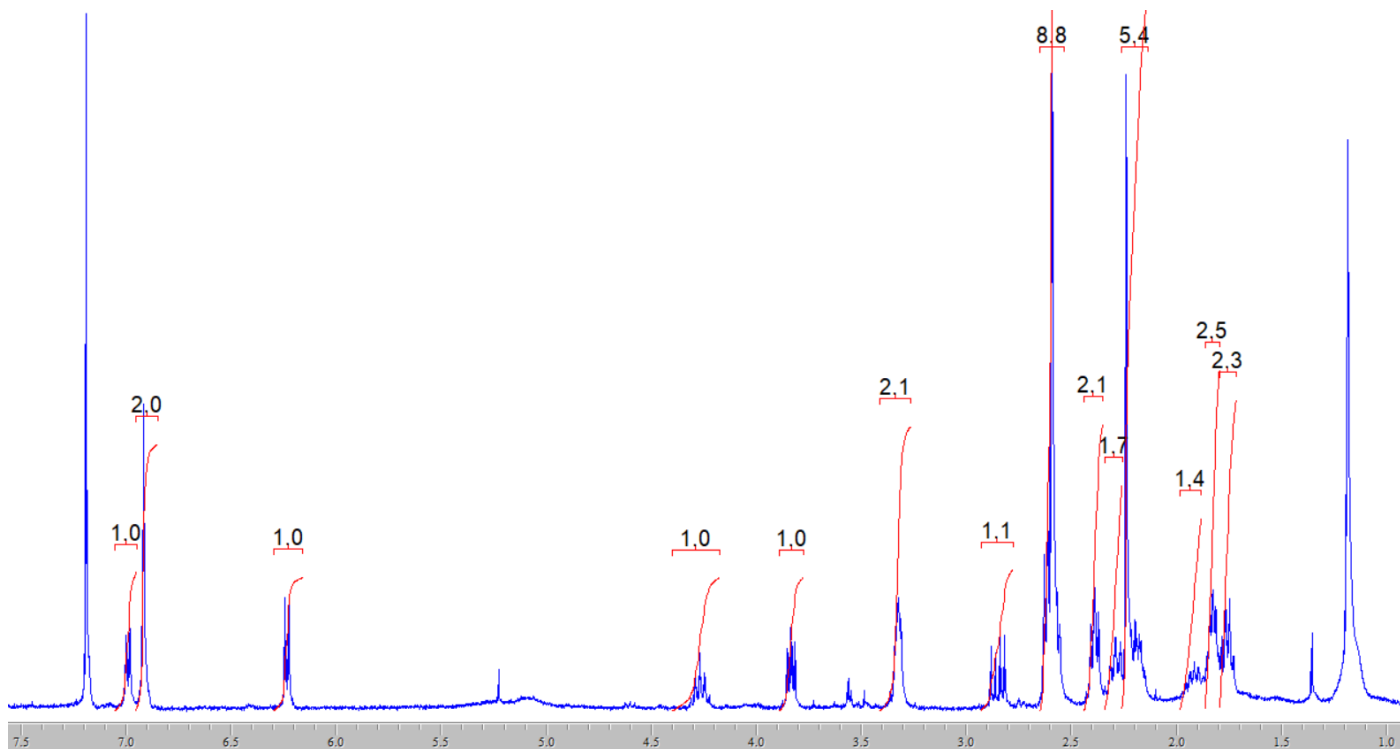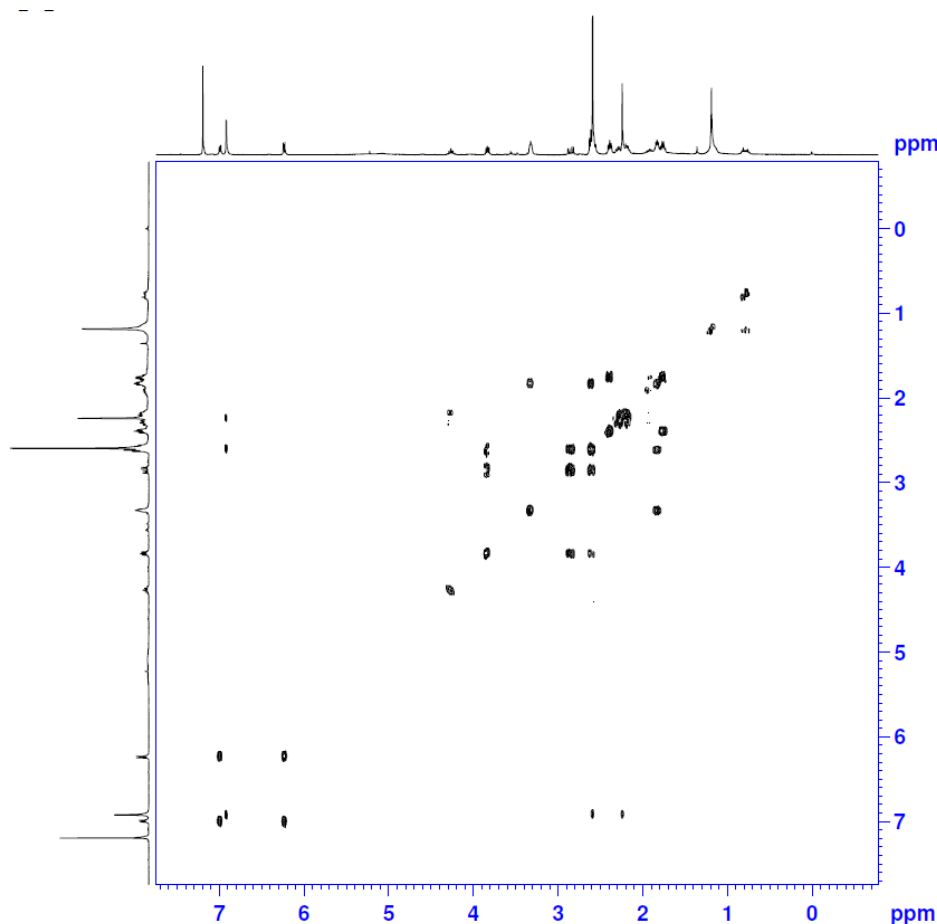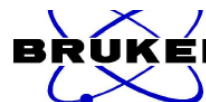

```

Current Data Parameters
NAME          act9-2-2
EXPNO        13
PROCNO       1

F2 - Acquisition Parameters
Date_        20120623
Time         4.29
INSTRUM      DPX400
PROBHD       5 mm QNP 1H/13
PULPROG      cosygmfgf
TD           2048
SOLVENT      CDCl3
NS           4
DS           8
SWH          3415.301 Hz
FIDRES       1.667627 Hz
AQ           0.2998772 sec
RG           6502
DW           146.400 usec
DE           6.00 usec
TE           298.2 K
D0           0.0000300 sec
D1           1.89268506 sec
d13          0.00000400 sec
D16          0.00020000 sec
IN0          0.00029280 sec

----- CHANNEL f1 -----
NUC1         13
P1           10.00 usec
PL1          -1.50 dB
SF01         400.1314298 MHz

----- GRADIENT CHANNEL -----
GPNAM1      SINE.100
GPNAM2      SINE.100
GPNAM3      SINE.100
GPZ1        16.00 %
GPZ2        12.00 %
GPZ3        40.00 %
P16         1000.00 usec

F1 - Acquisition parameters
ND0          1
TD           128
SF01         400.1314 MHz
FIDRES       26.682035 Hz
SW           8.535 ppm
FMODE        QF

F2 - Processing parameters
SI           1024
SF           400.1300373 MHz
WDW          SINE
SSB          0
LB           0.00 Hz
GB           0
PC           1.40

F1 - Processing parameters
SI           1024
MC2          QF
SF           400.1300373 MHz
WDW          SINE
SSB          0
LB           0.00 Hz
GB           0
    
```

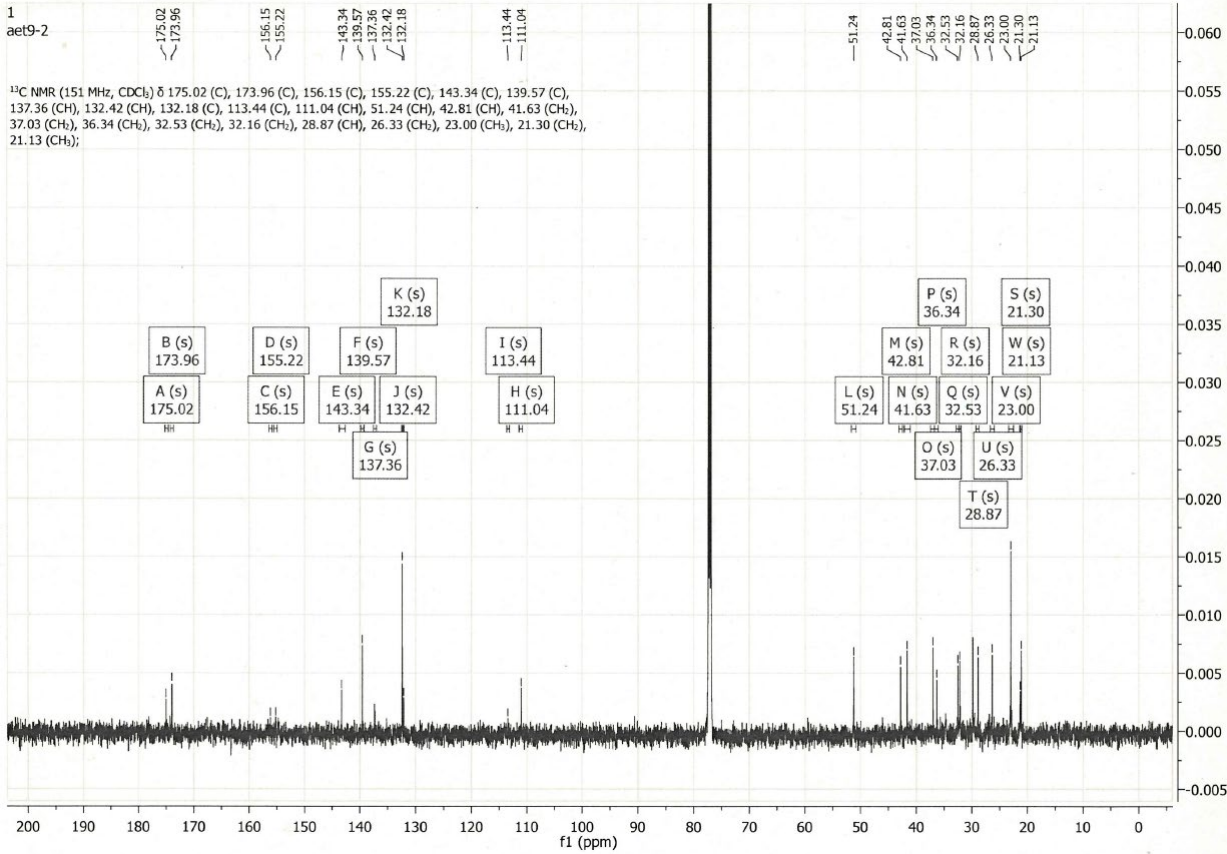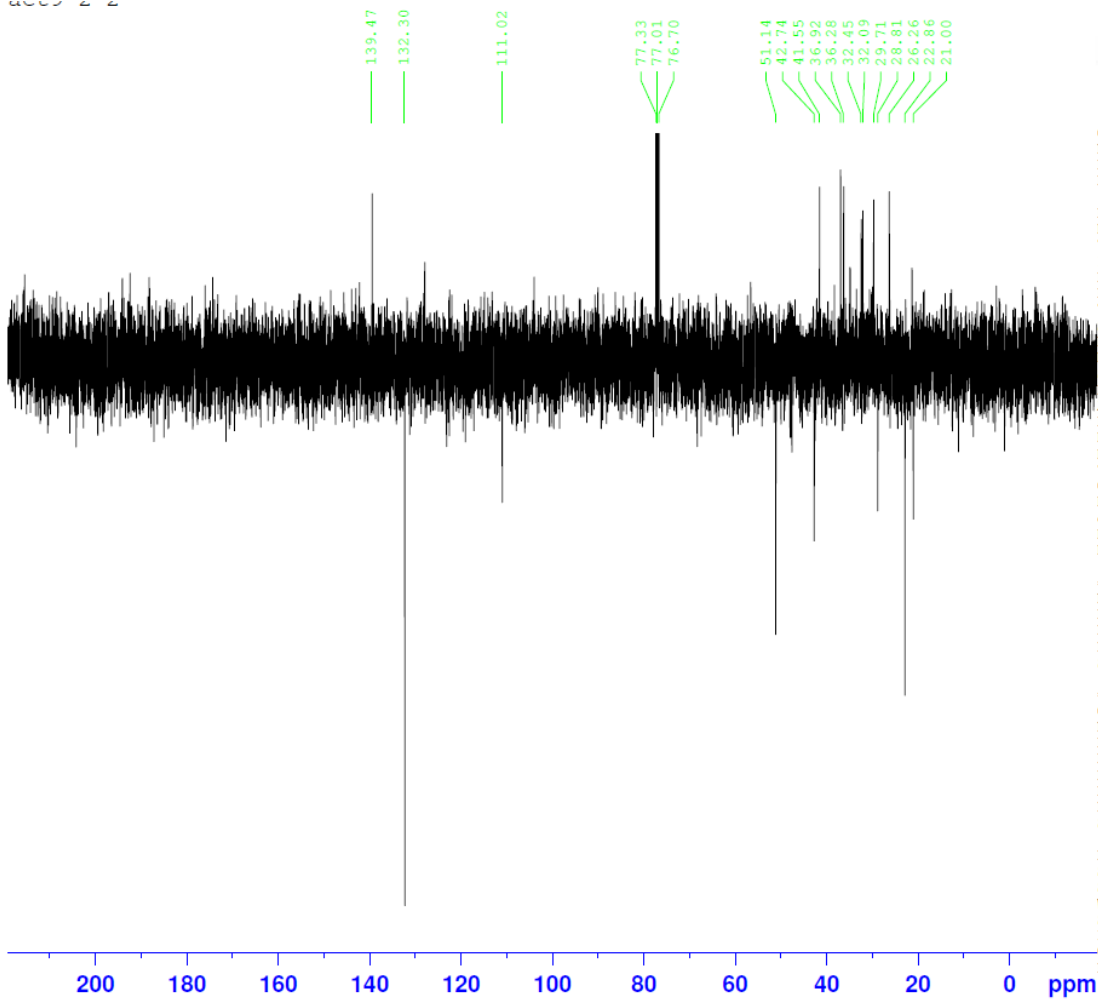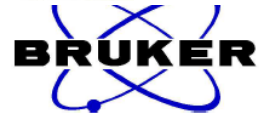

Current Data Parameters  
NAME aet9-2-2  
EXPNO 30  
PROCNO 1

F2 - Acquisition Parameters  
Date\_ 20120705  
Time 22.46  
INSTRUM DPX400  
PROBHD 5 mm QNP 1H/13  
PULPROG deptg\_135  
TD 65536  
SOLVENT CDCl3  
NS 512  
DS 4  
SWH 23980.814 Hz  
FIDRES 0.365918 Hz  
AQ 1.3664756 sec  
RG 13004  
DW 20.850 usec  
DE 6.00 usec  
TE 298.2 K  
CNST2 145.000000  
D1 2.0000000 sec  
d2 0.00344828 sec  
D11 0.0300000 sec  
DELTA 0.00001082 sec

===== CHANNEL f1 =====  
NUC1 13C  
P1 8.50 usec  
P2 17.00 usec  
PL1 -2.60 dB  
SFO1 100.6228300 MHz

===== CHANNEL f2 =====  
CPDPRG2 waltz16  
NUC2 1H  
P3 10.00 usec  
P4 20.00 usec  
PCPD2 80.00 usec  
PL2 -1.50 dB  
PL12 17.50 dB  
SFO2 400.1316000 MHz

F2 - Processing parameters  
SI 32768  
SF 100.6127690 MHz  
WDW EM  
SSB 0  
LB 1.00 Hz  
GB 0  
PC 1.40

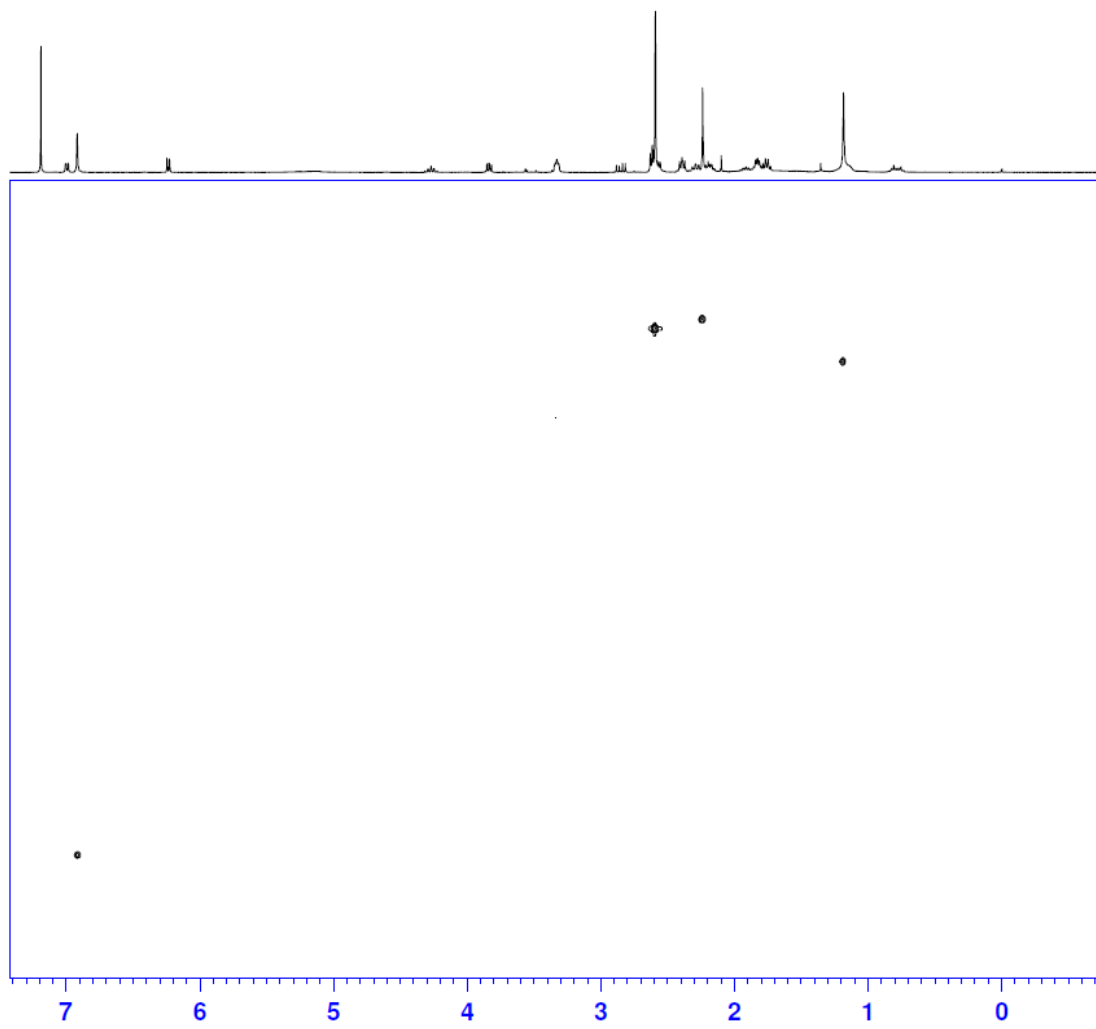

Current Data Parameters  
 NAME act9-2-2  
 EXNO 41  
 PROCNO 1

F2 - Acquisition Parameters  
 Date\_ 20120705  
 Time 22.49  
 INSTRUM DPX400  
 PROBRD 5 mm QNP 1H/13  
 PULPROG hmqcpgf  
 TD 1024  
 SOLVENT cdcl3  
 NS 4  
 DS 16  
 SWH 3272.251 Hz  
 FIDRES 3.195558 Hz  
 AQ 0.1565172 sec  
 RG 4096  
 DW 152.800 usec  
 DE 6.00 usec  
 TE 298.2 K  
 CNST2 145.000000  
 d0 0.0000300 sec  
 d1 1.47030401 sec  
 d2 0.00344828 sec  
 d12 0.00020000 sec  
 d13 0.00000400 sec  
 D16 0.00020000 sec  
 DELTA1 0.00222428 sec  
 INO 0.00003000 sec

==== CHANNEL f1 =====  
 NUC1 1H  
 P1 10.00 usec  
 p2 20.00 usec  
 PL1 -1.50 dB  
 SFO1 400.1313712 MHz

==== CHANNEL f2 =====  
 CPDPRG2 qasp  
 NUC2 13C  
 P3 8.00 usec  
 PCPD2 74.00 usec  
 PL2 -3.00 dB  
 PL12 18.00 dB  
 SFO2 100.6203140 MHz

==== GRADIENT CHANNEL =====  
 GPNAM1 SINE.100  
 GPNAM2 SINE.100  
 GPNAM3 SINE.100  
 GPZ1 50.00 %  
 GPZ2 30.00 %  
 GPZ3 40.10 %  
 P16 1000.00 usec

F1 - Acquisition parameters  
 ND0 2  
 TD 128  
 SFO1 100.6203 MHz  
 FIDRES 130.208328 Hz  
 SW 165.639 ppm  
 FmMODE QF

F2 - Processing parameters  
 SI 1024  
 SF 400.1300372 MHz  
 WW QSINE  
 SSB 2  
 LB 0.00 Hz  
 GB 0  
 PC 1.40

F1 - Processing parameters  
 SI 1024  
 MC2 QF  
 SF 100.6127650 MHz  
 WW QSINE  
 SSB 2  
 LB 0.00 Hz  
 GB 0

(S)-4-(*tert*-butoxy)-4-oxo-2-(phenylsulfonamido)butanoic acid [Compound 36]

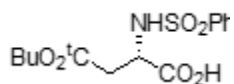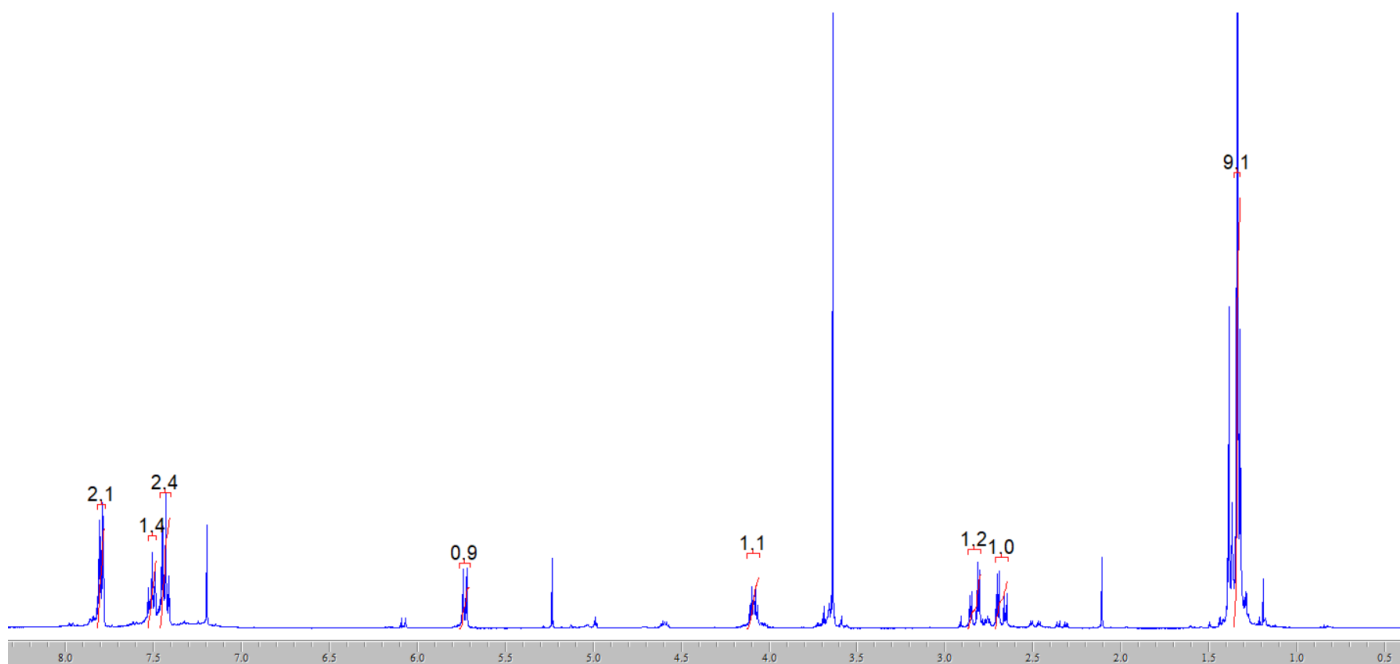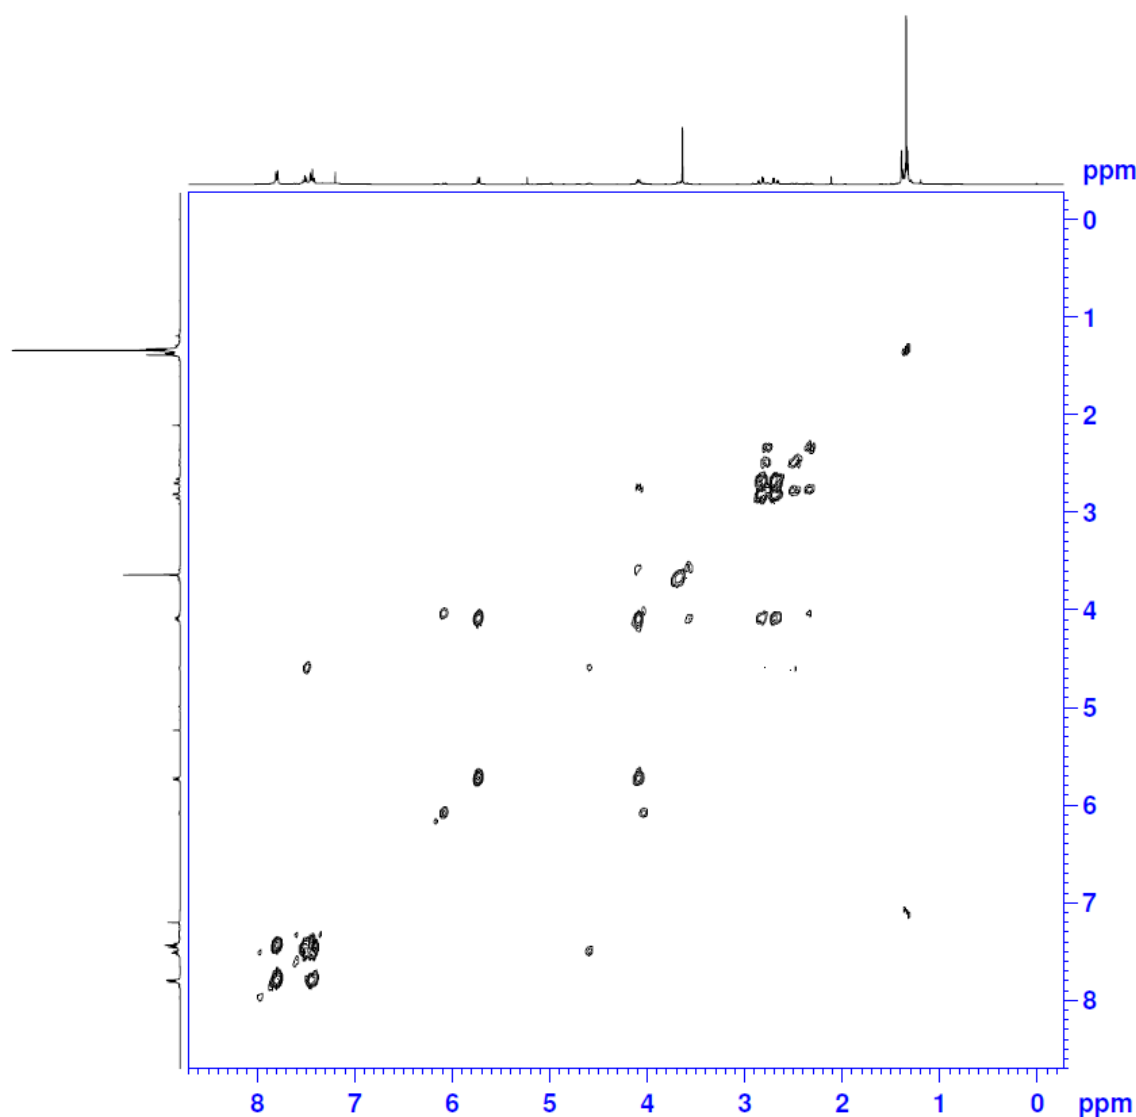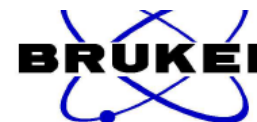

Current Data Parameters  
NAME aet9-6  
EXPNO 13  
PROCNO 1

F2 - Acquisition Parameters  
Date\_ 20121003  
Time 0.24  
INSTRUM DPX400  
PROBHD 5 mm QNP 1H/13  
PULPROG cosygpmfzf  
ID 2048  
SOLVENT CDCl3  
NS 4  
DS 8  
SWH 3591.954 Hz  
FIDRES 1.753884 Hz  
AQ 0.2851316 sec  
RG 9195.2  
DW 139.200 usec  
DE 6.00 usec  
TE 292.2 K  
D0 0.00000300 sec  
D1 1.90702105 sec  
d13 0.00000400 sec  
D16 0.00020000 sec  
IN0 0.00027840 sec

----- CHANNEL f1 -----  
NUC1 1H  
P1 10.00 usec  
PL1 -1.50 dB  
SFO1 400.1317199 MHz

----- GRADIENT CHANNEL -----  
GPNAM1 SINE.100  
GPNAM2 SINE.100  
GPNAM3 SINE.100  
GPZ1 16.00 %  
GPZ2 12.00 %  
GPZ3 40.00 %  
P16 1000.00 usec

F1 - Acquisition parameters  
ND0 1  
ID 128  
SFO1 400.1317 MHz  
FIDRES 28.062141 Hz  
SW 8.977 ppm  
FMODE QF

F2 - Processing parameters  
SI 1024  
SF 400.1300341 MHz  
WDW SINE  
SSB 0  
LB 0.00 Hz  
GB 0  
PC 1.40

F1 - Processing parameters  
SI 1024  
MC2 QF  
SF 400.1300341 MHz  
WDW SINE  
SSB 0  
LB 0.00 Hz  
GB 0

aet9-6

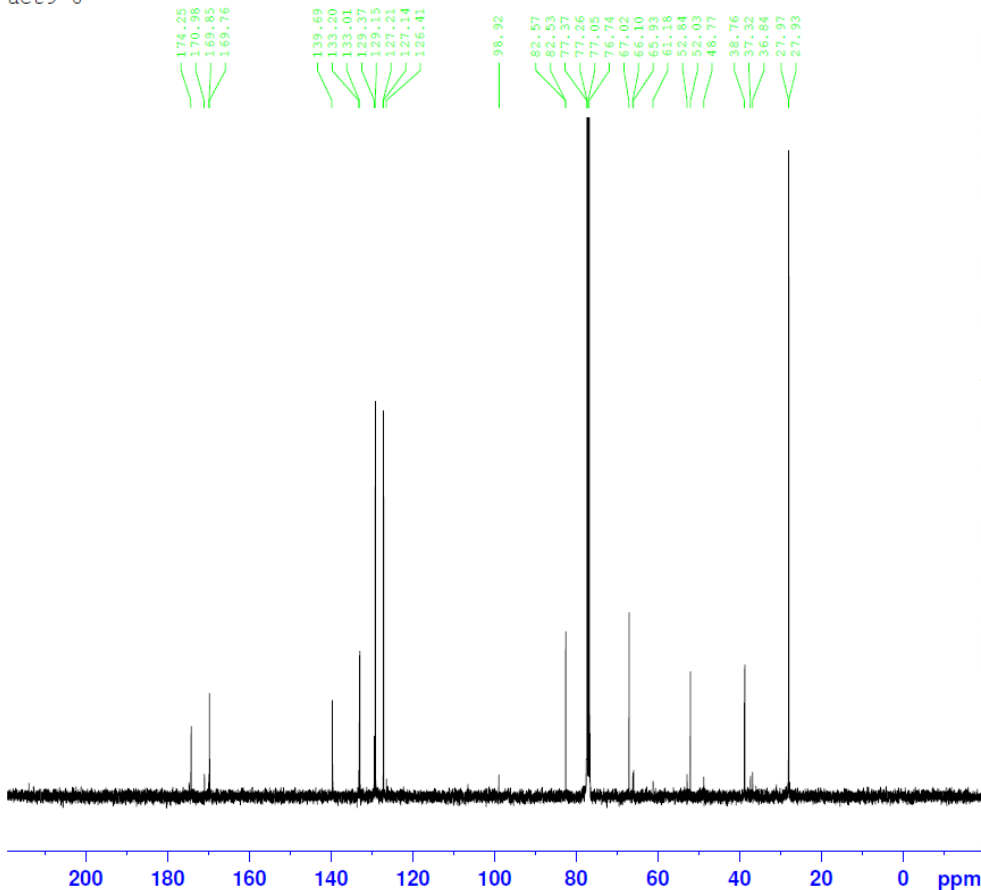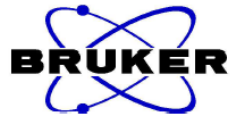

Current Data Parameters  
 NAME aet9-6  
 EXPNO 11  
 PROCNO 1  
 F2 - Acquisition Parameters  
 Date\_ 20121002  
 Time 23.53  
 INSTRUM DPX400  
 PROBHD 5 mm QNP 1H/13  
 PULPROG zgpg30  
 TD 65536  
 SOLVENT CDCl3  
 NS 1024  
 DS 4  
 SWH 23980.814 Hz  
 FIDRES 0.365918 Hz  
 AQ 1.3664756 sec  
 RG 912.3  
 DW 20.850 usec  
 DE 6.00 usec  
 TE 293.2 K  
 D1 2.00000000 sec  
 d11 0.03000000 sec  
 DELTA 1.89999998 sec  
 TD0 1

===== CHANNEL f1 =====  
 NUC1 13C  
 P1 8.50 usec  
 PL1 -2.60 dB  
 SFO1 100.6228298 MHz

===== CHANNEL f2 =====  
 CPDPRG2 waltz16  
 NUC2 1H  
 PCPD2 80.00 usec  
 PL2 -1.50 dB  
 PL12 17.50 dB  
 PL13 17.50 dB  
 SFO2 400.1316005 MHz

F2 - Processing parameters  
 SI 32768  
 SF 100.6127690 MHz  
 WDW EM  
 SSB 0  
 LB 1.00 Hz  
 GB 0  
 PC 1.40

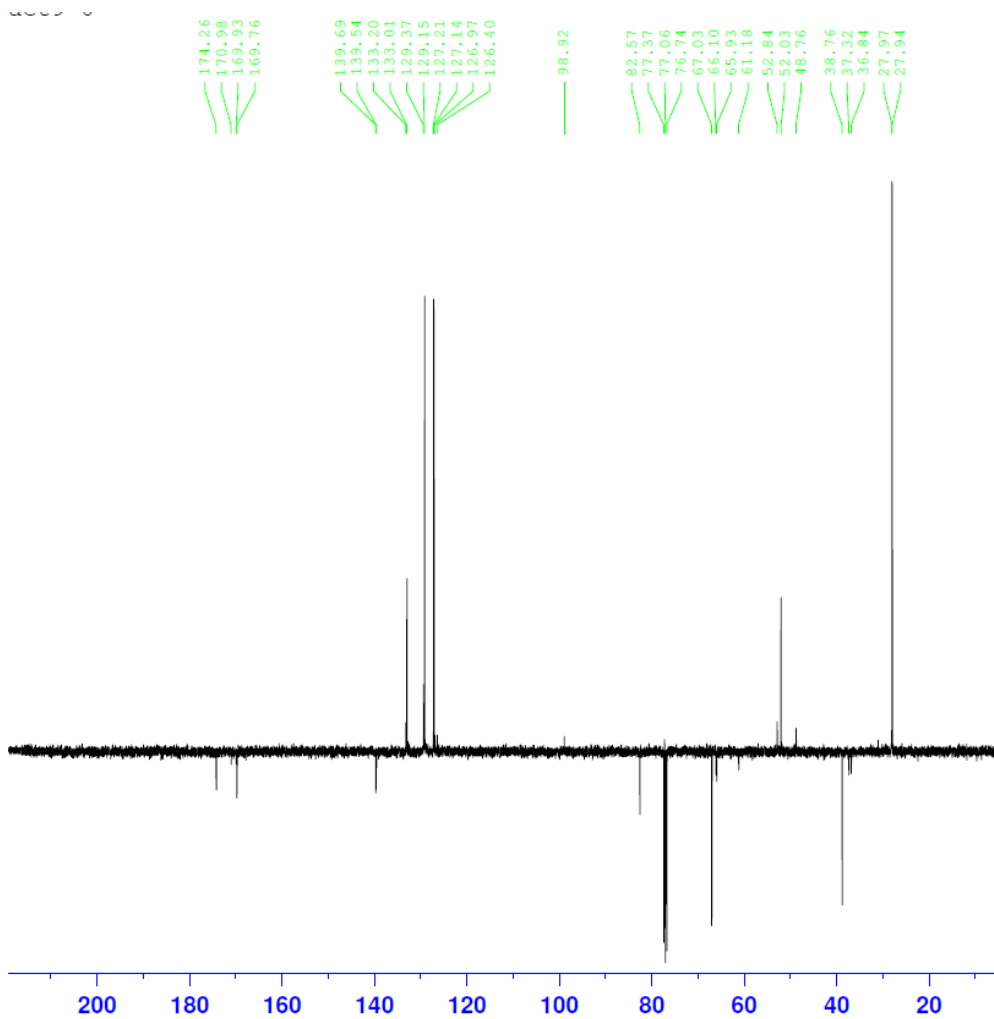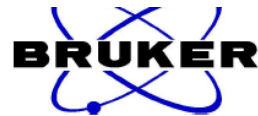

Current Data Parameters  
 NAME aet9-6  
 EXPNO 12  
 PROCNO 1  
 F2 - Acquisition Parameters  
 Date\_ 20121003  
 Time 0.23  
 INSTRUM DPX400  
 PROBHD 5 mm QNP 1H/13  
 PULPROG deptg\_135  
 TD 65536  
 SOLVENT CDCl3  
 NS 512  
 DS 4  
 SWH 23980.814 Hz  
 FIDRES 0.365918 Hz  
 AQ 1.3664756 sec  
 RG 18390.4  
 DW 20.850 usec  
 DE 6.00 usec  
 TE 292.2 K  
 CNST2 145.0000000  
 D1 2.00000000 sec  
 d2 0.00344828 sec  
 D11 0.03000000 sec  
 DELTA 0.00001082 sec

===== CHANNEL f1 =====  
 NUC1 13C  
 P1 8.50 usec  
 P2 17.00 usec  
 PL1 -2.60 dB  
 SFO1 100.6228300 MHz

===== CHANNEL f2 =====  
 CPDPRG2 waltz16  
 NUC2 1H  
 P3 10.00 usec  
 P4 20.00 usec  
 PCPD2 80.00 usec  
 PL2 -1.50 dB  
 PL12 17.50 dB  
 SFO2 400.1316000 MHz

F2 - Processing parameters  
 SI 32768  
 SF 100.6127690 MHz  
 WDW EM  
 SSB 0  
 LB 1.00 Hz  
 GB 0  
 PC 1.40



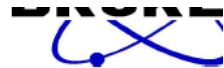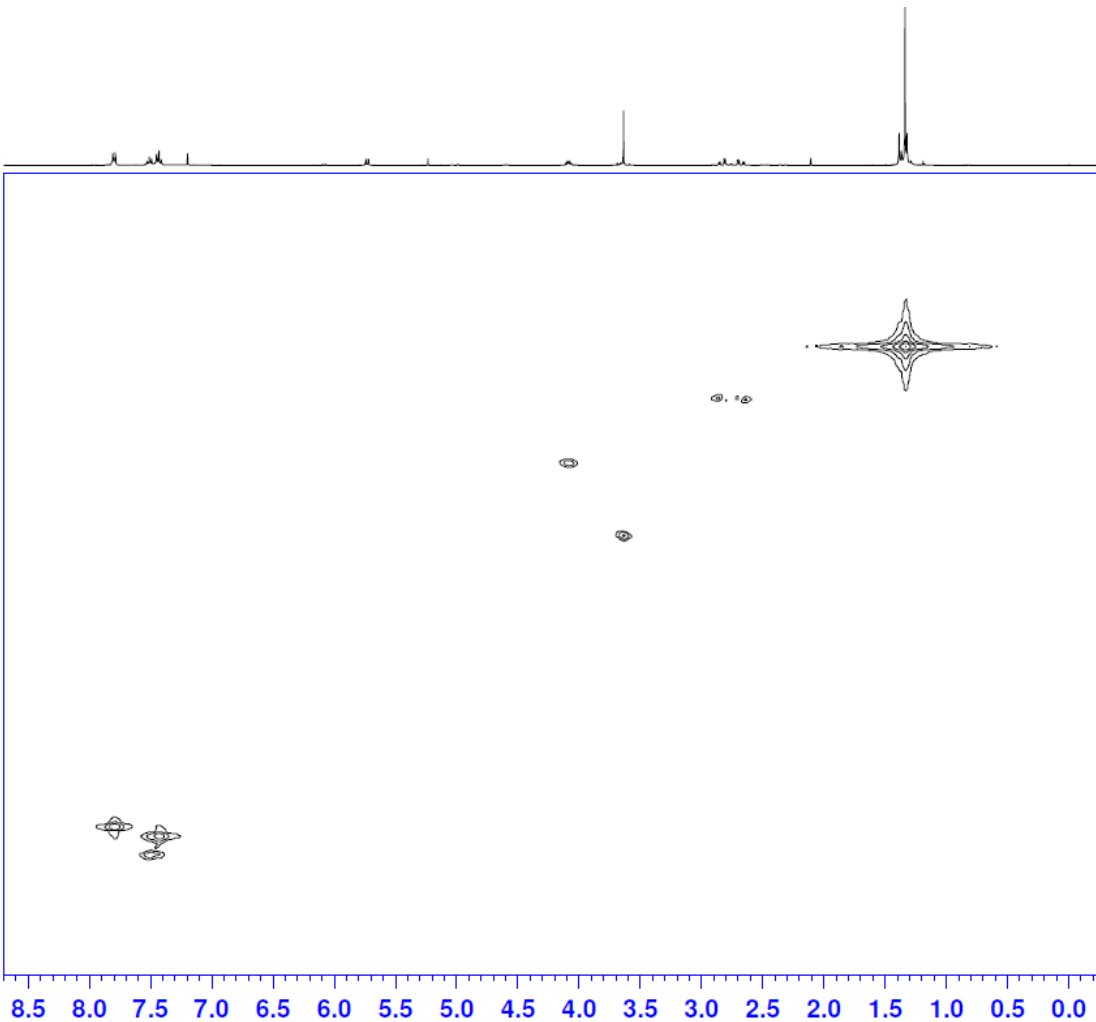

Current Data Parameters  
 NAME set9-6  
 EXPNO 14  
 PROCNO 1

F2 - Acquisition Parameters  
 Date\_ 20121003  
 Time 0.44  
 INSTRUM DPX400  
 PROBHD 5 mm QNP 1H/13  
 PULPROG hmcgpgpf  
 TD 1024  
 SOLVENT CDCl3  
 NS 4  
 DS 16  
 SWH 3591.954 Hz  
 FIDRES 3.507768 Hz  
 AQ 0.1425908 sec  
 RG 26008  
 DW 139.200 usec  
 DE 6.00 usec  
 TE 292.2 K  
 CMBT2 145.000000  
 d0 0.0000300 sec  
 d1 1.48464000 sec  
 d2 0.00344828 sec  
 d12 0.00020000 sec  
 d13 0.00004000 sec  
 D16 0.00020000 sec  
 DELTA1 0.00222428 sec  
 IN0 0.00030000 sec

==== CHANNEL f1 =====  
 NUC1 1H  
 P1 10.00 usec  
 p2 20.00 usec  
 PL1 -1.50 dB  
 SFO1 400.1317199 MHz

==== CHANNEL f2 =====  
 CPDPRG2 gairp  
 NUC2 13C  
 P3 8.00 usec  
 PCPD2 74.00 usec  
 PL2 -3.00 dB  
 PL12 18.00 dB  
 SFO2 100.6203140 MHz

==== GRADIENT CHANNEL =====  
 GPNAM1 SINE.100  
 GPNAM2 SINE.100  
 GPNAM3 SINE.100  
 GPZ1 50.00 %  
 GPZ2 30.00 %  
 GPZ3 40.10 %  
 P16 1000.00 usec

F1 - Acquisition parameters  
 ND0 2  
 TD 128  
 SFO1 100.6203 MHz  
 FIDRES 130.208328 Hz  
 SW 165.639 ppm  
 FMODE QF

F2 - Processing parameters  
 SI 1024  
 SF 400.1300341 MHz  
 WW QSINE  
 SSB 2  
 LB 0.00 Hz  
 GB 0  
 PC 1.40

F1 - Processing parameters  
 SI 1024  
 MC2 QF  
 SF 100.6127690 MHz  
 WW QSINE  
 SSB 2  
 LB 0.00 Hz  
 GB 0

tert-butyl (S)-4-(((1*r*\*,3*R*\*)-3-(2-(1,8-naphthyridin-2-yl)ethyl)cyclobutyl)amino)-4-oxo-3-

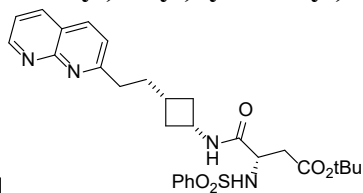

(phenylsulfonamido)butanoate [Compound 37]

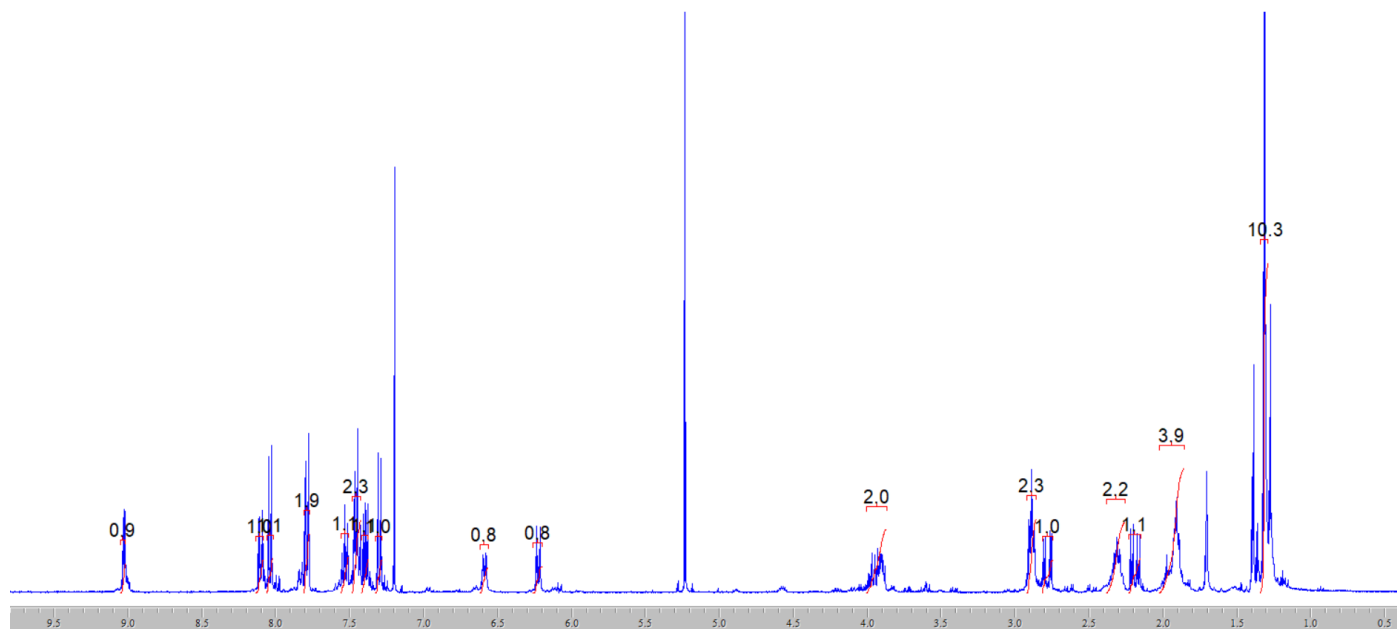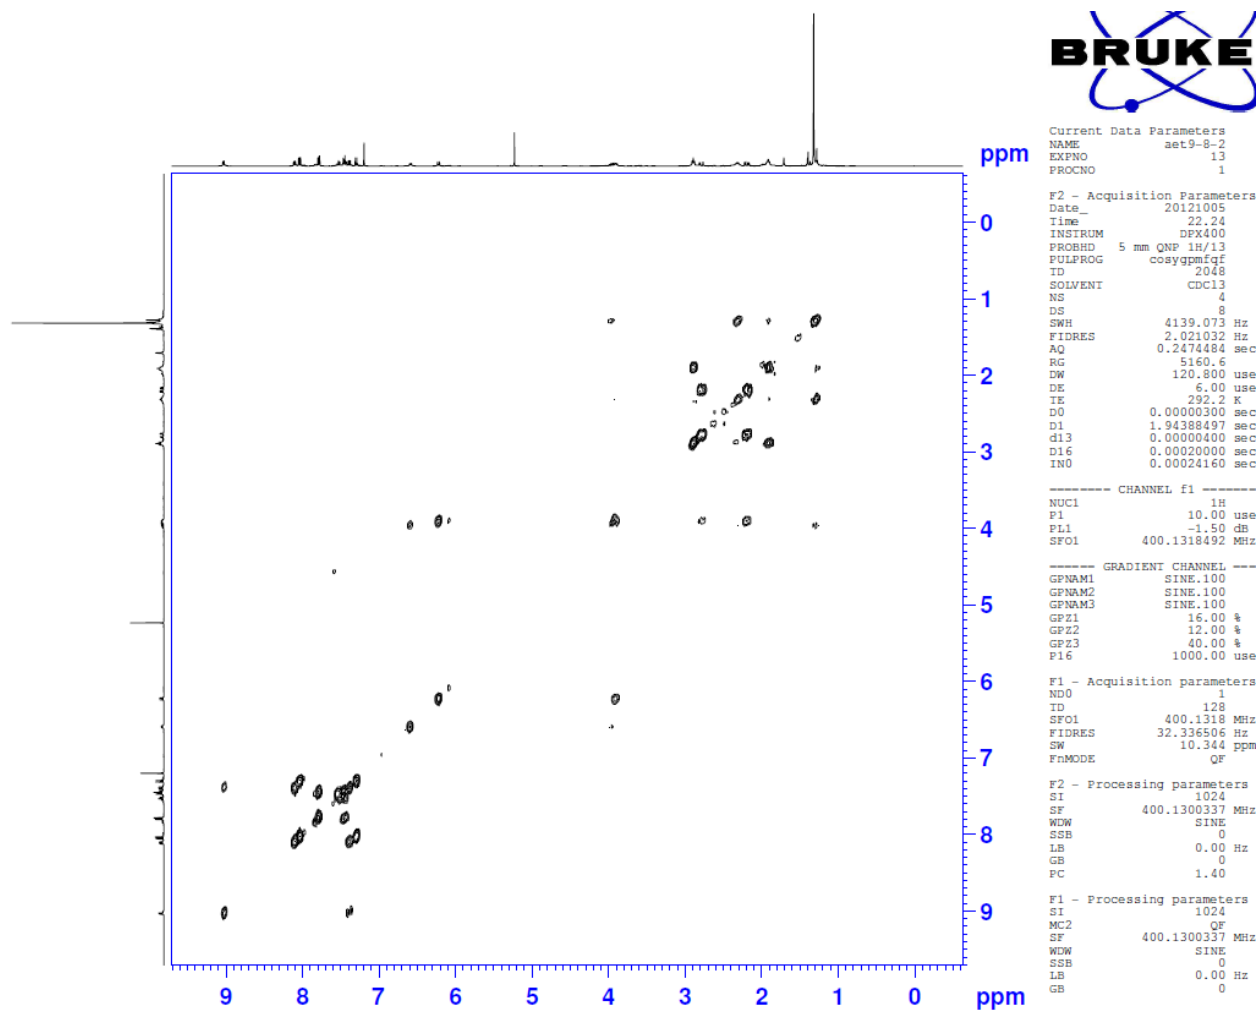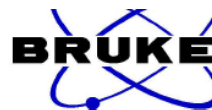

Current Data Parameters  
 NAME act9-8-2  
 EXPNO 13  
 PROCNO 1

F2 - Acquisition Parameters  
 Date\_ 20121005  
 Time 22.24  
 INSTRUM DFX400  
 PROBHD 5 mm QNP 1H/13  
 PULPROG cosygmrgf2  
 TD 2048  
 SOLVENT CDCl3  
 NS 4  
 DS 8  
 SWH 4139.073 Hz  
 FIDRES 2.021032 Hz  
 AQ 0.2474484 sec  
 RG 5160.6  
 DW 120.800 use  
 DE 6.00 use  
 TE 292.2 K  
 D0 0.00000300 sec  
 D1 1.94388497 sec  
 d13 0.00000400 sec  
 D16 0.00020000 sec  
 IN0 0.00024160 sec

----- CHANNEL f1 -----  
 NUC1 1H  
 P1 10.00 use  
 PL1 -1.50 dB  
 SFO1 400.1318492 MHz

----- GRADIENT CHANNEL -----  
 GPNAM1 SINE.100  
 GPNAM2 SINE.100  
 GPNAM3 SINE.100  
 GPZ1 16.00 %  
 GPZ2 12.00 %  
 GPZ3 40.00 %  
 P16 1000.00 use

F1 - Acquisition parameters  
 ND0 1  
 TD 128  
 SFO1 400.1318 MHz  
 FIDRES 32.336506 Hz  
 SW 10.344 ppm  
 F1MODE QF

F2 - Processing parameters  
 SI 1024  
 SF 400.1300337 MHz  
 WDW SINE  
 SSB 0  
 LB 0.00 Hz  
 GB 0  
 PC 1.40

F1 - Processing parameters  
 SI 1024  
 MC2 QF  
 SF 400.1300337 MHz  
 WDW SINE  
 SSB 0  
 LB 0.00 Hz  
 GB 0

aet9-8-2

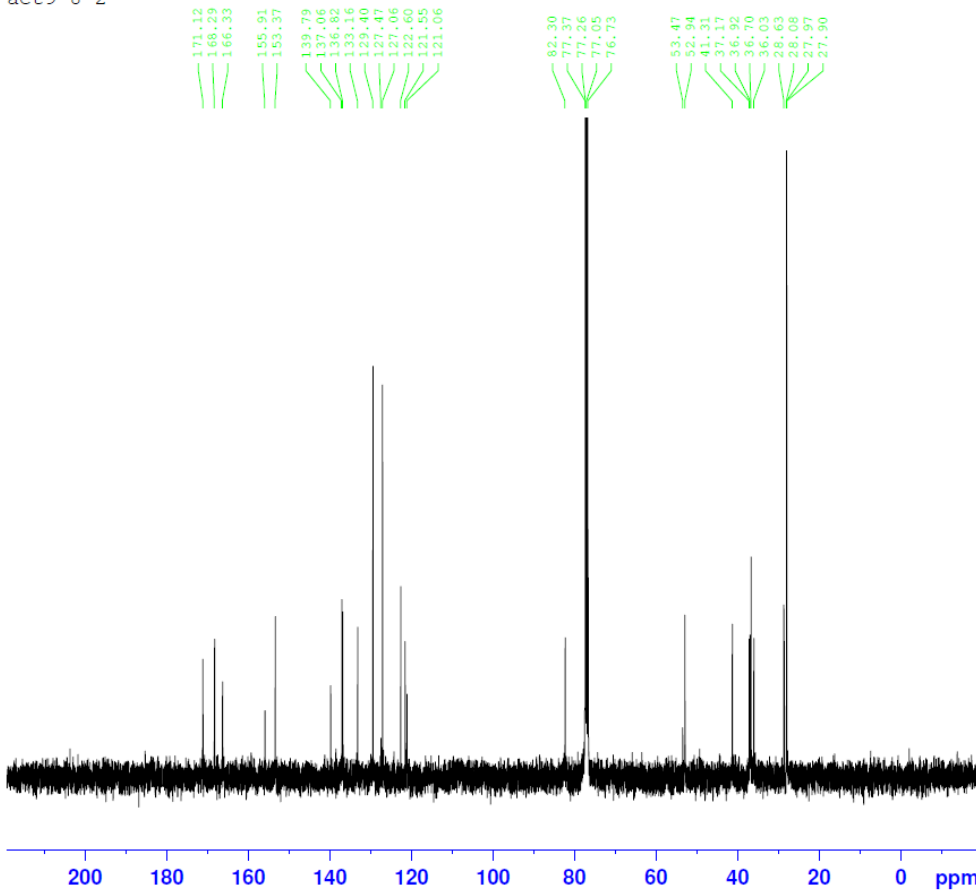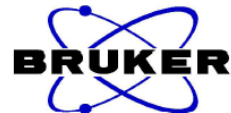

Current Data Parameters  
 NAME aet9-8-2  
 EXPNO 11  
 PROCNO 1  
 F2 - Acquisition Parameters  
 Date\_ 20121005  
 Time 21.53  
 INSTRUM DPX400  
 PROBHD 5 mm QNP 1H/13  
 PULPROG zgpg30  
 TD 65536  
 SOLVENT CDCl3  
 NS 1024  
 DS 4  
 SWH 23980.814 Hz  
 FIDRES 0.365918 Hz  
 AQ 1.3664756 sec  
 RG 724.1  
 DW 20.850 usec  
 DE 6.00 usec  
 TE 293.2 K  
 D1 2.00000000 sec  
 d11 0.03000000 sec  
 DELTA 1.89999998 sec  
 TD0 1

==== CHANNEL f1 =====  
 NUC1 13C  
 P1 8.50 usec  
 PL1 -2.60 dB  
 SFO1 100.6228298 MHz

==== CHANNEL f2 =====  
 CPDPRG2 waltz16  
 NUC2 1H  
 PCPD2 80.00 usec  
 PL2 -1.50 dB  
 PL12 17.50 dB  
 PL13 17.50 dB  
 SFO2 400.1316005 MHz

F2 - Processing parameters  
 SI 32768  
 SF 100.6127690 MHz  
 WDW EM  
 SSB 0  
 LB 1.00 Hz  
 GB 0  
 PC 1.40

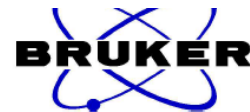

Current Data Parameters  
 NAME aet9-8-2  
 EXPNO 12  
 PROCNO 1

F2 - Acquisition Parameters  
 Date\_ 20121005  
 Time 22.24  
 INSTRUM DPX400  
 PROBHD 5 mm QNP 1H/13  
 PULPROG deptq\_135  
 TD 65536  
 SOLVENT CDCl3  
 NS 512  
 DS 4  
 SWH 23980.814 Hz  
 FIDRES 0.365918 Hz  
 AQ 1.3664756 sec  
 RG 20642.5  
 DW 20.850 usec  
 DE 6.00 usec  
 TE 292.2 K  
 CNST2 145.0000000  
 D1 2.00000000 sec  
 d2 0.00344828 sec  
 D11 0.03000000 sec  
 DELTA 0.00001082 sec

==== CHANNEL f1 =====  
 NUC1 13C  
 P1 8.50 usec  
 P2 17.00 usec  
 PL1 -2.60 dB  
 SFO1 100.6228300 MHz

==== CHANNEL f2 =====  
 CPDPRG2 waltz16  
 NUC2 1H  
 P3 10.00 usec  
 P4 20.00 usec  
 PCPD2 80.00 usec  
 PL2 -1.50 dB  
 PL12 17.50 dB  
 SFO2 400.1316000 MHz

F2 - Processing parameters  
 SI 32768  
 SF 100.6127690 MHz  
 WDW EM  
 SSB 0  
 LB 1.00 Hz  
 GB 0  
 PC 1.40

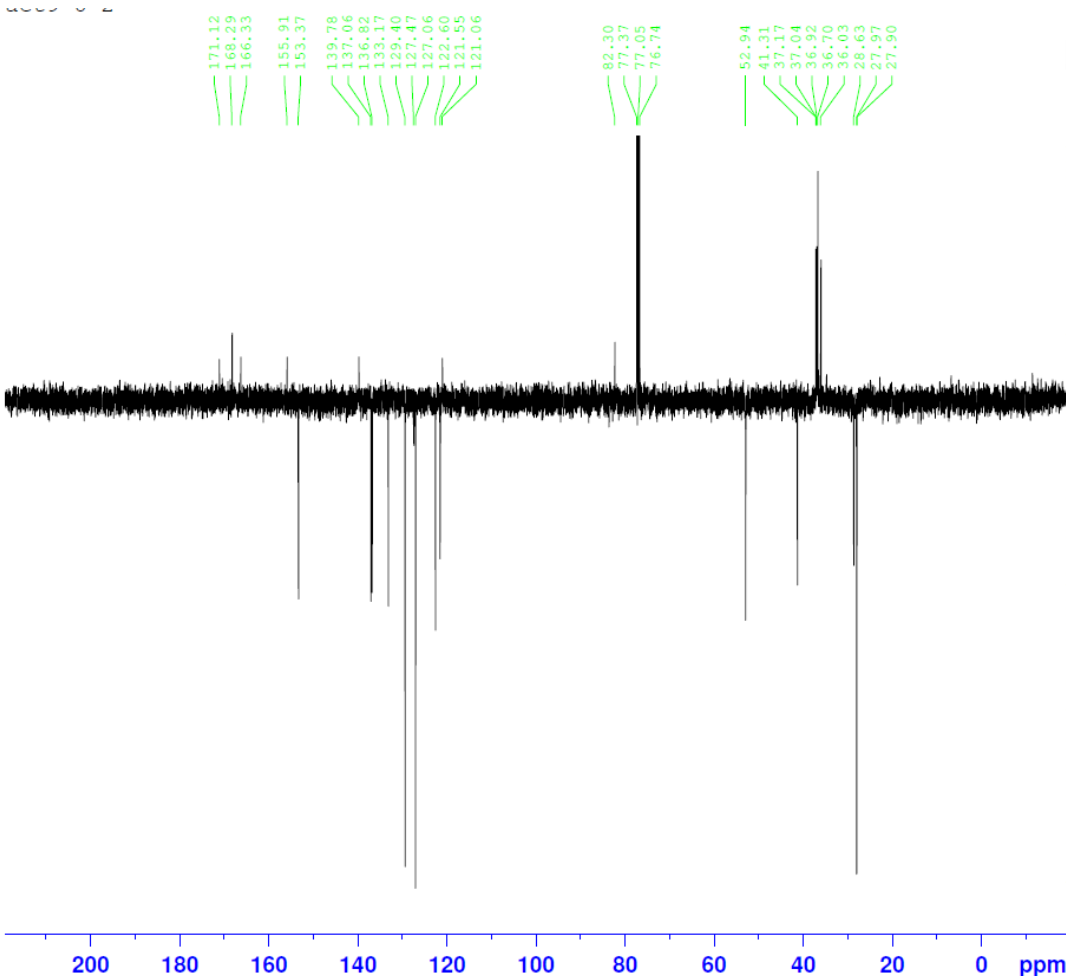

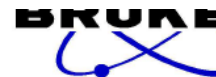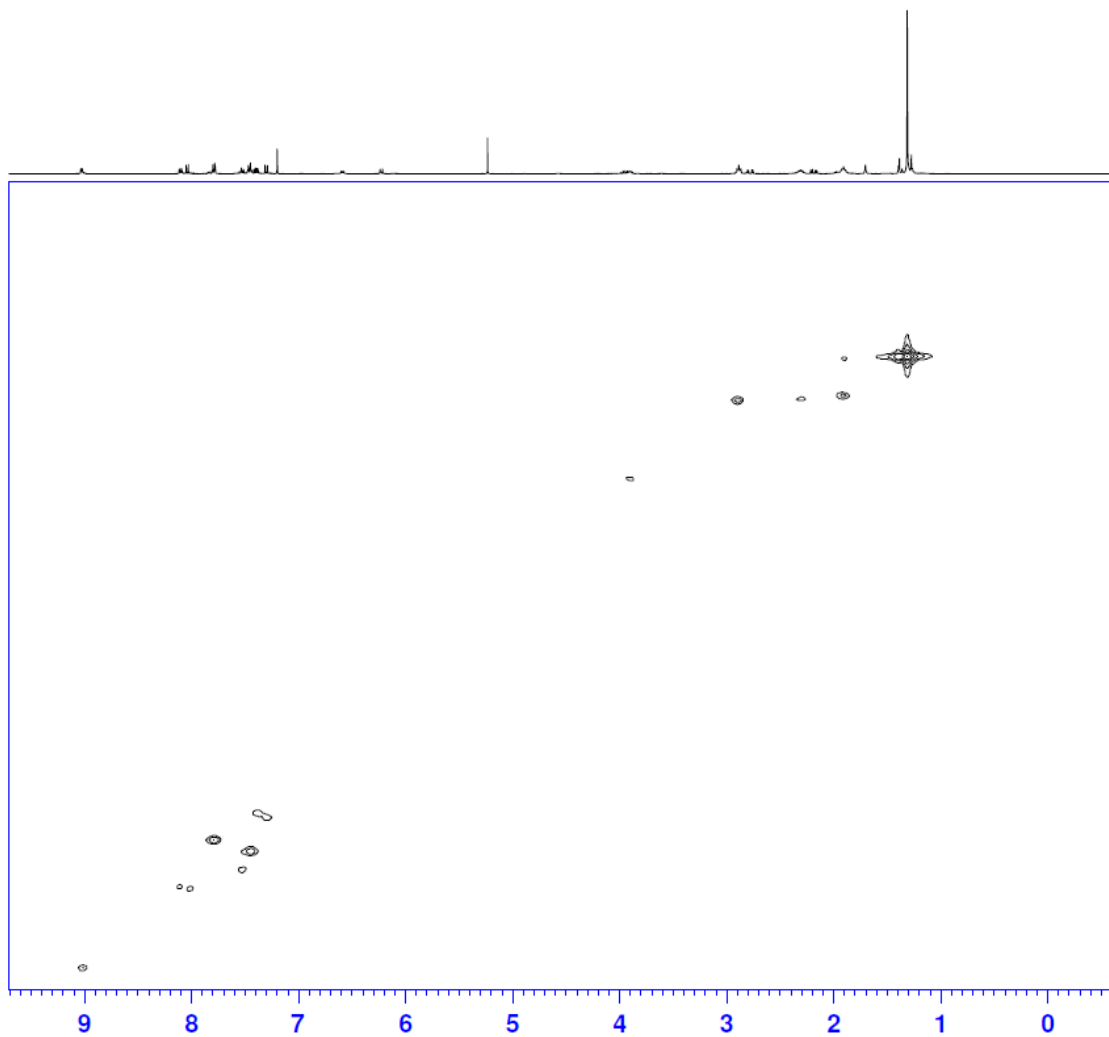

Current Data Parameters  
NAME act9-8-2  
EXPNO 14  
PROCNO 1

F2 - Acquisition Parameters  
Date\_ 20121005  
Time 22.44  
INSTRUM BRX400  
PROBHD 5 mm QNP 1H/13  
PULPROG hmqcpgpgf  
TD 1024  
SOLVENT cdc13  
NS 4  
DS 16  
SWH 4139.073 Hz  
FIDRES 4.042063 Hz  
AQ 0.1237492 sec  
RG 26008  
DW 120.800 usec  
DE 6.00 usec  
TE 292.2 K  
CNST2 145.000000  
d0 0.0000300 sec  
D1 1.50307202 sec  
d2 0.00344828 sec  
d12 0.0002000 sec  
d13 0.0000400 sec  
D16 0.0002000 sec  
DELTA1 0.00222428 sec  
IND 0.0000300 sec

==== CHANNEL f1 =====  
NUC1 1H  
P1 10.00 usec  
p2 20.00 usec  
PL1 -1.50 dB  
SFO1 400.1318492 MHz

==== CHANNEL f2 =====  
PCPDRC2 gspg  
NUC2 13C  
P3 8.00 usec  
PCPD2 74.00 usec  
PL2 -3.00 dB  
PL12 18.00 dB  
SFO2 100.6203140 MHz

==== GRADIENT CHANNEL =====  
GPNAM1 SINE.100  
GPNAM2 SINE.100  
GPNAM3 SINE.100  
GPZ1 50.00 %  
GPZ2 30.00 %  
GPZ3 40.10 %  
P16 1000.00 usec

F1 - Acquisition parameters  
ND0 2  
TD 128  
SFO1 100.6203 MHz  
FIDRES 130.208328 Hz  
SW 165.639 ppm  
FmMODE QF

F2 - Processing parameters  
SI 1024  
SF 400.1300337 MHz  
WDW QSINE  
SSB 2  
LB 0.00 Hz  
GB 0  
PC 1.40

F1 - Processing parameters  
SI 1024  
MC2 QF  
SF 100.6127690 MHz  
WDW QSINE  
SSB 2  
LB 0.00 Hz  
GB 0

(S)-4-(((1R\*,3R\*)-3-(2-(1,8-naphthyridin-2-yl)ethyl)cyclobutyl)amino)-4-oxo-3-

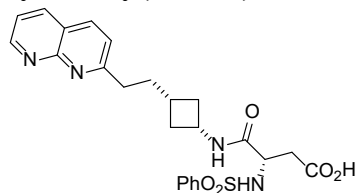

(phenylsulfonamido)butanoic acid [Compound 38]

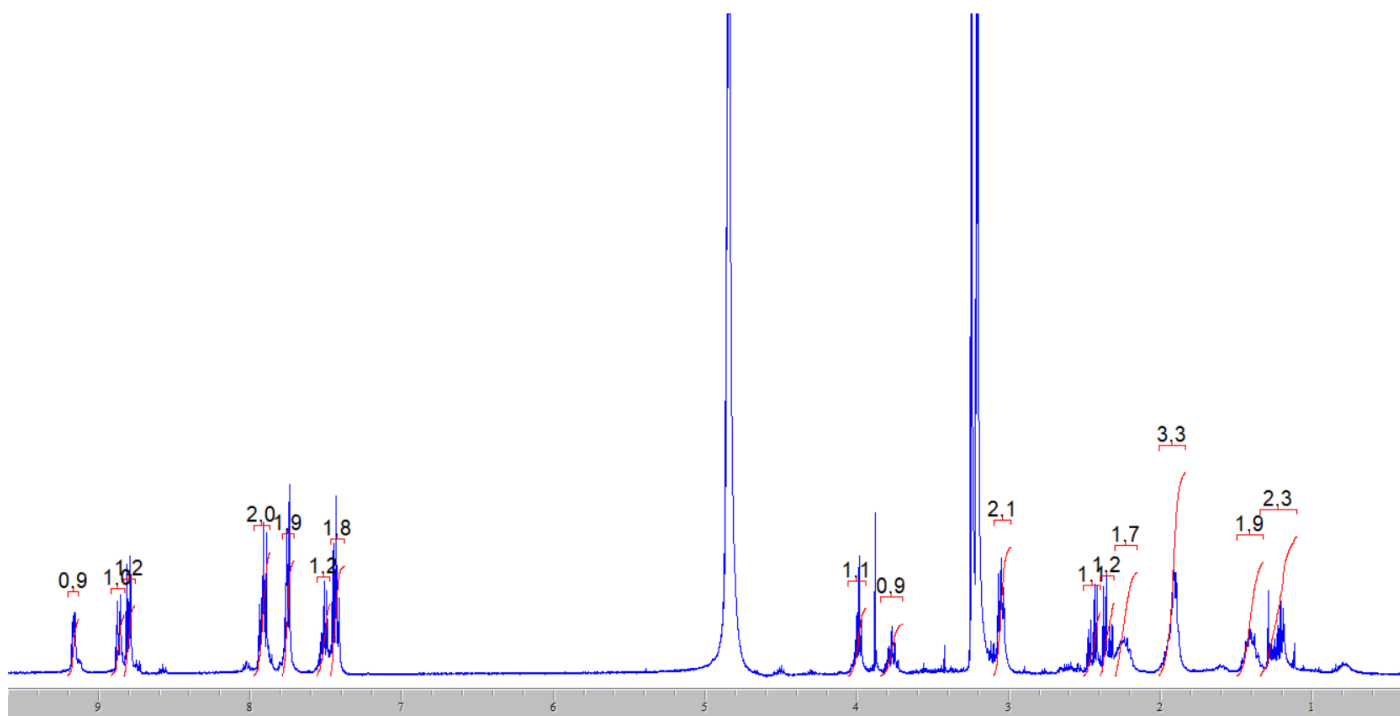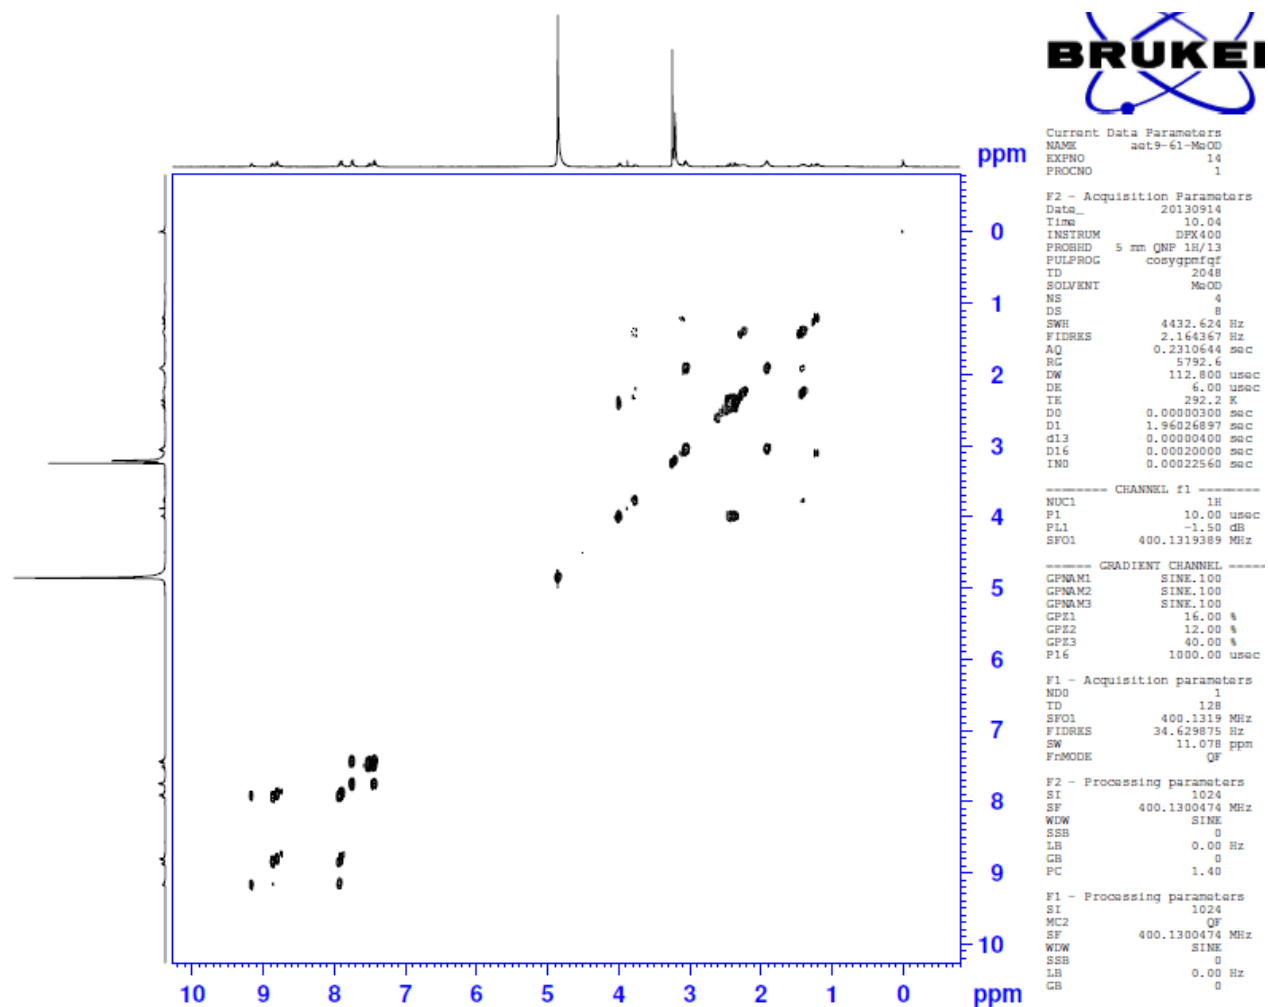

aet9-61-MeOD

153.48  
144.19  
144.07  
133.91  
130.22  
128.19  
126.08  
124.96

54.61  
49.87  
49.66  
49.54  
49.23  
48.02  
48.81  
48.39  
42.37  
37.93  
37.12  
36.98  
36.85  
35.80  
29.71

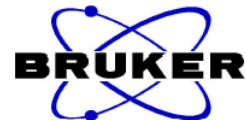

Current Data Parameters  
NAME aet9-61-MeOD  
EXPNO 11  
PROCNO 1

F2 - Acquisition Parameters  
Date\_ 20130914  
Time 9.20  
INSTRUM DPX400  
PROBHD 5 mm QNP 1H/13  
PULPROG zgpg30  
TD 65536  
SOLVENT MeOD  
NS 1024  
DS 4  
SWH 23980.814 Hz  
FIDRES 0.365918 Hz  
AQ 1.3664756 sec  
RG 2896.3  
DW 20.850 usec  
DE 6.00 usec  
TE 293.2 K  
D1 2.00000000 sec  
d11 0.03000000 sec  
DELTA 1.89999998 sec  
TD0 1

===== CHANNEL f1 =====  
NUC1 13C  
P1 9.00 usec  
PL1 -2.60 dB  
SFO1 100.6228298 MHz

===== CHANNEL f2 =====  
CPDPRG2 waltz16  
NUC2 1H  
PCPD2 80.00 usec  
PL2 -1.50 dB  
PL12 17.50 dB  
PL13 17.50 dB  
SFO2 400.1316005 MHz

F2 - Processing parameters  
SI 32768  
SF 100.6126261 MHz  
WDW EM  
SSB 0  
LB 1.00 Hz  
GB 0  
PC 1.40

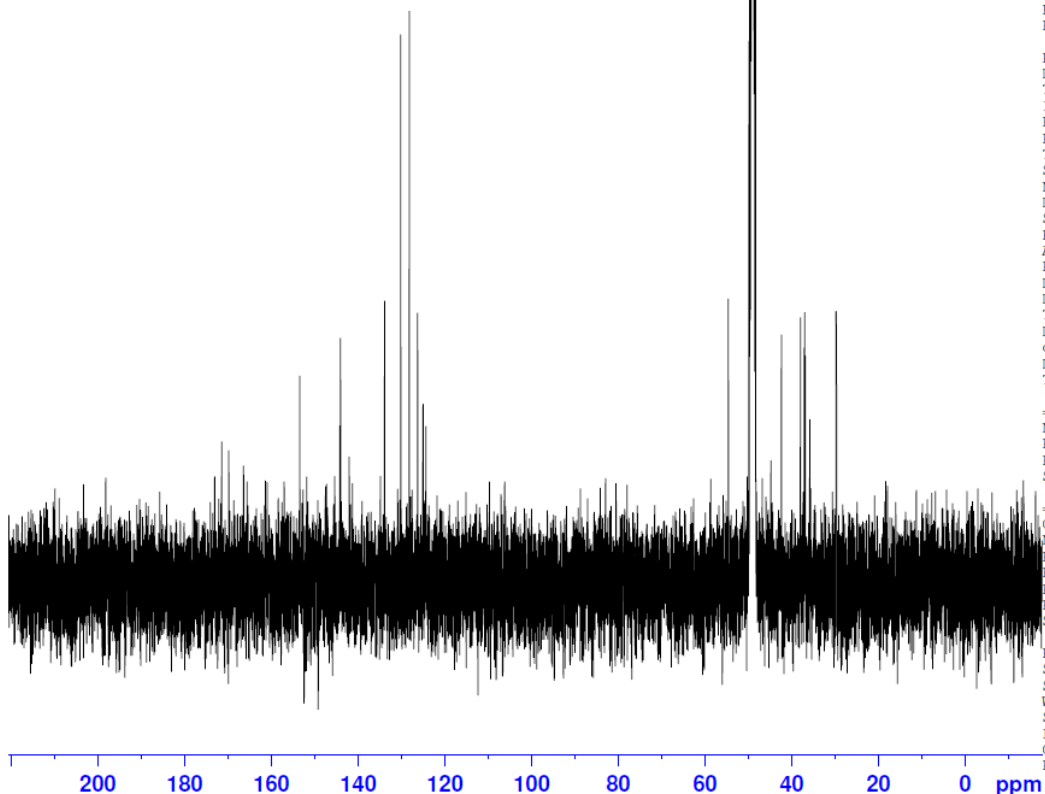

153.50  
144.23  
144.06  
133.91  
130.22  
128.19  
126.28  
125.05

54.60  
49.87  
49.73  
49.66  
49.52  
49.45  
49.30  
49.23  
49.02  
48.81  
48.59  
48.38  
42.35  
37.93  
37.13  
36.98  
36.84  
29.71

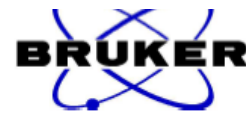

Current Data Parameters  
NAME aet9-61-MeOD  
EXPNO 12  
PROCNO 1

F2 - Acquisition Parameters  
Date\_ 20130914  
Time 9.50  
INSTRUM DPX400  
PROBHD 5 mm QNP 1H/13  
PULPROG deptq\_135  
TD 65536  
SOLVENT MeOD  
NS 512  
DS 4  
SWH 23980.814 Hz  
FIDRES 0.365918 Hz  
AQ 1.3664756 sec  
RG 11585.2  
DW 20.850 usec  
DE 6.00 usec  
TE 293.2 K  
CNST2 145.0000000  
D1 2.00000000 sec  
d2 0.00344828 sec  
d11 0.03000000 sec  
DELTA 0.00001146 sec

===== CHANNEL f1 =====  
NUC1 13C  
P1 9.00 usec  
P2 18.00 usec  
PL1 -2.60 dB  
SFO1 100.6228300 MHz

===== CHANNEL f2 =====  
CPDPRG2 waltz16  
NUC2 1H  
P3 10.00 usec  
P4 20.00 usec  
PCPD2 80.00 usec  
PL2 -1.50 dB  
PL12 17.50 dB  
SFO2 400.1316000 MHz

F2 - Processing parameters  
SI 32768  
SF 100.6126261 MHz  
WDW EM  
SSB 0  
LB 1.00 Hz  
GB 0  
PC 1.40

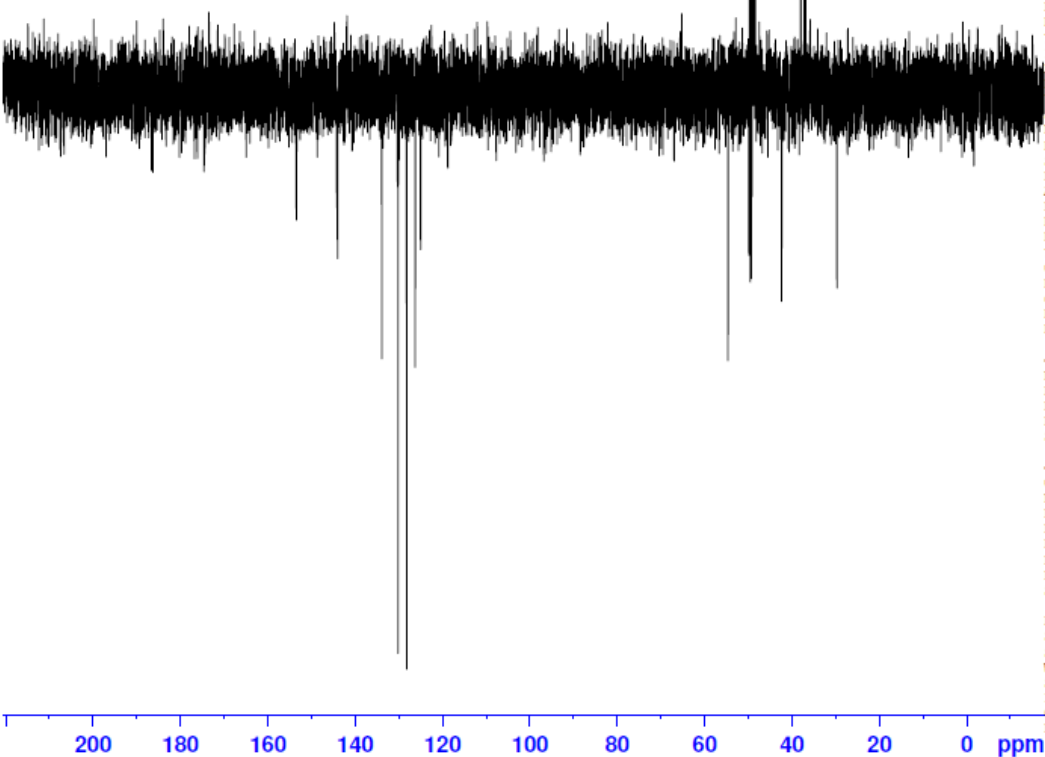

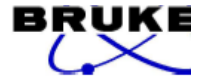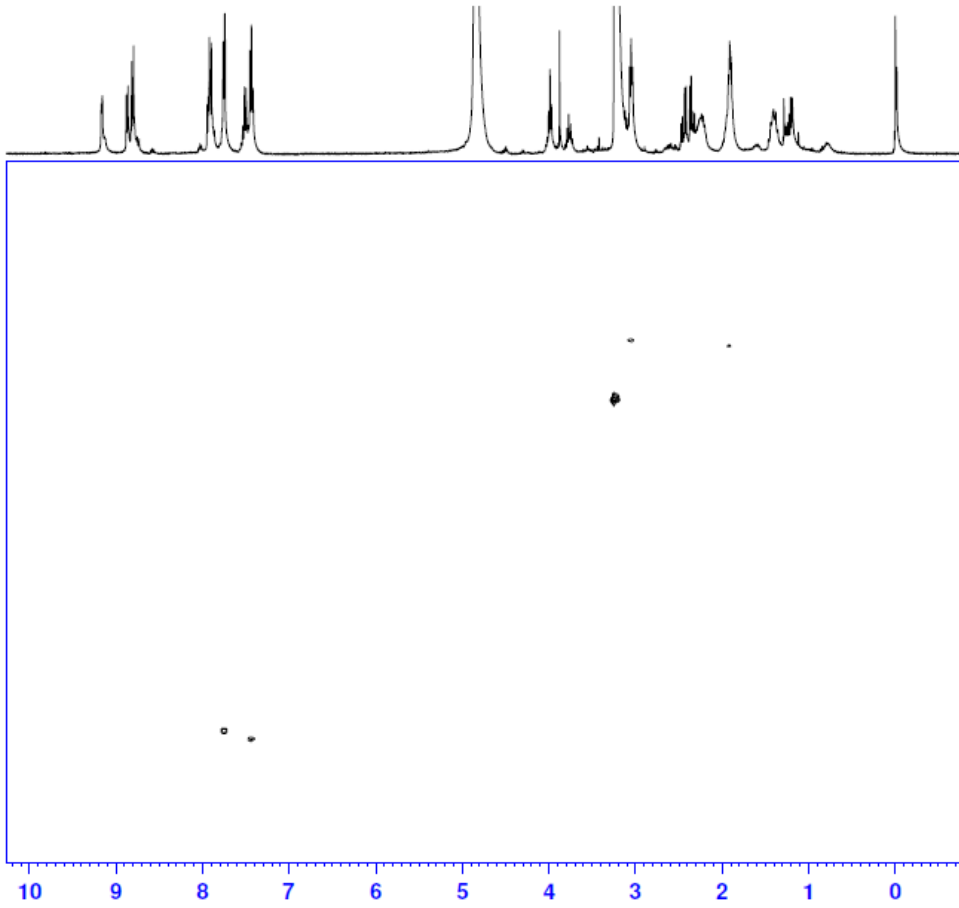

Current Data Parameters  
NAME me3-Ci-MeCO  
EXPNO 15  
PROCNO 1

F2 - Acquisition Parameters  
Date\_ 20130914  
Time 10.24  
INSTRUM spect  
PROBHD 5 mm QNP 1H/13  
PULPROG zgpg30  
TD 1024  
SOLVENT MeCO  
NS 4  
DS 16  
SWH 4432.624 Hz  
FIDRES 4.328734 Hz  
AQ 0.1155572 sec  
RG 7398.2  
SM 112.800  
DE 6.00 usec  
TE 292.2 K  
CHST2 145.0000000  
d0 0.00000300 usec  
d1 1.5136397 usec  
d2 0.00344828 usec  
d12 0.00002000 usec  
d13 0.00000400 usec  
d16 0.00020000 usec  
DELTA1 0.00224258 usec  
IN0 0.00000300 usec

----- CHANNEL F1 -----  
NUC1 13C  
P1 10.00 usec  
PL 0.00 dB  
PL1 -1.50 dB  
SFO1 400.1319389 MHz

----- CHANNEL F2 -----  
CPDPRG2 9MTE  
NUC2 13C  
P2 8.00 usec  
PL2 74.00 usec  
PL12 -3.00 dB  
PL13 18.00 dB  
SFO2 100.6203140 MHz

----- GRADIENT CHANNEL -----  
GPMAM1 SINE.100  
GPMAM2 SINE.100  
GPMAM3 SINE.100  
GPE1 50.00 %  
GPE2 30.00 %  
GPE3 40.10 %  
PLG 1000.00 usec

F1 - Acquisition parameters  
MD0 2  
TD 128  
SFO1 100.6203 MHz  
FIDRES 130.208328 Hz  
SM 165.639 ppm  
P0MODE QF

F2 - Processing parameters  
SI 1024  
SF 400.1300474 MHz  
WDW QSINE  
SSB 2  
LB 0.00 Hz  
GB 0  
PC 1.40

F1 - Processing parameters  
SI 1024  
MC2 QF  
SF 100.627650 MHz  
WDW QSINE  
SSB 2  
LB 0.00 Hz  
GB 0

tert-butyl (S)-4-oxo-3-(phenylsulfonamido)-4-(((1*r*\*,3*R*\*)-3-(2-(5,6,7,8-tetrahydro-1,8-naphthyridin-2-

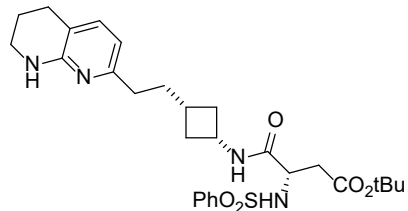

yl)ethyl)cyclobutyl)amino)butanoate [Compound 39]

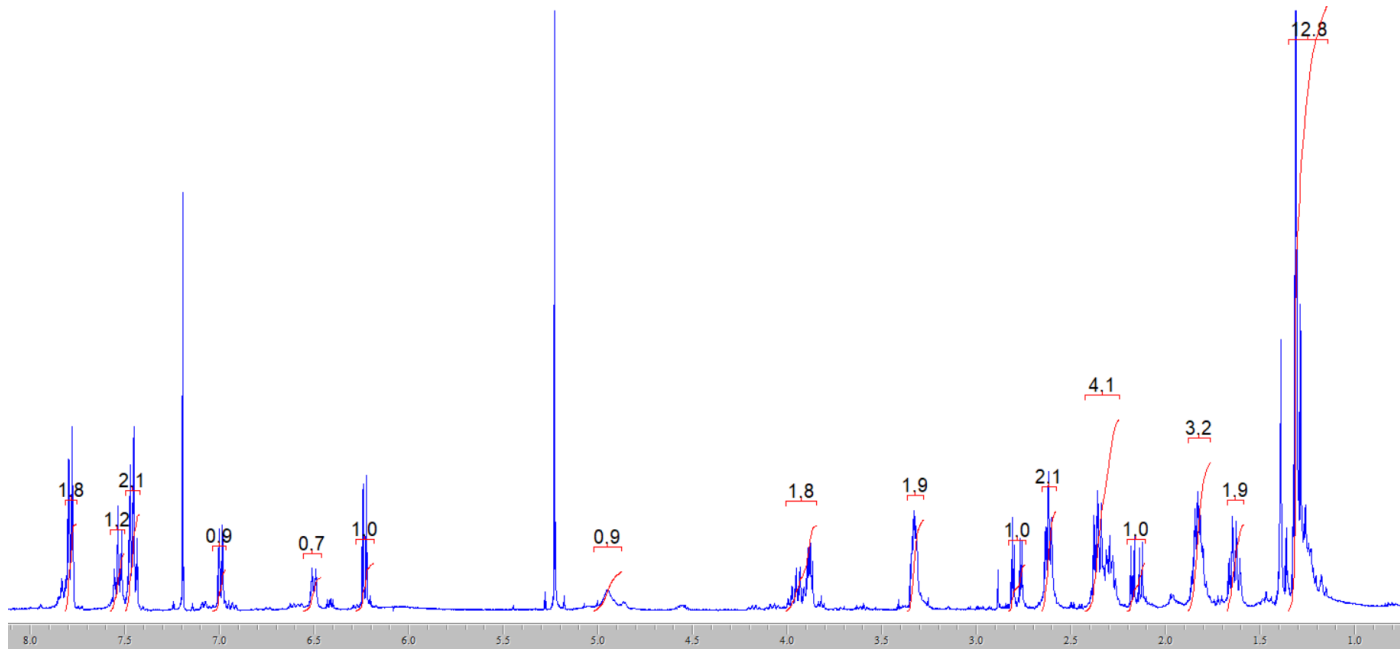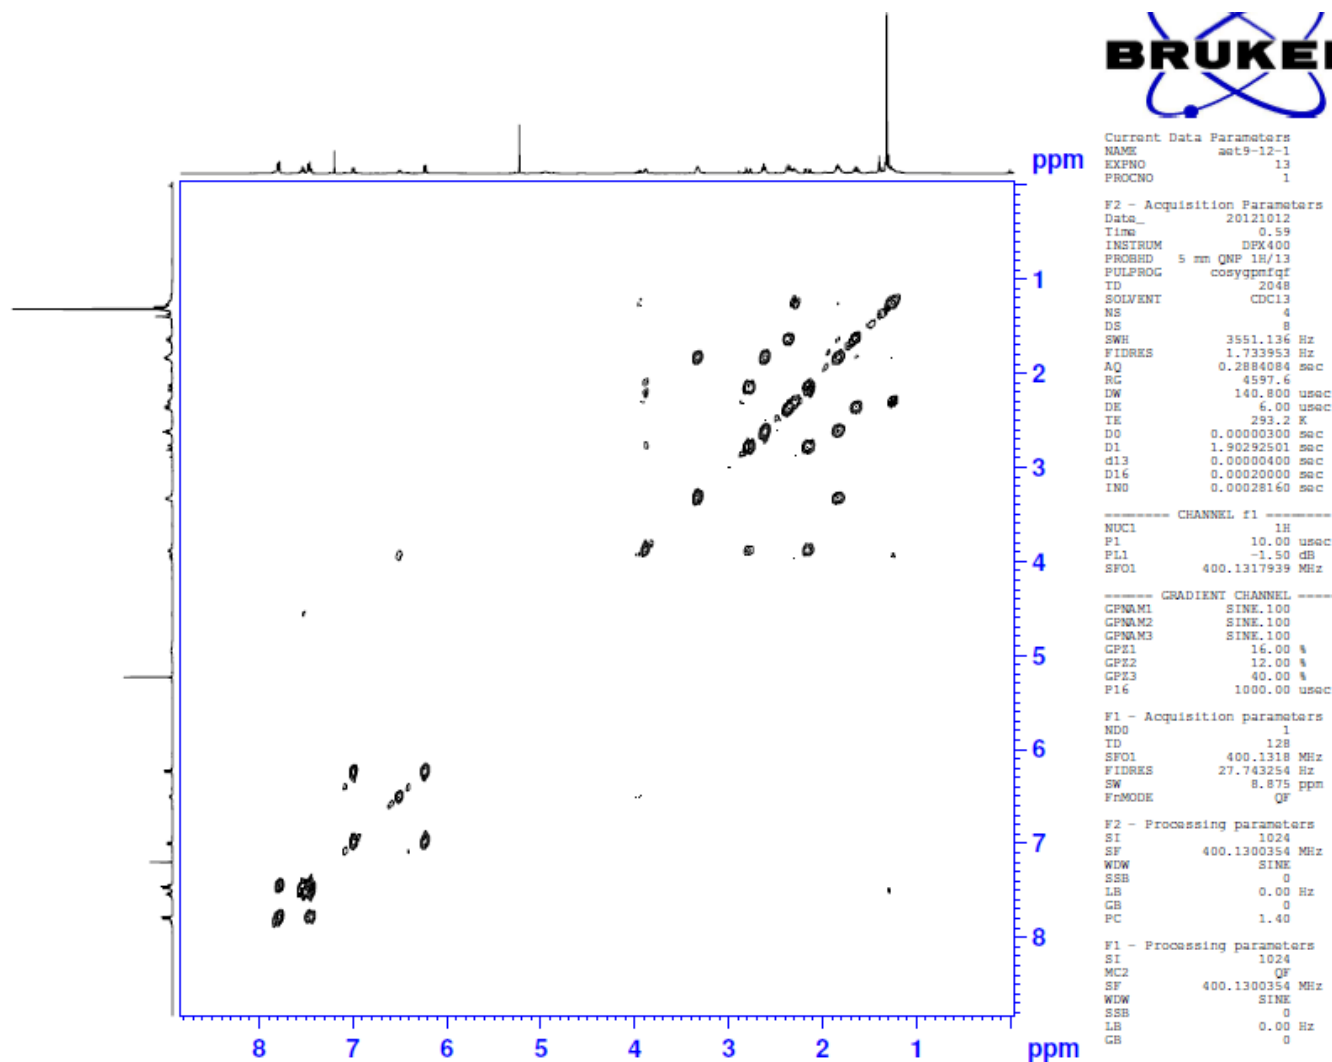

**BRUKER**

Current Data Parameters  
NAME set9-12-1  
EXPNO 13  
PROCNO 1

F2 - Acquisition Parameters  
Date\_ 20121012  
Time 0.59  
INSTRUM DPX400  
PROBHD 5 mm QNP 1H/13  
PULPROG cosygpcmgf  
TD 2048  
SOLVENT CDCl3  
NS 4  
DS 8  
SWH 3551.136 Hz  
FIDRES 1.733953 Hz  
AQ 0.284084 sec  
RG 4597.6  
DW 140.800 usec  
DE 6.00 usec  
TE 293.2 K  
D0 0.00000300 sec  
D1 1.90292501 sec  
d13 0.00000400 sec  
D16 0.00020000 sec  
IN0 0.00028160 sec

----- CHANNEL f1 -----  
NUC1 1H  
P1 10.00 usec  
PL1 -1.50 dB  
SF01 400.1317939 MHz

----- GRADIENT CHANNEL -----  
GPNM1 SINE.100  
GPNM2 SINE.100  
GPNM3 SINE.100  
GPE1 16.00 %  
GPE2 12.00 %  
GPE3 40.00 %  
P16 1000.00 usec

F1 - Acquisition parameters  
ND0 1  
TD 128  
SF01 400.1318 MHz  
FIDRES 27.743254 Hz  
SW 8.875 ppm  
FMODE QF

F2 - Processing parameters  
SI 1024  
SF 400.1300354 MHz  
WDW SINE  
SSB 0  
LB 0.00 Hz  
GB 0  
PC 1.40

F1 - Processing parameters  
SI 1024  
MC2 QF  
SF 400.1300354 MHz  
WDW SINE  
SSB 0  
LB 0.00 Hz  
GB 0



aet9-12-1

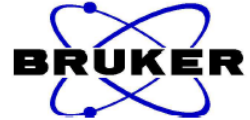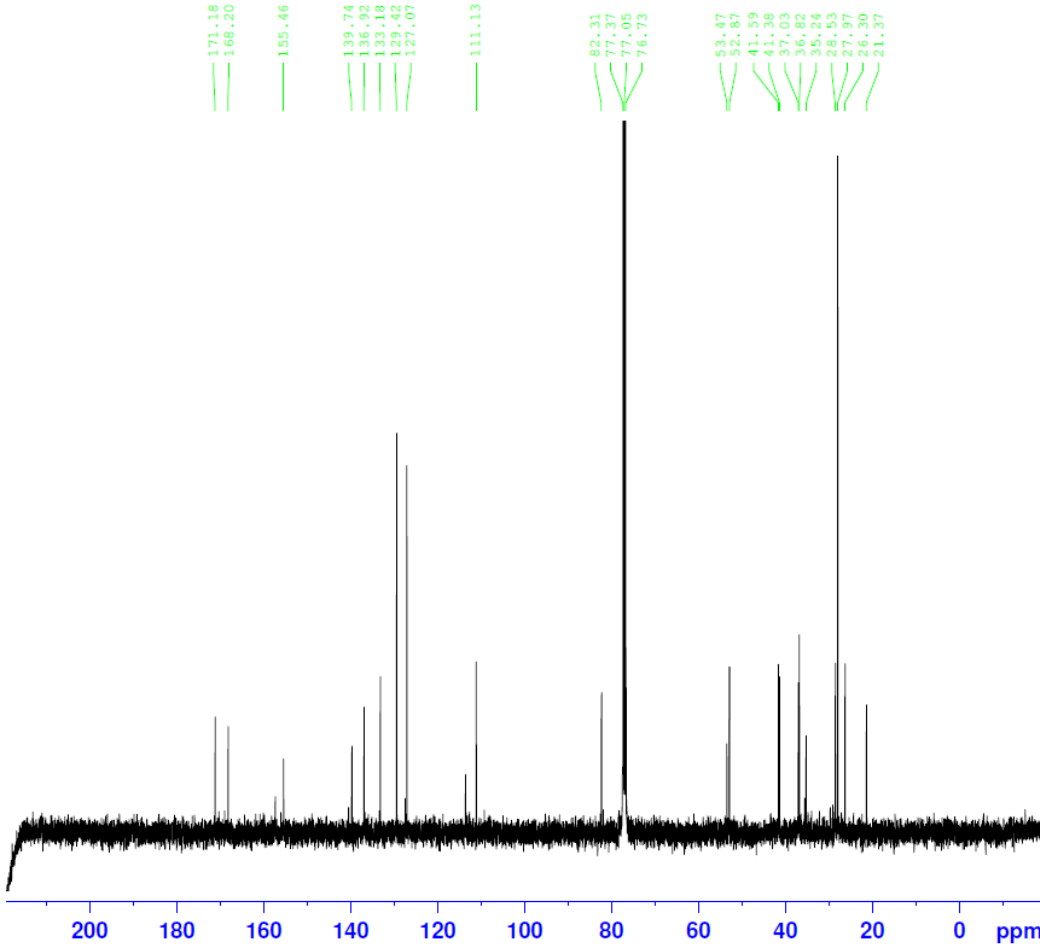

Current Data Parameters  
 NAME aet9-12-1  
 EXPNO 11  
 PROCNO 1

F2 - Acquisition Parameters  
 Date\_ 20121012  
 Time 0.28  
 INSTRUM DPX400  
 PROBHD 5 mm QNP 1H/13  
 PULPROG zgpg30  
 TD 65536  
 SOLVENT CDCl3  
 NS 1024  
 DS 4  
 SWH 23980.814 Hz  
 FIDRES 0.365918 Hz  
 AQ 1.3664756 sec  
 RG 812.7  
 DW 20.850 usec  
 DE 6.00 usec  
 TE 293.2 K  
 D1 2.00000000 sec  
 d11 0.03000000 sec  
 DELTA 1.89999999 sec  
 TD0 1

===== CHANNEL f1 =====  
 NUC1 13C  
 P1 8.50 usec  
 PL1 -2.60 dB  
 SFO1 100.6228298 MHz

===== CHANNEL f2 =====  
 CPDPRG2 waltz16  
 NUC2 1H  
 PCPD2 80.00 usec  
 PL2 -1.50 dB  
 PL12 17.50 dB  
 PL13 17.50 dB  
 SFO2 400.1316005 MHz

F2 - Processing parameters  
 SI 32768  
 SF 100.6127690 MHz  
 WDW EM  
 SSB 0  
 LB 1.00 Hz  
 GB 0  
 PC 1.40

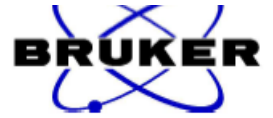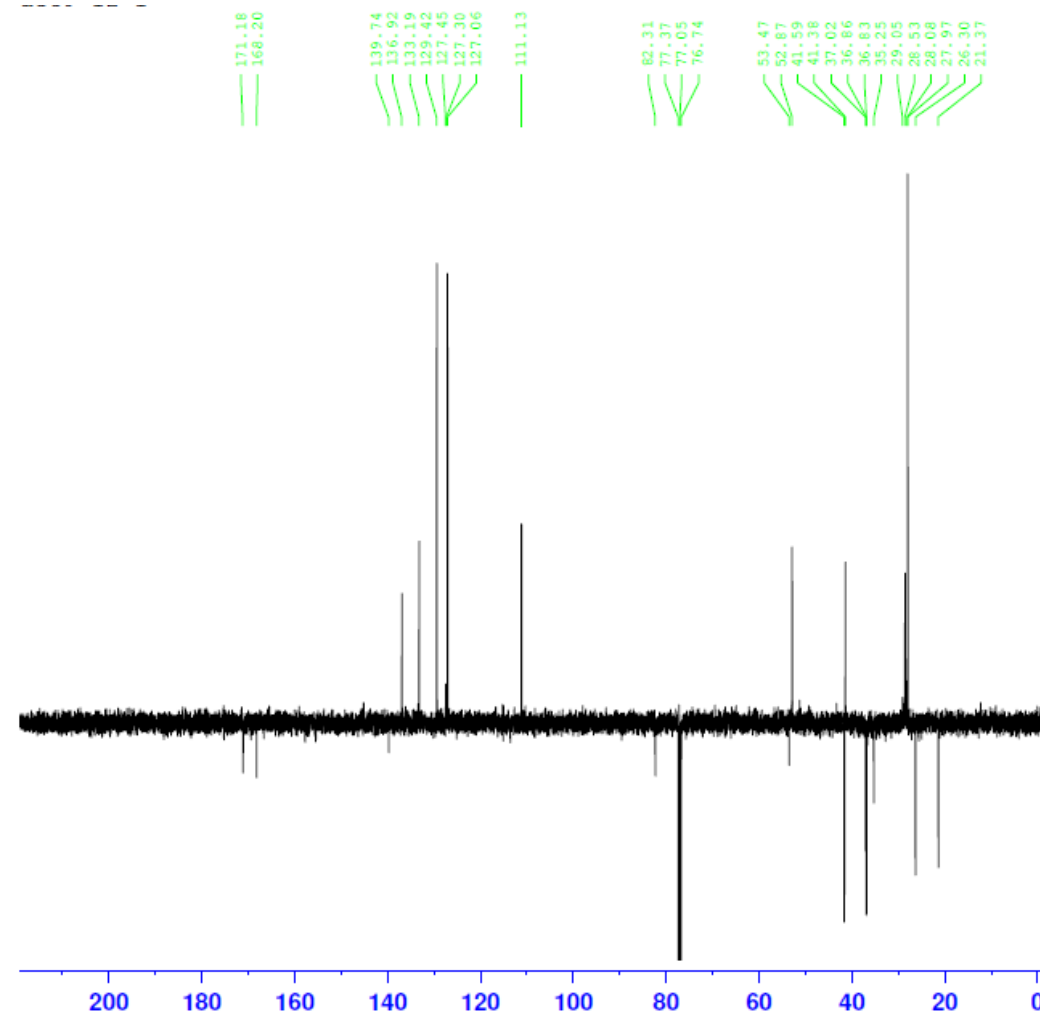

Current Data Parameters  
 NAME aet9-12-1  
 EXPNO 12  
 PROCNO 1

F2 - Acquisition Parameters  
 Date\_ 20121012  
 Time 0.59  
 INSTRUM DPX400  
 PROBHD 5 mm QNP 1H/13  
 PULPROG deptg\_135  
 TD 65536  
 SOLVENT CDCl3  
 NS 512  
 DS 4  
 SWH 23980.814 Hz  
 FIDRES 0.365918 Hz  
 AQ 1.3664756 sec  
 RG 18390.4  
 DW 20.850 usec  
 DE 6.00 usec  
 TE 292.2 K  
 CNST2 145.0000000  
 D1 2.00000000 sec  
 d2 0.00344828 sec  
 D11 0.03000000 sec  
 DELTA 0.00001082 sec

----- CHANNEL f1 -----  
 NUC1 13C  
 P1 8.50 usec  
 P2 17.00 usec  
 PL1 -2.60 dB  
 SFO1 100.6228300 MHz

----- CHANNEL f2 -----  
 CPDPRG2 waltz16  
 NUC2 1H  
 F3 10.00 usec  
 F4 20.00 usec  
 PCPD2 80.00 usec  
 PL2 -1.50 dB  
 PL12 17.50 dB  
 SFO2 400.1316000 MHz

F2 - Processing parameters  
 SI 32768  
 SF 100.6127690 MHz  
 WDW EM  
 SSB 0  
 LB 1.00 Hz  
 GB 0  
 PC 1.40

Current Data Parameters  
 NAME: smt9-12-1  
 EXPNO: 14  
 PROCNO: 1

F2 - Acquisition Parameters  
 Date\_: 20121012  
 Time: 1.20

INSTRUM: DPX400  
 PROBHD: 5 mm QNP 1H/13  
 PULPROG: hmgpporf  
 TD: 1024  
 SOLVENT: CDCl3  
 NS: 4  
 DS: 16  
 SWH: 3551.134 Hz  
 FIDRES: 3.467907 Hz  
 AQ: 0.1442292 sec  
 RG: 5792.0  
 SW: 140.800 us/c  
 DE: 6.00 us/c  
 TE: 292.2 K  
 CHST2: 145.000000 sec  
 d0: 0.0000300 sec  
 d1: 1.48259199 sec  
 d2: 0.00244628 sec  
 d12: 0.00020000 sec  
 d13: 0.00004000 sec  
 d16: 0.00020000 sec  
 DELTA1: 0.00224428 sec  
 IN0: 0.00003000 sec

CHANNEL F1  
 NUC1: 1H  
 P1: 10.00 us/c  
 P2: 20.00 us/c  
 PL1: -1.50 dB  
 SFO1: 400.1317939 MHz

CHANNEL F2  
 CPDPRG2: gmsf2  
 NUC2: 13C  
 P3: 8.00 us/c  
 PCPD2: 74.00 us/c  
 PL2: -3.00 dB  
 PL12: 18.00 dB  
 SFO2: 100.6203140 MHz

GRADIENT CHANNEL  
 GPARAM1: SINE.100  
 GPARAM2: SINE.100  
 GPARAM3: SINE.100  
 GPX1: 50.00 %  
 GPX2: 30.00 %  
 GPX3: 40.10 %  
 P1G: 1000.00 us/c

F1 - Acquisition parameters  
 MD0: 2  
 TD: 128  
 SFO1: 100.6203 MHz  
 FIDRES: 130.208328 Hz  
 SW: 165.639 ppm  
 FWHMDE: 0

F2 - Processing parameters  
 SI: 1024  
 SF: 400.1300354 MHz  
 WDW: QSIWV  
 SSB: 2  
 LB: 0.00 Hz  
 GB: 0  
 PC: 1.40

F1 - Processing parameters  
 SI: 1024  
 WC2: 0  
 SF: 100.6127690 MHz  
 WDW: QSIWV  
 SSB: 2  
 LB: 0.00 Hz  
 GB: 0

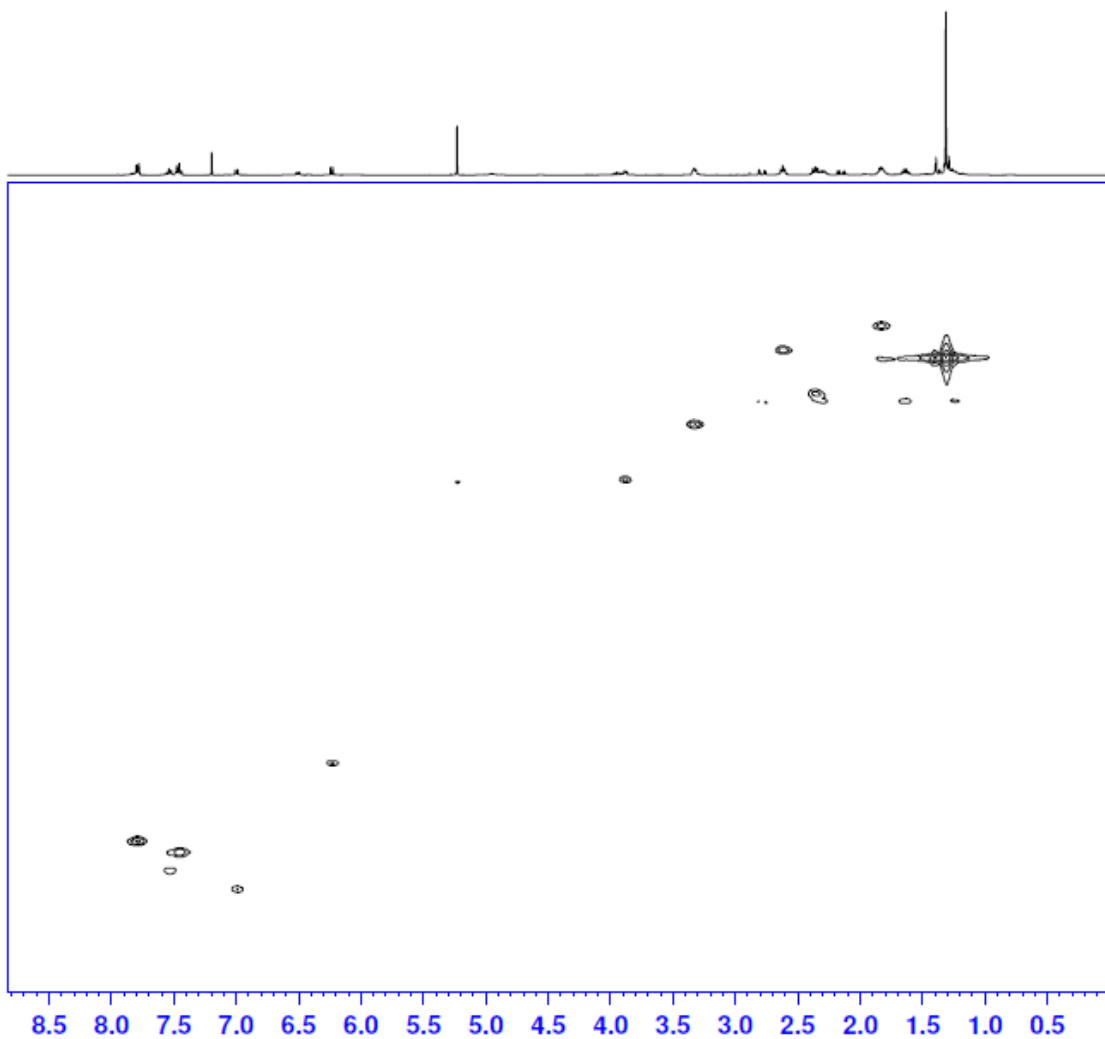

**(S)-4-oxo-3-(phenylsulfonamido)-4-(((1*r*\*,3*R*\*)-3-(2-(5,6,7,8-tetrahydro-1,8-naphthyridin-2-**

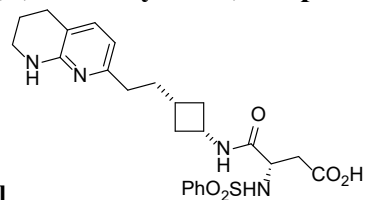

**yl)ethyl)cyclobutyl)amino)butanoic acid [Compound 40]**

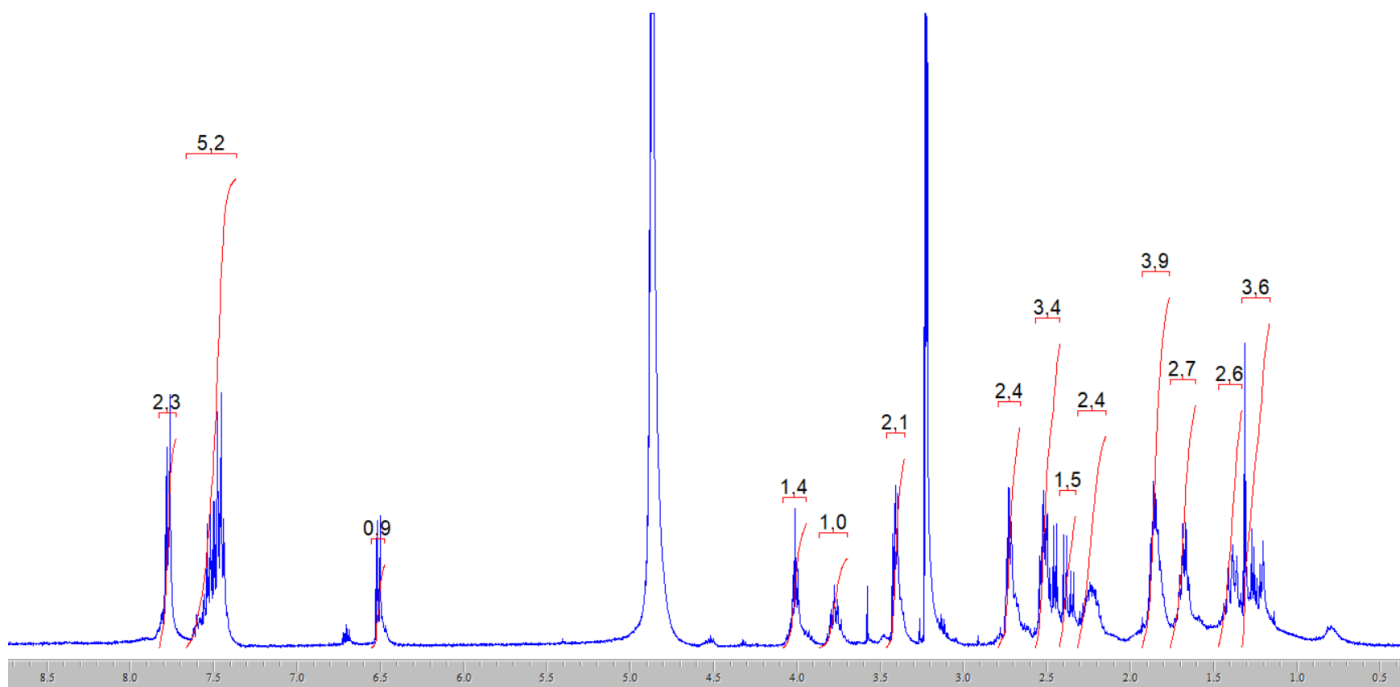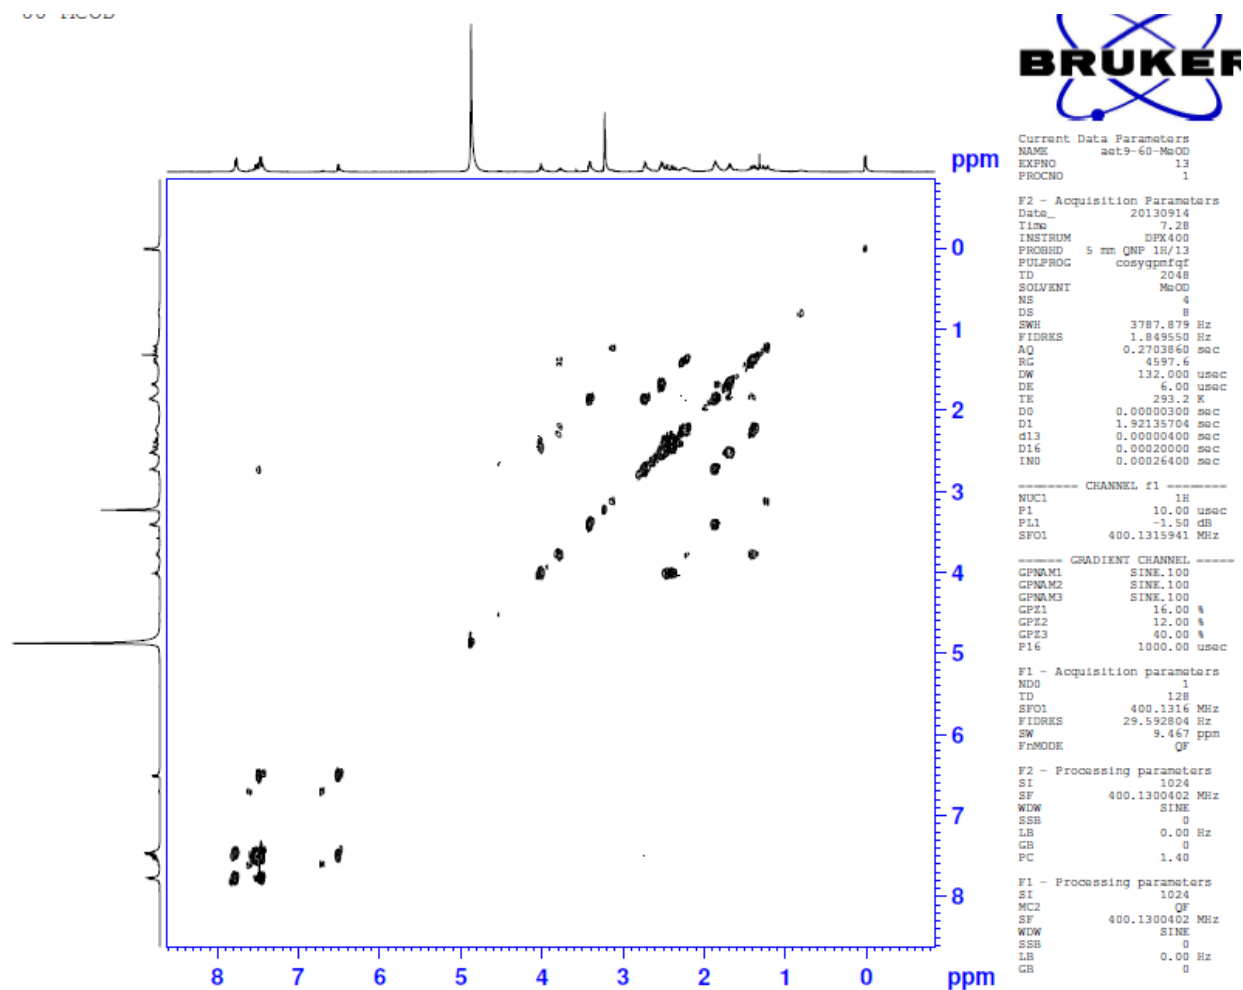

Current Data Parameters  
 NAME act9-60-MeOD  
 EXPNO 13  
 PROCNO 1

F2 - Acquisition Parameters  
 Date\_ 20130914  
 Time 7.28  
 INSTRUM DFX400  
 PROBRD 5 mm QNP 1H/13  
 PULPROG coesyppmgf  
 TD 2048  
 SOLVENT MeOD  
 NS 4  
 DS 8  
 SWH 3787.879 Hz  
 FIDRES 1.849550 Hz  
 AQ 0.2703860 sec  
 RG 4597.6  
 DW 132.000 usec  
 DE 6.00 usec  
 TE 293.2 K  
 D0 0.00000300 sec  
 D1 1.92135704 sec  
 d12 0.0000400 sec  
 D16 0.0002000 sec  
 IN0 0.00026400 sec

----- CHANNEL f1 -----  
 NUC1 1H  
 P1 10.00 usec  
 PL1 -1.50 dB  
 SFO1 400.1315941 MHz

----- GRADIENT CHANNEL -----  
 GPNAM1 SINE.100  
 GPNAM2 SINE.100  
 GPNAM3 SINE.100  
 GPE1 16.00 %  
 GPE2 12.00 %  
 GPE3 40.00 %  
 P16 1000.00 usec

F1 - Acquisition parameters  
 NDO 1  
 TD 128  
 SFO1 400.1316 MHz  
 FIDRES 29.592804 Hz  
 SW 9.467 ppm  
 FhMODE QF

F2 - Processing parameters  
 SI 1024  
 SF 400.1300402 MHz  
 WDW SINE  
 SSB 0  
 LB 0.00 Hz  
 GB 0  
 PC 1.40

F1 - Processing parameters  
 SI 1024  
 MC2 QF  
 SF 400.1300402 MHz  
 WDW SINE  
 SSB 0  
 LB 0.00 Hz  
 GB 0

aet9-60-MeOD

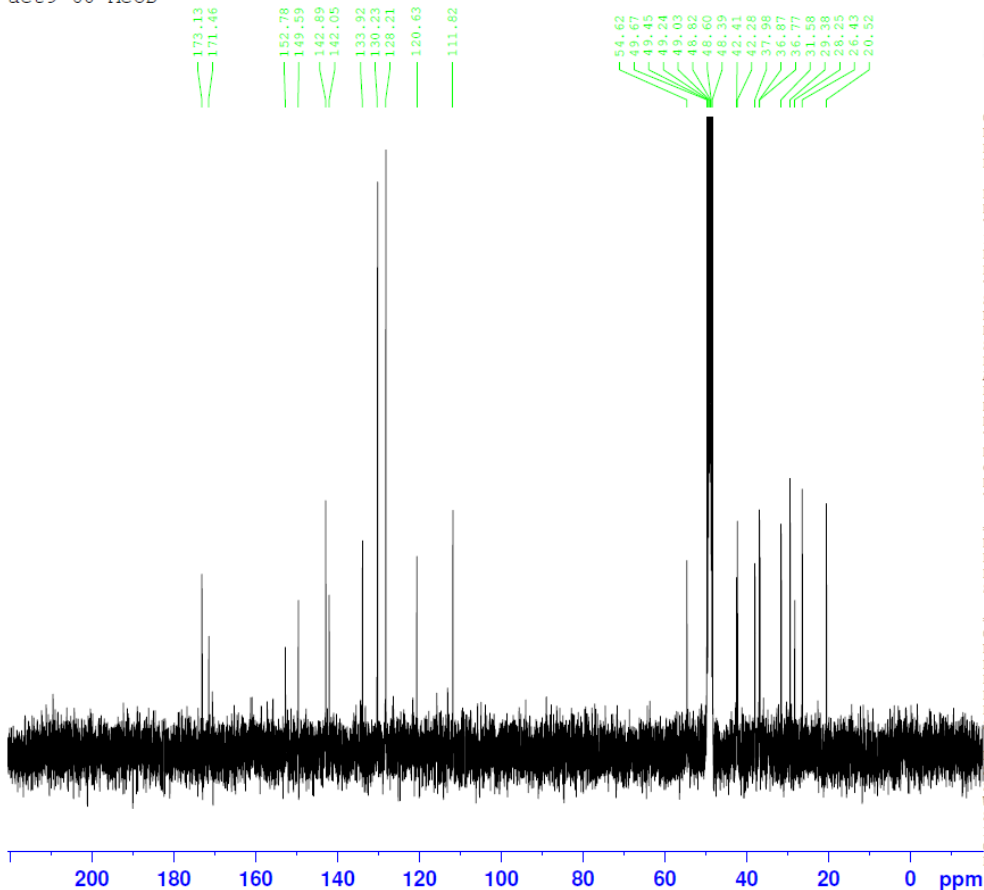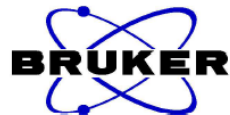

Current Data Parameters  
 NAME aet9-60-MeOD  
 EXPNO 11  
 PROCNO 1

F2 - Acquisition Parameters  
 Date\_ 20130914  
 Time 6.57  
 INSTRUM DPX400  
 PROBHD 5 mm QNP 1H/13  
 PULPROG zgpg30  
 TD 65536  
 SOLVENT MeOD  
 NS 1024  
 DS 4  
 SWH 23980.814 Hz  
 FIDRES 0.365918 Hz  
 AQ 1.3664756 sec  
 RG 2580.3  
 DW 20.850 usec  
 DE 6.00 usec  
 TE 293.2 K  
 D1 2.00000000 sec  
 d11 0.03000000 sec  
 DELTA 1.89999998 sec  
 TD0 1

===== CHANNEL f1 =====  
 NUC1 13C  
 P1 9.00 usec  
 PL1 -2.60 dB  
 SFO1 100.6228298 MHz

===== CHANNEL f2 =====  
 CPDPRG2 waltz16  
 NUC2 1H  
 PCPD2 80.00 usec  
 PL2 -1.50 dB  
 PL12 17.50 dB  
 PL13 17.50 dB  
 SFO2 400.1316005 MHz

F2 - Processing parameters  
 SI 32768  
 SF 100.6126261 MHz  
 WDW EM  
 SSB 0  
 LB 1.00 Hz  
 GB 0  
 PC 1.40

aet9-60-MeOD

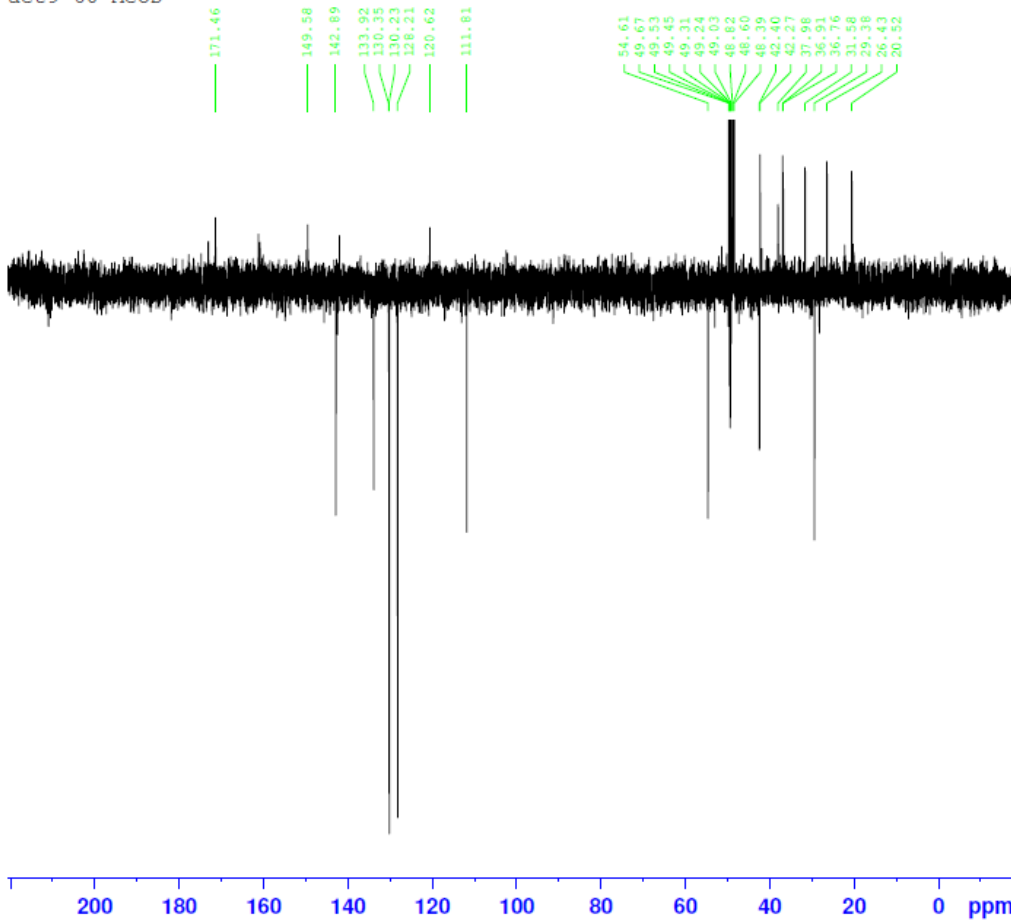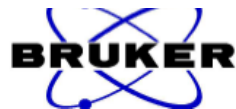

Current Data Parameters  
 NAME aet9-60-MeOD  
 EXPNO 12  
 PROCNO 1

F2 - Acquisition Parameters  
 Date\_ 20130914  
 Time 7.27  
 INSTRUM DPX400  
 PROBHD 5 mm QNP 1H/13  
 PULPROG deptc135  
 TD 65536  
 SOLVENT MeOD  
 NS 512  
 DS 4  
 SWH 23980.814 Hz  
 FIDRES 0.365918 Hz  
 AQ 1.3664756 sec  
 RG 11585.2  
 DW 20.850 usec  
 DE 6.00 usec  
 TE 293.2 K  
 CNST2 145.0000000 sec  
 D1 2.00000000 sec  
 d2 0.00344828 sec  
 D11 0.03000000 sec  
 DELTA 0.00001146 sec

===== CHANNEL f1 =====  
 NUC1 13C  
 P1 9.00 usec  
 P2 18.00 usec  
 PL1 -2.60 dB  
 SFO1 100.6228300 MHz

===== CHANNEL f2 =====  
 CPDPRG2 waltz16  
 NUC2 1H  
 P3 10.00 usec  
 P4 20.00 usec  
 PCPD2 80.00 usec  
 PL2 -1.50 dB  
 PL12 17.50 dB  
 SFO2 400.1316000 MHz

F2 - Processing parameters  
 SI 32768  
 SF 100.6126261 MHz  
 WDW EM  
 SSB 0  
 LB 1.00 Hz  
 GB 0  
 PC 1.40

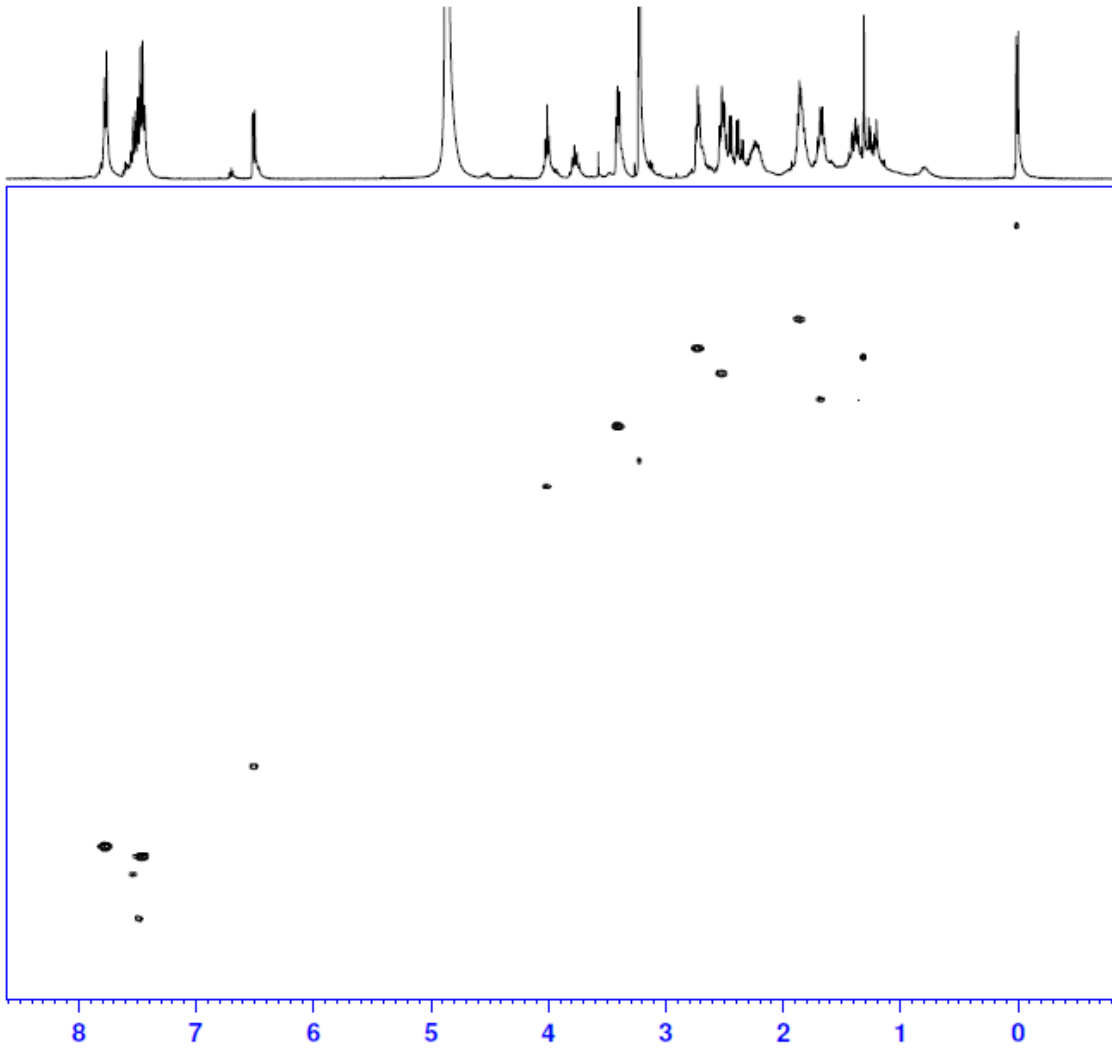

```

Current Data Parameters
NAME          acet9-CD-MeCD
EXPNO         14
PROCNO        1

F2 - Acquisition Parameters
Data_         20130914
Time          7.48
INSTRUM       spect
PROBHD        5 mm QNP 1H/13
PULPROG       zgpg30
TD             1024
SOLVENT       MeCD
NS             4
DS             16
SWH           3787.879 Hz
FIDRES        3.699100 Hz
AQ            0.1352180 sec
RG            5160.6
DW            132.000 usec
DE            6.00 usec
TE            292.2 K
CMST2         145.0000000
d0            0.00000300 usec
d1            1.49198906 usec
d2            0.00344828 usec
d12           0.00002000 usec
d13           0.00000400 usec
d16           0.00020000 usec
DELTA1        0.00222428 usec
IN0           0.00003000 usec

----- CHANNEL f1 -----
NUC1           1H
P1            10.00 usec
PL1           -1.50 dB
SFO1          400.1315941 MHz

----- CHANNEL f2 -----
CPDPRG2       gssp
NUC2           13C
P2            8.00 usec
PCPD2         74.00 usec
PL2           -3.00 dB
PL12          18.00 dB
SFO2          100.6203140 MHz

----- GRADIENT CHANNEL -----
GPNAM1        SINE.100
GPNAM2        SINE.100
GPNAM3        SINE.100
GPE1          50.00 %
GPE2          30.00 %
GPE3          40.10 %
PLG           1000.00 usec

F1 - Acquisition parameters
ND0            2
TD             128
SFO1          100.6203 MHz
FIDRES        130.208328 Hz
SW            165.639 ppm
F0MODE        QF

F2 - Processing parameters
SI             1024
SF            400.1300462 MHz
WDW           COSINE
SSB           0
LB            0.00 Hz
GB            0
PC            1.40

F1 - Processing parameters
SI             1024
MC2           QF
SF            100.6127690 MHz
WDW           COSINE
SSB           0
LB            0.00 Hz
GB            0
  
```

*tert*-butyl (6-(4-hydroxy-but-1-yn-1-yl)-pyridin-2-yl)(methyl)carbamate [Compound 46]

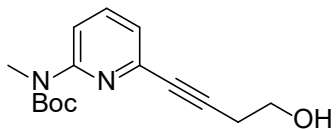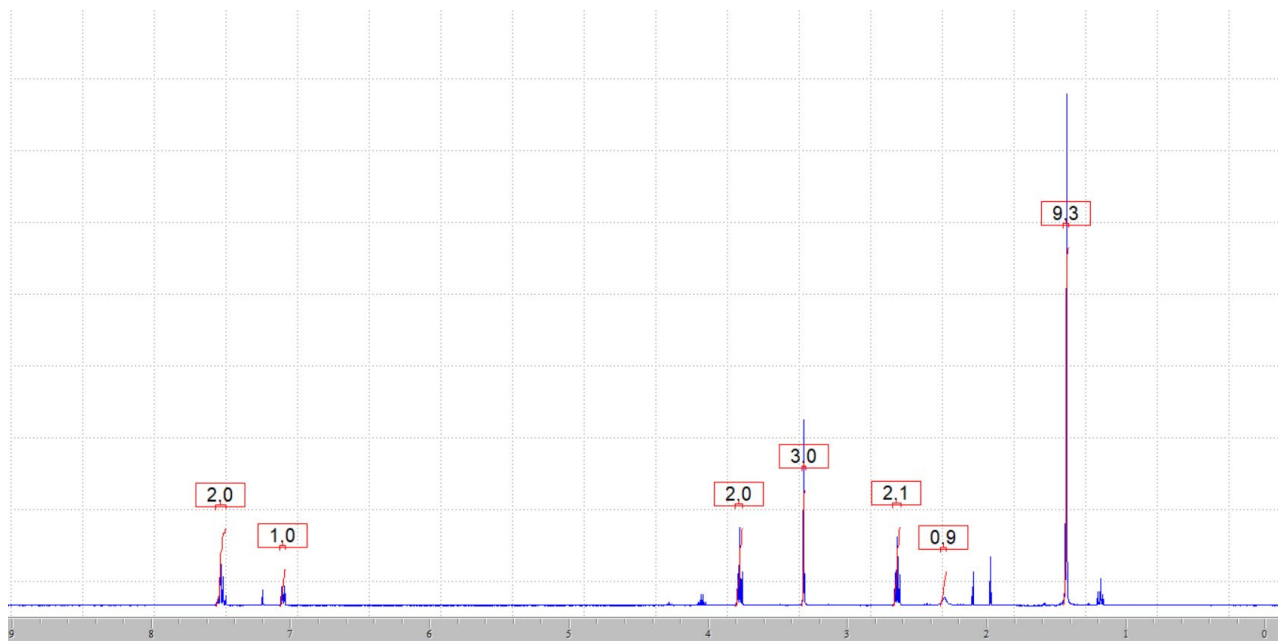

hms15-108-a

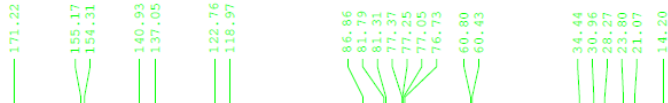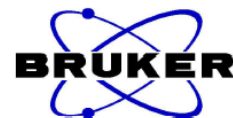

Current Data Parameters  
 NAME HMS151202  
 EXPNO 11  
 PROCNO 1

F2 - Acquisition Parameters  
 Date\_ 20151202  
 Time 21.24  
 INSTRUM DFX400  
 PROBHD 5 mm QNP 1H/13  
 PULPROG zgpg30  
 TD 65536  
 SOLVENT CDC13  
 NS 1024  
 DS 4  
 SWH 23980.814 Hz  
 FIDRES 0.365918 Hz  
 AQ 1.3664756 sec  
 RG 512  
 DW 20.850 usec  
 DE 6.00 usec  
 TE 294.2 K  
 D1 2.0000000 sec  
 d11 0.0300000 sec  
 DELTA 1.8999999 sec  
 TD0 1

===== CHANNEL f1 =====  
 NUC1 13C  
 P1 9.00 usec  
 PL1 -2.60 dB  
 SFO1 100.6228298 MHz

===== CHANNEL f2 =====  
 CPDPRG2 waltz16  
 NUC2 1H  
 PCPD2 80.00 usec  
 PL2 -1.50 dB  
 PL12 17.50 dB  
 PL13 17.50 dB  
 SFO2 400.1316005 MHz

F2 - Processing parameters  
 SI 32768  
 SF 100.6127690 MHz  
 WDW EM  
 SSB 0  
 LB 1.00 Hz  
 GB 0  
 PC 1.40

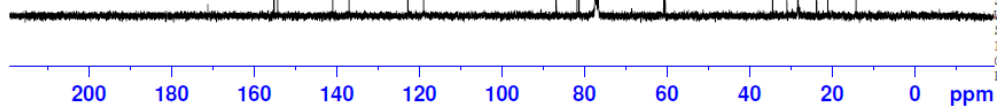

HMS151202

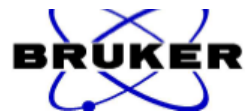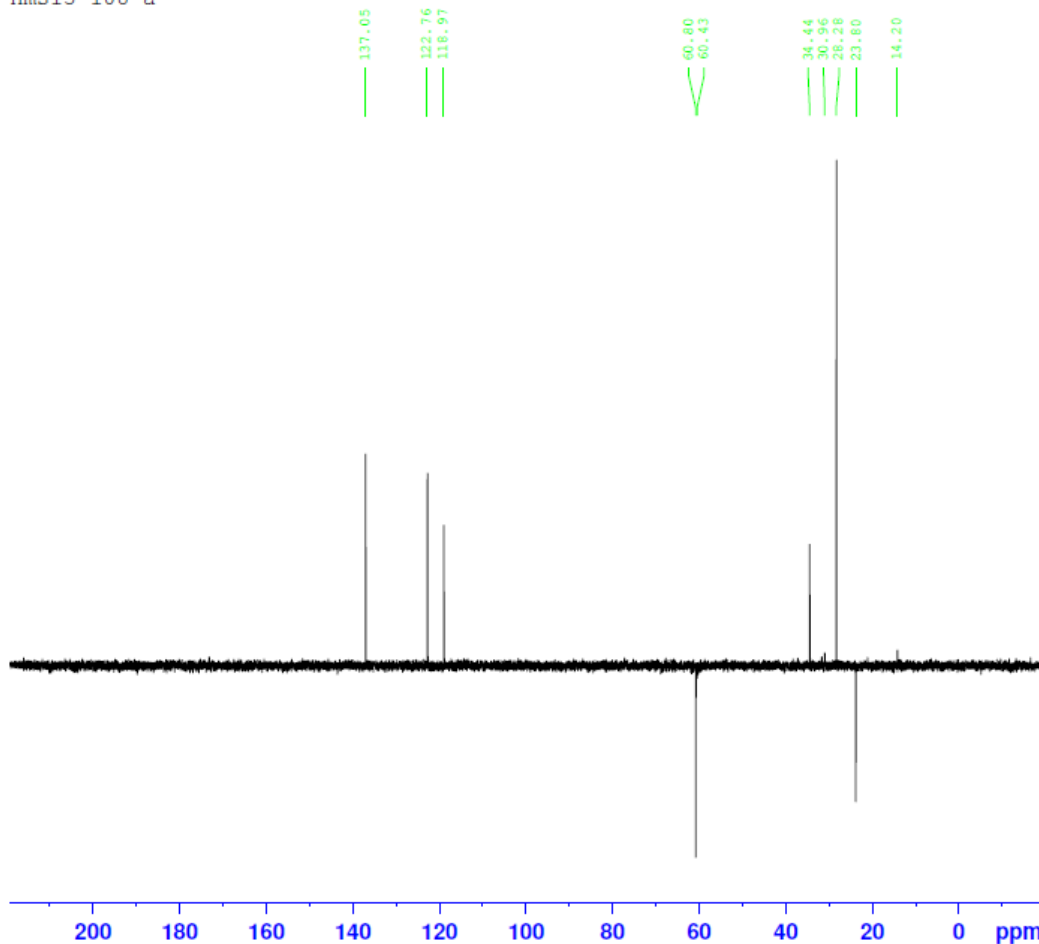

Current Data Parameters  
NAME HMS151202  
EXPNO 12  
PROCNO 1

F2 - Acquisition Parameters  
Date\_ 20151202  
Time 21.39  
INSTRUM DPX400  
PROBHD 5 mm QNP 1H/13  
PULPROG dept135  
TD 65536  
SOLVENT CDCl3  
NS 256  
DS 4  
SWH 23980.814 Hz  
FIDRES 0.365918 Hz  
AQ 1.3664756 sec  
RG 7298.2  
DW 20.850 usec  
DE 6.00 usec  
TE 294.2 K  
CNST2 145.0000000  
D1 2.0000000 sec  
d2 0.00344828 sec  
d12 0.00002000 sec  
DELTA 0.00001146 sec  
TD0 1

----- CHANNEL f1 -----  
NUC1 13C  
P1 9.00 usec  
p2 18.00 usec  
PL1 -2.60 dB  
SFO1 100.6228298 MHz

----- CHANNEL f2 -----  
CPDPRG2 waltz16  
NUC2 1H  
P3 10.00 usec  
P4 20.00 usec  
PCPD2 80.00 usec  
PL2 -1.50 dB  
PL12 17.50 dB  
SFO2 400.1316005 MHz

F2 - Processing parameters  
SI 32768  
SF 100.6127690 MHz  
WDW EM  
SSB 0  
LB 1.00 Hz  
GB 0  
PC 1.40

*tert*-butyl methyl(6-(4-oxobutyl)pyridin-2-yl)carbamate [Compound 43]

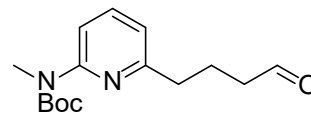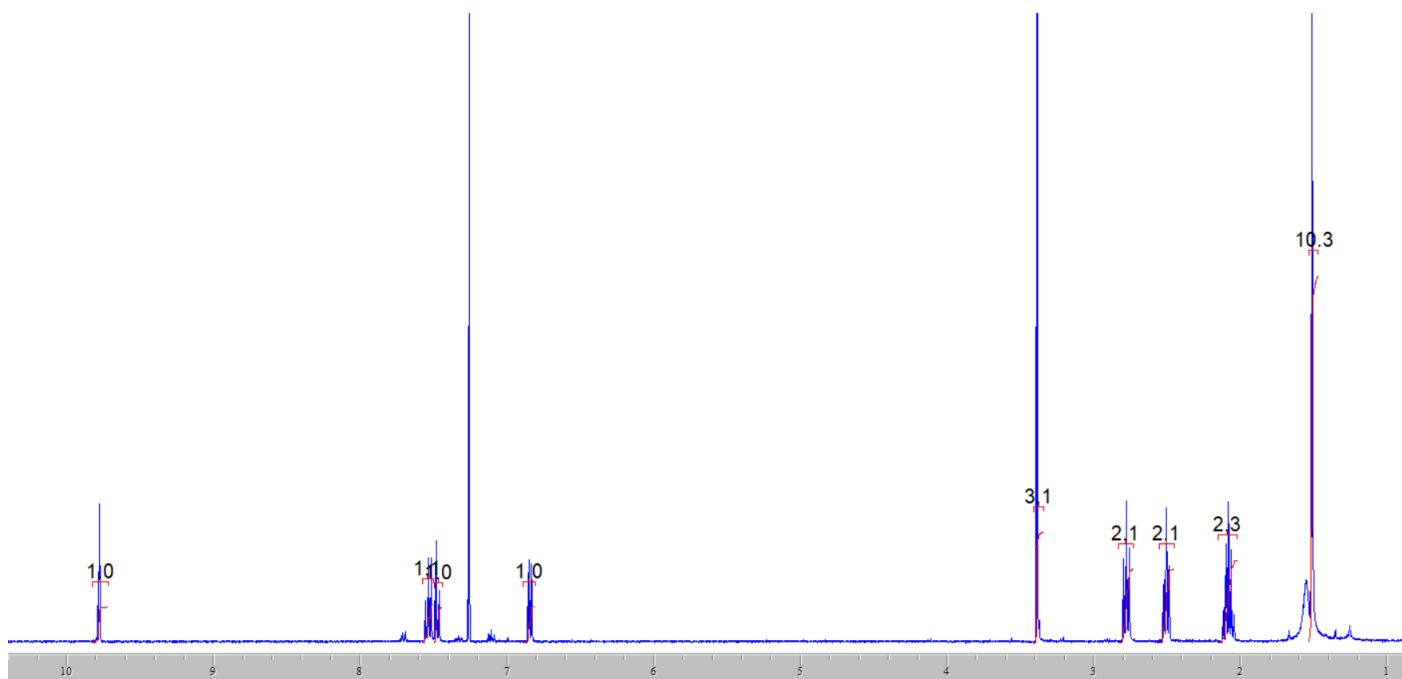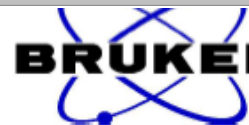

ppm

Current Data Parameters  
 NAME: aat7-9-f4\_6  
 EXPNO: 13  
 PROCNO: 1

F2 - Acquisition Parameters  
 Data\_: 20111015  
 Time: 0.41  
 INSTRUM: DFX400  
 PROBHD: 5 mm QNP 1H/13  
 PULPROG: cosygpsfgf  
 TD: 2048  
 SOLVENT: CDCl3  
 NS: 4  
 DS: 8  
 SWH: 4280.822 Hz  
 FIDRES: 2.090245 Hz  
 AQ: 0.2392564 sec  
 RG: 4096  
 LW: 116.800 usec  
 DE: 6.00 usec  
 TE: 298.2 K  
 D0: 0.00000300 sec  
 D1: 1.95207703 sec  
 d13: 0.00000400 sec  
 D16: 0.00020000 sec  
 IN0: 0.00023360 sec

----- CHANNEL f1 -----  
 NUC1: 1H  
 P1: 10.00 usec  
 PL1: -1.50 dB  
 SFO1: 400.1320448 MHz

----- GRADIENT CHANNEL -----  
 GPNAM1: SINE.100  
 GPNAM2: SINE.100  
 GPNAM3: SINE.100  
 GPE1: 16.00 %  
 GPE2: 12.00 %  
 GPE3: 40.00 %  
 P16: 1000.00 usec

F1 - Acquisition parameters  
 NDD: 1  
 TD: 128  
 SFO1: 400.132 MHz  
 FIDRES: 33.443920 Hz  
 SW: 10.699 ppm  
 FrMODE: QF

F2 - Processing parameters  
 SI: 1024  
 SF: 400.1300365 MHz  
 WDW: SINE  
 SSB: 0  
 LB: 0.00 Hz  
 GB: 0  
 PC: 1.40

F1 - Processing parameters  
 SI: 1024  
 MC2: QF  
 SF: 400.1300365 MHz  
 WDW: SINE  
 SSB: 0  
 LB: 0.00 Hz  
 GB: 0

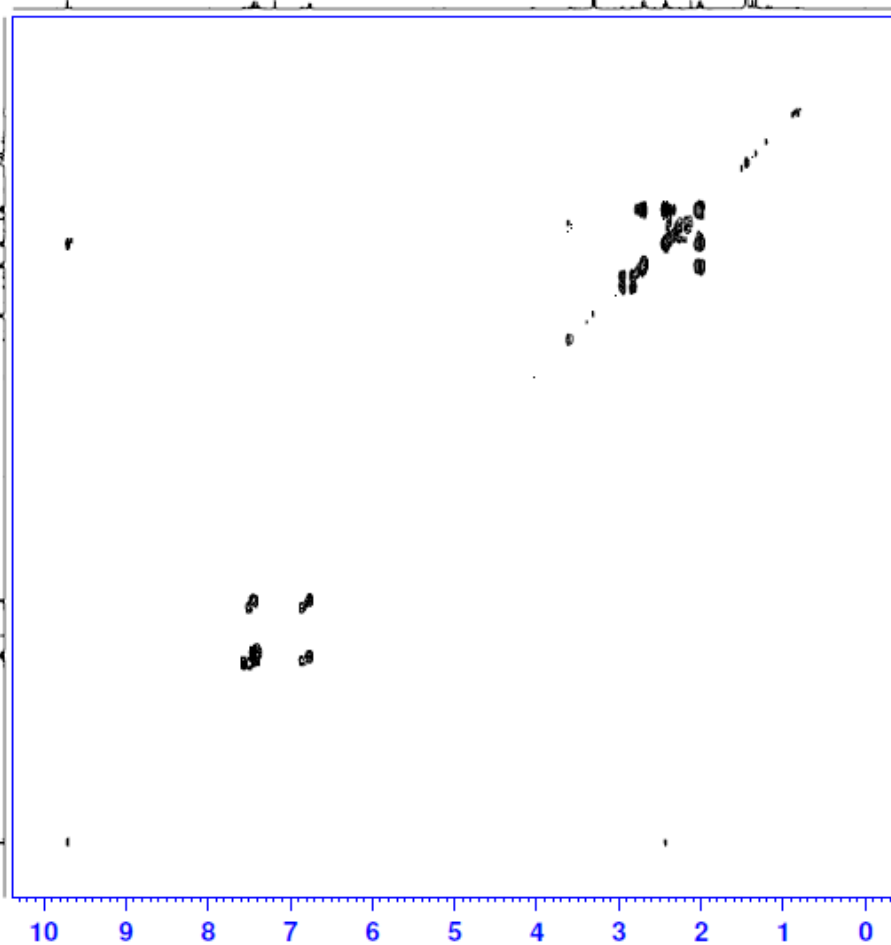



aet7-9-f4,6

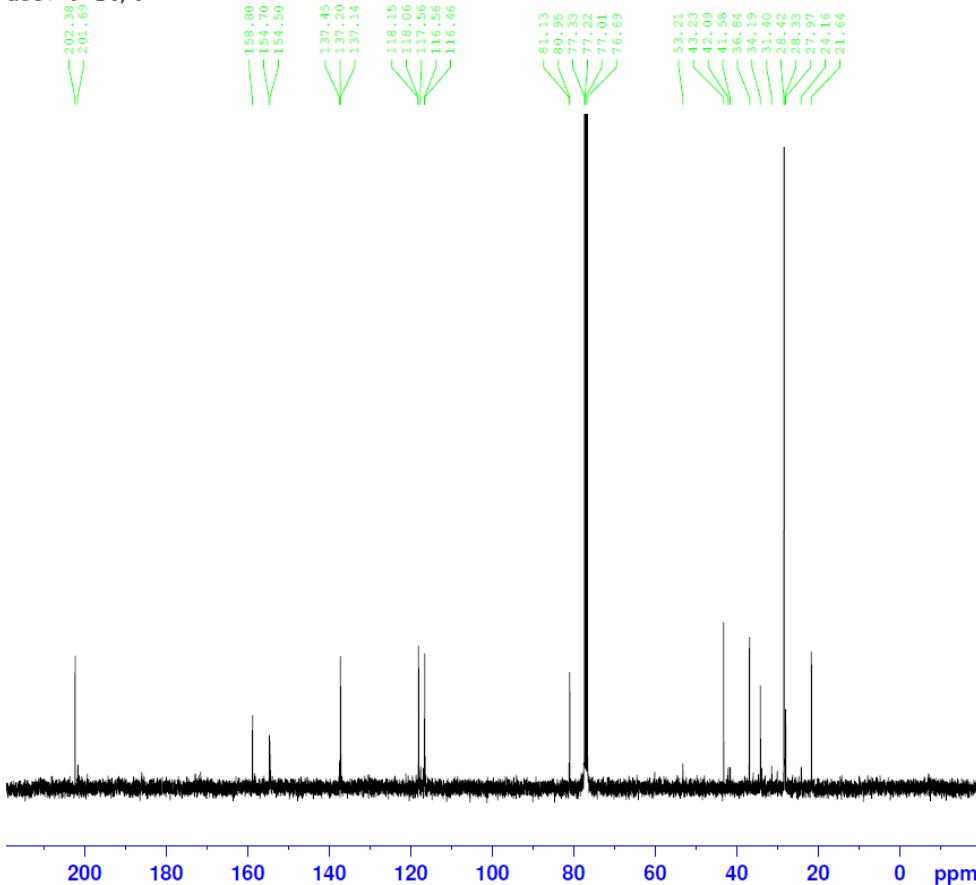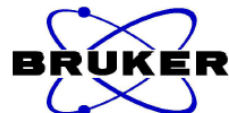

Current Data Parameters  
 NAME aet7-9-f4,6  
 EXPNO 11  
 PROCNO 1

F2 - Acquisition Parameters  
 Date\_ 20111015  
 Time 0.10  
 INSTRUM DPX400  
 PROBHD 5 mm QNP 1H/13  
 PULPROG zgpg30  
 TD 65536  
 SOLVENT CDCl3  
 NS 1024  
 DS 4  
 SWH 23980.814 Hz  
 FIDRES 0.365918 Hz  
 AQ 1.3664756 sec  
 RG 1448.2  
 DW 20.850 usec  
 DE 6.00 usec  
 TE 298.2 K  
 D1 2.00000000 sec  
 d11 0.03000000 sec  
 DELTA 1.89999998 sec  
 TD0 1

===== CHANNEL f1 =====  
 NUC1 13C  
 P1 8.00 usec  
 PL1 -2.60 dB  
 SFO1 100.6228298 MHz  
 ===== CHANNEL f2 =====  
 CPDPRG2 waltz16  
 NUC2 1H  
 PCPD2 80.00 usec  
 PL2 -1.50 dB  
 PL12 17.50 dB  
 PL13 17.50 dB  
 SFO2 400.1316005 MHz

F2 - Processing parameters  
 SI 32768  
 SF 100.6127690 MHz  
 WDW EM  
 SSB 0  
 LB 1.00 Hz  
 GB 0  
 PC 1.40

aet7-9-f4,6

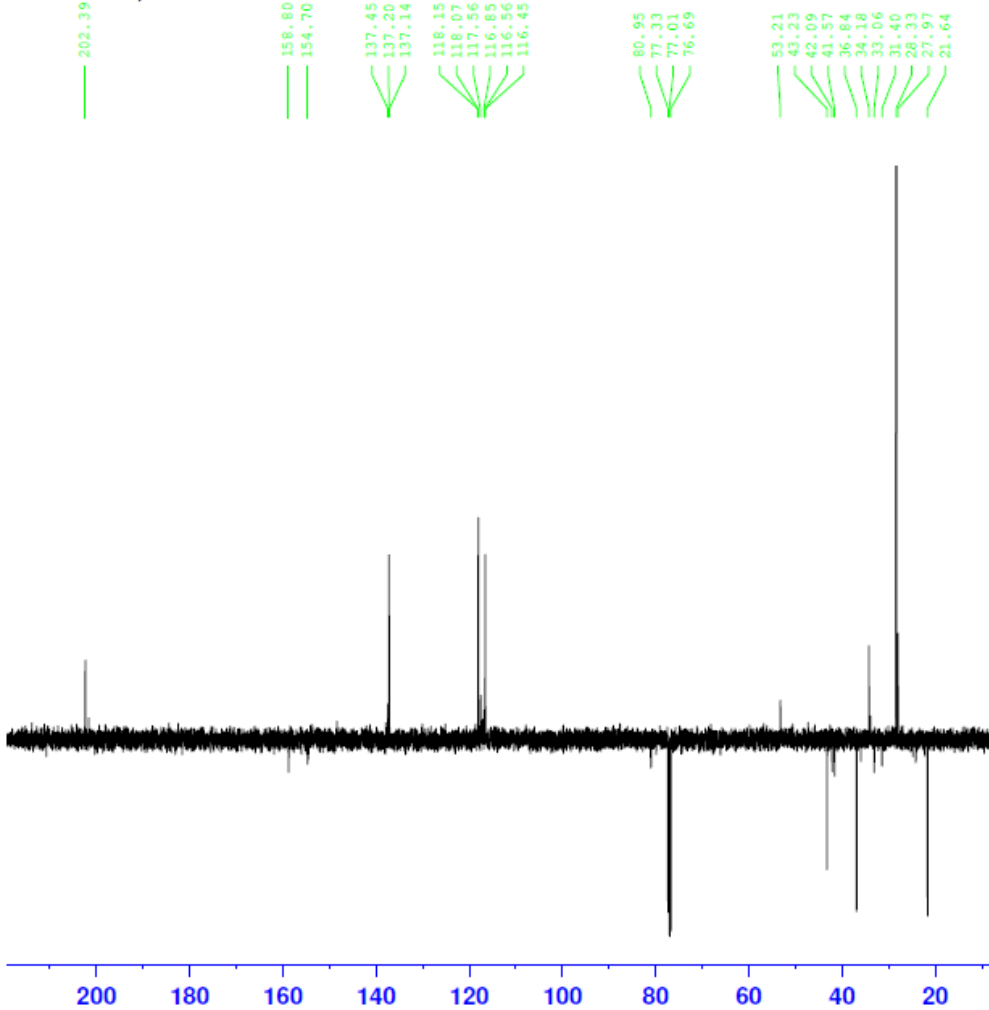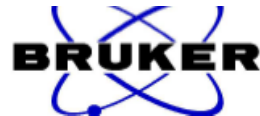

Current Data Parameters  
 NAME aet7-9-f4,6  
 EXPNO 12  
 PROCNO 1

F2 - Acquisition Parameters  
 Date\_ 20111015  
 Time 0.40  
 INSTRUM DPX400  
 PROBHD 5 mm QNP 1H/13  
 PULPROG deptq\_135  
 TD 65536  
 SOLVENT CDCl3  
 NS 512  
 DS 4  
 SWH 23980.814 Hz  
 FIDRES 0.365918 Hz  
 AQ 1.3664756 sec  
 RG 18390.4  
 DW 20.850 usec  
 DE 6.00 usec  
 TE 298.2 K  
 CNST2 145.0000000  
 D1 2.00000000 sec  
 d2 0.00344828 sec  
 D11 0.03000000 sec  
 DELTA 0.00001019 sec

----- CHANNEL f1 -----  
 NUC1 13C  
 P1 8.00 usec  
 P2 16.00 usec  
 PL1 -2.60 dB  
 SFO1 100.6228300 MHz

----- CHANNEL f2 -----  
 CPDPRG2 waltz16  
 NUC2 1H  
 P3 10.00 usec  
 P4 20.00 usec  
 PCPD2 80.00 usec  
 PL2 -1.50 dB  
 PL12 17.50 dB  
 SFO2 400.1316000 MHz

F2 - Processing parameters  
 SI 32768  
 SF 100.6127690 MHz  
 WDW EM  
 SSB 0  
 LB 1.00 Hz  
 GB 0  
 PC 1.40

Current Data Parameters  
 NAME met7-9-f4\_c  
 EXPNO 14  
 PROCNO 1

F2 - Acquisition Parameters  
 Date\_ 2011015  
 Time 1.01

INSTRUM spect  
 PROBRD 5 mm QNP 1H/13  
 PULPROG zgpg30  
 TD 1024  
 SOLVENT cdcl3  
 NS 4  
 DS 16  
 SWH 4280.822 Hz  
 FIDRES 4.186490 Hz  
 AQ 0.1196530 sec  
 RG 4096  
 DW 116.800 usec  
 DE 6.00 usec  
 TE 298.2 K  
 CMST2 145.0000000  
 d0 0.0000300 sec  
 d1 1.5716805 sec  
 d2 0.00344828 sec  
 d12 0.0002000 sec  
 d13 0.0000400 sec  
 d16 0.0002000 sec  
 DELTA1 0.00222428 sec  
 IN0 0.00003000 sec

CHANNEL F1  
 NUC1 1H  
 P1 10.00 usec  
 P2 20.00 usec  
 PL1 -1.50 dB  
 SFO1 400.1320448 MHz

CHANNEL F2  
 CPDPRG2 gqzgpg  
 NUC2 13C  
 P3 8.00 usec  
 PCPD2 74.00 usec  
 PL2 -2.00 dB  
 PL12 18.00 dB  
 SFO2 100.6203140 MHz

GRADIENT CHANNEL  
 GPNAM1 SINE.100  
 GPNAM2 SINE.100  
 GPNAM3 SINE.100  
 GPF1 50.00 %  
 GPF2 30.00 %  
 GPF3 40.10 %  
 P16 1000.00 usec

F1 - Acquisition parameters  
 NS0 2  
 TD 128  
 SFO1 100.6203 MHz  
 FIDRES 130.208328 Hz  
 SW 165.439 ppm  
 FWHM 0.9

F2 - Processing parameters  
 SI 1024  
 SF 400.1300365 MHz  
 MW 0.00 Hz  
 LB 0.00 Hz  
 GB 0  
 PC 1.40

F1 - Processing parameters  
 SI 1024  
 MC2 0.9  
 SF 100.6127690 MHz  
 MW 0.00 Hz  
 LB 0  
 GB 0

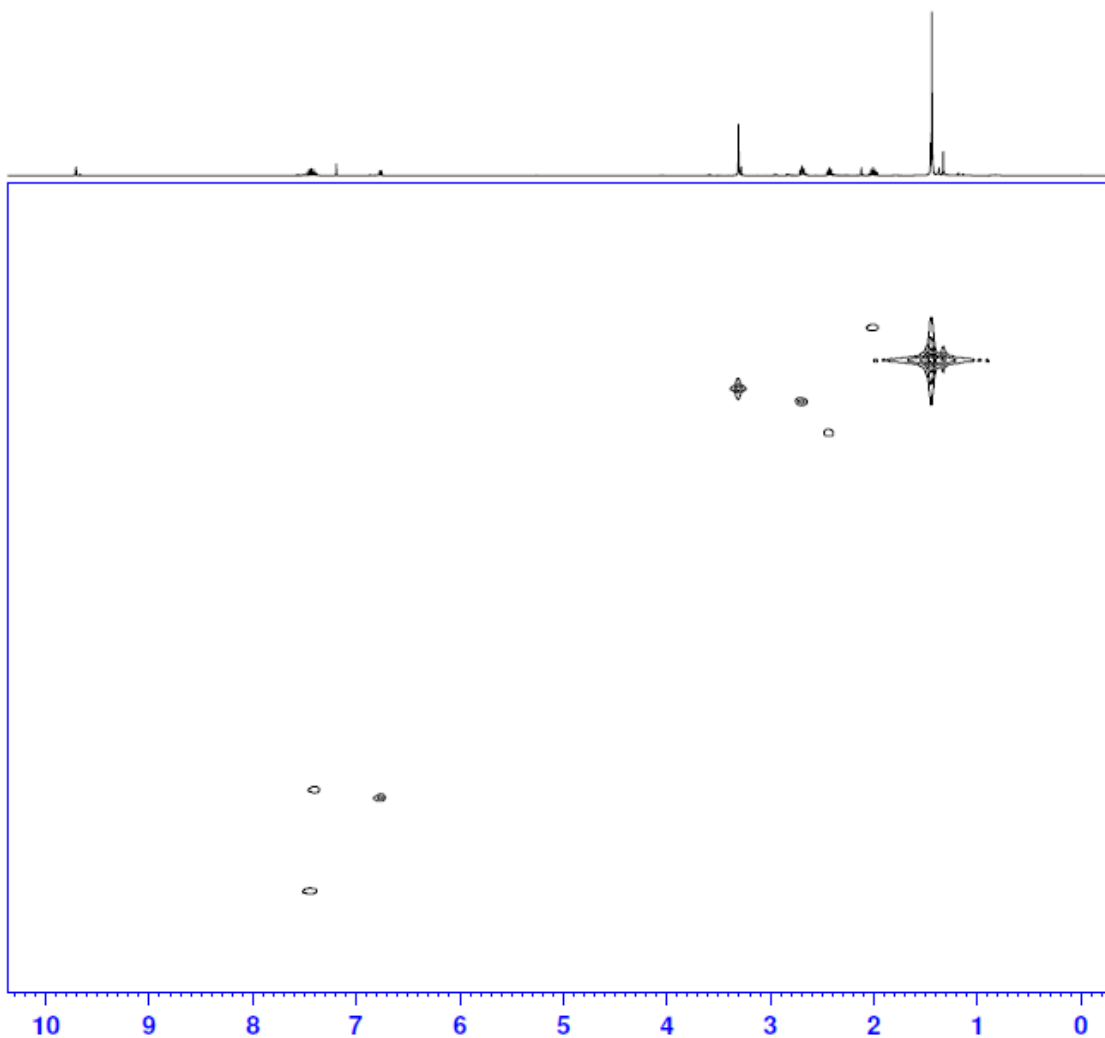

Methyl 3-(2-(6-((*tert*-butoxycarbonyl)(methyl)amino)pyridin-2-yl)ethyl)cyclobut-1-ene-1-carboxylate

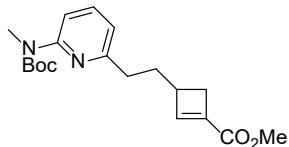

[Compound 47]

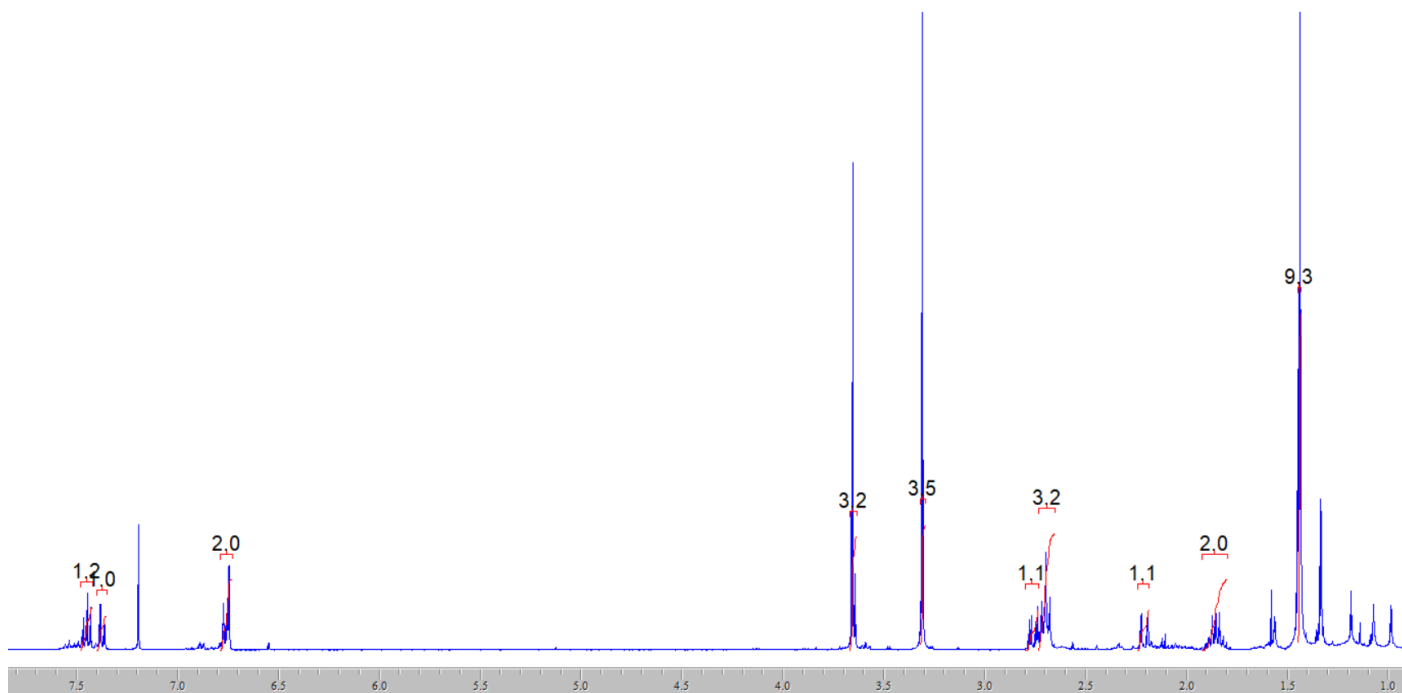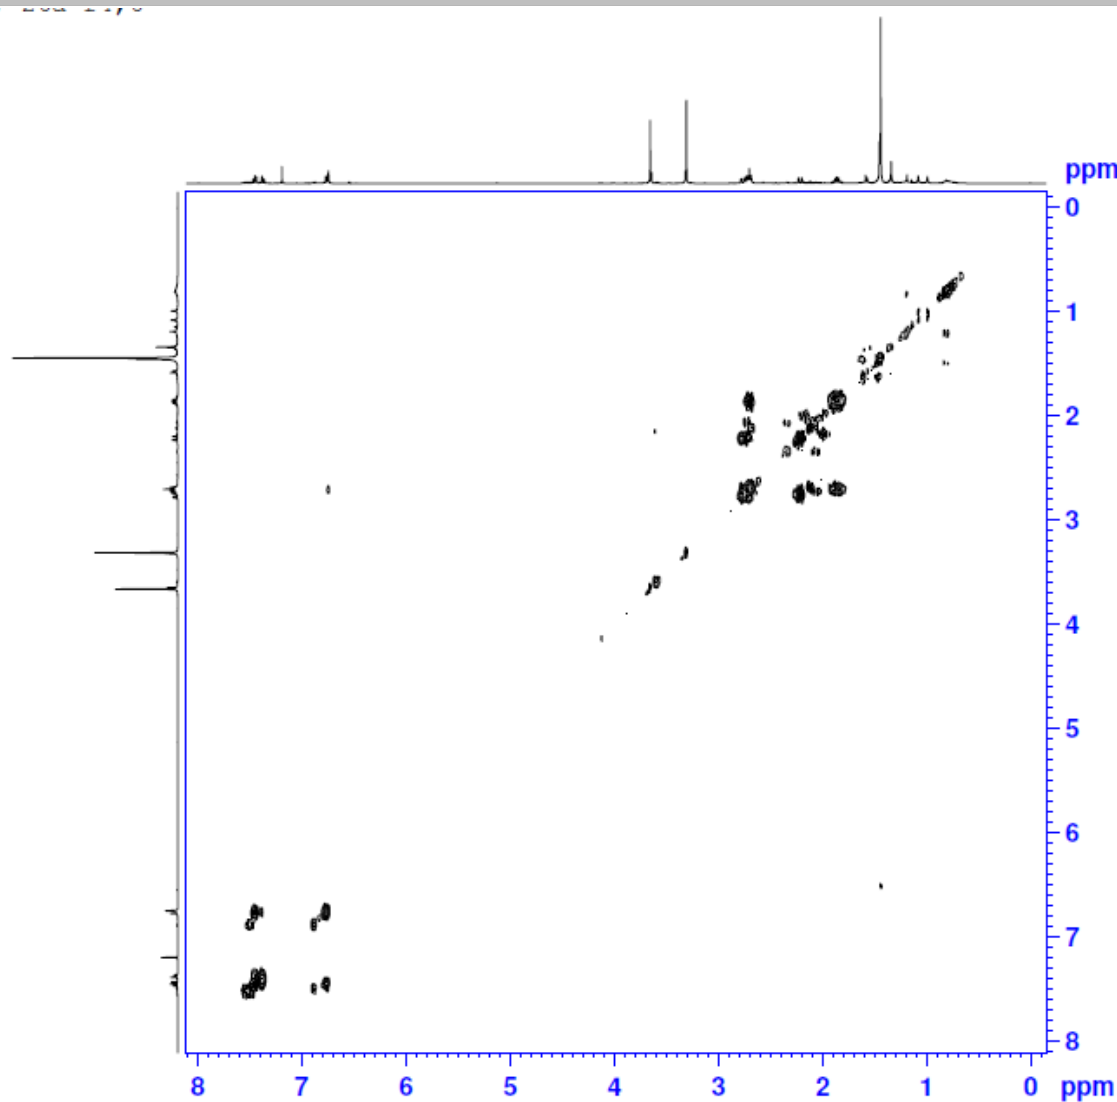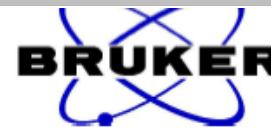

Current Data Parameters  
NAME ast7-26a-f4,6  
EXPNO 13  
PROCNO 1

F2 - Acquisition Parameters  
Date\_ 20111117  
Time 1.49  
INSTRUM DFX400  
PROBHD 5 mm QNP 1H/13  
PULPROG cosygmfzf  
TD 2048  
SOLVENT CDCl3  
NS 4  
DS 8  
SWH 3306.878 Hz  
FIDRES 1.614687 Hz  
AQ 0.3097076 sec  
RG 10321.3  
DW 151.200 usec  
DE 6.00 usec  
TE 294.2 K  
D0 0.00000300 sec  
D1 1.88244498 sec  
d13 0.00000400 sec  
D16 0.00020000 sec  
IN0 0.00030240 sec

----- CHANNEL f1 -----  
NUC1 1H  
P1 10.00 usec  
PL1 -1.50 dB  
SF01 400.1316264 MHz

----- GRADIENT CHANNEL -----  
CPNAM1 SINE.100  
CPNAM2 SINE.100  
CPNAM3 SINE.100  
GPZ1 16.00 %  
GPZ2 12.00 %  
GPZ3 40.00 %  
P16 1000.00 usec

F1 - Acquisition parameters  
ND0 1  
TD 128  
SF01 400.1316 MHz  
FIDRES 25.834988 Hz  
SW 8.264 ppm  
FrMODE QF

F2 - Processing parameters  
SI 1024  
SF 400.1300355 MHz  
WDW SINE  
SSB 0  
LB 0.00 Hz  
GB 0  
PC 1.40

F1 - Processing parameters  
SI 1024  
MC2 QF  
SF 400.1300355 MHz  
WDW SINE  
SSB 0  
LB 0.00 Hz  
GB 0

aet7-26a-f4, 6

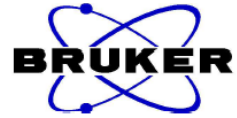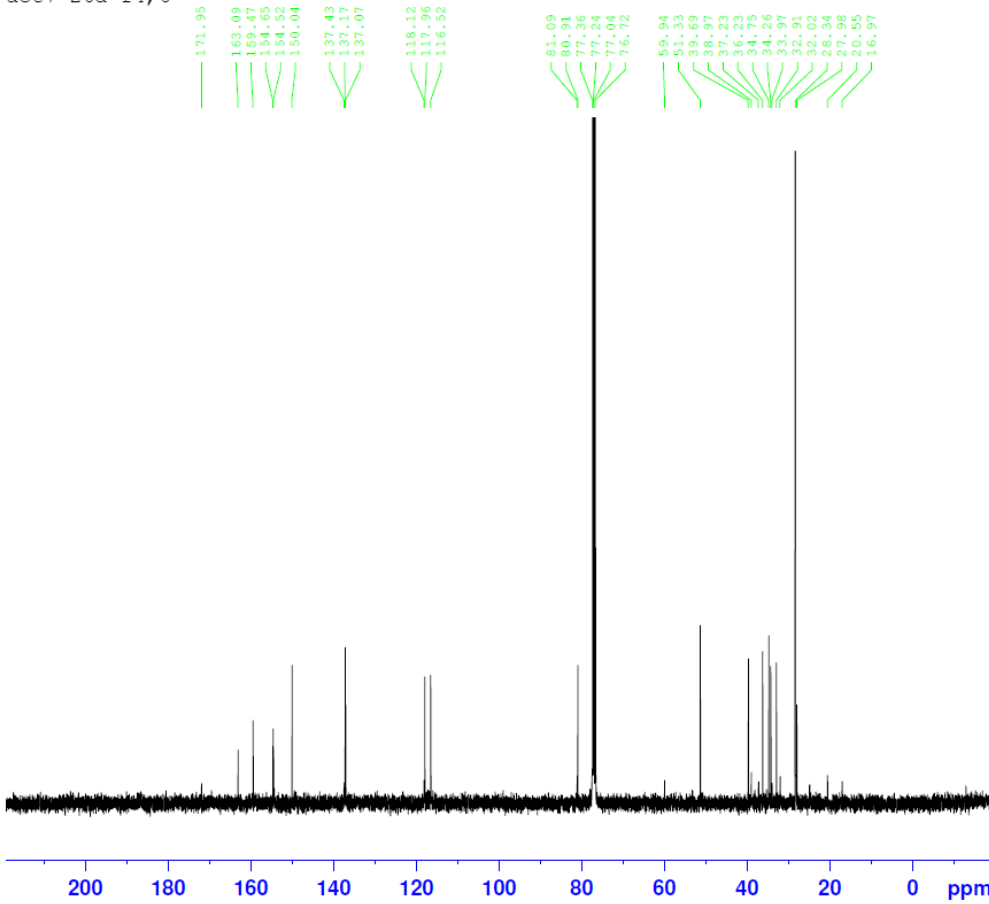

Current Data Parameters  
 NAME aet7-26a-f4, 6  
 EXPNO 11  
 PROCNO 1

F2 - Acquisition Parameters  
 Date\_ 2011117  
 Time 1.18  
 INSTRUM DPX400  
 PROBHD 5 mm QNP 1H/13  
 PULPROG zgpg30  
 TD 65536  
 SOLVENT CDCl3  
 NS 1024  
 DS 4  
 SWH 23980.814 Hz  
 FIDRES 0.365918 Hz  
 AQ 1.3664756 sec  
 RG 1824.6  
 DW 20.850 usec  
 DE 6.00 usec  
 TE 295.2 K  
 D1 2.00000000 sec  
 d11 0.03000000 sec  
 DELTA 1.89999998 sec  
 TD0 1

===== CHANNEL f1 =====  
 NUC1 13C  
 P1 8.00 usec  
 PL1 -2.60 dB  
 SFO1 100.6228298 MHz

===== CHANNEL f2 =====  
 CPDPRG2 waltz16  
 NUC2 1H  
 PCPD2 80.00 usec  
 PL2 -1.50 dB  
 PL12 17.50 dB  
 PL13 17.50 dB  
 SFO2 400.1316005 MHz

F2 - Processing parameters  
 SI 32768  
 SF 100.6127690 MHz  
 WDW EM  
 SSB 0  
 LB 1.00 Hz  
 GB 0  
 PC 1.40

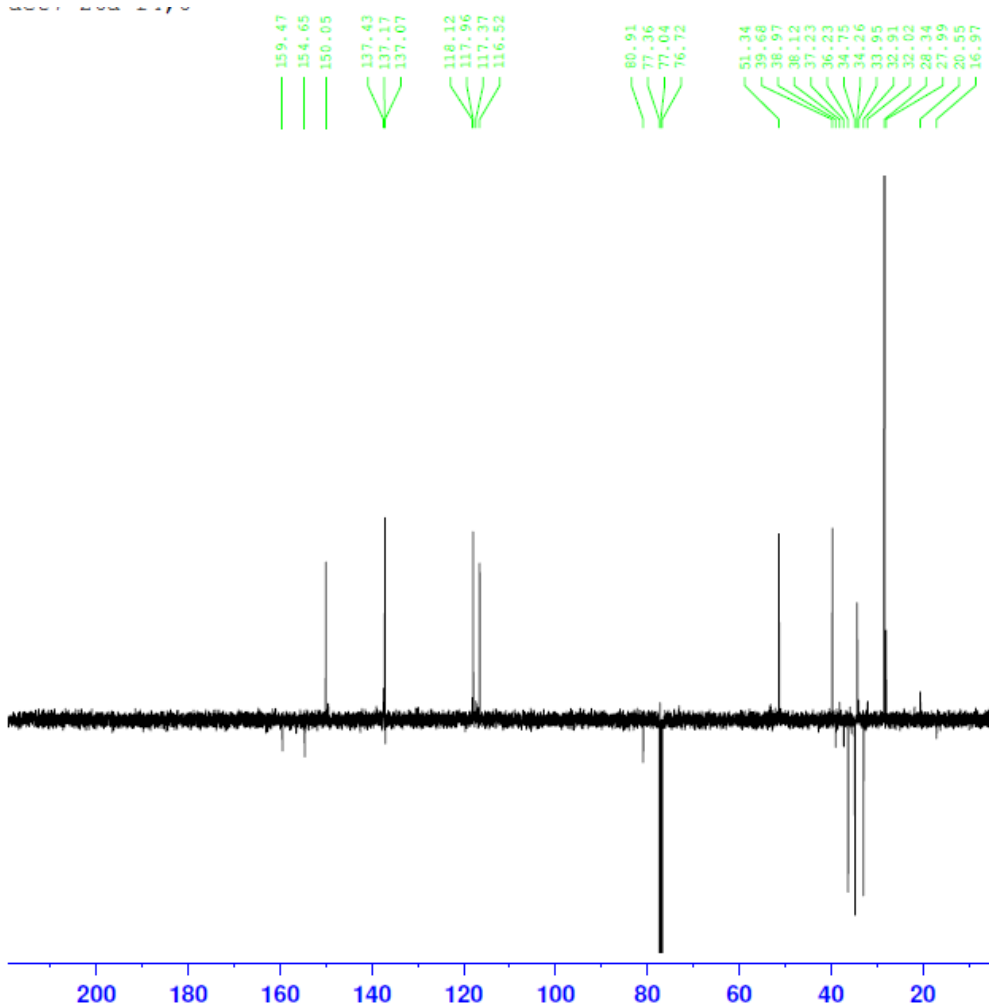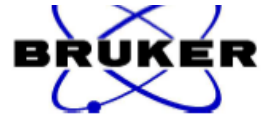

Current Data Parameters  
 NAME aet7-26a-f4, 6  
 EXPNO 12  
 PROCNO 1

F2 - Acquisition Parameters  
 Date\_ 2011117  
 Time 1.48  
 INSTRUM DPX400  
 PROBHD 5 mm QNP 1H/13  
 PULPROG deptq\_135  
 TD 65536  
 SOLVENT CDCl3  
 NS 512  
 DS 4  
 SWH 23980.814 Hz  
 FIDRES 0.365918 Hz  
 AQ 1.3664756 sec  
 RG 16384  
 DW 20.850 usec  
 DE 6.00 usec  
 TE 294.2 K  
 CNST2 145.0000000  
 D1 2.00000000 sec  
 d2 0.00344828 sec  
 D11 0.03000000 sec  
 DELTA 0.00001019 sec

----- CHANNEL f1 -----  
 NUC1 13C  
 P1 8.00 usec  
 P2 16.00 usec  
 PL1 -2.60 dB  
 SFO1 100.6228300 MHz

----- CHANNEL f2 -----  
 CPDPRG2 waltz16  
 NUC2 1H  
 P3 10.00 usec  
 P4 20.00 usec  
 PCPD2 80.00 usec  
 PL2 -1.50 dB  
 PL12 17.50 dB  
 SFO2 400.1316000 MHz

F2 - Processing parameters  
 SI 32768  
 SF 100.6127690 MHz  
 WDW EM  
 SSB 0  
 LB 1.00 Hz  
 GB 0  
 PC 1.40

Current Data Parameters  
 NAME: act7-26a-14\_C  
 EXPNO: 14  
 PROCNO: 1

F2 - Acquisition Parameters  
 Date\_: 20111117  
 Time: 2.09  
 INSTRUM: spect  
 PULPROG: zgpg30  
 TD: 1024  
 SOLVENT: cdcl3  
 NS: 4  
 DS: 16  
 SWH: 3306.878 Hz  
 FIDRES: 3.229373 Hz  
 AQ: 0.1548788 sec  
 RG: 5120.6  
 DW: 151.200 usec  
 DE: 6.00 usec  
 TE: 294.2 K  
 CMT2: 145.0000000  
 d0: 0.000003000 sec  
 d1: 1.47235203 sec  
 d2: 0.00344828 sec  
 d12: 0.00002000 sec  
 d13: 0.00000400 sec  
 d16: 0.00020000 sec  
 DELTA1: 0.00222428 sec  
 TNO: 0.00003000 sec

CHANNEL F1  
 NUC1: 1H  
 P1: 10.00 usec  
 P2: 20.00 usec  
 PL1: -1.50 dB  
 SFO1: 400.1316264 MHz  
 CHANNEL F2  
 CPDPRG2: gpg3  
 NUC2: 13C  
 P3: 8.00 usec  
 PCPD2: 74.00 usec  
 PL2: -3.00 dB  
 PL12: 18.00 dB  
 SFO2: 100.6203140 MHz  
 GRADIENT CHANNEL  
 GPMAM1: SINE.100  
 GPMAM2: SINE.100  
 GPMAM3: SINE.100  
 GPF1: 50.00 %  
 GPF2: 30.00 %  
 GPF3: 40.10 %  
 P16: 1000.00 usec

F1 - Acquisition parameters  
 MD: 2  
 TD: 128  
 SFO1: 100.6203 MHz  
 FIDRES: 130.208328 Hz  
 SW: 165.639 ppm  
 FMODE: CF

F2 - Processing parameters  
 SI: 1024  
 SF: 400.1300355 MHz  
 WDW: QSINE  
 SSB: 2  
 LB: 0.00 Hz  
 GB: 0  
 PC: 1.40

F1 - Processing parameters  
 SI: 1024  
 MC: CF  
 SF: 100.6127690 MHz  
 WDW: QSINE  
 SSB: 2  
 LB: 0.00 Hz  
 GB: 0

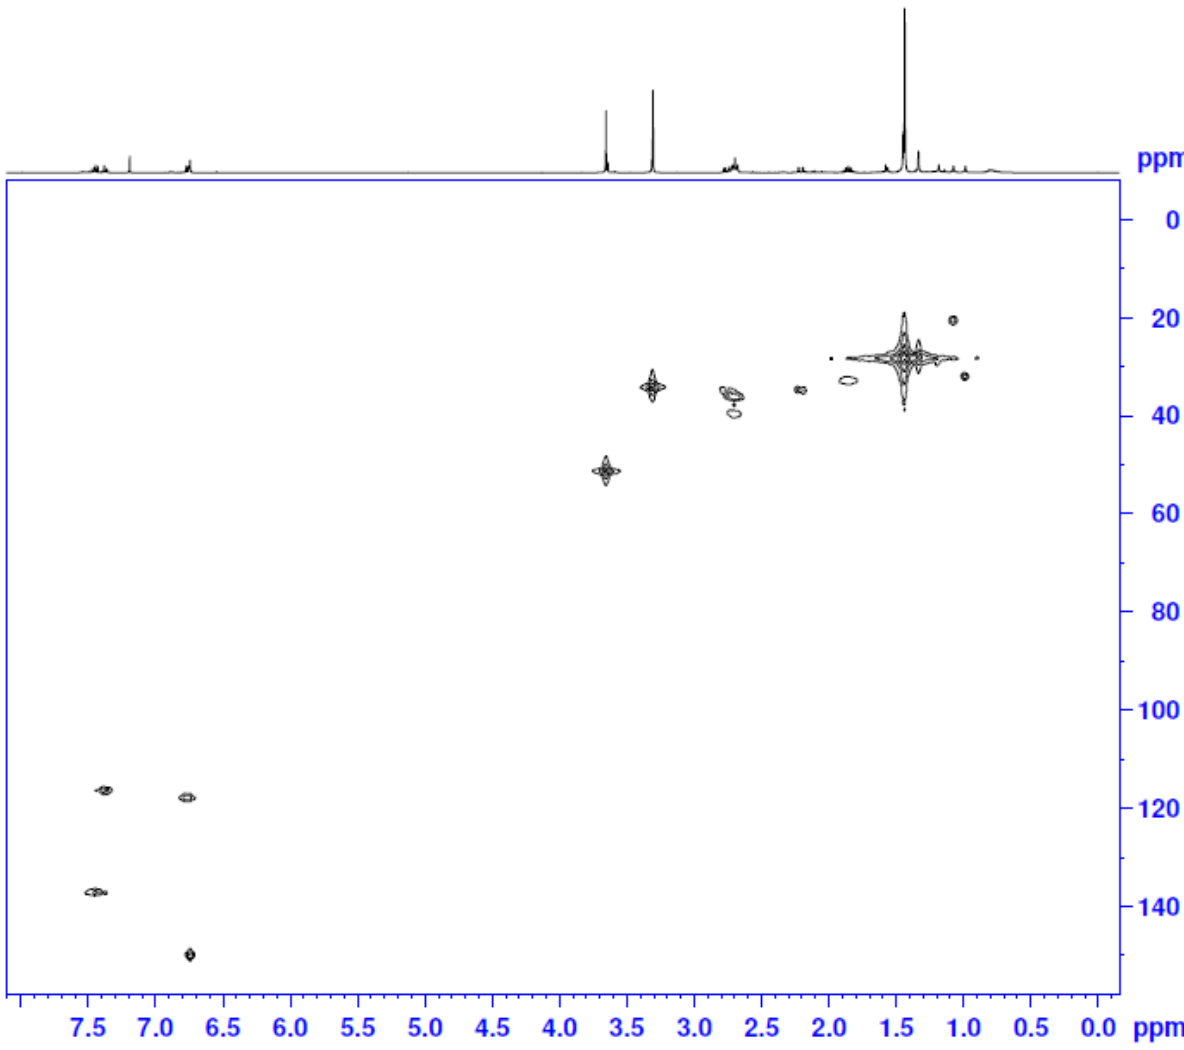

Methyl (1*r*\*,3*s*\*)-3-(2-(6-((tert-butoxycarbonyl)(methyl)amino)pyridin-2-yl)ethyl) cyclobutane-1-

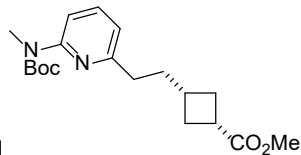

carboxylate [Compound 48]

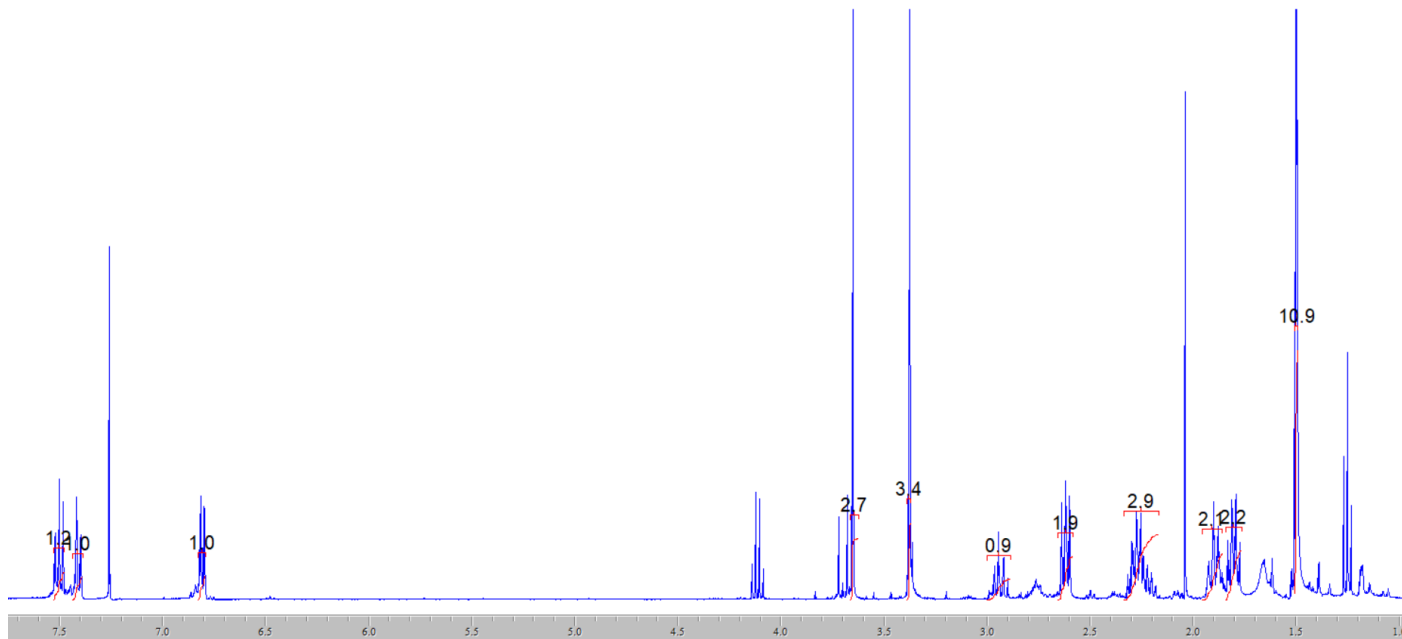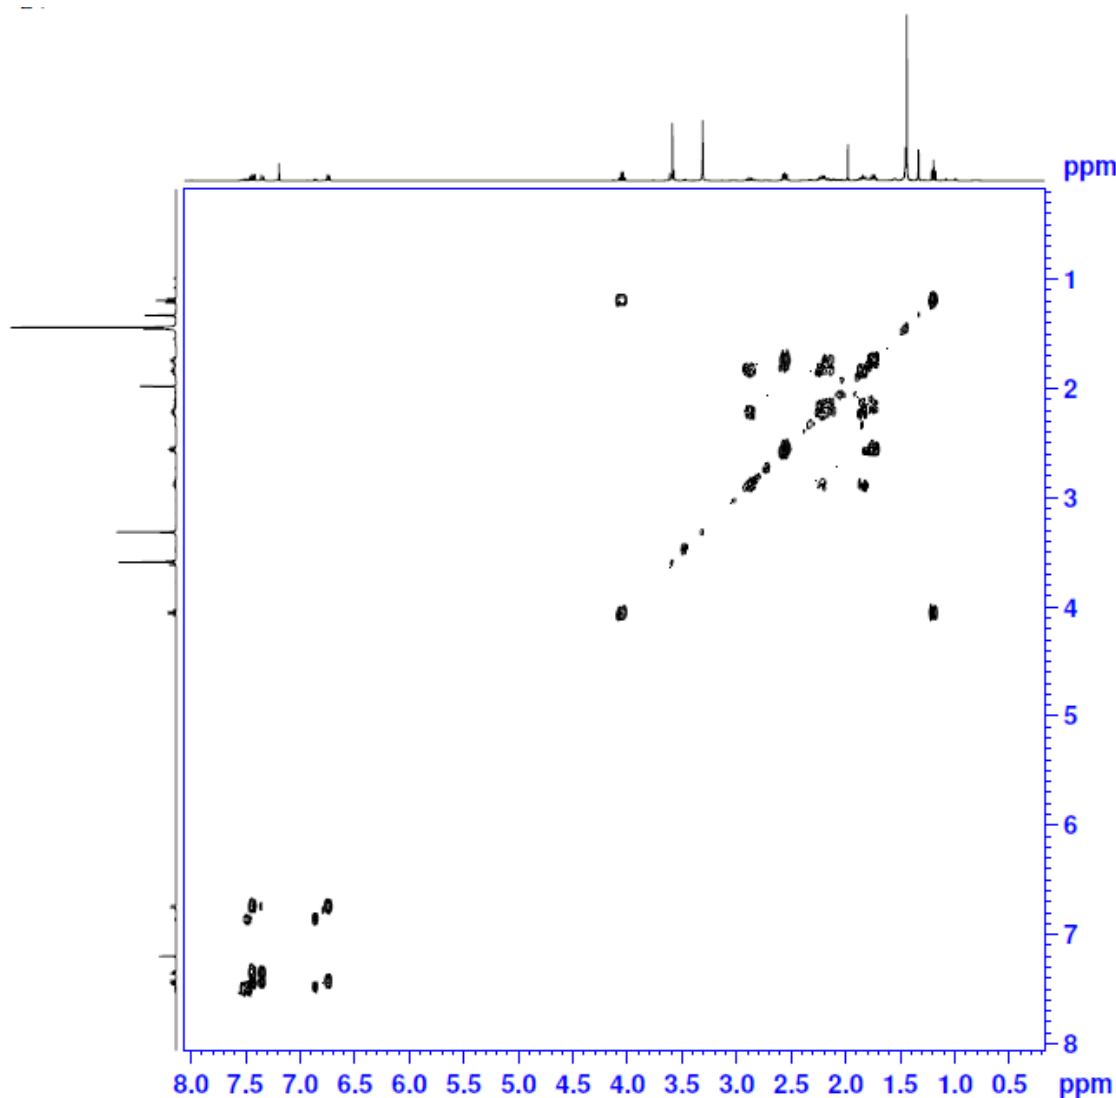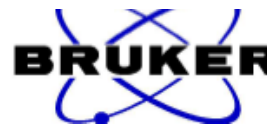

Current Data Parameters  
 NAME set7-27  
 EXPNO 15  
 PROCNO 1

F2 - Acquisition Parameters  
 Date\_ 20111123  
 Time 19.51  
 INSTRUM DPX400  
 PROBRD 5 mm QNP 1H/13  
 PULPROG cosygpsmfgf  
 TD 2048  
 SOLVENT CDCl3  
 NS 4  
 DS 8  
 SWH 3156.566 Hz  
 FIDRES 1.541292 Hz  
 AQ 0.3244532 sec  
 RG 11585.2  
 DW 158.400 usec  
 DE 6.00 usec  
 TE 294.2 K  
 D0 0.00000300 sec  
 D1 1.86810899 sec  
 d13 0.00000400 sec  
 D16 0.00020000 sec  
 INO 0.00031680 sec

----- CHANNEL f1 -----  
 MUC1 1H  
 P1 10.00 usec  
 PL1 -1.50 dB  
 SFO1 400.1316815 MHz

----- GRADIENT CHANNEL -----  
 GPNAM1 SINE.100  
 GPNAM2 SINE.100  
 GPNAM3 SINE.100  
 GPZ1 16.00 %  
 GPZ2 12.00 %  
 GPZ3 40.00 %  
 P16 1000.00 usec

F1 - Acquisition parameters  
 MD0 1  
 TD 128  
 SFO1 400.1317 MHz  
 FIDRES 24.660669 Hz  
 SW 7.889 ppm  
 FrMODE QF

F2 - Processing parameters  
 SI 1024  
 SF 400.1300351 MHz  
 WDW SINE  
 SSB 0  
 LB 0.00 Hz  
 GB 0  
 FC 1.40

F1 - Processing parameters  
 SI 1024  
 MC2 QF  
 SF 400.1300351 MHz  
 WDW SINE  
 SSB 0  
 LB 0.00 Hz  
 GB 0

aet7-27

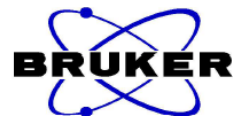

Current Data Parameters  
 NAME aet7-27  
 EXPNO 10  
 PROCNO 1

F2 - Acquisition Parameters  
 Date\_ 20111123  
 Time 19.03  
 INSTRUM DPX400  
 PROBHD 5 mm QNP 1H/13  
 PULPROG zgpg30  
 TD 65536  
 SOLVENT CDCl3  
 NS 1024  
 DS 4  
 SWH 23980.814 Hz  
 FIDRES 0.365918 Hz  
 AQ 1.3664756 sec  
 RG 1024  
 DW 20.850 usec  
 DE 6.00 usec  
 TE 294.2 K  
 D1 2.00000000 sec  
 d11 0.03000000 sec  
 DELTA 1.89999998 sec  
 TD0 1

===== CHANNEL f1 =====  
 NUC1 13C  
 P1 8.00 usec  
 PL1 -2.60 dB  
 SFO1 100.6228298 MHz

===== CHANNEL f2 =====  
 CPDPRG2 waltz16  
 NUC2 1H  
 PCPD2 80.00 usec  
 PL2 -1.50 dB  
 PL12 17.50 dB  
 PL13 17.50 dB  
 SFO2 400.1316005 MHz

F2 - Processing parameters  
 SI 32768  
 SF 100.6127690 MHz  
 WDW EM  
 SSB 0  
 LB 1.00 Hz  
 GB 0  
 PC 1.40

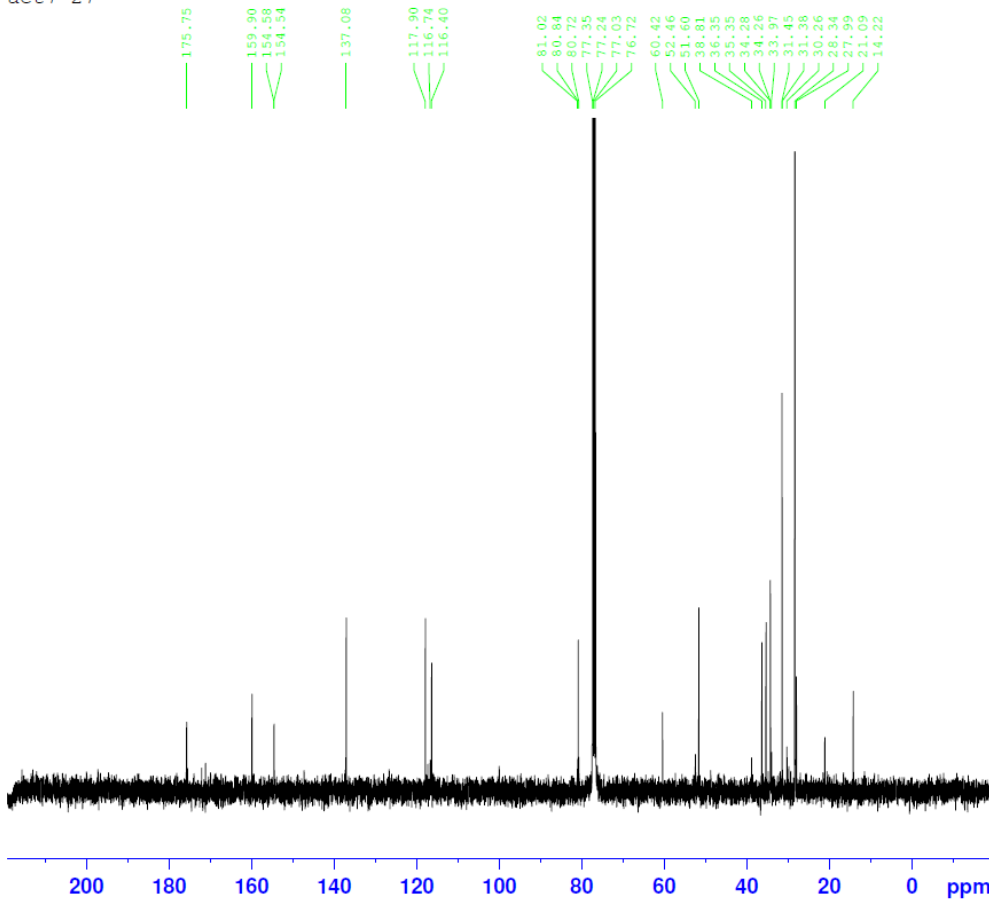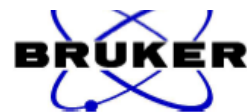

Current Data Parameters  
 NAME aet7-27  
 EXPNO 11  
 PROCNO 1

F2 - Acquisition Parameters  
 Date\_ 20111123  
 Time 19.33  
 INSTRUM DPX400  
 PROBHD 5 mm QNP 1H/13  
 PULPROG deptq 135  
 TD 65536  
 SOLVENT CDCl3  
 NS 512  
 DS 4  
 SWH 23980.814 Hz  
 FIDRES 0.365918 Hz  
 AQ 1.3664756 sec  
 RG 11585.2  
 DW 20.850 usec  
 DE 6.00 usec  
 TE 294.2 K  
 CNST2 145.0000000  
 D1 2.00000000 sec  
 d2 0.00344828 sec  
 D11 0.03000000 sec  
 DELTA 0.00001019 sec

----- CHANNEL f1 -----  
 NUC1 13C  
 P1 8.00 usec  
 P2 16.00 usec  
 PL1 -2.60 dB  
 SFO1 100.6228300 MHz

----- CHANNEL f2 -----  
 CPDPRG2 waltz16  
 NUC2 1H  
 P3 10.00 usec  
 P4 20.00 usec  
 PCPD2 80.00 usec  
 PL2 -1.50 dB  
 PL12 17.50 dB  
 SFO2 400.1316000 MHz

F2 - Processing parameters  
 SI 32768  
 SF 100.6127690 MHz  
 WDW EM  
 SSB 0  
 LB 1.00 Hz  
 GB 0  
 PC 1.40

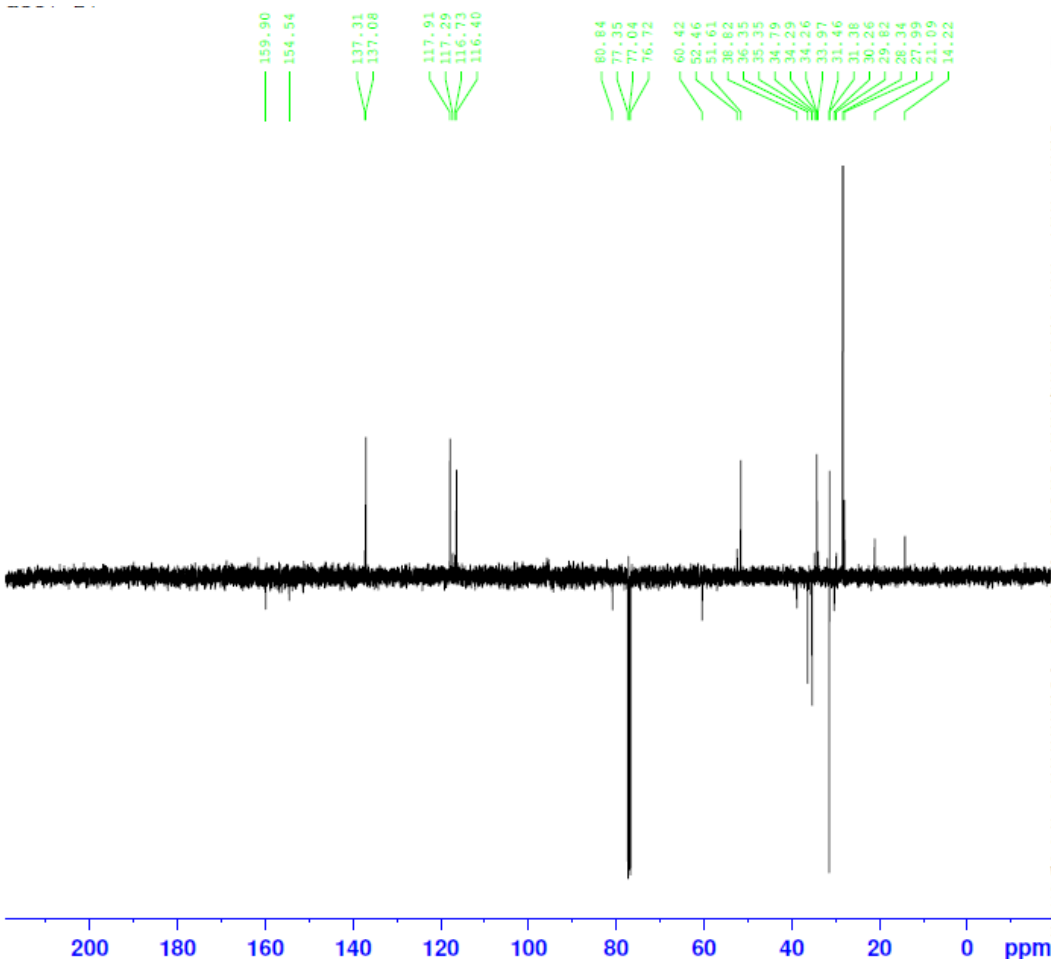

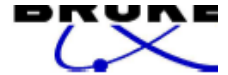

Current Data Parameters  
NAME ac7-27  
EXFNO 13  
PROCNO 1

F2 - Acquisition Parameters  
Date\_ 2011123  
Time 19.36  
INSTRUM DFX400  
PROBHD 5 mm QNP 1H/13  
PULPROG hmqcpgpgf  
TD 1024  
SOLVENT CDCl3  
NS 4  
DS 16  
SWH 3156.566 Hz  
FIDRES 3.082584 Hz  
AQ 0.1622516 sec  
RG 5120.6  
SW 158.400 usec  
DE 6.00 usec  
TE 294.2 K  
CMT2 145.000000 sec  
d0 0.00003000 sec  
d1 1.46518397 sec  
d2 0.00344828 sec  
d12 0.00002000 sec  
d13 0.00004000 sec  
d16 0.00020000 sec  
DELTA1 0.0022428 sec  
IND 0.00003000 sec

----- CHANNEL f1 -----  
NUC1 1H  
P1 10.00 usec  
P2 20.00 usec  
PL1 -1.50 dB  
SFO1 400.1316815 MHz

----- CHANNEL f2 -----  
CPDPRG2 gwhf  
NUC2 13C  
P3 9.00 usec  
PCPD2 74.00 usec  
PL2 -3.00 dB  
PL12 18.00 dB  
SFO2 100.6203140 MHz

----- GRADIENT CHANNEL -----  
GPNAM1 SINE.100  
GPNAM2 SINE.100  
GPNAM3 SINE.100  
GPE1 50.00 %  
GPE2 30.00 %  
GPE3 40.10 %  
P16 1000.00 usec

F1 - Acquisition parameters  
ND0 2  
TD 128  
SFO1 100.6203 MHz  
FIDRES 130.208328 Hz  
SW 165.639 ppm  
FrMODE QF

F2 - Processing parameters  
SI 1024  
SF 400.1300351 MHz  
WDW GCINE  
SSB 2  
LB 0.00 Hz  
GB 0  
PC 1.40

F1 - Processing parameters  
SI 1024  
MC2 QF  
SF 100.6127690 MHz  
WDW GCINE  
SSB 2  
LB 0.00 Hz  
GB 0

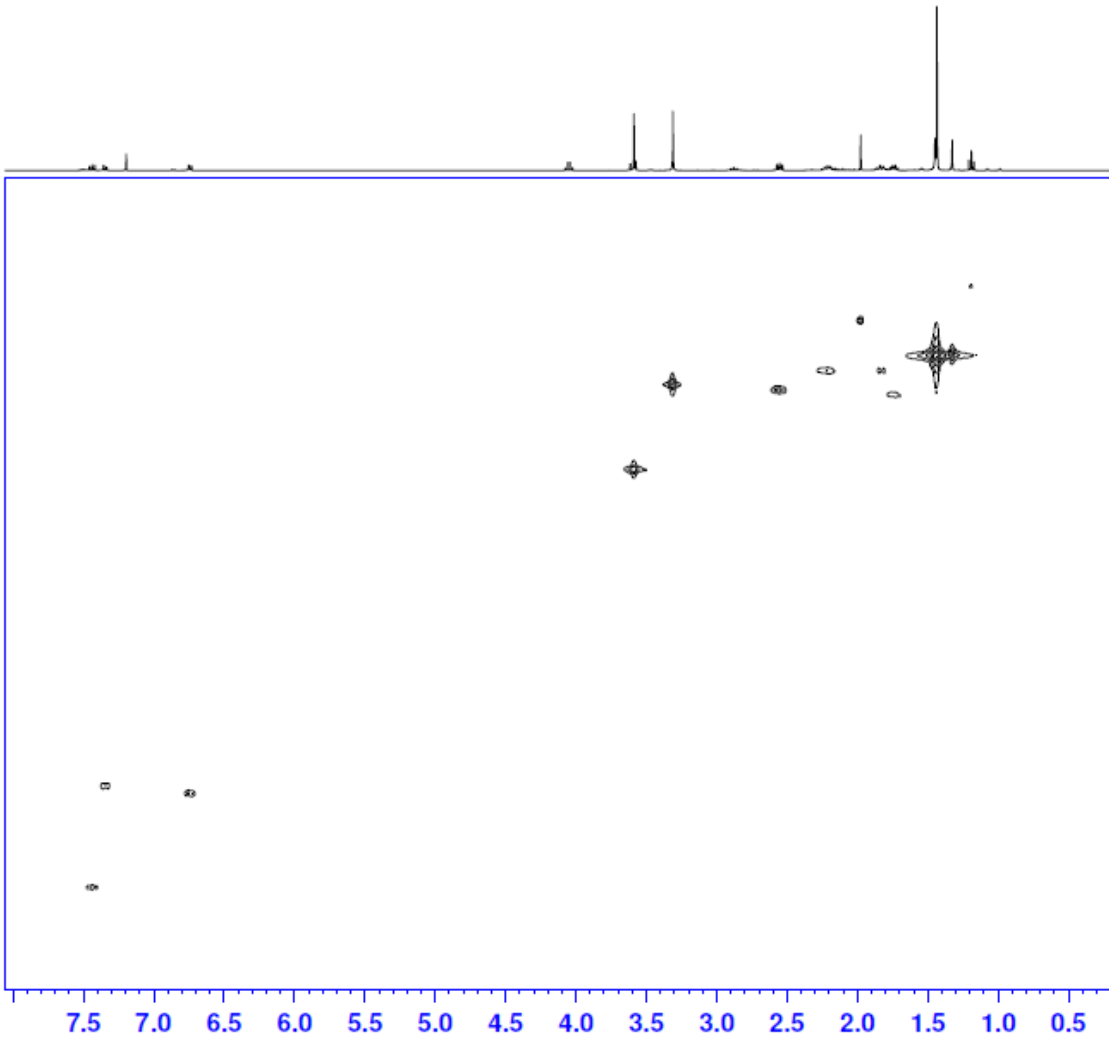



Methyl (*S*)-3-((1*r*\*,3*R*\*)-3-(2-(6-((*tert*-butoxycarbonyl)(methyl)amino)pyridin-2-yl)ethyl)cyclobutane-

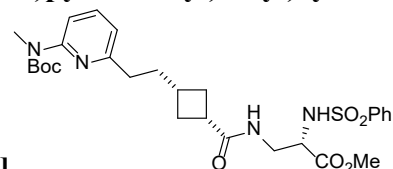

1-carboxamido)-2-(phenylsulfonamido)propanoate [Compound 51]

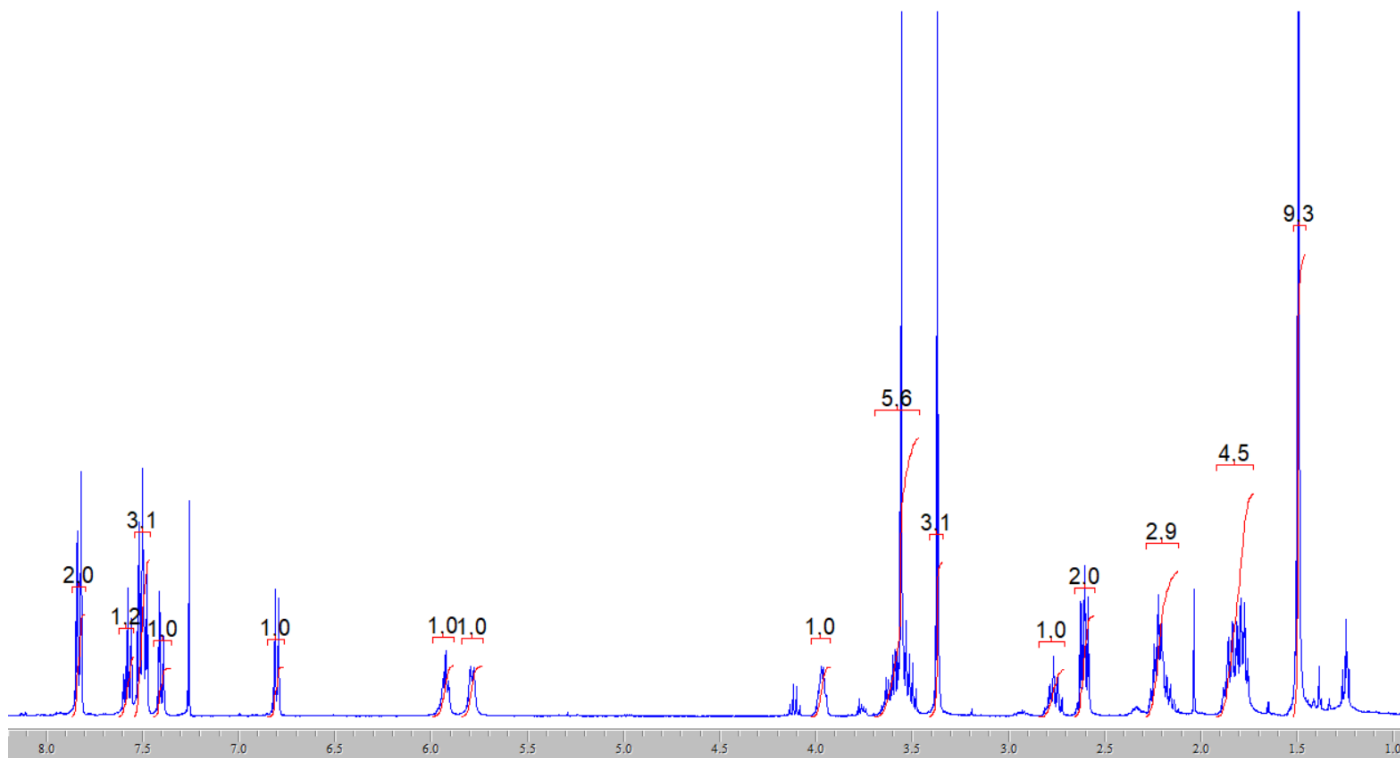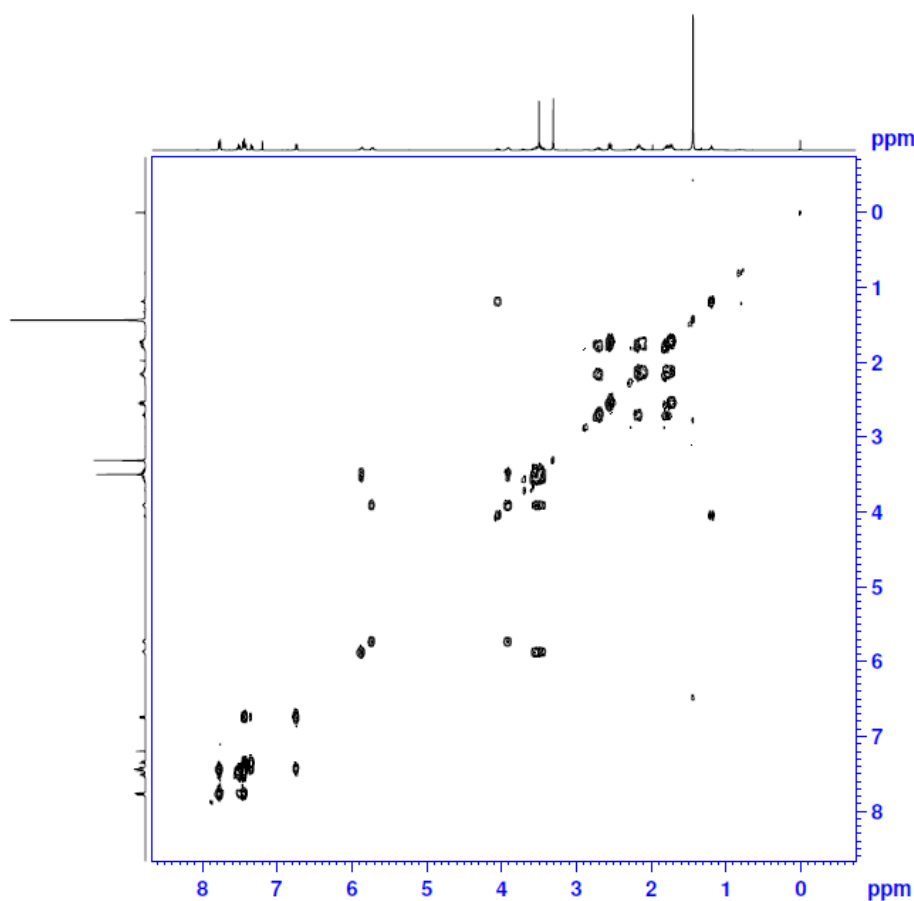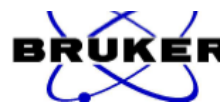

Current Data Parameters  
NAME ast7-39-2  
EXPNO 13  
PROCNO 1

F2 - Acquisition Parameters  
Date\_ 2011209  
Time 19.36  
INSTRUM DPK400  
PROBHD 5 mm QNP 1H/13  
PULPROG cosygpmpfgf  
TD 2048  
SOLVENT CDCl3  
NS 4  
DS 8  
SWH 2765.060 Hz  
FIDRES 1.938408 Hz  
AQ 0.2720244 sec  
RG 8192  
DW 132.800 usec  
DE 6.00 usec  
TE 294.2 K  
D0 0.00000300 sec  
D1 1.91930902 sec  
d13 0.00000400 sec  
D16 0.00020000 sec  
IN0 0.00026560 sec

CHANNEL f1  
NUC1 1H  
P1 10.00 usec  
PL1 -1.50 dB  
SFO1 400.1316186 MHz

GRADIENT CHANNEL  
GPNAM1 SINE.100  
GPNAM2 SINE.100  
GPNAM3 SINE.100  
GPE1 16.00 %  
GPE2 12.00 %  
GPE3 40.00 %  
P16 1000.00 usec

F1 - Acquisition parameters  
ND0 1  
TD 128  
SFO1 400.1316 MHz  
FIDRES 29.41534 Hz  
SW 9.410 ppm  
FRMODE QF

F2 - Processing parameters  
SI 1024  
SF 400.1300340 MHz  
WVW SINE  
SSB 0  
LB 0.00 Hz  
GB 0  
FC 1.40

F1 - Processing parameters  
SI 1024  
MC2 QF  
SF 400.1300340 MHz  
WVW SINE  
SSB 0  
LB 0.00 Hz  
GB 0

aet7-39-2

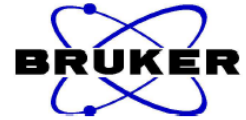

Current Data Parameters  
 NAME aet7-39-2  
 EXPNO 11  
 PROCNO 1

F2 - Acquisition Parameters  
 Date\_ 20111209  
 Time 19.04  
 INSTRUM DPX400  
 PROBHD 5 mm QNP 1H/13  
 PULPROG zgpg30  
 TD 65536  
 SOLVENT CDC13  
 NS 1024  
 DS 4  
 SWH 23980.814 Hz  
 FIDRES 0.365918 Hz  
 AQ 1.3664756 sec  
 RG 1290.2  
 DW 20.850 usec  
 DE 6.00 usec  
 TE 294.2 K  
 D1 2.00000000 sec  
 d11 0.03000000 sec  
 DELTA 1.89999998 sec  
 TD0 1

----- CHANNEL f1 -----  
 NUC1 13C  
 P1 8.00 usec  
 PL1 -2.60 dB  
 SFO1 100.6228298 MHz

----- CHANNEL f2 -----  
 CPDPRG2 waltz16  
 NUC2 1H  
 PCPD2 80.00 usec  
 PL2 -1.50 dB  
 PL12 17.50 dB  
 PL13 17.50 dB  
 SFO2 400.1316005 MHz

F2 - Processing parameters  
 SI 32768  
 SF 100.6127690 MHz  
 WDW EM  
 SSB 0  
 LB 1.00 Hz  
 GB 0  
 PC 1.40

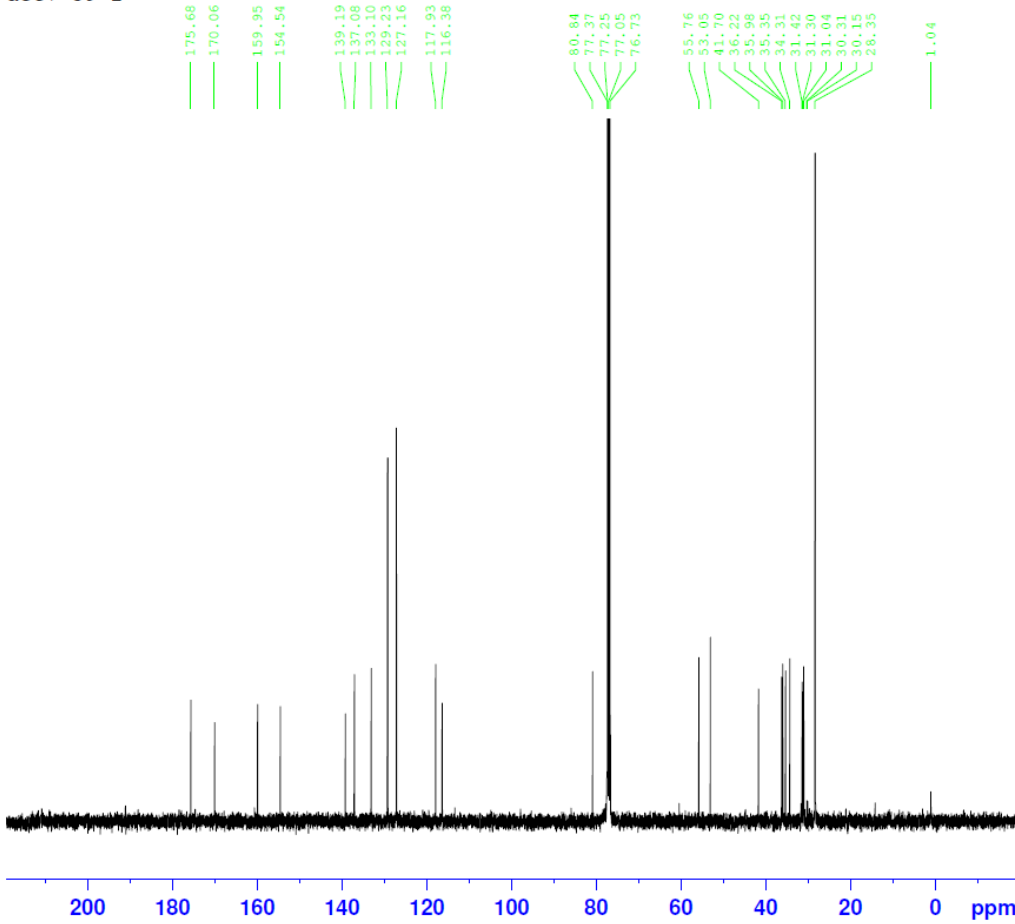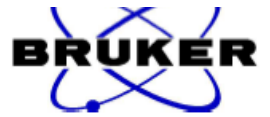

Current Data Parameters  
 NAME aet7-39-2  
 EXPNO 12  
 PROCNO 1

F2 - Acquisition Parameters  
 Date\_ 20111209  
 Time 19.35  
 INSTRUM DPX400  
 PROBHD 5 mm QNP 1H/13  
 PULPROG deptq 135  
 ID 65536  
 SOLVENT CDC13  
 NS 512  
 DS 4  
 SWH 23980.814 Hz  
 FIDRES 0.365918 Hz  
 AQ 1.3664756 sec  
 RG 18390.4  
 DW 20.850 usec  
 DE 6.00 usec  
 TE 294.2 K  
 CNST2 145.0000000  
 D1 2.00000000 sec  
 d2 0.00344828 sec  
 D11 0.03000000 sec  
 DELTA 0.00001019 sec

----- CHANNEL f1 -----  
 NUC1 13C  
 P1 8.00 usec  
 P2 16.00 usec  
 PL1 -2.60 dB  
 SFO1 100.6228300 MHz

----- CHANNEL f2 -----  
 CPDPRG2 waltz16  
 NUC2 1H  
 P3 10.00 usec  
 P4 20.00 usec  
 PCPD2 80.00 usec  
 PL2 -1.50 dB  
 PL12 17.50 dB  
 SFO2 400.1316000 MHz

F2 - Processing parameters  
 SI 32768  
 SF 100.6127690 MHz  
 WDW EM  
 SSB 0  
 LB 1.00 Hz  
 GB 0  
 PC 1.40

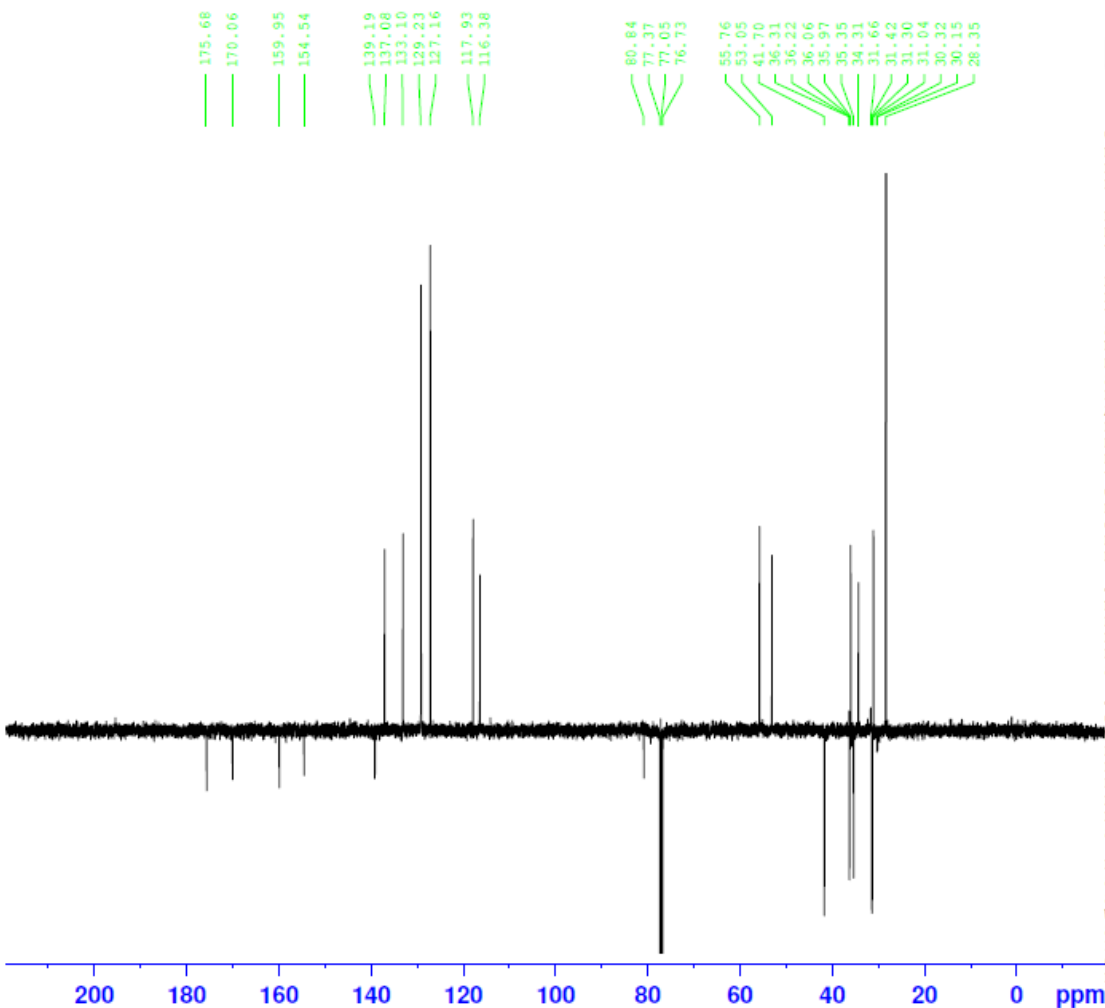

Current Data Parameters  
 NAME ant7-39-2  
 EXPNO 14  
 PROCNO 1

F2 - Acquisition Parameters  
 Date\_ 2011209  
 Time 19.56  
 INSTRUM dpk400  
 PULPROG 5 mm CWP 1M/13  
 FULPROG hmcgpgpf  
 TD 1024  
 SOLVENT cdcl3  
 NS 4  
 DS 16  
 SWH 3765.060 Hz  
 FIDRES 3.676817 Hz  
 AQ 0.1360372 sec  
 RG 5160.6  
 DW 132.800 usec  
 DE 6.00 usec  
 TE 294.2 K  
 CMST2 145.000000  
 d0 0.0000300 sec  
 d1 1.4907940 sec  
 d2 0.00344828 sec  
 d12 0.0002000 sec  
 d13 0.0000400 sec  
 d16 0.0002000 sec  
 DELTA1 0.0022428 sec  
 IN0 0.0000300 sec

CHANNEL F1  
 NUC1 1H  
 P1 10.00 usec  
 P2 20.00 usec  
 PL1 -1.50 dB  
 SFO1 400.1316186 MHz

CHANNEL F2  
 CPDPRG2 9atp  
 NUC2 13C  
 P3 8.00 usec  
 PCPD2 74.00 usec  
 PL2 -3.00 dB  
 PL12 18.00 dB  
 SFO2 100.6203140 MHz

GRADIENT CHANNEL  
 GFNAM1 SINE.100  
 GFNAM2 SINE.100  
 GFNAM3 SINE.100  
 GFE1 50.00 t  
 GFE2 30.00 t  
 GFE3 40.10 t  
 F1G 1000.00 usec

F1 - Acquisition parameters  
 MD0 2  
 TD 128  
 SFO1 100.6203 MHz  
 FIDRES 130.208328 Hz  
 SW 165.639 ppm  
 F2MODE qf

F2 - Processing parameters  
 SI 1024  
 SF 400.1300340 MHz  
 WDM QSINE  
 SSB 2  
 LB 0.00 Hz  
 GB 0  
 PC 1.40

F1 - Processing parameters  
 SI 1024  
 SF 100.6127690 MHz  
 WDM QSINE  
 SSB 0  
 LB 0.00 Hz  
 GB 0

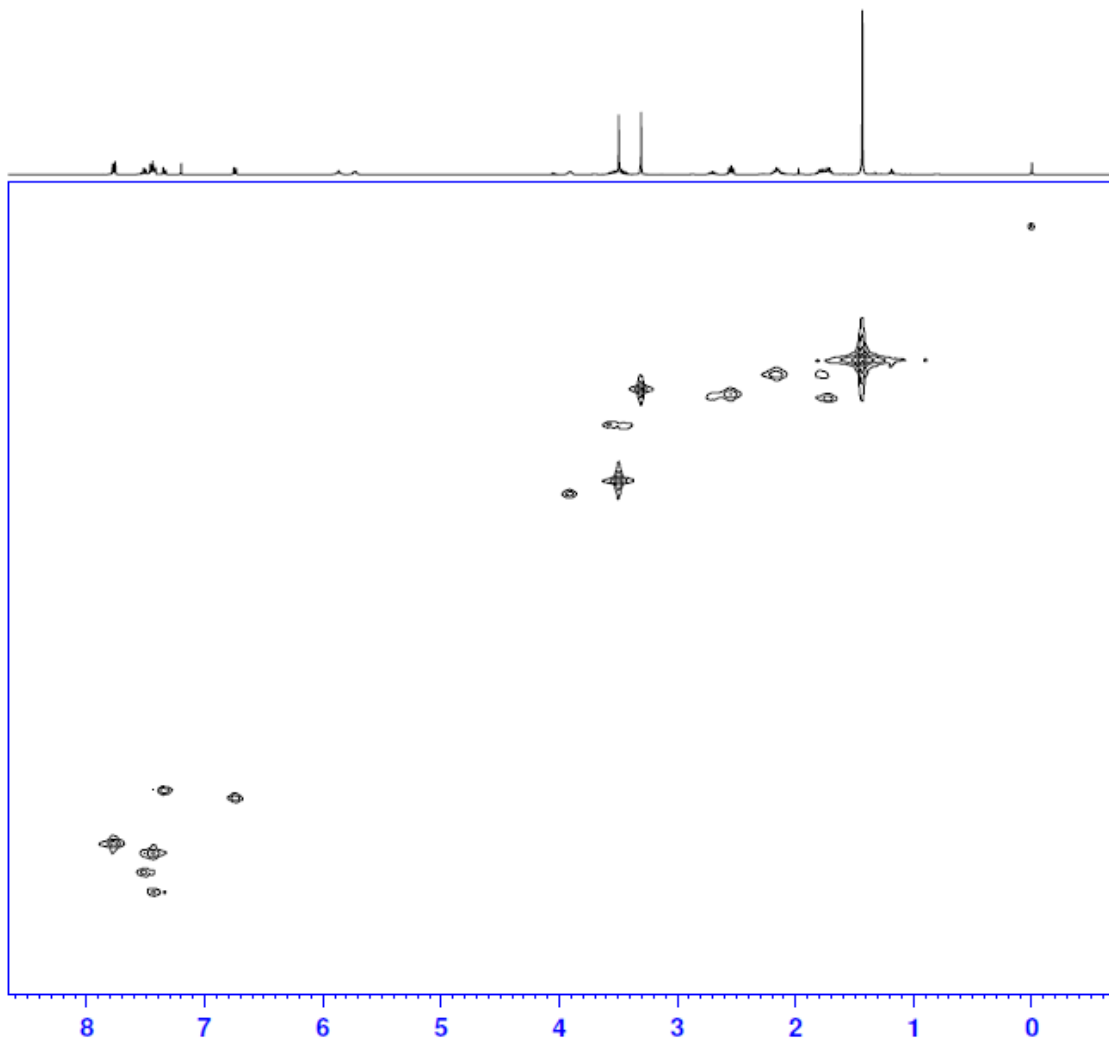

Methyl (S)-3-((1*r*\*,3*R*\*)-3-(2-(6-((tert-butoxycarbonyl)(methyl)amino)pyridin-2-yl)ethyl)cyclobutane-1-

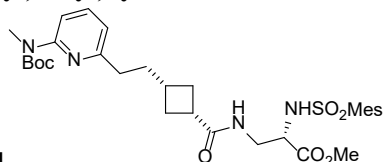

carboxamido)-2-(2,4,6-trimethylphenylsulfonamido)propanoate [Compound 52]

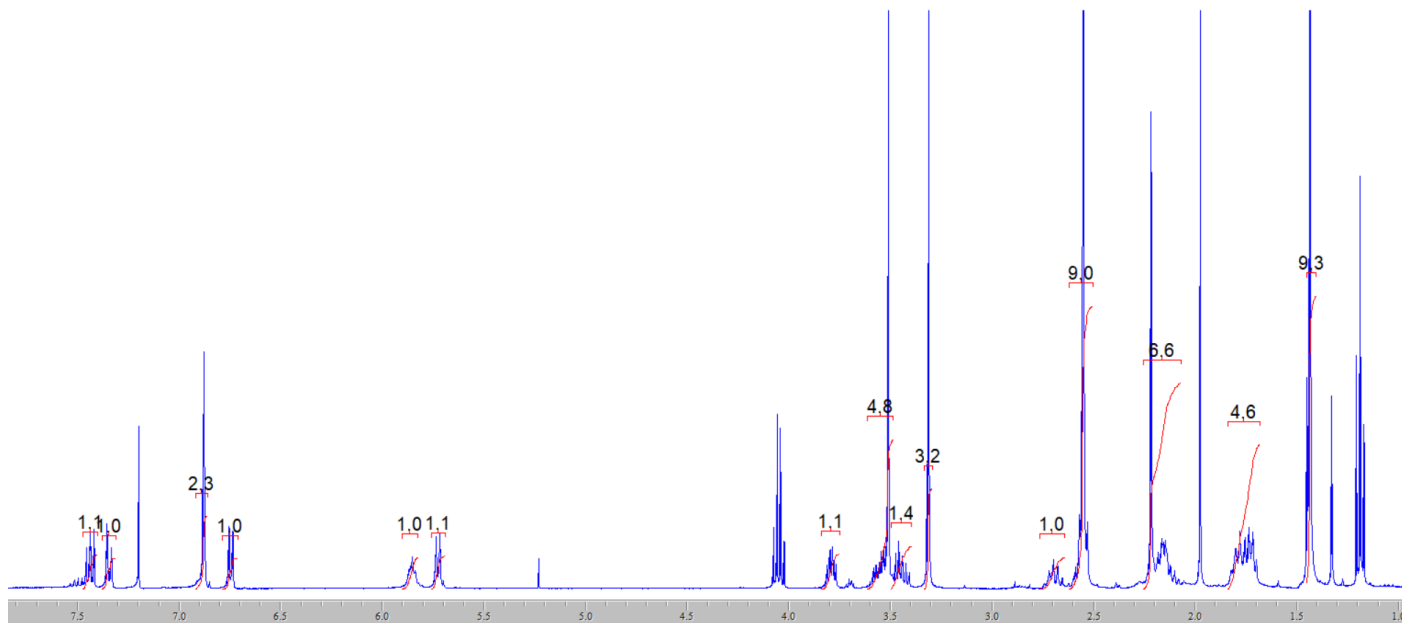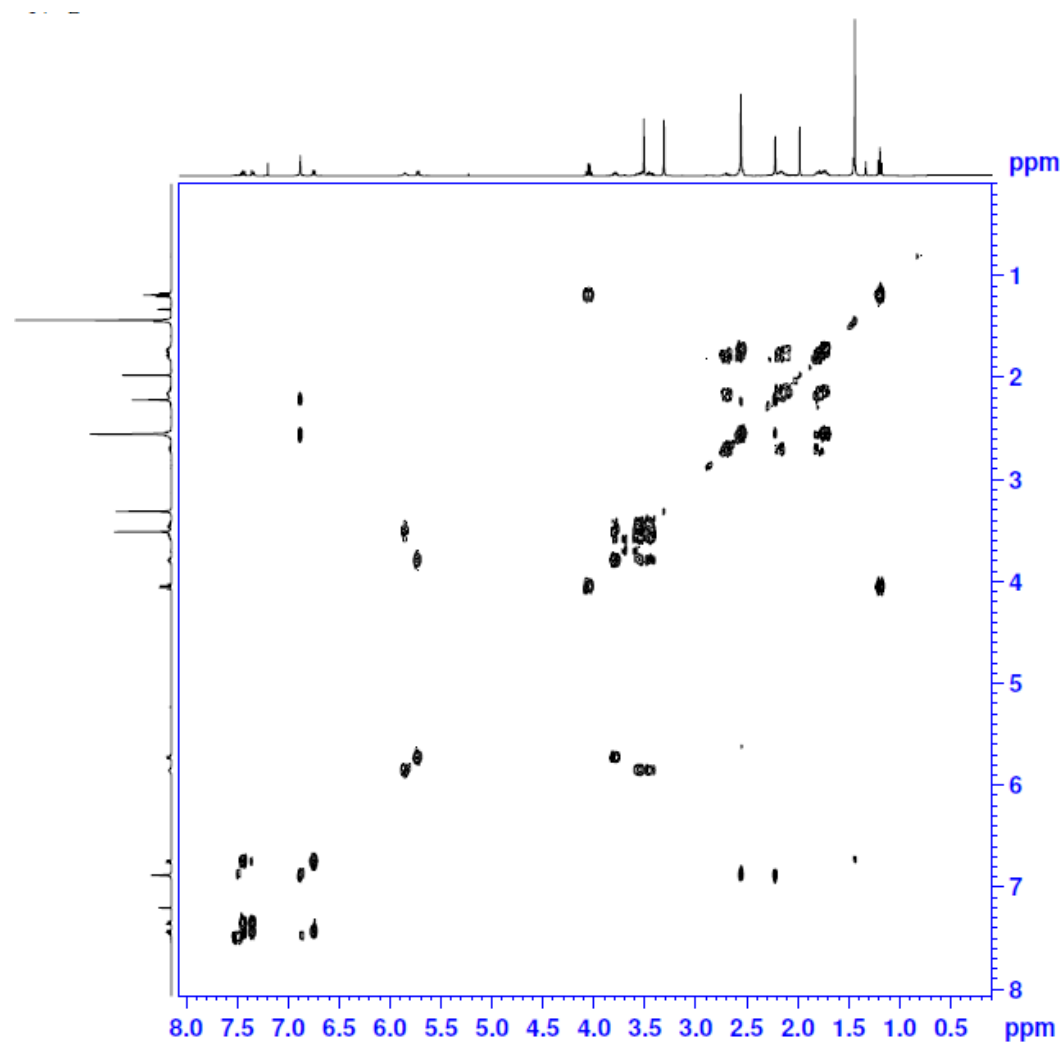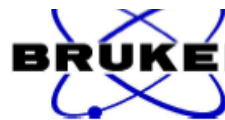

Current Data Parameters  
NAME set7-47-2  
EXPNO 23  
PROCNO 1

F2 - Acquisition Parameters  
Date\_ 20111221  
Time 19.40  
INSTRUM DFX400  
PROBHD 5 mm QNP 1H/13  
PULPROG cosygpsifzf  
TD 2048  
SOLVENT CDCl3  
NS 4  
DS 8  
SWH 3188.775 Hz  
FIDRES 1.557019 Hz  
AQ 0.3211764 sec  
RG 5160.6  
DW 156.800 usec  
DE 6.00 usec  
TE 294.2 K  
D0 0.00000300 sec  
D1 1.87015700 sec  
d13 0.00000400 sec  
D16 0.00020000 sec  
IN0 0.00031360 sec

----- CHANNEL f1 -----  
NUC1 1H  
P1 10.00 usec  
PL1 -1.50 dB  
SFO1 400.1316663 MHz

----- GRADIENT CHANNEL -----  
GPNAM1 SINE.100  
GPNAM2 SINE.100  
GPNAM3 SINE.100  
GPE1 16.00 %  
GPE2 12.00 %  
GPE3 40.00 %  
P16 1000.00 usec

F1 - Acquisition parameters  
ND0 1  
TD 128  
SFO1 400.1317 MHz  
FIDRES 24.912308 Hz  
SW 7.969 ppm  
FRMODE QF

F2 - Processing parameters  
SI 1024  
SF 400.1300336 MHz  
WDW SINE  
SSB 0  
LB 0.00 Hz  
GB 0  
PC 1.40

F1 - Processing parameters  
SI 1024  
MC2 QF  
SF 400.1300336 MHz  
WDW SINE  
SSB 0  
LB 0.00 Hz  
GB 0

aet7-47-2

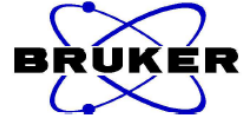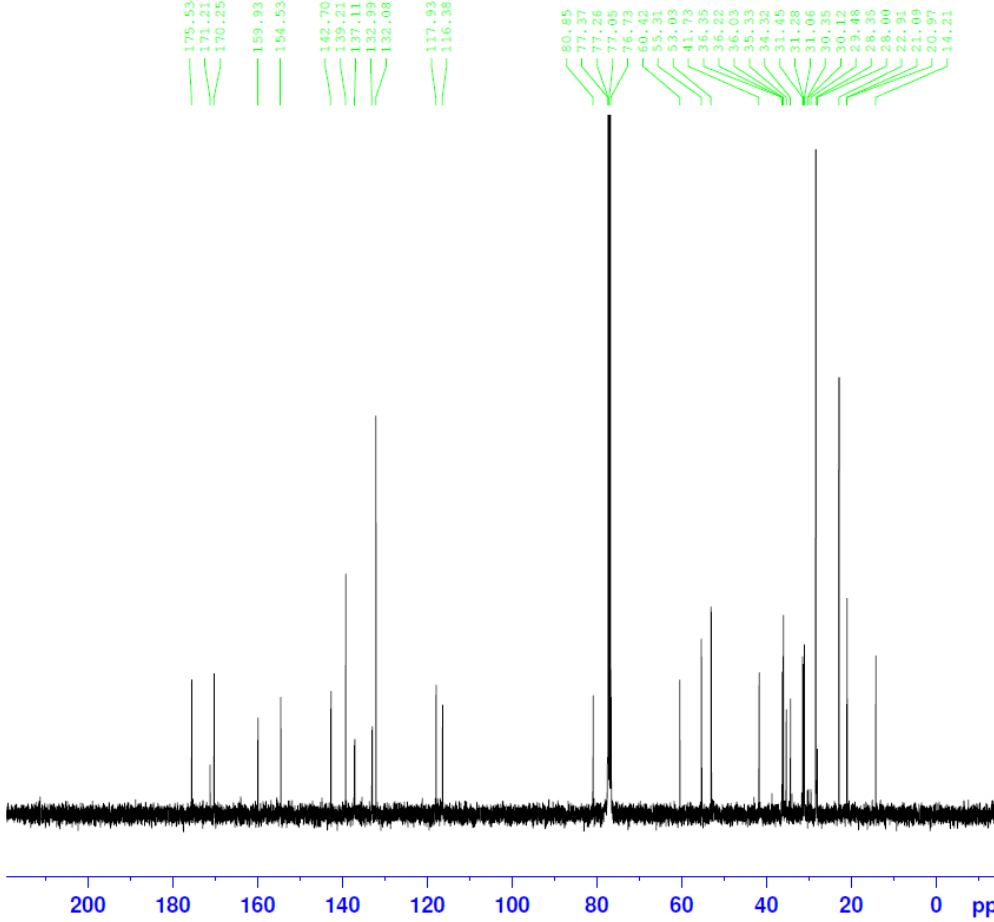

Current Data Parameters  
 NAME aet7-47-2  
 EXPNO 21  
 PROCNO 1

F2 - Acquisition Parameters  
 Date\_ 20111221  
 Time 19.09  
 INSTRUM DPX400  
 PROBHD 5 mm QNP 1H/13  
 PULPROG zgpg30  
 TD 65536  
 SOLVENT CDCl3  
 NS 1024  
 DS 4  
 SWH 23980.814 Hz  
 FIDRES 0.365918 Hz  
 AQ 1.3664756 sec  
 RG 1024  
 DW 20.850 usec  
 DE 6.00 usec  
 TE 294.2 K  
 D1 2.00000000 sec  
 d11 0.03000000 sec  
 DELTA 1.89999998 sec  
 TD0 1

===== CHANNEL f1 =====  
 NUC1 13C  
 P1 8.00 usec  
 PL1 -2.60 dB  
 SFO1 100.6228298 MHz

===== CHANNEL f2 =====  
 CPDPRG2 waltz16  
 NUC2 1H  
 PCPD2 80.00 usec  
 PL2 -1.50 dB  
 PL12 17.50 dB  
 PL13 17.50 dB  
 SFO2 400.1316005 MHz

F2 - Processing parameters  
 SI 32768  
 SF 100.6127690 MHz  
 WDW EM  
 SSB 0  
 LB 1.00 Hz  
 GB 0  
 PC 1.40

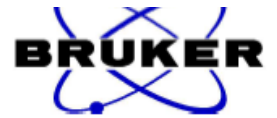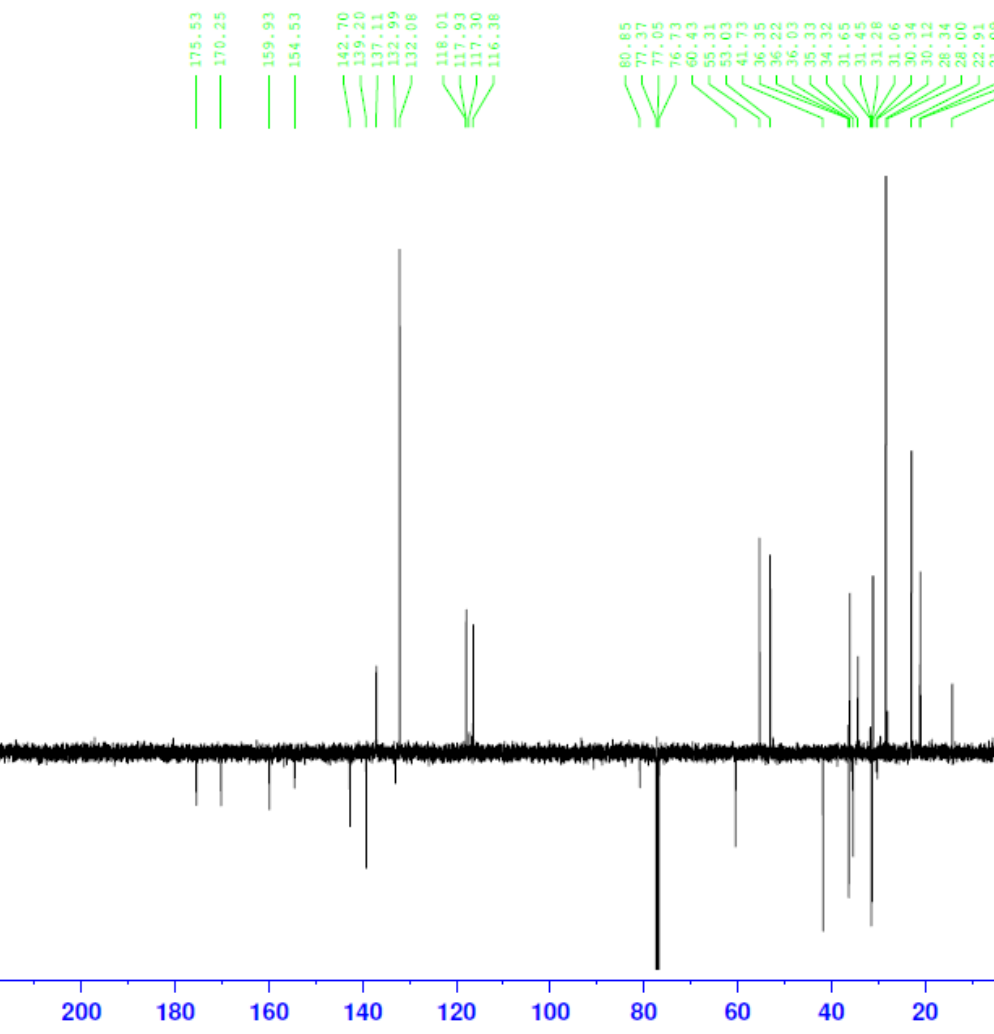

Current Data Parameters  
 NAME aet7-47-2  
 EXPNO 22  
 PROCNO 1

F2 - Acquisition Parameters  
 Date\_ 20111221  
 Time 19.39  
 INSTRUM DPX400  
 PROBHD 5 mm QNP 1H/13  
 PULPROG deptq\_135  
 TD 65536  
 SOLVENT CDCl3  
 NS 512  
 DS 4  
 SWH 23980.814 Hz  
 FIDRES 0.365918 Hz  
 AQ 1.3664756 sec  
 RG 16384  
 DW 20.850 usec  
 DE 6.00 usec  
 TE 294.2 K  
 CNST2 145.0000000  
 D1 2.00000000 sec  
 d2 0.00344828 sec  
 d11 0.03000000 sec  
 DELTA 0.00001019 sec

----- CHANNEL f1 -----  
 NUC1 13C  
 P1 8.00 usec  
 P2 16.00 usec  
 PL1 -2.60 dB  
 SFO1 100.6228300 MHz

----- CHANNEL f2 -----  
 CPDPRG2 waltz16  
 NUC2 1H  
 P3 10.00 usec  
 P4 20.00 usec  
 PCPD2 80.00 usec  
 PL2 -1.50 dB  
 PL12 17.50 dB  
 SFO2 400.1316000 MHz

F2 - Processing parameters  
 SI 32768  
 SF 100.6127690 MHz  
 WDW EM  
 SSB 0  
 LB 1.00 Hz  
 GB 0  
 PC 1.40

Current Data Parameters  
 NAME ant7-47-2  
 EXPNO 24  
 PROCNO 1

F2 - Acquisition Parameters  
 Date\_ 20111221  
 Time 20.00

INSTRUM spect  
 PROBRD 5 mm QNP 1H/13  
 PULPROG zgpg30  
 TD 1024  
 SOLVENT cdc13  
 NS 4  
 DS 16  
 SWH 3188.775 Hz  
 FIDRES 3.114038 Hz  
 AQ 0.1606132 sec  
 RG 4096  
 SW 156.800 usec  
 DE 6.00 usec  
 TE 294.2 K  
 CNST2 145.000000  
 d0 0.0000300 sec  
 d1 1.4620798 sec  
 d2 0.00344828 sec  
 d12 0.0002000 sec  
 d13 0.0000400 sec  
 d16 0.0002000 sec  
 DELTA1 0.0022428 sec  
 INO 0.0003000 sec

CHANNEL F1  
 NUC1 1H  
 P1 10.00 usec  
 P2 20.00 usec  
 PL1 -1.50 dB  
 SFO1 400.1316663 MHz

CHANNEL F2  
 CPDPRG2 gpgp  
 NUC2 13C  
 P3 8.00 usec  
 PCPD2 74.00 usec  
 PL2 -3.00 dB  
 PL12 18.00 dB  
 SFO2 100.6203140 MHz

GRADIENT CHANNEL  
 GPNAM1 SINE.100  
 GPNAM2 SINE.100  
 GPNAM3 SINE.100  
 GPE1 50.00 %  
 GPE2 30.00 %  
 GPE3 40.10 %  
 F16 1000.00 usec

F1 - Acquisition parameters  
 ND0 2  
 TD 128  
 SFO1 100.6203 MHz  
 FIDRES 130.208228 Hz  
 SW 145.439 ppm  
 PRMODE QF

F2 - Processing parameters  
 SI 1024  
 SF 400.1300336 MHz  
 WDW QSINE  
 SSB 2  
 LB 0.00 Hz  
 GB 0  
 PC 1.40

F1 - Processing parameters  
 SI 1024  
 WC2 QF  
 SF 100.6127690 MHz  
 WDW QSINE  
 SSB 2  
 LB 0.00 Hz  
 GB 0

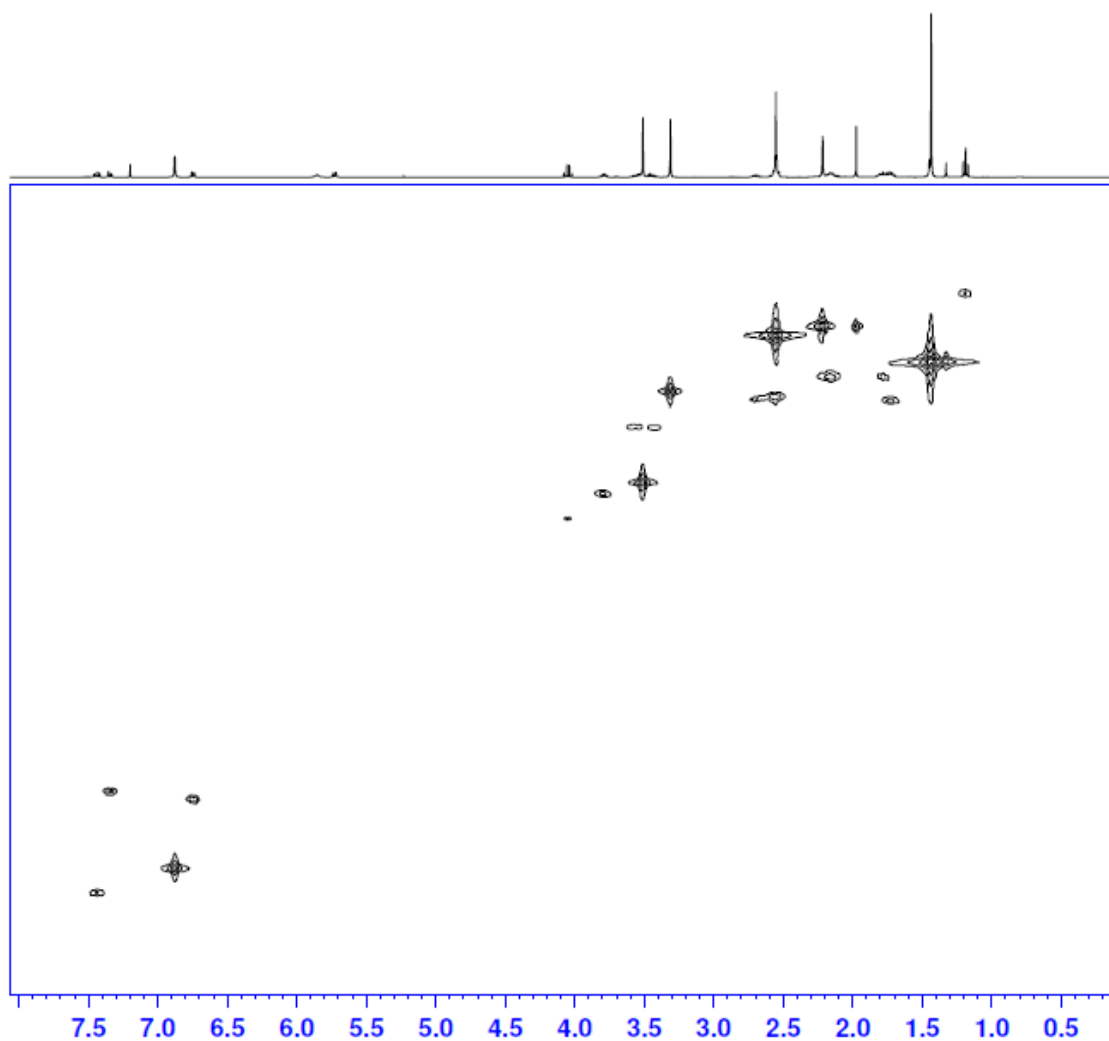

Methyl (S)-3-((1*r*\*,3*R*\*)-3-(2-(6-(methylamino)pyridin-2-yl)ethyl)cyclobutane-1-carboxamido)-2-

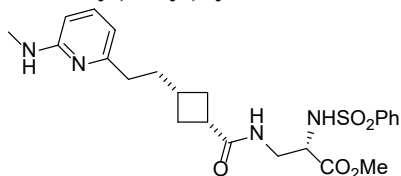

(phenylsulfonamido)propanoate [Compound 53]

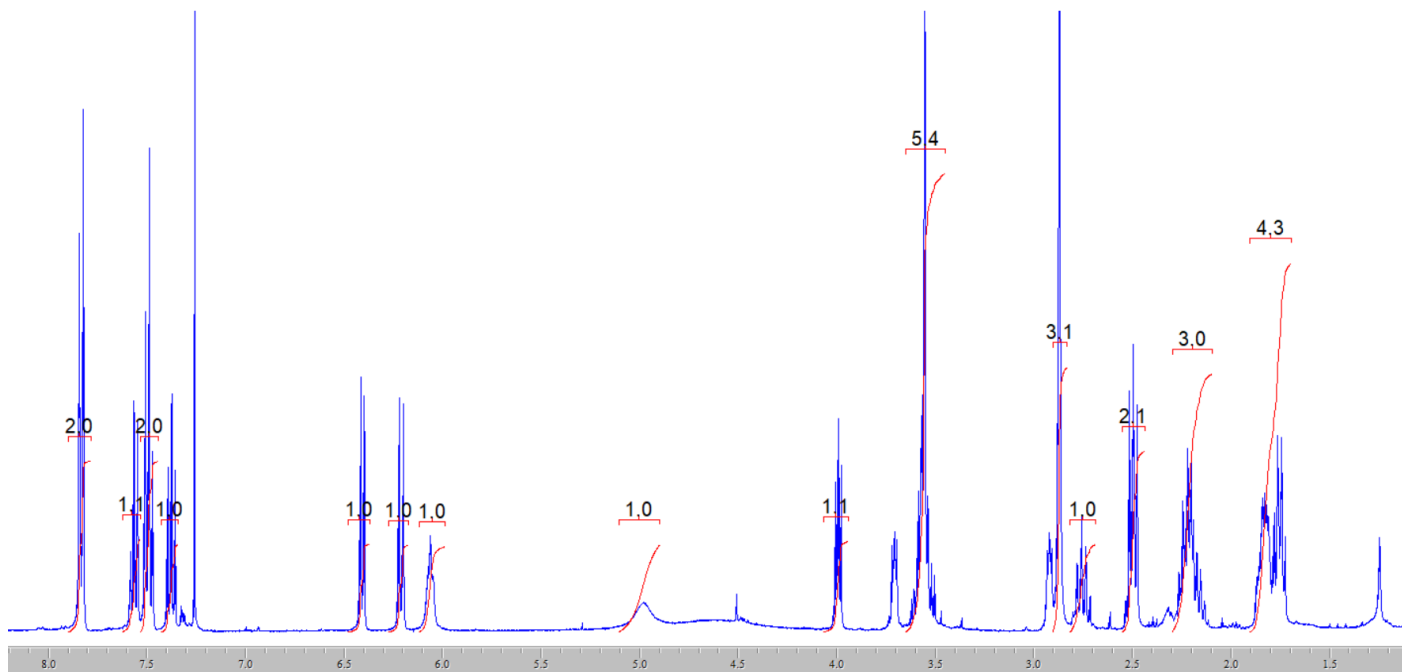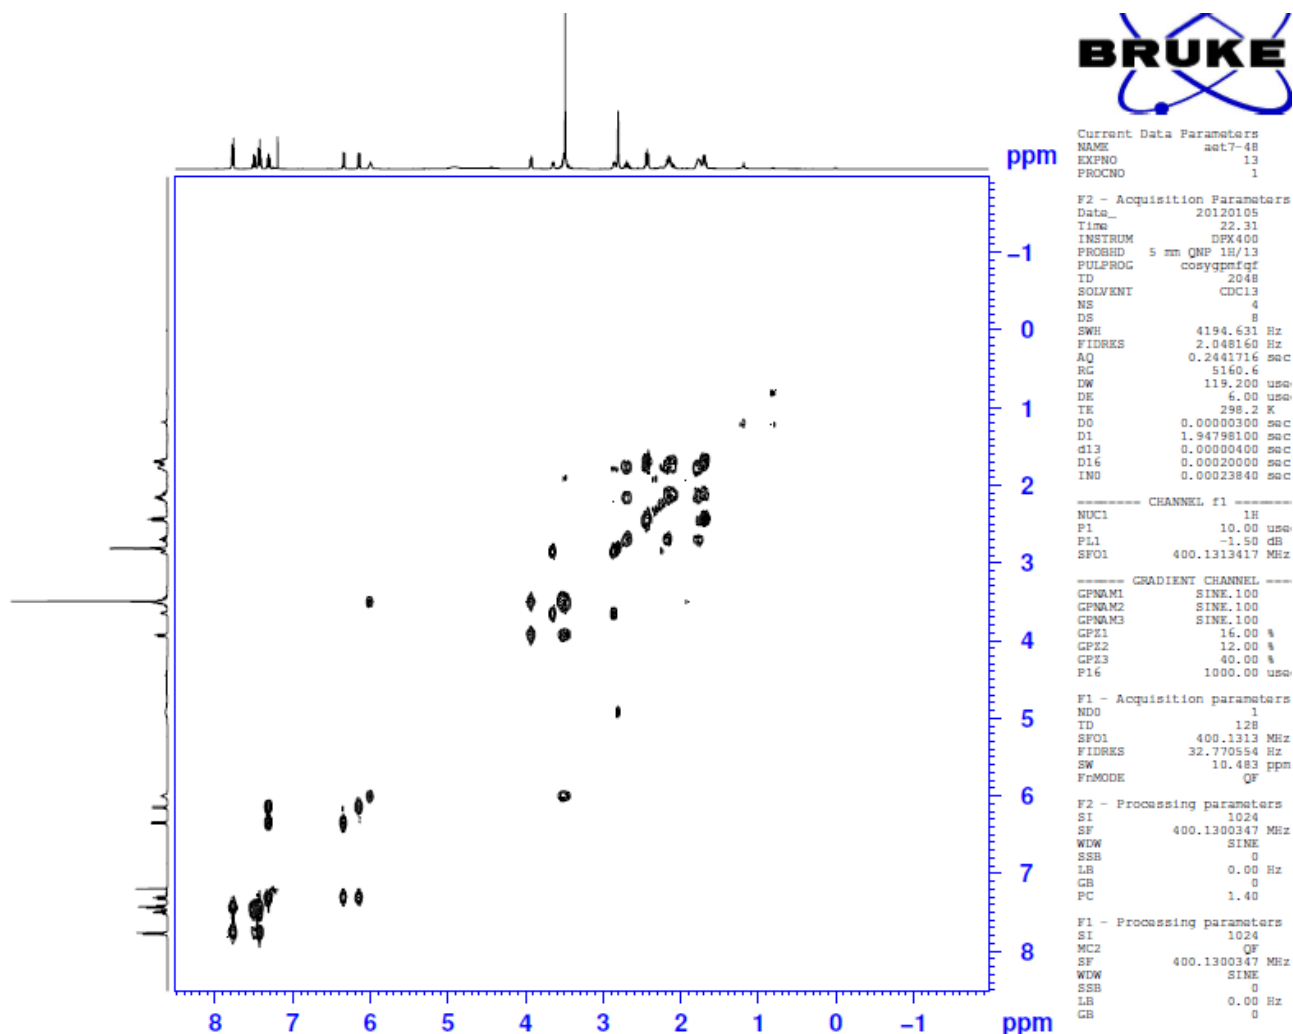

aet7-48

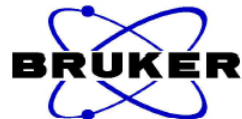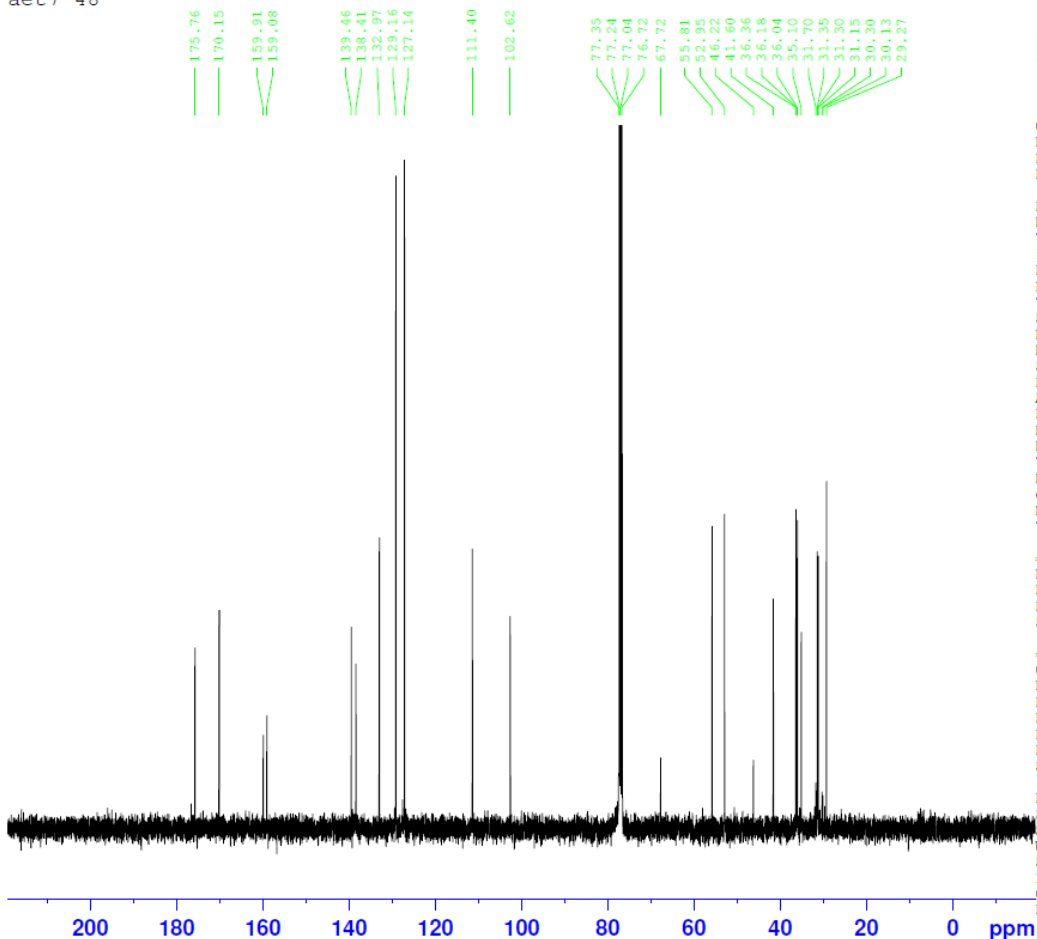

Current Data Parameters  
 NAME aet7-48  
 EXPNO 11  
 PROCNO 1

F2 - Acquisition Parameters  
 Date\_ 20120105  
 Time 22.00  
 INSTRUM DFX400  
 PROBHD 5 mm QNP 1H/13  
 PULPROG zgpg30  
 TD 65536  
 SOLVENT CDCl3  
 NS 1024  
 DS 4  
 SWH 23980.814 Hz  
 FIDRES 0.365918 Hz  
 AQ 1.3664756 sec  
 RG 912.3  
 DW 20.850 usec  
 DE 6.00 usec  
 TE 298.2 K  
 D1 2.00000000 sec  
 d11 0.03000000 sec  
 DELTA 1.89999998 sec  
 TDO 1

==== CHANNEL f1 =====  
 NUC1 13C  
 P1 8.00 usec  
 PL1 -2.60 dB  
 SFO1 100.6228298 MHz

==== CHANNEL f2 =====  
 CPDPRG2 waltz16  
 NUC2 1H  
 PCPD2 80.00 usec  
 PL2 -1.50 dB  
 PL12 17.50 dB  
 PL13 17.50 dB  
 SFO2 400.1316005 MHz

F2 - Processing parameters  
 SI 32768  
 SF 100.6127690 MHz  
 WDW EM  
 SSB 0  
 LB 1.00 Hz  
 GB 0  
 PC 1.40

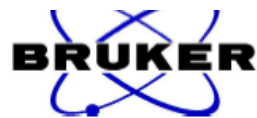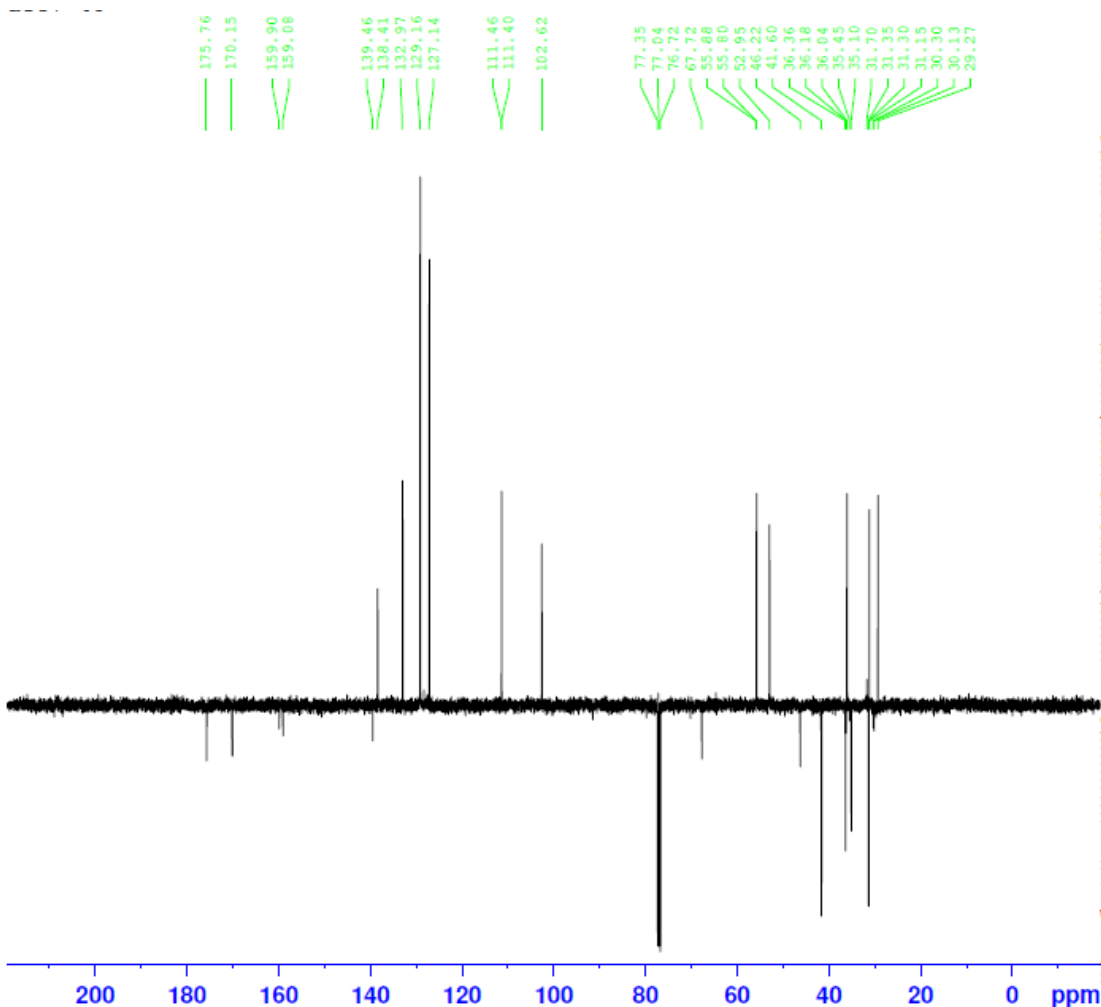

Current Data Parameters  
 NAME aet7-48  
 EXPNO 12  
 PROCNO 1

F2 - Acquisition Parameters  
 Date\_ 20120105  
 Time 22.30  
 INSTRUM DFX400  
 PROBHD 5 mm QNP 1H/13  
 PULPROG deptq\_135  
 TD 65536  
 SOLVENT CDCl3  
 NS 512  
 DS 4  
 SWH 23980.814 Hz  
 FIDRES 0.365918 Hz  
 AQ 1.3664756 sec  
 RG 18390.4  
 DW 20.850 usec  
 DE 6.00 usec  
 TE 298.2 K  
 CNST2 145.00000000  
 D1 2.00000000 sec  
 d2 0.00344828 sec  
 D11 0.03000000 sec  
 DELTA 0.00001019 sec

==== CHANNEL f1 =====  
 NUC1 13C  
 P1 8.00 usec  
 P2 16.00 usec  
 PL1 -2.60 dB  
 SFO1 100.6228300 MHz

==== CHANNEL f2 =====  
 CPDPRG2 waltz16  
 NUC2 1H  
 P3 10.00 usec  
 P4 20.00 usec  
 PCPD2 80.00 usec  
 PL2 -1.50 dB  
 PL12 17.50 dB  
 SFO2 400.1316000 MHz

F2 - Processing parameters  
 SI 32768  
 SF 100.6127690 MHz  
 WDW EM  
 SSB 0  
 LB 1.00 Hz  
 GB 0  
 PC 1.40



Current Data Parameters  
 NAME test7-48  
 EXPRNO 14  
 PROCNO 1

F2 - Acquisition Parameters  
 Date\_ 20120105  
 Time 22.51

INSTRUM spect  
 PULPROG zgpg30  
 TD 1024  
 SOLVENT cdc13  
 NS 4  
 DS 16  
 SWH 4194.631 Hz  
 FIDRES 4.096319 Hz  
 AQ 0.1221108 sec  
 RG 6502  
 SW 119.200 usec  
 DE 6.00 usec  
 TK 298.2 K  
 CNST2 145.0000000  
 d0 0.0000300 usec  
 d1 1.8952004 usec  
 d2 0.00344828 usec  
 d12 0.00002000 usec  
 d13 0.00004000 usec  
 d16 0.00020000 usec  
 DELTA1 0.0022428 usec  
 INU 0.00003000 usec

CHANNEL F1  
 NUC1 1H  
 P1 10.00 usec  
 P2 20.00 usec  
 PL1 -1.50 dB  
 SFO1 400.1313417 MHz

CHANNEL F2  
 CPDPRG2 gpgp  
 NUC2 13C  
 P3 8.00 usec  
 PCPD2 74.00 usec  
 PL2 -3.00 dB  
 PL3 18.00 dB  
 SFO2 100.6203140 MHz

GRADIENT CHANNEL  
 GPNAM1 SINE.100  
 GPNAM2 SINE.100  
 GPNAM3 SINE.100  
 GFS1 50.00 %  
 GFS2 30.00 %  
 GFS3 40.10 %  
 F16 1000.00 usec

F1 - Acquisition parameters  
 NDO 2  
 TD 128  
 SFO1 100.6203 MHz  
 FIDRES 130.208328 Hz  
 SW 163.639 ppm  
 PRMODE QF

F2 - Processing parameters  
 SI 1024  
 SF 400.1300347 MHz  
 WDW QSINE  
 SSB 2  
 LB 0.00 Hz  
 GB 0  
 PC 1.40

F1 - Processing parameters  
 SI 1024  
 MC2 QF  
 SF 100.617690 MHz  
 WDW QSINE  
 SSB 2  
 LB 0.00 Hz  
 GB 0

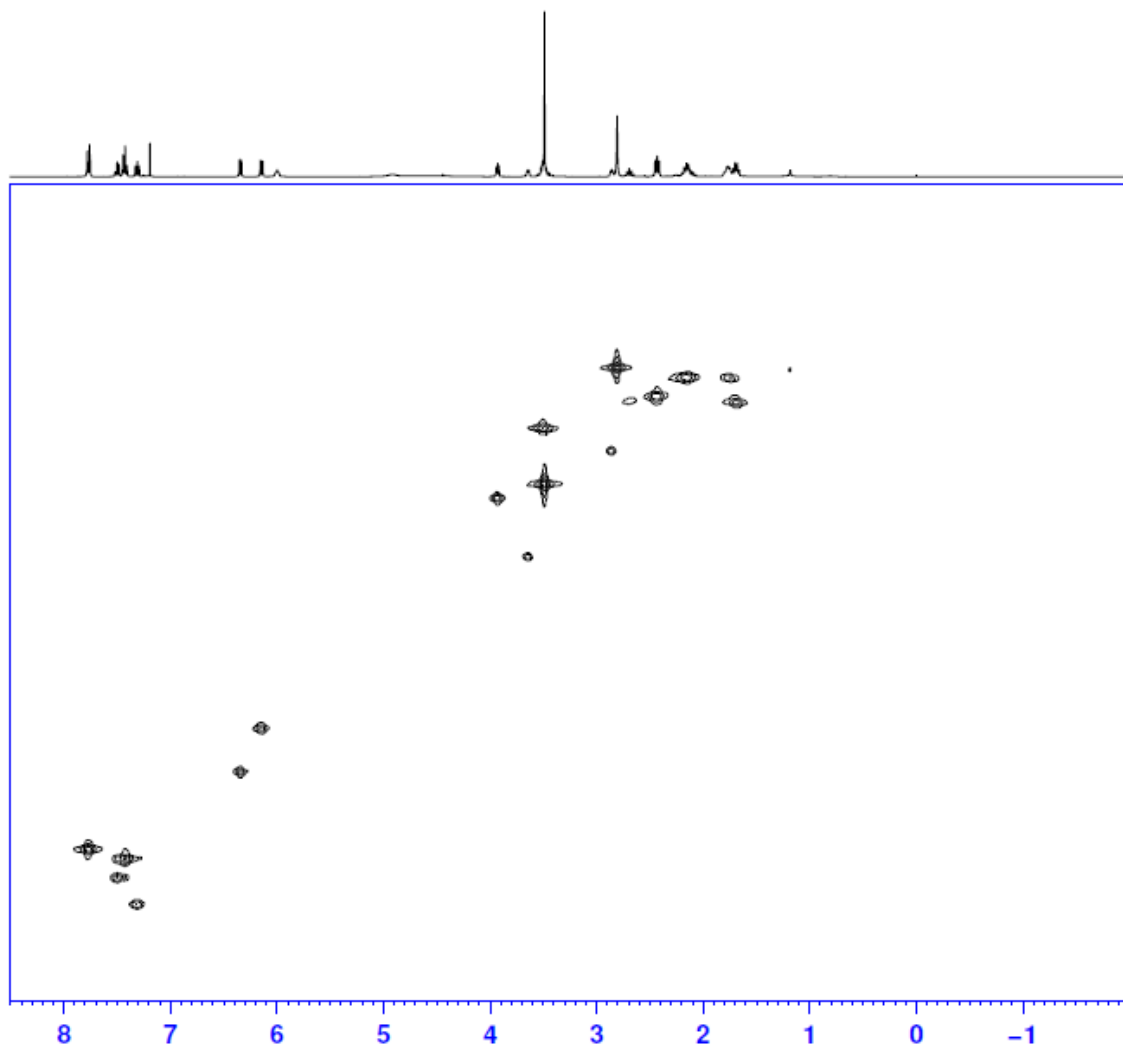

Methyl (S)-3-((1r\*,3R\*)-3-(2-(6-(methylamino)pyridin-2-yl)ethyl)cyclobutane-1-carboxamido)-2-(2,4,6-

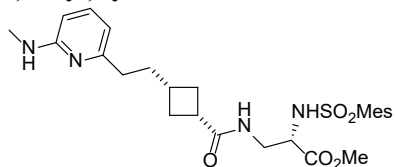

trimethylphenylsulfonamido)propanoate [Compound 54]

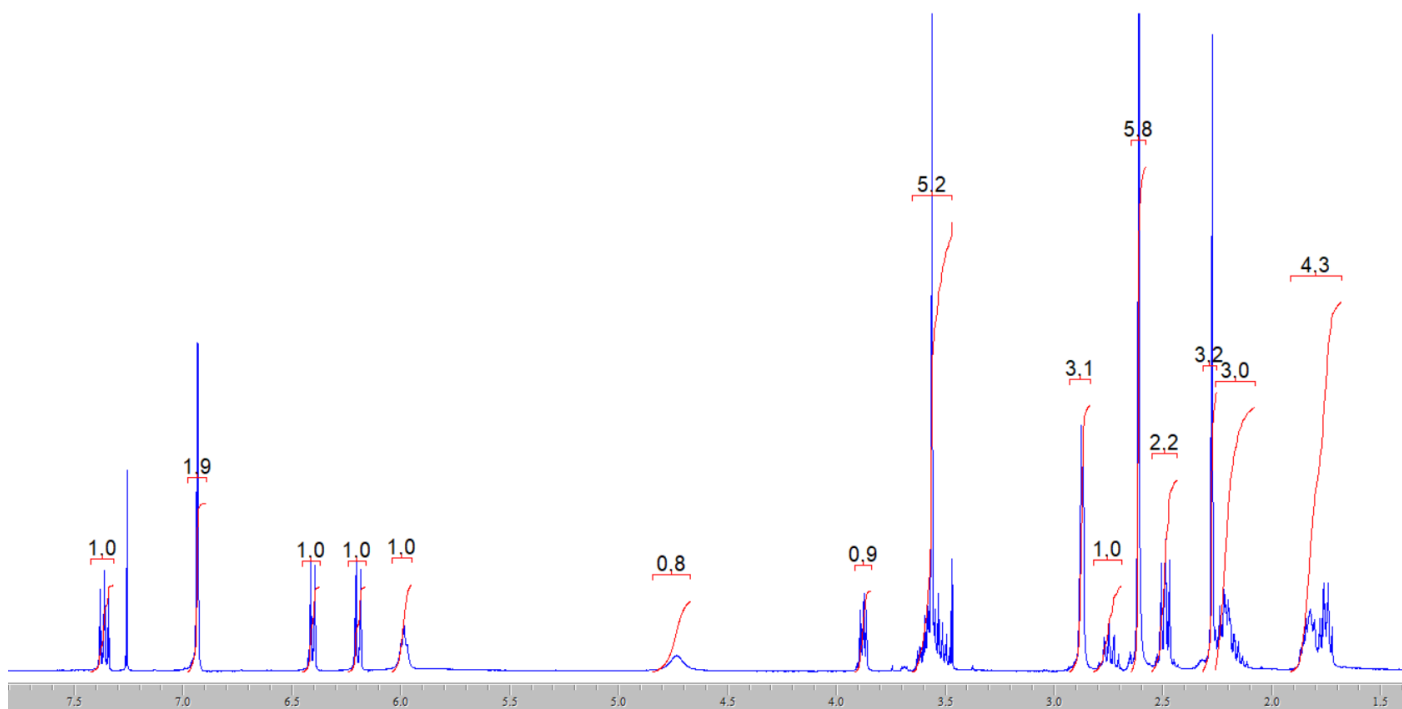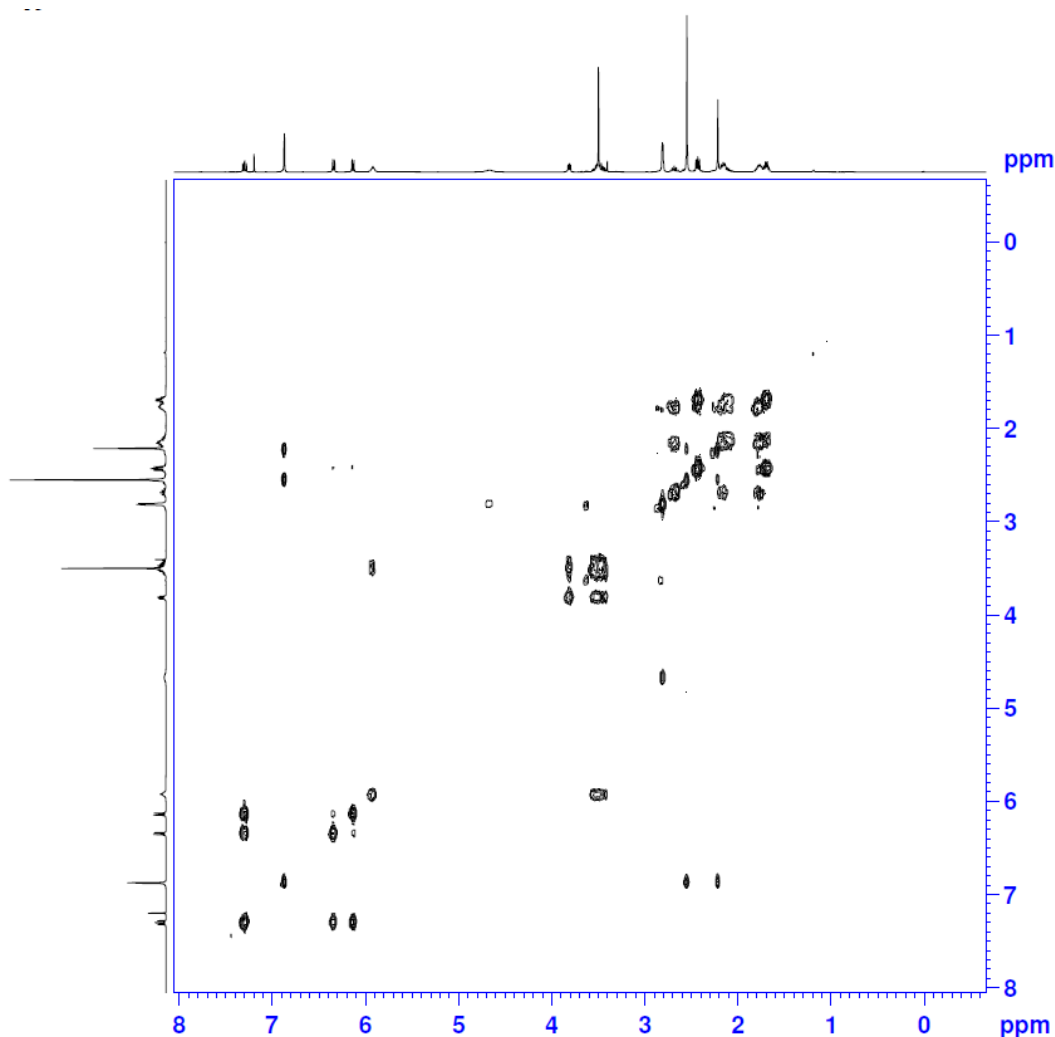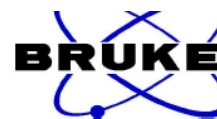

Current Data Parameters  
NAME set7-49  
EXPNO 13  
PROCNO 1

F2 - Acquisition Parameter:  
Date\_ 20120106  
Time 0.39  
INSIRUM DFX400  
PROBHD 5 mm QNP 1H/13  
PULPROG cosygpmfzf  
TD 2048  
SOLVENT CDCl3  
NS 4  
DS 8  
SWH 3491.620 Hz  
FIDRES 1.704893 Hz  
AQ 0.2933236 sec  
RG 7298.2  
DW 143.200 usec  
DE 6.00 usec  
TE 298.2 K  
DO 0.00000300 sec  
D1 1.8988299 sec  
d13 0.00000400 sec  
D16 0.00020000 sec  
IN0 0.00028640 sec

----- CHANNEL f1 -----  
NUC1 1H  
P1 10.00 usec  
PL1 -1.50 dB  
SFO1 400.1315125 MHz

----- GRADIENT CHANNEL -----  
GPNAM1 SINE.100  
GPNAM2 SINE.100  
GPNAM3 SINE.100  
GPZ1 16.00 %  
GPZ2 12.00 %  
GPZ3 40.00 %  
P16 1000.00 usec

F1 - Acquisition parameter:  
ND0 1  
TD 128  
SFO1 400.1315 MHz  
FIDRES 27.278282 Hz  
SW 8.726 ppm  
FhMODE QF

F2 - Processing parameters  
SI 1024  
SF 400.1300346 MHz  
WDW SINE  
SSB 0  
LB 0.00 Hz  
GB 0  
PC 1.40

F1 - Processing parameters  
SI 1024  
MC2 QF  
SF 400.1300346 MHz  
WDW SINE  
SSB 0  
LB 0.00 Hz  
GB 0

aet7-49

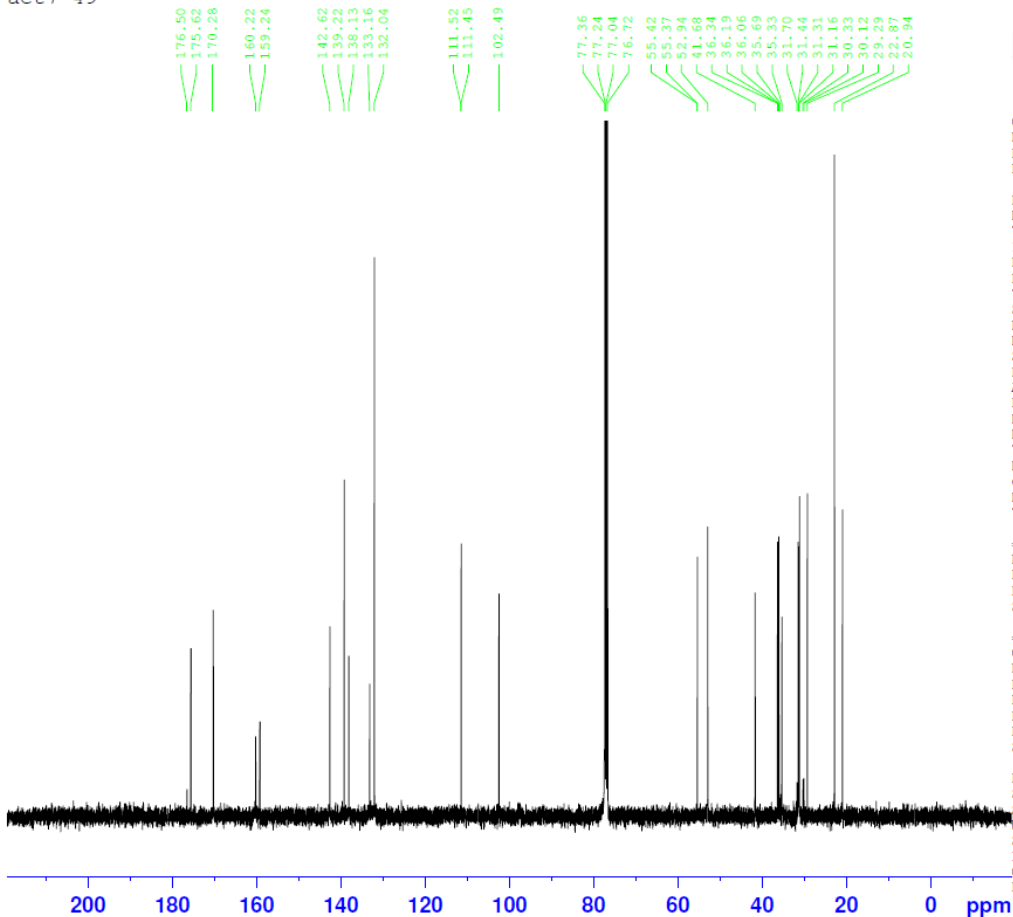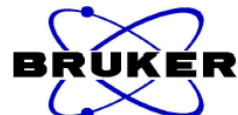

Current Data Parameters  
 NAME aet7-49  
 EXPNO 11  
 PROCNO 1

F2 - Acquisition Parameters  
 Date\_ 20120106  
 Time 0.08  
 INSTRUM DPX400  
 PROBHD 5 mm QNP 1H/13  
 PULPROG zgpg30  
 TD 65536  
 SOLVENT CDCl3  
 NS 1024  
 DS 4  
 SWH 23980.814 Hz  
 FIDRES 0.365918 Hz  
 AQ 1.3664756 sec  
 RG 1824.6  
 DW 20.850 usec  
 DE 6.00 usec  
 TE 298.2 K  
 D1 2.00000000 sec  
 d11 0.03000000 sec  
 DELTA 1.89999998 sec  
 TD0 1

===== CHANNEL f1 =====  
 NUC1 13C  
 P1 8.00 usec  
 PL1 -2.60 dB  
 SFO1 100.6228298 MHz

===== CHANNEL f2 =====  
 CPDPRG2 waltz16  
 NUC2 1H  
 PCPD2 80.00 usec  
 PL2 -1.50 dB  
 PL12 17.50 dB  
 PL13 17.50 dB  
 SFO2 400.1316005 MHz

F2 - Processing parameters  
 SI 32768  
 SF 100.6127690 MHz  
 WDW EM  
 SSB 0  
 LB 1.00 Hz  
 GB 0  
 PC 1.40

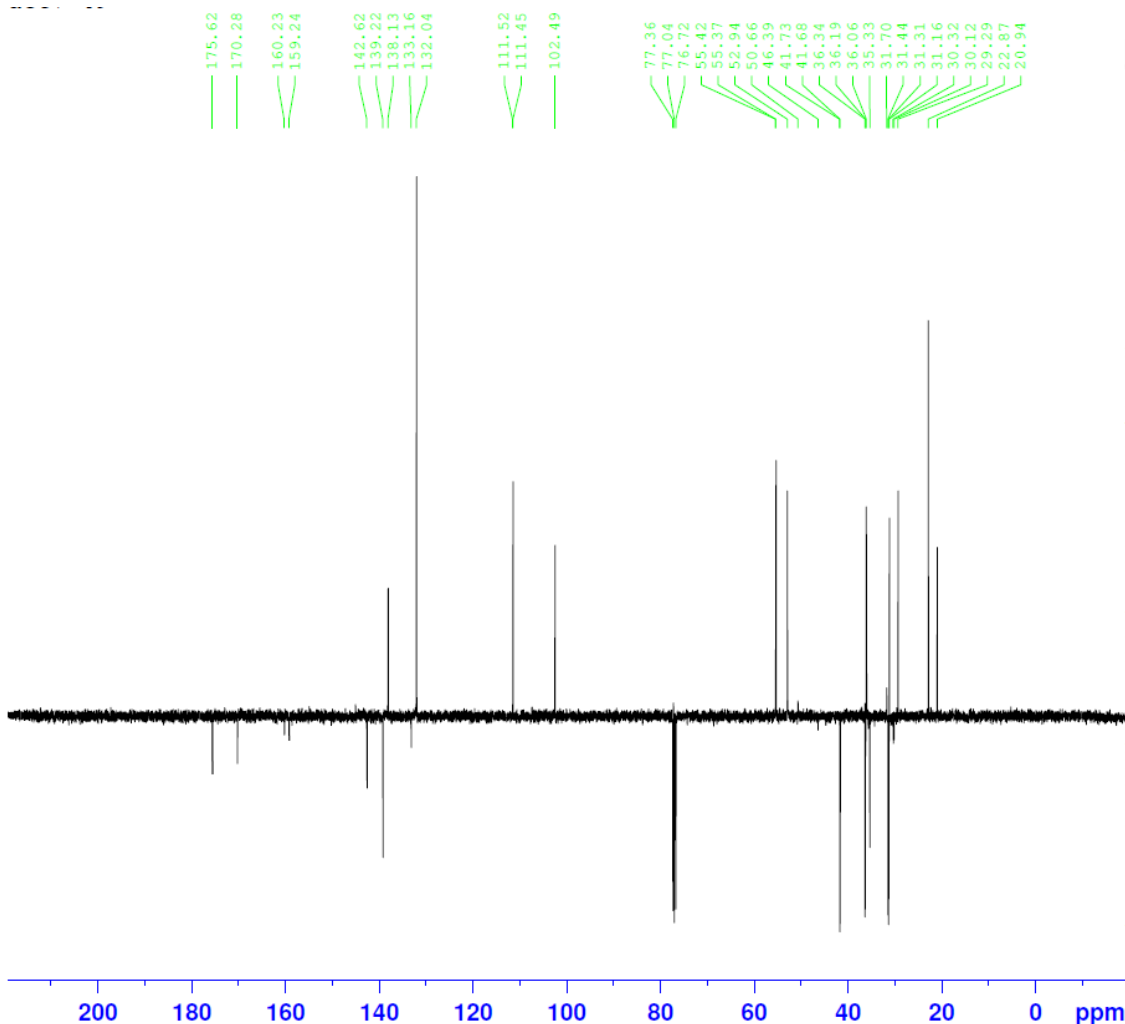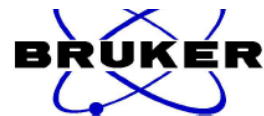

Current Data Parameters  
 NAME aet7-49  
 EXPNO 12  
 PROCNO 1

F2 - Acquisition Parameters  
 Date\_ 20120106  
 Time 0.38  
 INSTRUM DPX400  
 PROBHD 5 mm QNP 1H/13  
 PULPROG deptq\_135  
 TD 65536  
 SOLVENT CDCl3  
 NS 512  
 DS 4  
 SWH 23980.814 Hz  
 FIDRES 0.365918 Hz  
 AQ 1.3664756 sec  
 RG 11585.2  
 DW 20.850 usec  
 DE 6.00 usec  
 TE 298.2 K  
 CNST2 145.0000000  
 D1 2.00000000 sec  
 d2 0.00344828 sec  
 D11 0.03000000 sec  
 DELTA 0.00001019 sec

===== CHANNEL f1 =====  
 NUC1 13C  
 P1 8.00 usec  
 P2 16.00 usec  
 PL1 -2.60 dB  
 SFO1 100.6228300 MHz

===== CHANNEL f2 =====  
 CPDPRG2 waltz16  
 NUC2 1H  
 P3 10.00 usec  
 P4 20.00 usec  
 PCPD2 80.00 usec  
 PL2 -1.50 dB  
 PL12 17.50 dB  
 SFO2 400.1316000 MHz

F2 - Processing parameters  
 SI 32768  
 SF 100.6127690 MHz  
 WDW EM  
 SSB 0  
 LB 1.00 Hz  
 GB 0  
 PC 1.40

Current Data Parameters  
 NAME act7-49  
 EXPNO 14  
 PRGNO 1

F2 - Acquisition Parameters  
 Date\_ 20120106  
 Time 0.59

INSTRUM Dpx400  
 PROBRD 5 mm QNP 1H/13  
 PULPROG hmqcpgpgf  
 TD 1024  
 SOLVENT cdcl3  
 NS 4  
 DS 4  
 SWH 3491.620 Hz  
 FIDRES 3.409785 Hz  
 AQ 0.1466868 sec  
 RG 26008  
 DE 143.200 usec  
 QE 6.00 usec  
 TK 298.2 K  
 CNST2 145.0000000  
 d0 0.00000300 sec  
 d1 1.48054397 sec  
 d2 0.00344828 sec  
 d12 0.00002000 sec  
 d13 0.00000400 sec  
 d14 0.00020000 sec  
 DELTA1 0.0022428 sec  
 INO 0.00003000 sec

==== CHANNEL f1 =====  
 NUC1 1H  
 P1 10.00 usec  
 p2 20.00 usec  
 PL1 -1.50 dB  
 SFO1 400.1315125 MHz

==== CHANNEL f2 =====  
 CPDPRG2 garp  
 NUC2 13C  
 P3 8.00 usec  
 PCD2 74.00 usec  
 PL2 -3.00 dB  
 PL12 18.00 dB  
 SFO2 100.6203140 MHz

==== GRADIENT CHANNEL =====  
 GPNAM1 SINE.100  
 GPNAM2 SINE.100  
 GPNAM3 SINE.100  
 GP21 50.00 %  
 GP22 30.00 %  
 GP23 40.10 %  
 P16 1000.00 usec

F1 - Acquisition parameters  
 ND0 2  
 TD 128  
 SFO1 100.6203 MHz  
 FIDRES 130.208328 Hz  
 SW 165.639 ppm  
 FRMODE QF

F2 - Processing parameters  
 SI 1024  
 SF 400.1300346 MHz  
 WDW QSINE  
 SSB 2  
 LB 0.00 Hz  
 GB 0  
 PC 1.40

F1 - Processing parameters  
 SI 1024  
 MC2 QF  
 SF 100.6127690 MHz  
 WDW QSINE  
 SSB 2  
 LB 0.00 Hz  
 GB 0

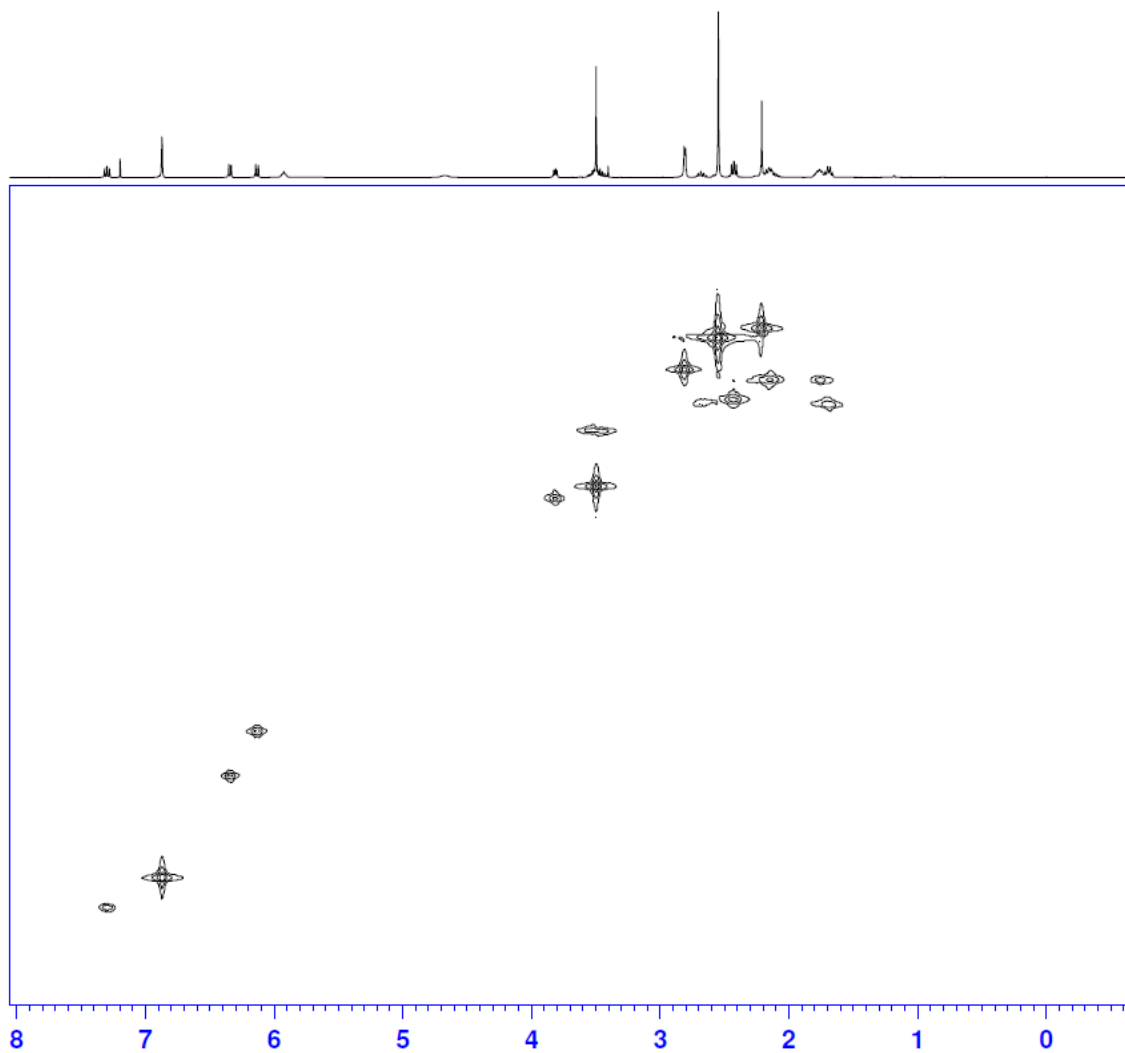

**(S)-3-((1*r*\*,3*R*\*)-3-(2-(6-(methylamino)pyridin-2-yl)ethyl)cyclobutane-1-carboxamido)-2-(2,4,6-**

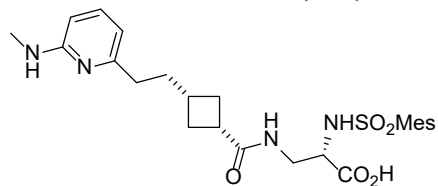

**trimethylphenylsulfonamido)propanoic acid [Compound 55]**

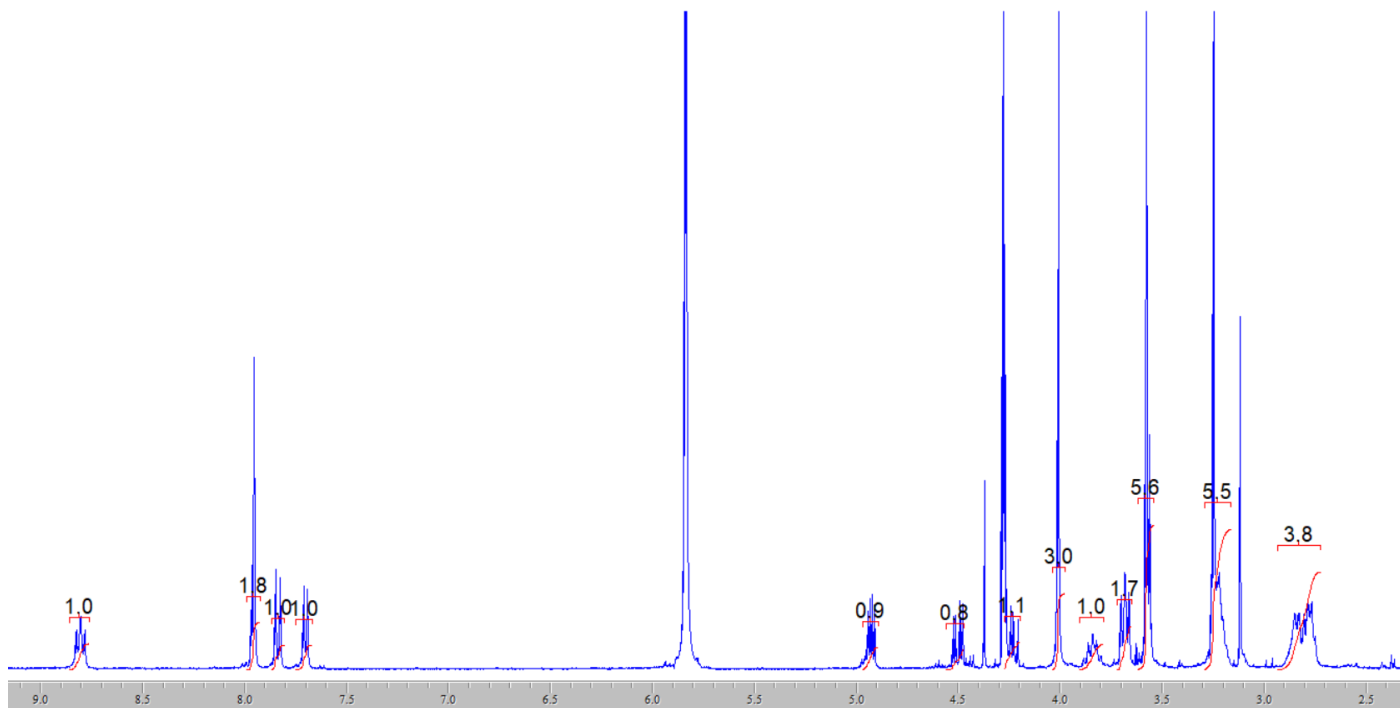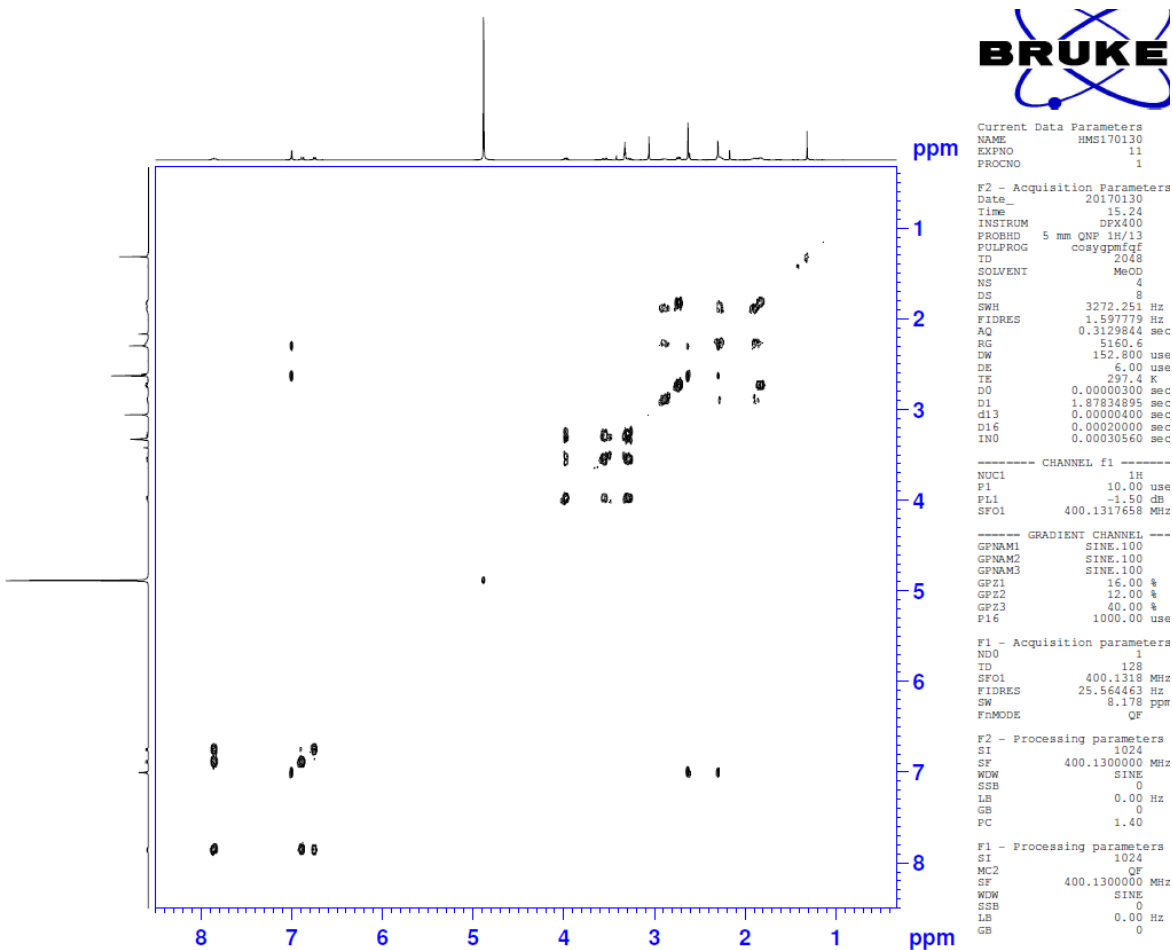

**BRUKER**

Current Data Parameters  
NAME HMS170130  
EXPNO 11  
PROCNO 1

F2 - Acquisition Parameters  
Date\_ 20170130  
Time 15.24  
INSTRUM DFX400  
PROBHD 5 mm QNP 1H/13  
PULPROG cosygmrgf  
ID 2048  
SOLVENT MeOD  
NS 4  
DS 8  
SWH 3272.251 Hz  
FIDRES 1.597779 Hz  
AQ 0.3129844 sec  
RG 5160.6  
DW 152.800 use  
DE 6.00 use  
TE 297.4 K  
D0 0.00000300 sec  
D1 1.87834895 sec  
d13 0.00000400 sec  
D16 0.00020000 sec  
IN0 0.00030560 sec

----- CHANNEL f1 -----  
NUC1 1H  
P1 10.00 use  
PL1 -1.50 dB  
SFO1 400.1317658 MHz

----- GRADIENT CHANNEL -----  
GPNAM1 SINE.100  
GPNAM2 SINE.100  
GPNAM3 SINE.100  
GPZ1 15.00 %  
GPZ2 12.00 %  
GPZ3 40.00 %  
P16 1000.00 use

F1 - Acquisition parameters  
ND0 1  
ID 128  
SFO1 400.1318 MHz  
FIDRES 25.564463 Hz  
SW 8.178 ppm  
FhMODE QF

F2 - Processing parameters  
SI 1024  
SF 400.1300000 MHz  
WDW SINE  
SSB 0  
LB 0.00 Hz  
GB 0  
PC 1.40

F1 - Processing parameters  
SI 1024  
MC2 QF  
SF 400.1300000 MHz  
WDW SINE  
SSB 0  
LB 0.00 Hz  
GB 0

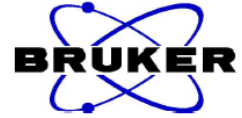

Current Data Parameters  
 NAME HMS170130  
 EXPNO 12  
 PROCNO 1

F2 - Acquisition Parameters  
 Date\_ 20170131  
 Time 6.23  
 INSTRUM DPX400  
 PROBHD 5 mm QNP 1H/13  
 PULPROG zgpg30  
 TD 65536  
 SOLVENT MeOD  
 NS 1024  
 DS 4  
 SWH 23980.814 Hz  
 FIDRES 0.365918 Hz  
 AQ 1.3664756 sec  
 RG 18390.4  
 DW 20.850 usec  
 DE 6.00 usec  
 TE 297.4 K  
 D1 2.00000000 sec  
 d11 0.03000000 sec  
 DELTA 1.89999998 sec  
 TD0 1

===== CHANNEL f1 =====  
 NUC1 13C  
 P1 9.00 usec  
 PL1 -2.60 dB  
 SFO1 100.6228298 MHz

===== CHANNEL f2 =====  
 CPDPRG2 waltz16  
 NUC2 1H  
 PCPD2 80.00 usec  
 PL2 -1.50 dB  
 PL12 17.50 dB  
 PL13 17.50 dB  
 SFO2 400.1316005 MHz

F2 - Processing parameters  
 SI 32768  
 SF 100.6126261 MHz  
 WDW EM  
 SSB 0  
 LB 1.00 Hz  
 GB 0  
 PC 1.40

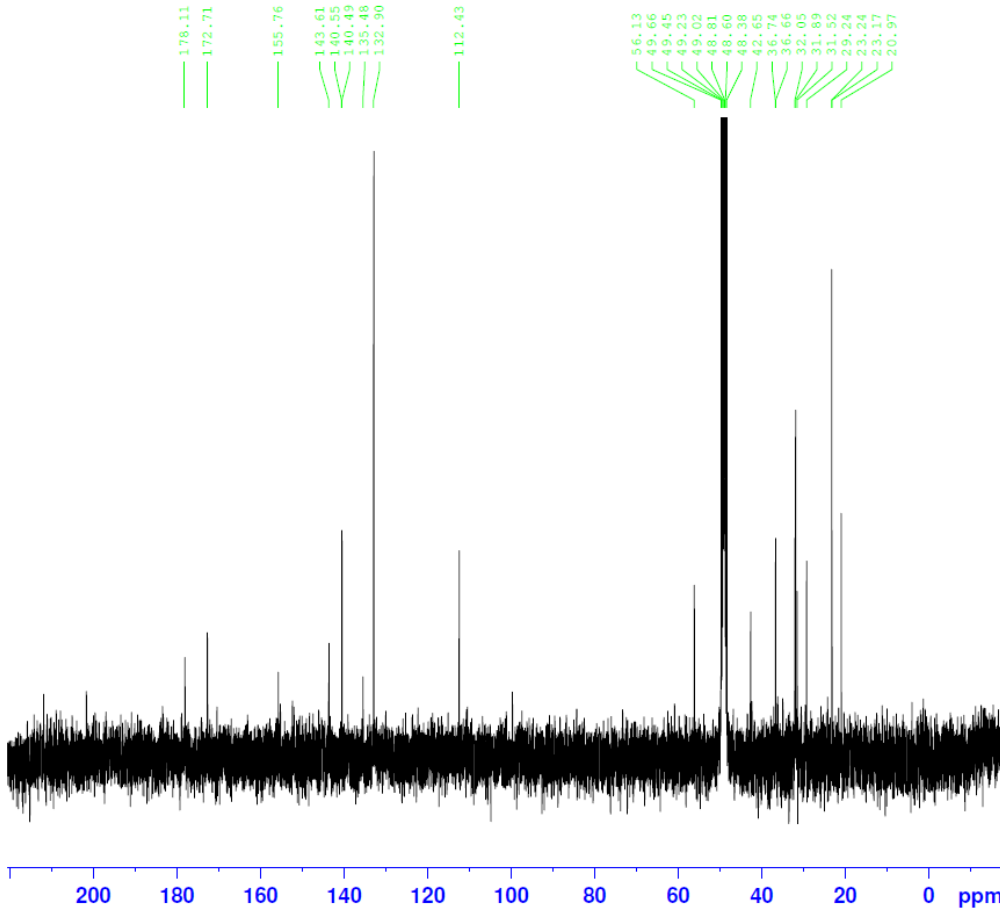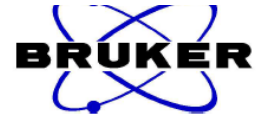

Current Data Parameters  
 NAME HMS170130  
 EXPNO 13  
 PROCNO 1

F2 - Acquisition Parameter:  
 Date\_ 20170131  
 Time 6.53  
 INSTRUM DPX400  
 PROBHD 5 mm QNP 1H/13  
 PULPROG deptg\_135  
 TD 65536  
 SOLVENT MeOD  
 NS 512  
 DS 4  
 SWH 23980.814 Hz  
 FIDRES 0.365918 Hz  
 AQ 1.3664756 sec  
 RG 11585.2  
 DW 20.850 usec  
 DE 6.00 usec  
 TE 297.4 K  
 CNST2 145.0000000  
 D1 2.00000000 sec  
 d2 0.00344828 sec  
 D11 0.03000000 sec  
 DELTA 0.00001146 sec

===== CHANNEL f1 =====  
 NUC1 13C  
 P1 9.00 usec  
 P2 18.00 usec  
 PL1 -2.60 dB  
 SFO1 100.6228300 MHz

===== CHANNEL f2 =====  
 CPDPRG2 waltz16  
 NUC2 1H  
 P3 10.00 usec  
 P4 20.00 usec  
 PCPD2 80.00 usec  
 PL2 -1.50 dB  
 PL12 17.50 dB  
 SFO2 400.1316000 MHz

F2 - Processing parameters  
 SI 32768  
 SF 100.6126261 MHz  
 WDW EM  
 SSB 0  
 LB 1.00 Hz  
 GB 0  
 PC 1.40

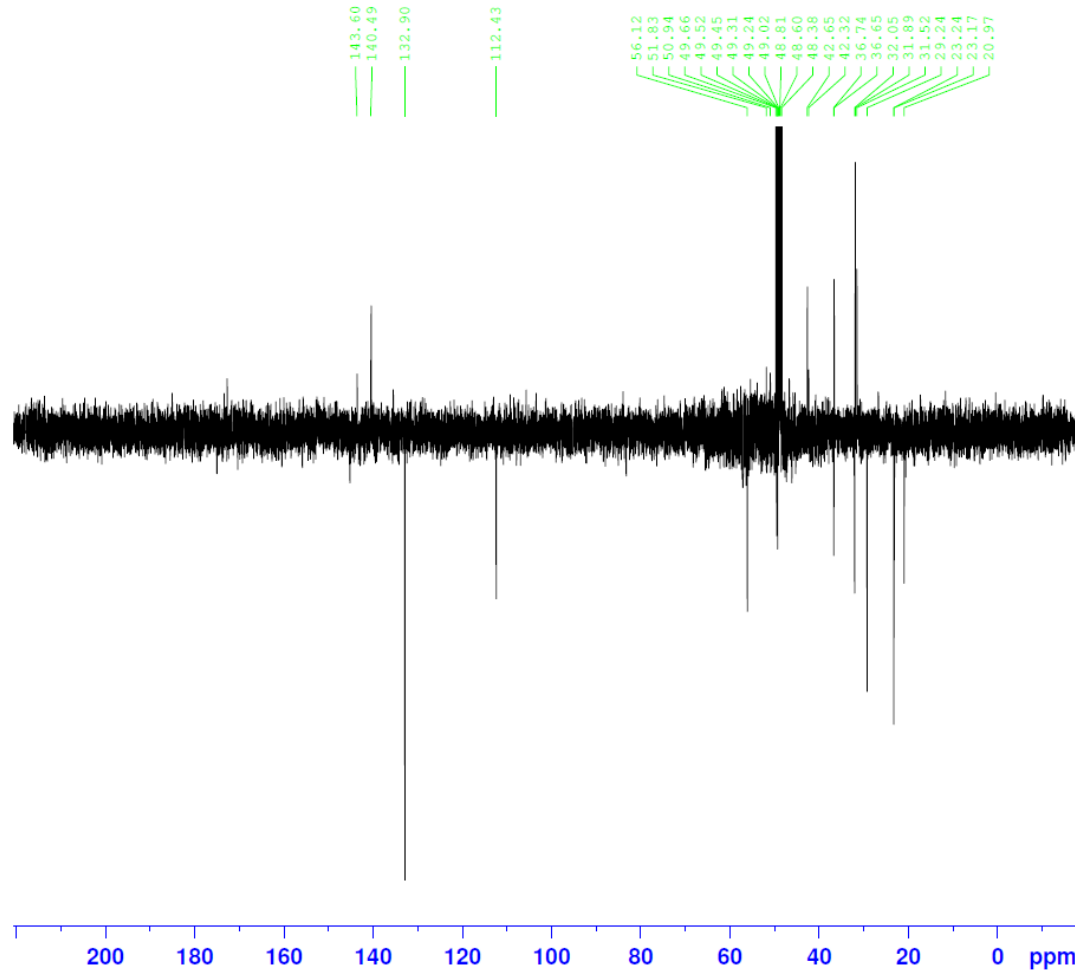

# Compound 4

aet9-11 MW=328?  
(DCM)/MeOH + NH<sub>4</sub>OAc

EPSRC National Centre Swansea  
LTQ Orbitrap XL

adam throup  
30/11/2012 15:29:41

BRASHE239-OV-HNESP #28-50 RT: 0.71-1.28 AV: 22 SM: 7G NL: 9.24E6  
T: FTMS + p NSI Full ms [120.00-2000.00]

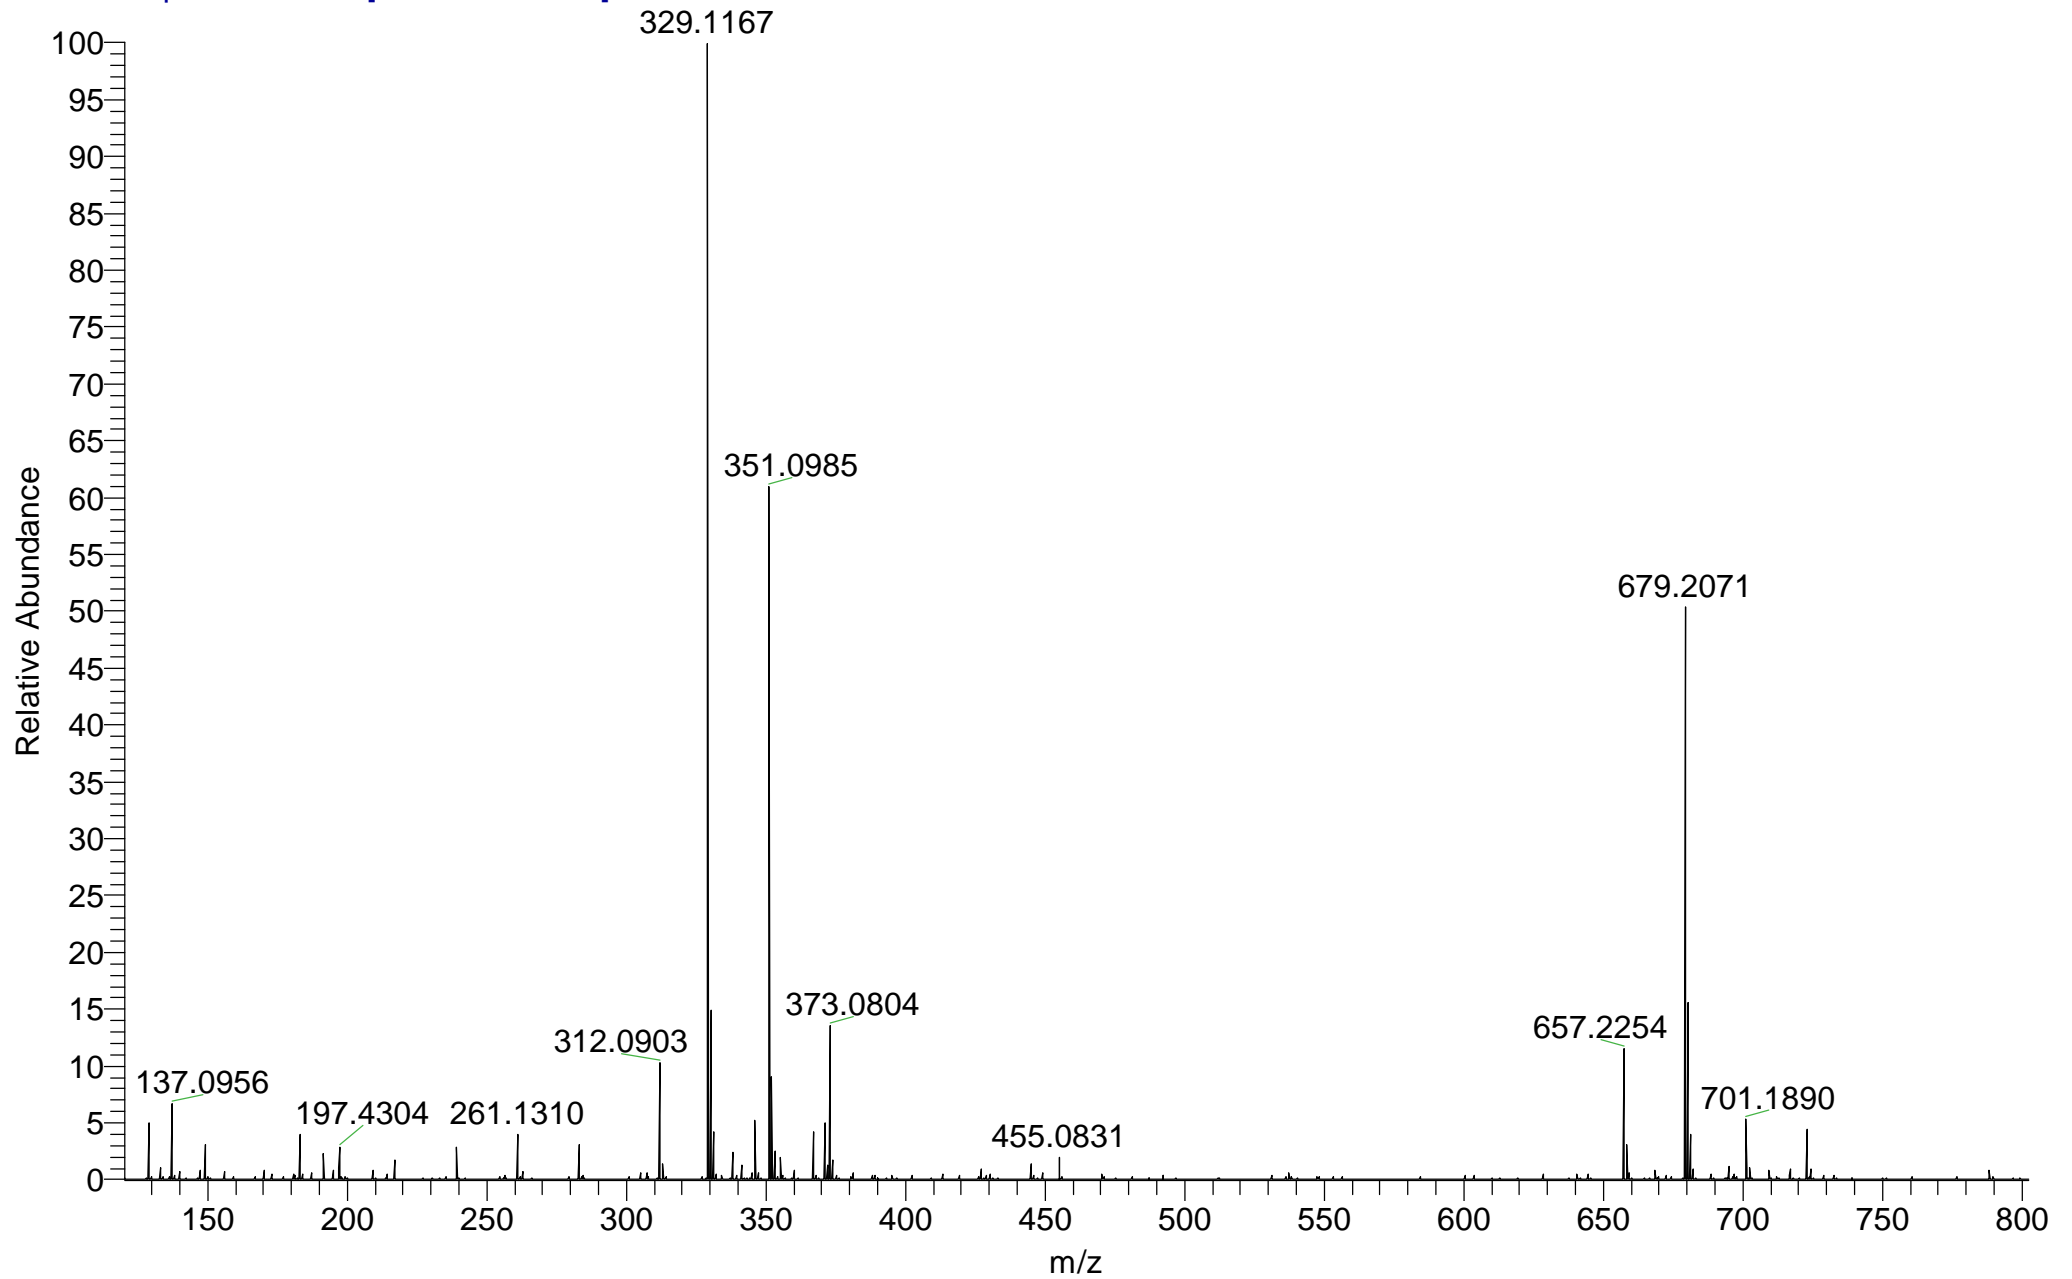

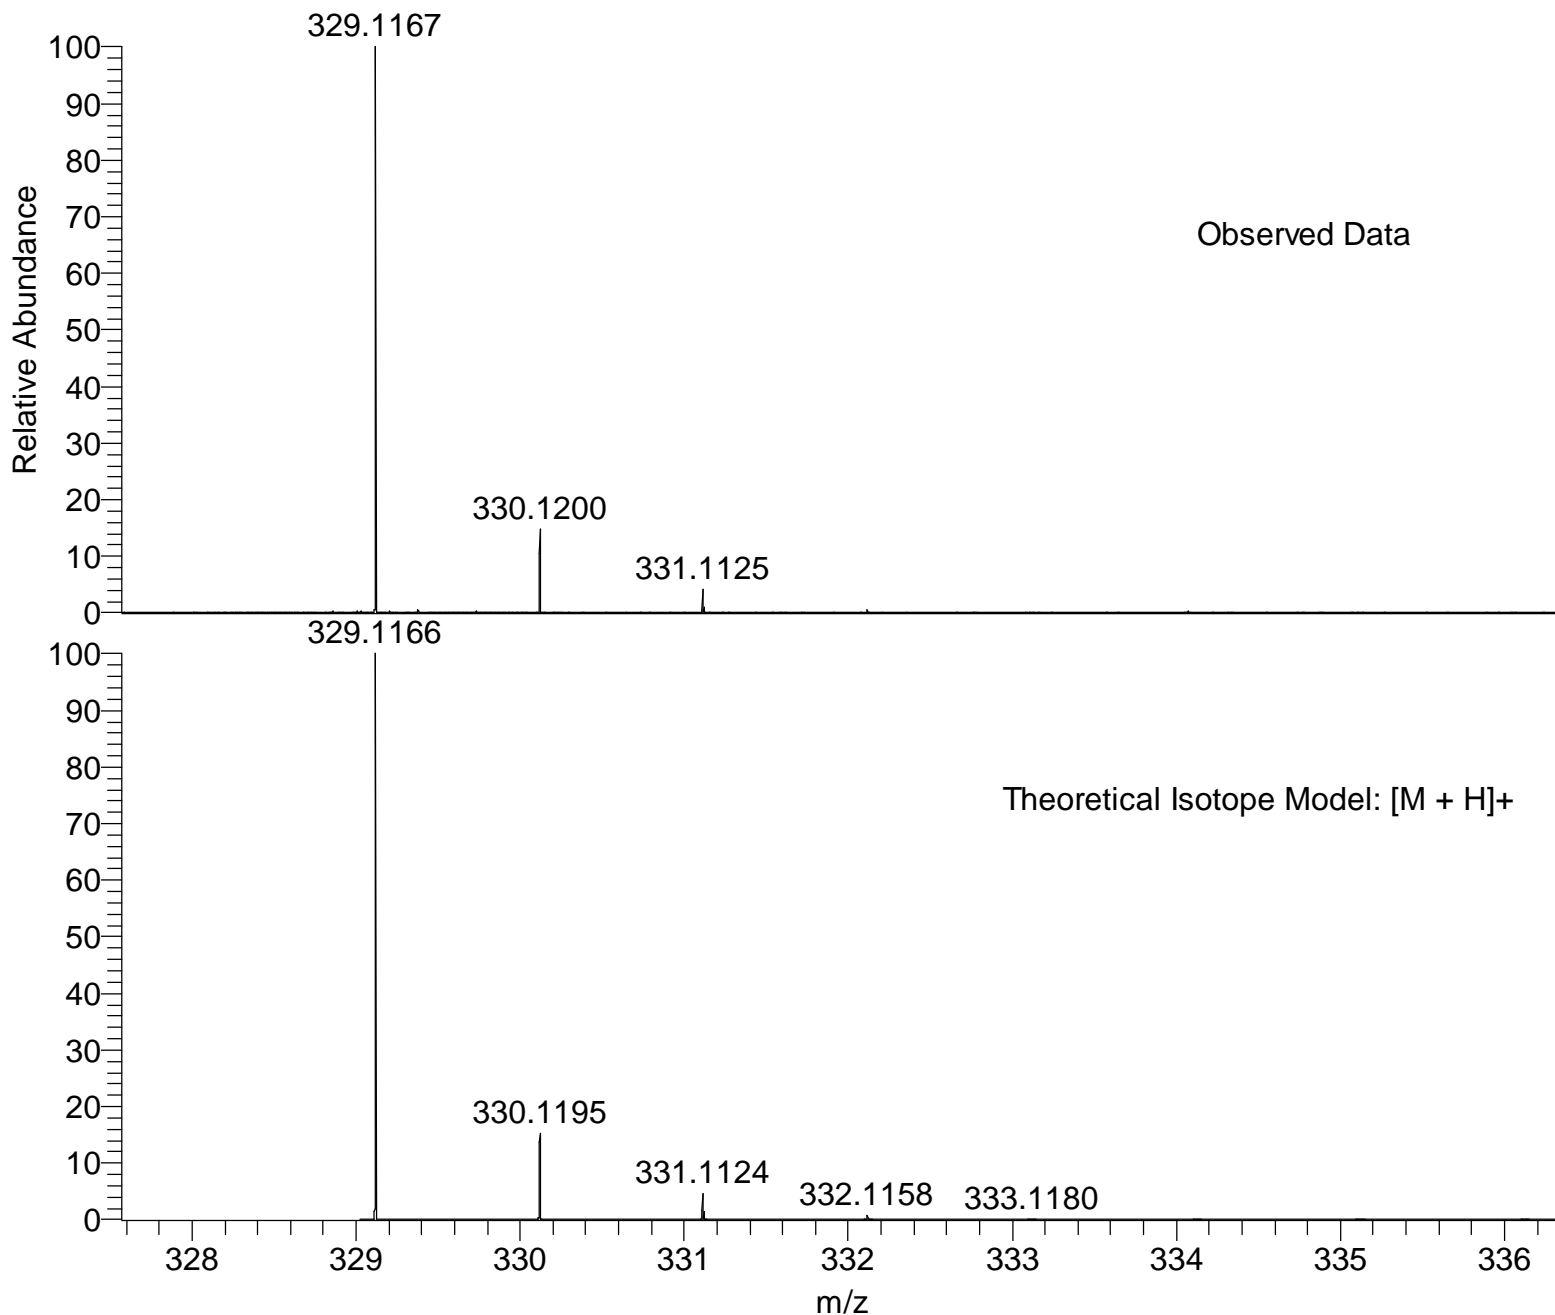

NL:  
9.24E6  
BRASHE239-OV-HNESP#28-  
50 RT: 0.71-1.28 AV: 22 T:  
FTMS + p NSI Full ms  
[120.00-2000.00]

NL:  
1.87E4  
C<sub>14</sub>H<sub>20</sub>N<sub>2</sub>O<sub>5</sub>SH:  
C<sub>14</sub>H<sub>21</sub>N<sub>2</sub>O<sub>5</sub>S<sub>1</sub>  
p (gss, s /p:40) Chrg 1  
R: 100000 Res .Pwr . @FWHM



Isotope:           Min. .. Max.  
 14 N               0....12  
 16 O               0....15  
 12 C               0....50  
 1 H                0....65  
 23 Na              0....0  
 32 S               0....4

Tolerance Window:           +- 5.00 ppm  
 Db/Ring Equiv: -3.. 100       N-Rule: Do not use  
 Fits:                100        Charge: 1

| Mass     | Theoretical<br>Mass | Delta<br>[ppm] | RDB  | Composition                                                                  |
|----------|---------------------|----------------|------|------------------------------------------------------------------------------|
| 329.1167 | 329.1166            | 0.4            | 5.5  | C <sub>14</sub> H <sub>21</sub> O <sub>5</sub> N <sub>2</sub> S <sub>1</sub> |
|          | 329.1166            | 0.4            | 11.0 | C <sub>13</sub> H <sub>15</sub> N <sub>9</sub> S <sub>1</sub>                |
|          | 329.1164            | 0.9            | -3.0 | C <sub>7</sub> H <sub>23</sub> O <sub>13</sub> N <sub>1</sub>                |
|          | 329.1164            | 1.0            | 2.5  | C <sub>6</sub> H <sub>17</sub> O <sub>8</sub> N <sub>8</sub>                 |
|          | 329.1172            | -1.6           | 14.5 | C <sub>22</sub> H <sub>17</sub> O <sub>3</sub>                               |
|          | 329.1173            | -1.7           | 1.5  | C <sub>7</sub> H <sub>21</sub> O <sub>3</sub> N <sub>8</sub> S <sub>2</sub>  |
|          | 329.1174            | -2.2           | 4.5  | C <sub>15</sub> H <sub>25</sub> N <sub>2</sub> S <sub>3</sub>                |
|          | 329.1159            | 2.4            | 2.0  | C <sub>5</sub> H <sub>19</sub> O <sub>2</sub> N <sub>11</sub> S <sub>2</sub> |
|          | 329.1159            | 2.5            | 15.0 | C <sub>20</sub> H <sub>15</sub> O <sub>2</sub> N <sub>3</sub>                |
|          | 329.1177            | -3.1           | 7.5  | C <sub>7</sub> H <sub>13</sub> O <sub>4</sub> N <sub>12</sub>                |
|          | 329.1177            | -3.1           | 2.0  | C <sub>8</sub> H <sub>19</sub> O <sub>9</sub> N <sub>5</sub>                 |
|          | 329.1179            | -3.7           | 10.5 | C <sub>15</sub> H <sub>17</sub> O <sub>1</sub> N <sub>6</sub> S <sub>1</sub> |
|          | 329.1152            | 4.5            | 6.0  | C <sub>12</sub> H <sub>19</sub> O <sub>4</sub> N <sub>5</sub> S <sub>1</sub> |

aet9-9 MW=258?  
(H<sub>2</sub>O)/MeOH + NH<sub>4</sub>OAc

# Compound 5

EPSRC National Centre Swansea  
LTQ Orbitrap XL

adam throup  
30/11/2012 15:22:52

BRASHE237-OV-HNESP #30-50 RT: 0.72-1.28 AV: 21 SM: 7G NL: 1.32E6

T: FTMS + p NSI Full ms [120.00-2000.00]

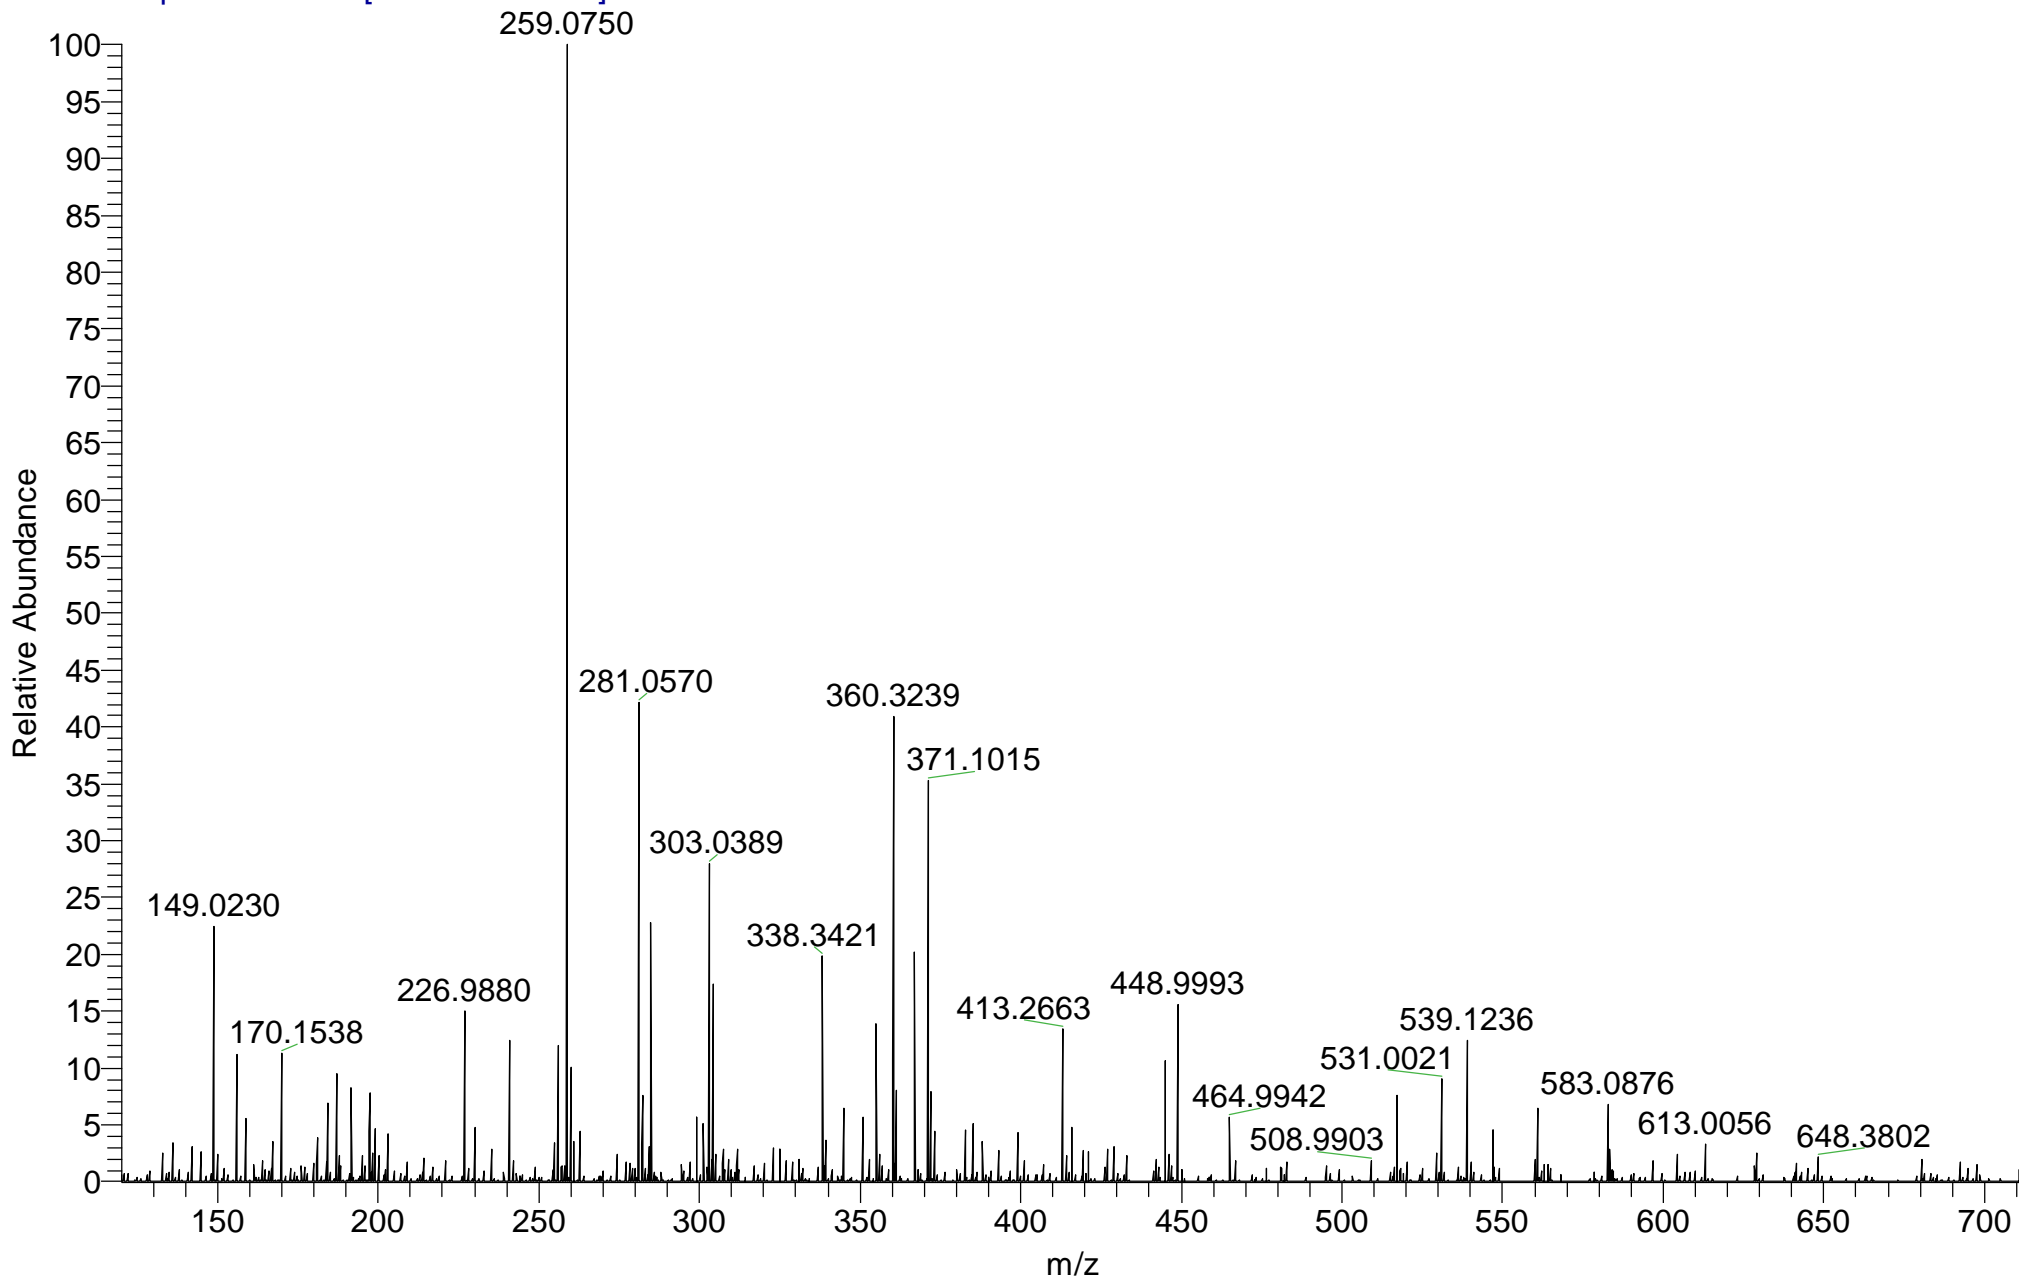

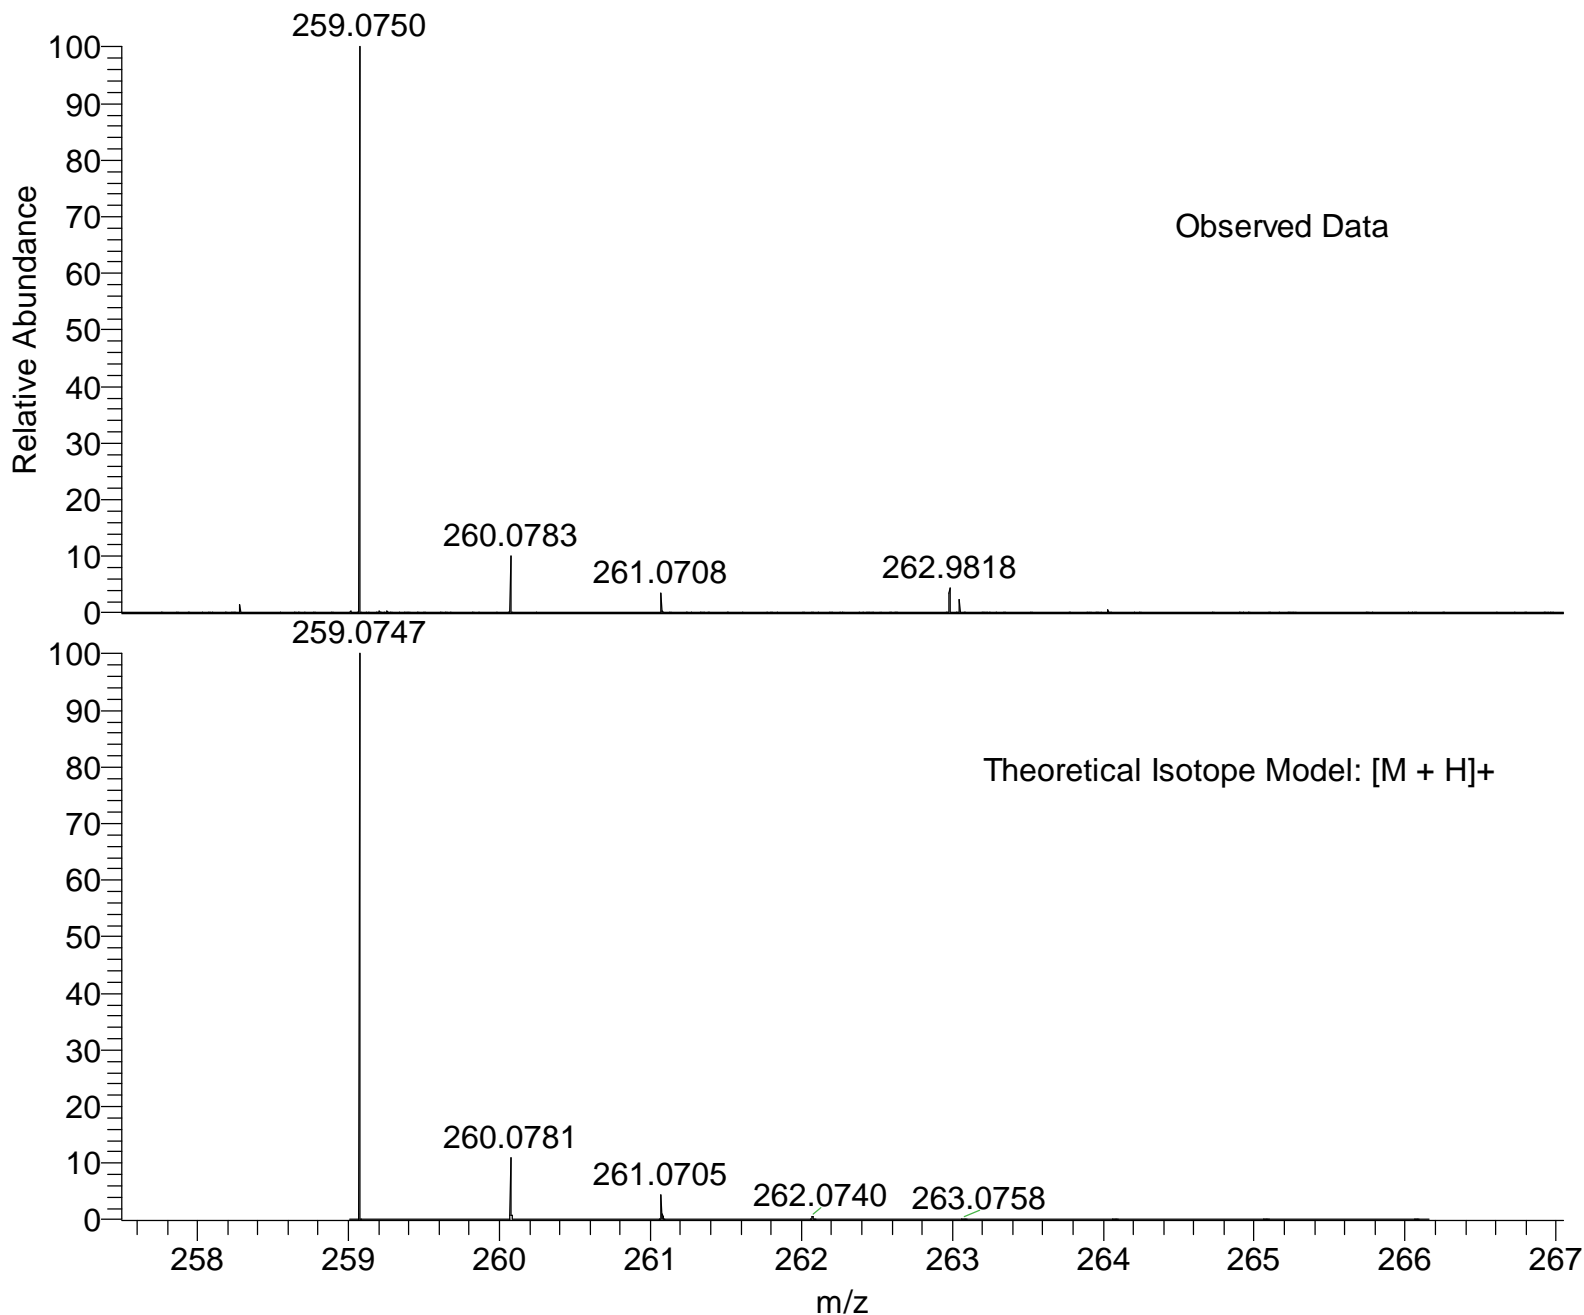

NL:  
1.32E6  
BRASHE237-OV-HNESP#30-  
50 RT: 0.72-1.28 AV: 21 T:  
FTMS + p NSI Full ms  
[120.00-2000.00]

NL:  
1.96E4  
C<sub>10</sub> H<sub>14</sub> N<sub>2</sub> O<sub>4</sub> SH:  
C<sub>10</sub> H<sub>15</sub> N<sub>2</sub> O<sub>4</sub> S<sub>1</sub>  
p (gss, s /p:40) Chrg 1  
R: 100000 Res .Pwr . @FWHM

Isotope:           Min. .. Max.  
 14 N               0....12  
 16 O               0....14  
 12 C               0....50  
 1 H                0....65  
 23 Na              0....0  
 32 S               0....4

Tolerance Window:           +- 5.00 ppm  
 Db/Ring Equiv: -3.. 100       N-Rule: Do not use  
 Fits:                100        Charge: 1

| Mass     | Theoretical<br>Mass | Delta<br>[ppm] | RDB  | Composition                                                                  |
|----------|---------------------|----------------|------|------------------------------------------------------------------------------|
| 259.0750 | 259.0747            | 1.1            | 4.5  | C <sub>10</sub> H <sub>15</sub> O <sub>4</sub> N <sub>2</sub> S <sub>1</sub> |
|          | 259.0754            | -1.4           | 13.5 | C <sub>18</sub> H <sub>11</sub> O <sub>2</sub>                               |
|          | 259.0754            | -1.5           | 0.5  | C <sub>3</sub> H <sub>15</sub> O <sub>2</sub> N <sub>8</sub> S <sub>2</sub>  |
|          | 259.0745            | 1.8            | 1.5  | C <sub>2</sub> H <sub>11</sub> O <sub>7</sub> N <sub>8</sub>                 |
|          | 259.0759            | -3.3           | 6.5  | C <sub>3</sub> H <sub>7</sub> O <sub>3</sub> N <sub>12</sub>                 |
|          | 259.0759            | -3.3           | 1.0  | C <sub>4</sub> H <sub>13</sub> O <sub>8</sub> N <sub>5</sub>                 |
|          | 259.0740            | 3.7            | 1.0  | C <sub>1</sub> H <sub>13</sub> O <sub>1</sub> N <sub>11</sub> S <sub>2</sub> |
|          | 259.0740            | 3.8            | 14.0 | C <sub>16</sub> H <sub>9</sub> O <sub>1</sub> N <sub>3</sub>                 |
|          | 259.0760            | -4.0           | 9.5  | C <sub>11</sub> H <sub>11</sub> N <sub>6</sub> S <sub>1</sub>                |

aet9-13 MW=300?  
(H<sub>2</sub>O)/MeOH + NH<sub>4</sub>OAc

# Compound 6

EPSRC National Centre Swansea  
LTQ Orbitrap XL

adam throup  
30/11/2012 15:26:17

BRASHE238-OV-HNESP #10-24 RT: 0.20-0.58 AV: 14 SM: 7G NL: 1.42E7

T: FTMS + p NSI Full ms [120.00-2000.00]

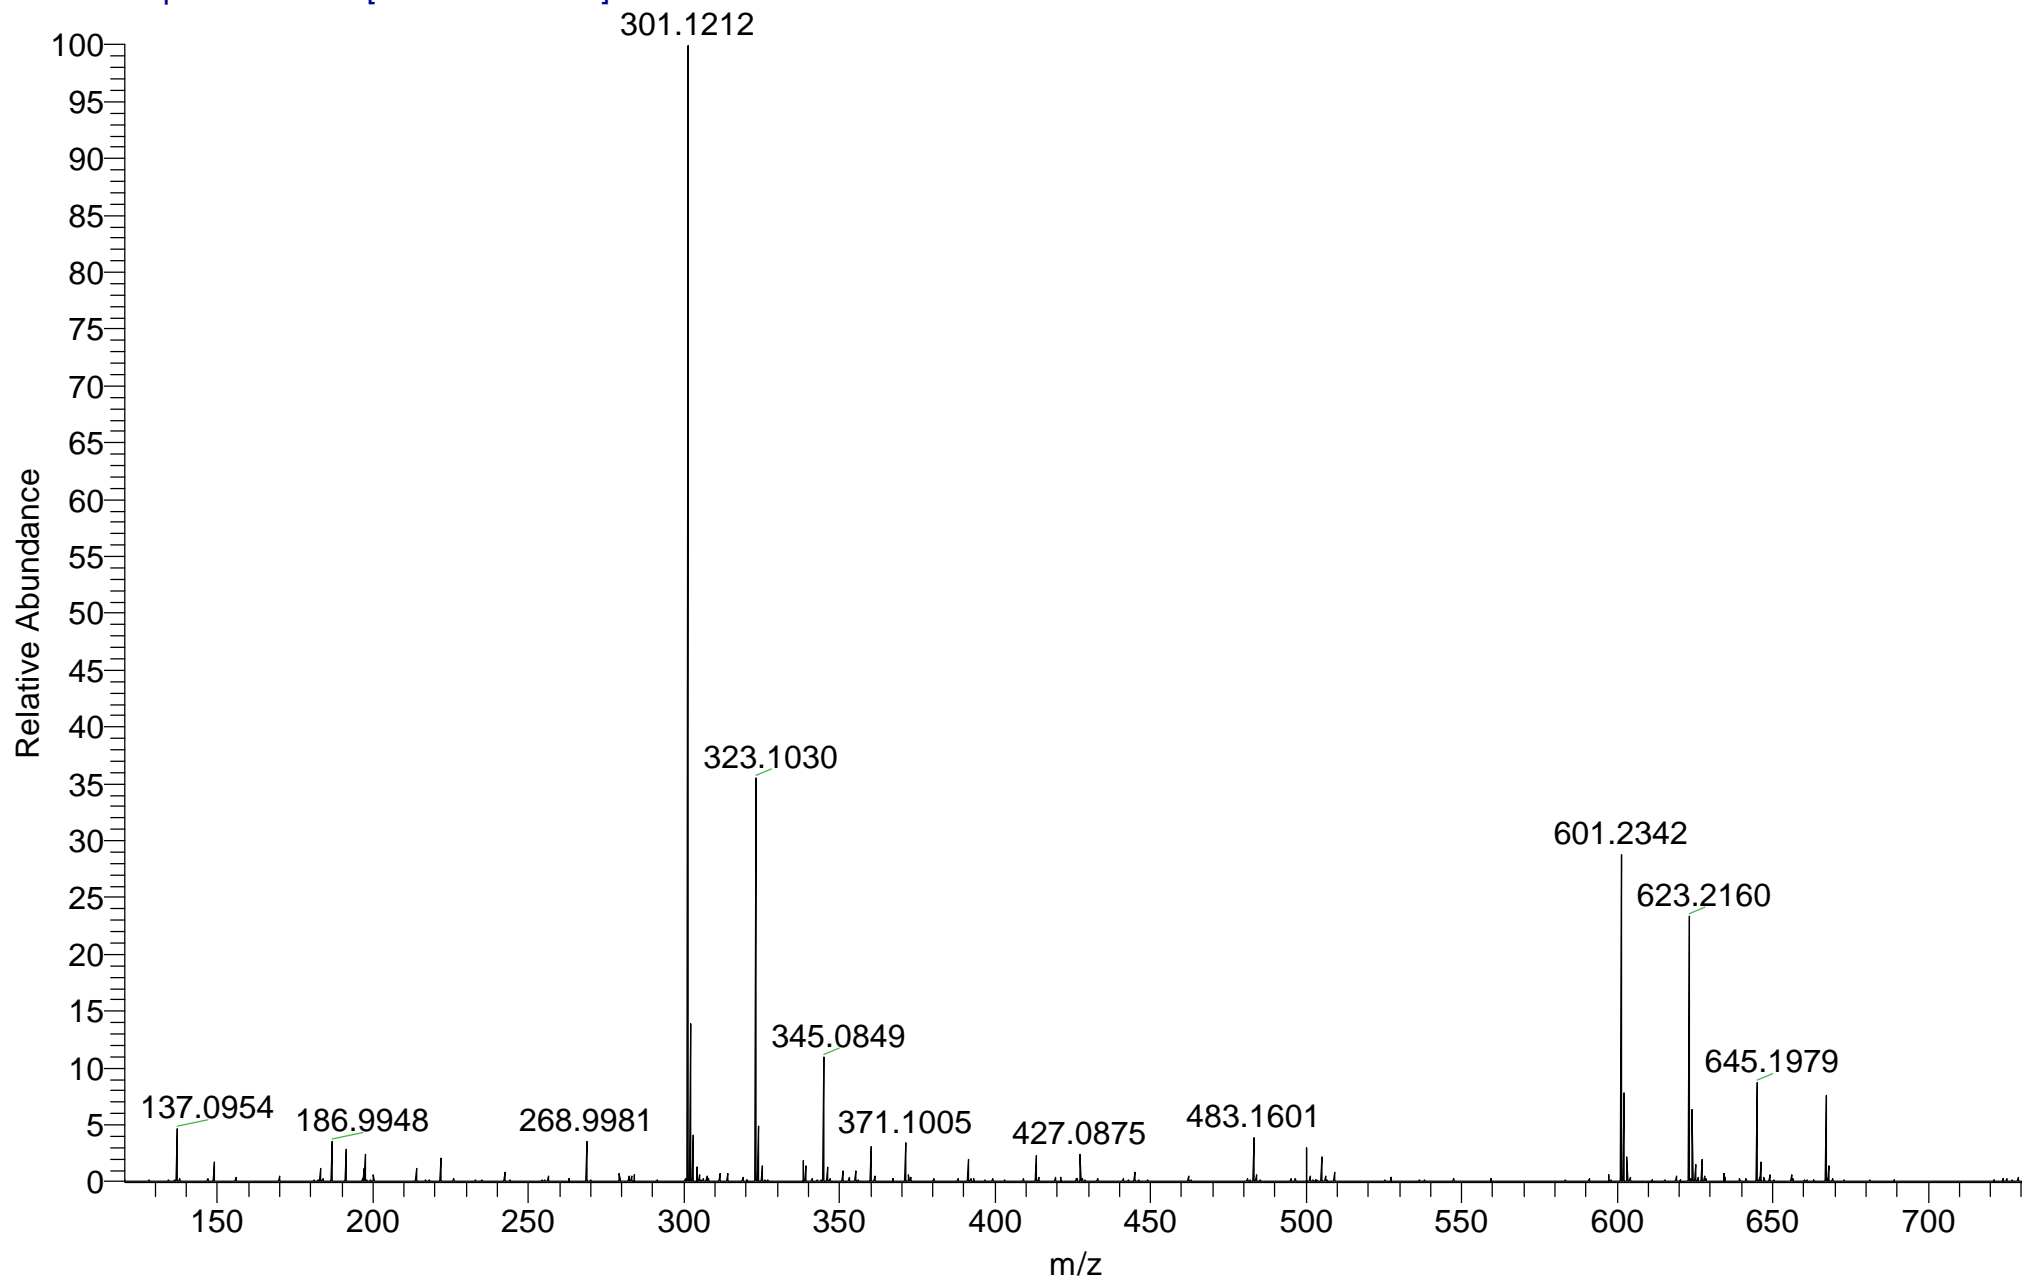

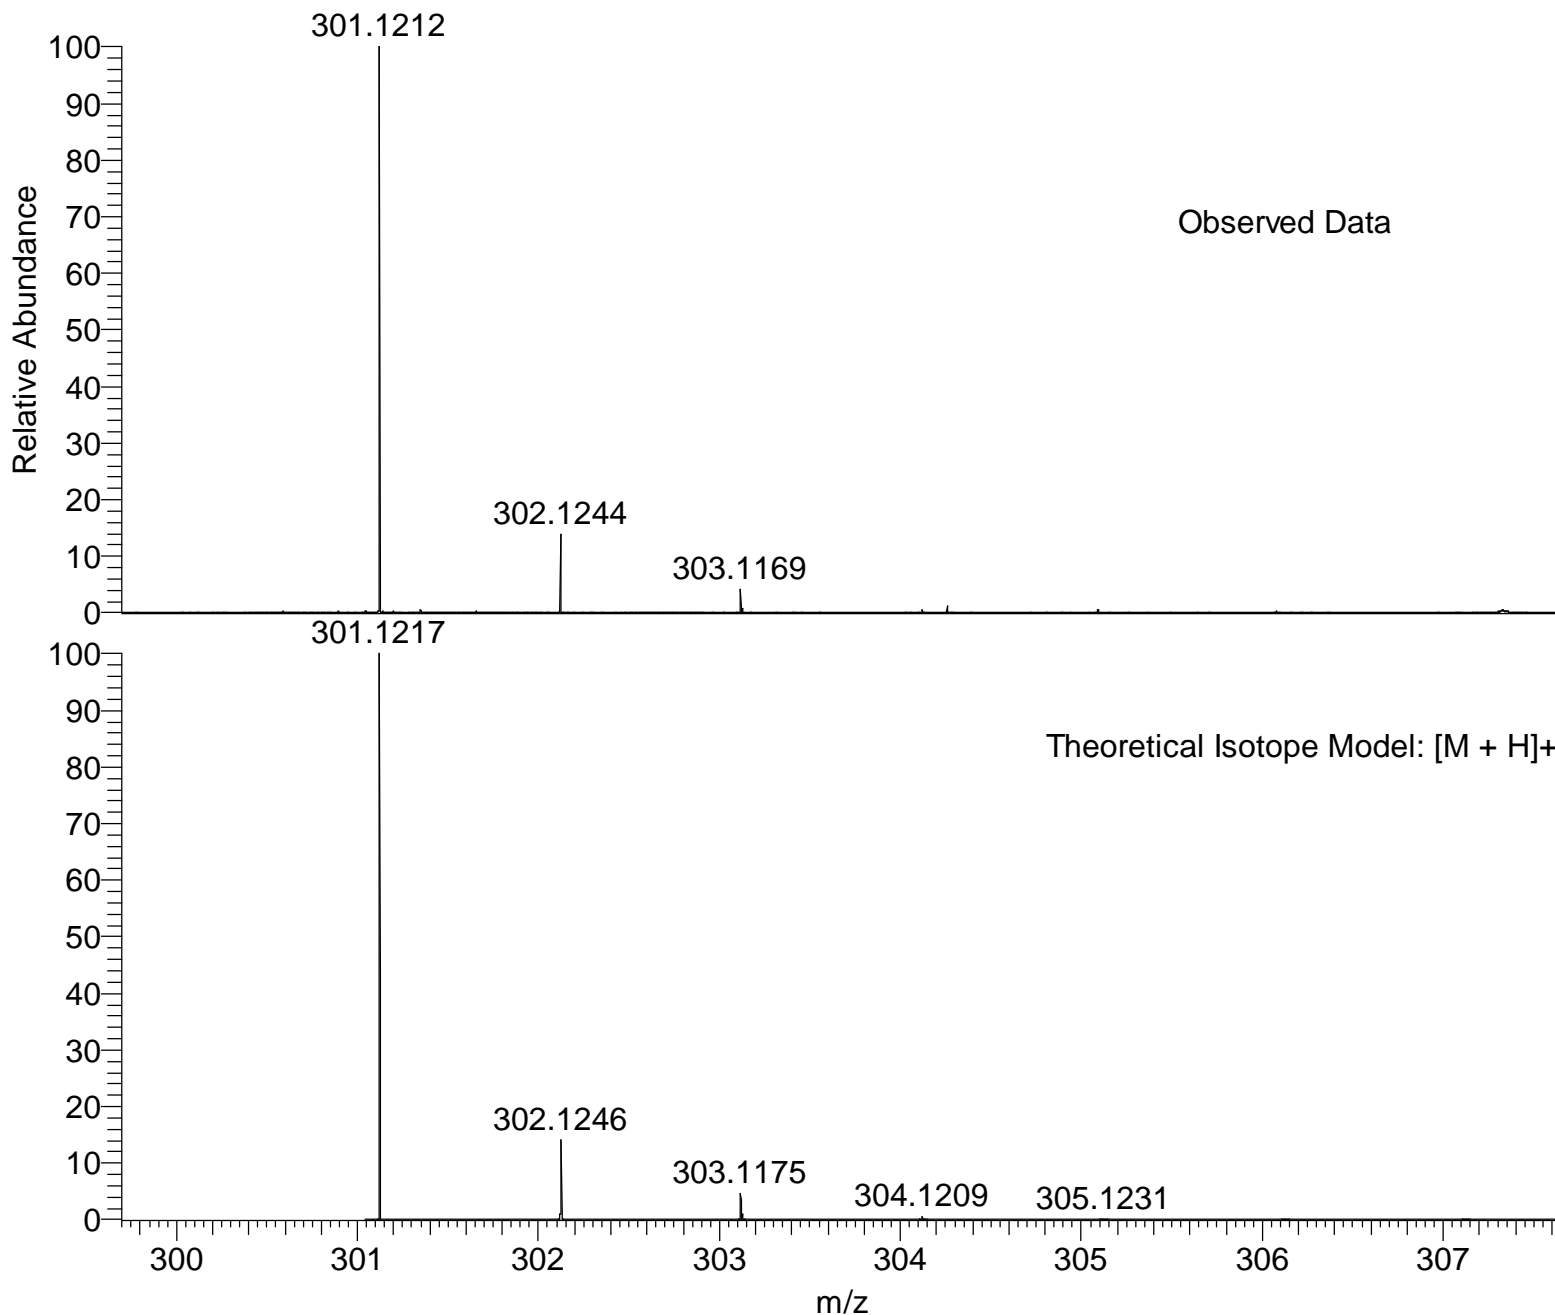

NL:  
1.42E7  
BRASHE238-OV-HNESP#10-  
24 RT: 0.20-0.58 AV: 14 T:  
FTMS + p NSI Full ms  
[120.00-2000.00]

NL:  
1.90E4  
C<sub>13</sub> H<sub>20</sub> N<sub>2</sub> O<sub>4</sub> SH:  
C<sub>13</sub> H<sub>21</sub> N<sub>2</sub> O<sub>4</sub> S<sub>1</sub>  
p (gss, s /p:40) Chrg 1  
R: 100000 Res .Pwr . @FWHM

Isotope:           Min. .. Max.  
 14 N               0....12  
 16 O               0....14  
 12 C               0....50  
 1 H                0....65  
 23 Na              0....0  
 32 S               0....4

Tolerance Window:           +- 5.00 ppm  
 Db/Ring Equiv: -3.. 100       N-Rule: Do not use  
 Fits:                100        Charge: 1

| Mass     | Theoretical<br>Mass | Delta<br>[ppm] | RDB  | Composition                                                                  |
|----------|---------------------|----------------|------|------------------------------------------------------------------------------|
| 301.1212 | 301.1210            | 0.7            | 1.0  | C <sub>4</sub> H <sub>19</sub> O <sub>1</sub> N <sub>11</sub> S <sub>2</sub> |
|          | 301.1210            | 0.8            | 14.0 | C <sub>19</sub> H <sub>15</sub> O <sub>1</sub> N <sub>3</sub>                |
|          | 301.1215            | -0.9           | 1.5  | C <sub>5</sub> H <sub>17</sub> O <sub>7</sub> N <sub>8</sub>                 |
|          | 301.1217            | -1.5           | 4.5  | C <sub>13</sub> H <sub>21</sub> O <sub>4</sub> N <sub>2</sub> S <sub>1</sub> |
|          | 301.1203            | 3.0            | 5.0  | C <sub>11</sub> H <sub>19</sub> O <sub>3</sub> N <sub>5</sub> S <sub>1</sub> |
|          | 301.1201            | 3.6            | 2.0  | C <sub>3</sub> H <sub>15</sub> O <sub>6</sub> N <sub>11</sub>                |
|          | 301.1223            | -3.7           | 13.5 | C <sub>21</sub> H <sub>17</sub> O <sub>2</sub>                               |
|          | 301.1223            | -3.8           | 0.5  | C <sub>6</sub> H <sub>21</sub> O <sub>2</sub> N <sub>8</sub> S <sub>2</sub>  |
|          | 301.1198            | 4.5            | -1.0 | C <sub>11</sub> H <sub>27</sub> O <sub>2</sub> N <sub>1</sub> S <sub>3</sub> |

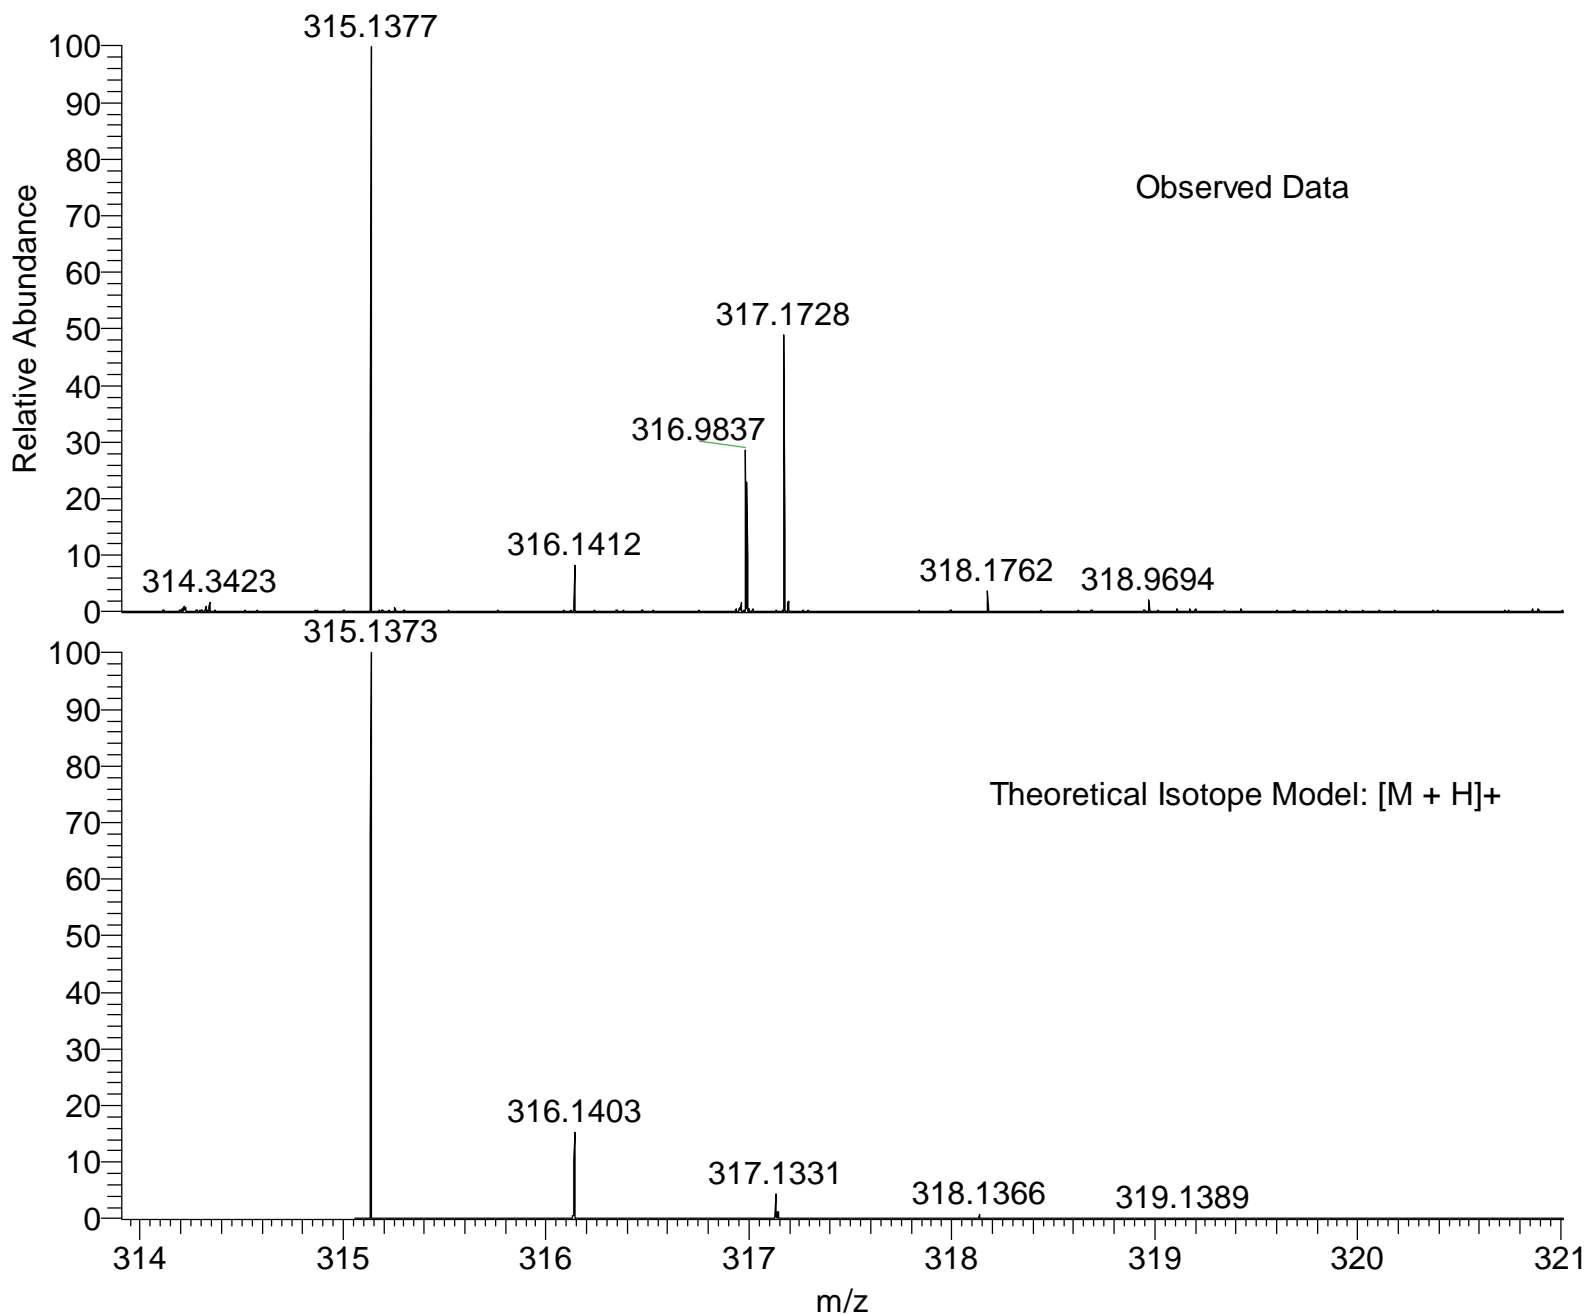

NL:  
5.64E4  
BRASHE236-OV-HNESP#33-  
51 RT: 0.78-1.29 AV: 19 T:  
FTMS + p NSI Full ms  
[120.00-2000.00]

NL:  
1.88E4  
C<sub>14</sub>H<sub>22</sub>N<sub>2</sub>O<sub>4</sub>SH:  
C<sub>14</sub>H<sub>23</sub>N<sub>2</sub>O<sub>4</sub>S<sub>1</sub>  
p (gss, s /p:40) Chrg 1  
R: 100000 Res .Pwr . @FWHM



Isotope: Min. .. Max.  
 14 N 0....12  
 16 O 0....14  
 12 C 0....50  
 1 H 0....65  
 23 Na 0....0  
 32 S 0....4

Tolerance Window: +- 5.00 ppm  
 Db/Ring Equiv: -3.. 100 N-Rule: Do not use  
 Fits: 100 Charge: 1

| Mass     | Theoretical<br>Mass | Delta<br>[ppm] | RDB  | Composition                                                                  |
|----------|---------------------|----------------|------|------------------------------------------------------------------------------|
| 315.1377 | 315.1380            | -0.8           | 13.5 | C <sub>22</sub> H <sub>19</sub> O <sub>2</sub>                               |
|          | 315.1380            | -0.9           | 0.5  | C <sub>7</sub> H <sub>23</sub> O <sub>2</sub> N <sub>8</sub> S <sub>2</sub>  |
|          | 315.1373            | 1.3            | 4.5  | C <sub>14</sub> H <sub>23</sub> O <sub>4</sub> N <sub>2</sub> S <sub>1</sub> |
|          | 315.1371            | 1.8            | 1.5  | C <sub>6</sub> H <sub>19</sub> O <sub>7</sub> N <sub>8</sub>                 |
|          | 315.1385            | -2.4           | 6.5  | C <sub>7</sub> H <sub>15</sub> O <sub>3</sub> N <sub>12</sub>                |
|          | 315.1385            | -2.4           | 1.0  | C <sub>8</sub> H <sub>21</sub> O <sub>8</sub> N <sub>5</sub>                 |
|          | 315.1386            | -3.0           | 9.5  | C <sub>15</sub> H <sub>19</sub> N <sub>6</sub> S <sub>1</sub>                |
|          | 315.1366            | 3.3            | 1.0  | C <sub>5</sub> H <sub>21</sub> O <sub>1</sub> N <sub>11</sub> S <sub>2</sub> |
|          | 315.1366            | 3.4            | 14.0 | C <sub>20</sub> H <sub>17</sub> O <sub>1</sub> N <sub>3</sub>                |
|          | 315.1391            | -4.6           | -3.0 | C <sub>1</sub> H <sub>21</sub> O <sub>6</sub> N <sub>11</sub> S <sub>1</sub> |

PA1-49 MW=496?  
ASAP(SOLID)

# Compound 17

EPSRC National Centre Swansea  
LTQ Orbitrap XL

Thrup  
06/11/2012 11:32:08

BRASHE228-PG-HASP #127-133 RT: 3.64-3.81 AV: 7 SM: 7G NL: 3.80E6  
T: FTMS + p APCI corona Full ms [100.00-800.00]

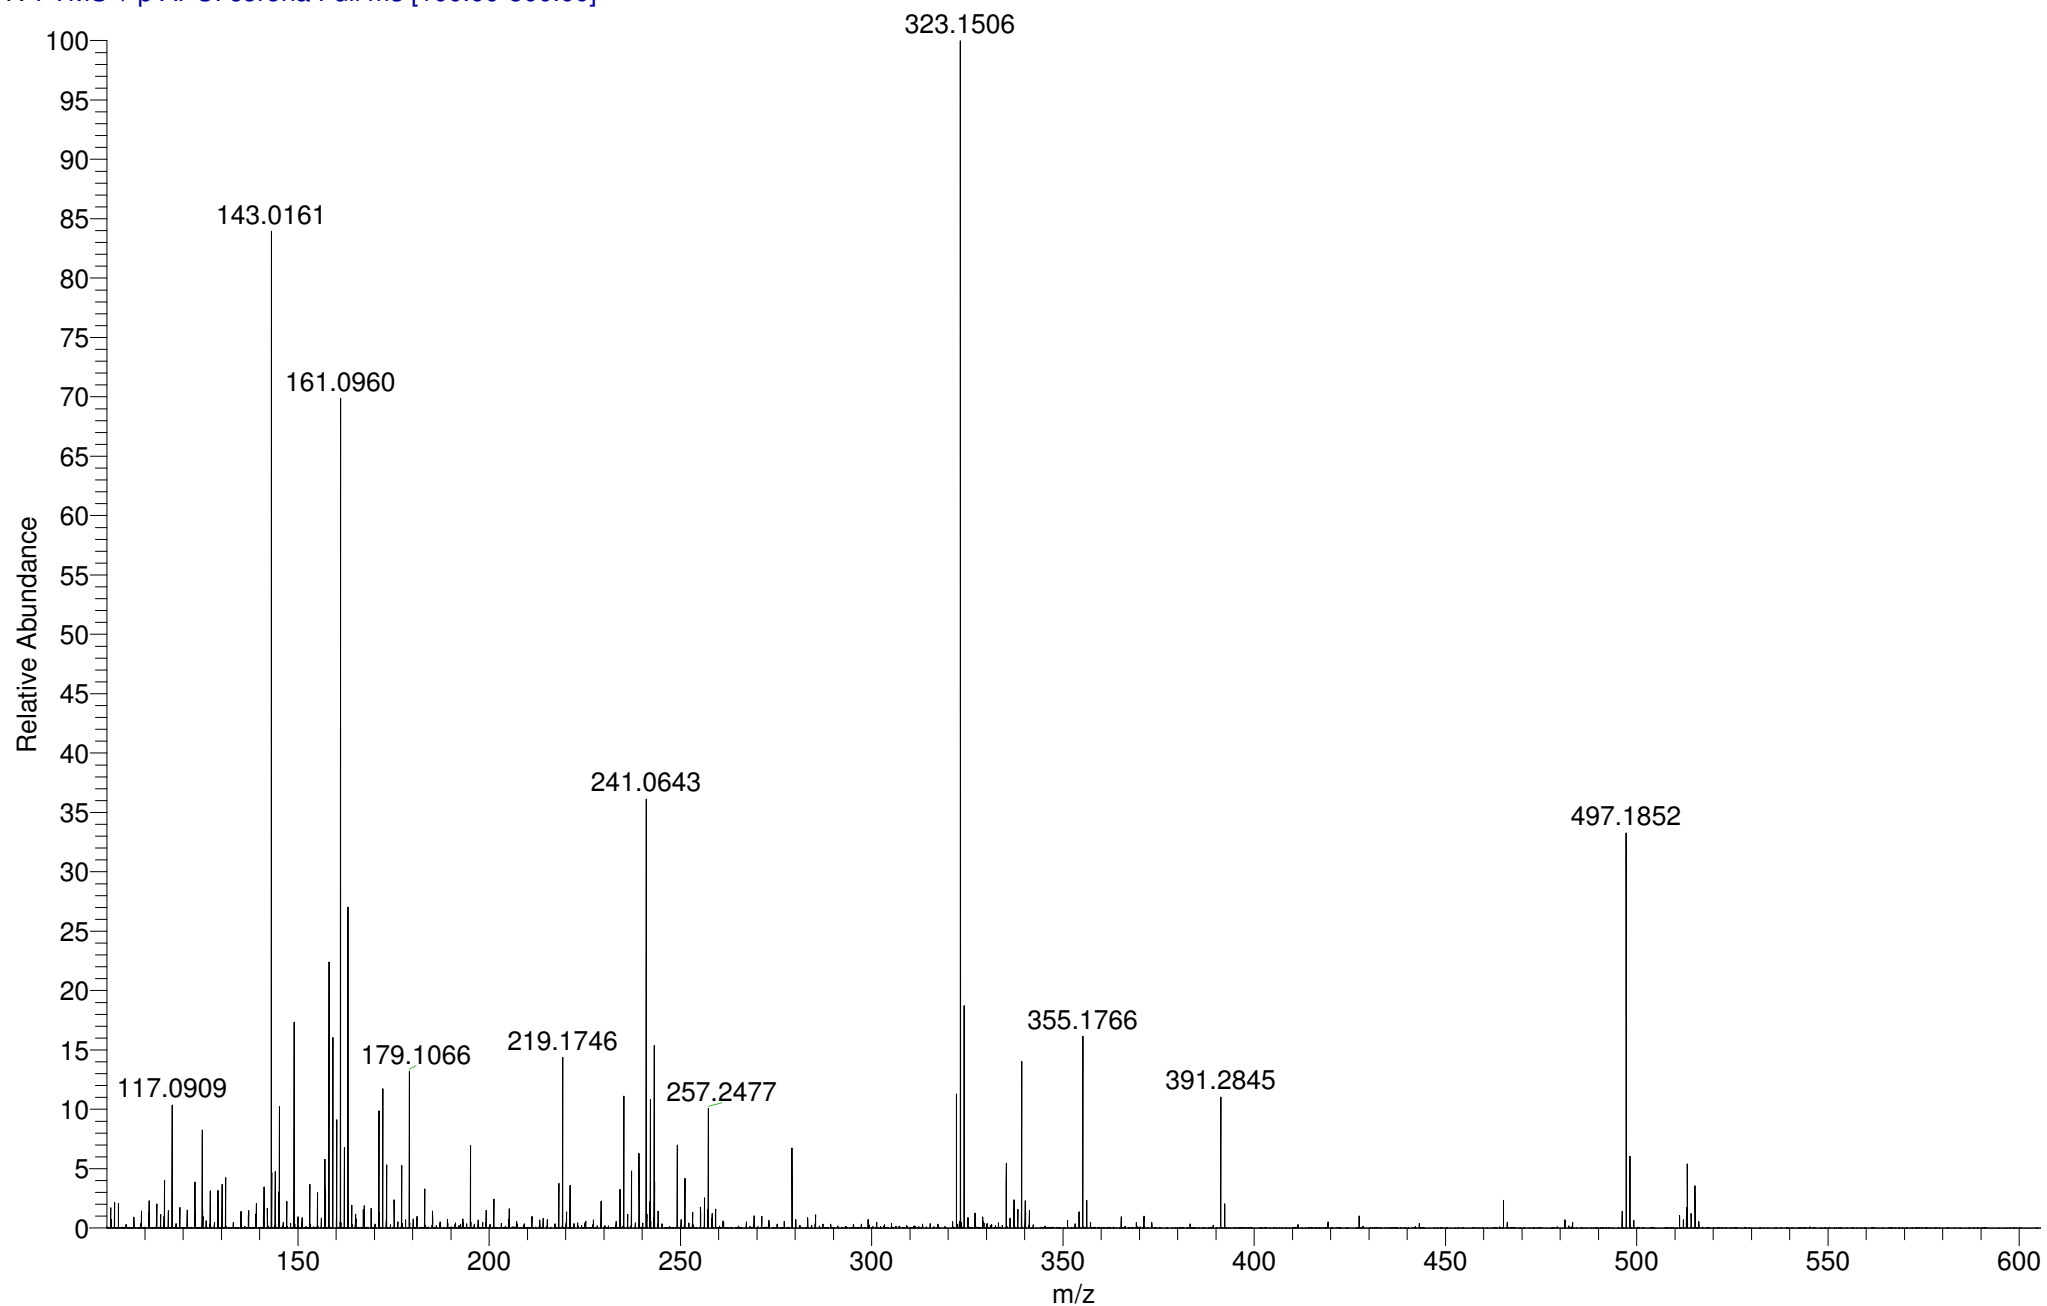

BRASHE228-PG-HASP #127-133 RT: 3.64-3.81 AV: 7 SM: 7G NL: 3.80E6  
T: FTMS + p APCI corona Full ms [100.00-800.00]

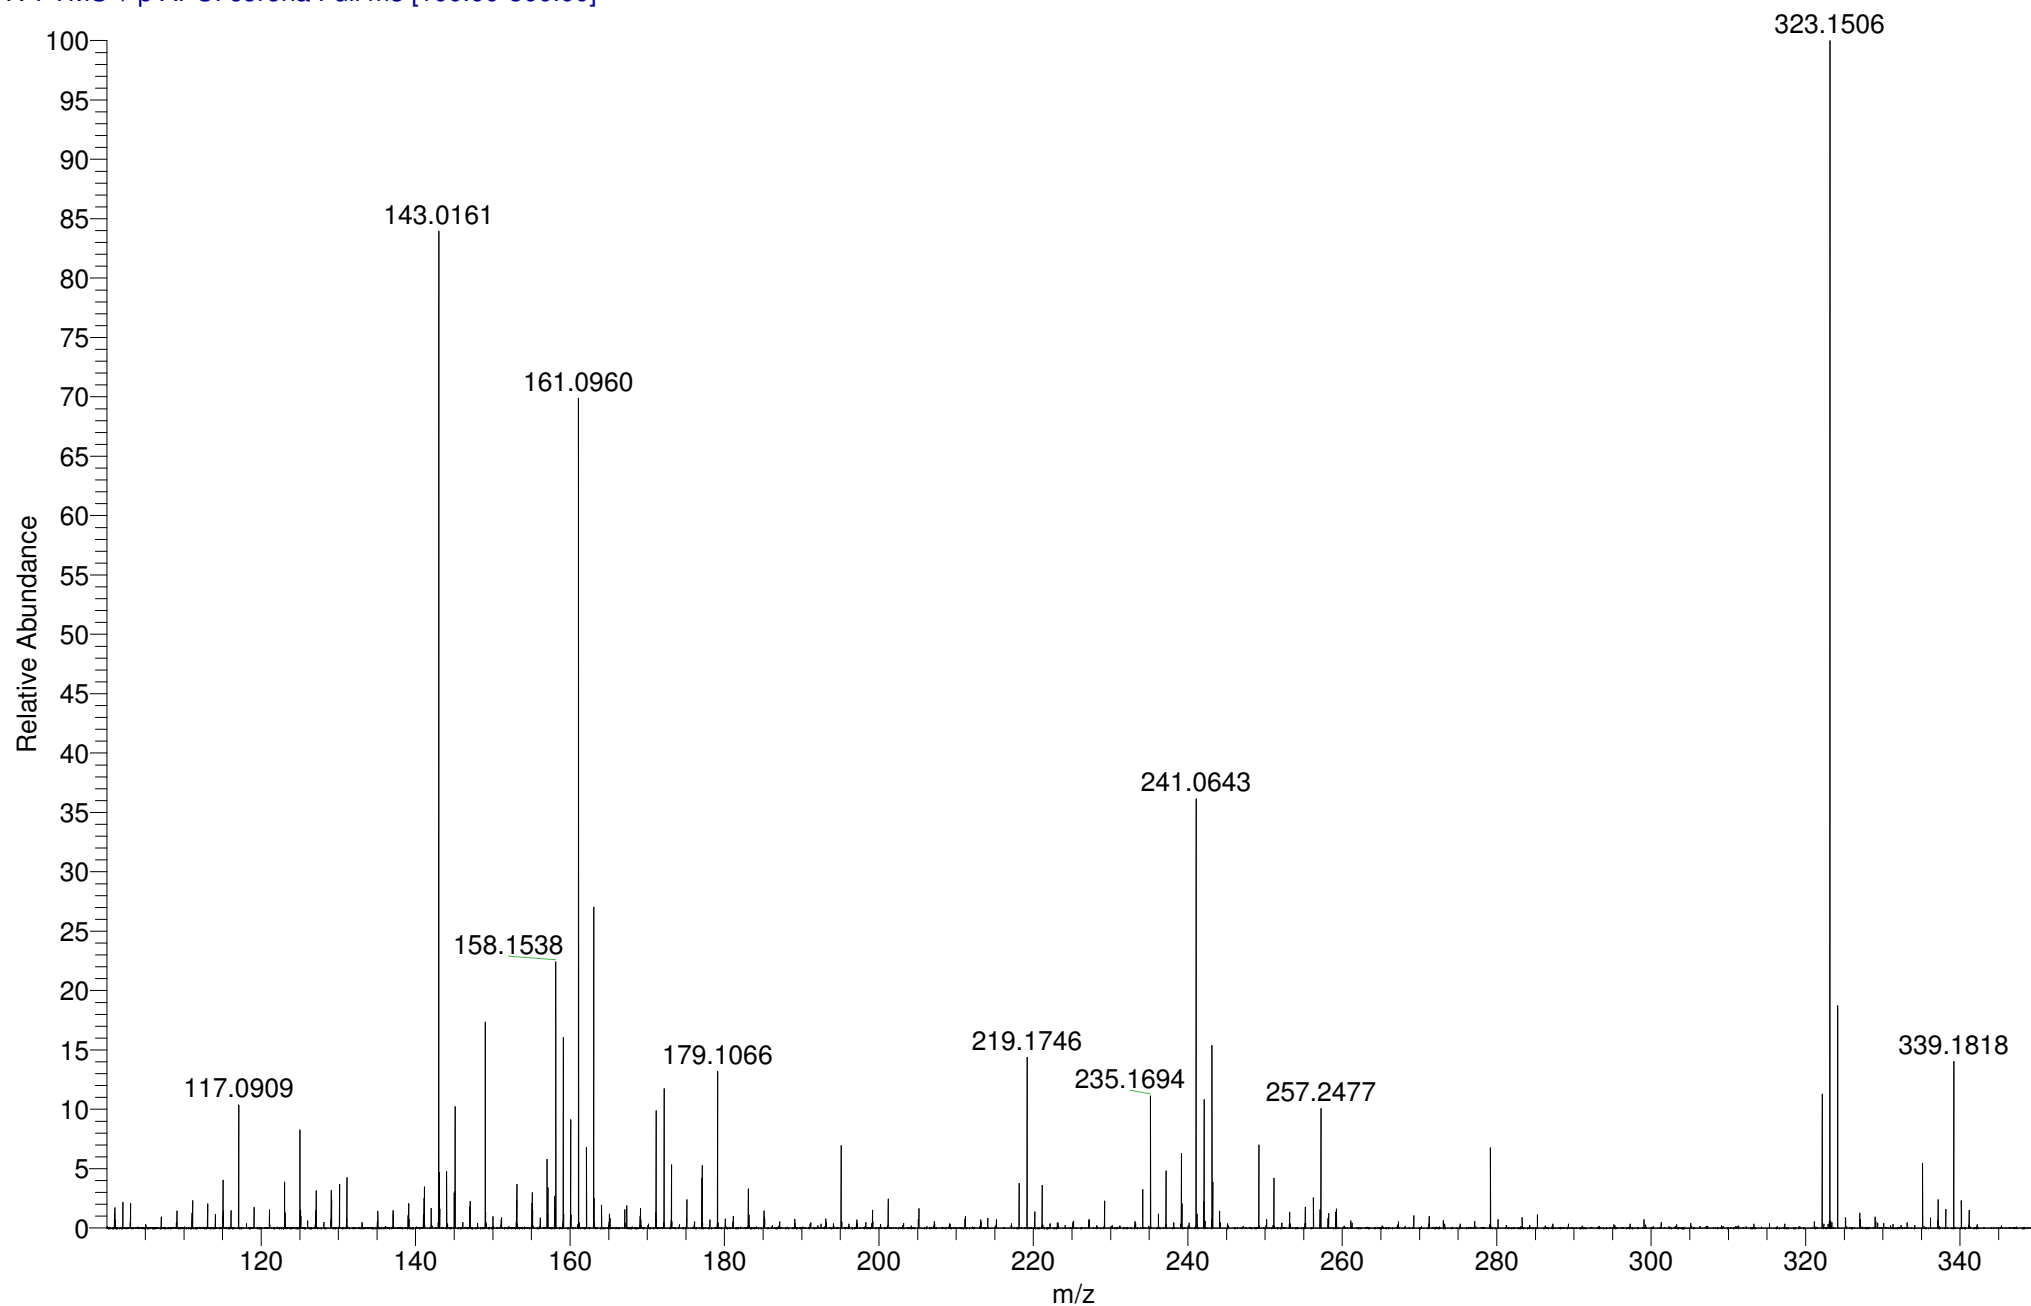

BRASHE228-PG-HASP #127-133 RT: 3.64-3.81 AV: 7 SM: 7G NL: 1.26E6  
T: FTMS + p APCI corona Full ms [100.00-800.00]

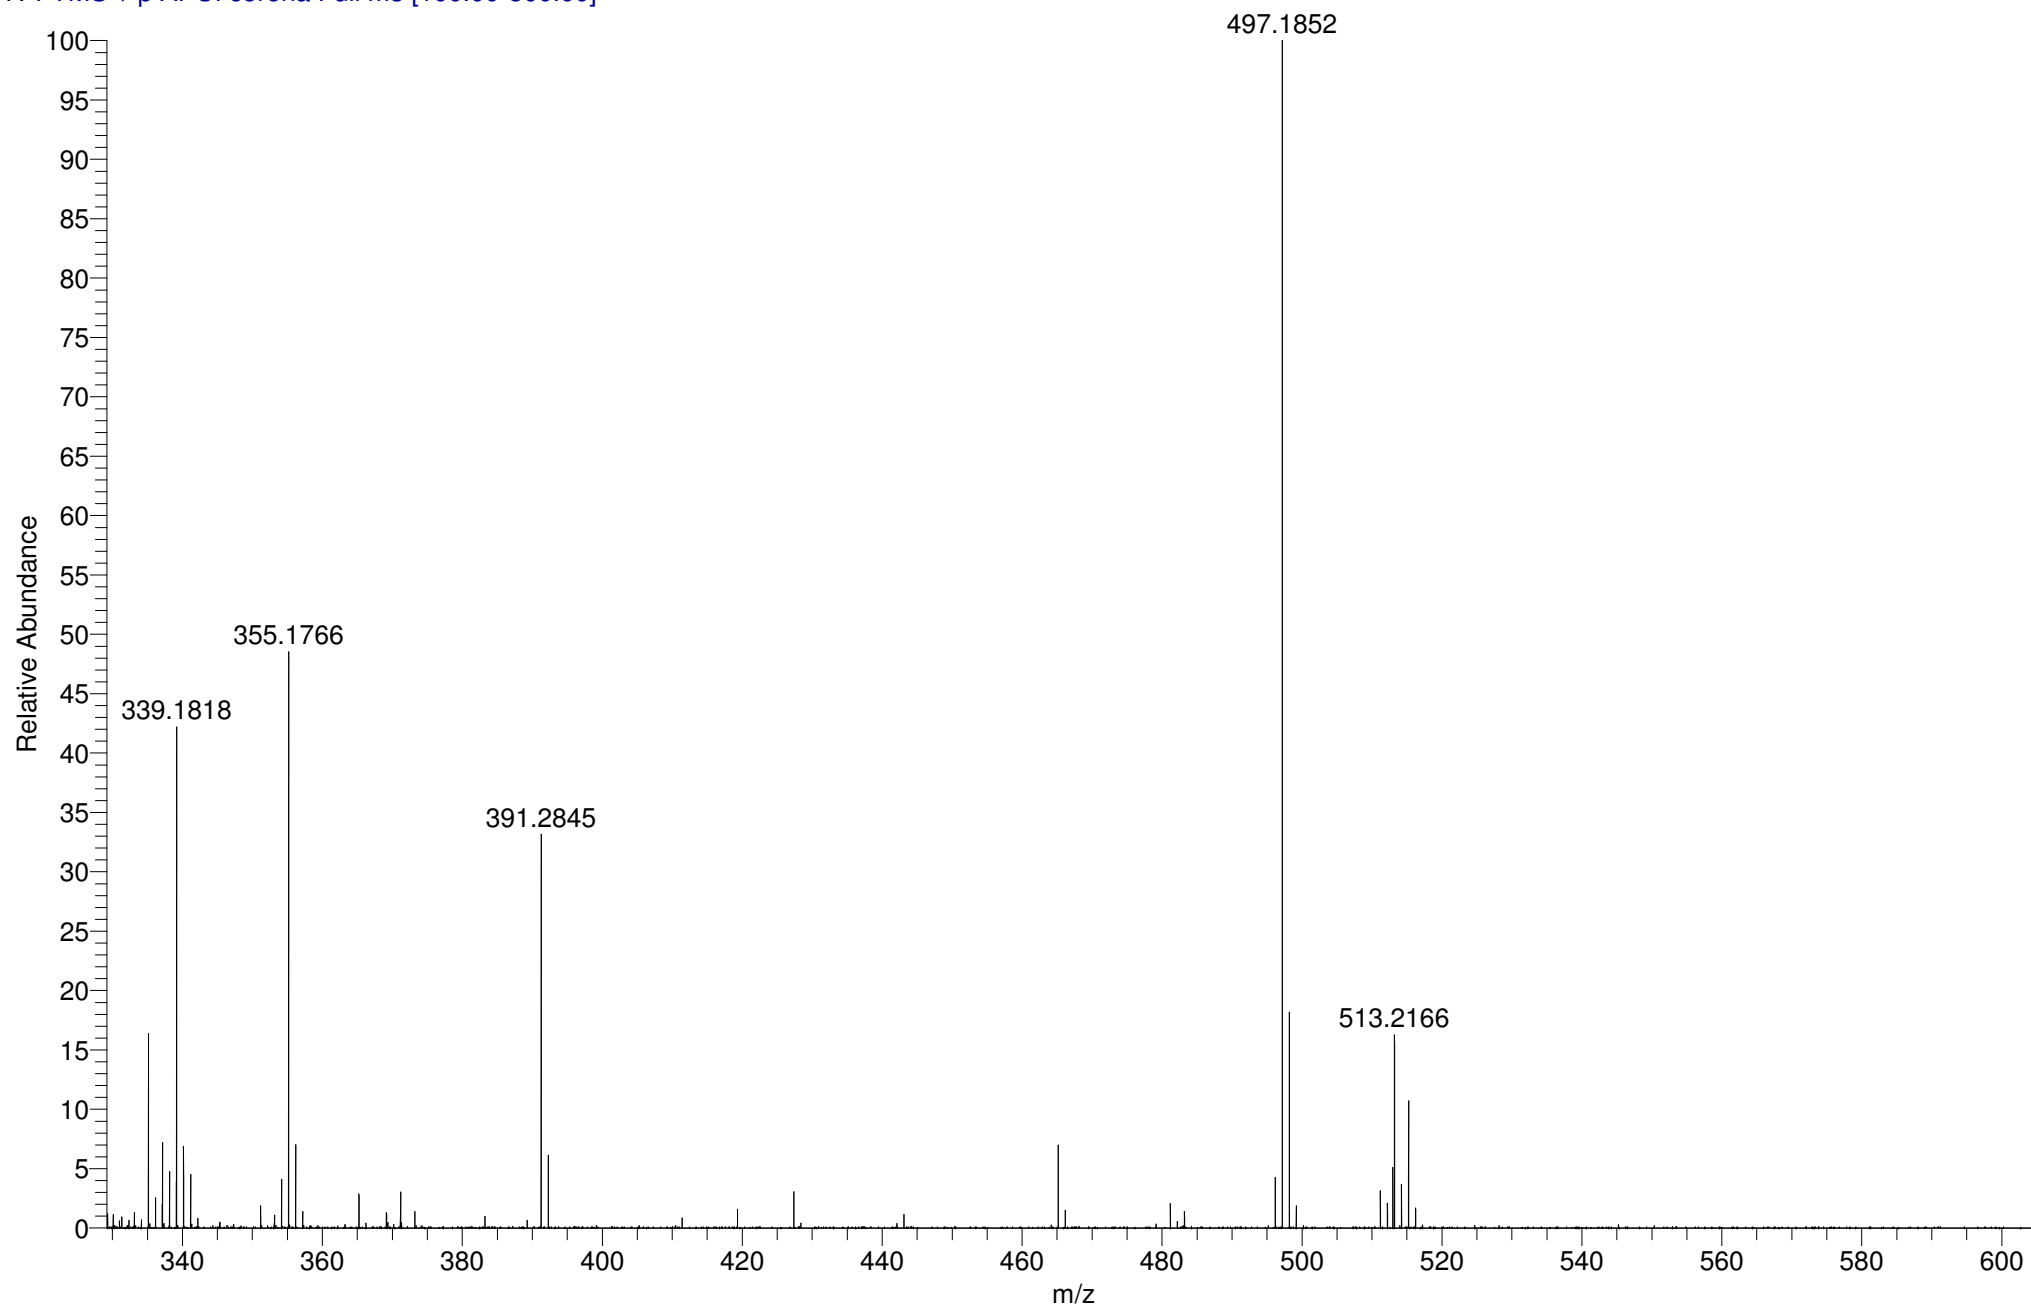

SM: 7G

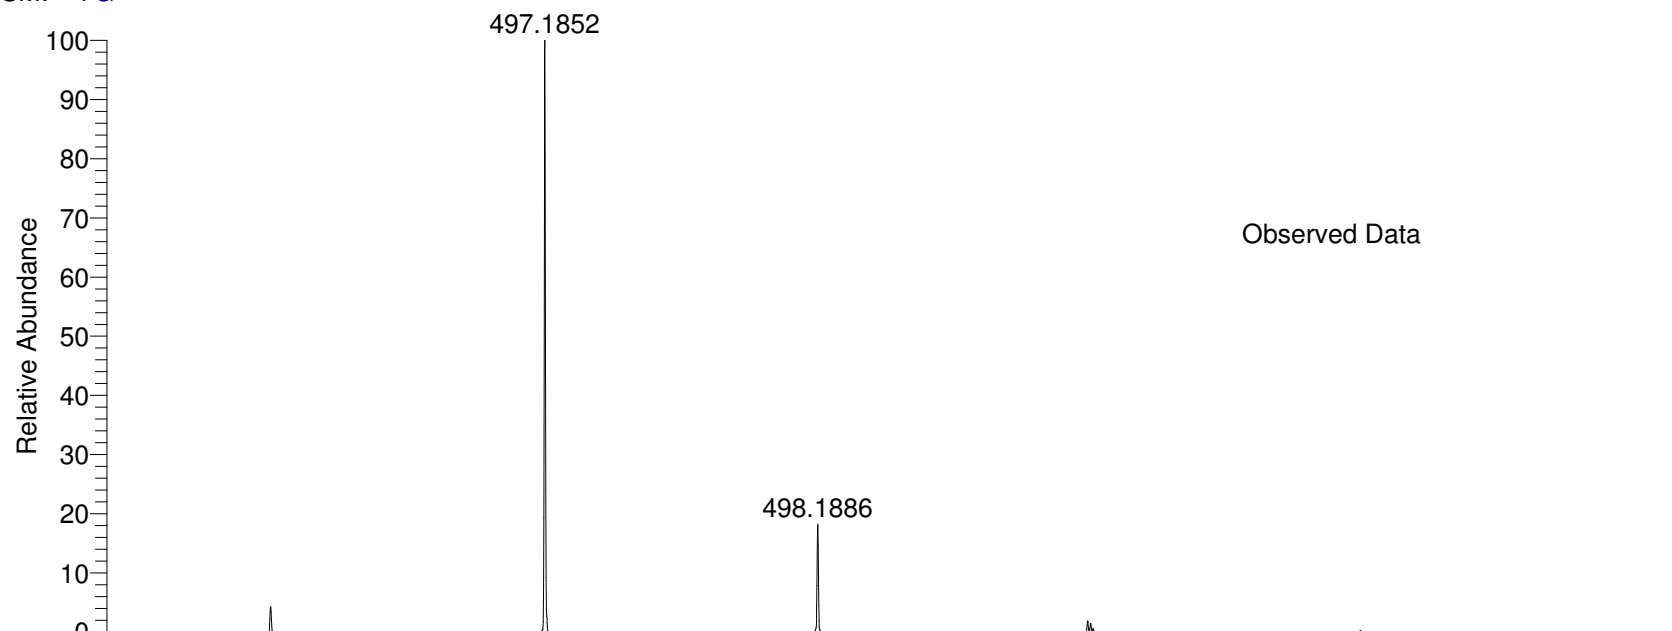

NL:  
1.26E6  
BRASHE228-PG-HASP#127-  
133 RT: 3.64-3.81 AV: 7 T:  
FTMS + p APCI corona Full ms  
[100.00-800.00]

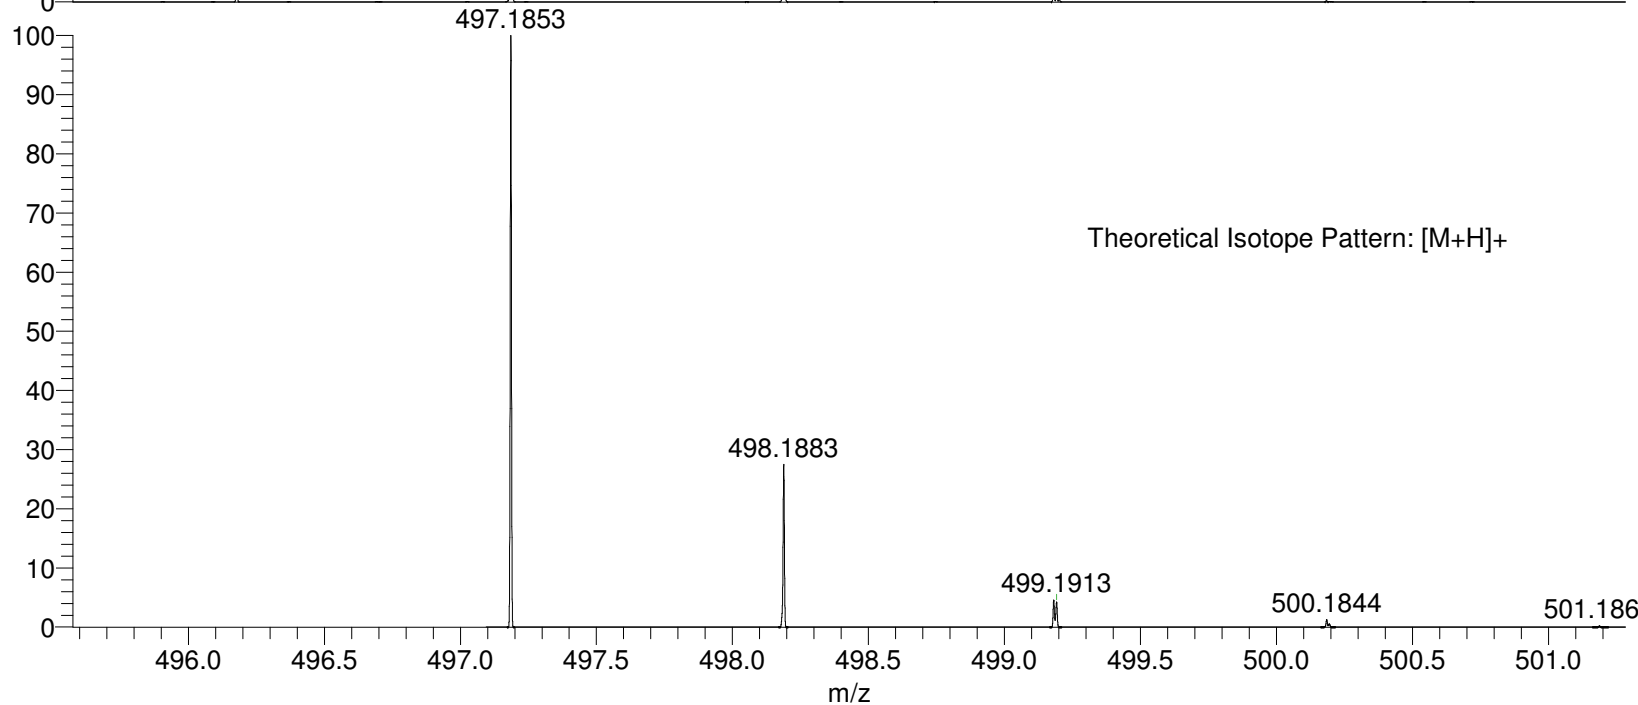

NL:  
1.65E4  
C25H28N4O5SH:  
C25H29N4O5S1  
p (gss, s /p:40) Chrg 1  
R: 100000 Res .Pwr . @FWHM

Isotope:                   Min. .. Max.  
 14 N                       0....16  
 16 O                       0....15  
 12 C                       0....80  
 1 H                        0....100  
 23 Na                      0....0  
 32 S                       0....3  
 Tolerance Window:       +- 5.00 ppm  
 Db/Ring Equiv:           -3.. 100  
 Fits:                      100

N-Rule: Do not use  
 Charge: 1

| Mass     | Theoretical Mass | Delta [ppm] | RDB  | Composition                                                                   |
|----------|------------------|-------------|------|-------------------------------------------------------------------------------|
| 497.1852 | 497.1851         | 0.1         | 5.0  | C <sub>18</sub> H <sub>31</sub> O <sub>13</sub> N <sub>3</sub>                |
|          | 497.1851         | 0.1         | 10.5 | C <sub>17</sub> H <sub>25</sub> O <sub>8</sub> N <sub>10</sub>                |
|          | 497.1853         | -0.2        | 19.0 | C <sub>24</sub> H <sub>23</sub> N <sub>11</sub> S <sub>1</sub>                |
|          | 497.1853         | -0.2        | 13.5 | C <sub>25</sub> H <sub>29</sub> O <sub>5</sub> N <sub>4</sub> S <sub>1</sub>  |
|          | 497.1854         | -0.3        | 0.5  | C <sub>10</sub> H <sub>33</sub> O <sub>5</sub> N <sub>12</sub> S <sub>3</sub> |
|          | 497.1848         | 0.7         | 7.5  | C <sub>25</sub> H <sub>37</sub> O <sub>4</sub> S <sub>3</sub>                 |
|          | 497.1856         | -0.9        | -2.0 | C <sub>3</sub> H <sub>27</sub> O <sub>14</sub> N <sub>15</sub>                |
|          | 497.1847         | 1.1         | 4.5  | C <sub>17</sub> H <sub>33</sub> O <sub>7</sub> N <sub>6</sub> S <sub>2</sub>  |
|          | 497.1847         | 1.1         | 10.0 | C <sub>16</sub> H <sub>27</sub> O <sub>2</sub> N <sub>13</sub> S <sub>2</sub> |
|          | 497.1846         | 1.2         | 23.0 | C <sub>31</sub> H <sub>23</sub> O <sub>2</sub> N <sub>5</sub>                 |
|          | 497.1858         | -1.2        | 6.5  | C <sub>10</sub> H <sub>25</sub> O <sub>6</sub> N <sub>16</sub> S <sub>1</sub> |
|          | 497.1858         | -1.3        | 1.0  | C <sub>11</sub> H <sub>31</sub> O <sub>11</sub> N <sub>9</sub> S <sub>1</sub> |
|          | 497.1845         | 1.4         | 1.5  | C <sub>9</sub> H <sub>29</sub> O <sub>10</sub> N <sub>12</sub> S <sub>1</sub> |
|          | 497.1860         | -1.5        | 22.5 | C <sub>33</sub> H <sub>25</sub> O <sub>3</sub> N <sub>2</sub>                 |
|          | 497.1860         | -1.6        | 9.5  | C <sub>18</sub> H <sub>29</sub> O <sub>3</sub> N <sub>10</sub> S <sub>2</sub> |
|          | 497.1860         | -1.6        | 4.0  | C <sub>19</sub> H <sub>35</sub> O <sub>8</sub> N <sub>3</sub> S <sub>2</sub>  |
|          | 497.1862         | -2.0        | 12.5 | C <sub>26</sub> H <sub>33</sub> N <sub>4</sub> S <sub>3</sub>                 |
|          | 497.1842         | 2.1         | 17.0 | C <sub>31</sub> H <sub>31</sub> O <sub>1</sub> N <sub>1</sub> S <sub>2</sub>  |
|          | 497.1840         | 2.4         | 1.0  | C <sub>8</sub> H <sub>31</sub> O <sub>4</sub> N <sub>15</sub> S <sub>3</sub>  |
|          | 497.1840         | 2.5         | 8.5  | C <sub>24</sub> H <sub>33</sub> O <sub>9</sub> S <sub>1</sub>                 |
|          | 497.1840         | 2.5         | 14.0 | C <sub>23</sub> H <sub>27</sub> O <sub>4</sub> N <sub>7</sub> S <sub>1</sub>  |
|          | 497.1865         | -2.6        | 15.5 | C <sub>18</sub> H <sub>21</sub> O <sub>4</sub> N <sub>14</sub>                |
|          | 497.1865         | -2.6        | 10.0 | C <sub>19</sub> H <sub>27</sub> O <sub>9</sub> N <sub>7</sub>                 |
|          | 497.1865         | -2.6        | 4.5  | C <sub>20</sub> H <sub>33</sub> O <sub>14</sub>                               |
|          | 497.1865         | -2.6        | -3.0 | C <sub>4</sub> H <sub>31</sub> O <sub>9</sub> N <sub>15</sub> S <sub>2</sub>  |
|          | 497.1838         | 2.8         | 5.5  | C <sub>16</sub> H <sub>29</sub> O <sub>12</sub> N <sub>6</sub>                |
|          | 497.1838         | 2.8         | 11.0 | C <sub>15</sub> H <sub>23</sub> O <sub>7</sub> N <sub>13</sub>                |
|          | 497.1867         | -2.9        | 18.5 | C <sub>26</sub> H <sub>25</sub> O <sub>1</sub> N <sub>8</sub> S <sub>1</sub>  |
|          | 497.1867         | -2.9        | 13.0 | C <sub>27</sub> H <sub>31</sub> O <sub>6</sub> N <sub>1</sub> S <sub>1</sub>  |
|          | 497.1867         | -3.0        | 5.5  | C <sub>11</sub> H <sub>29</sub> O <sub>1</sub> N <sub>16</sub> S <sub>3</sub> |
|          | 497.1867         | -3.0        | 0.0  | C <sub>12</sub> H <sub>35</sub> O <sub>6</sub> N <sub>9</sub> S <sub>3</sub>  |

| Mass     | Theoretical<br>Mass | Delta<br>[ppm] | RDB  | Composition                                                                   |
|----------|---------------------|----------------|------|-------------------------------------------------------------------------------|
| 497.1835 | 497.1835            | 3.4            | 8.0  | C <sub>23</sub> H <sub>35</sub> O <sub>3</sub> N <sub>3</sub> S <sub>3</sub>  |
| 497.1870 | 497.1870            | -3.6           | -2.5 | C <sub>5</sub> H <sub>29</sub> O <sub>15</sub> N <sub>12</sub>                |
| 497.1833 | 497.1833            | 3.8            | -0.5 | C <sub>16</sub> H <sub>37</sub> O <sub>11</sub> N <sub>2</sub> S <sub>2</sub> |
| 497.1833 | 497.1833            | 3.8            | 5.0  | C <sub>15</sub> H <sub>31</sub> O <sub>6</sub> N <sub>9</sub> S <sub>2</sub>  |
| 497.1833 | 497.1833            | 3.8            | 10.5 | C <sub>14</sub> H <sub>25</sub> O <sub>1</sub> N <sub>16</sub> S <sub>2</sub> |
| 497.1833 | 497.1833            | 3.8            | 18.0 | C <sub>30</sub> H <sub>27</sub> O <sub>6</sub> N <sub>1</sub>                 |
| 497.1833 | 497.1833            | 3.9            | 23.5 | C <sub>29</sub> H <sub>21</sub> O <sub>1</sub> N <sub>8</sub>                 |
| 497.1872 | 497.1872            | -3.9           | 6.0  | C <sub>12</sub> H <sub>27</sub> O <sub>7</sub> N <sub>13</sub> S <sub>1</sub> |
| 497.1872 | 497.1872            | -4.0           | 0.5  | C <sub>13</sub> H <sub>33</sub> O <sub>12</sub> N <sub>6</sub> S <sub>1</sub> |
| 497.1831 | 497.1831            | 4.1            | 2.0  | C <sub>7</sub> H <sub>27</sub> O <sub>9</sub> N <sub>15</sub> S <sub>1</sub>  |
| 497.1873 | 497.1873            | -4.3           | 9.0  | C <sub>20</sub> H <sub>31</sub> O <sub>4</sub> N <sub>7</sub> S <sub>2</sub>  |
| 497.1874 | 497.1874            | -4.3           | 3.5  | C <sub>21</sub> H <sub>37</sub> O <sub>9</sub> S <sub>2</sub>                 |
| 497.1875 | 497.1875            | -4.7           | 12.0 | C <sub>28</sub> H <sub>35</sub> O <sub>1</sub> N <sub>1</sub> S <sub>3</sub>  |
| 497.1828 | 497.1828            | 4.8            | 17.5 | C <sub>29</sub> H <sub>29</sub> N <sub>4</sub> S <sub>2</sub>                 |

PA1-47 MW=538?  
ASAP(DCM)

# Compound 18

EPSRC National Centre Swansea  
LTQ Orbitrap XL

Thrup  
06/11/2012 11:41:24

BRASHE229-PG-HASP #34-36 RT: 0.95-1.01 AV: 3 SM: 7G NL: 1.17E7  
T: FTMS + p APCI corona Full ms [100.00-800.00]

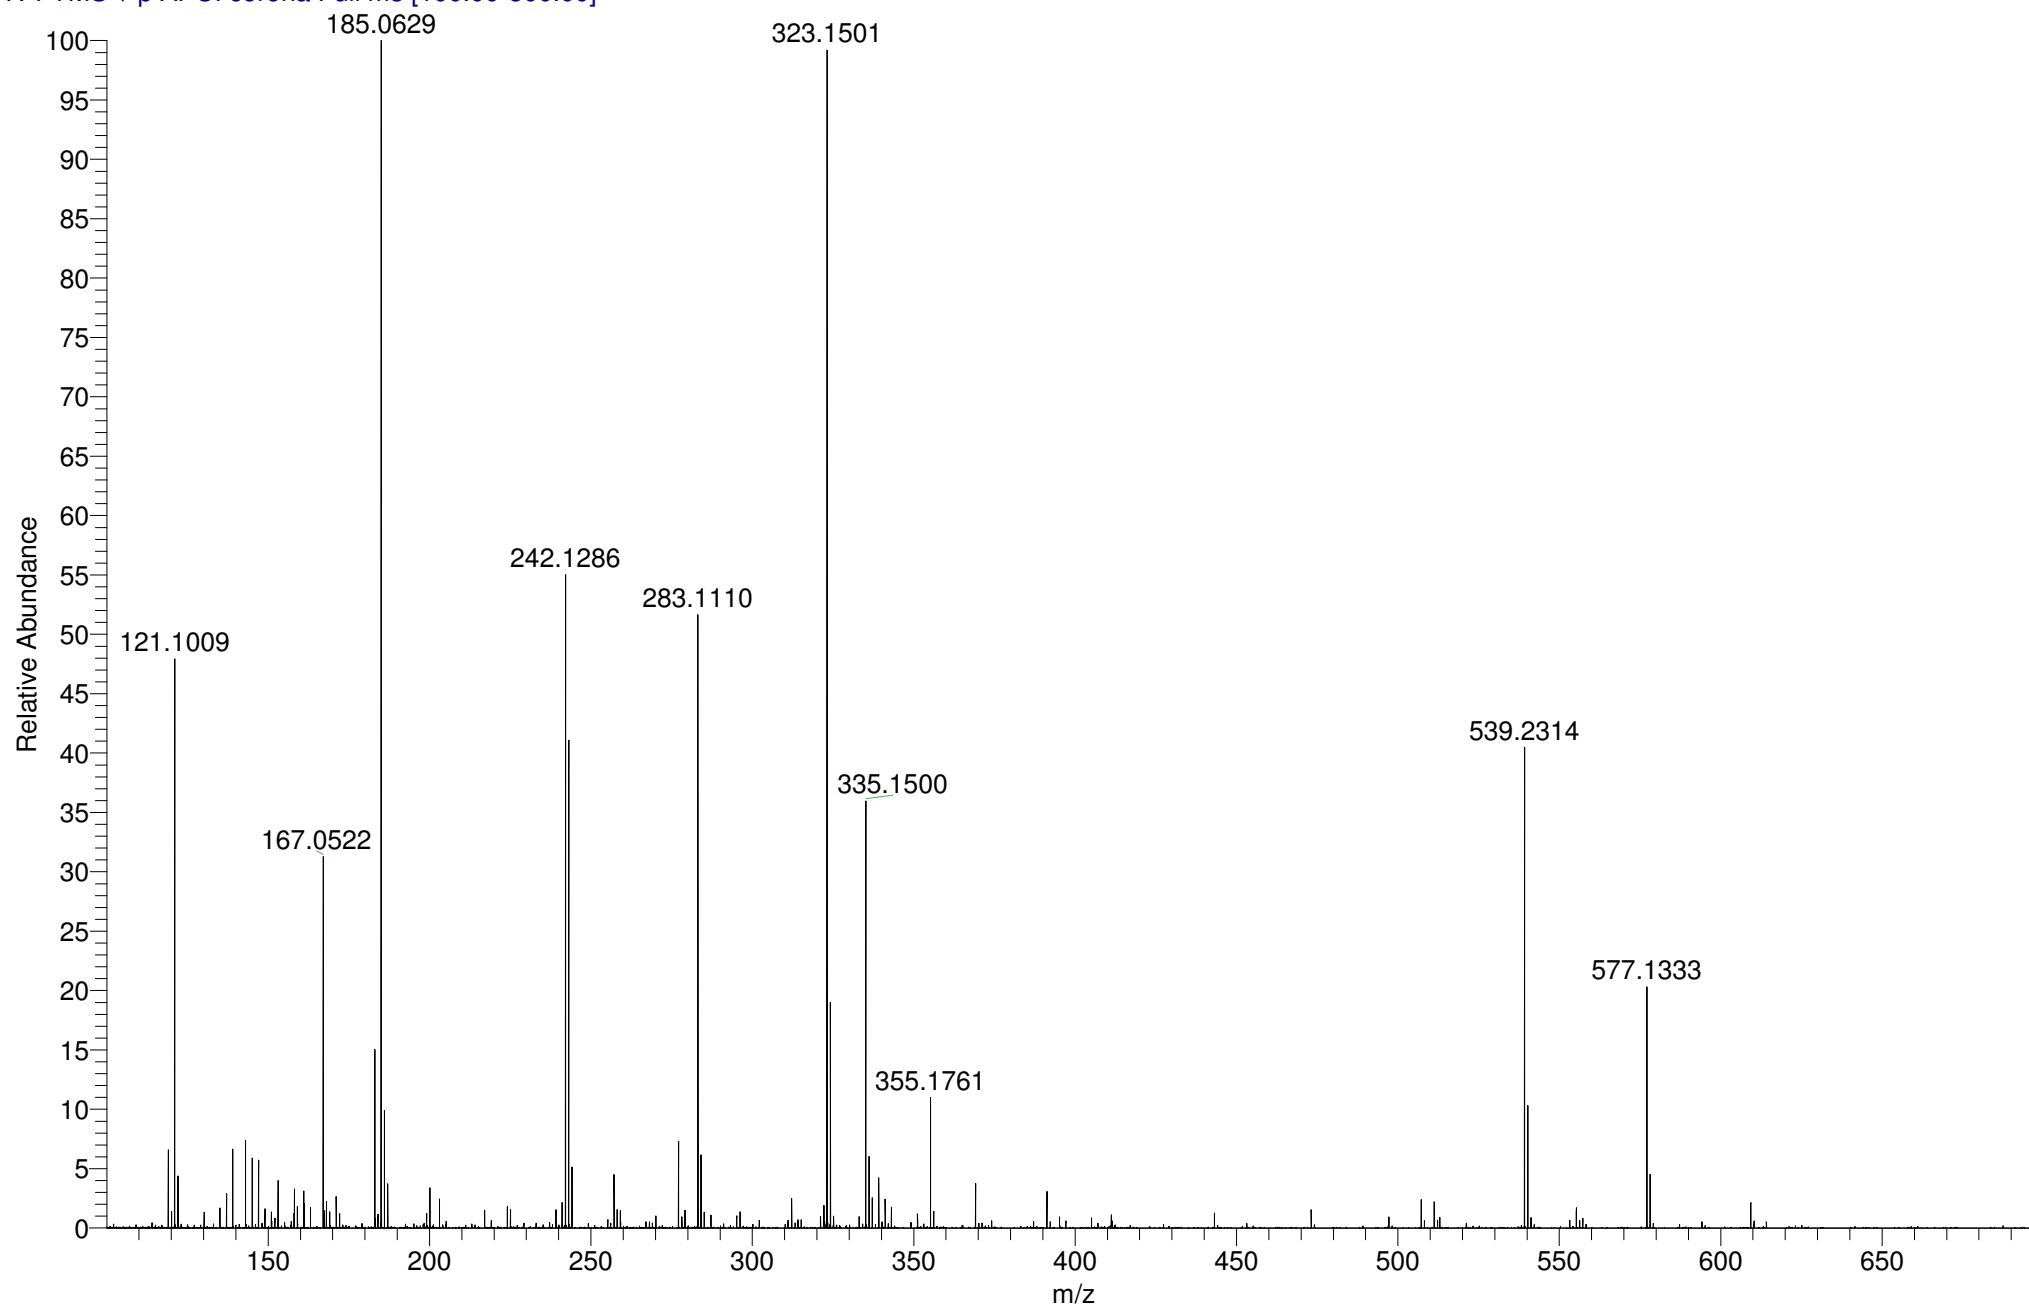



BRASHE229-PG-HASP #34-36 RT: 0.95-1.01 AV: 3 SM: 7G NL: 1.17E7  
T: FTMS + p APCI corona Full ms [100.00-800.00]

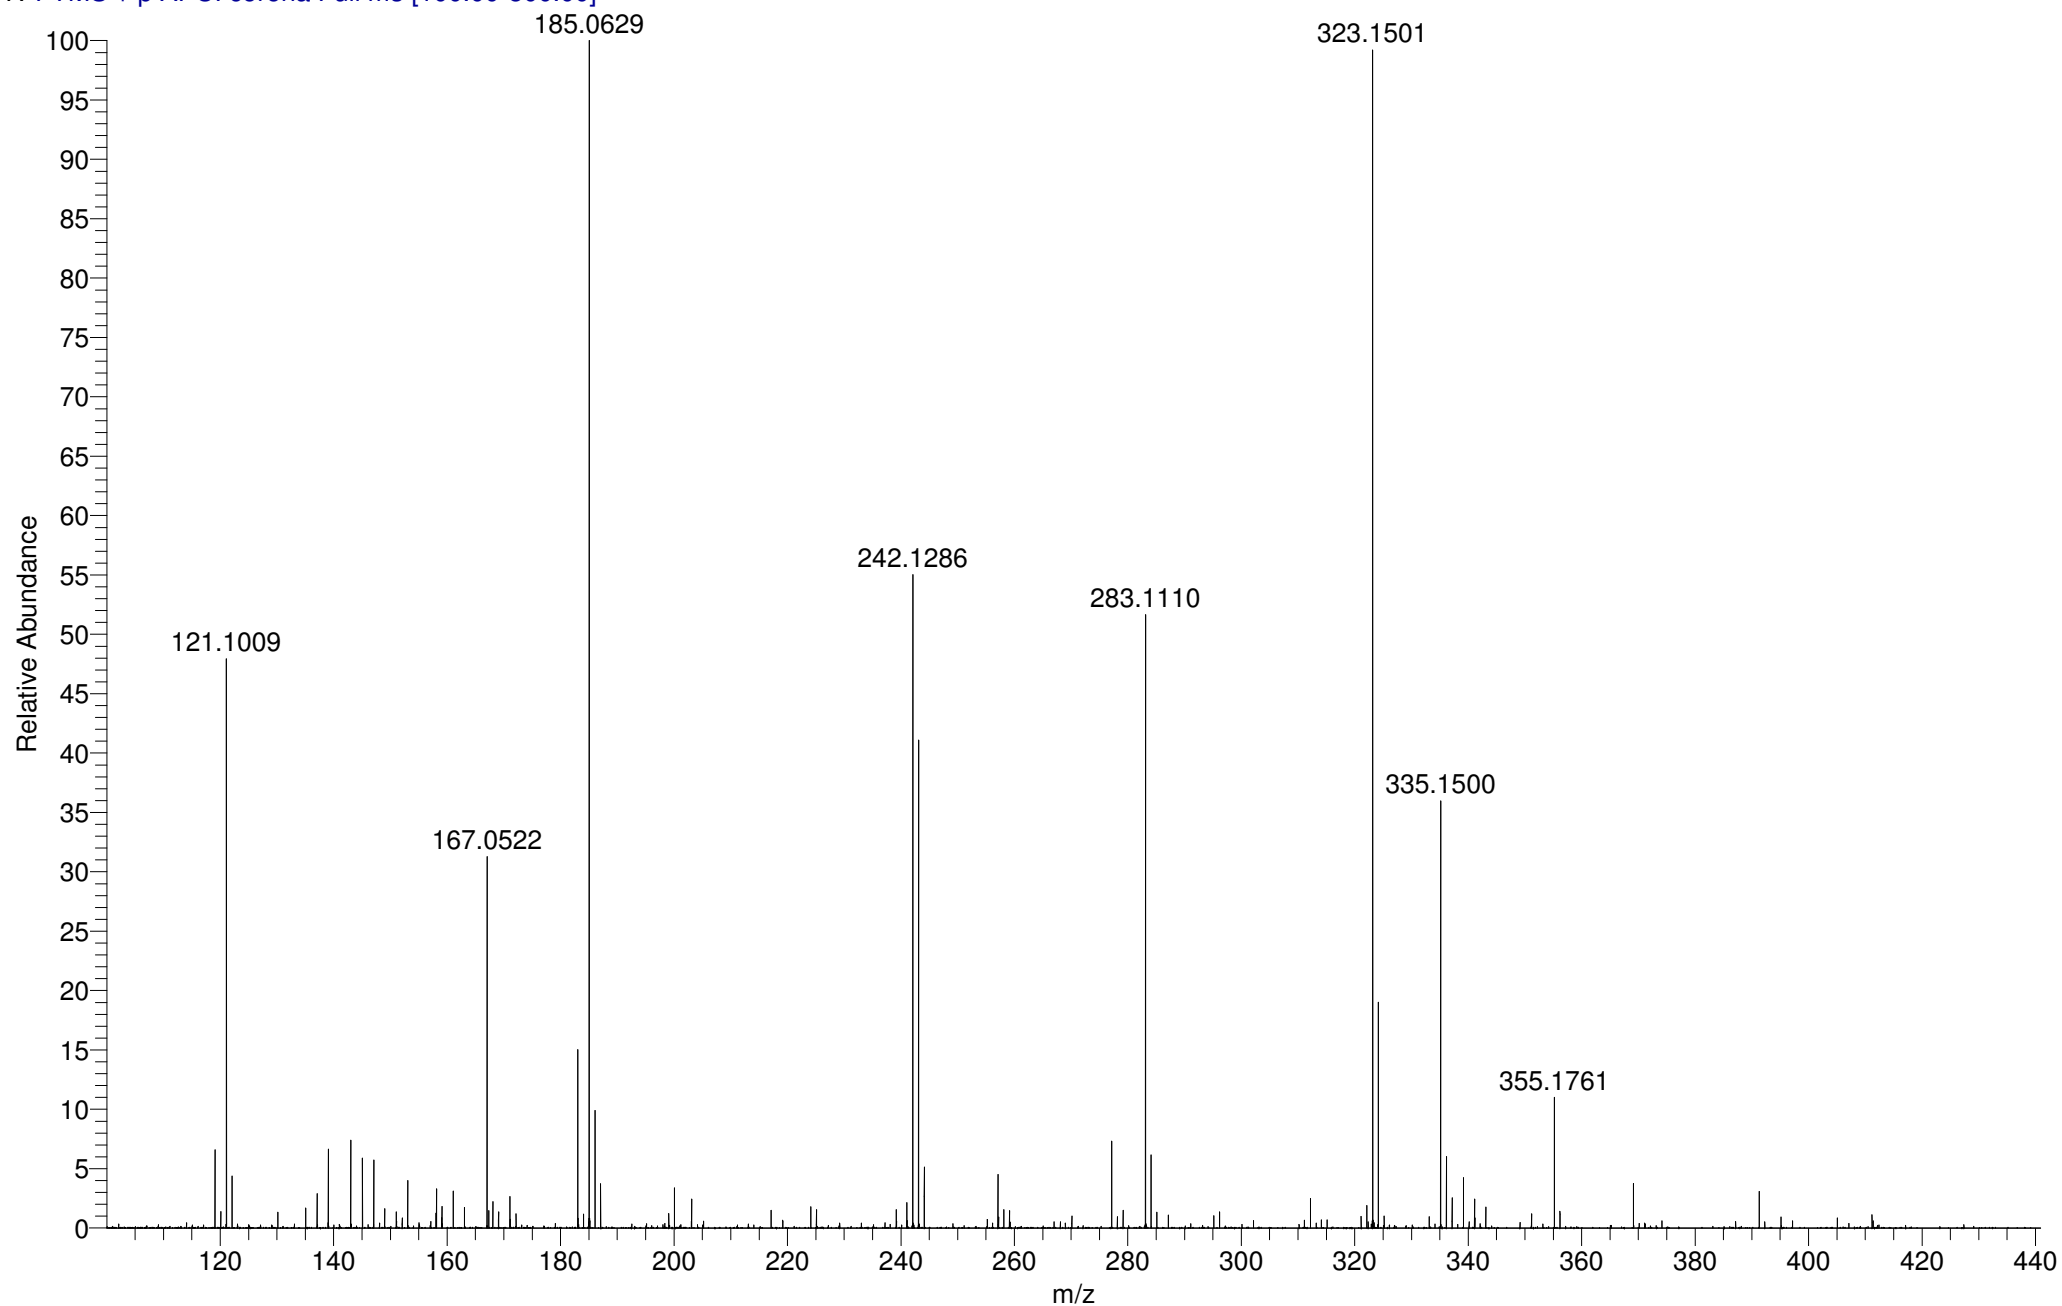

PA1-47 MW=538?  
ASAP(DCM)

EPSRC National Centre Swansea  
LTQ Orbitrap XL

Thrup  
06/11/2012 11:41:24

BRASHE229-PG-HASP #34-36 RT: 0.95-1.01 AV: 3 SM: 7G NL: 4.74E6  
T: FTMS + p APCI corona Full ms [100.00-800.00]

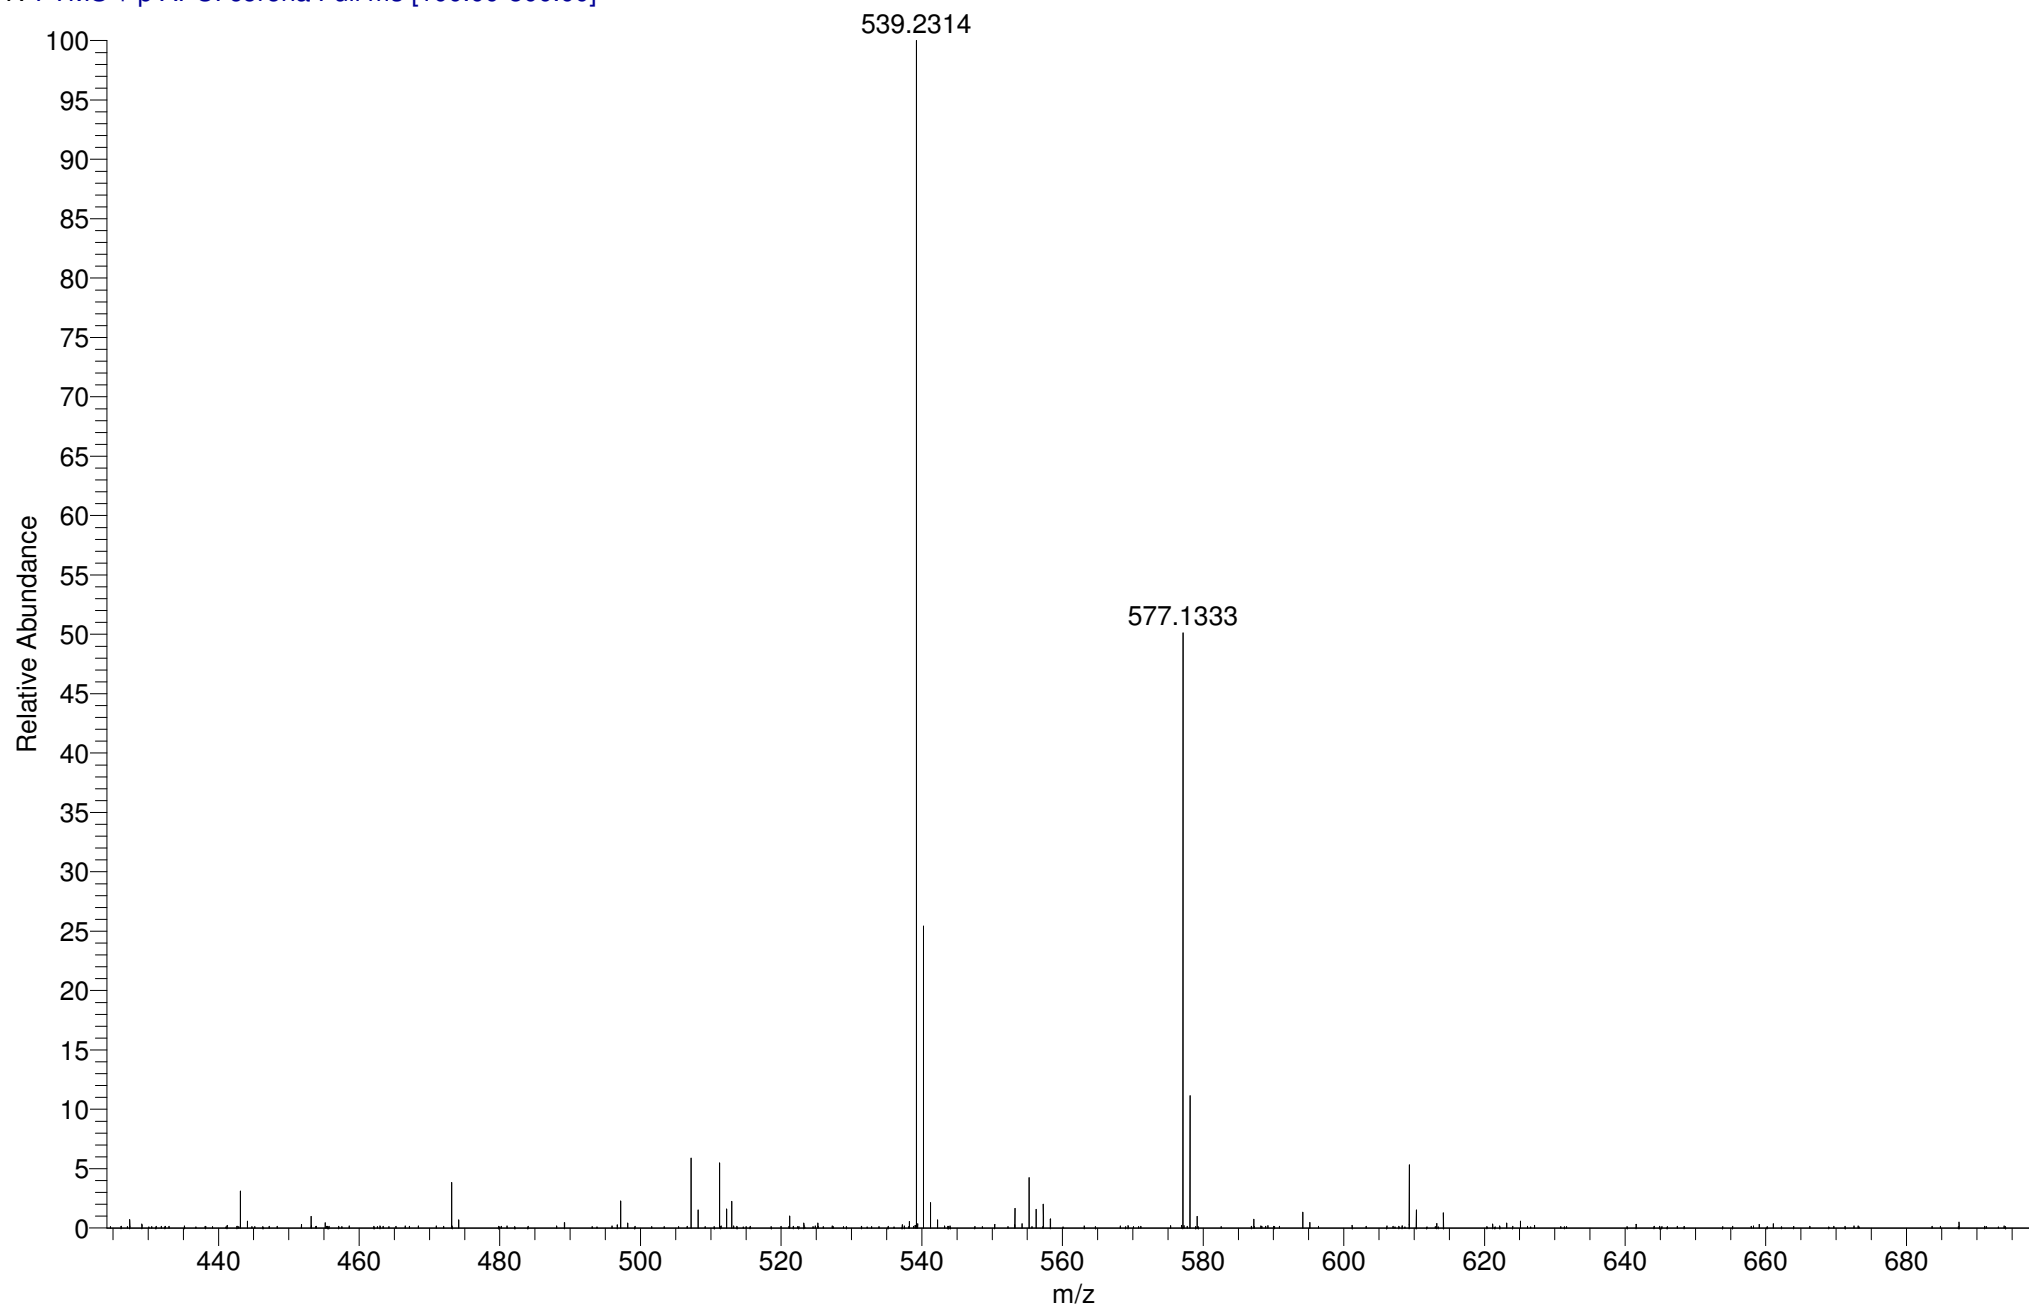

SM: 7G

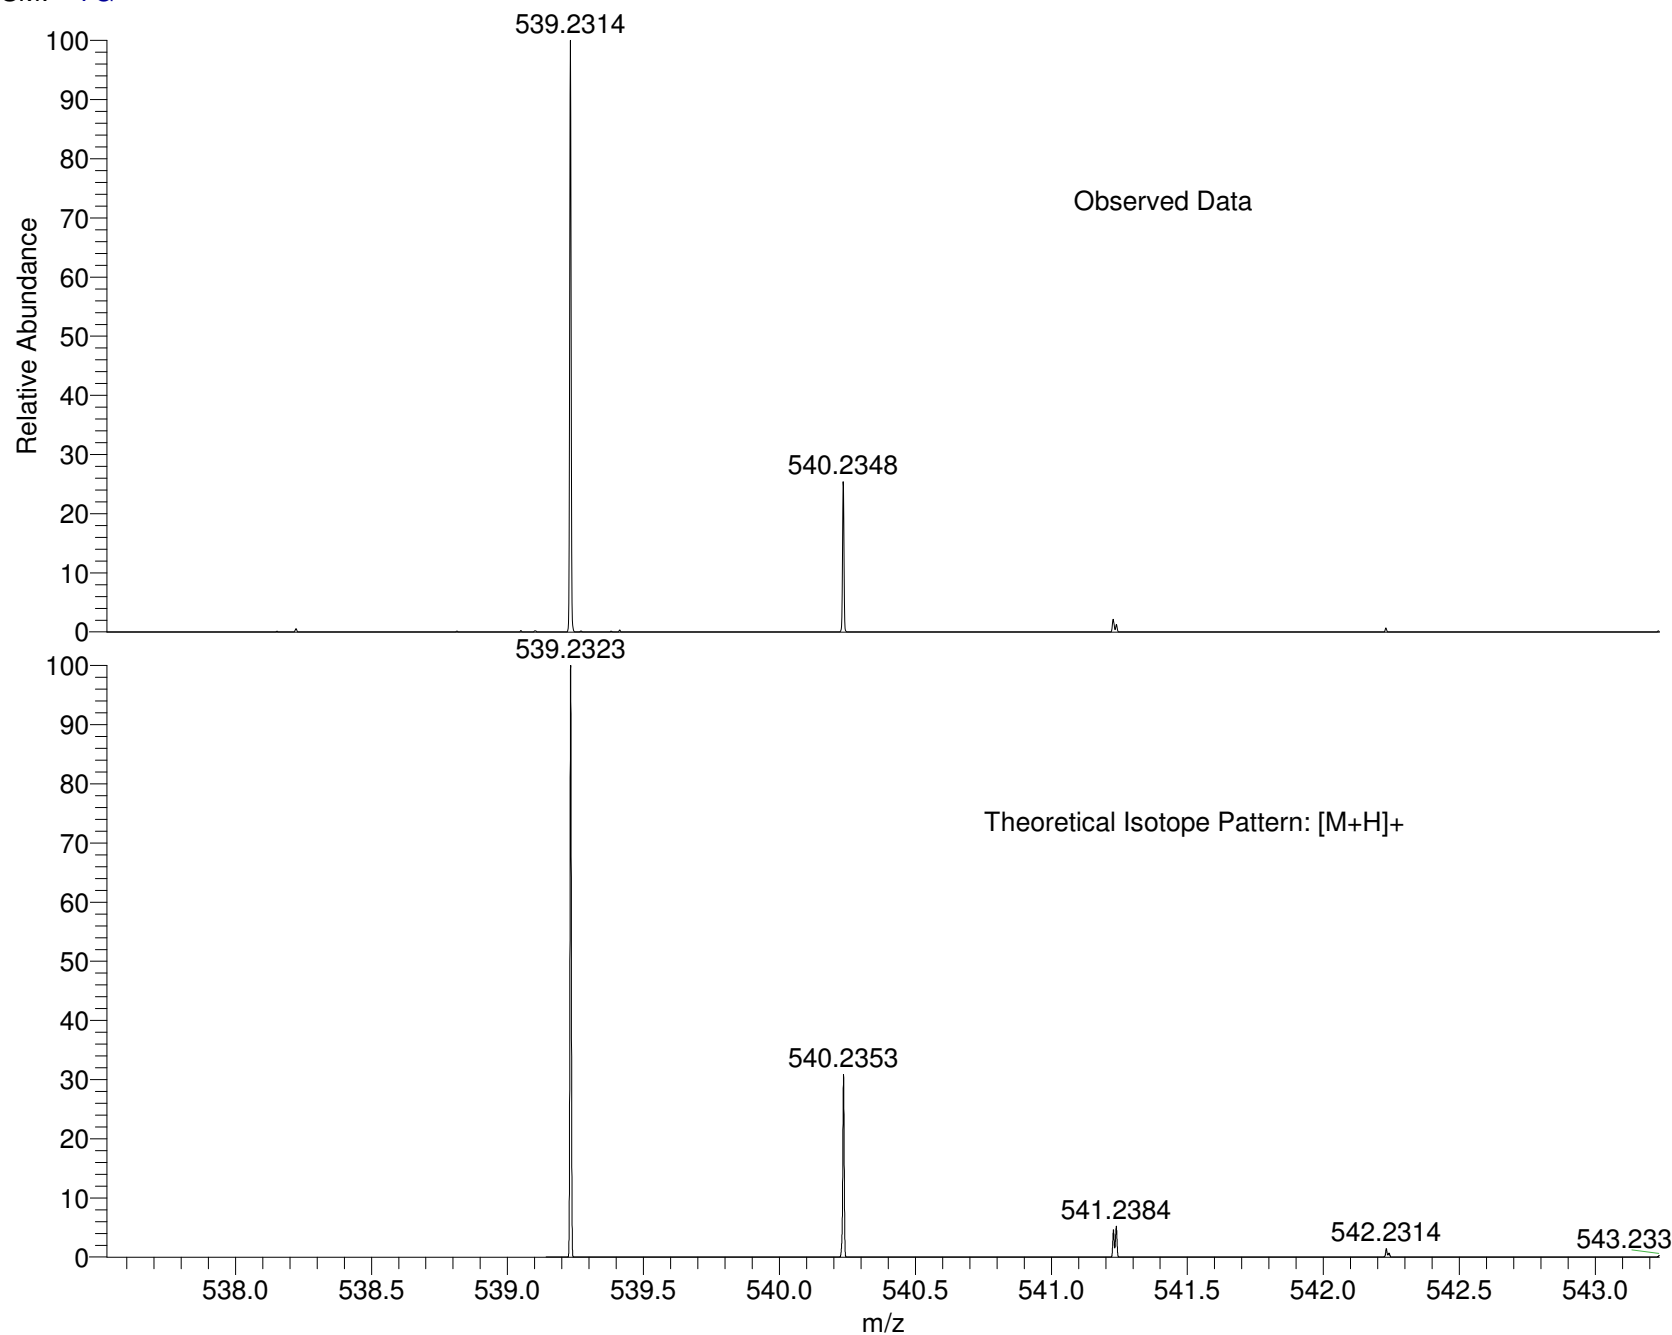

NL:  
4.74E6  
BRASHE229-PG-HASP#34-36  
RT: 0.95-1.01 AV: 3 T: FTMS  
+ p APCI corona Full ms  
[100.00-800.00]

NL:  
1.60E4  
C<sub>28</sub> H<sub>34</sub> N<sub>4</sub> O<sub>5</sub> SH:  
C<sub>28</sub> H<sub>35</sub> N<sub>4</sub> O<sub>5</sub> S<sub>1</sub>  
p (gss, s /p:40) Chrg 1  
R: 100000 Res .Pwr . @FWHM

Isotope:                   Min. . . Max.  
 14 N                       0 . . . .16  
 16 O                       0 . . . .15  
 12 C                       0 . . . .80  
 1 H                         0 . . . .100  
 23 Na                      0 . . . .0  
 32 S                       0 . . . .3  
 Tolerance Window:       +- 5.00 ppm  
 Db/Ring Equiv:           -3.. 100  
 Fits:                      100

N-Rule:   Do not use  
 Charge:   1

| Mass     | Theoretical<br>Mass | Delta<br>[ppm] | RDB  | Composition                                                                    |
|----------|---------------------|----------------|------|--------------------------------------------------------------------------------|
| 539.2314 | 539.2314            | -0.1           | 1.5  | C <sub>12</sub> H <sub>35</sub> O <sub>10</sub> N <sub>12</sub> S <sub>1</sub> |
|          | 539.2316            | -0.3           | 23.0 | C <sub>34</sub> H <sub>29</sub> O <sub>2</sub> N <sub>5</sub>                  |
|          | 539.2316            | -0.4           | 10.0 | C <sub>19</sub> H <sub>33</sub> O <sub>2</sub> N <sub>13</sub> S <sub>2</sub>  |
|          | 539.2316            | -0.4           | 4.5  | C <sub>20</sub> H <sub>39</sub> O <sub>7</sub> N <sub>6</sub> S <sub>2</sub>   |
|          | 539.2311            | 0.5            | 17.0 | C <sub>34</sub> H <sub>37</sub> O <sub>1</sub> N <sub>1</sub> S <sub>2</sub>   |
|          | 539.2318            | -0.7           | 7.5  | C <sub>28</sub> H <sub>43</sub> O <sub>4</sub> S <sub>3</sub>                  |
|          | 539.2310            | 0.8            | 1.0  | C <sub>11</sub> H <sub>37</sub> O <sub>4</sub> N <sub>15</sub> S <sub>3</sub>  |
|          | 539.2309            | 0.9            | 8.5  | C <sub>27</sub> H <sub>39</sub> O <sub>9</sub> S <sub>1</sub>                  |
|          | 539.2309            | 0.9            | 14.0 | C <sub>26</sub> H <sub>33</sub> O <sub>4</sub> N <sub>7</sub> S <sub>1</sub>   |
|          | 539.2307            | 1.2            | 5.5  | C <sub>19</sub> H <sub>35</sub> O <sub>12</sub> N <sub>6</sub>                 |
|          | 539.2307            | 1.2            | 11.0 | C <sub>18</sub> H <sub>29</sub> O <sub>7</sub> N <sub>13</sub>                 |
|          | 539.2321            | -1.3           | 10.5 | C <sub>20</sub> H <sub>31</sub> O <sub>8</sub> N <sub>10</sub>                 |
|          | 539.2321            | -1.3           | 5.0  | C <sub>21</sub> H <sub>37</sub> O <sub>13</sub> N <sub>3</sub>                 |
|          | 539.2323            | -1.6           | 19.0 | C <sub>27</sub> H <sub>29</sub> N <sub>11</sub> S <sub>1</sub>                 |
|          | 539.2323            | -1.6           | 13.5 | C <sub>28</sub> H <sub>35</sub> O <sub>5</sub> N <sub>4</sub> S <sub>1</sub>   |
|          | 539.2323            | -1.7           | 0.5  | C <sub>13</sub> H <sub>39</sub> O <sub>5</sub> N <sub>12</sub> S <sub>3</sub>  |
|          | 539.2305            | 1.8            | 8.0  | C <sub>26</sub> H <sub>41</sub> O <sub>3</sub> N <sub>3</sub> S <sub>3</sub>   |
|          | 539.2303            | 2.1            | -0.5 | C <sub>19</sub> H <sub>43</sub> O <sub>11</sub> N <sub>2</sub> S <sub>2</sub>  |
|          | 539.2303            | 2.1            | 5.0  | C <sub>18</sub> H <sub>37</sub> O <sub>6</sub> N <sub>9</sub> S <sub>2</sub>   |
|          | 539.2303            | 2.1            | 10.5 | C <sub>17</sub> H <sub>31</sub> O <sub>1</sub> N <sub>16</sub> S <sub>2</sub>  |
|          | 539.2302            | 2.2            | 18.0 | C <sub>33</sub> H <sub>33</sub> O <sub>6</sub> N <sub>1</sub>                  |
|          | 539.2302            | 2.2            | 23.5 | C <sub>32</sub> H <sub>27</sub> O <sub>1</sub> N <sub>8</sub>                  |
|          | 539.2326            | -2.2           | -2.0 | C <sub>6</sub> H <sub>33</sub> O <sub>14</sub> N <sub>15</sub>                 |
|          | 539.2301            | 2.4            | 2.0  | C <sub>10</sub> H <sub>33</sub> O <sub>9</sub> N <sub>15</sub> S <sub>1</sub>  |
|          | 539.2328            | -2.5           | 6.5  | C <sub>13</sub> H <sub>31</sub> O <sub>6</sub> N <sub>16</sub> S <sub>1</sub>  |
|          | 539.2328            | -2.5           | 1.0  | C <sub>14</sub> H <sub>37</sub> O <sub>11</sub> N <sub>9</sub> S <sub>1</sub>  |
|          | 539.2329            | -2.8           | 22.5 | C <sub>36</sub> H <sub>31</sub> O <sub>3</sub> N <sub>2</sub>                  |
|          | 539.2330            | -2.9           | 9.5  | C <sub>21</sub> H <sub>35</sub> O <sub>3</sub> N <sub>10</sub> S <sub>2</sub>  |
|          | 539.2330            | -2.9           | 4.0  | C <sub>22</sub> H <sub>41</sub> O <sub>8</sub> N <sub>3</sub> S <sub>2</sub>   |
|          | 539.2298            | 3.0            | 17.5 | C <sub>32</sub> H <sub>35</sub> N <sub>4</sub> S <sub>2</sub>                  |
|          | 539.2331            | -3.2           | 12.5 | C <sub>29</sub> H <sub>39</sub> N <sub>4</sub> S <sub>3</sub>                  |

| Mass     | Theoretical<br>Mass | Delta<br>[ppm] | RDB  | Composition                                                                   |
|----------|---------------------|----------------|------|-------------------------------------------------------------------------------|
| 539.2296 | 539.2296            | 3.4            | 9.0  | C <sub>25</sub> H <sub>37</sub> O <sub>8</sub> N <sub>3</sub> S <sub>1</sub>  |
| 539.2296 | 539.2296            | 3.4            | 14.5 | C <sub>24</sub> H <sub>31</sub> O <sub>3</sub> N <sub>10</sub> S <sub>1</sub> |
| 539.2294 | 539.2294            | 3.7            | 6.0  | C <sub>17</sub> H <sub>33</sub> O <sub>11</sub> N <sub>9</sub>                |
| 539.2294 | 539.2294            | 3.7            | 11.5 | C <sub>16</sub> H <sub>27</sub> O <sub>6</sub> N <sub>16</sub>                |
| 539.2334 | 539.2334            | -3.7           | 15.5 | C <sub>21</sub> H <sub>27</sub> O <sub>4</sub> N <sub>14</sub>                |
| 539.2334 | 539.2334            | -3.8           | 10.0 | C <sub>22</sub> H <sub>33</sub> O <sub>9</sub> N <sub>7</sub>                 |
| 539.2334 | 539.2334            | -3.8           | 4.5  | C <sub>23</sub> H <sub>39</sub> O <sub>14</sub>                               |
| 539.2335 | 539.2335            | -3.8           | -3.0 | C <sub>7</sub> H <sub>37</sub> O <sub>9</sub> N <sub>15</sub> S <sub>2</sub>  |
| 539.2336 | 539.2336            | -4.1           | 18.5 | C <sub>29</sub> H <sub>31</sub> O <sub>1</sub> N <sub>8</sub> S <sub>1</sub>  |
| 539.2336 | 539.2336            | -4.1           | 13.0 | C <sub>30</sub> H <sub>37</sub> O <sub>6</sub> N <sub>1</sub> S <sub>1</sub>  |
| 539.2336 | 539.2336            | -4.2           | 5.5  | C <sub>14</sub> H <sub>35</sub> O <sub>1</sub> N <sub>16</sub> S <sub>3</sub> |
| 539.2336 | 539.2336            | -4.2           | 0.0  | C <sub>15</sub> H <sub>41</sub> O <sub>6</sub> N <sub>9</sub> S <sub>3</sub>  |
| 539.2291 | 539.2291            | 4.2            | 8.5  | C <sub>24</sub> H <sub>39</sub> O <sub>2</sub> N <sub>6</sub> S <sub>3</sub>  |
| 539.2289 | 539.2289            | 4.6            | 0.0  | C <sub>17</sub> H <sub>41</sub> O <sub>10</sub> N <sub>5</sub> S <sub>2</sub> |
| 539.2289 | 539.2289            | 4.6            | 5.5  | C <sub>16</sub> H <sub>35</sub> O <sub>5</sub> N <sub>12</sub> S <sub>2</sub> |
| 539.2289 | 539.2289            | 4.6            | 18.5 | C <sub>31</sub> H <sub>31</sub> O <sub>5</sub> N <sub>4</sub>                 |
| 539.2289 | 539.2289            | 4.7            | 24.0 | C <sub>30</sub> H <sub>25</sub> N <sub>11</sub>                               |
| 539.2339 | 539.2339            | -4.7           | -2.5 | C <sub>8</sub> H <sub>35</sub> O <sub>15</sub> N <sub>12</sub>                |
| 539.2288 | 539.2288            | 4.9            | -3.0 | C <sub>9</sub> H <sub>37</sub> O <sub>13</sub> N <sub>11</sub> S <sub>1</sub> |

BRASHE253-OV-HNESN #3-7 RT: 0.37-0.74 AV: 5 SM: 7G NL: 2.25E4

T: FTMS - p NSI Full ms [120.00-2000.00]

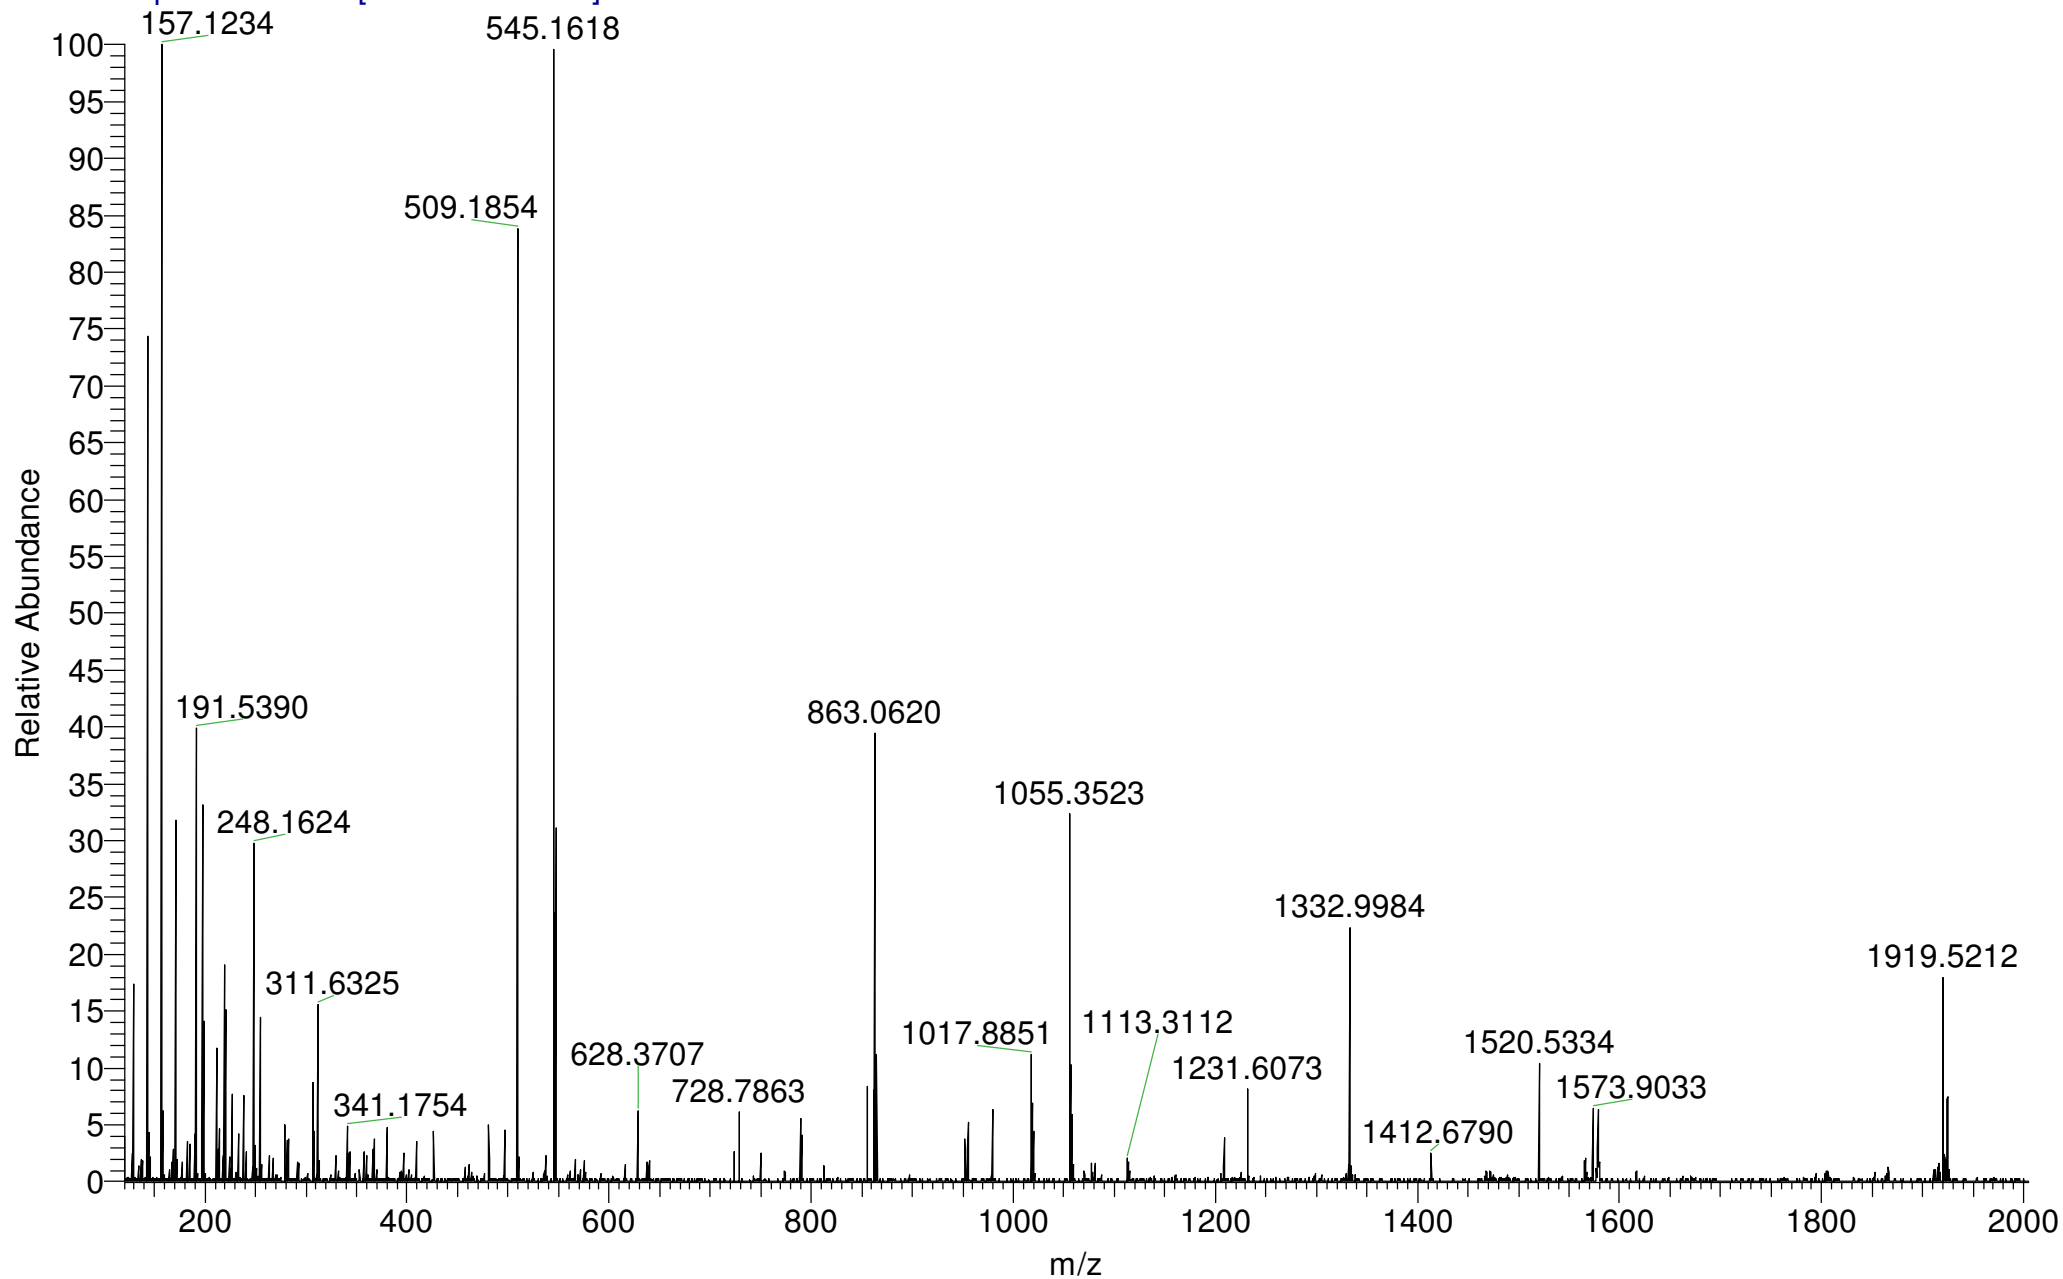

BRASHE253-OV-HNESN #3-7 RT: 0.37-0.74 AV: 5 SM: 7G NL: 1.89E4

T: FTMS - p NSI Full ms [120.00-2000.00]

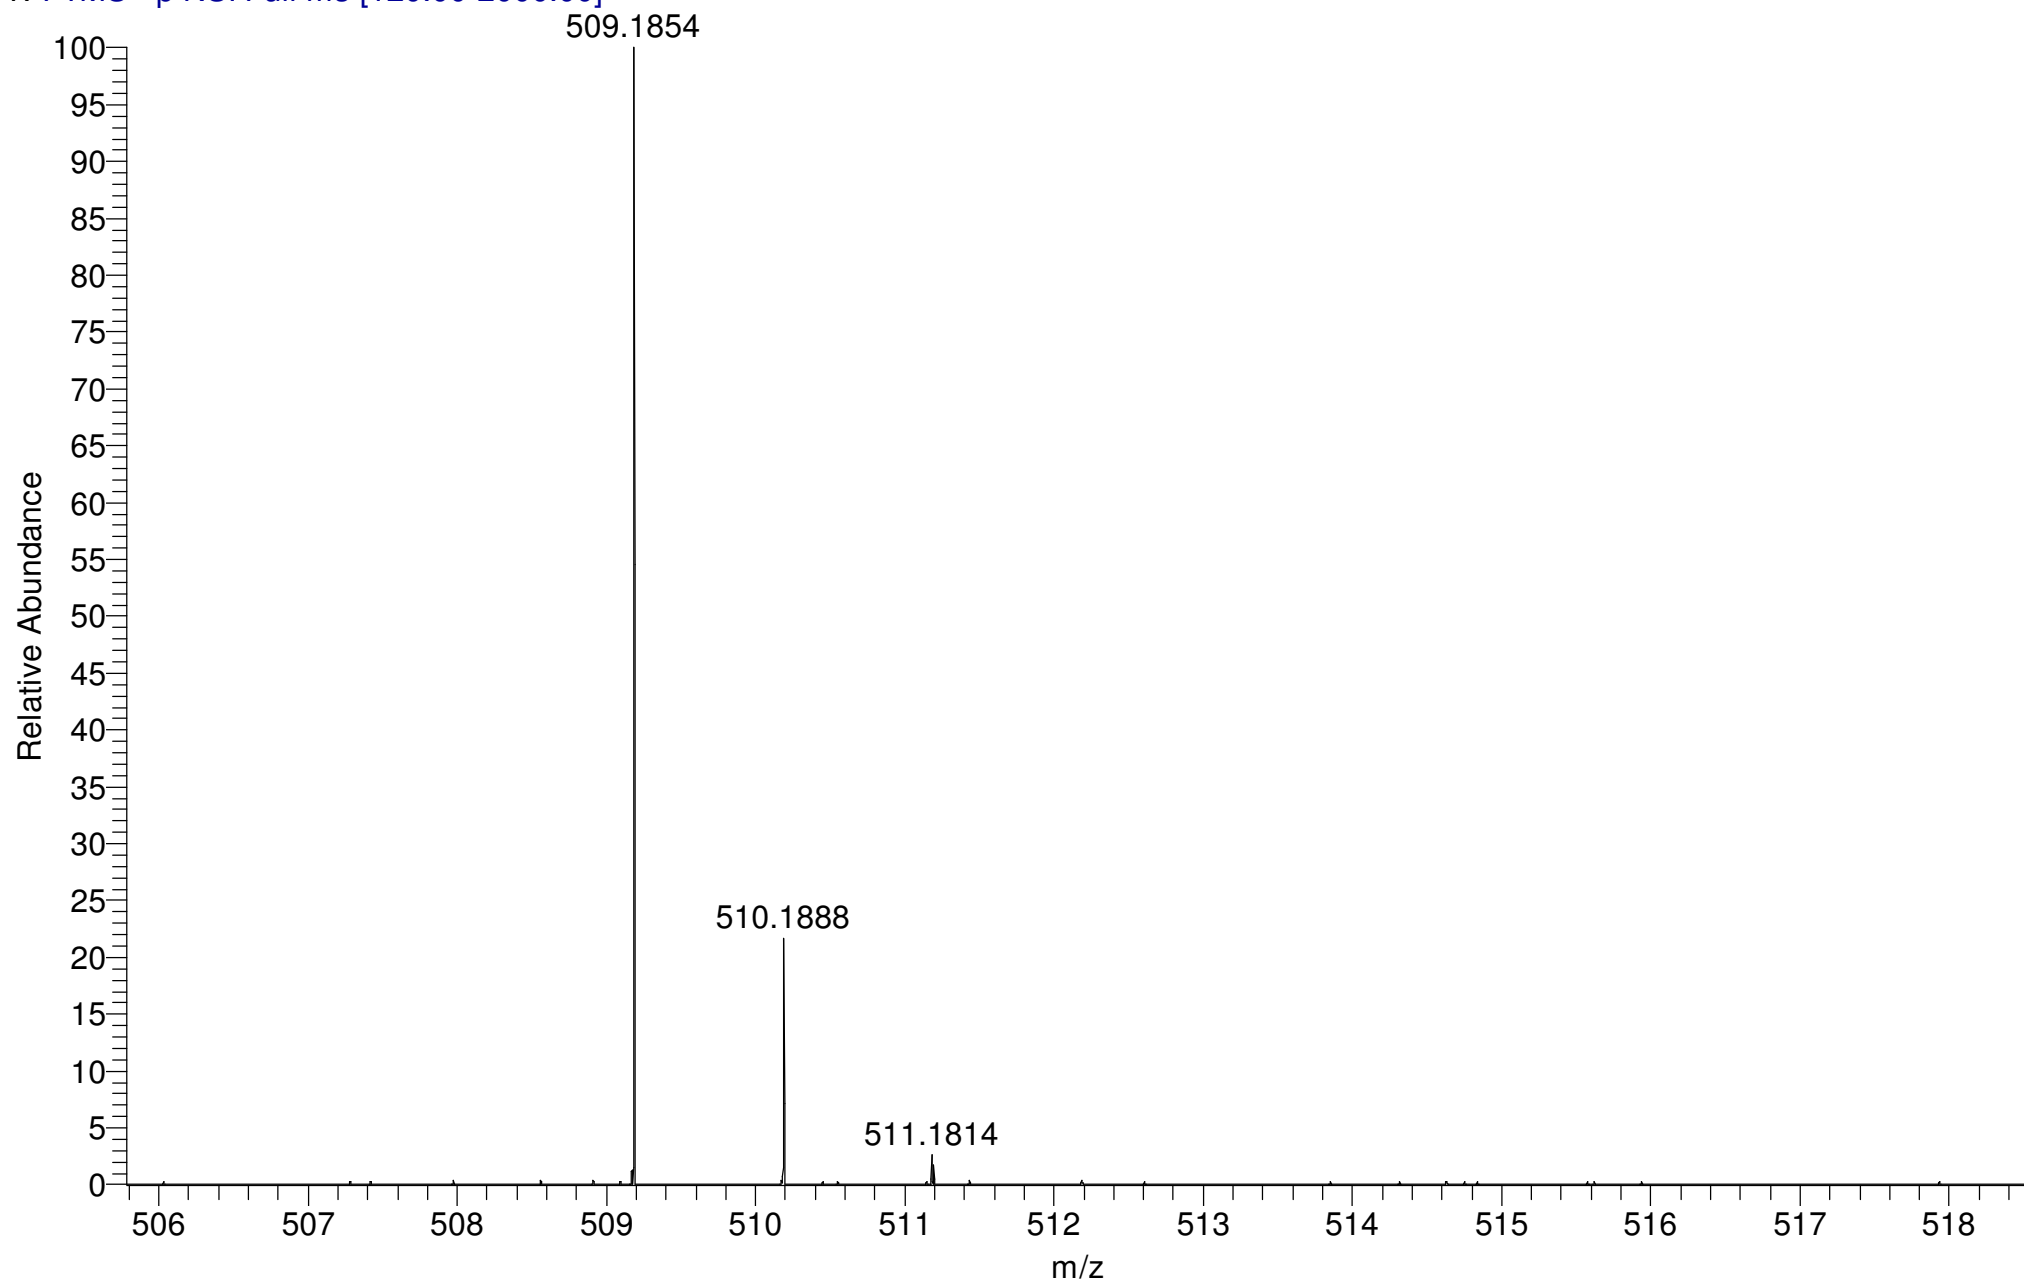

Isotope:           Min. .. Max.  
 12 C               0....60  
 1 H                0....70  
 14 N               0....15  
 16 O               0....15  
 23 Na              0....0  
 32 S               0....3  
 Tolerance Window: +- 5.00 ppm  
 Db/Ring Equiv:   -3.. 100  
 Fits:             100

N-Rule: Do not use  
 Charge: -1

| Mass     | Theoretical Mass | Delta [ppm] | RDB  | Composition                                                                    |
|----------|------------------|-------------|------|--------------------------------------------------------------------------------|
| 509.1854 | 509.1853         | 0.3         | 18.0 | C <sub>32</sub> H <sub>31</sub> O <sub>1</sub> N <sub>1</sub> S <sub>2</sub>   |
|          | 509.1856         | -0.4        | 2.5  | C <sub>10</sub> H <sub>29</sub> O <sub>10</sub> N <sub>12</sub> S <sub>1</sub> |
|          | 509.1856         | -0.4        | -3.0 | C <sub>11</sub> H <sub>35</sub> O <sub>15</sub> N <sub>5</sub> S <sub>1</sub>  |
|          | 509.1851         | 0.6         | 2.0  | C <sub>9</sub> H <sub>31</sub> O <sub>4</sub> N <sub>15</sub> S <sub>3</sub>   |
|          | 509.1857         | -0.6        | 24.0 | C <sub>32</sub> H <sub>23</sub> O <sub>2</sub> N <sub>5</sub>                  |
|          | 509.1851         | 0.6         | 9.5  | C <sub>25</sub> H <sub>33</sub> O <sub>9</sub> S <sub>1</sub>                  |
|          | 509.1851         | 0.6         | 15.0 | C <sub>24</sub> H <sub>27</sub> O <sub>4</sub> N <sub>7</sub> S <sub>1</sub>   |
|          | 509.1858         | -0.7        | 11.0 | C <sub>17</sub> H <sub>27</sub> O <sub>2</sub> N <sub>13</sub> S <sub>2</sub>  |
|          | 509.1858         | -0.7        | 5.5  | C <sub>18</sub> H <sub>33</sub> O <sub>7</sub> N <sub>6</sub> S <sub>2</sub>   |
|          | 509.1849         | 1.0         | 6.5  | C <sub>17</sub> H <sub>29</sub> O <sub>12</sub> N <sub>6</sub>                 |
|          | 509.1849         | 1.0         | 12.0 | C <sub>16</sub> H <sub>23</sub> O <sub>7</sub> N <sub>13</sub>                 |
|          | 509.1859         | -1.1        | 8.5  | C <sub>26</sub> H <sub>37</sub> O <sub>4</sub> S <sub>3</sub>                  |
|          | 509.1846         | 1.6         | 9.0  | C <sub>24</sub> H <sub>35</sub> O <sub>3</sub> N <sub>3</sub> S <sub>3</sub>   |
|          | 509.1862         | -1.6        | 11.5 | C <sub>18</sub> H <sub>25</sub> O <sub>8</sub> N <sub>10</sub>                 |
|          | 509.1862         | -1.6        | 6.0  | C <sub>19</sub> H <sub>31</sub> O <sub>13</sub> N <sub>3</sub>                 |
|          | 509.1844         | 1.9         | 0.5  | C <sub>17</sub> H <sub>37</sub> O <sub>11</sub> N <sub>2</sub> S <sub>2</sub>  |
|          | 509.1844         | 1.9         | 6.0  | C <sub>16</sub> H <sub>31</sub> O <sub>6</sub> N <sub>9</sub> S <sub>2</sub>   |
|          | 509.1864         | -2.0        | 20.0 | C <sub>25</sub> H <sub>23</sub> N <sub>11</sub> S <sub>1</sub>                 |
|          | 509.1864         | -2.0        | 14.5 | C <sub>26</sub> H <sub>29</sub> O <sub>5</sub> N <sub>4</sub> S <sub>1</sub>   |
|          | 509.1844         | 2.0         | 19.0 | C <sub>31</sub> H <sub>27</sub> O <sub>6</sub> N <sub>1</sub>                  |
|          | 509.1844         | 2.0         | 24.5 | C <sub>30</sub> H <sub>21</sub> O <sub>1</sub> N <sub>8</sub>                  |
|          | 509.1864         | -2.1        | 1.5  | C <sub>11</sub> H <sub>33</sub> O <sub>5</sub> N <sub>12</sub> S <sub>3</sub>  |
|          | 509.1842         | 2.3         | -2.5 | C <sub>9</sub> H <sub>33</sub> O <sub>14</sub> N <sub>8</sub> S <sub>1</sub>   |
|          | 509.1842         | 2.3         | 3.0  | C <sub>8</sub> H <sub>27</sub> O <sub>9</sub> N <sub>15</sub> S <sub>1</sub>   |
|          | 509.1867         | -2.6        | -1.0 | C <sub>4</sub> H <sub>27</sub> O <sub>14</sub> N <sub>15</sub>                 |
|          | 509.1839         | 2.9         | 18.5 | C <sub>30</sub> H <sub>29</sub> N <sub>4</sub> S <sub>2</sub>                  |
|          | 509.1869         | -3.0        | 2.0  | C <sub>12</sub> H <sub>31</sub> O <sub>11</sub> N <sub>9</sub> S <sub>1</sub>  |
|          | 509.1838         | 3.2         | -3.0 | C <sub>8</sub> H <sub>35</sub> O <sub>8</sub> N <sub>11</sub> S <sub>3</sub>   |
|          | 509.1871         | -3.3        | 23.5 | C <sub>34</sub> H <sub>25</sub> O <sub>3</sub> N <sub>2</sub>                  |
|          | 509.1837         | 3.3         | 10.0 | C <sub>23</sub> H <sub>31</sub> O <sub>8</sub> N <sub>3</sub> S <sub>1</sub>   |
|          | 509.1837         | 3.3         | 15.5 | C <sub>22</sub> H <sub>25</sub> O <sub>3</sub> N <sub>10</sub> S <sub>1</sub>  |



| Mass     | Theoretical<br>Mass | Delta<br>[ppm] | RDB  | Composition                                                                   |
|----------|---------------------|----------------|------|-------------------------------------------------------------------------------|
| 509.1871 | 509.1871            | -3.3           | 10.5 | C <sub>19</sub> H <sub>29</sub> O <sub>3</sub> N <sub>10</sub> S <sub>2</sub> |
| 509.1871 | 509.1871            | -3.3           | 5.0  | C <sub>20</sub> H <sub>35</sub> O <sub>8</sub> N <sub>3</sub> S <sub>2</sub>  |
| 509.1836 | 509.1836            | 3.6            | 7.0  | C <sub>15</sub> H <sub>27</sub> O <sub>11</sub> N <sub>9</sub>                |
| 509.1873 | 509.1873            | -3.7           | 13.5 | C <sub>27</sub> H <sub>33</sub> N <sub>4</sub> S <sub>3</sub>                 |
| 509.1833 | 509.1833            | 4.2            | 9.5  | C <sub>22</sub> H <sub>33</sub> O <sub>2</sub> N <sub>6</sub> S <sub>3</sub>  |
| 509.1876 | 509.1876            | -4.3           | 16.5 | C <sub>19</sub> H <sub>21</sub> O <sub>4</sub> N <sub>14</sub>                |
| 509.1876 | 509.1876            | -4.3           | 11.0 | C <sub>20</sub> H <sub>27</sub> O <sub>9</sub> N <sub>7</sub>                 |
| 509.1876 | 509.1876            | -4.3           | 5.5  | C <sub>21</sub> H <sub>33</sub> O <sub>14</sub>                               |
| 509.1876 | 509.1876            | -4.3           | -2.0 | C <sub>5</sub> H <sub>31</sub> O <sub>9</sub> N <sub>15</sub> S <sub>2</sub>  |
| 509.1831 | 509.1831            | 4.6            | 1.0  | C <sub>15</sub> H <sub>35</sub> O <sub>10</sub> N <sub>5</sub> S <sub>2</sub> |
| 509.1831 | 509.1831            | 4.6            | 6.5  | C <sub>14</sub> H <sub>29</sub> O <sub>5</sub> N <sub>12</sub> S <sub>2</sub> |
| 509.1878 | 509.1878            | -4.6           | 19.5 | C <sub>27</sub> H <sub>25</sub> O <sub>1</sub> N <sub>8</sub> S <sub>1</sub>  |
| 509.1878 | 509.1878            | -4.6           | 14.0 | C <sub>28</sub> H <sub>31</sub> O <sub>6</sub> N <sub>1</sub> S <sub>1</sub>  |
| 509.1830 | 509.1830            | 4.6            | 19.5 | C <sub>29</sub> H <sub>25</sub> O <sub>5</sub> N <sub>4</sub>                 |
| 509.1830 | 509.1830            | 4.6            | 25.0 | C <sub>28</sub> H <sub>19</sub> N <sub>11</sub>                               |
| 509.1878 | 509.1878            | -4.7           | 1.0  | C <sub>13</sub> H <sub>35</sub> O <sub>6</sub> N <sub>9</sub> S <sub>3</sub>  |
| 509.1829 | 509.1829            | 4.9            | -2.0 | C <sub>7</sub> H <sub>31</sub> O <sub>13</sub> N <sub>11</sub> S <sub>1</sub> |

aet9-19 MW=552?  
(DCM)/MeOH + NH4OAc

# Compound 20

EPSRC National Centre Swansea  
LTQ Orbitrap XL

adam throup  
14/01/2013 16:40:17

BRASHE246-OJ-HNESP #37-50 RT: 0.95-1.29 AV: 13 SM: 7G NL: 2.62E7

T: FTMS + p NSI Full ms [120.00-2000.00]

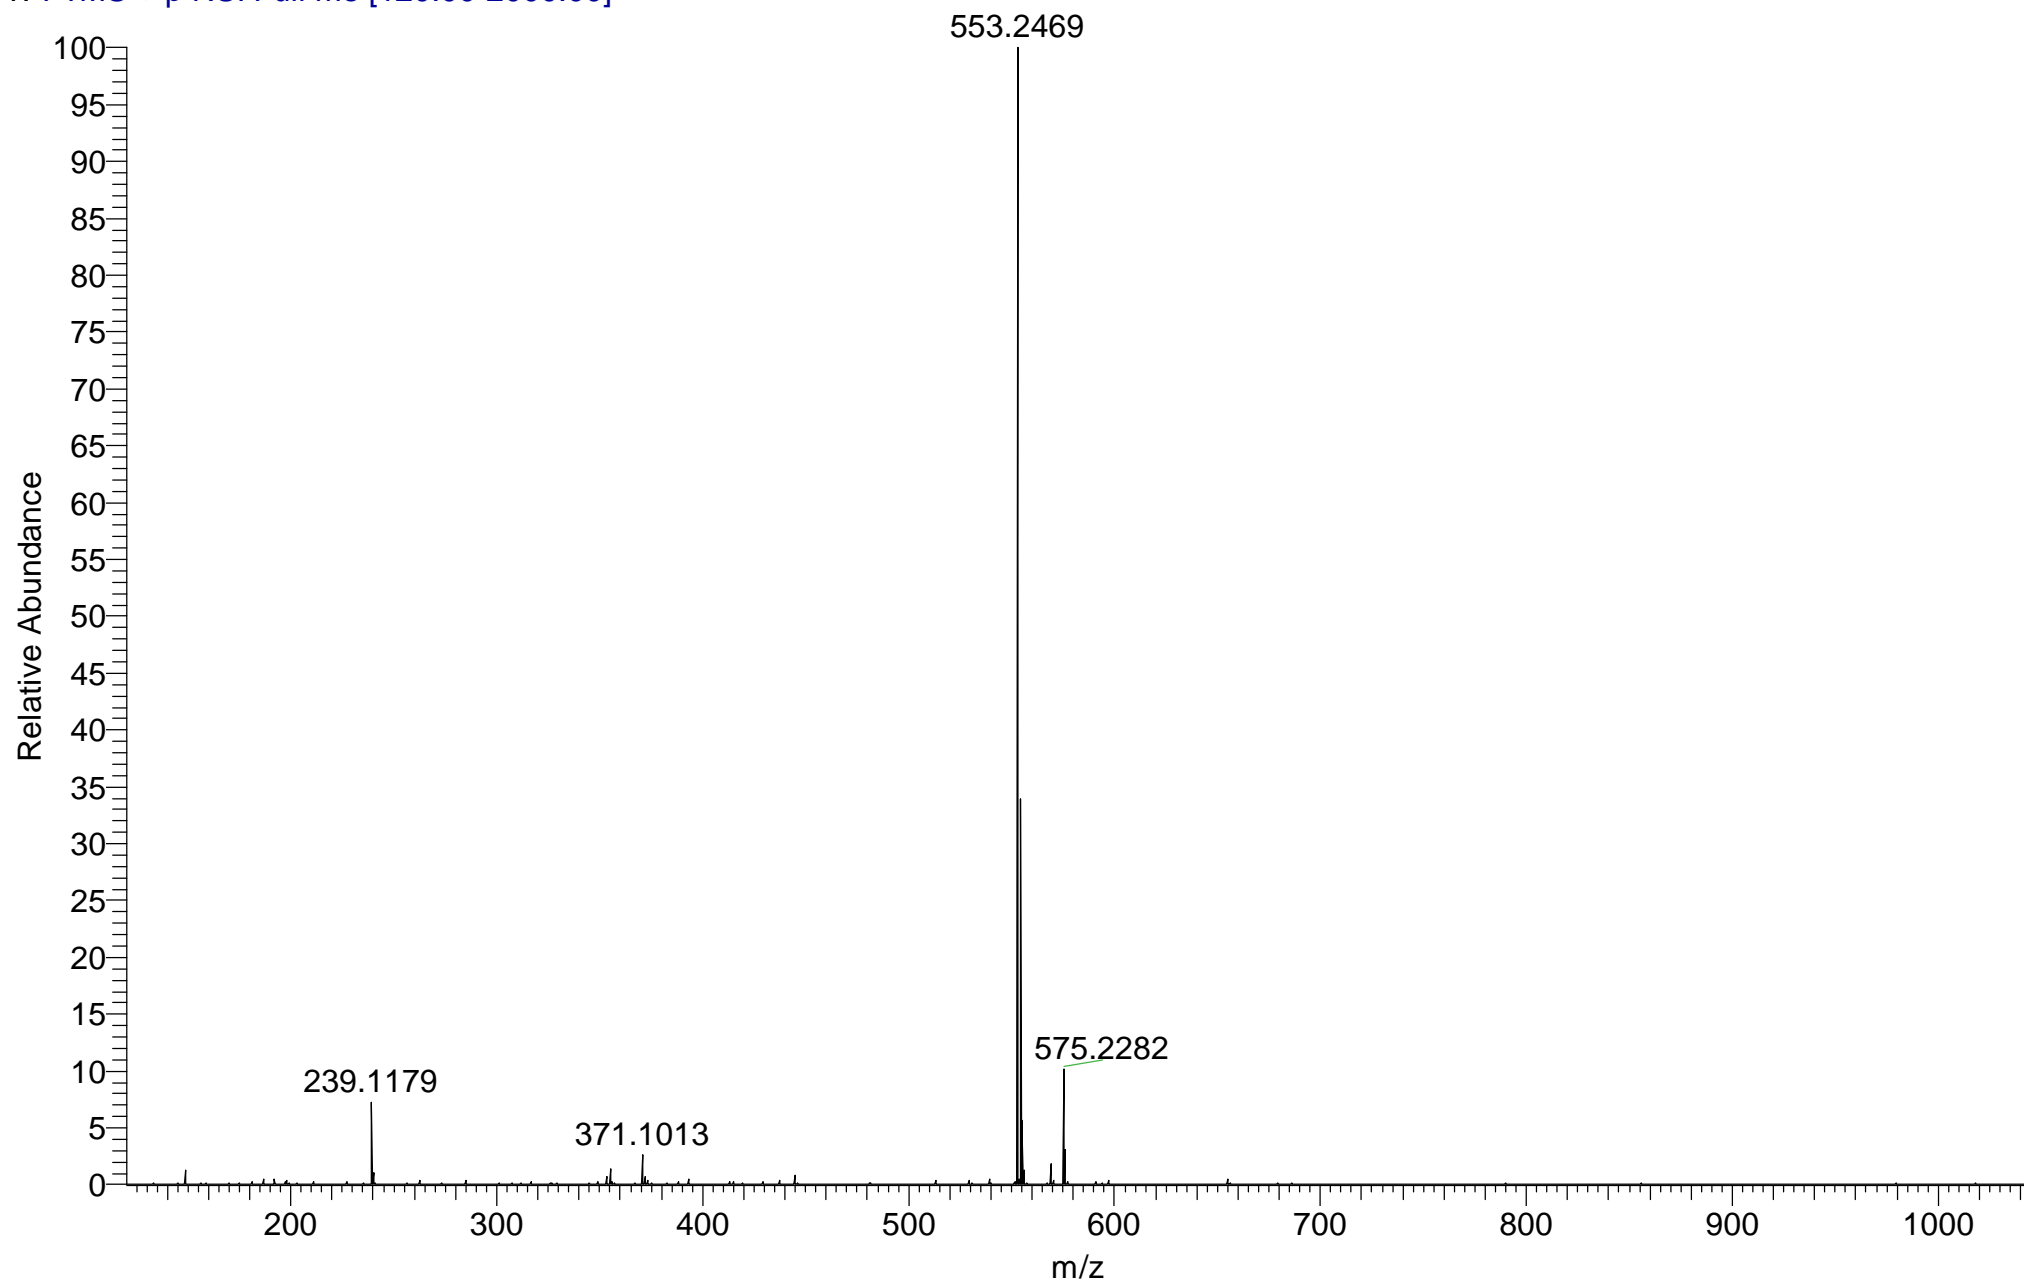

BRASHE246-OJ-HNESP #37-50 RT: 0.95-1.29 AV: 13 SM: 7G NL: 2.62E7

T: FTMS + p NSI Full ms [120.00-2000.00]

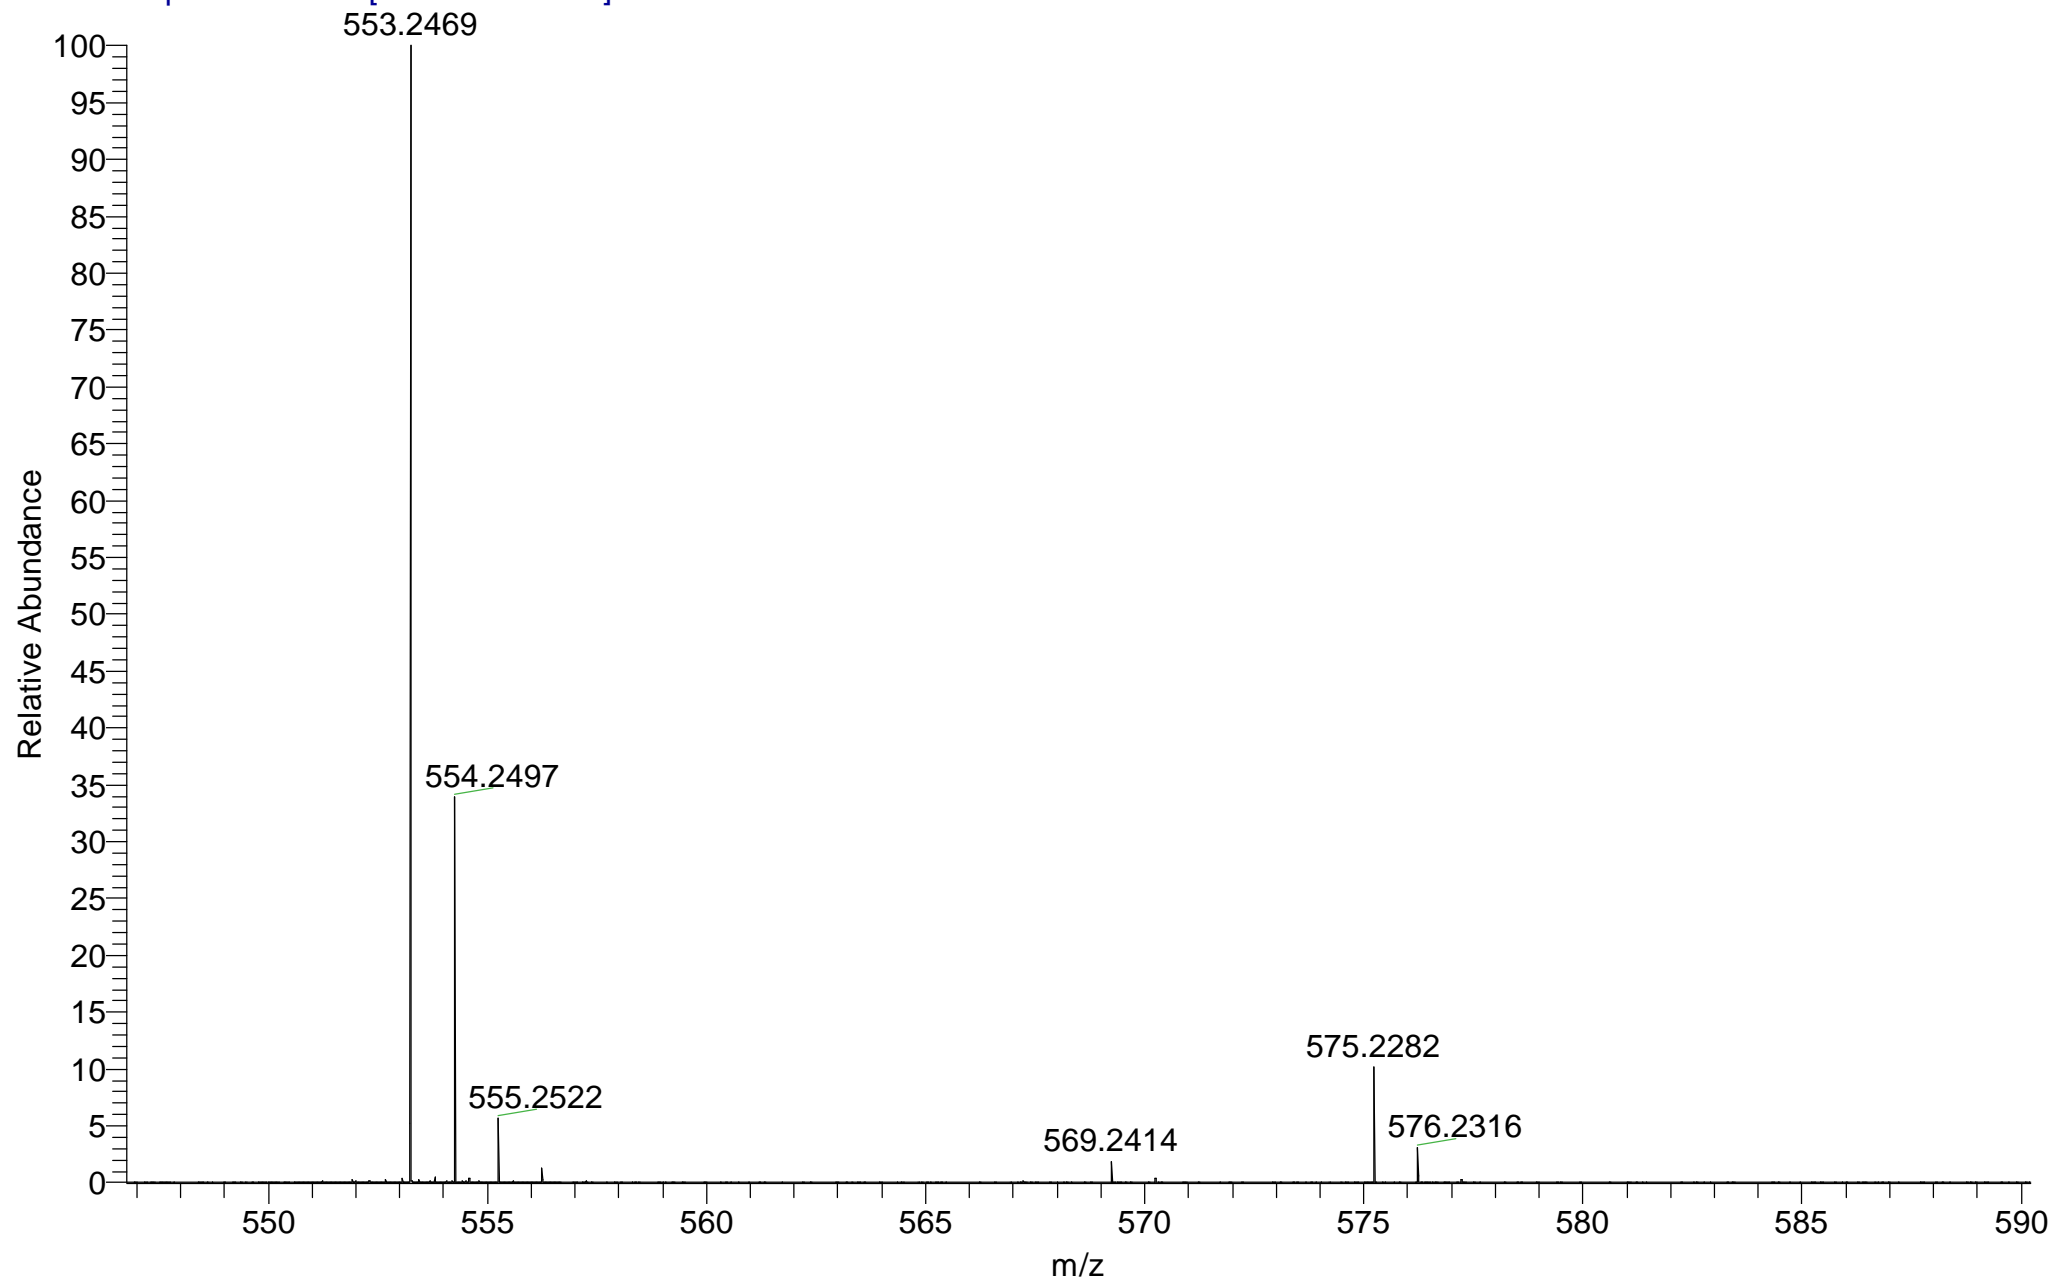

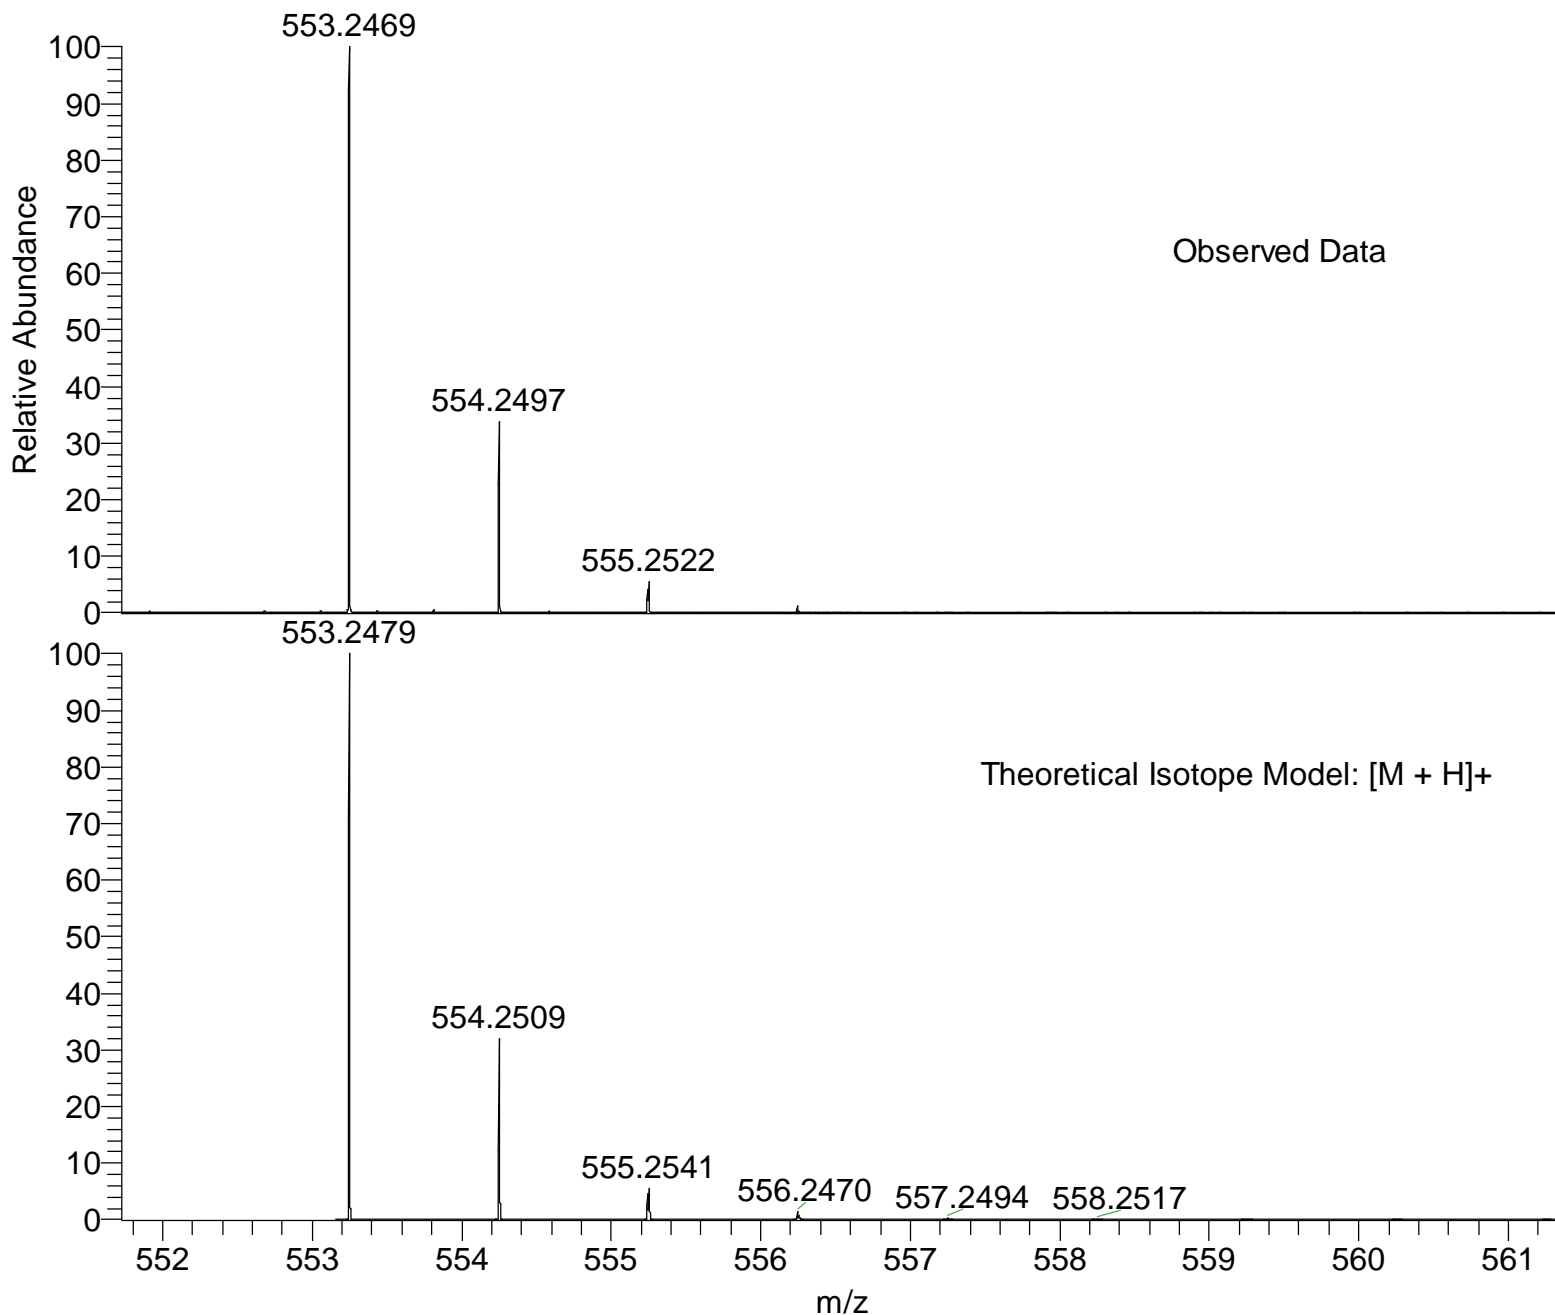

NL:  
2.62E7  
BRASHE246-OJ-HNESP#37-  
50 RT: 0.95-1.29 AV: 13 T:  
FTMS + p NSI Full ms  
[120.00-2000.00]

NL:  
1.58E4  
C<sub>29</sub> H<sub>36</sub> N<sub>4</sub> O<sub>5</sub> SH:  
C<sub>29</sub> H<sub>37</sub> N<sub>4</sub> O<sub>5</sub> S<sub>1</sub>  
p (gss, s /p:40) Chrg 1  
R: 100000 Res .Pwr . @FWHM

Isotope:           Min. .. Max.  
 14 N               0....14  
 16 O               0....15  
 12 C               0....60  
 1 H                0....80  
 23 Na              0....0  
 32 S               0....5

Tolerance Window:           +- 5.00 ppm  
 Db/Ring Equiv: -3.. 100       N-Rule: Do not use  
 Fits:                200        Charge: 1

| Mass     | Theoretical<br>Mass | Delta<br>[ppm] | RDB  | Composition                                                                    |
|----------|---------------------|----------------|------|--------------------------------------------------------------------------------|
| 553.2469 | 553.2468            | 0.2            | -1.5 | C <sub>21</sub> H <sub>49</sub> O <sub>6</sub> N <sub>2</sub> S <sub>4</sub>   |
|          | 553.2468            | 0.2            | 4.0  | C <sub>20</sub> H <sub>43</sub> O <sub>1</sub> N <sub>9</sub> S <sub>4</sub>   |
|          | 553.2468            | 0.3            | 17.0 | C <sub>35</sub> H <sub>39</sub> O <sub>1</sub> N <sub>1</sub> S <sub>2</sub>   |
|          | 553.2471            | -0.3           | 1.5  | C <sub>13</sub> H <sub>37</sub> O <sub>10</sub> N <sub>12</sub> S <sub>1</sub> |
|          | 553.2466            | 0.6            | 8.5  | C <sub>28</sub> H <sub>41</sub> O <sub>9</sub> S <sub>1</sub>                  |
|          | 553.2466            | 0.6            | 14.0 | C <sub>27</sub> H <sub>35</sub> O <sub>4</sub> N <sub>7</sub> S <sub>1</sub>   |
|          | 553.2472            | -0.6           | 23.0 | C <sub>35</sub> H <sub>31</sub> O <sub>2</sub> N <sub>5</sub>                  |
|          | 553.2473            | -0.7           | 10.0 | C <sub>20</sub> H <sub>35</sub> O <sub>2</sub> N <sub>13</sub> S <sub>2</sub>  |
|          | 553.2473            | -0.7           | 4.5  | C <sub>21</sub> H <sub>41</sub> O <sub>7</sub> N <sub>6</sub> S <sub>2</sub>   |
|          | 553.2464            | 0.9            | 5.5  | C <sub>20</sub> H <sub>37</sub> O <sub>12</sub> N <sub>6</sub>                 |
|          | 553.2464            | 0.9            | 11.0 | C <sub>19</sub> H <sub>31</sub> O <sub>7</sub> N <sub>13</sub>                 |
|          | 553.2474            | -1.0           | 7.5  | C <sub>29</sub> H <sub>45</sub> O <sub>4</sub> S <sub>3</sub>                  |
|          | 553.2461            | 1.4            | 8.0  | C <sub>27</sub> H <sub>43</sub> O <sub>3</sub> N <sub>3</sub> S <sub>3</sub>   |
|          | 553.2477            | -1.5           | 10.5 | C <sub>21</sub> H <sub>33</sub> O <sub>8</sub> N <sub>10</sub>                 |
|          | 553.2477            | -1.5           | 5.0  | C <sub>22</sub> H <sub>39</sub> O <sub>13</sub> N <sub>3</sub>                 |
|          | 553.2459            | 1.8            | -0.5 | C <sub>20</sub> H <sub>45</sub> O <sub>11</sub> N <sub>2</sub> S <sub>2</sub>  |
|          | 553.2459            | 1.8            | 5.0  | C <sub>19</sub> H <sub>39</sub> O <sub>6</sub> N <sub>9</sub> S <sub>2</sub>   |
|          | 553.2459            | 1.8            | 18.0 | C <sub>34</sub> H <sub>35</sub> O <sub>6</sub> N <sub>1</sub>                  |
|          | 553.2479            | -1.8           | 19.0 | C <sub>28</sub> H <sub>31</sub> N <sub>11</sub> S <sub>1</sub>                 |
|          | 553.2459            | 1.8            | 23.5 | C <sub>33</sub> H <sub>29</sub> O <sub>1</sub> N <sub>8</sub>                  |
|          | 553.2479            | -1.8           | 13.5 | C <sub>29</sub> H <sub>37</sub> O <sub>5</sub> N <sub>4</sub> S <sub>1</sub>   |
|          | 553.2480            | -1.9           | 0.5  | C <sub>14</sub> H <sub>41</sub> O <sub>5</sub> N <sub>12</sub> S <sub>3</sub>  |
|          | 553.2481            | -2.2           | 3.5  | C <sub>22</sub> H <sub>45</sub> O <sub>2</sub> N <sub>6</sub> S <sub>4</sub>   |
|          | 553.2455            | 2.6            | -1.0 | C <sub>19</sub> H <sub>47</sub> O <sub>5</sub> N <sub>5</sub> S <sub>4</sub>   |
|          | 553.2454            | 2.6            | 4.5  | C <sub>18</sub> H <sub>41</sub> N <sub>12</sub> S <sub>4</sub>                 |
|          | 553.2454            | 2.7            | 17.5 | C <sub>33</sub> H <sub>37</sub> N <sub>4</sub> S <sub>2</sub>                  |
|          | 553.2484            | -2.8           | 1.0  | C <sub>15</sub> H <sub>39</sub> O <sub>11</sub> N <sub>9</sub> S <sub>1</sub>  |
|          | 553.2452            | 3.0            | 9.0  | C <sub>26</sub> H <sub>39</sub> O <sub>8</sub> N <sub>3</sub> S <sub>1</sub>   |
|          | 553.2452            | 3.0            | 14.5 | C <sub>25</sub> H <sub>33</sub> O <sub>3</sub> N <sub>10</sub> S <sub>1</sub>  |
|          | 553.2486            | -3.0           | 22.5 | C <sub>37</sub> H <sub>33</sub> O <sub>3</sub> N <sub>2</sub>                  |
|          | 553.2486            | -3.1           | 9.5  | C <sub>22</sub> H <sub>37</sub> O <sub>3</sub> N <sub>10</sub> S <sub>2</sub>  |

| Mass     | Theoretical<br>Mass | Delta<br>[ppm] | RDB  | Composition                                                                    |
|----------|---------------------|----------------|------|--------------------------------------------------------------------------------|
| 553.2486 | 553.2486            | -3.1           | 4.0  | C <sub>23</sub> H <sub>43</sub> O <sub>8</sub> N <sub>3</sub> S <sub>2</sub>   |
| 553.2451 | 553.2451            | 3.3            | 6.0  | C <sub>18</sub> H <sub>35</sub> O <sub>11</sub> N <sub>9</sub>                 |
| 553.2488 | 553.2488            | -3.4           | 12.5 | C <sub>30</sub> H <sub>41</sub> N <sub>4</sub> S <sub>3</sub>                  |
| 553.2488 | 553.2488            | -3.5           | -0.5 | C <sub>15</sub> H <sub>45</sub> N <sub>12</sub> S <sub>5</sub>                 |
| 553.2448 | 553.2448            | 3.9            | 8.5  | C <sub>25</sub> H <sub>41</sub> O <sub>2</sub> N <sub>6</sub> S <sub>3</sub>   |
| 553.2491 | 553.2491            | -3.9           | 15.5 | C <sub>22</sub> H <sub>29</sub> O <sub>4</sub> N <sub>14</sub>                 |
| 553.2491 | 553.2491            | -3.9           | 10.0 | C <sub>23</sub> H <sub>35</sub> O <sub>9</sub> N <sub>7</sub>                  |
| 553.2491 | 553.2491            | -3.9           | 4.5  | C <sub>24</sub> H <sub>41</sub> O <sub>14</sub>                                |
| 553.2446 | 553.2446            | 4.2            | 0.0  | C <sub>18</sub> H <sub>43</sub> O <sub>10</sub> N <sub>5</sub> S <sub>2</sub>  |
| 553.2446 | 553.2446            | 4.2            | 5.5  | C <sub>17</sub> H <sub>37</sub> O <sub>5</sub> N <sub>12</sub> S <sub>2</sub>  |
| 553.2445 | 553.2445            | 4.3            | 18.5 | C <sub>32</sub> H <sub>33</sub> O <sub>5</sub> N <sub>4</sub>                  |
| 553.2493 | 553.2493            | -4.3           | 18.5 | C <sub>30</sub> H <sub>33</sub> O <sub>1</sub> N <sub>8</sub> S <sub>1</sub>   |
| 553.2445 | 553.2445            | 4.3            | 24.0 | C <sub>31</sub> H <sub>27</sub> N <sub>11</sub>                                |
| 553.2493 | 553.2493            | -4.3           | 13.0 | C <sub>31</sub> H <sub>39</sub> O <sub>6</sub> N <sub>1</sub> S <sub>1</sub>   |
| 553.2493 | 553.2493            | -4.3           | 0.0  | C <sub>16</sub> H <sub>43</sub> O <sub>6</sub> N <sub>9</sub> S <sub>3</sub>   |
| 553.2444 | 553.2444            | 4.5            | -3.0 | C <sub>10</sub> H <sub>39</sub> O <sub>13</sub> N <sub>11</sub> S <sub>1</sub> |
| 553.2495 | 553.2495            | -4.7           | 3.0  | C <sub>24</sub> H <sub>47</sub> O <sub>3</sub> N <sub>3</sub> S <sub>4</sub>   |
| 553.2443 | 553.2443            | 4.7            | 2.5  | C <sub>25</sub> H <sub>49</sub> O <sub>1</sub> N <sub>2</sub> S <sub>5</sub>   |
| 553.2496 | 553.2496            | -4.9           | -2.5 | C <sub>9</sub> H <sub>37</sub> O <sub>15</sub> N <sub>12</sub>                 |

# Compound 21

AET9-3 MW=500?  
ASAP(SOLID)

EPSRC National Centre Swansea  
LTQ Orbitrap XL

Thrup  
06/11/2012 12:24:50

BRASHE235-PG-HASP #33-40 RT: 0.92-1.12 AV: 8 SM: 7G NL: 5.61E6  
T: FTMS + p APCI corona Full ms [100.00-800.00]

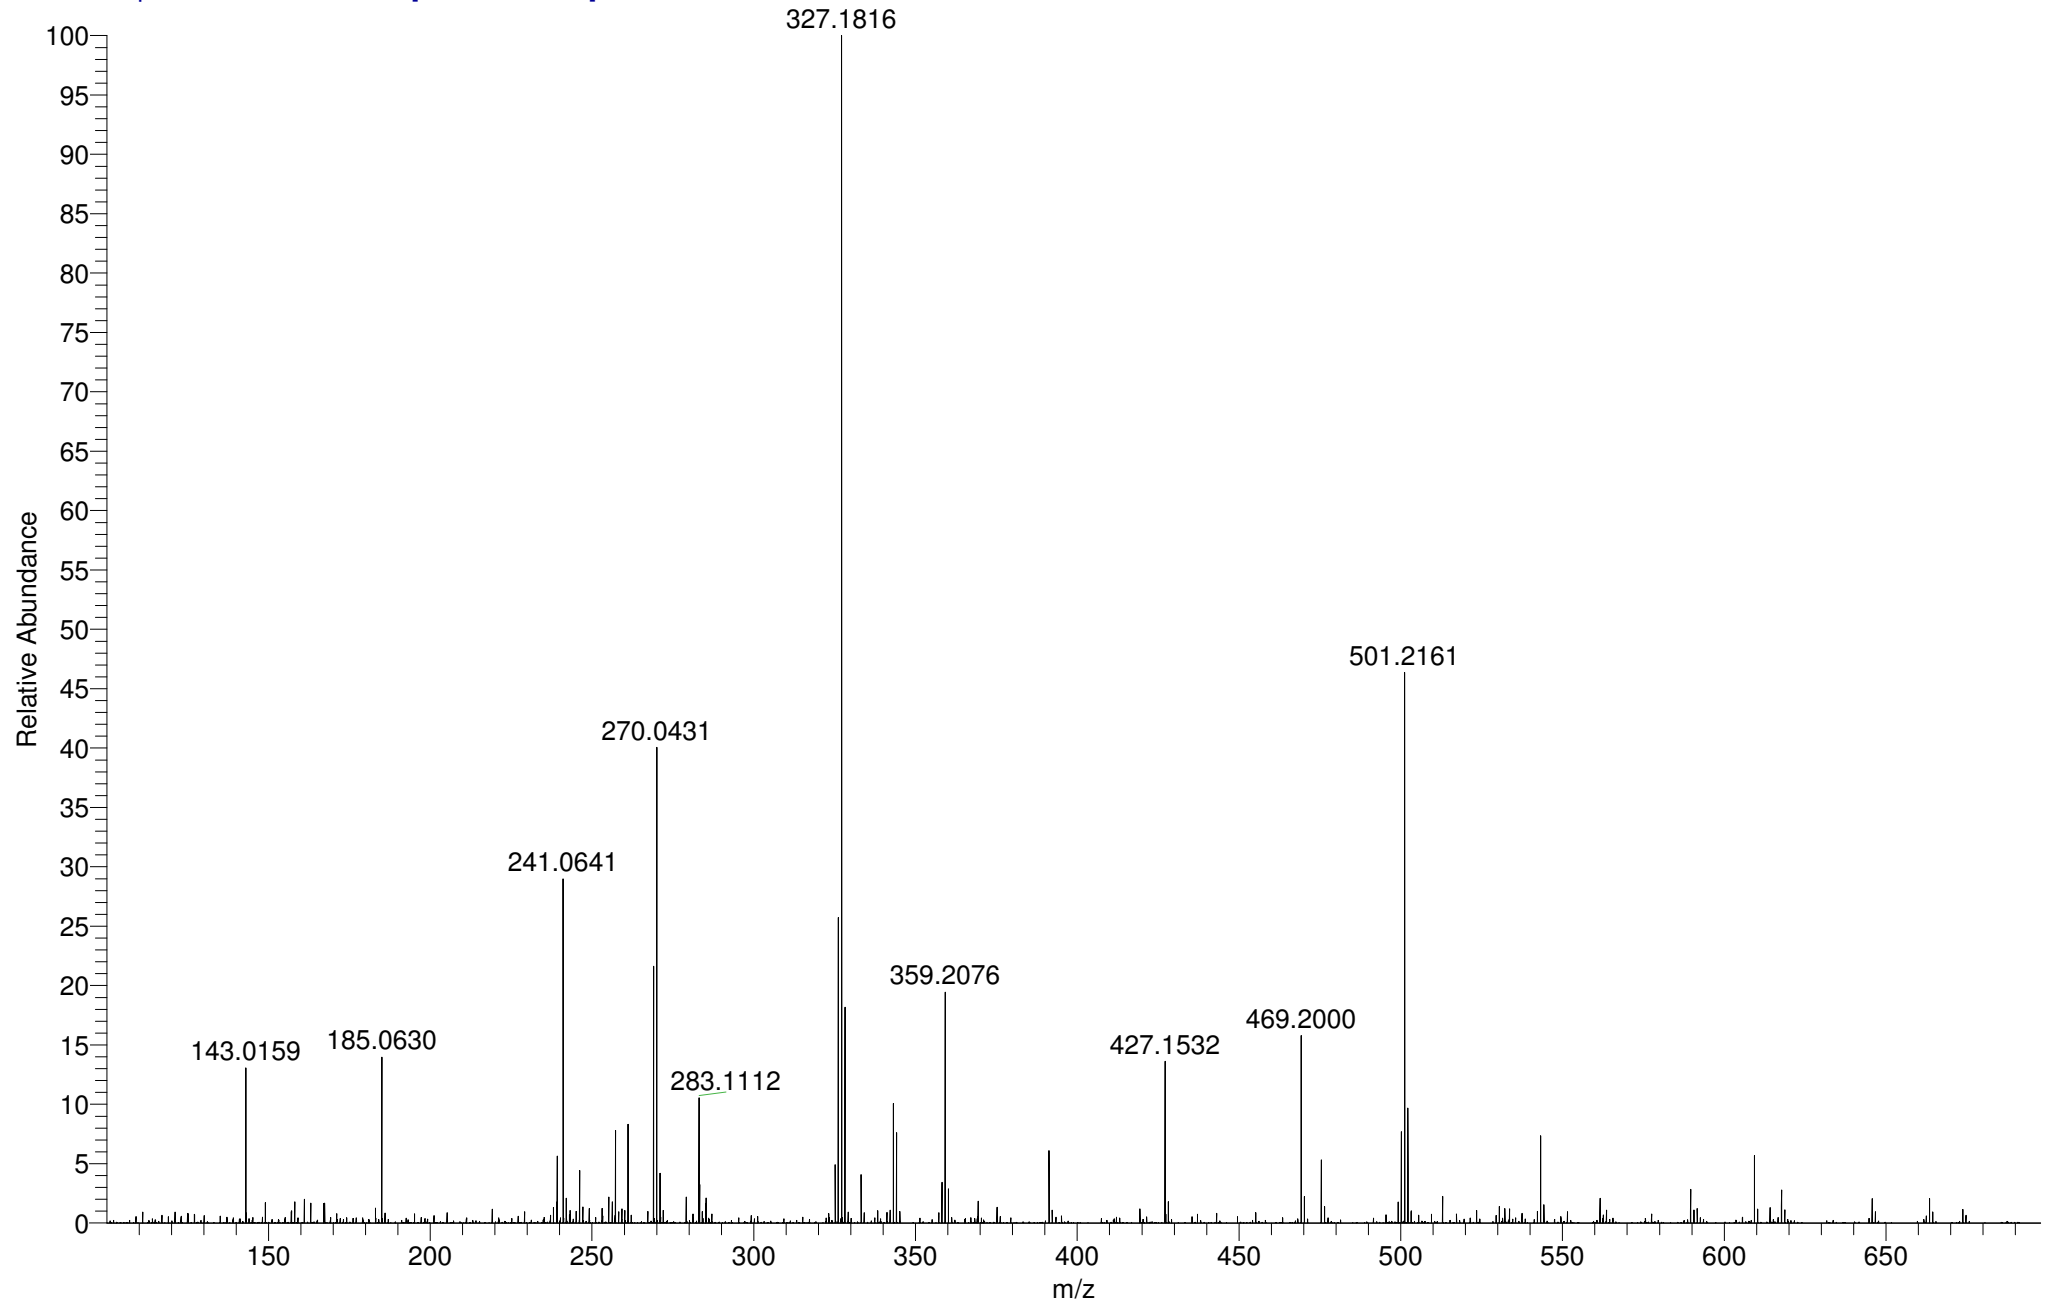

BRASHE235-PG-HASP #33-40 RT: 0.92-1.12 AV: 8 SM: 7G NL: 5.61E6  
T: FTMS + p APCI corona Full ms [100.00-800.00]

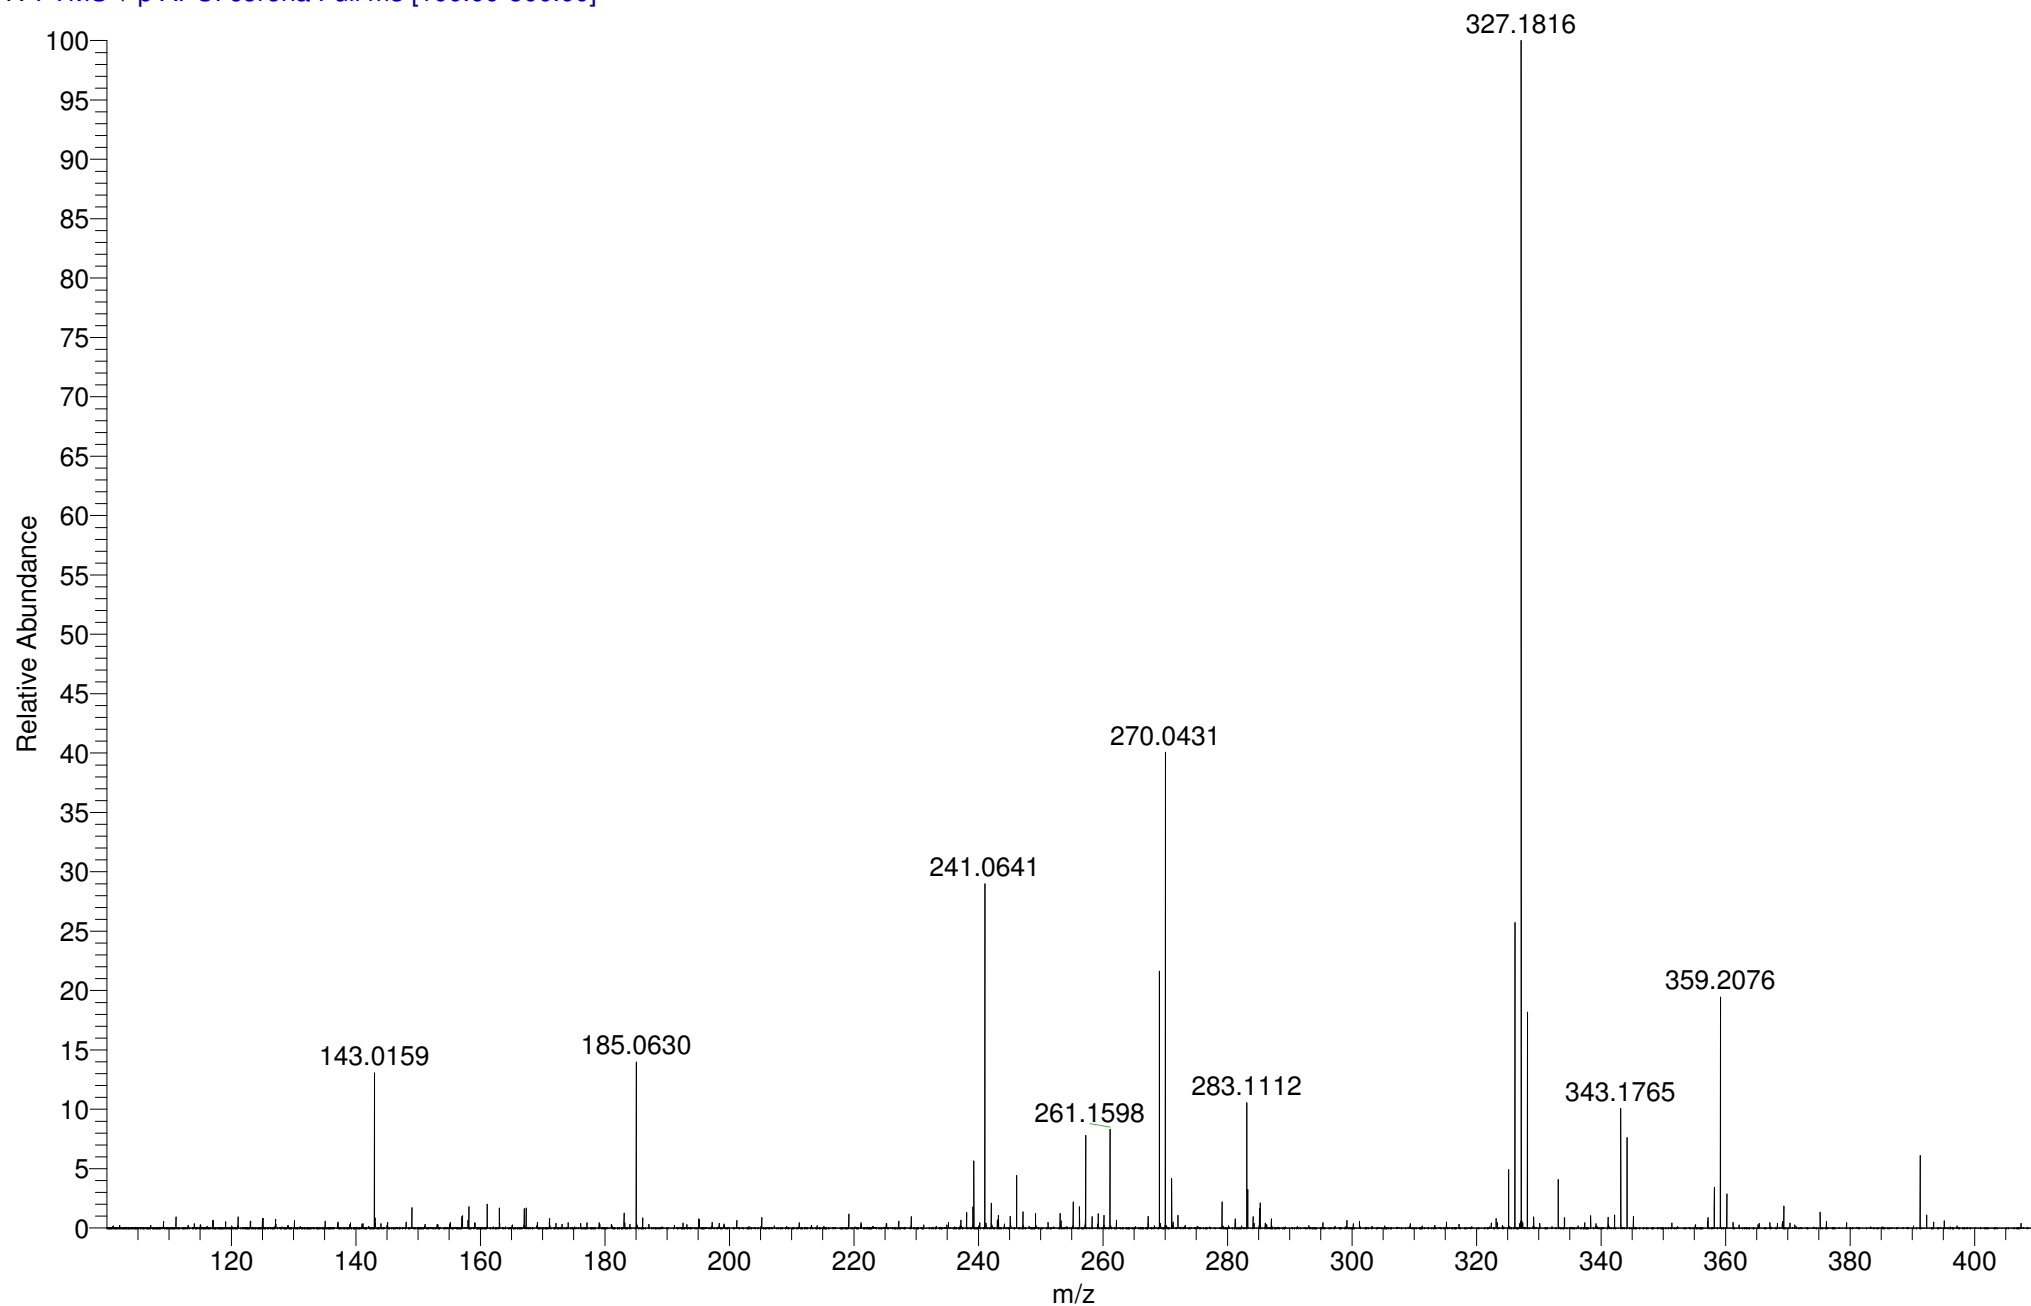



BRASHE235-PG-HASP #33-40 RT: 0.92-1.12 AV: 8 SM: 7G NL: 2.60E6  
T: FTMS + p APCI corona Full ms [100.00-800.00]

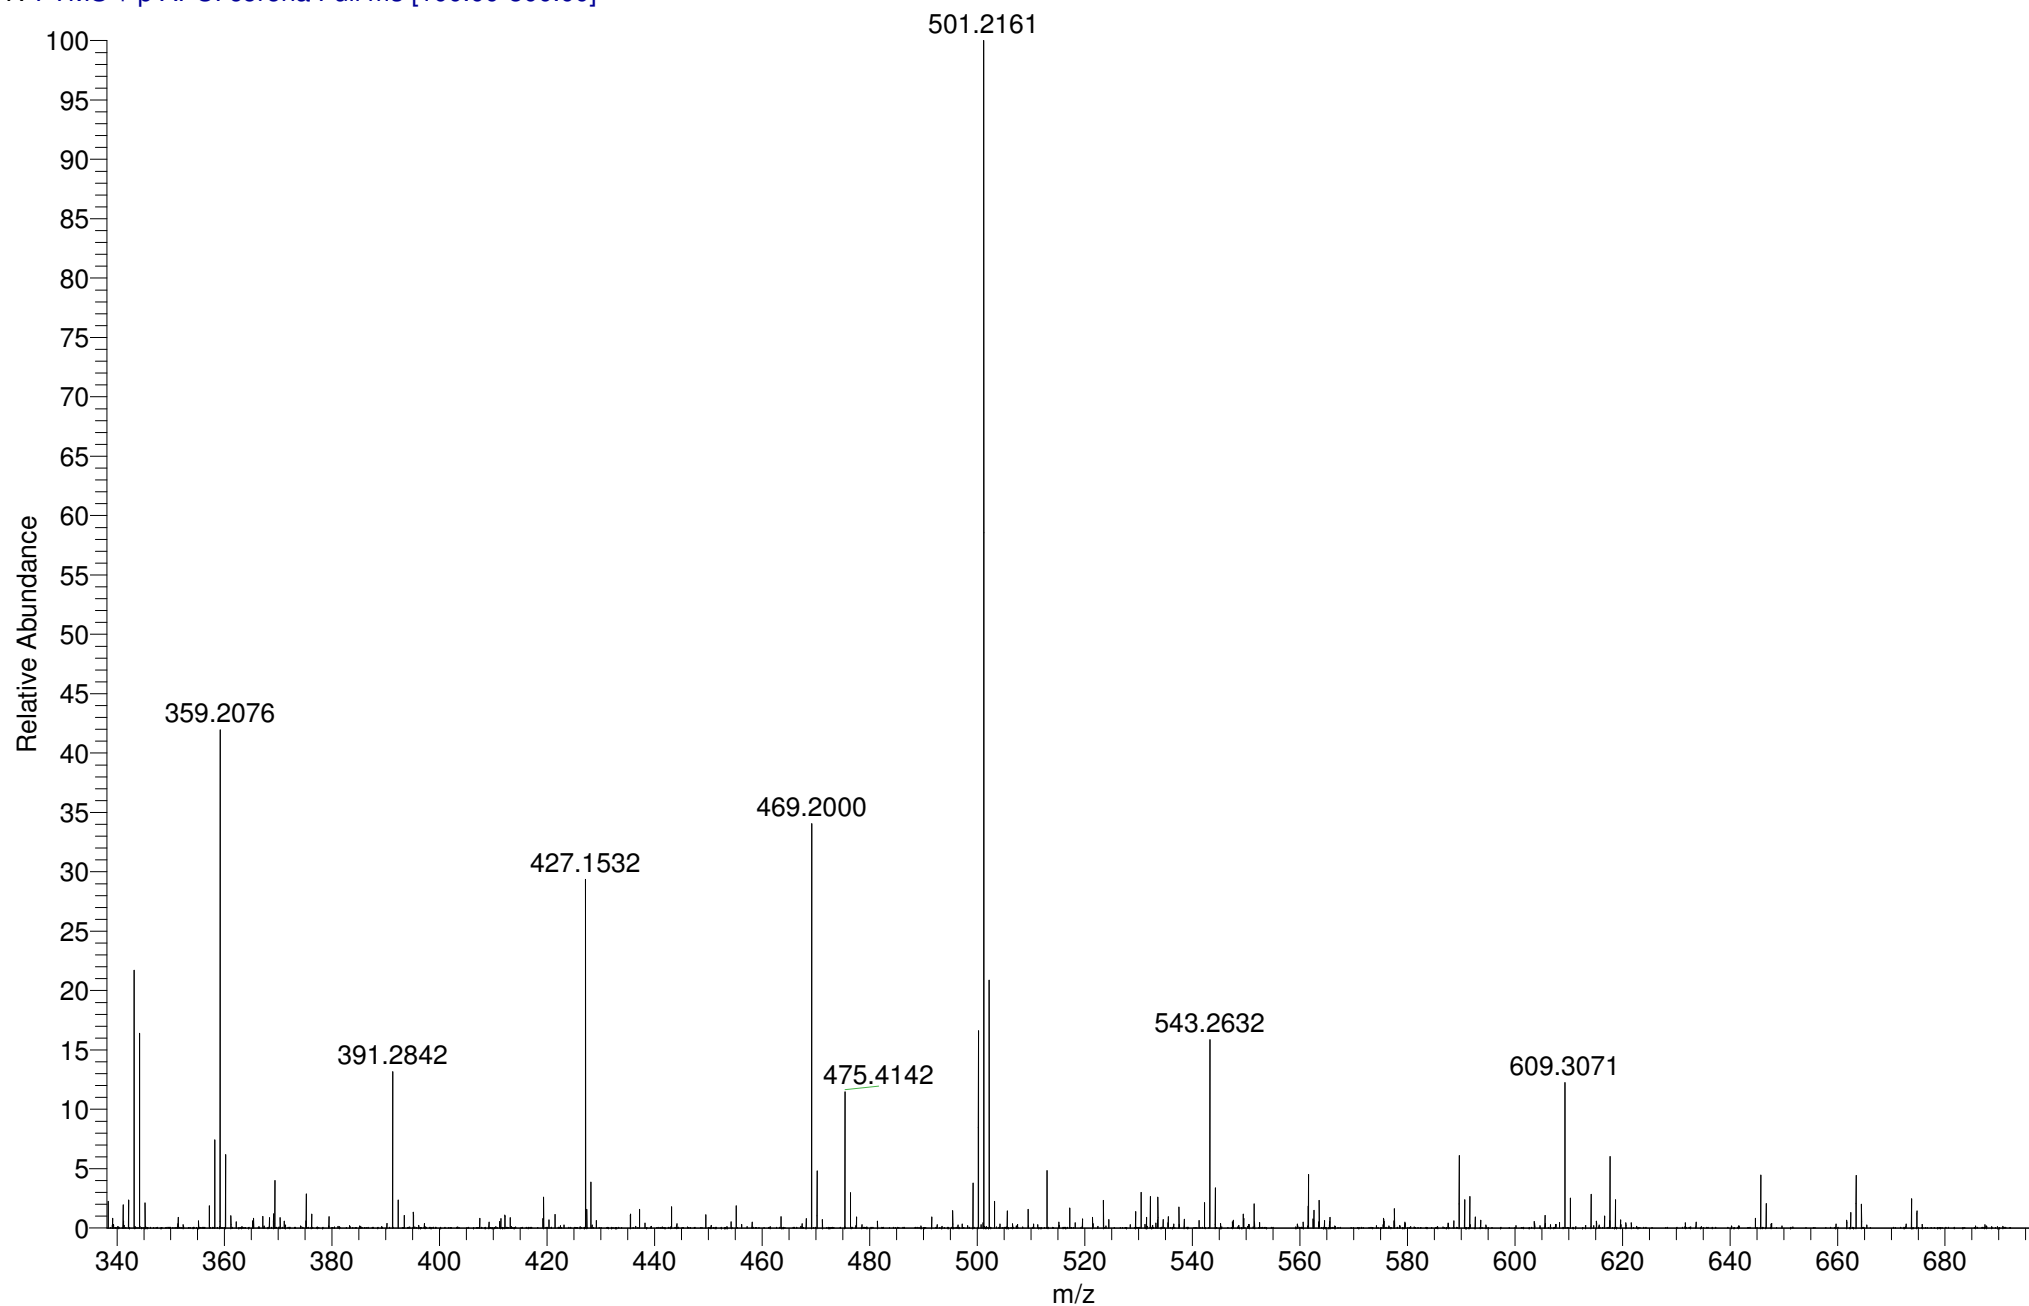

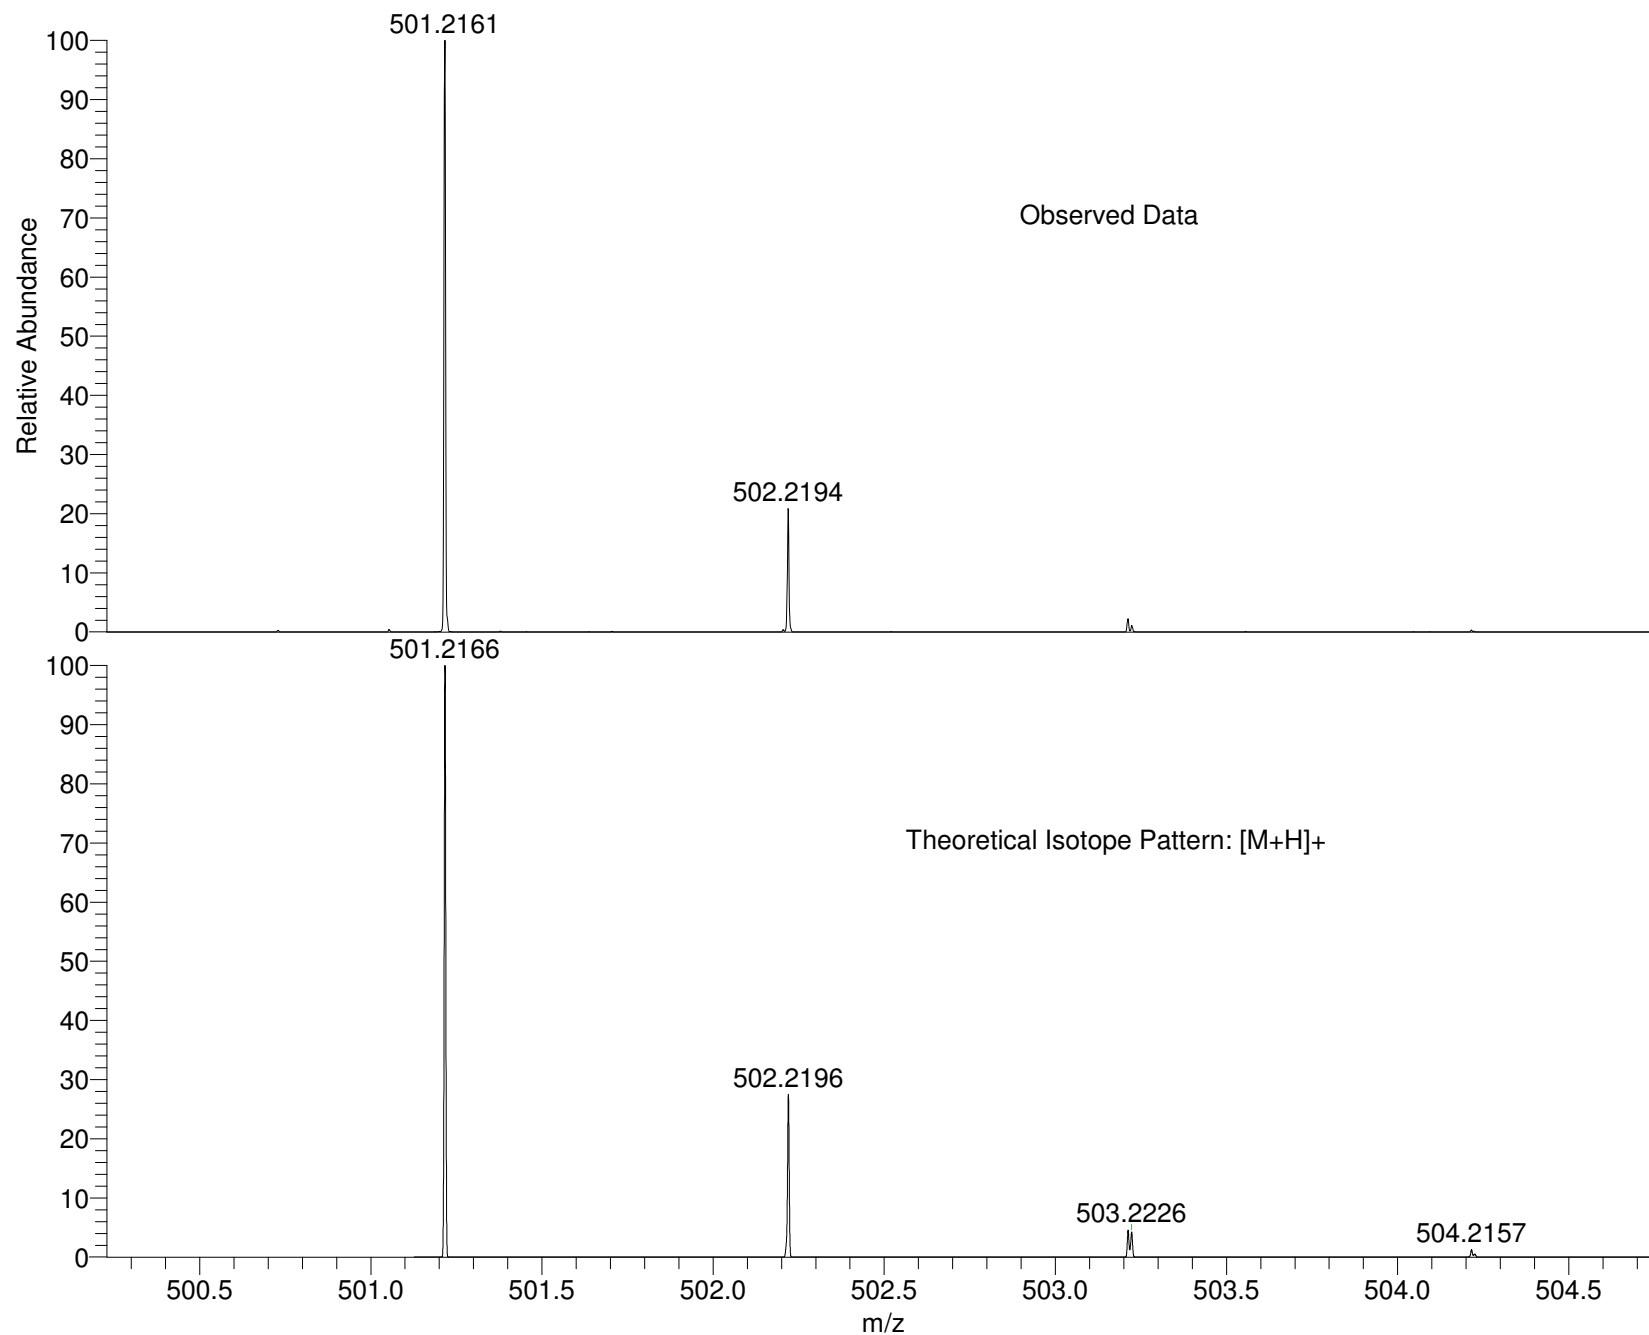

NL:  
2.60E6  
BRASHE235-PG-HASP#33-40  
RT: 0.92-1.12 AV: 8 T: FTMS  
+ p APCI corona Full ms  
[100.00-800.00]

NL:  
1.65E4  
C<sub>25</sub>H<sub>32</sub>N<sub>4</sub>O<sub>5</sub>SH:  
C<sub>25</sub>H<sub>33</sub>N<sub>4</sub>O<sub>5</sub>S<sub>1</sub>  
p (gss, s /p:40) Chrg 1  
R: 100000 Res .Pwr . @FWHM

Isotope:                   Min. .. Max.  
 14 N                       0....16  
 16 O                       0....15  
 12 C                       0....80  
 1 H                        0....100  
 23 Na                      0....0  
 32 S                       0....3  
 Tolerance Window:       +- 5.00 ppm  
 Db/Ring Equiv:           -3.. 100  
 Fits:                      100

N-Rule: Do not use  
 Charge: 1

| Mass     | Theoretical Mass | Delta [ppm] | RDB  | Composition                                                                   |
|----------|------------------|-------------|------|-------------------------------------------------------------------------------|
| 501.2161 | 501.2161         | -0.1        | 5.5  | C <sub>25</sub> H <sub>41</sub> O <sub>4</sub> S <sub>3</sub>                 |
|          | 501.2160         | 0.3         | 2.5  | C <sub>17</sub> H <sub>37</sub> O <sub>7</sub> N <sub>6</sub> S <sub>2</sub>  |
|          | 501.2160         | 0.3         | 8.0  | C <sub>16</sub> H <sub>31</sub> O <sub>2</sub> N <sub>13</sub> S <sub>2</sub> |
|          | 501.2159         | 0.3         | 21.0 | C <sub>31</sub> H <sub>27</sub> O <sub>2</sub> N <sub>5</sub> S <sub>1</sub>  |
|          | 501.2158         | 0.6         | -0.5 | C <sub>9</sub> H <sub>33</sub> O <sub>10</sub> N <sub>12</sub> S <sub>1</sub> |
|          | 501.2164         | -0.7        | 8.5  | C <sub>17</sub> H <sub>29</sub> O <sub>8</sub> N <sub>10</sub>                |
|          | 501.2164         | -0.7        | 3.0  | C <sub>18</sub> H <sub>35</sub> O <sub>13</sub> N <sub>3</sub>                |
|          | 501.2166         | -1.0        | 17.0 | C <sub>24</sub> H <sub>27</sub> N <sub>11</sub> S <sub>1</sub>                |
|          | 501.2166         | -1.0        | 11.5 | C <sub>25</sub> H <sub>33</sub> O <sub>5</sub> N <sub>4</sub> S <sub>1</sub>  |
|          | 501.2167         | -1.1        | -1.5 | C <sub>10</sub> H <sub>37</sub> O <sub>5</sub> N <sub>12</sub> S <sub>3</sub> |
|          | 501.2155         | 1.3         | 15.0 | C <sub>31</sub> H <sub>35</sub> O <sub>1</sub> N <sub>1</sub> S <sub>2</sub>  |
|          | 501.2153         | 1.6         | -1.0 | C <sub>8</sub> H <sub>35</sub> O <sub>4</sub> N <sub>15</sub> S <sub>3</sub>  |
|          | 501.2153         | 1.6         | 6.5  | C <sub>24</sub> H <sub>37</sub> O <sub>9</sub> S <sub>1</sub>                 |
|          | 501.2153         | 1.6         | 12.0 | C <sub>23</sub> H <sub>31</sub> O <sub>4</sub> N <sub>7</sub> S <sub>1</sub>  |
|          | 501.2151         | 2.0         | 3.5  | C <sub>16</sub> H <sub>33</sub> O <sub>12</sub> N <sub>6</sub>                |
|          | 501.2151         | 2.0         | 9.0  | C <sub>15</sub> H <sub>27</sub> O <sub>7</sub> N <sub>13</sub>                |
|          | 501.2171         | -2.0        | 4.5  | C <sub>10</sub> H <sub>29</sub> O <sub>6</sub> N <sub>16</sub> S <sub>1</sub> |
|          | 501.2171         | -2.0        | -1.0 | C <sub>11</sub> H <sub>35</sub> O <sub>11</sub> N <sub>9</sub> S <sub>1</sub> |
|          | 501.2173         | -2.3        | 20.5 | C <sub>33</sub> H <sub>29</sub> O <sub>3</sub> N <sub>2</sub>                 |
|          | 501.2173         | -2.4        | 7.5  | C <sub>18</sub> H <sub>33</sub> O <sub>3</sub> N <sub>10</sub> S <sub>2</sub> |
|          | 501.2173         | -2.4        | 2.0  | C <sub>19</sub> H <sub>39</sub> O <sub>8</sub> N <sub>3</sub> S <sub>2</sub>  |
|          | 501.2148         | 2.6         | 6.0  | C <sub>23</sub> H <sub>39</sub> O <sub>3</sub> N <sub>3</sub> S <sub>3</sub>  |
|          | 501.2175         | -2.8        | 10.5 | C <sub>26</sub> H <sub>37</sub> N <sub>4</sub> S <sub>3</sub>                 |
|          | 501.2146         | 2.9         | -2.5 | C <sub>16</sub> H <sub>41</sub> O <sub>11</sub> N <sub>2</sub> S <sub>2</sub> |
|          | 501.2146         | 2.9         | 3.0  | C <sub>15</sub> H <sub>35</sub> O <sub>6</sub> N <sub>9</sub> S <sub>2</sub>  |
|          | 501.2146         | 3.0         | 8.5  | C <sub>14</sub> H <sub>29</sub> O <sub>1</sub> N <sub>16</sub> S <sub>2</sub> |
|          | 501.2146         | 3.0         | 16.0 | C <sub>30</sub> H <sub>31</sub> O <sub>6</sub> N <sub>1</sub>                 |
|          | 501.2146         | 3.0         | 21.5 | C <sub>29</sub> H <sub>25</sub> O <sub>1</sub> N <sub>8</sub>                 |
|          | 501.2144         | 3.3         | 0.0  | C <sub>7</sub> H <sub>31</sub> O <sub>9</sub> N <sub>15</sub> S <sub>1</sub>  |
|          | 501.2178         | -3.3        | 13.5 | C <sub>18</sub> H <sub>25</sub> O <sub>4</sub> N <sub>14</sub>                |
|          | 501.2178         | -3.3        | 8.0  | C <sub>19</sub> H <sub>31</sub> O <sub>9</sub> N <sub>7</sub>                 |

| Mass     | Theoretical<br>Mass | Delta<br>[ppm] | RDB  | Composition                                                                   |
|----------|---------------------|----------------|------|-------------------------------------------------------------------------------|
| 501.2178 | 501.2178            | -3.4           | 2.5  | C <sub>20</sub> H <sub>37</sub> O <sub>14</sub>                               |
| 501.2180 | 501.2180            | -3.7           | 16.5 | C <sub>26</sub> H <sub>29</sub> O <sub>1</sub> N <sub>8</sub> S <sub>1</sub>  |
| 501.2180 | 501.2180            | -3.7           | 11.0 | C <sub>27</sub> H <sub>35</sub> O <sub>6</sub> N <sub>1</sub> S <sub>1</sub>  |
| 501.2180 | 501.2180            | -3.8           | 3.5  | C <sub>11</sub> H <sub>33</sub> O <sub>1</sub> N <sub>16</sub> S <sub>3</sub> |
| 501.2180 | 501.2180            | -3.8           | -2.0 | C <sub>12</sub> H <sub>39</sub> O <sub>6</sub> N <sub>9</sub> S <sub>3</sub>  |
| 501.2141 | 501.2141            | 4.0            | 15.5 | C <sub>29</sub> H <sub>33</sub> N <sub>4</sub> S <sub>2</sub>                 |
| 501.2139 | 501.2139            | 4.3            | 7.0  | C <sub>22</sub> H <sub>35</sub> O <sub>8</sub> N <sub>3</sub> S <sub>1</sub>  |
| 501.2139 | 501.2139            | 4.3            | 12.5 | C <sub>21</sub> H <sub>29</sub> O <sub>3</sub> N <sub>10</sub> S <sub>1</sub> |
| 501.2138 | 501.2138            | 4.7            | 4.0  | C <sub>14</sub> H <sub>31</sub> O <sub>11</sub> N <sub>9</sub>                |
| 501.2137 | 501.2137            | 4.7            | 9.5  | C <sub>13</sub> H <sub>25</sub> O <sub>6</sub> N <sub>16</sub>                |
| 501.2185 | 501.2185            | -4.7           | 4.0  | C <sub>12</sub> H <sub>31</sub> O <sub>7</sub> N <sub>13</sub> S <sub>1</sub> |
| 501.2185 | 501.2185            | -4.7           | -1.5 | C <sub>13</sub> H <sub>37</sub> O <sub>12</sub> N <sub>6</sub> S <sub>1</sub> |

AET9-4 MW=542?  
ASAP(SOLID)

# Compound 22

EPSRC National Centre Swansea  
LTQ Orbitrap XL

Thrup  
06/11/2012 12:17:45

BRASHE234-PG-HASP #45-50 RT: 1.26-1.41 AV: 6 SM: 7G NL: 1.58E7  
T: FTMS + p APCI corona Full ms [100.00-800.00]

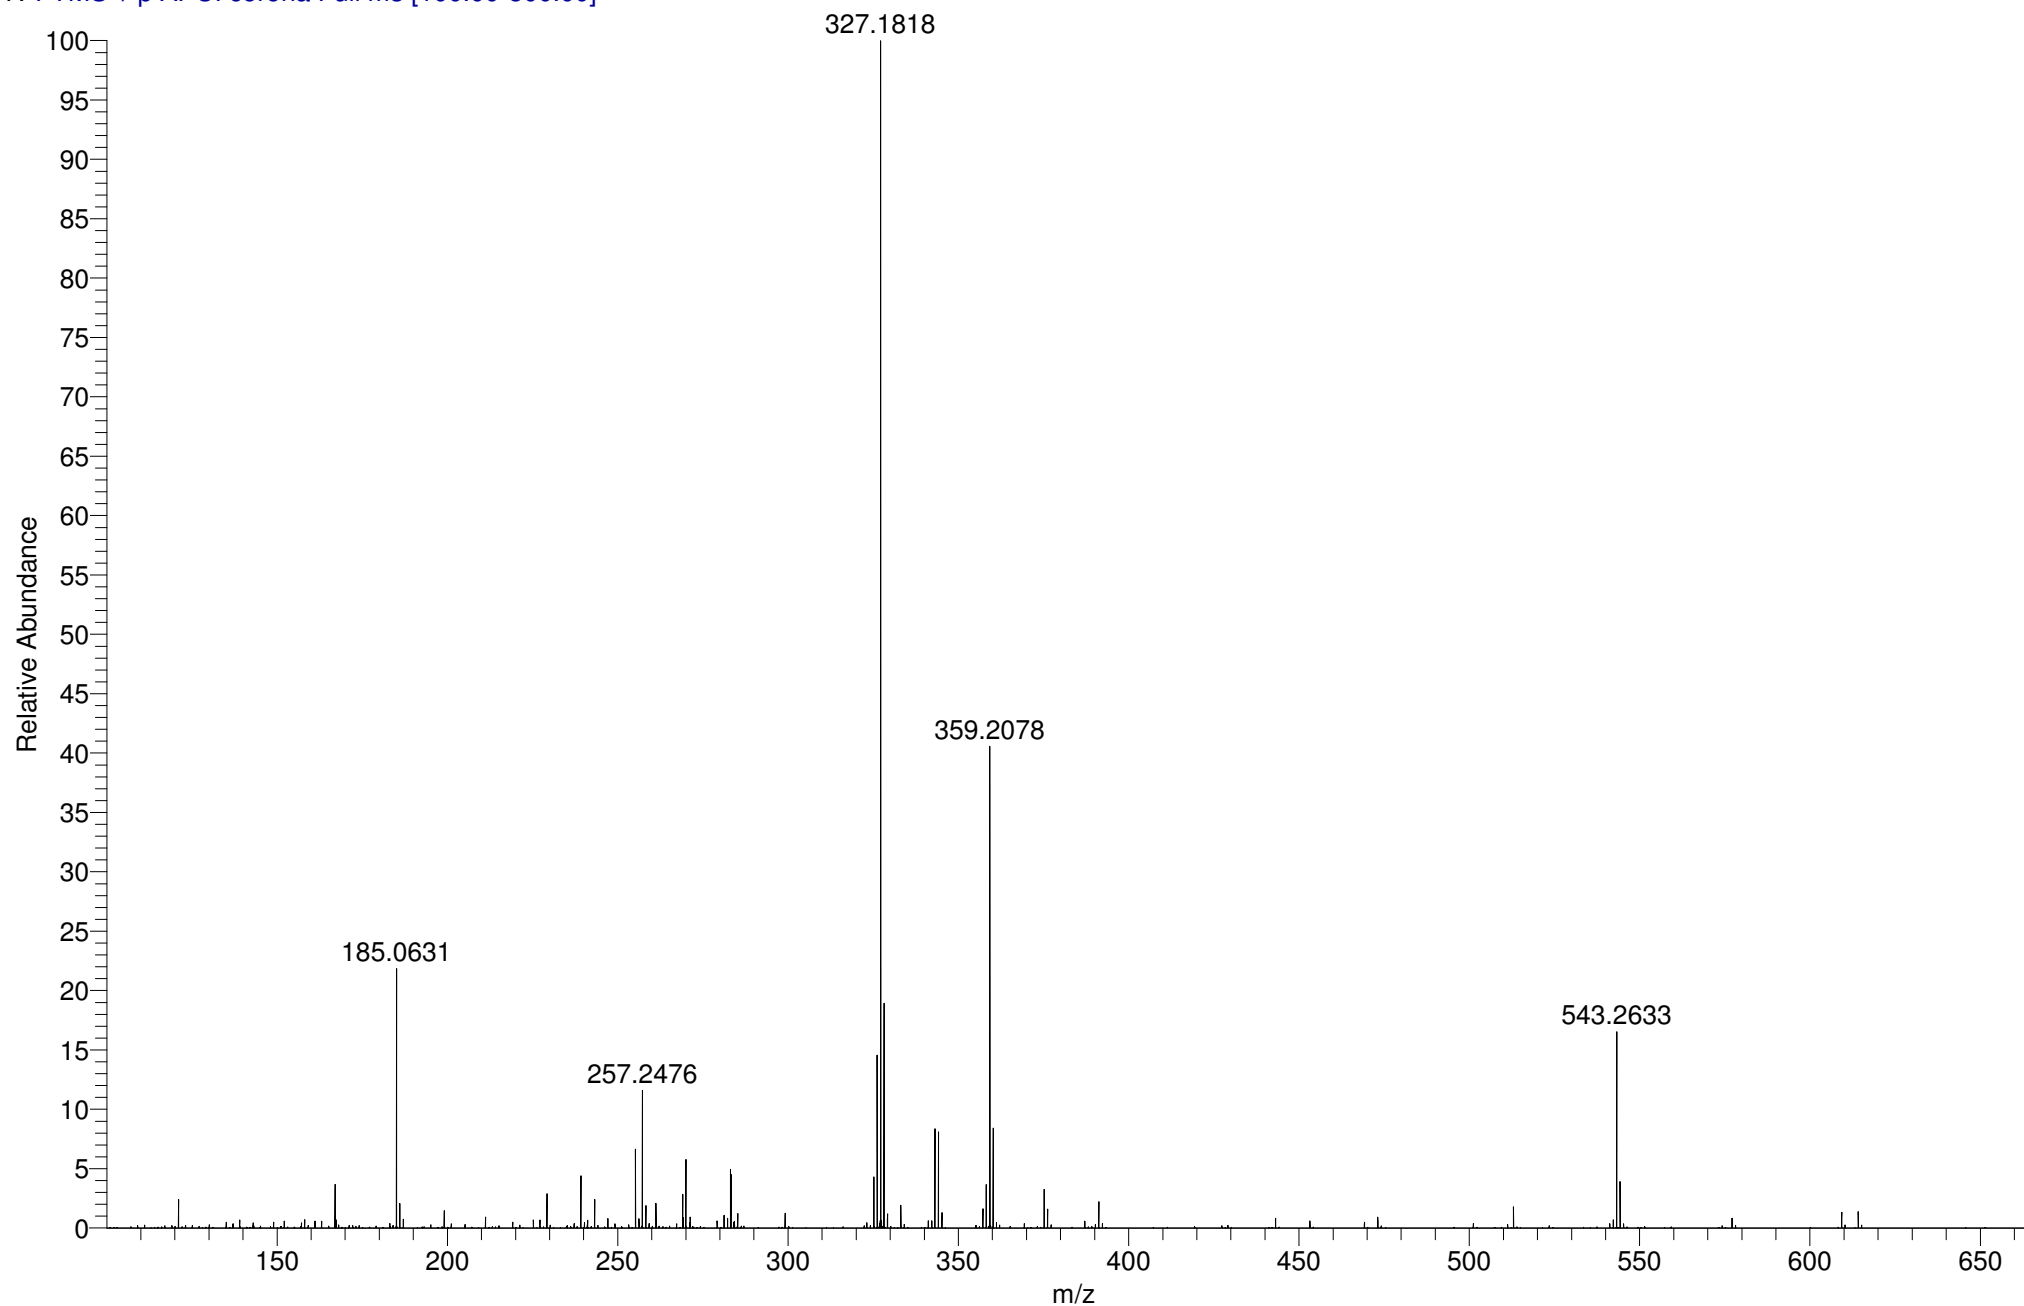

AET9-4 MW=542?  
ASAP(SOLID)

EPSRC National Centre Swansea  
LTQ Orbitrap XL

Throup  
06/11/2012 12:17:45

BRASHE234-PG-HASP #45-50 RT: 1.26-1.41 AV: 6 SM: 7G NL: 1.58E7  
T: FTMS + p APCI corona Full ms [100.00-800.00]

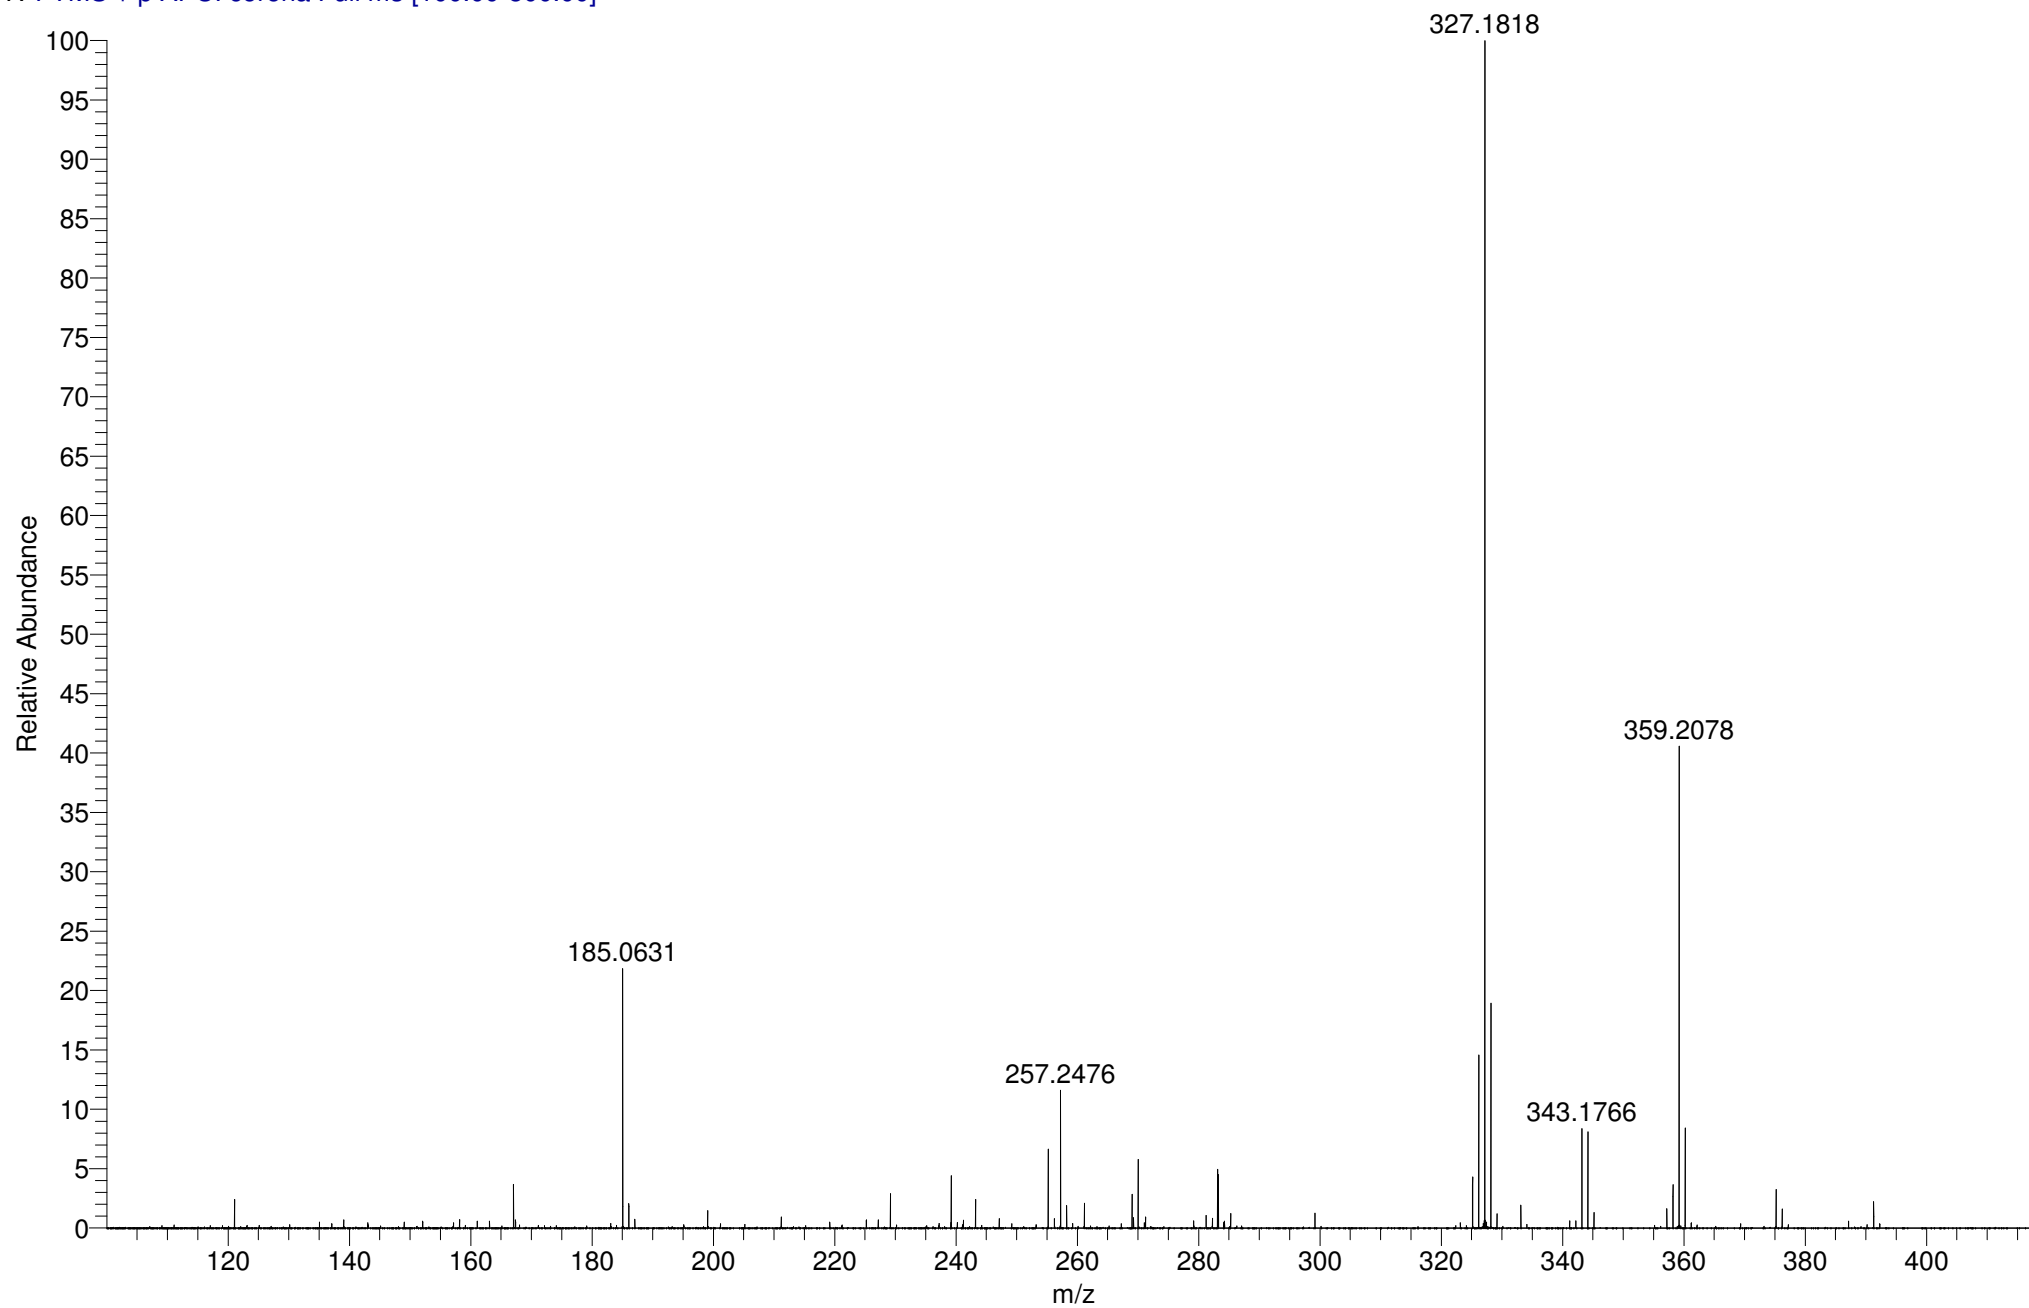

AET9-4 MW=542?  
ASAP(SOLID)

EPSRC National Centre Swansea  
LTQ Orbitrap XL

Thrup  
06/11/2012 12:17:45

BRASHE234-PG-HASP #45-50 RT: 1.26-1.41 AV: 6 SM: 7G NL: 2.61E6  
T: FTMS + p APCI corona Full ms [100.00-800.00]

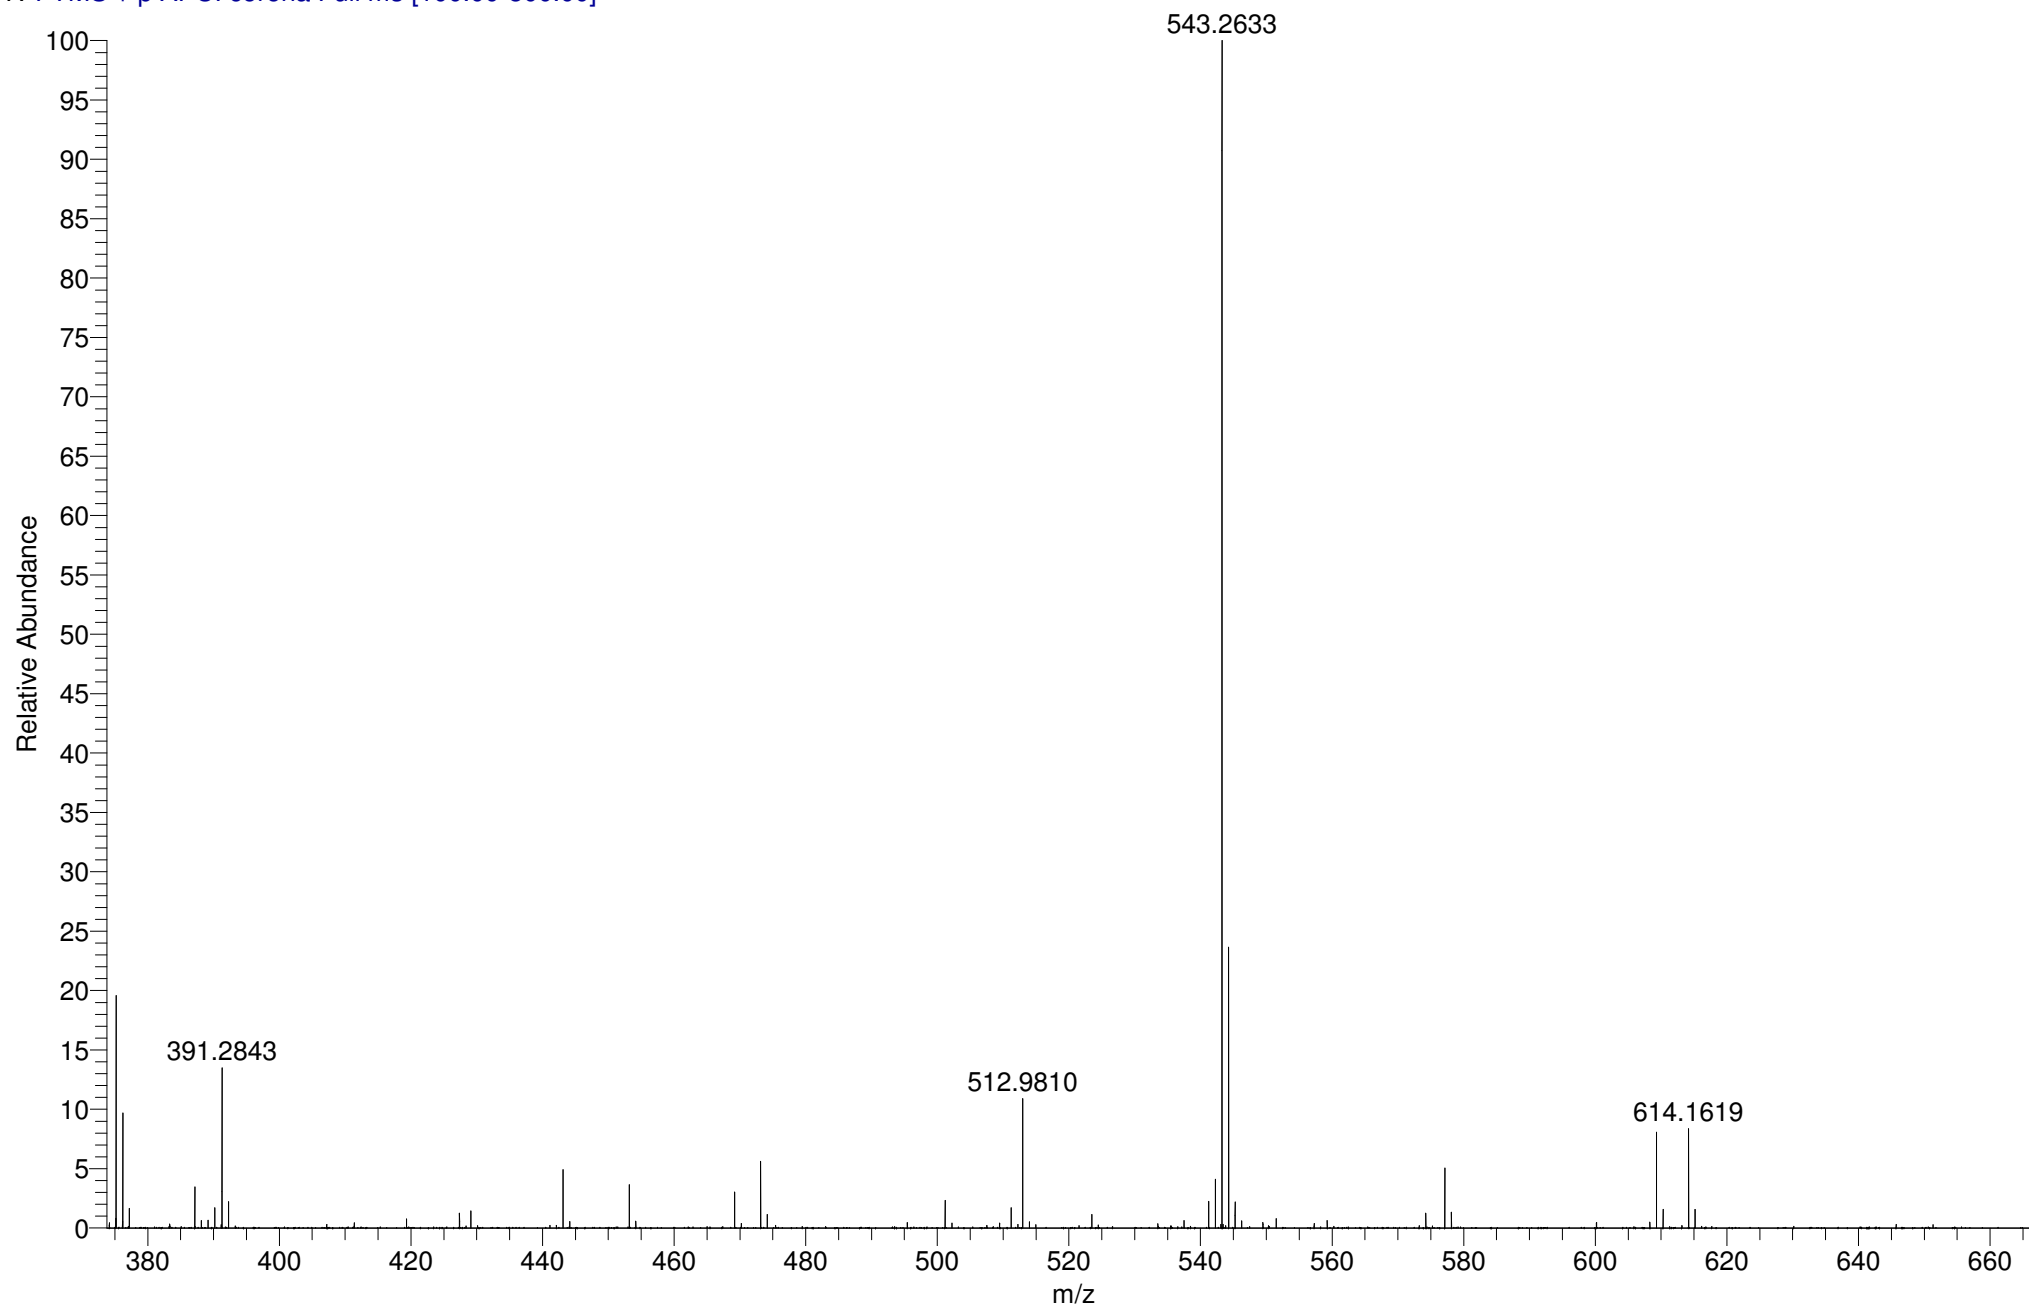

SM: 7G

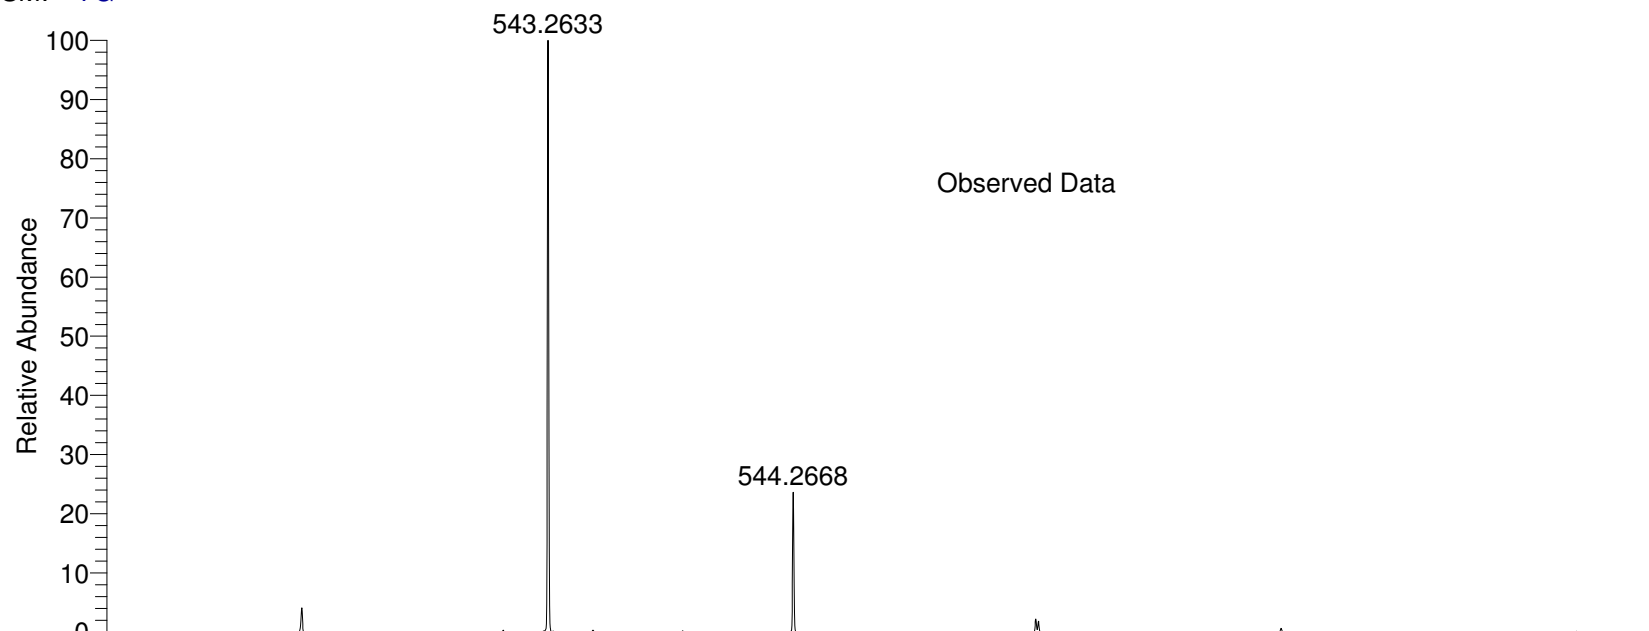

NL:  
2.61E6  
BRASHE234-PG-HASP#45-50  
RT: 1.26-1.41 AV: 6 T: FTMS  
+ p APCI corona Full ms  
[100.00-800.00]

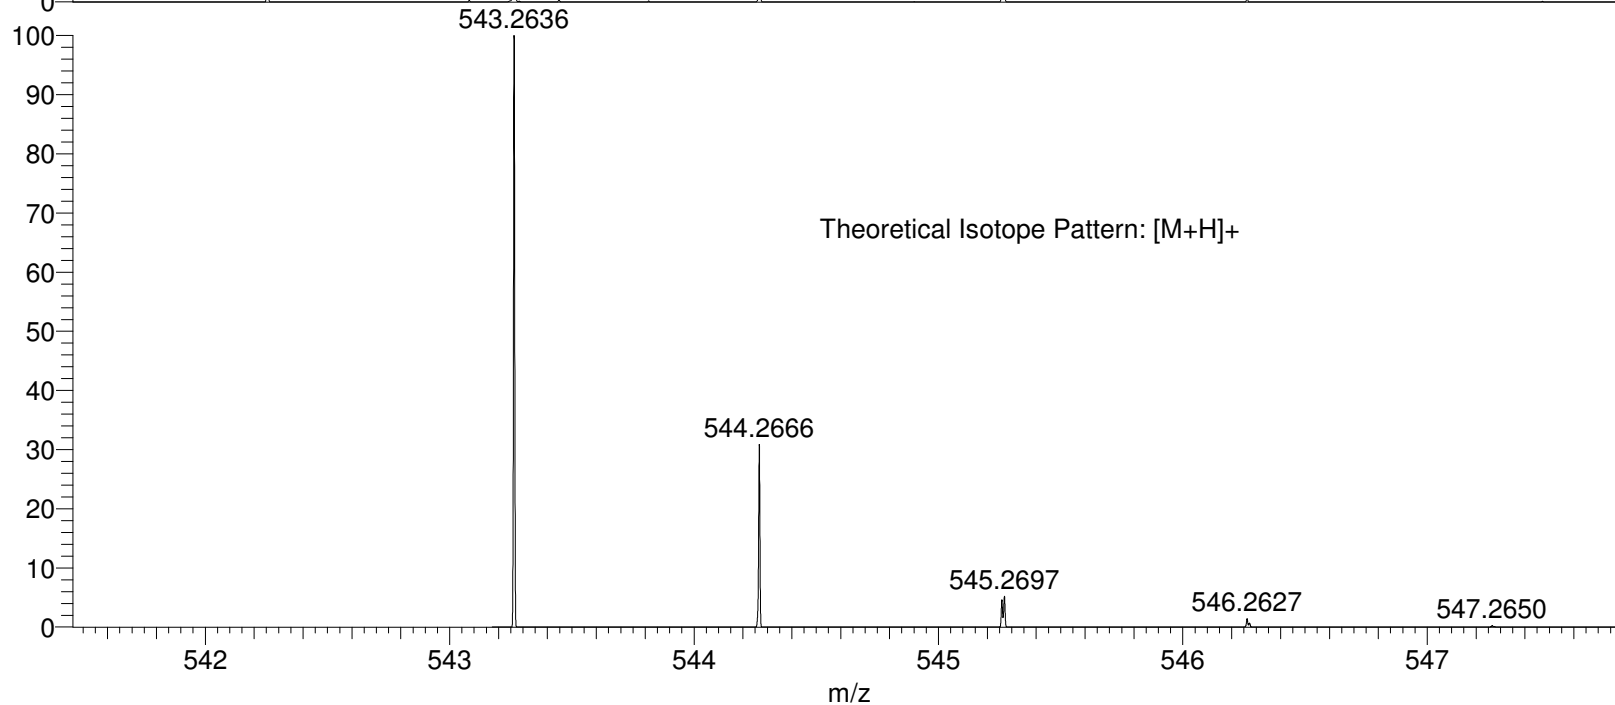

NL:  
1.60E4  
C<sub>28</sub>H<sub>38</sub>N<sub>4</sub>O<sub>5</sub>SH:  
C<sub>28</sub>H<sub>39</sub>N<sub>4</sub>O<sub>5</sub>S<sub>1</sub>  
p (gss, s /p:40) Chrg 1  
R: 100000 Res .Pwr . @FWHM



Isotope:           Min. .. Max.  
 14 N               0....16  
 16 O               0....15  
 12 C               0....80  
 1 H                0....100  
 23 Na              0....0  
 32 S               0....3  
 Tolerance Window: +- 5.00 ppm  
 Db/Ring Equiv:   -3.. 100  
 Fits:              100

N-Rule: Do not use  
 Charge: 1

| Mass     | Theoretical Mass | Delta [ppm] | RDB  | Composition                                                                    |
|----------|------------------|-------------|------|--------------------------------------------------------------------------------|
| 543.2633 | 543.2634         | -0.2        | 8.5  | C <sub>20</sub> H <sub>35</sub> O <sub>8</sub> N <sub>10</sub>                 |
|          | 543.2634         | -0.2        | 3.0  | C <sub>21</sub> H <sub>41</sub> O <sub>13</sub> N <sub>3</sub>                 |
|          | 543.2631         | 0.4         | 5.5  | C <sub>28</sub> H <sub>47</sub> O <sub>4</sub> S <sub>3</sub>                  |
|          | 543.2636         | -0.5        | 17.0 | C <sub>27</sub> H <sub>33</sub> N <sub>11</sub> S <sub>1</sub>                 |
|          | 543.2636         | -0.5        | 11.5 | C <sub>28</sub> H <sub>39</sub> O <sub>5</sub> N <sub>4</sub> S <sub>1</sub>   |
|          | 543.2636         | -0.6        | -1.5 | C <sub>13</sub> H <sub>43</sub> O <sub>5</sub> N <sub>12</sub> S <sub>3</sub>  |
|          | 543.2629         | 0.7         | 2.5  | C <sub>20</sub> H <sub>43</sub> O <sub>7</sub> N <sub>6</sub> S <sub>2</sub>   |
|          | 543.2629         | 0.7         | 8.0  | C <sub>19</sub> H <sub>37</sub> O <sub>2</sub> N <sub>13</sub> S <sub>2</sub>  |
|          | 543.2629         | 0.8         | 21.0 | C <sub>34</sub> H <sub>33</sub> O <sub>2</sub> N <sub>5</sub>                  |
|          | 543.2627         | 1.0         | -0.5 | C <sub>12</sub> H <sub>39</sub> O <sub>10</sub> N <sub>12</sub> S <sub>1</sub> |
|          | 543.2641         | -1.4        | 4.5  | C <sub>13</sub> H <sub>35</sub> O <sub>6</sub> N <sub>16</sub> S <sub>1</sub>  |
|          | 543.2641         | -1.4        | -1.0 | C <sub>14</sub> H <sub>41</sub> O <sub>11</sub> N <sub>9</sub> S <sub>1</sub>  |
|          | 543.2624         | 1.6         | 15.0 | C <sub>34</sub> H <sub>41</sub> O <sub>1</sub> N <sub>1</sub> S <sub>2</sub>   |
|          | 543.2642         | -1.7        | 20.5 | C <sub>36</sub> H <sub>35</sub> O <sub>3</sub> N <sub>2</sub>                  |
|          | 543.2643         | -1.8        | 7.5  | C <sub>21</sub> H <sub>39</sub> O <sub>3</sub> N <sub>10</sub> S <sub>2</sub>  |
|          | 543.2643         | -1.8        | 2.0  | C <sub>22</sub> H <sub>45</sub> O <sub>8</sub> N <sub>3</sub> S <sub>2</sub>   |
|          | 543.2623         | 1.9         | -1.0 | C <sub>11</sub> H <sub>41</sub> O <sub>4</sub> N <sub>15</sub> S <sub>3</sub>  |
|          | 543.2622         | 2.0         | 6.5  | C <sub>27</sub> H <sub>43</sub> O <sub>9</sub> S <sub>1</sub>                  |
|          | 543.2622         | 2.0         | 12.0 | C <sub>26</sub> H <sub>37</sub> O <sub>4</sub> N <sub>7</sub> S <sub>1</sub>   |
|          | 543.2644         | -2.1        | 10.5 | C <sub>29</sub> H <sub>43</sub> N <sub>4</sub> S <sub>3</sub>                  |
|          | 543.2620         | 2.3         | 3.5  | C <sub>19</sub> H <sub>39</sub> O <sub>12</sub> N <sub>6</sub>                 |
|          | 543.2620         | 2.3         | 9.0  | C <sub>18</sub> H <sub>33</sub> O <sub>7</sub> N <sub>13</sub>                 |
|          | 543.2647         | -2.6        | 13.5 | C <sub>21</sub> H <sub>31</sub> O <sub>4</sub> N <sub>14</sub>                 |
|          | 543.2647         | -2.6        | 8.0  | C <sub>22</sub> H <sub>37</sub> O <sub>9</sub> N <sub>7</sub>                  |
|          | 543.2647         | -2.6        | 2.5  | C <sub>23</sub> H <sub>43</sub> O <sub>14</sub>                                |
|          | 543.2618         | 2.8         | 6.0  | C <sub>26</sub> H <sub>45</sub> O <sub>3</sub> N <sub>3</sub> S <sub>3</sub>   |
|          | 543.2649         | -3.0        | 16.5 | C <sub>29</sub> H <sub>35</sub> O <sub>1</sub> N <sub>8</sub> S <sub>1</sub>   |
|          | 543.2649         | -3.0        | 11.0 | C <sub>30</sub> H <sub>41</sub> O <sub>6</sub> N <sub>1</sub> S <sub>1</sub>   |
|          | 543.2649         | -3.0        | 3.5  | C <sub>14</sub> H <sub>39</sub> O <sub>1</sub> N <sub>16</sub> S <sub>3</sub>  |
|          | 543.2649         | -3.0        | -2.0 | C <sub>15</sub> H <sub>45</sub> O <sub>6</sub> N <sub>9</sub> S <sub>3</sub>   |
|          | 543.2616         | 3.2         | -2.5 | C <sub>19</sub> H <sub>47</sub> O <sub>11</sub> N <sub>2</sub> S <sub>2</sub>  |

| Mass     | Theoretical<br>Mass | Delta<br>[ppm] | RDB  | Composition                                                                   |
|----------|---------------------|----------------|------|-------------------------------------------------------------------------------|
| 543.2616 | 543.2616            | 3.2            | 3.0  | C <sub>18</sub> H <sub>41</sub> O <sub>6</sub> N <sub>9</sub> S <sub>2</sub>  |
| 543.2616 | 543.2616            | 3.2            | 8.5  | C <sub>17</sub> H <sub>35</sub> O <sub>1</sub> N <sub>16</sub> S <sub>2</sub> |
| 543.2615 | 543.2615            | 3.2            | 16.0 | C <sub>33</sub> H <sub>37</sub> O <sub>6</sub> N <sub>1</sub>                 |
| 543.2615 | 543.2615            | 3.3            | 21.5 | C <sub>32</sub> H <sub>31</sub> O <sub>1</sub> N <sub>8</sub>                 |
| 543.2614 | 543.2614            | 3.5            | 0.0  | C <sub>10</sub> H <sub>37</sub> O <sub>9</sub> N <sub>15</sub> S <sub>1</sub> |
| 543.2654 | 543.2654            | -3.9           | 4.0  | C <sub>15</sub> H <sub>37</sub> O <sub>7</sub> N <sub>13</sub> S <sub>1</sub> |
| 543.2654 | 543.2654            | -3.9           | -1.5 | C <sub>16</sub> H <sub>43</sub> O <sub>12</sub> N <sub>6</sub> S <sub>1</sub> |
| 543.2611 | 543.2611            | 4.1            | 15.5 | C <sub>32</sub> H <sub>39</sub> N <sub>4</sub> S <sub>2</sub>                 |
| 543.2656 | 543.2656            | -4.2           | 7.0  | C <sub>23</sub> H <sub>41</sub> O <sub>4</sub> N <sub>7</sub> S <sub>2</sub>  |
| 543.2656 | 543.2656            | -4.2           | 1.5  | C <sub>24</sub> H <sub>47</sub> O <sub>9</sub> S <sub>2</sub>                 |
| 543.2609 | 543.2609            | 4.4            | 7.0  | C <sub>25</sub> H <sub>41</sub> O <sub>8</sub> N <sub>3</sub> S <sub>1</sub>  |
| 543.2609 | 543.2609            | 4.5            | 12.5 | C <sub>24</sub> H <sub>35</sub> O <sub>3</sub> N <sub>10</sub> S <sub>1</sub> |
| 543.2658 | 543.2658            | -4.6           | 10.0 | C <sub>31</sub> H <sub>45</sub> O <sub>1</sub> N <sub>1</sub> S <sub>3</sub>  |
| 543.2607 | 543.2607            | 4.8            | 4.0  | C <sub>17</sub> H <sub>37</sub> O <sub>11</sub> N <sub>9</sub>                |
| 543.2607 | 543.2607            | 4.8            | 9.5  | C <sub>16</sub> H <sub>31</sub> O <sub>6</sub> N <sub>16</sub>                |

aet9-20-1 MW=556?  
(DCM)/MeOH + NH4OAc

# Compound 24

EPSRC National Centre Swansea  
LTQ Orbitrap XL

adam throup  
14/01/2013 16:43:46

BRASHE247-OJ-HNESP #27-50 RT: 0.72-1.28 AV: 22 SM: 7G NL: 7.74E7

T: FTMS + p NSI Full ms [120.00-2000.00]

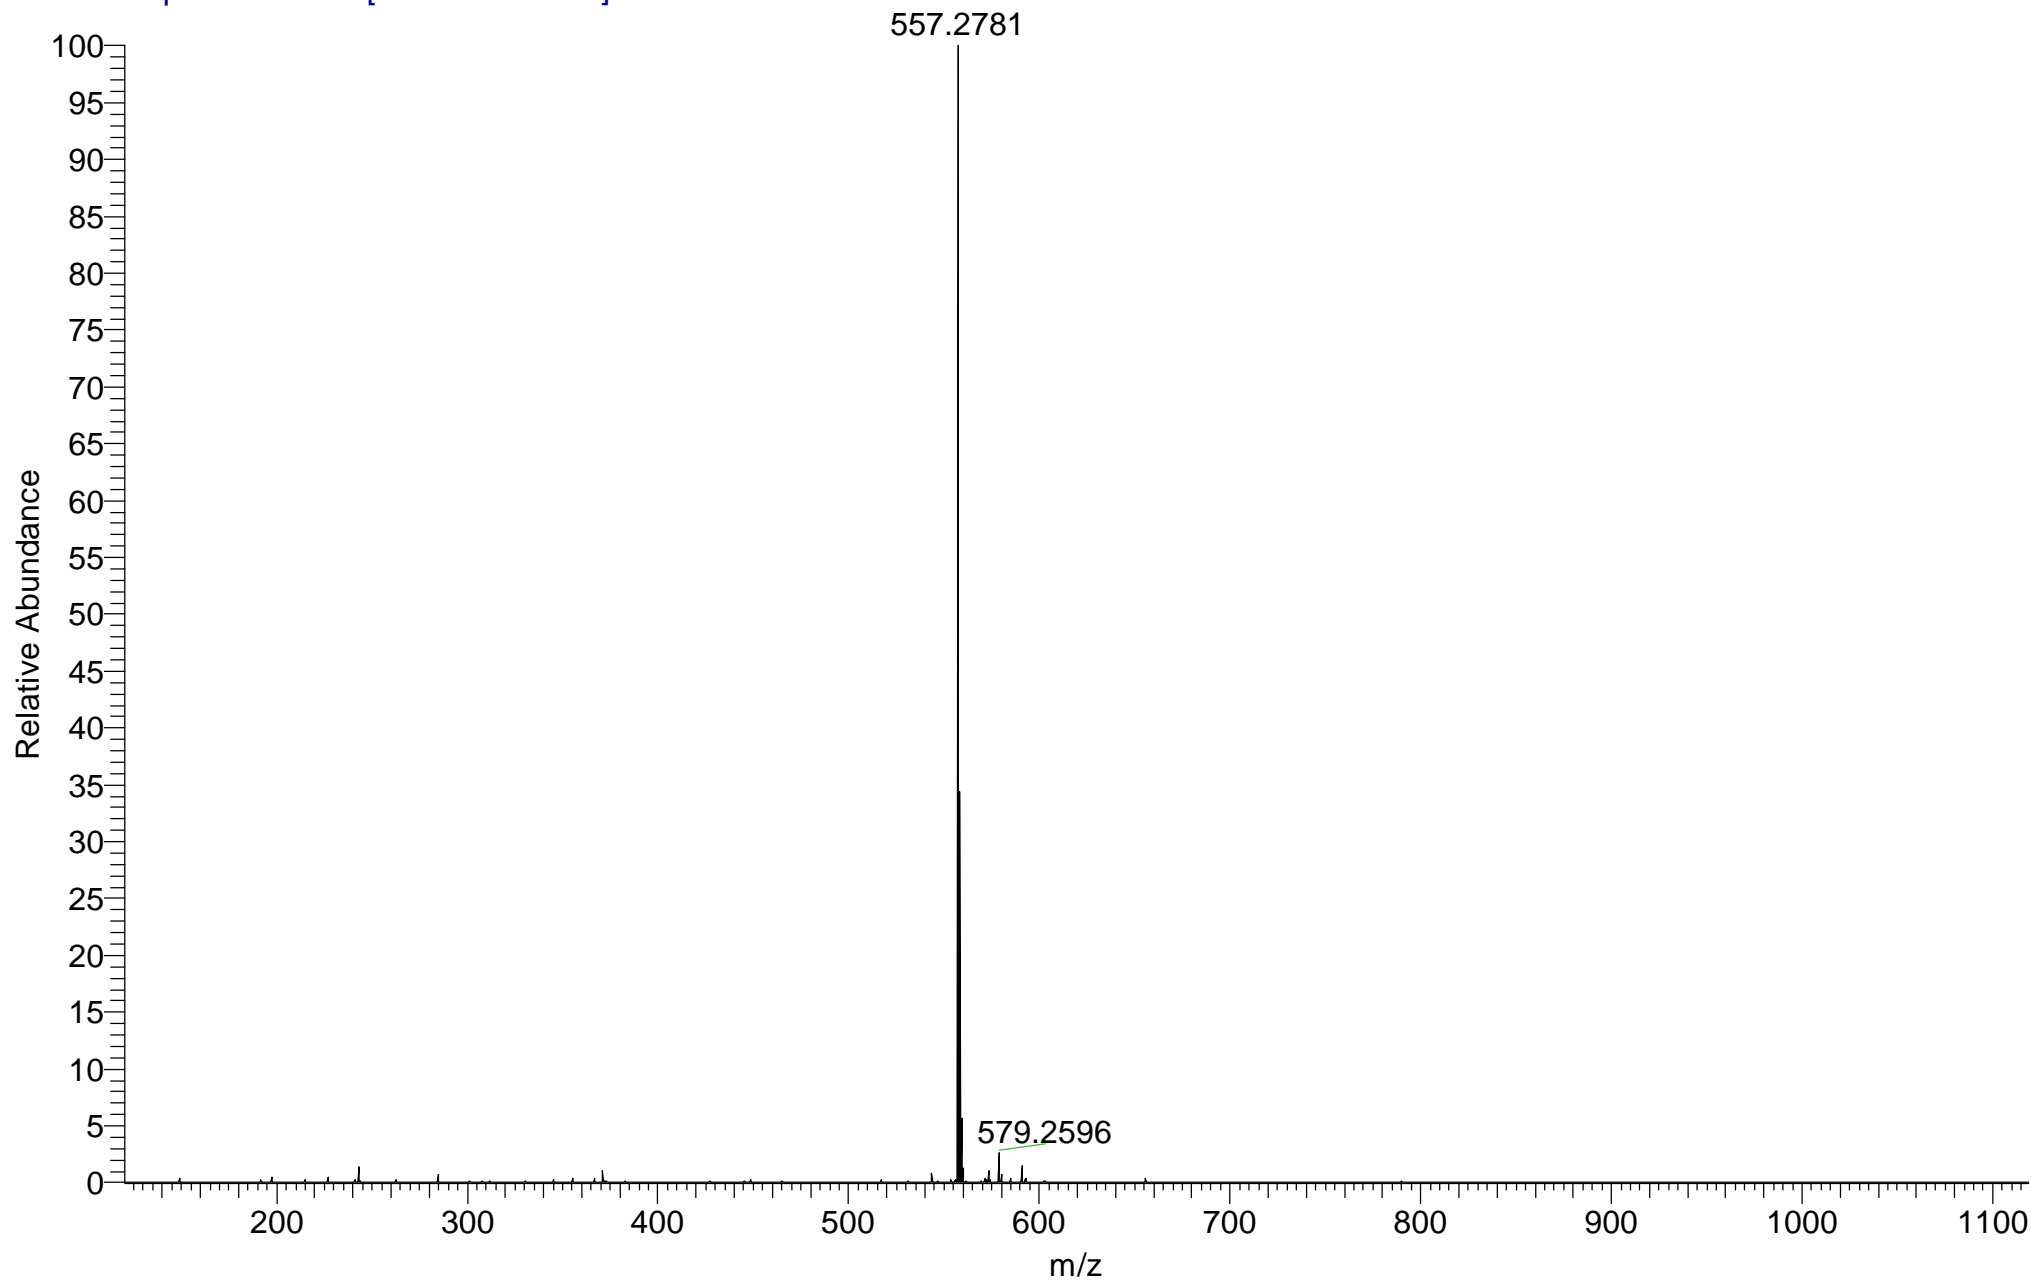

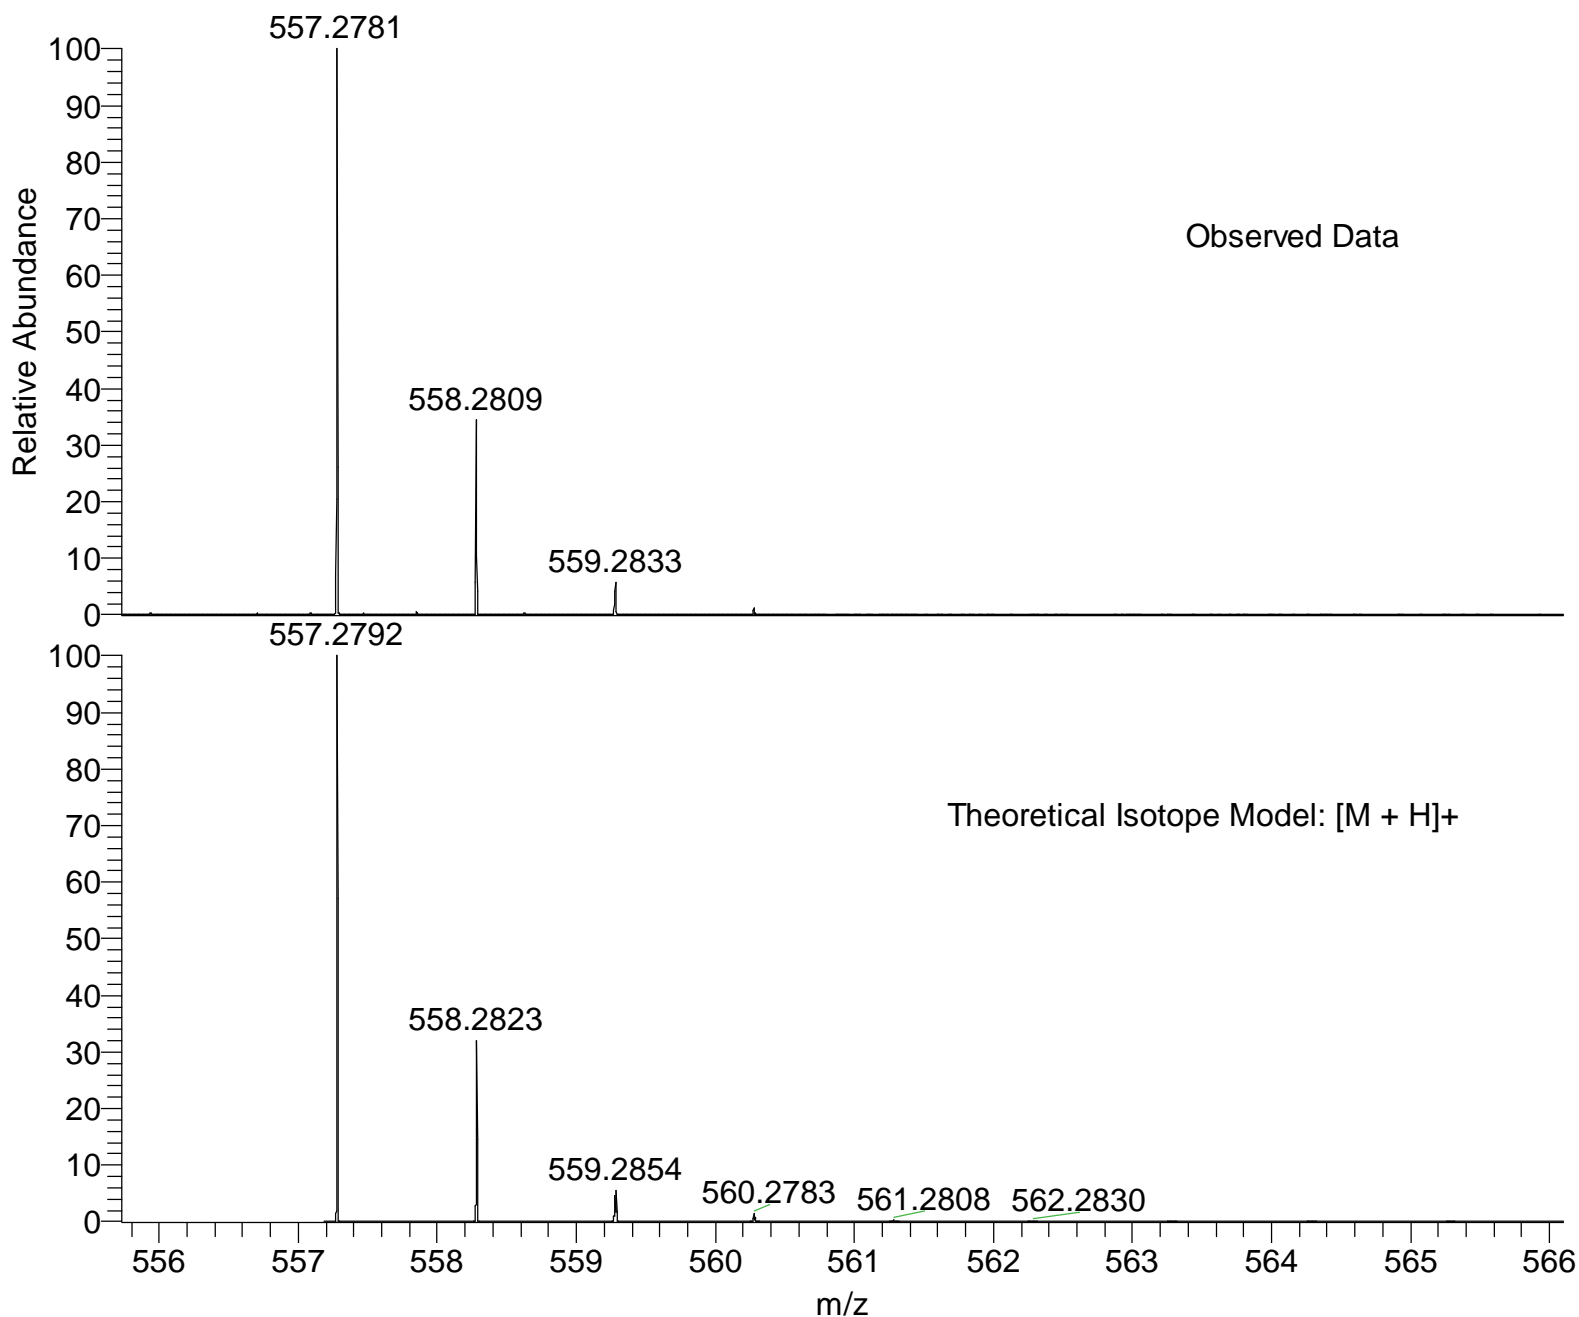

NL:  
7.74E7  
BRASHE247-OJ-HNESP#27-  
50 RT: 0.72-1.28 AV: 22 T:  
FTMS + p NSI Full ms  
[120.00-2000.00]

NL:  
1.58E4  
C<sub>29</sub>H<sub>40</sub>N<sub>4</sub>O<sub>5</sub>SH:  
C<sub>29</sub>H<sub>41</sub>N<sub>4</sub>O<sub>5</sub>S<sub>1</sub>  
p (gss, s /p:40) Chrg 1  
R: 100000 Res .Pwr . @FWHM

Isotope:           Min. .. Max.  
 14 N               0....14  
 16 O               0....15  
 12 C               0....60  
 1 H                0....80  
 23 Na              0....0  
 32 S               0....5

Tolerance Window:           +- 5.00 ppm  
 Db/Ring Equiv: -3.. 100       N-Rule: Do not use  
 Fits:               200           Charge: 1

| Mass     | Theoretical<br>Mass | Delta<br>[ppm] | RDB  | Composition                                                                    |
|----------|---------------------|----------------|------|--------------------------------------------------------------------------------|
| 557.2781 | 557.2781            | 0.0            | 2.0  | C <sub>20</sub> H <sub>47</sub> O <sub>1</sub> N <sub>9</sub> S <sub>4</sub>   |
|          | 557.2781            | 0.1            | 15.0 | C <sub>35</sub> H <sub>43</sub> O <sub>1</sub> N <sub>1</sub> S <sub>2</sub>   |
|          | 557.2779            | 0.4            | 6.5  | C <sub>28</sub> H <sub>45</sub> O <sub>9</sub> S <sub>1</sub>                  |
|          | 557.2779            | 0.4            | 12.0 | C <sub>27</sub> H <sub>39</sub> O <sub>4</sub> N <sub>7</sub> S <sub>1</sub>   |
|          | 557.2784            | -0.5           | -0.5 | C <sub>13</sub> H <sub>41</sub> O <sub>10</sub> N <sub>12</sub> S <sub>1</sub> |
|          | 557.2777            | 0.7            | 3.5  | C <sub>20</sub> H <sub>41</sub> O <sub>12</sub> N <sub>6</sub>                 |
|          | 557.2777            | 0.7            | 9.0  | C <sub>19</sub> H <sub>35</sub> O <sub>7</sub> N <sub>13</sub>                 |
|          | 557.2785            | -0.8           | 21.0 | C <sub>35</sub> H <sub>35</sub> O <sub>2</sub> N <sub>5</sub>                  |
|          | 557.2786            | -0.8           | 8.0  | C <sub>20</sub> H <sub>39</sub> O <sub>2</sub> N <sub>13</sub> S <sub>2</sub>  |
|          | 557.2786            | -0.8           | 2.5  | C <sub>21</sub> H <sub>45</sub> O <sub>7</sub> N <sub>6</sub> S <sub>2</sub>   |
|          | 557.2787            | -1.2           | 5.5  | C <sub>29</sub> H <sub>49</sub> O <sub>4</sub> S <sub>3</sub>                  |
|          | 557.2774            | 1.2            | 6.0  | C <sub>27</sub> H <sub>47</sub> O <sub>3</sub> N <sub>3</sub> S <sub>3</sub>   |
|          | 557.2772            | 1.6            | -2.5 | C <sub>20</sub> H <sub>49</sub> O <sub>11</sub> N <sub>2</sub> S <sub>2</sub>  |
|          | 557.2772            | 1.6            | 3.0  | C <sub>19</sub> H <sub>43</sub> O <sub>6</sub> N <sub>9</sub> S <sub>2</sub>   |
|          | 557.2772            | 1.6            | 16.0 | C <sub>34</sub> H <sub>39</sub> O <sub>6</sub> N <sub>1</sub>                  |
|          | 557.2772            | 1.6            | 21.5 | C <sub>33</sub> H <sub>33</sub> O <sub>1</sub> N <sub>8</sub>                  |
|          | 557.2790            | -1.7           | 8.5  | C <sub>21</sub> H <sub>37</sub> O <sub>8</sub> N <sub>10</sub>                 |
|          | 557.2790            | -1.7           | 3.0  | C <sub>22</sub> H <sub>43</sub> O <sub>13</sub> N <sub>3</sub>                 |
|          | 557.2792            | -2.0           | 17.0 | C <sub>28</sub> H <sub>35</sub> N <sub>11</sub> S <sub>1</sub>                 |
|          | 557.2792            | -2.0           | 11.5 | C <sub>29</sub> H <sub>41</sub> O <sub>5</sub> N <sub>4</sub> S <sub>1</sub>   |
|          | 557.2793            | -2.1           | -1.5 | C <sub>14</sub> H <sub>45</sub> O <sub>5</sub> N <sub>12</sub> S <sub>3</sub>  |
|          | 557.2794            | -2.4           | 1.5  | C <sub>22</sub> H <sub>49</sub> O <sub>2</sub> N <sub>6</sub> S <sub>4</sub>   |
|          | 557.2768            | 2.4            | -3.0 | C <sub>19</sub> H <sub>51</sub> O <sub>5</sub> N <sub>5</sub> S <sub>4</sub>   |
|          | 557.2767            | 2.4            | 2.5  | C <sub>18</sub> H <sub>45</sub> N <sub>12</sub> S <sub>4</sub>                 |
|          | 557.2767            | 2.5            | 15.5 | C <sub>33</sub> H <sub>41</sub> N <sub>4</sub> S <sub>2</sub>                  |
|          | 557.2765            | 2.8            | 7.0  | C <sub>26</sub> H <sub>43</sub> O <sub>8</sub> N <sub>3</sub> S <sub>1</sub>   |
|          | 557.2765            | 2.8            | 12.5 | C <sub>25</sub> H <sub>37</sub> O <sub>3</sub> N <sub>10</sub> S <sub>1</sub>  |
|          | 557.2797            | -2.9           | -1.0 | C <sub>15</sub> H <sub>43</sub> O <sub>11</sub> N <sub>9</sub> S <sub>1</sub>  |
|          | 557.2764            | 3.1            | 4.0  | C <sub>18</sub> H <sub>39</sub> O <sub>11</sub> N <sub>9</sub>                 |
|          | 557.2799            | -3.2           | 20.5 | C <sub>37</sub> H <sub>37</sub> O <sub>3</sub> N <sub>2</sub>                  |
|          | 557.2799            | -3.2           | 7.5  | C <sub>22</sub> H <sub>41</sub> O <sub>3</sub> N <sub>10</sub> S <sub>2</sub>  |

| Mass     | Theoretical<br>Mass | Delta<br>[ppm] | RDB  | Composition                                                                   |
|----------|---------------------|----------------|------|-------------------------------------------------------------------------------|
| 557.2799 | 557.2799            | -3.2           | 2.0  | C <sub>23</sub> H <sub>47</sub> O <sub>8</sub> N <sub>3</sub> S <sub>2</sub>  |
| 557.2801 | 557.2801            | -3.6           | 10.5 | C <sub>30</sub> H <sub>45</sub> N <sub>4</sub> S <sub>3</sub>                 |
| 557.2801 | 557.2801            | -3.6           | -2.5 | C <sub>15</sub> H <sub>49</sub> N <sub>12</sub> S <sub>5</sub>                |
| 557.2761 | 557.2761            | 3.7            | 6.5  | C <sub>25</sub> H <sub>45</sub> O <sub>2</sub> N <sub>6</sub> S <sub>3</sub>  |
| 557.2759 | 557.2759            | 4.0            | -2.0 | C <sub>18</sub> H <sub>47</sub> O <sub>10</sub> N <sub>5</sub> S <sub>2</sub> |
| 557.2759 | 557.2759            | 4.0            | 3.5  | C <sub>17</sub> H <sub>41</sub> O <sub>5</sub> N <sub>12</sub> S <sub>2</sub> |
| 557.2758 | 557.2758            | 4.0            | 16.5 | C <sub>32</sub> H <sub>37</sub> O <sub>5</sub> N <sub>4</sub>                 |
| 557.2758 | 557.2758            | 4.1            | 22.0 | C <sub>31</sub> H <sub>31</sub> N <sub>11</sub>                               |
| 557.2804 | 557.2804            | -4.1           | 13.5 | C <sub>22</sub> H <sub>33</sub> O <sub>4</sub> N <sub>14</sub>                |
| 557.2804 | 557.2804            | -4.1           | 8.0  | C <sub>23</sub> H <sub>39</sub> O <sub>9</sub> N <sub>7</sub>                 |
| 557.2804 | 557.2804            | -4.1           | 2.5  | C <sub>24</sub> H <sub>45</sub> O <sub>14</sub>                               |
| 557.2806 | 557.2806            | -4.4           | 16.5 | C <sub>30</sub> H <sub>37</sub> O <sub>1</sub> N <sub>8</sub> S <sub>1</sub>  |
| 557.2806 | 557.2806            | -4.4           | 11.0 | C <sub>31</sub> H <sub>43</sub> O <sub>6</sub> N <sub>1</sub> S <sub>1</sub>  |
| 557.2806 | 557.2806            | -4.5           | -2.0 | C <sub>16</sub> H <sub>47</sub> O <sub>6</sub> N <sub>9</sub> S <sub>3</sub>  |
| 557.2756 | 557.2756            | 4.5            | 0.5  | C <sub>25</sub> H <sub>53</sub> O <sub>1</sub> N <sub>2</sub> S <sub>5</sub>  |
| 557.2808 | 557.2808            | -4.8           | 1.0  | C <sub>24</sub> H <sub>51</sub> O <sub>3</sub> N <sub>3</sub> S <sub>4</sub>  |
| 557.2754 | 557.2754            | 4.8            | -2.5 | C <sub>17</sub> H <sub>49</sub> O <sub>4</sub> N <sub>8</sub> S <sub>4</sub>  |
| 557.2754 | 557.2754            | 4.9            | 10.5 | C <sub>32</sub> H <sub>45</sub> O <sub>4</sub> S <sub>2</sub>                 |

aet7-16 MW=227?  
(DCM)/MeOH + NH4OAc

# Compound 25

EPSRC National Centre Swansea  
LTQ Orbitrap XL

adam throup  
05/12/2011 13:10:59

BRASHE162-PV-HNESP #21-32 RT: 0.86-1.18 AV: 12 SM: 7G NL: 1.50E7

T: FTMS + p NSI Full ms [120.00-2000.00]

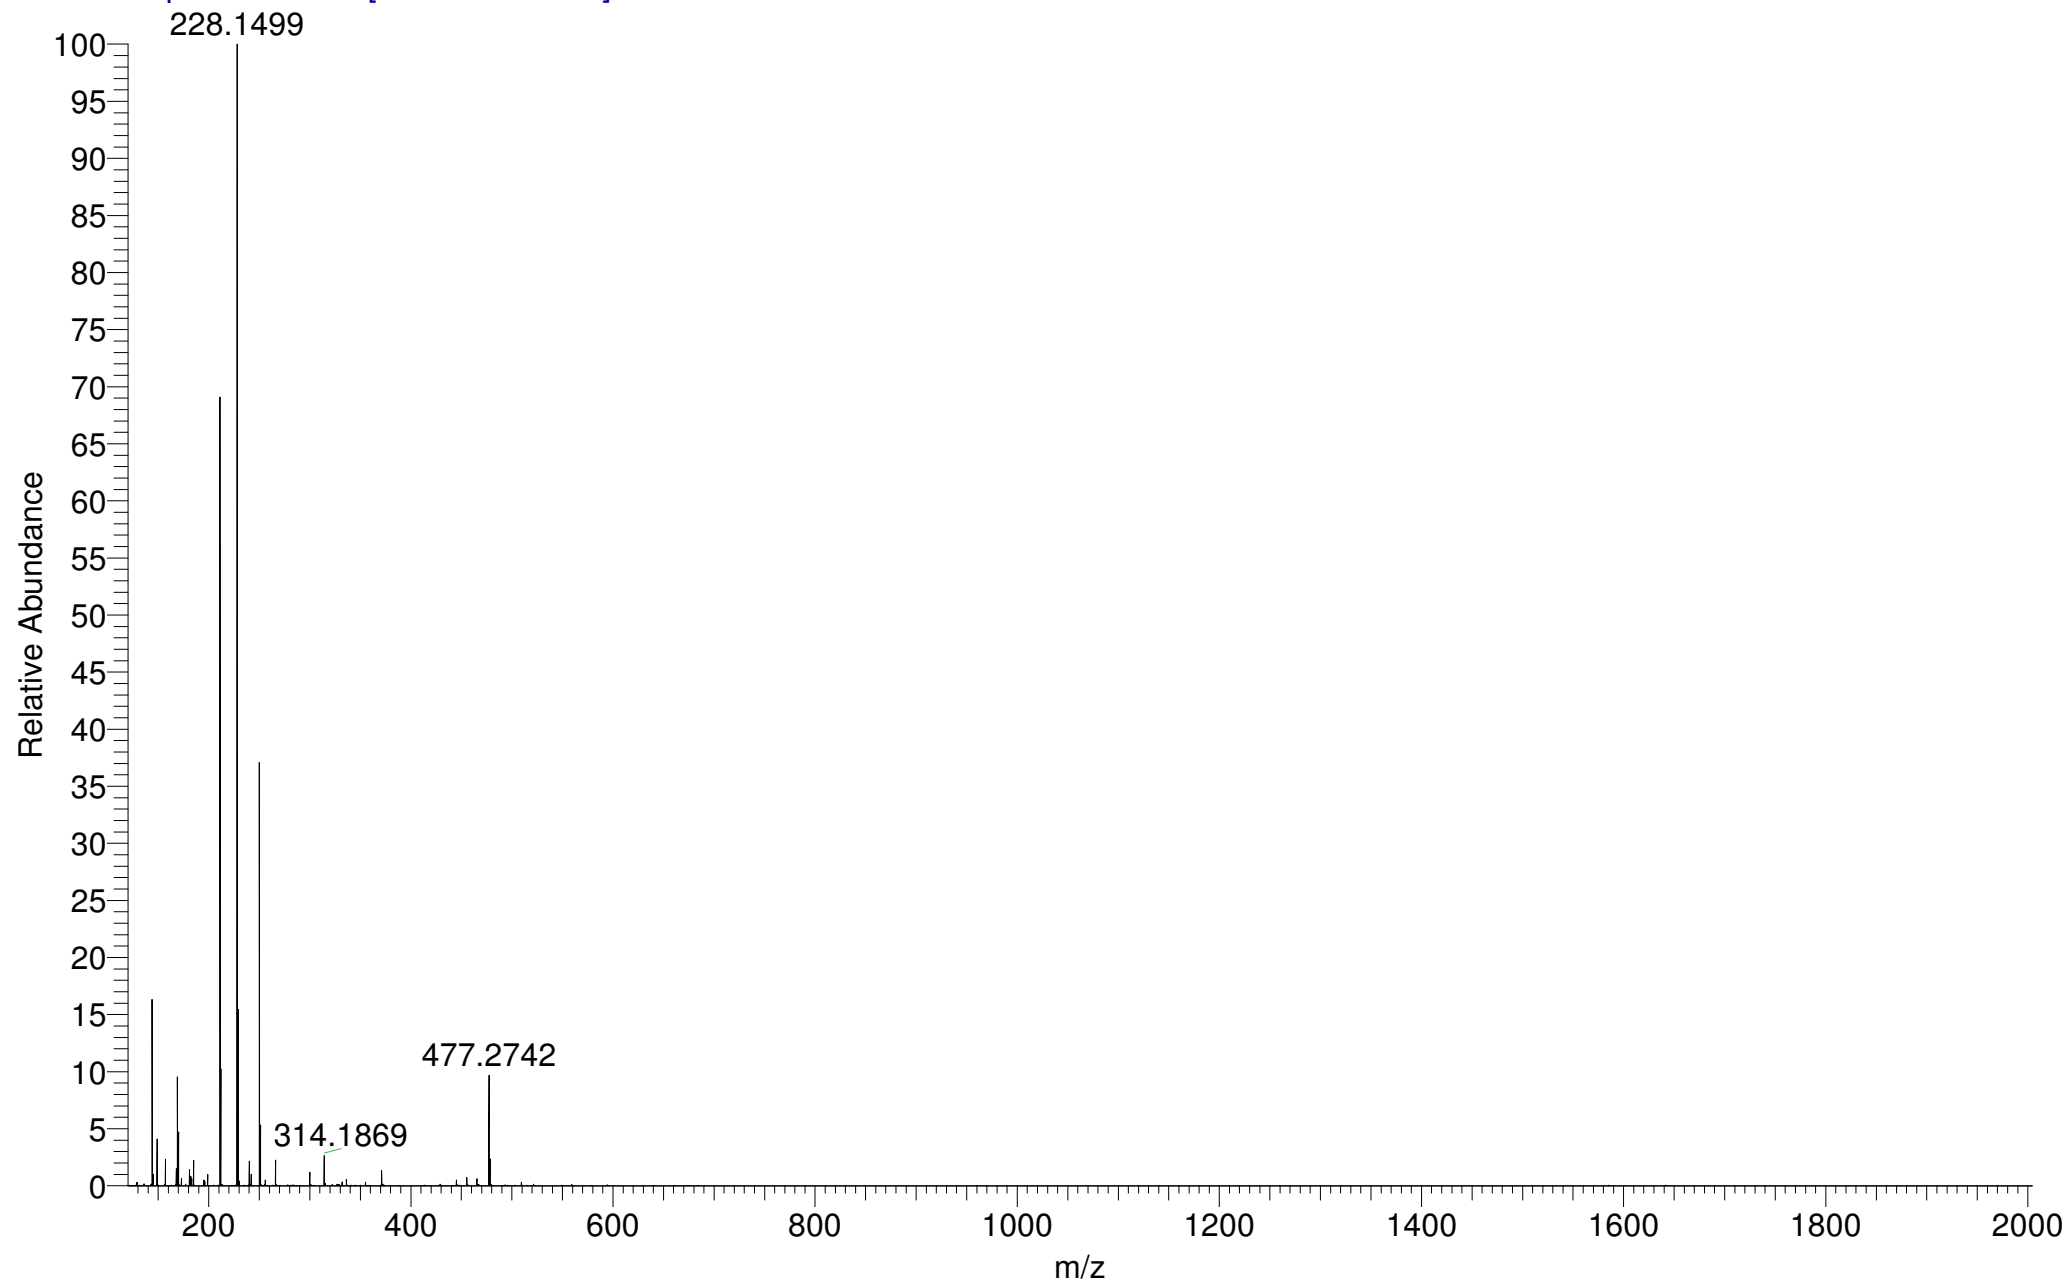

BRASHE162-PV-HNESP #21-32 RT: 0.86-1.18 AV: 12 SM: 7G NL: 1.50E7  
T: FTMS + p NSI Full ms [120.00-2000.00]

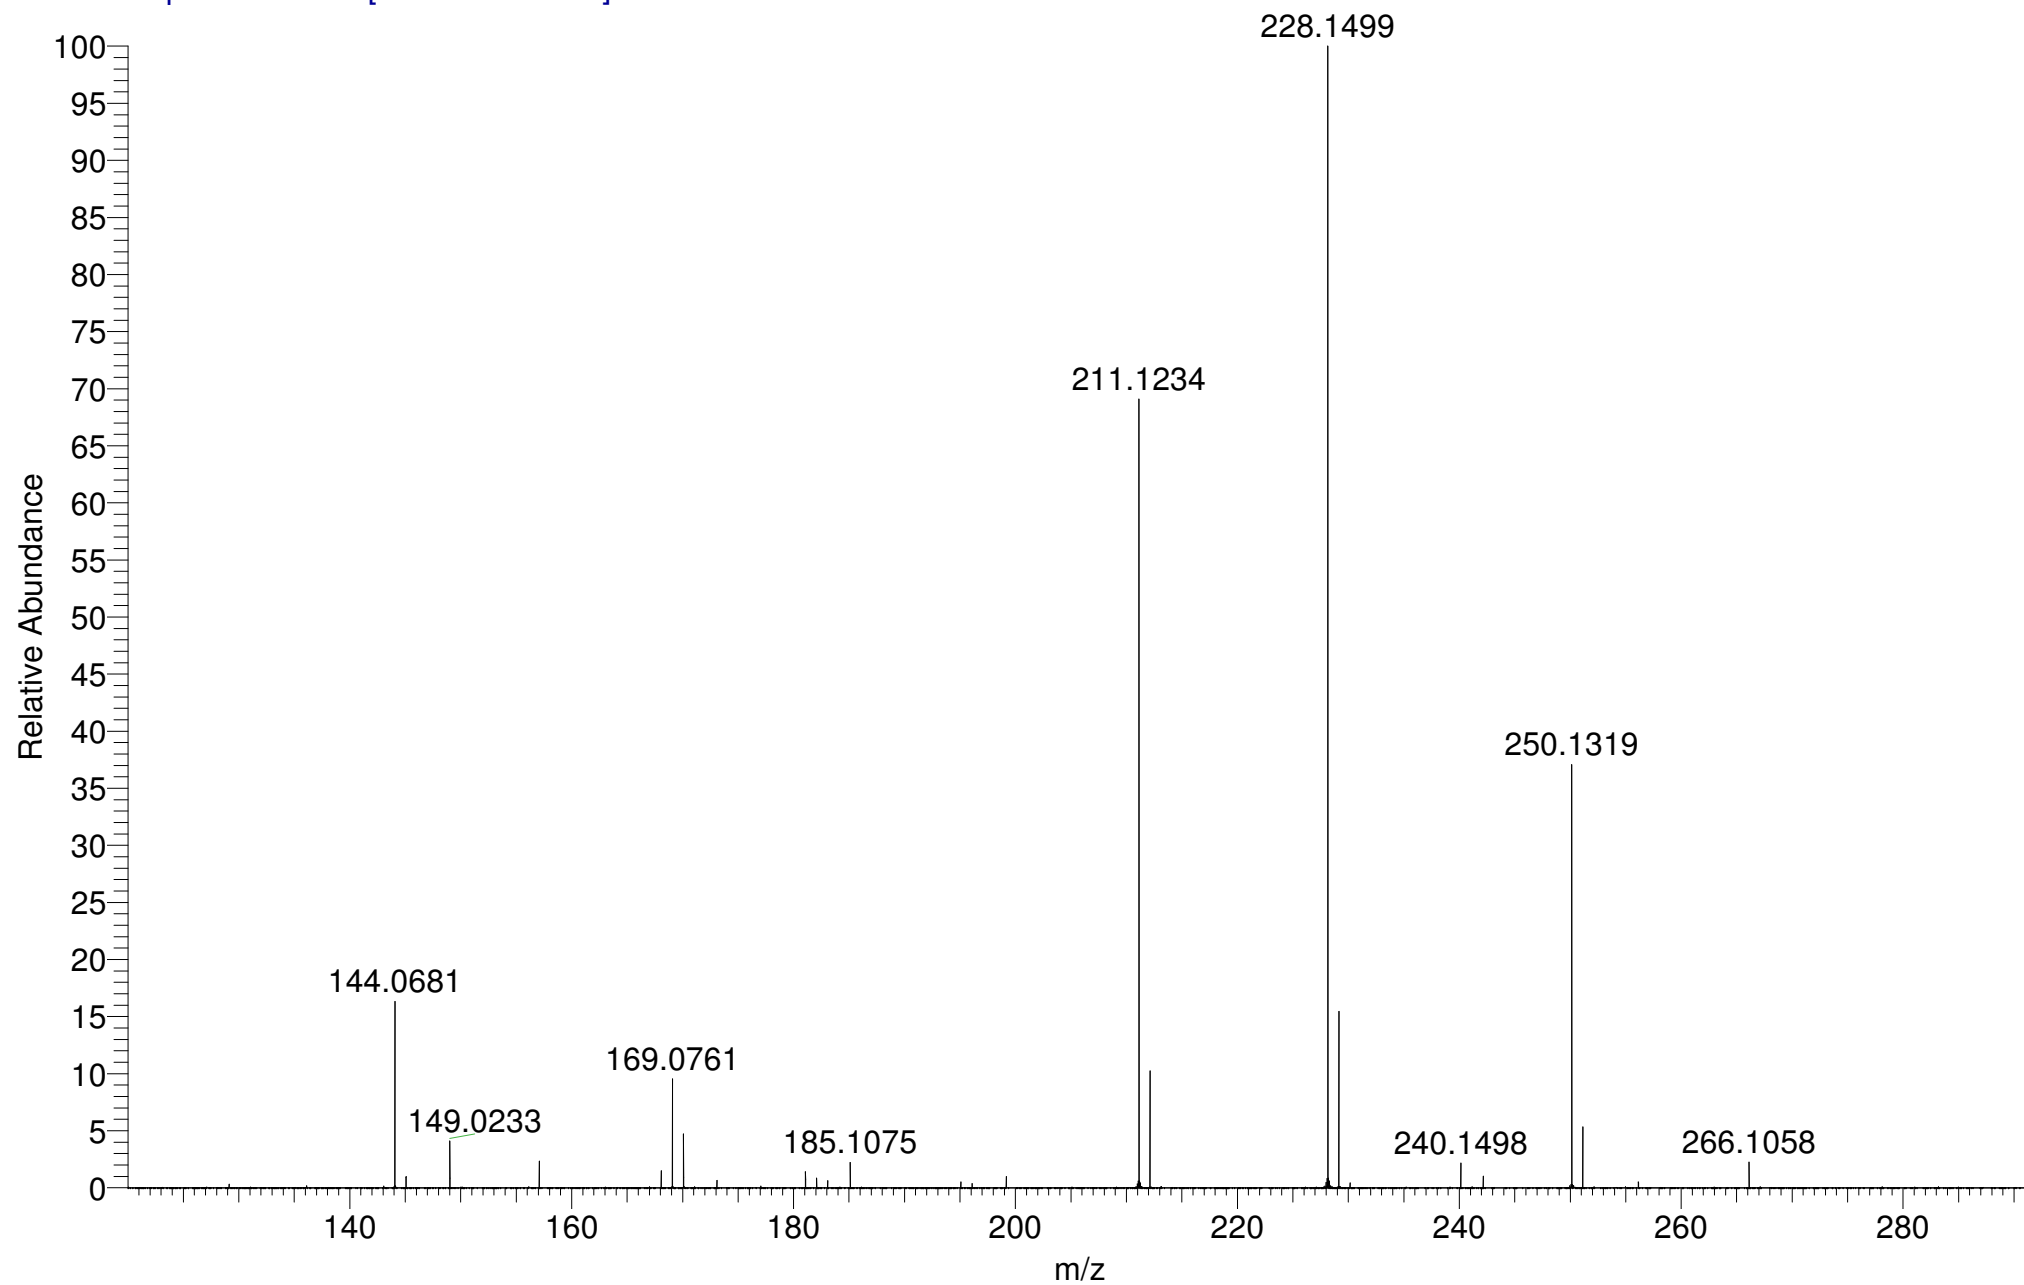



BRASHE162-PV-HNESP #21-32 RT: 0.86-1.18 AV: 12 SM: 7G NL: 1.50E7  
T: FTMS + p NSI Full ms [120.00-2000.00]

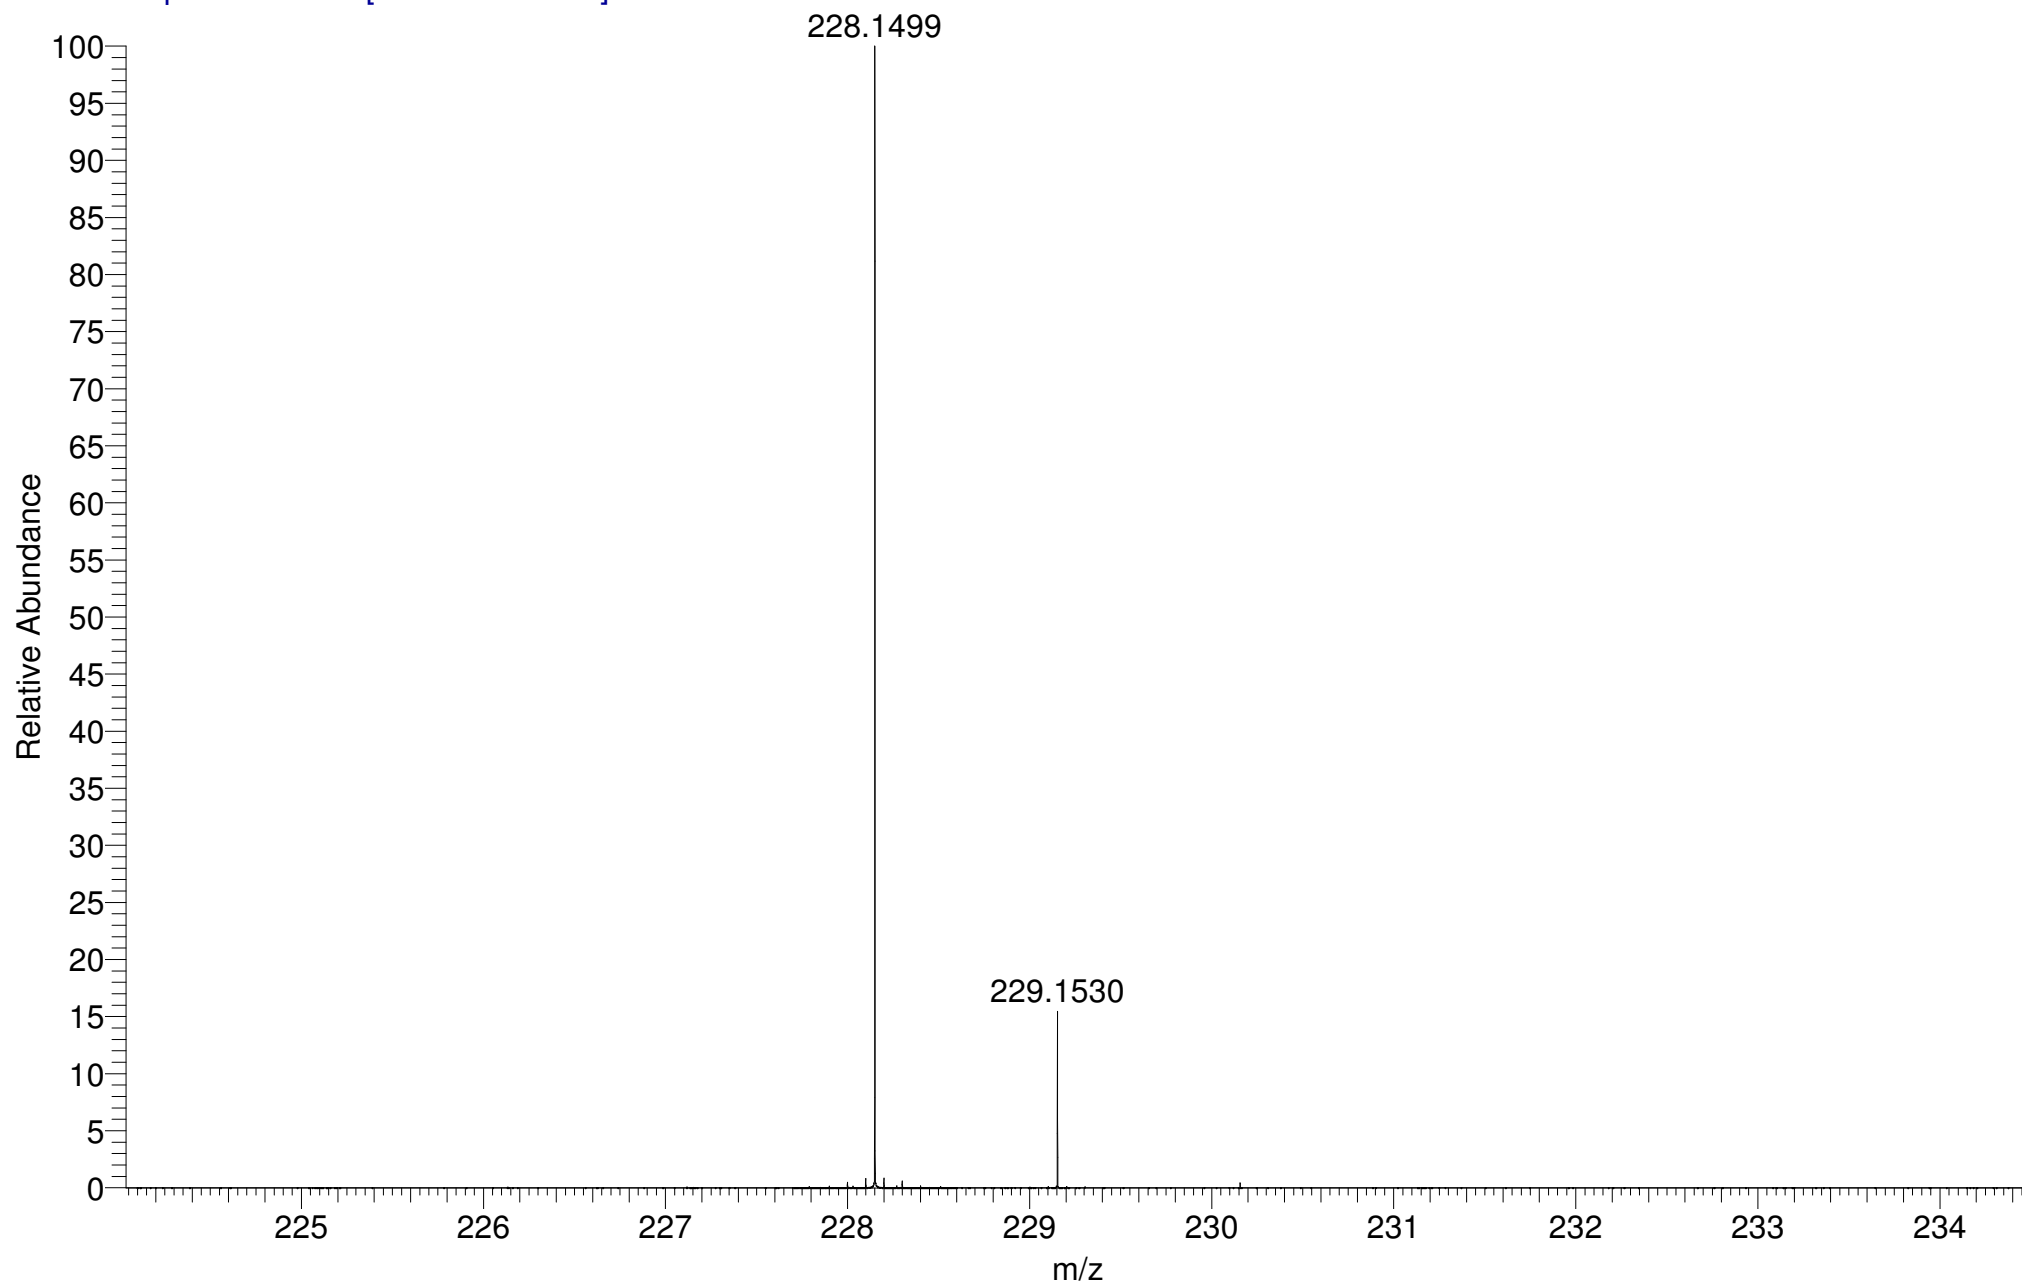

| Mass     | Theoretical<br>Mass | Delta<br>[ppm] | RDB | Composition                                    |
|----------|---------------------|----------------|-----|------------------------------------------------|
| 228.1499 | 228.1495            | 1.6            | 7.5 | C <sub>14</sub> H <sub>18</sub> N <sub>3</sub> |
|          | 228.1509            | -4.2           | 7.0 | C <sub>16</sub> H <sub>20</sub> O <sub>1</sub> |

AET7-76 MW=287?  
(DCM)/MeOH + NH4OAc

# Compound 26

EPSRC National Centre Swansea  
LTQ Orbitrap XL

adam throup  
11/04/2012 12:20:42

BRASHE191-OJ-HNESP #28-32 RT: 0.75-0.88 AV: 5 SM: 7G NL: 2.03E5  
T: FTMS + p NSI Full ms [120.00-2000.00]

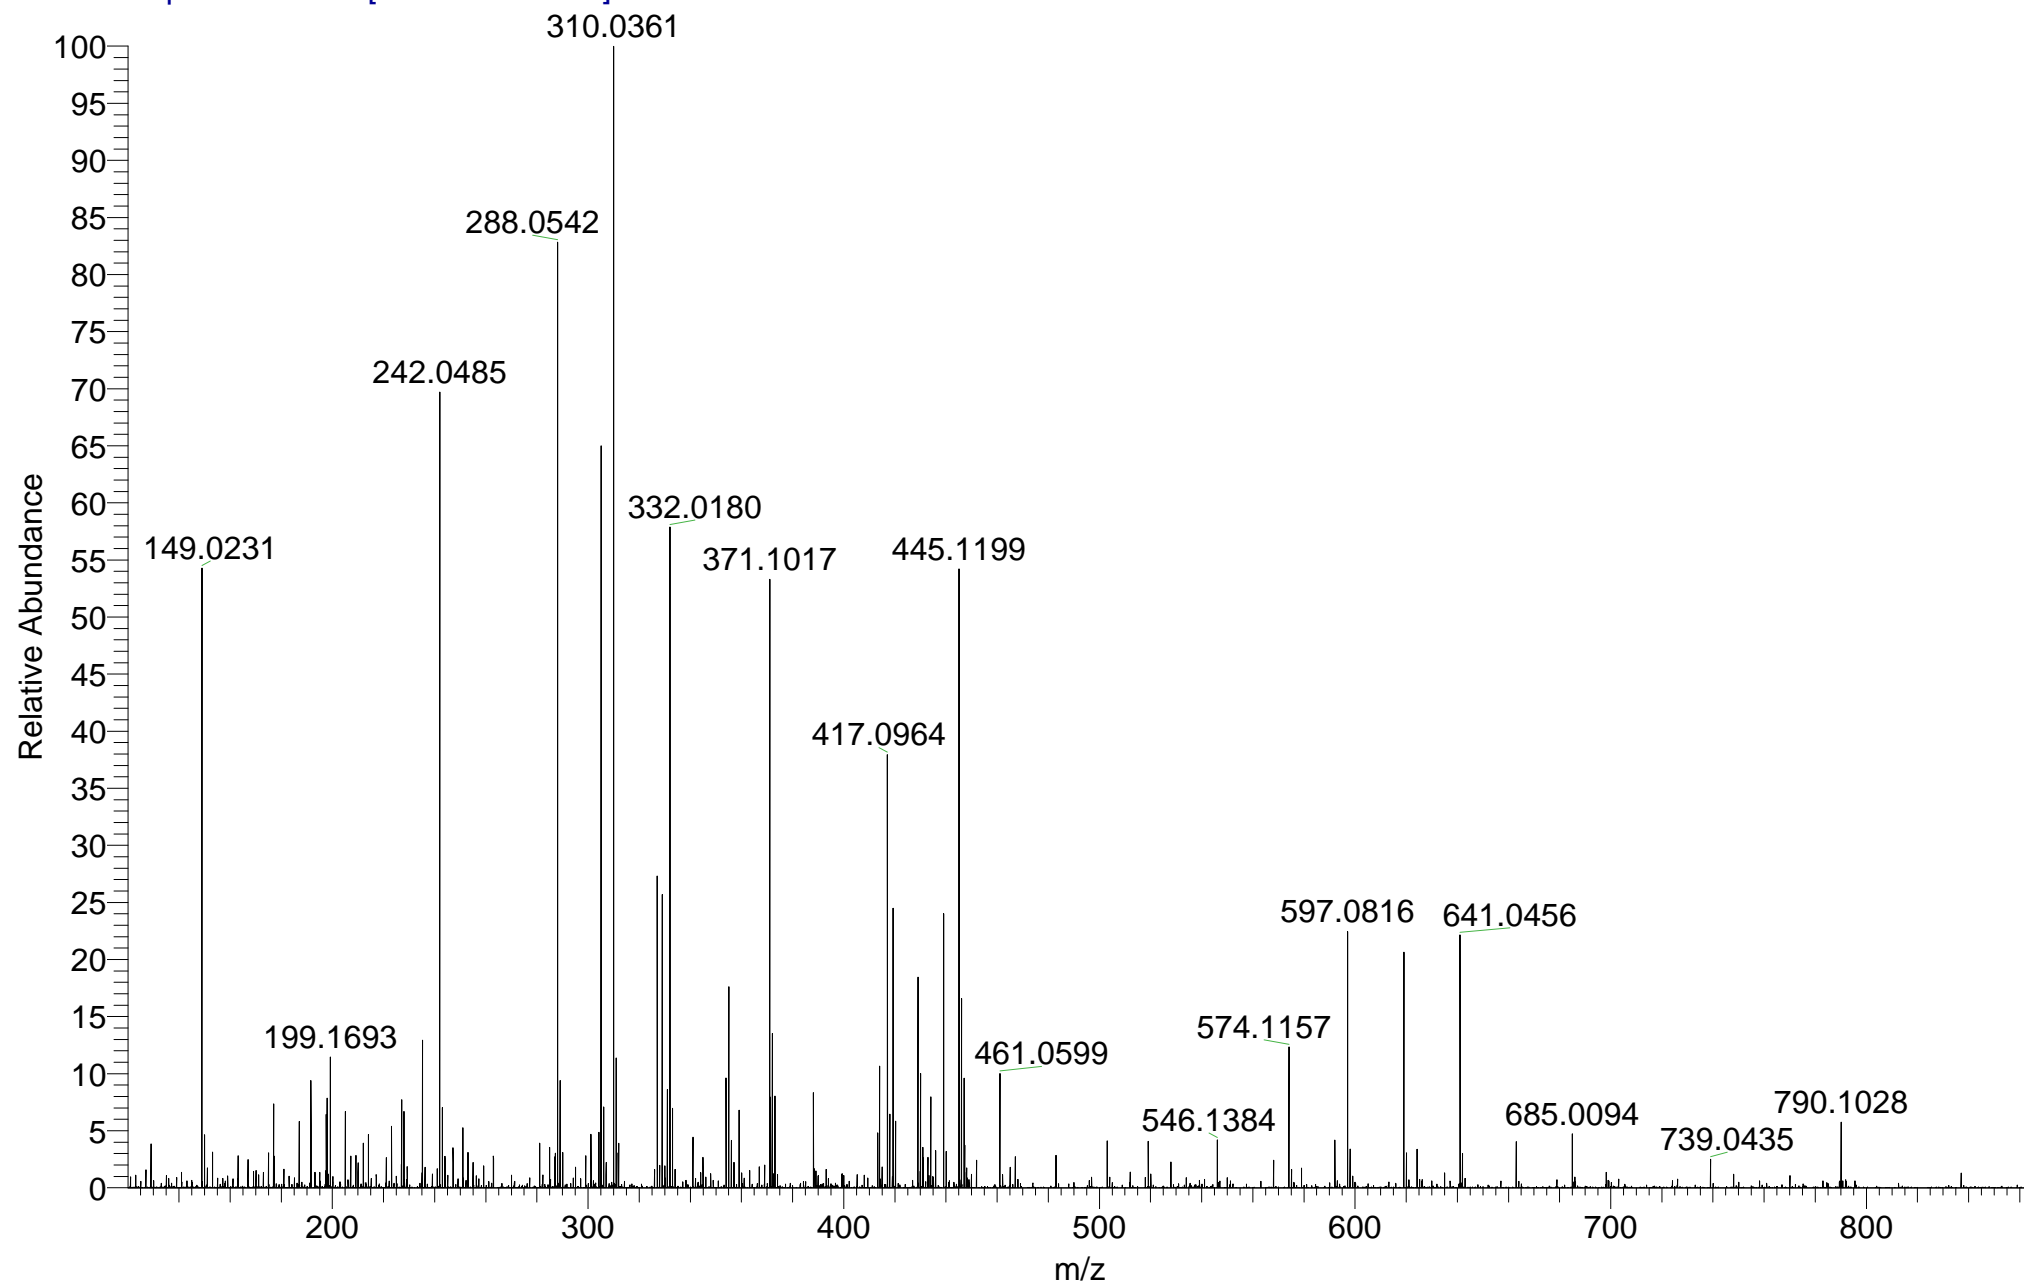

SM: 7G

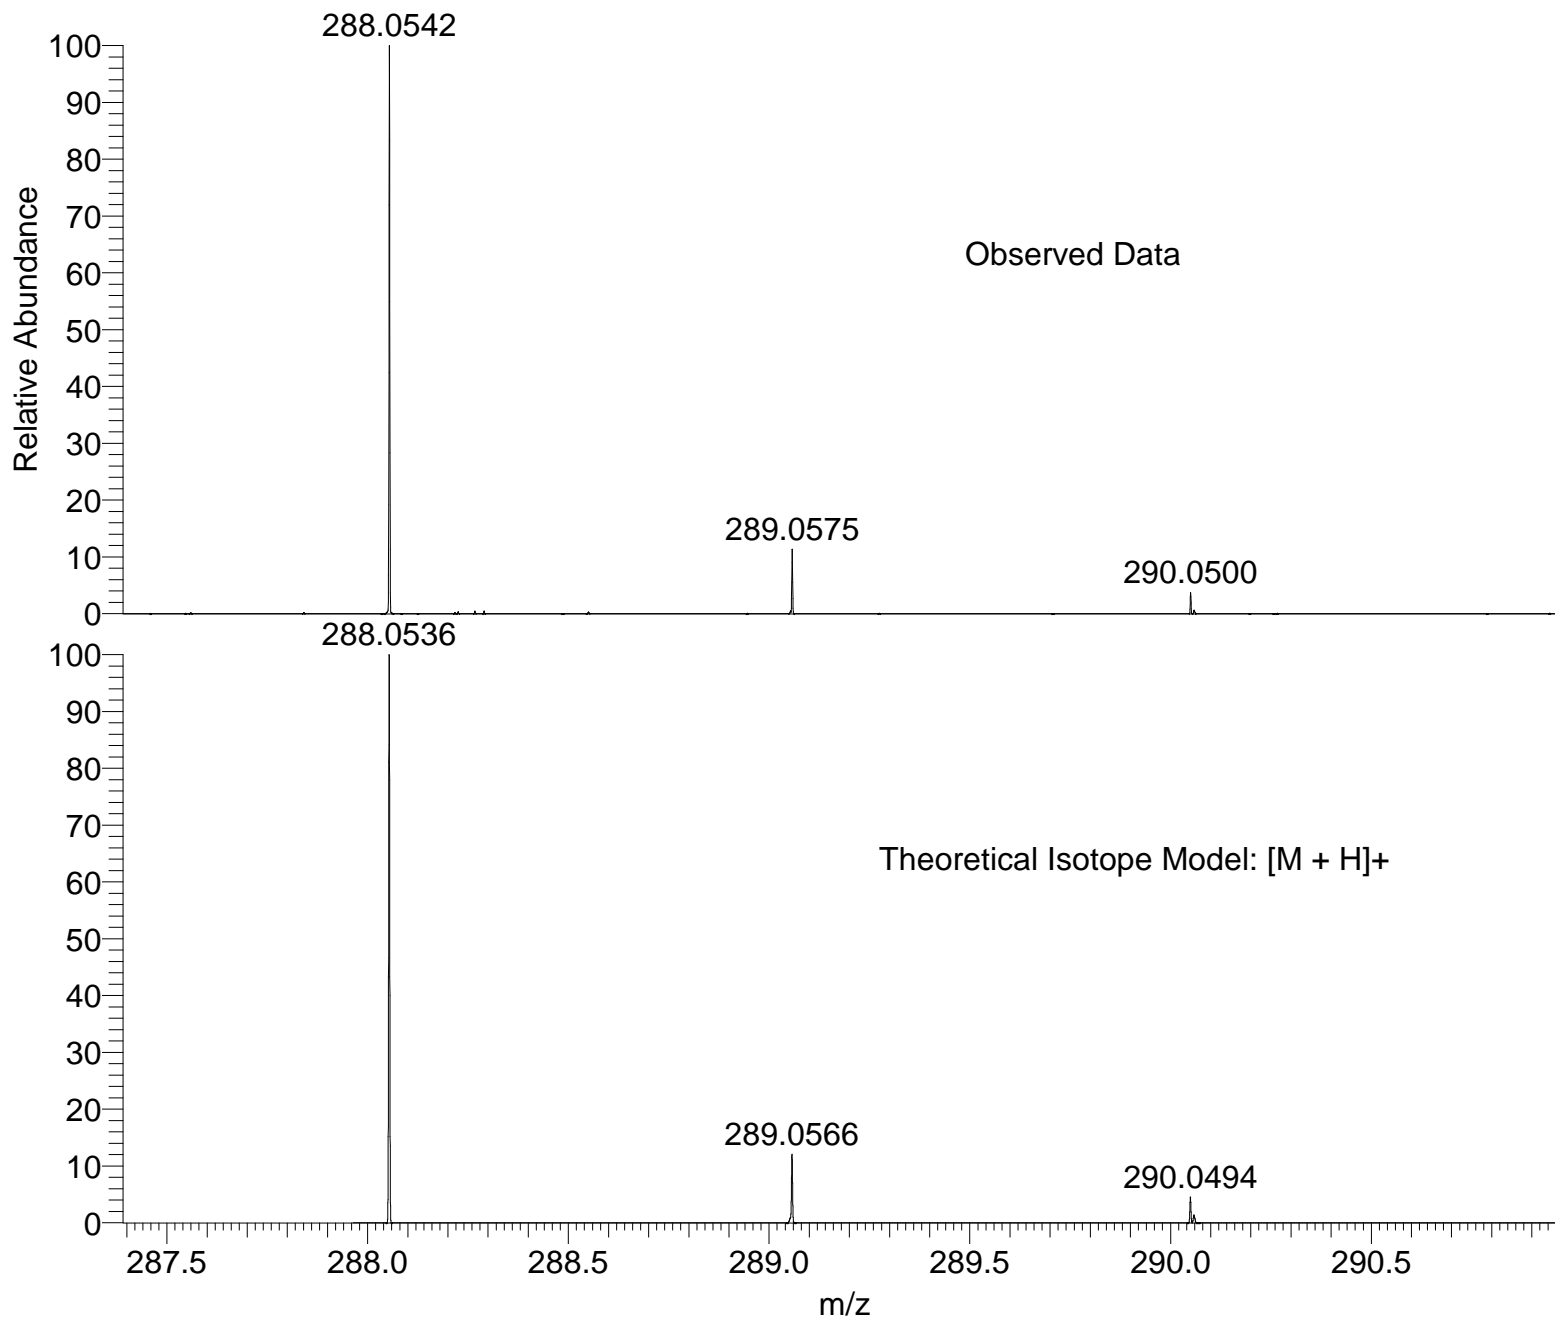

NL:  
1.68E5  
BRASHE191-OJ-HNESP#28-  
32 RT: 0.75-0.88 AV: 5 T:  
FTMS + p NSI Full ms  
[120.00-2000.00]

NL:  
1.94E4  
C<sub>11</sub>H<sub>13</sub>NO<sub>6</sub>SH:  
C<sub>11</sub>H<sub>14</sub>N<sub>1</sub>O<sub>6</sub>S<sub>1</sub>  
p (gss, s /p:40) Chrg 1  
R: 100000 Res .Pwr . @FWHM

Isotope:           Min. .. Max.  
 14 N               0....10  
 16 O               0....15  
 12 C               0....65  
 1 H                0....75  
 23 Na              0....0  
 32 S               0....2  
 Tolerance Window: +- 5.00 ppm  
 Db/Ring Equiv:    -3.. 100  
 Fits:              500

N-Rule: Do not use  
 Charge: 1

| Mass     | Theoretical<br>Mass | Delta<br>[ppm] | RDB  | Composition                                                                  |
|----------|---------------------|----------------|------|------------------------------------------------------------------------------|
| 288.0542 | 288.0543            | -0.4           | 1.5  | C <sub>4</sub> H <sub>14</sub> O <sub>4</sub> N <sub>7</sub> S <sub>2</sub>  |
|          | 288.0536            | 2.0            | 5.5  | C <sub>11</sub> H <sub>14</sub> O <sub>6</sub> N <sub>1</sub> S <sub>1</sub> |
|          | 288.0536            | 2.0            | 11.0 | C <sub>10</sub> H <sub>8</sub> O <sub>1</sub> N <sub>8</sub> S <sub>1</sub>  |
|          | 288.0548            | -2.1           | 2.0  | C <sub>5</sub> H <sub>12</sub> O <sub>10</sub> N <sub>4</sub>                |
|          | 288.0535            | 2.6            | -3.0 | C <sub>4</sub> H <sub>16</sub> O <sub>14</sub>                               |
|          | 288.0535            | 2.6            | 2.5  | C <sub>3</sub> H <sub>10</sub> O <sub>9</sub> N <sub>7</sub>                 |
|          | 288.0550            | -2.7           | 10.5 | C <sub>12</sub> H <sub>10</sub> O <sub>2</sub> N <sub>5</sub> S <sub>1</sub> |
|          | 288.0530            | 4.2            | 2.0  | C <sub>2</sub> H <sub>12</sub> O <sub>3</sub> N <sub>10</sub> S <sub>2</sub> |
|          | 288.0529            | 4.4            | 15.0 | C <sub>17</sub> H <sub>8</sub> O <sub>3</sub> N <sub>2</sub>                 |
|          | 288.0556            | -4.9           | 19.5 | C <sub>20</sub> H <sub>6</sub> N <sub>3</sub>                                |

# Compound 28

AET7-77-2 MW=497?  
(DCM)/MeOH + NH<sub>4</sub>OAc

EPSRC National Centre Swansea  
LTQ Orbitrap XL

adam throup  
11/04/2012 12:31:00

BRASHE194-OJ-HNESP #32-34 RT: 0.83-0.89 AV: 3 SM: 7G NL: 1.61E5  
T: FTMS + p NSI Full ms [120.00-2000.00]

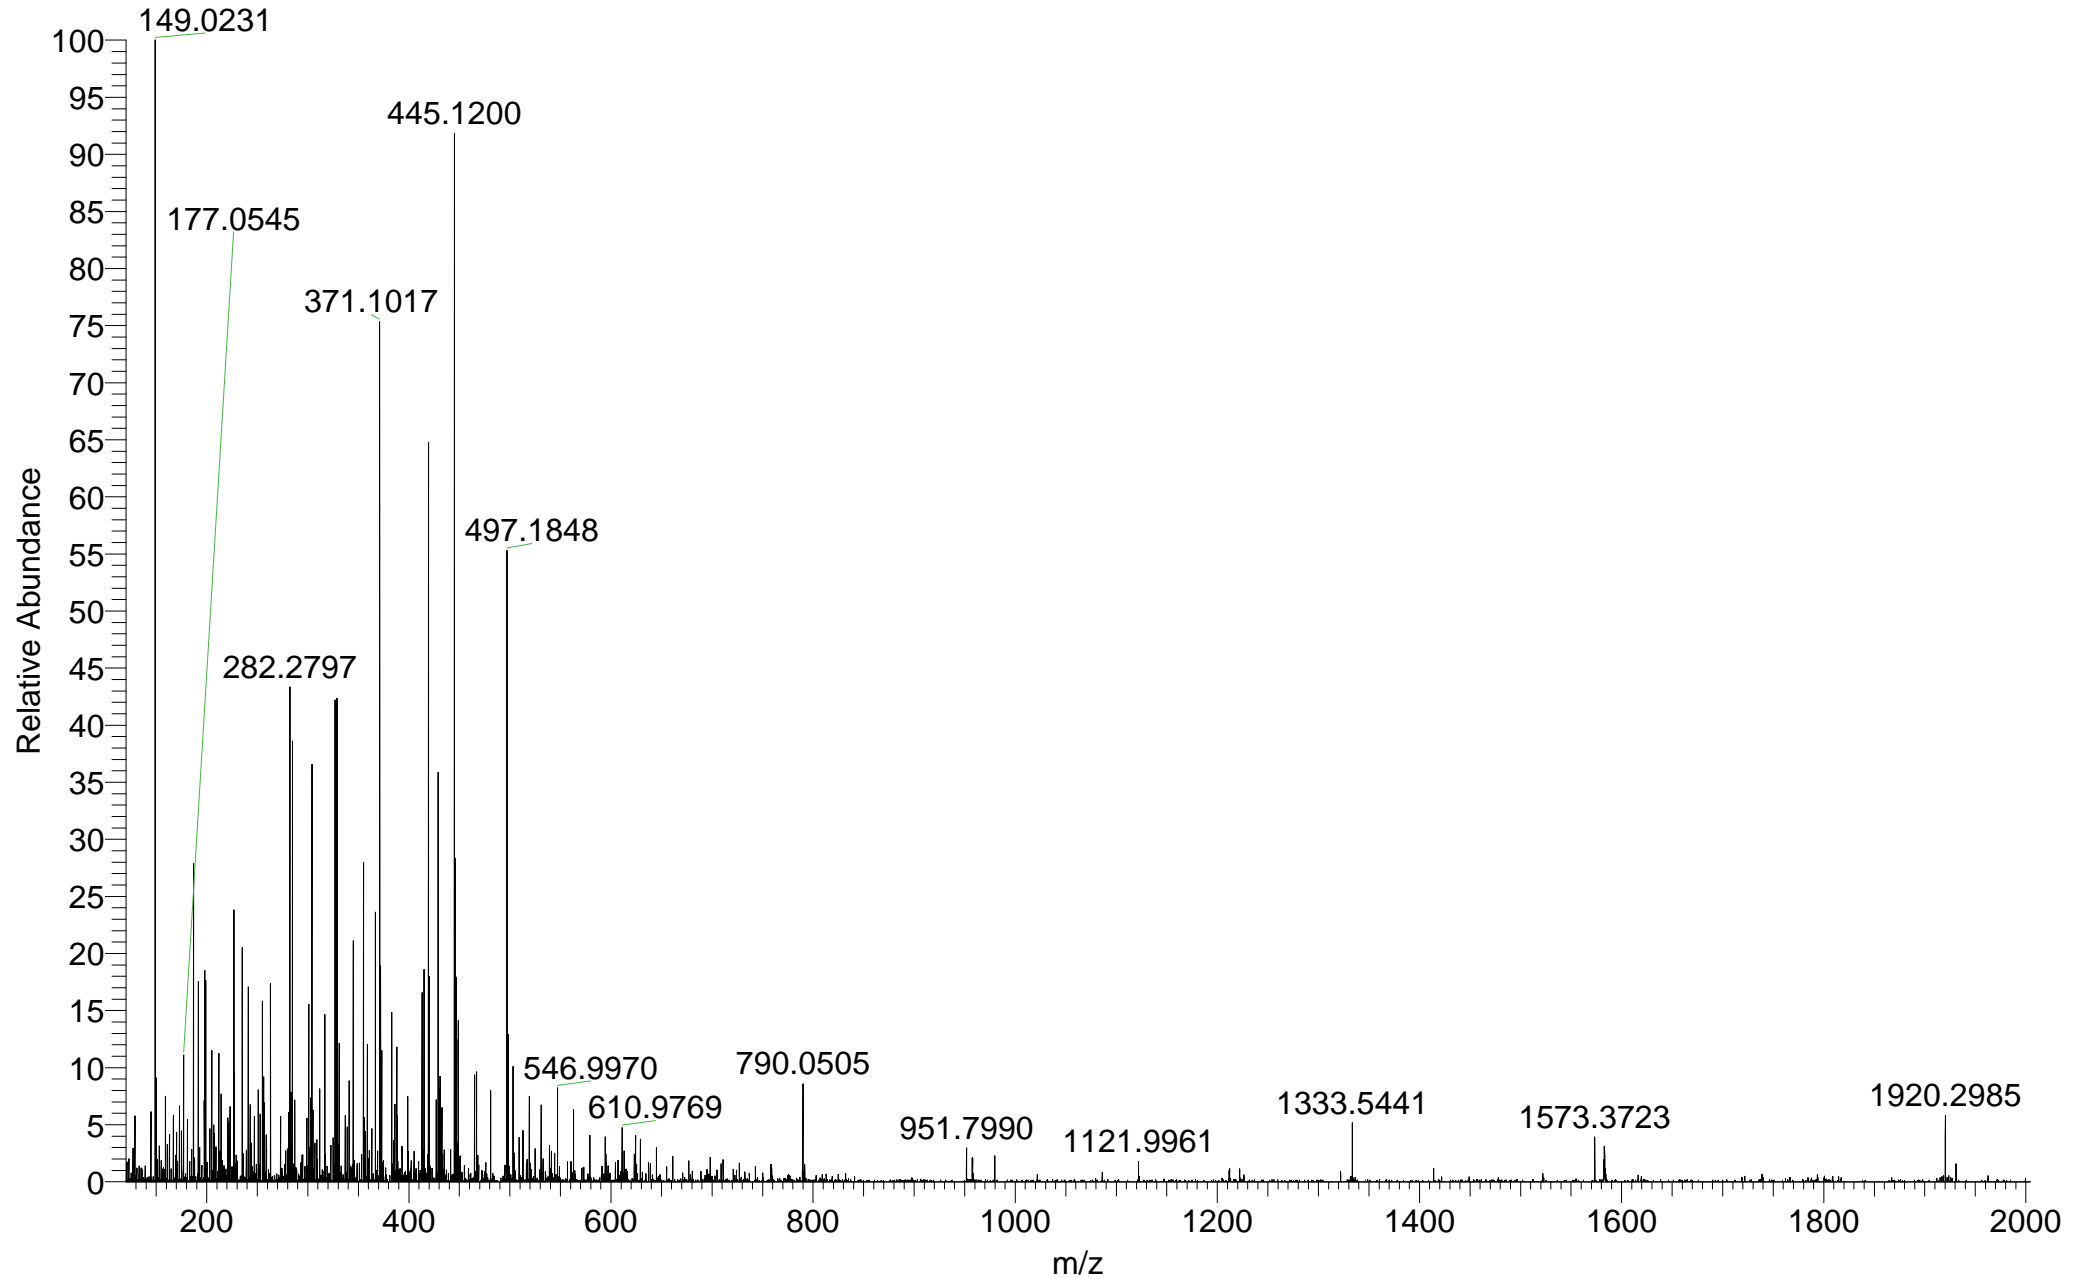

SM: 7G

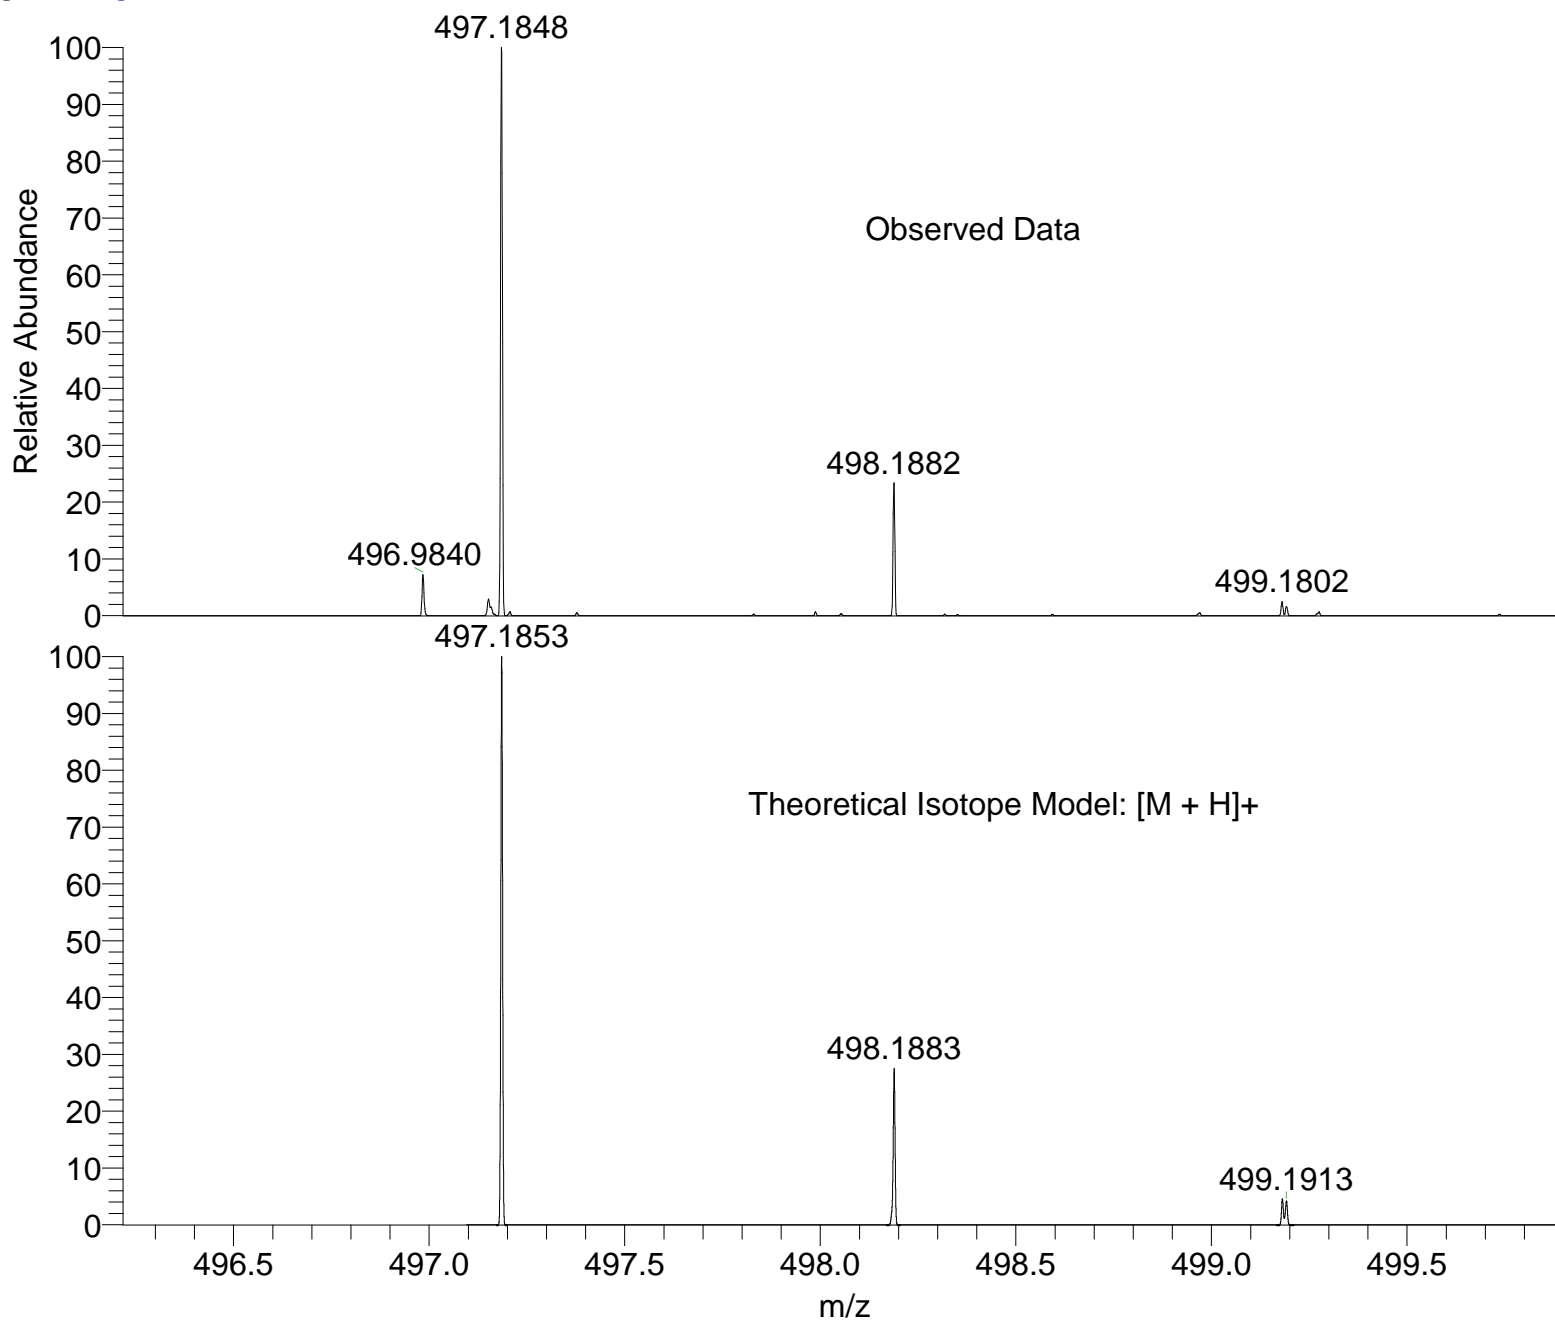

NL:  
8.92E4  
BRASHE194-OJ-HNESP#32-  
34 RT: 0.83-0.89 AV: 3 T:  
FTMS + p NSI Full ms  
[120.00-2000.00]

NL:  
1.65E4  
C<sub>25</sub> H<sub>28</sub> N<sub>4</sub> O<sub>5</sub> SH:  
C<sub>25</sub> H<sub>29</sub> N<sub>4</sub> O<sub>5</sub> S<sub>1</sub>  
p (gss, s /p:40) Chrg 1  
R: 100000 Res .Pwr . @FWHM

Isotope:           Min. .. Max.  
 14 N               0....10  
 16 O               0....15  
 12 C               0....65  
 1 H                0....75  
 23 Na              0....0  
 32 S               0....2  
 Tolerance Window: +- 5.00 ppm  
 Db/Ring Equiv:   -3.. 100  
 Fits:              500

N-Rule: Do not use  
 Charge: 1

| Mass     | Theoretical<br>Mass | Delta<br>[ppm] | RDB  | Composition                                                                   |
|----------|---------------------|----------------|------|-------------------------------------------------------------------------------|
| 497.1848 | 497.1847            | 0.3            | 4.5  | C <sub>17</sub> H <sub>33</sub> O <sub>7</sub> N <sub>6</sub> S <sub>2</sub>  |
|          | 497.1846            | 0.3            | 23.0 | C <sub>31</sub> H <sub>23</sub> O <sub>2</sub> N <sub>5</sub>                 |
|          | 497.1851            | -0.7           | 10.5 | C <sub>17</sub> H <sub>25</sub> O <sub>8</sub> N <sub>10</sub>                |
|          | 497.1851            | -0.7           | 5.0  | C <sub>18</sub> H <sub>31</sub> O <sub>13</sub> N <sub>3</sub>                |
|          | 497.1853            | -1.0           | 13.5 | C <sub>25</sub> H <sub>29</sub> O <sub>5</sub> N <sub>4</sub> S <sub>1</sub>  |
|          | 497.1842            | 1.3            | 17.0 | C <sub>31</sub> H <sub>31</sub> O <sub>1</sub> N <sub>1</sub> S <sub>2</sub>  |
|          | 497.1840            | 1.6            | 8.5  | C <sub>24</sub> H <sub>33</sub> O <sub>9</sub> S <sub>1</sub>                 |
|          | 497.1840            | 1.7            | 14.0 | C <sub>23</sub> H <sub>27</sub> O <sub>4</sub> N <sub>7</sub> S <sub>1</sub>  |
|          | 497.1838            | 2.0            | 5.5  | C <sub>16</sub> H <sub>29</sub> O <sub>12</sub> N <sub>6</sub>                |
|          | 497.1858            | -2.1           | 1.0  | C <sub>11</sub> H <sub>31</sub> O <sub>11</sub> N <sub>9</sub> S <sub>1</sub> |
|          | 497.1860            | -2.4           | 22.5 | C <sub>33</sub> H <sub>25</sub> O <sub>3</sub> N <sub>2</sub>                 |
|          | 497.1860            | -2.4           | 9.5  | C <sub>18</sub> H <sub>29</sub> O <sub>3</sub> N <sub>10</sub> S <sub>2</sub> |
|          | 497.1860            | -2.4           | 4.0  | C <sub>19</sub> H <sub>35</sub> O <sub>8</sub> N <sub>3</sub> S <sub>2</sub>  |
|          | 497.1833            | 3.0            | -0.5 | C <sub>16</sub> H <sub>37</sub> O <sub>11</sub> N <sub>2</sub> S <sub>2</sub> |
|          | 497.1833            | 3.0            | 5.0  | C <sub>15</sub> H <sub>31</sub> O <sub>6</sub> N <sub>9</sub> S <sub>2</sub>  |
|          | 497.1833            | 3.0            | 18.0 | C <sub>30</sub> H <sub>27</sub> O <sub>6</sub> N <sub>1</sub>                 |
|          | 497.1833            | 3.0            | 23.5 | C <sub>29</sub> H <sub>21</sub> O <sub>1</sub> N <sub>8</sub>                 |
|          | 497.1865            | -3.4           | 10.0 | C <sub>19</sub> H <sub>27</sub> O <sub>9</sub> N <sub>7</sub>                 |
|          | 497.1865            | -3.4           | 4.5  | C <sub>20</sub> H <sub>33</sub> O <sub>14</sub>                               |
|          | 497.1867            | -3.7           | 18.5 | C <sub>26</sub> H <sub>25</sub> O <sub>1</sub> N <sub>8</sub> S <sub>1</sub>  |
|          | 497.1867            | -3.7           | 13.0 | C <sub>27</sub> H <sub>31</sub> O <sub>6</sub> N <sub>1</sub> S <sub>1</sub>  |
|          | 497.1828            | 4.0            | 17.5 | C <sub>29</sub> H <sub>29</sub> N <sub>4</sub> S <sub>2</sub>                 |
|          | 497.1826            | 4.4            | 9.0  | C <sub>22</sub> H <sub>31</sub> O <sub>8</sub> N <sub>3</sub> S <sub>1</sub>  |
|          | 497.1826            | 4.4            | 14.5 | C <sub>21</sub> H <sub>25</sub> O <sub>3</sub> N <sub>10</sub> S <sub>1</sub> |
|          | 497.1825            | 4.7            | 6.0  | C <sub>14</sub> H <sub>27</sub> O <sub>11</sub> N <sub>9</sub>                |
|          | 497.1872            | -4.8           | 0.5  | C <sub>13</sub> H <sub>33</sub> O <sub>12</sub> N <sub>6</sub> S <sub>1</sub> |



# Compound 29

AET7-78-2 MW=538?  
(DCM)/MeOH + NH<sub>4</sub>OAc

EPSRC National Centre Swansea  
LTQ Orbitrap XL

adam throup  
11/04/2012 12:27:35

BRASHE193-OJ-HNESP #31-38 RT: 0.81-1.02 AV: 8 SM: 7G NL: 1.33E6  
T: FTMS + p NSI Full ms [120.00-2000.00]

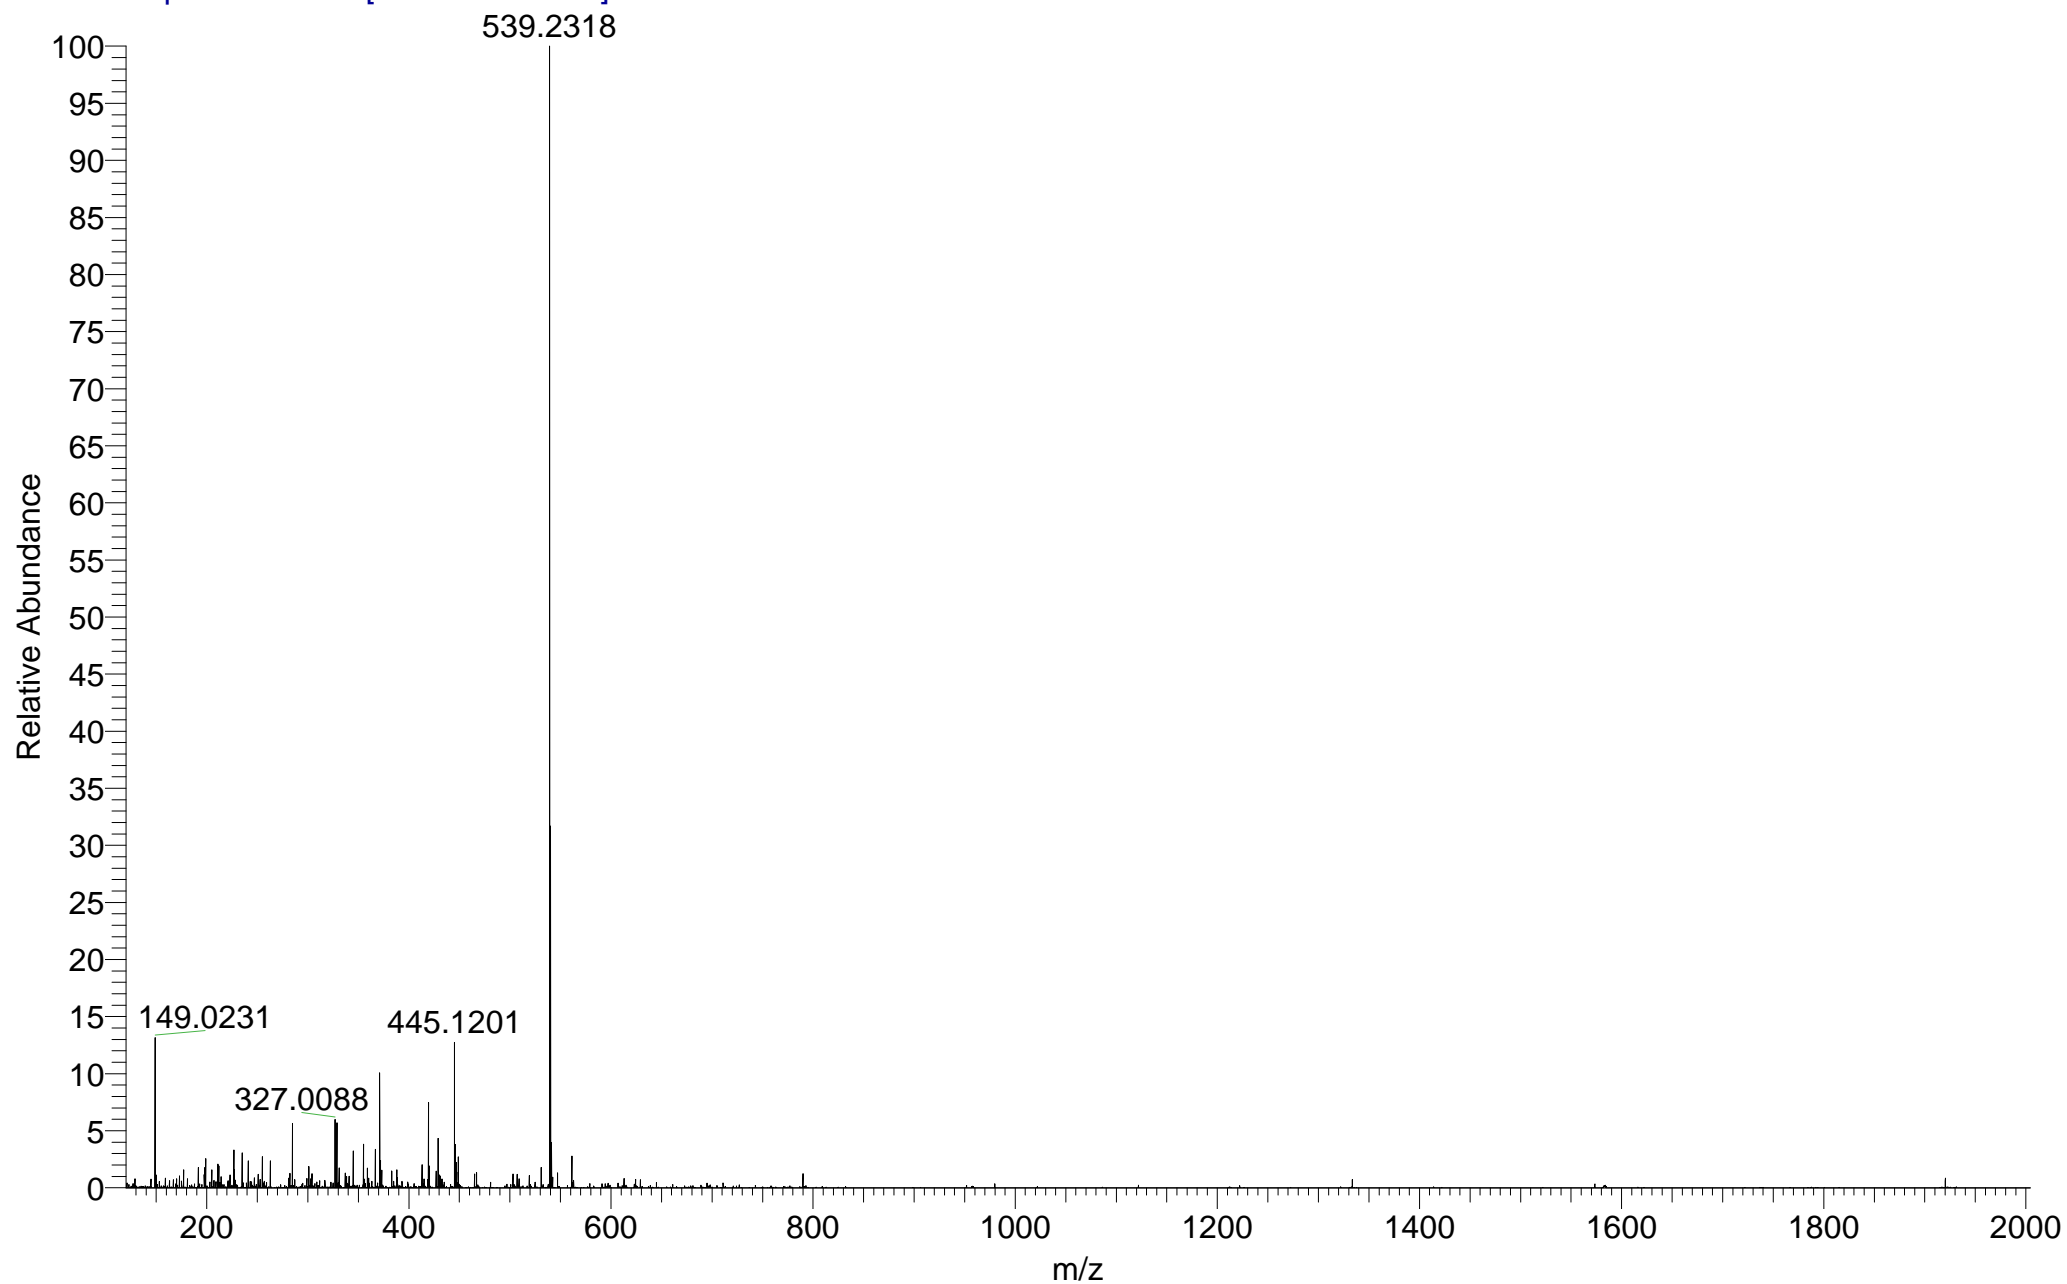

SM: 7G

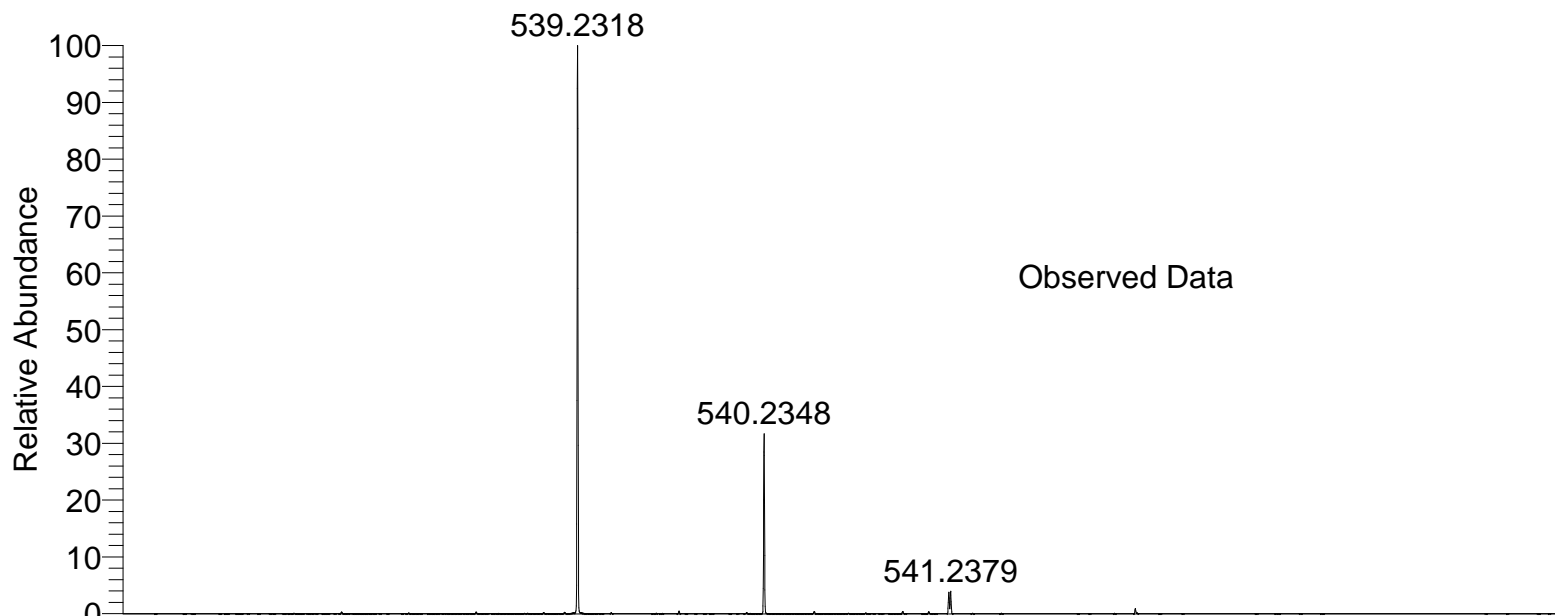

NL:  
1.33E6  
BRASHE193-OJ-HNESP#31-  
38 RT: 0.81-1.02 AV: 8 T:  
FTMS + p NSI Full ms  
[120.00-2000.00]

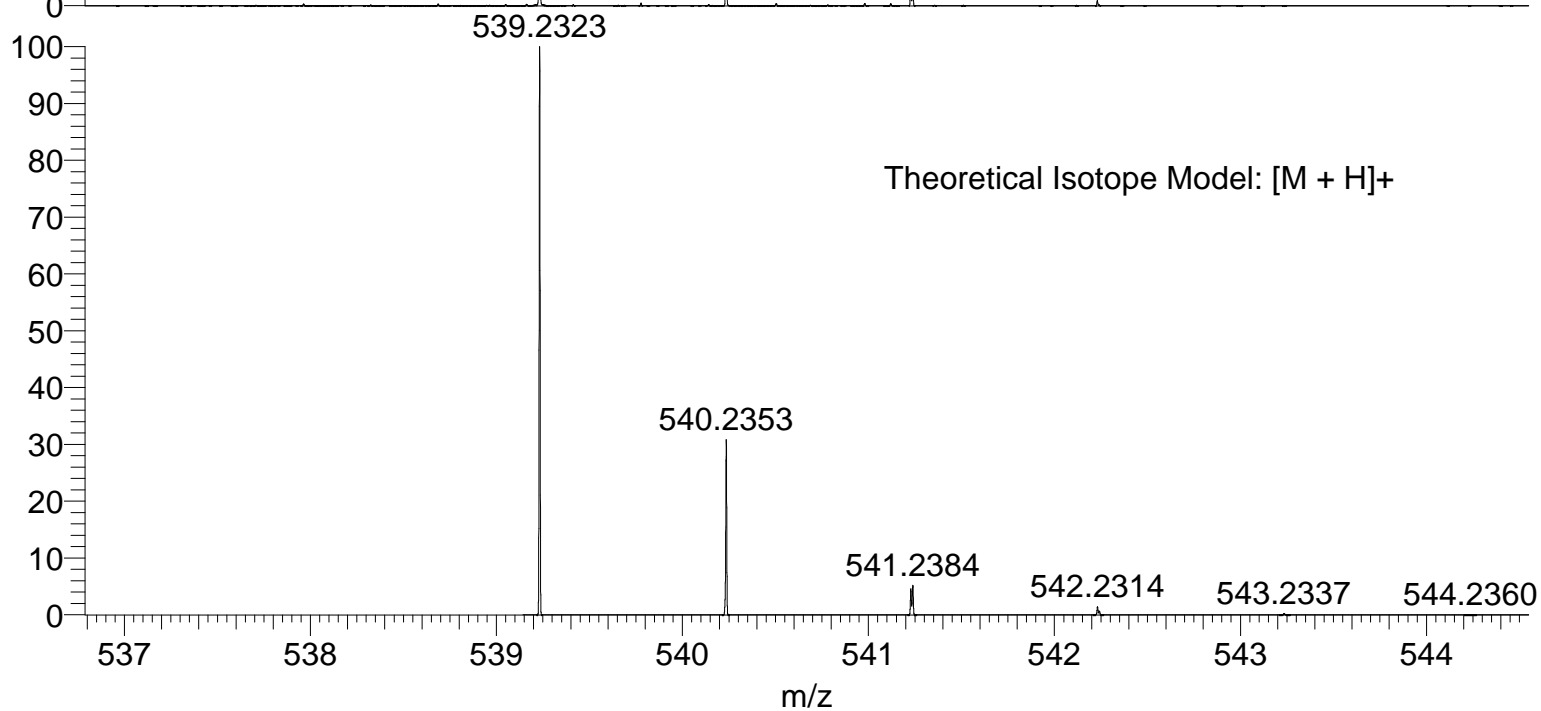

NL:  
1.60E4  
C<sub>28</sub> H<sub>34</sub> N<sub>4</sub> O<sub>5</sub> SH:  
C<sub>28</sub> H<sub>35</sub> N<sub>4</sub> O<sub>5</sub> S<sub>1</sub>  
p (gss, s /p:40) Chrg 1  
R: 100000 Res .Pwr . @FWHM

Isotope:           Min. .. Max.  
 14 N               0....10  
 16 O               0....15  
 12 C               0....65  
 1 H                0....75  
 23 Na              0....0  
 32 S               0....2  
 Tolerance Window: +- 5.00 ppm  
 Db/Ring Equiv:    -3.. 100  
 Fits:              500

N-Rule: Do not use  
 Charge: 1

| Mass     | Theoretical<br>Mass | Delta<br>[ppm] | RDB  | Composition                                                                   |
|----------|---------------------|----------------|------|-------------------------------------------------------------------------------|
| 539.2318 | 539.2316            | 0.3            | 4.5  | C <sub>20</sub> H <sub>39</sub> O <sub>7</sub> N <sub>6</sub> S <sub>2</sub>  |
|          | 539.2316            | 0.4            | 23.0 | C <sub>34</sub> H <sub>29</sub> O <sub>2</sub> N <sub>5</sub>                 |
|          | 539.2321            | -0.5           | 10.5 | C <sub>20</sub> H <sub>31</sub> O <sub>8</sub> N <sub>10</sub>                |
|          | 539.2321            | -0.5           | 5.0  | C <sub>21</sub> H <sub>37</sub> O <sub>13</sub> N <sub>3</sub>                |
|          | 539.2323            | -0.9           | 13.5 | C <sub>28</sub> H <sub>35</sub> O <sub>5</sub> N <sub>4</sub> S <sub>1</sub>  |
|          | 539.2311            | 1.3            | 17.0 | C <sub>34</sub> H <sub>37</sub> O <sub>1</sub> N <sub>1</sub> S <sub>2</sub>  |
|          | 539.2309            | 1.6            | 8.5  | C <sub>27</sub> H <sub>39</sub> O <sub>9</sub> S <sub>1</sub>                 |
|          | 539.2309            | 1.6            | 14.0 | C <sub>26</sub> H <sub>33</sub> O <sub>4</sub> N <sub>7</sub> S <sub>1</sub>  |
|          | 539.2328            | -1.8           | 1.0  | C <sub>14</sub> H <sub>37</sub> O <sub>11</sub> N <sub>9</sub> S <sub>1</sub> |
|          | 539.2307            | 2.0            | 5.5  | C <sub>19</sub> H <sub>35</sub> O <sub>12</sub> N <sub>6</sub>                |
|          | 539.2329            | -2.1           | 22.5 | C <sub>36</sub> H <sub>31</sub> O <sub>3</sub> N <sub>2</sub>                 |
|          | 539.2330            | -2.1           | 9.5  | C <sub>21</sub> H <sub>35</sub> O <sub>3</sub> N <sub>10</sub> S <sub>2</sub> |
|          | 539.2330            | -2.1           | 4.0  | C <sub>22</sub> H <sub>41</sub> O <sub>8</sub> N <sub>3</sub> S <sub>2</sub>  |
|          | 539.2303            | 2.8            | -0.5 | C <sub>19</sub> H <sub>43</sub> O <sub>11</sub> N <sub>2</sub> S <sub>2</sub> |
|          | 539.2303            | 2.8            | 5.0  | C <sub>18</sub> H <sub>37</sub> O <sub>6</sub> N <sub>9</sub> S <sub>2</sub>  |
|          | 539.2302            | 2.9            | 18.0 | C <sub>33</sub> H <sub>33</sub> O <sub>6</sub> N <sub>1</sub>                 |
|          | 539.2302            | 2.9            | 23.5 | C <sub>32</sub> H <sub>27</sub> O <sub>1</sub> N <sub>8</sub>                 |
|          | 539.2334            | -3.0           | 10.0 | C <sub>22</sub> H <sub>33</sub> O <sub>9</sub> N <sub>7</sub>                 |
|          | 539.2334            | -3.0           | 4.5  | C <sub>23</sub> H <sub>39</sub> O <sub>14</sub>                               |
|          | 539.2336            | -3.3           | 18.5 | C <sub>29</sub> H <sub>31</sub> O <sub>1</sub> N <sub>8</sub> S <sub>1</sub>  |
|          | 539.2336            | -3.4           | 13.0 | C <sub>30</sub> H <sub>37</sub> O <sub>6</sub> N <sub>1</sub> S <sub>1</sub>  |
|          | 539.2298            | 3.8            | 17.5 | C <sub>32</sub> H <sub>35</sub> N <sub>4</sub> S <sub>2</sub>                 |
|          | 539.2296            | 4.1            | 9.0  | C <sub>25</sub> H <sub>37</sub> O <sub>8</sub> N <sub>3</sub> S <sub>1</sub>  |
|          | 539.2296            | 4.1            | 14.5 | C <sub>24</sub> H <sub>31</sub> O <sub>3</sub> N <sub>10</sub> S <sub>1</sub> |
|          | 539.2341            | -4.3           | 0.5  | C <sub>16</sub> H <sub>39</sub> O <sub>12</sub> N <sub>6</sub> S <sub>1</sub> |
|          | 539.2294            | 4.4            | 6.0  | C <sub>17</sub> H <sub>33</sub> O <sub>11</sub> N <sub>9</sub>                |
|          | 539.2343            | -4.6           | 9.0  | C <sub>23</sub> H <sub>37</sub> O <sub>4</sub> N <sub>7</sub> S <sub>2</sub>  |
|          | 539.2343            | -4.6           | 3.5  | C <sub>24</sub> H <sub>43</sub> O <sub>9</sub> S <sub>2</sub>                 |

AET7-77-1 MW=464?  
(DCM)/MeOH + NH4OAc

# Compound 30

EPSRC National Centre Swansea  
LTQ Orbitrap XL

adam throup  
11/04/2012 12:24:09

BRASHE192-OJ-HNESP #32-36 RT: 0.84-0.96 AV: 5 SM: 7G NL: 1.90E6  
T: FTMS + p NSI Full ms [120.00-2000.00]

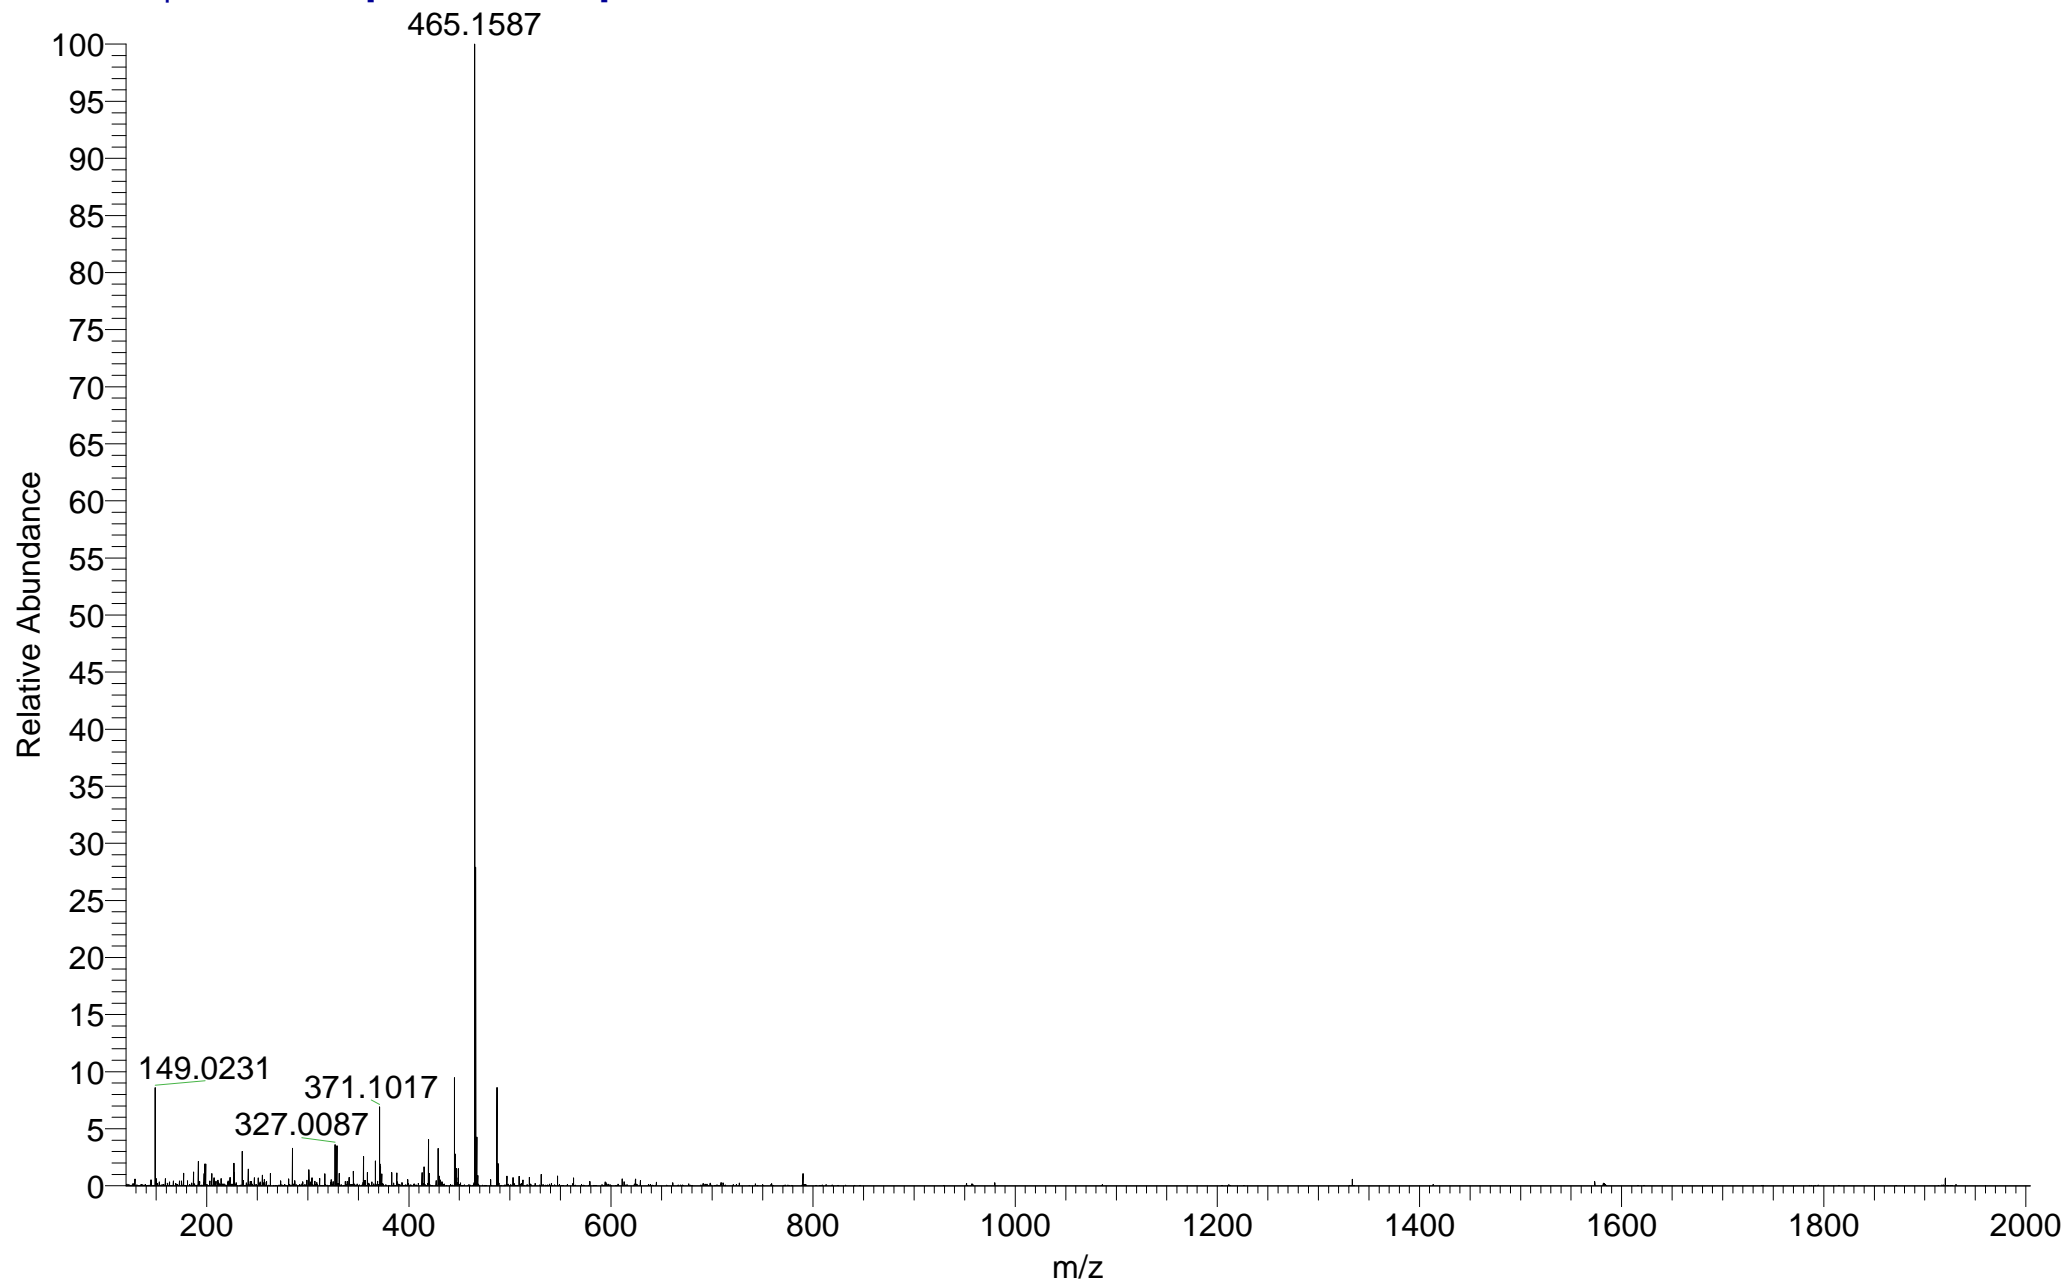

SM: 7G

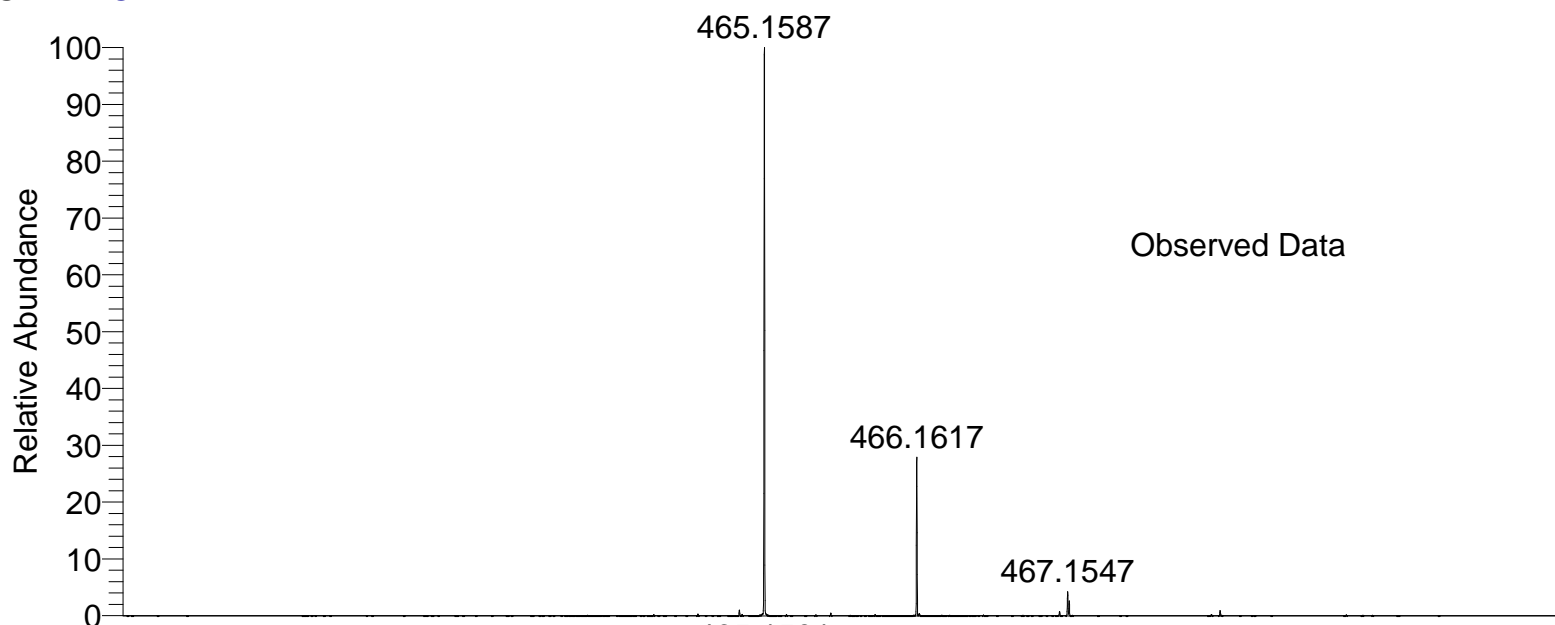

NL:  
1.90E6  
BRASHE192-OJ-HNESP#32-  
36 RT: 0.84-0.96 AV: 5 T:  
FTMS + p NSI Full ms  
[120.00-2000.00]

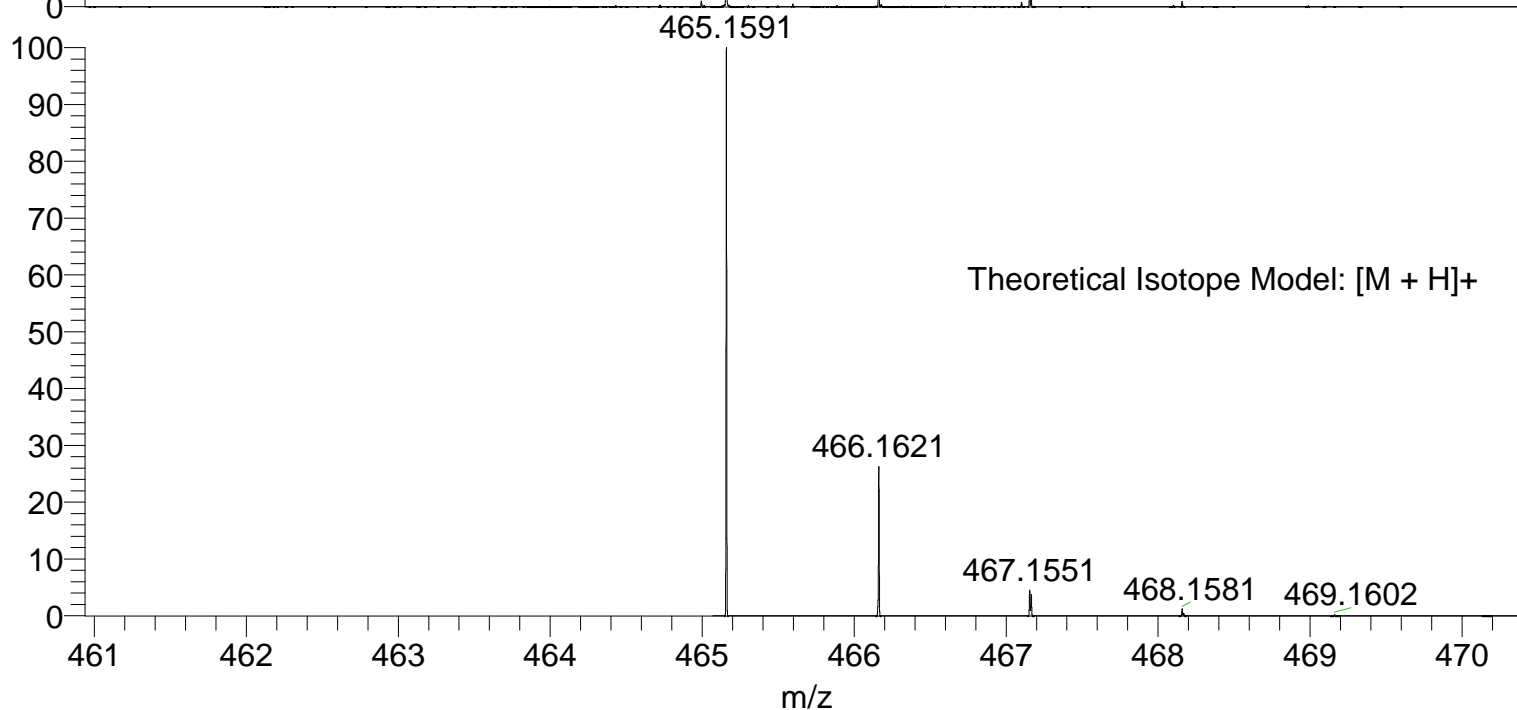

NL:  
1.67E4  
C<sub>24</sub> H<sub>24</sub> N<sub>4</sub> O<sub>4</sub> SH:  
C<sub>24</sub> H<sub>25</sub> N<sub>4</sub> O<sub>4</sub> S<sub>1</sub>  
p (gss, s /p:40) Chrg 1  
R: 100000 Res .Pwr . @FWHM

Isotope:           Min. .. Max.  
 14 N               0....10  
 16 O               0....15  
 12 C               0....65  
 1 H                0....75  
 23 Na              0....0  
 32 S               0....2  
 Tolerance Window: +- 5.00 ppm  
 Db/Ring Equiv:   -3.. 100  
 Fits:              500

N-Rule: Do not use  
 Charge: 1

| Mass     | Theoretical<br>Mass | Delta<br>[ppm] | RDB  | Composition                                                                   |
|----------|---------------------|----------------|------|-------------------------------------------------------------------------------|
| 465.1587 | 465.1589            | -0.5           | 11.5 | C <sub>16</sub> H <sub>21</sub> O <sub>7</sub> N <sub>10</sub>                |
|          | 465.1589            | -0.5           | 6.0  | C <sub>17</sub> H <sub>27</sub> O <sub>12</sub> N <sub>3</sub>                |
|          | 465.1585            | 0.5            | 5.5  | C <sub>16</sub> H <sub>29</sub> O <sub>6</sub> N <sub>6</sub> S <sub>2</sub>  |
|          | 465.1584            | 0.6            | 24.0 | C <sub>30</sub> H <sub>19</sub> O <sub>1</sub> N <sub>5</sub>                 |
|          | 465.1591            | -0.9           | 14.5 | C <sub>24</sub> H <sub>25</sub> O <sub>4</sub> N <sub>4</sub> S <sub>1</sub>  |
|          | 465.1583            | 0.9            | -3.0 | C <sub>9</sub> H <sub>31</sub> O <sub>14</sub> N <sub>5</sub> S <sub>1</sub>  |
|          | 465.1579            | 1.6            | 18.0 | C <sub>30</sub> H <sub>27</sub> N <sub>1</sub> S <sub>2</sub>                 |
|          | 465.1596            | -2.0           | 2.0  | C <sub>10</sub> H <sub>27</sub> O <sub>10</sub> N <sub>9</sub> S <sub>1</sub> |
|          | 465.1578            | 2.0            | 9.5  | C <sub>23</sub> H <sub>29</sub> O <sub>8</sub> S <sub>1</sub>                 |
|          | 465.1578            | 2.0            | 15.0 | C <sub>22</sub> H <sub>23</sub> O <sub>3</sub> N <sub>7</sub> S <sub>1</sub>  |
|          | 465.1598            | -2.3           | 23.5 | C <sub>32</sub> H <sub>21</sub> O <sub>2</sub> N <sub>2</sub>                 |
|          | 465.1598            | -2.3           | 10.5 | C <sub>17</sub> H <sub>25</sub> O <sub>2</sub> N <sub>10</sub> S <sub>2</sub> |
|          | 465.1598            | -2.4           | 5.0  | C <sub>18</sub> H <sub>31</sub> O <sub>7</sub> N <sub>3</sub> S <sub>2</sub>  |
|          | 465.1576            | 2.4            | 6.5  | C <sub>15</sub> H <sub>25</sub> O <sub>11</sub> N <sub>6</sub>                |
|          | 465.1603            | -3.4           | 11.0 | C <sub>18</sub> H <sub>23</sub> O <sub>8</sub> N <sub>7</sub>                 |
|          | 465.1603            | -3.4           | 5.5  | C <sub>19</sub> H <sub>29</sub> O <sub>13</sub>                               |
|          | 465.1571            | 3.4            | 0.5  | C <sub>15</sub> H <sub>33</sub> O <sub>10</sub> N <sub>2</sub> S <sub>2</sub> |
|          | 465.1571            | 3.4            | 6.0  | C <sub>14</sub> H <sub>27</sub> O <sub>5</sub> N <sub>9</sub> S <sub>2</sub>  |
|          | 465.1571            | 3.5            | 19.0 | C <sub>29</sub> H <sub>23</sub> O <sub>5</sub> N <sub>1</sub>                 |
|          | 465.1571            | 3.5            | 24.5 | C <sub>28</sub> H <sub>17</sub> N <sub>8</sub>                                |
|          | 465.1604            | -3.7           | 19.5 | C <sub>25</sub> H <sub>21</sub> N <sub>8</sub> S <sub>1</sub>                 |
|          | 465.1604            | -3.8           | 14.0 | C <sub>26</sub> H <sub>27</sub> O <sub>5</sub> N <sub>1</sub> S <sub>1</sub>  |
|          | 465.1569            | 3.8            | -2.5 | C <sub>7</sub> H <sub>29</sub> O <sub>13</sub> N <sub>8</sub> S <sub>1</sub>  |
|          | 465.1610            | -4.8           | 1.5  | C <sub>12</sub> H <sub>29</sub> O <sub>11</sub> N <sub>6</sub> S <sub>1</sub> |
|          | 465.1564            | 4.9            | 10.0 | C <sub>21</sub> H <sub>27</sub> O <sub>7</sub> N <sub>3</sub> S <sub>1</sub>  |
|          | 465.1564            | 4.9            | 15.5 | C <sub>20</sub> H <sub>21</sub> O <sub>2</sub> N <sub>10</sub> S <sub>1</sub> |

AET7-78-1 MW=507?  
(DCM)/MeOH + NH4OAc

# Compound 31

EPSRC National Centre Swansea  
LTQ Orbitrap XL

adam throup  
11/04/2012 12:34:26

BRASHE195-OJ-HNESP #28-34 RT: 0.72-0.86 AV: 7 SM: 7G NL: 9.10E5  
T: FTMS + p NSI Full ms [120.00-2000.00]

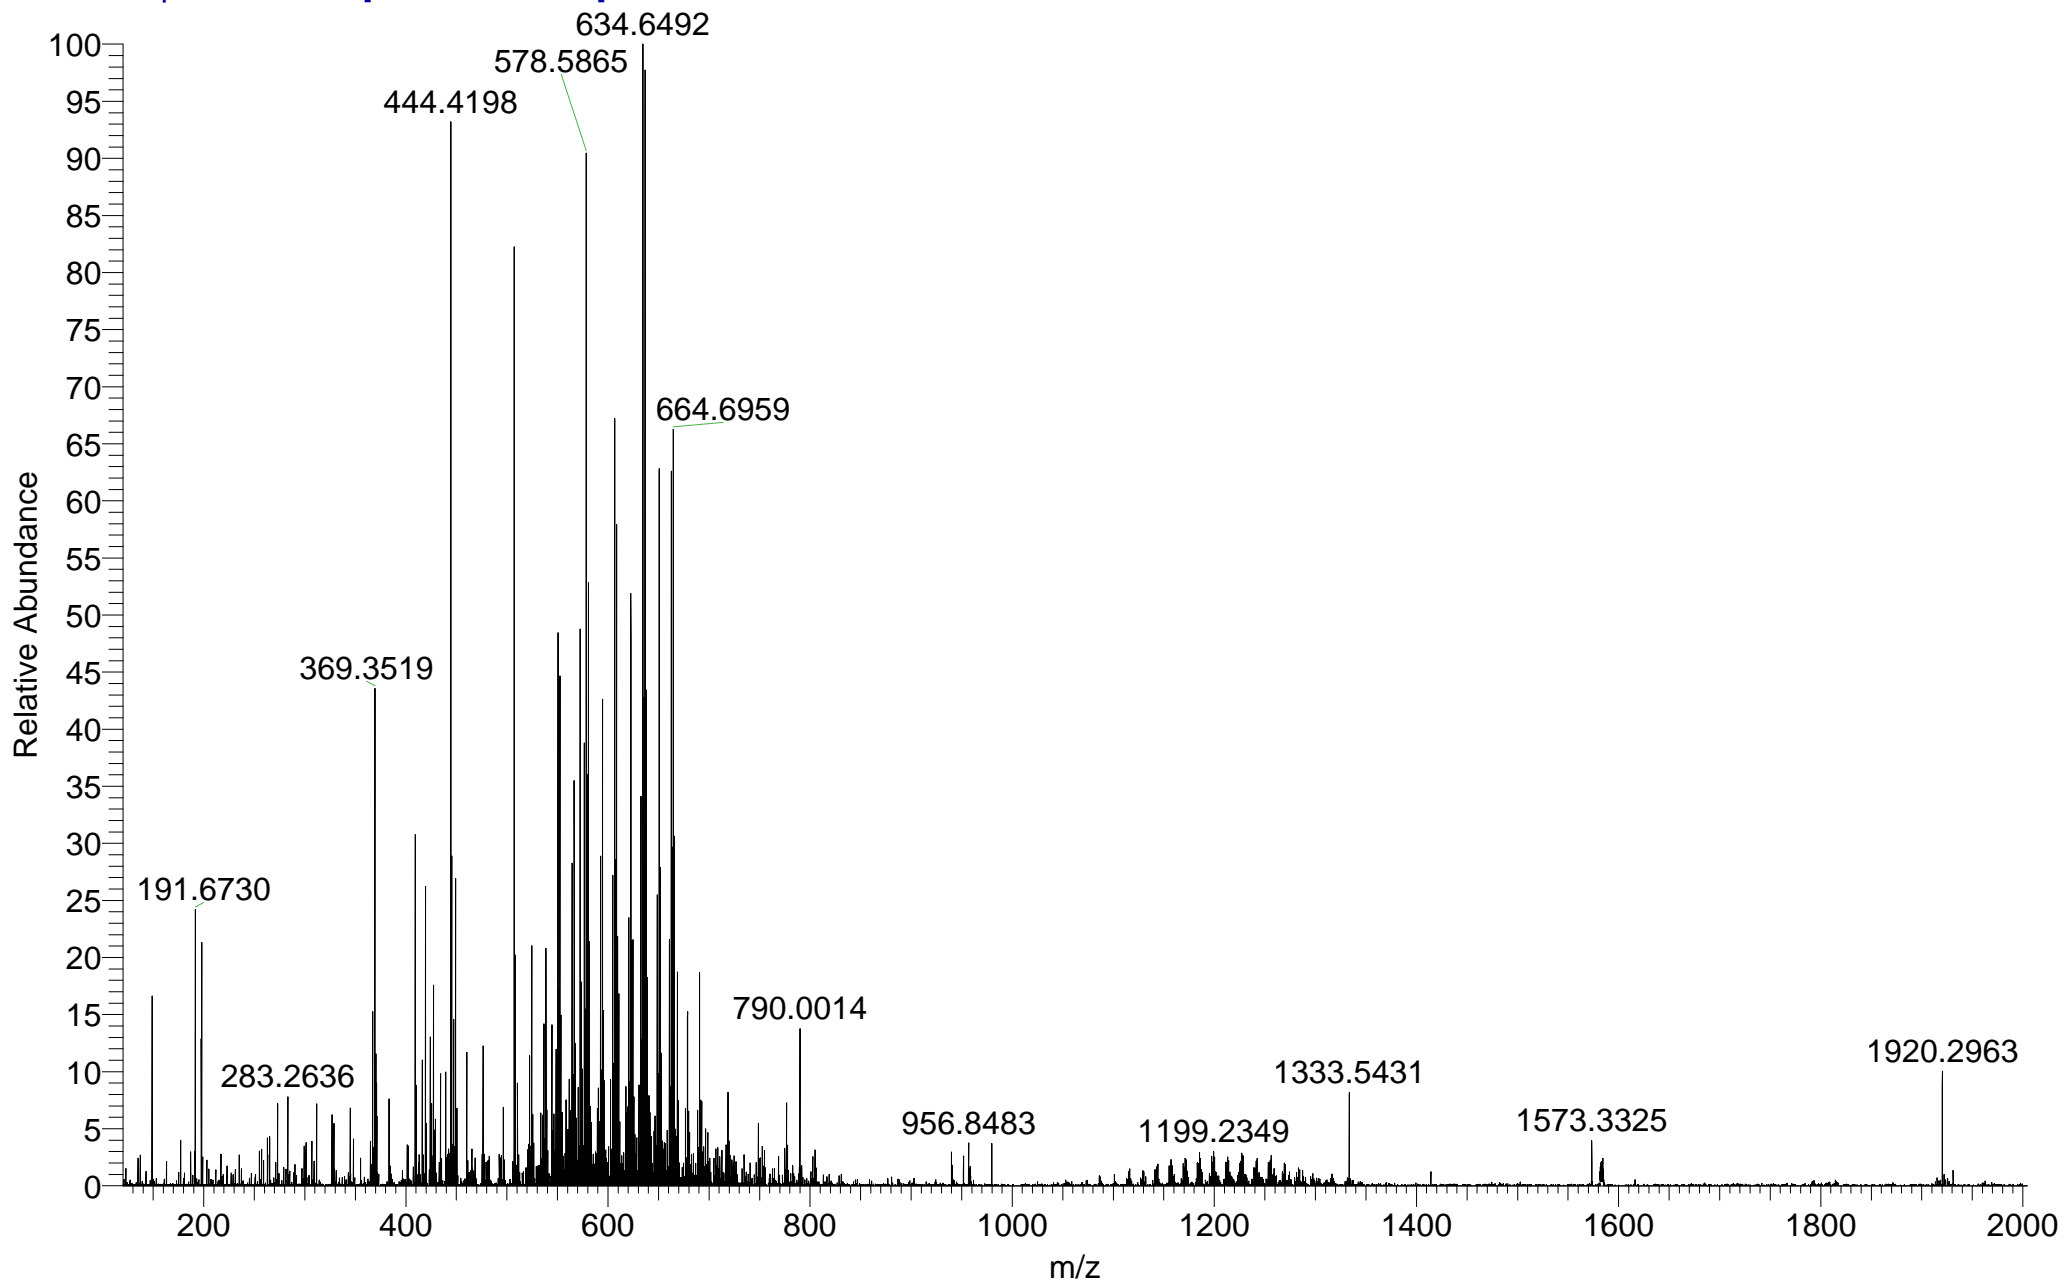

BRASHE195-OJ-HNESP #28-34 RT: 0.72-0.86 AV: 7 SM: 7G NL: 9.10E5  
T: FTMS + p NSI Full ms [120.00-2000.00]

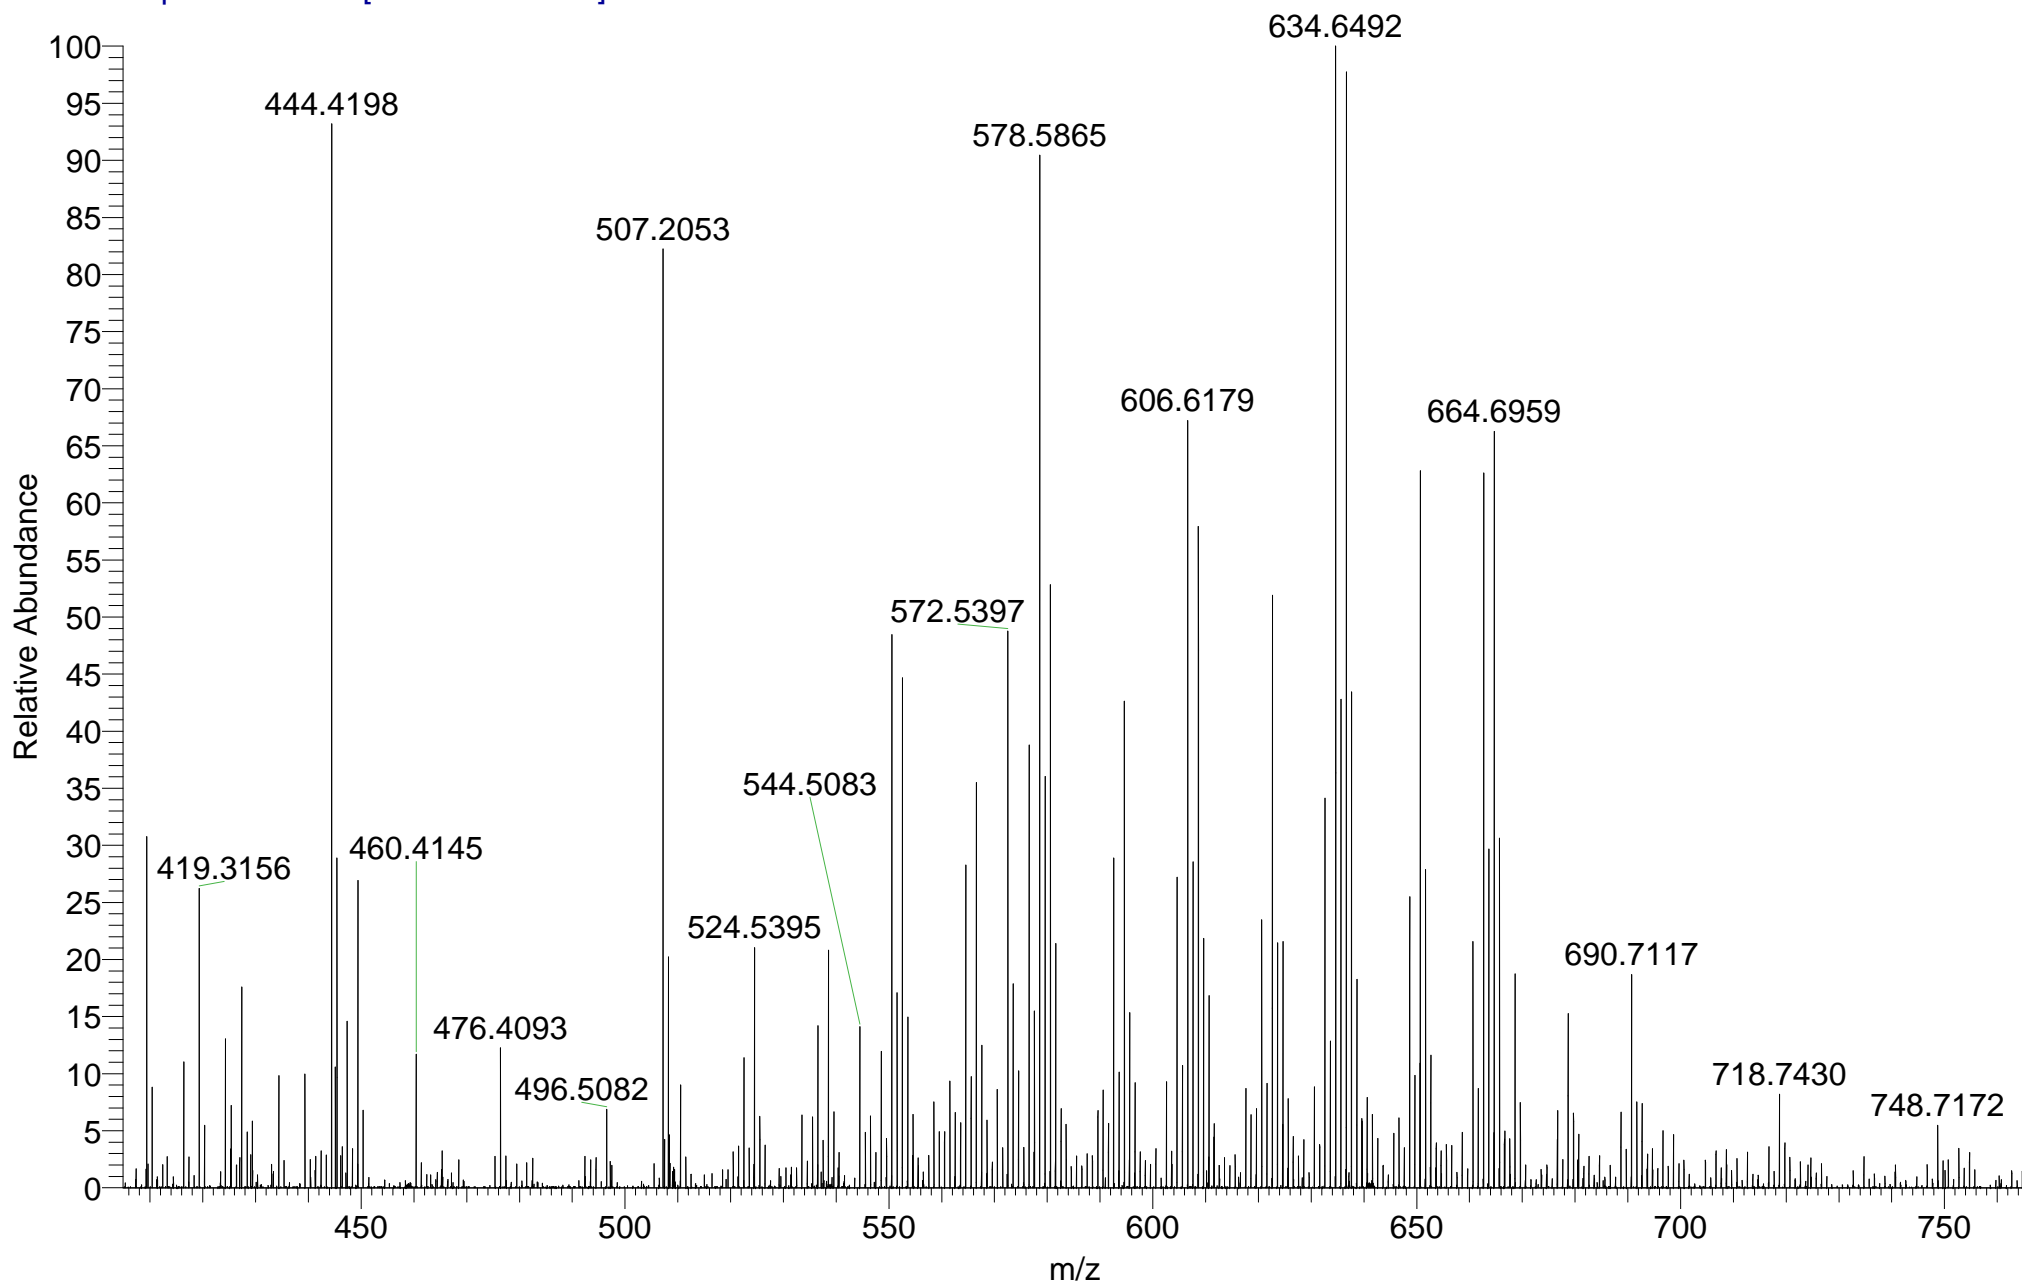



SM: 7G

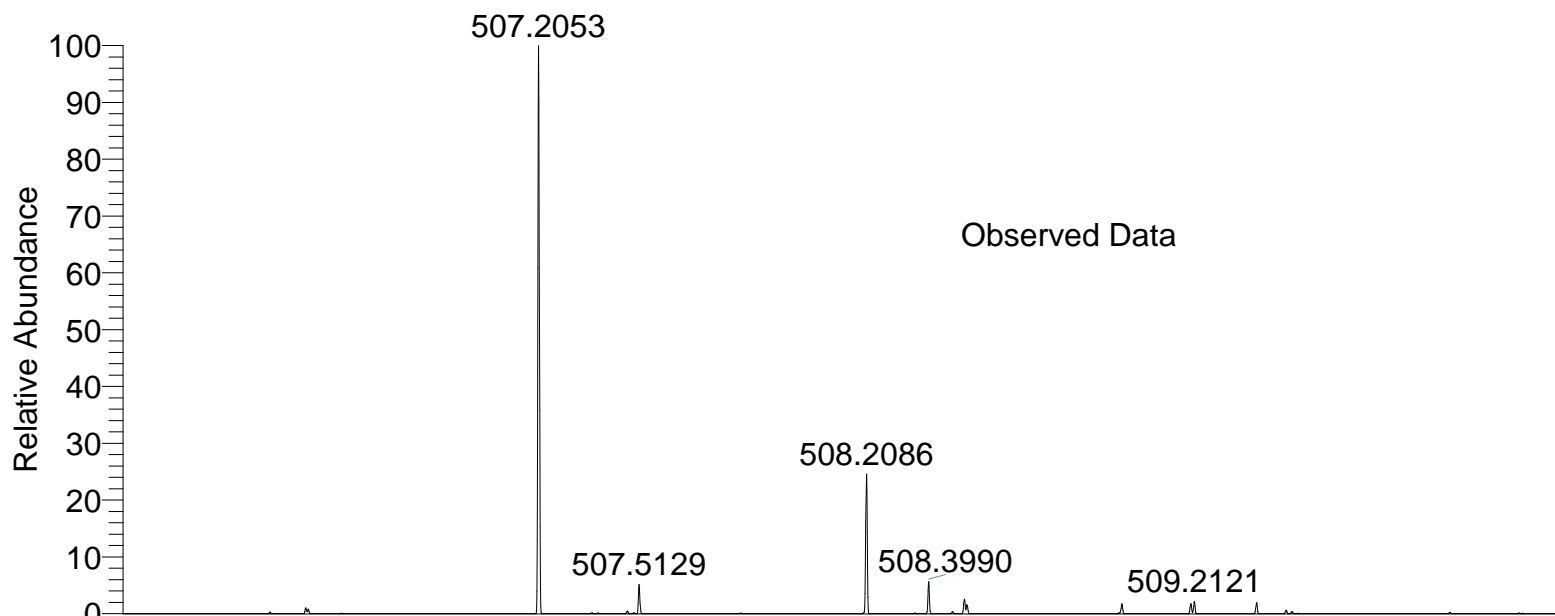

NL:  
7.48E5  
BRASHE195-OJ-HNESP#28-  
34 RT: 0.72-0.86 AV: 7 T:  
FTMS + p NSI Full ms  
[120.00-2000.00]

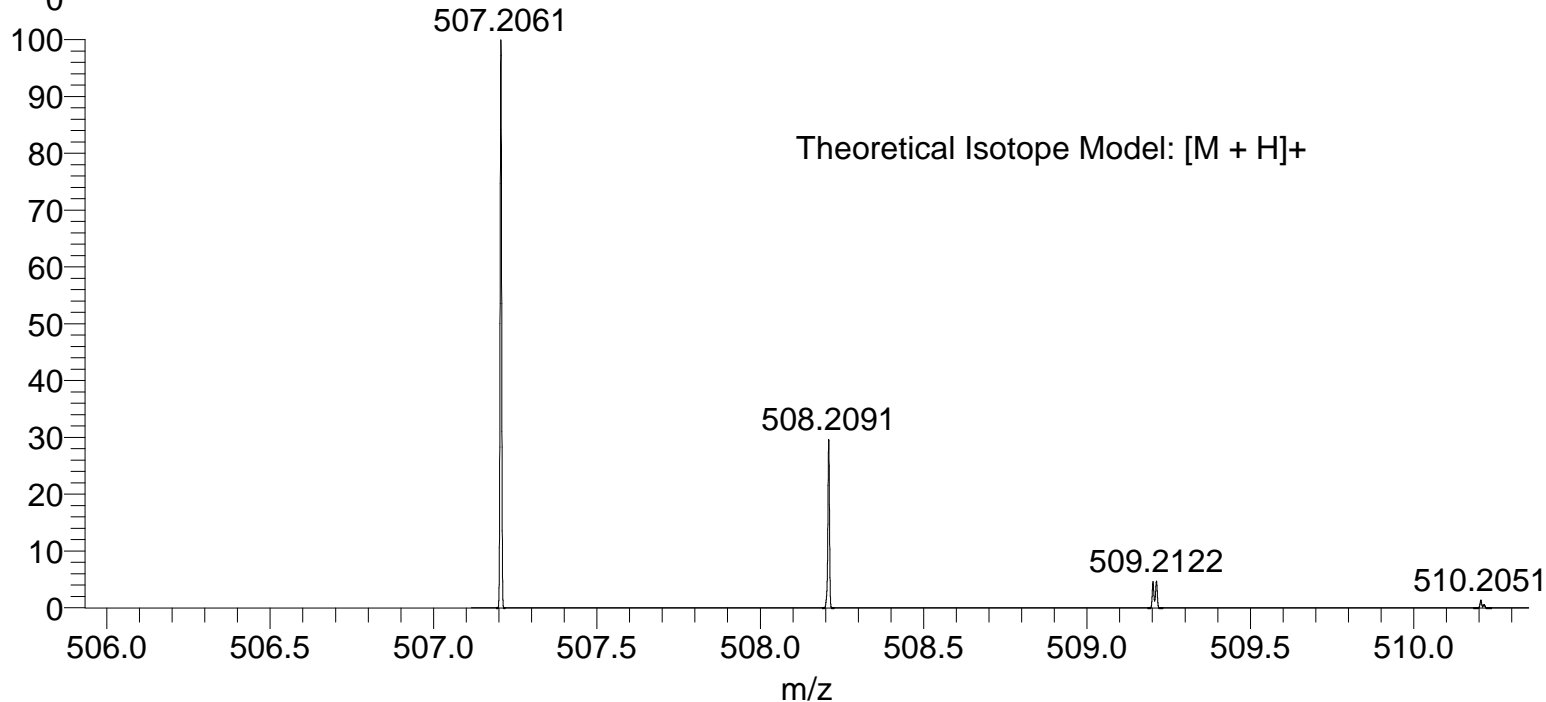

NL:  
1.62E4  
C<sub>27</sub> H<sub>30</sub> N<sub>4</sub> O<sub>4</sub> SH:  
C<sub>27</sub> H<sub>31</sub> N<sub>4</sub> O<sub>4</sub> S<sub>1</sub>  
p (gss, s /p:40) Chrg 1  
R: 100000 Res .Pwr . @FWHM

Isotope:           Min. .. Max.  
 14 N               0....10  
 16 O               0....15  
 12 C               0....65  
 1 H                0....75  
 23 Na              0....0  
 32 S               0....2  
 Tolerance Window: +- 5.00 ppm  
 Db/Ring Equiv:   -3.. 100  
 Fits:              500

N-Rule: Do not use  
 Charge: 1

| Mass     | Theoretical<br>Mass | Delta<br>[ppm] | RDB  | Composition                                                                   |
|----------|---------------------|----------------|------|-------------------------------------------------------------------------------|
| 507.2053 | 507.2054            | -0.1           | 24.0 | C <sub>33</sub> H <sub>25</sub> O <sub>1</sub> N <sub>5</sub>                 |
|          | 507.2052            | 0.2            | -3.0 | C <sub>12</sub> H <sub>37</sub> O <sub>14</sub> N <sub>5</sub> S <sub>1</sub> |
|          | 507.2054            | -0.2           | 5.5  | C <sub>19</sub> H <sub>35</sub> O <sub>6</sub> N <sub>6</sub> S <sub>2</sub>  |
|          | 507.2049            | 0.8            | 18.0 | C <sub>33</sub> H <sub>33</sub> N <sub>1</sub> S <sub>2</sub>                 |
|          | 507.2059            | -1.1           | 11.5 | C <sub>19</sub> H <sub>27</sub> O <sub>7</sub> N <sub>10</sub>                |
|          | 507.2059            | -1.1           | 6.0  | C <sub>20</sub> H <sub>33</sub> O <sub>12</sub> N <sub>3</sub>                |
|          | 507.2047            | 1.2            | 9.5  | C <sub>26</sub> H <sub>35</sub> O <sub>8</sub> S <sub>1</sub>                 |
|          | 507.2047            | 1.2            | 15.0 | C <sub>25</sub> H <sub>29</sub> O <sub>3</sub> N <sub>7</sub> S <sub>1</sub>  |
|          | 507.2061            | -1.5           | 14.5 | C <sub>27</sub> H <sub>31</sub> O <sub>4</sub> N <sub>4</sub> S <sub>1</sub>  |
|          | 507.2045            | 1.5            | 6.5  | C <sub>18</sub> H <sub>31</sub> O <sub>11</sub> N <sub>6</sub>                |
|          | 507.2041            | 2.4            | 0.5  | C <sub>18</sub> H <sub>39</sub> O <sub>10</sub> N <sub>2</sub> S <sub>2</sub> |
|          | 507.2041            | 2.4            | 6.0  | C <sub>17</sub> H <sub>33</sub> O <sub>5</sub> N <sub>9</sub> S <sub>2</sub>  |
|          | 507.2066            | -2.5           | 2.0  | C <sub>13</sub> H <sub>33</sub> O <sub>10</sub> N <sub>9</sub> S <sub>1</sub> |
|          | 507.2040            | 2.5            | 19.0 | C <sub>32</sub> H <sub>29</sub> O <sub>5</sub> N <sub>1</sub>                 |
|          | 507.2040            | 2.5            | 24.5 | C <sub>31</sub> H <sub>23</sub> N <sub>8</sub>                                |
|          | 507.2067            | -2.8           | 23.5 | C <sub>35</sub> H <sub>27</sub> O <sub>2</sub> N <sub>2</sub>                 |
|          | 507.2039            | 2.8            | -2.5 | C <sub>10</sub> H <sub>35</sub> O <sub>13</sub> N <sub>8</sub> S <sub>1</sub> |
|          | 507.2067            | -2.8           | 10.5 | C <sub>20</sub> H <sub>31</sub> O <sub>2</sub> N <sub>10</sub> S <sub>2</sub> |
|          | 507.2067            | -2.8           | 5.0  | C <sub>21</sub> H <sub>37</sub> O <sub>7</sub> N <sub>3</sub> S <sub>2</sub>  |
|          | 507.2072            | -3.8           | 11.0 | C <sub>21</sub> H <sub>29</sub> O <sub>8</sub> N <sub>7</sub>                 |
|          | 507.2072            | -3.8           | 5.5  | C <sub>22</sub> H <sub>35</sub> O <sub>13</sub>                               |
|          | 507.2034            | 3.8            | 10.0 | C <sub>24</sub> H <sub>33</sub> O <sub>7</sub> N <sub>3</sub> S <sub>1</sub>  |
|          | 507.2034            | 3.8            | 15.5 | C <sub>23</sub> H <sub>27</sub> O <sub>2</sub> N <sub>10</sub> S <sub>1</sub> |
|          | 507.2074            | -4.1           | 19.5 | C <sub>28</sub> H <sub>27</sub> N <sub>8</sub> S <sub>1</sub>                 |
|          | 507.2074            | -4.1           | 14.0 | C <sub>29</sub> H <sub>33</sub> O <sub>5</sub> N <sub>1</sub> S <sub>1</sub>  |
|          | 507.2032            | 4.2            | 1.5  | C <sub>17</sub> H <sub>35</sub> O <sub>15</sub> N <sub>2</sub>                |
|          | 507.2032            | 4.2            | 7.0  | C <sub>16</sub> H <sub>29</sub> O <sub>10</sub> N <sub>9</sub>                |

aet7-93-2 MW=500?  
(DCM)/MeOH + NH4OAc

# Compound 32

EPSRC National Centre Swansea  
LTQ Orbitrap XL

adam throup  
21/06/2012 11:37:09

BRASHE219-OJ-HNESP #31-49 RT: 0.77-1.29 AV: 19 SM: 7G NL: 5.19E6

T: FTMS + p NSI Full ms [120.00-2000.00]

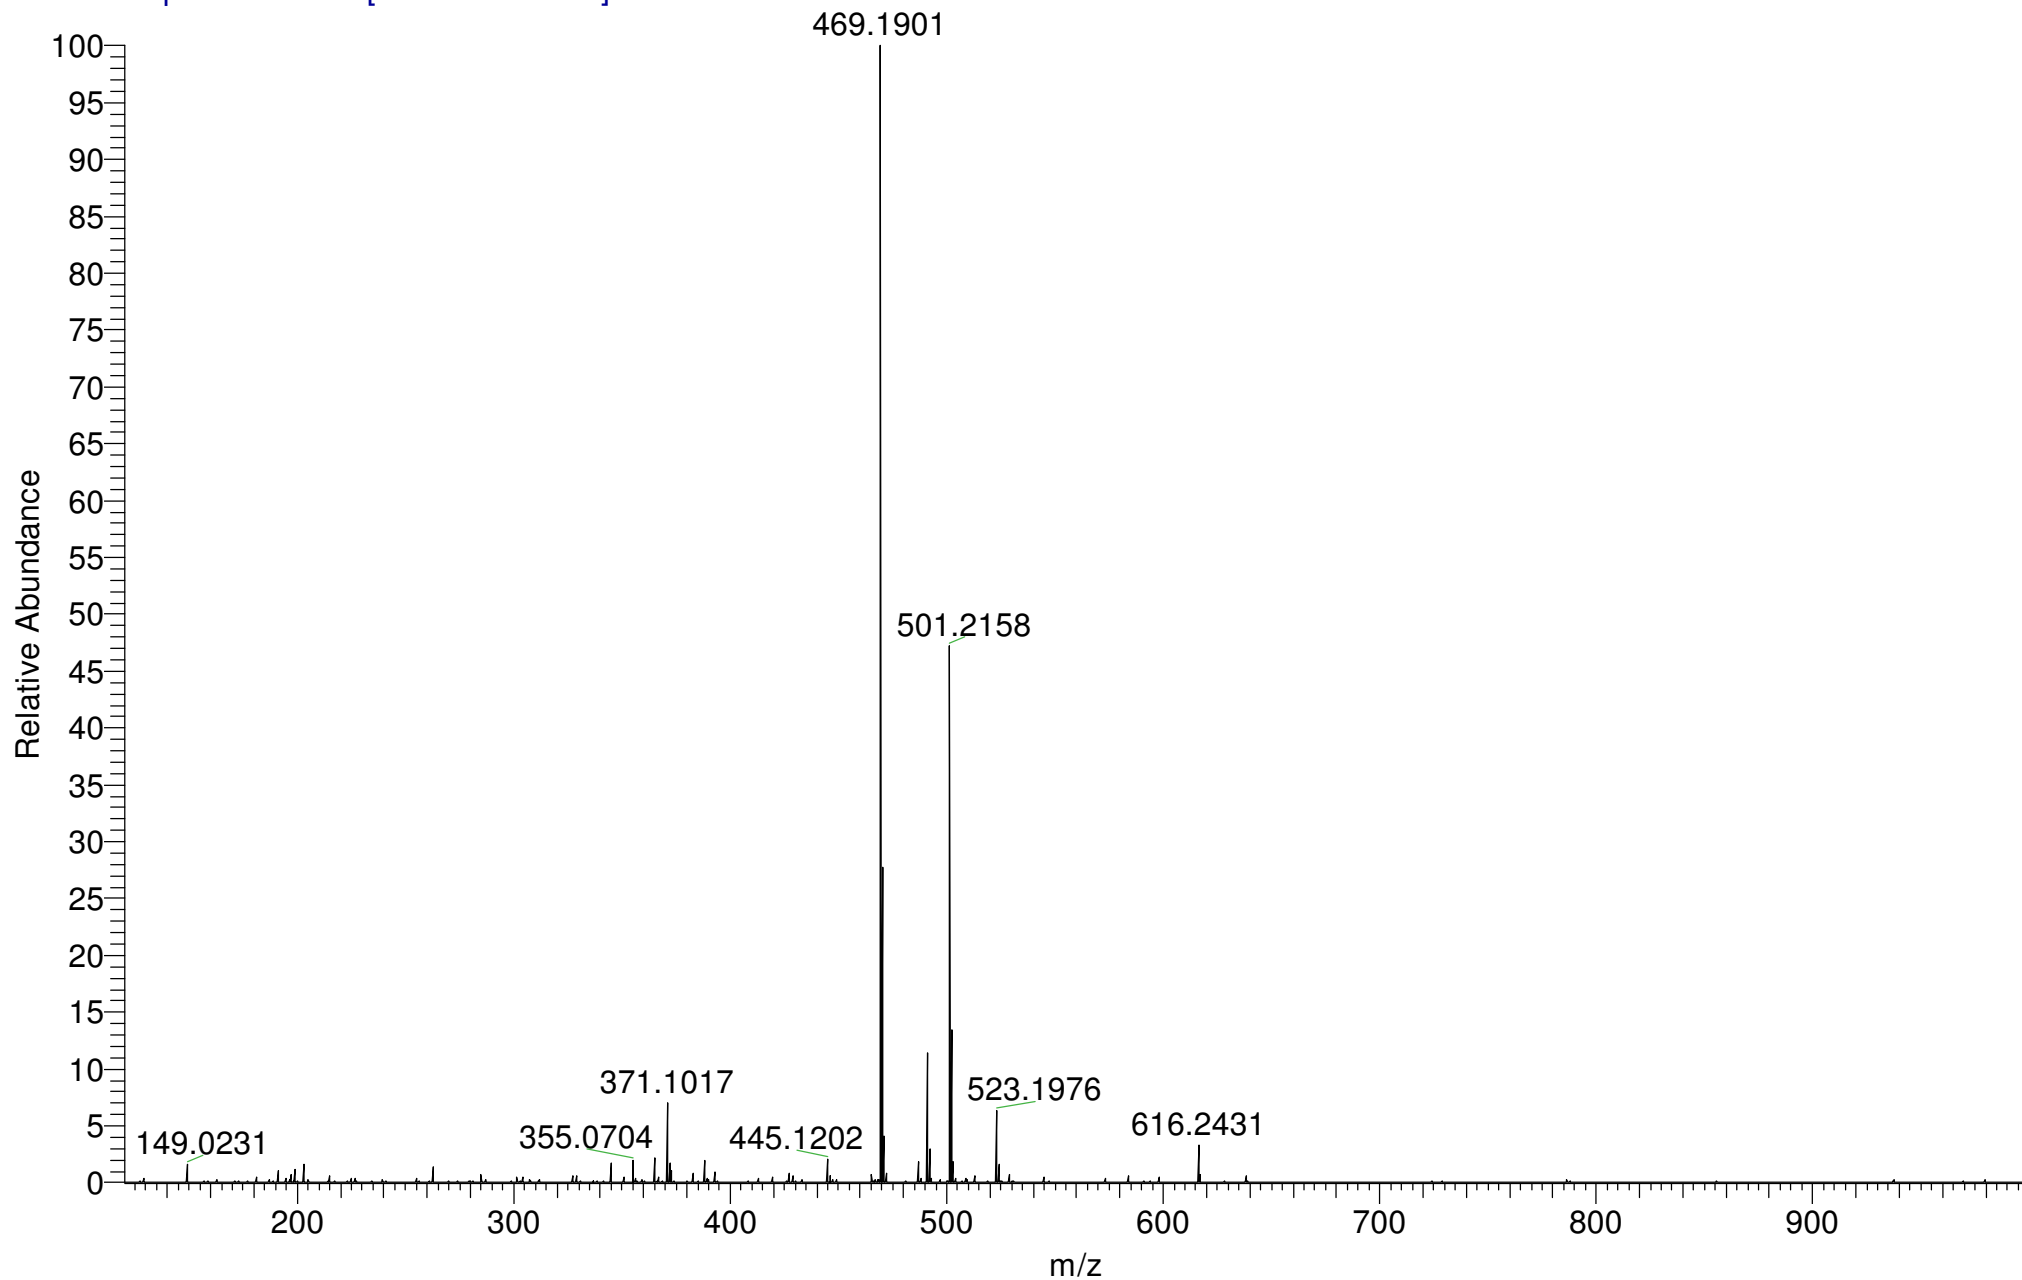

BRASHE219-OJ-HNESP #31-49 RT: 0.77-1.29 AV: 19 SM: 7G NL: 2.45E6

T: FTMS + p NSI Full ms [120.00-2000.00]

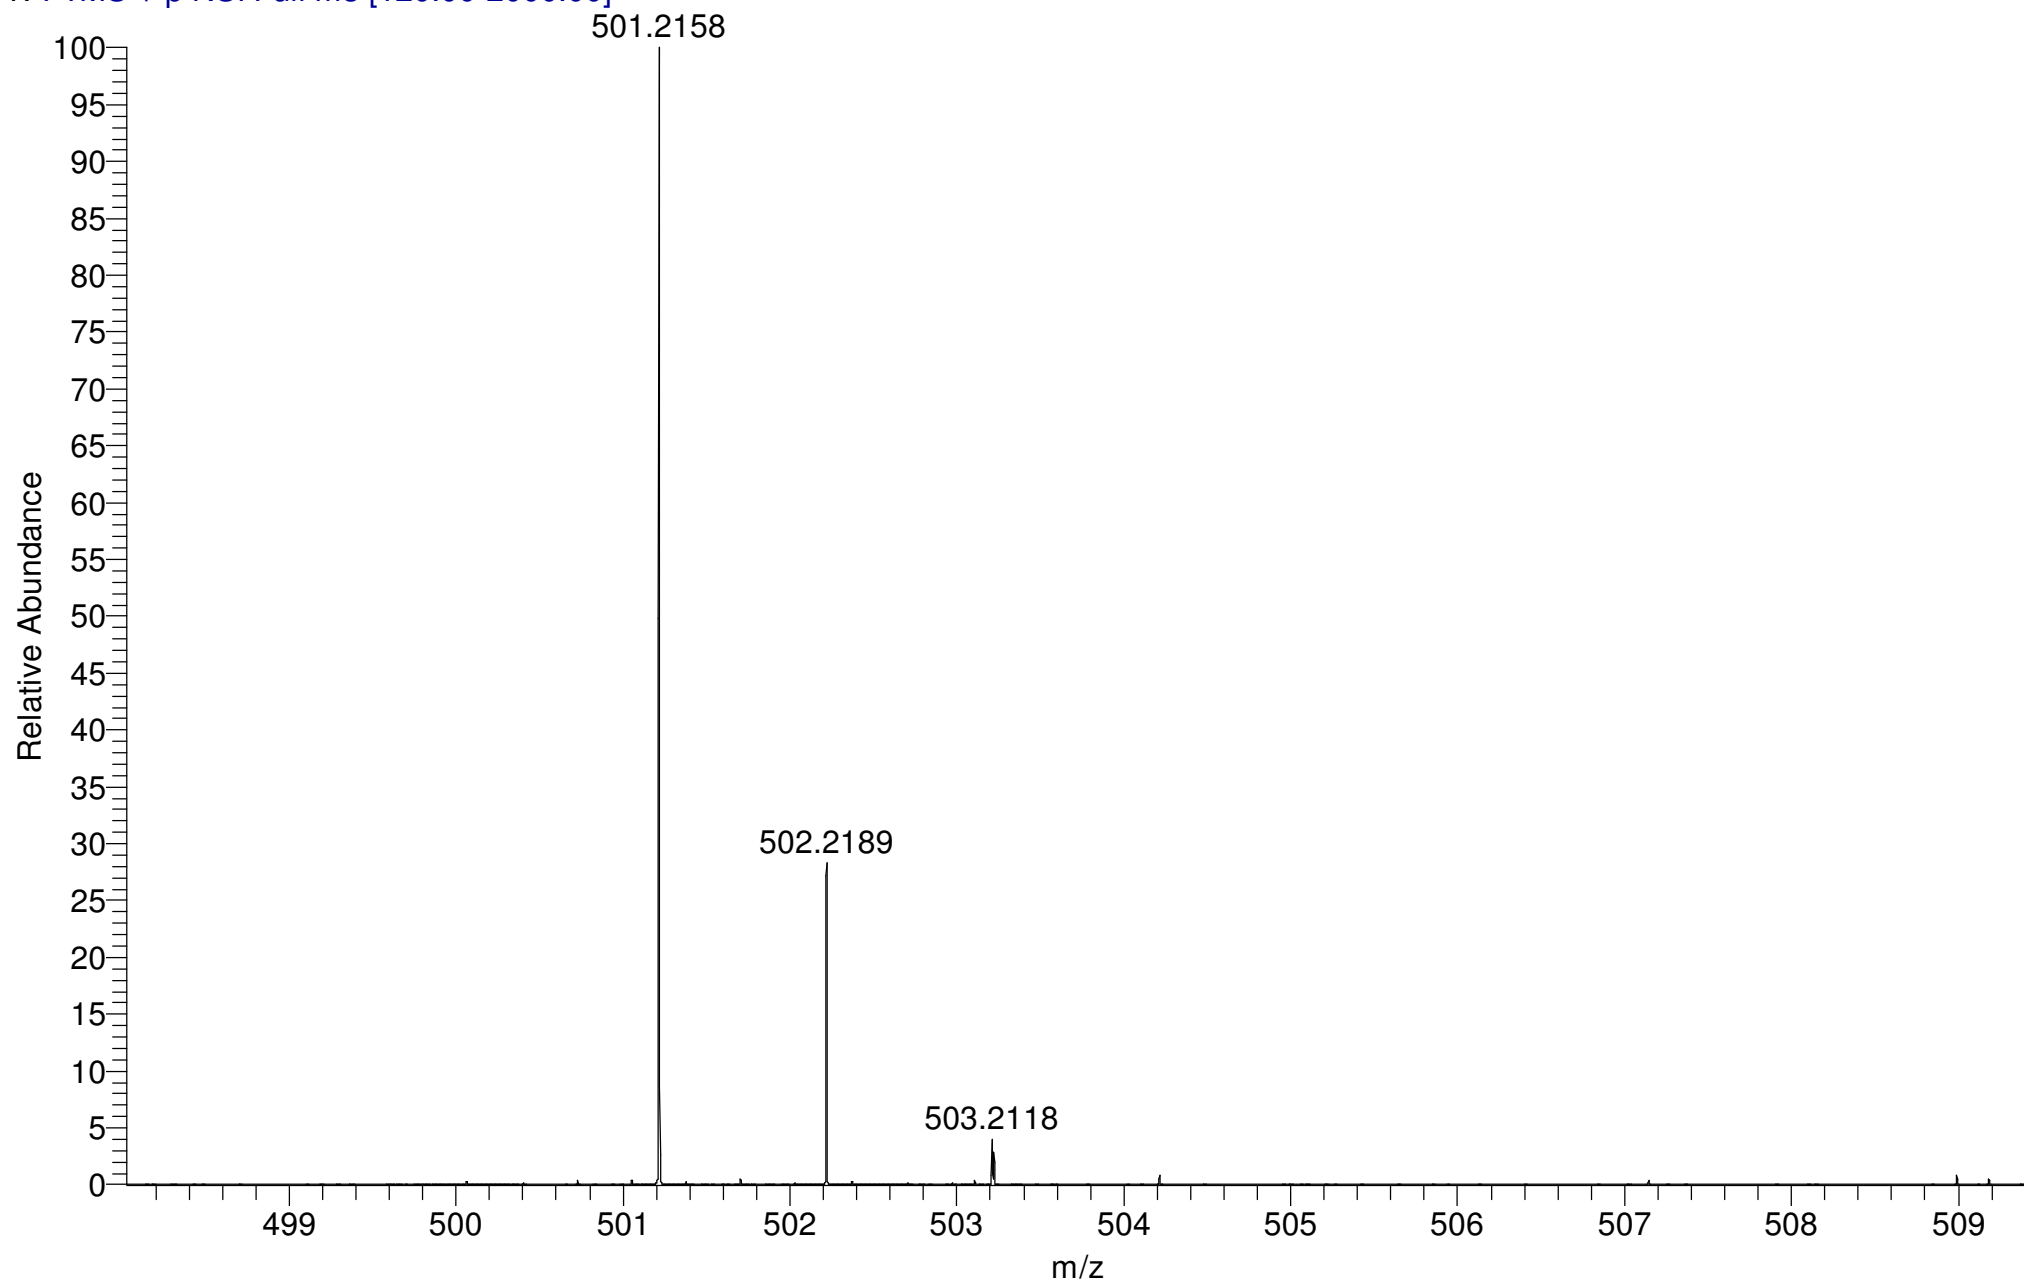

Isotope:           Min. .. Max.  
 12 C               0....60  
 1 H                0....70  
 14 N               0....15  
 16 O               0....15  
 23 Na              0....0  
 32 S               0....3  
 Tolerance Window: +- 5.00 ppm  
 Db/Ring Equiv:   -3.. 100  
 Fits:              100

N-Rule: Do not use  
 Charge: 1

| Mass     | Theoretical Mass | Delta [ppm] | RDB  | Composition                                                                   |
|----------|------------------|-------------|------|-------------------------------------------------------------------------------|
| 501.2158 | 501.2158         | 0.0         | -0.5 | C <sub>9</sub> H <sub>33</sub> O <sub>10</sub> N <sub>12</sub> S <sub>1</sub> |
|          | 501.2159         | -0.3        | 21.0 | C <sub>31</sub> H <sub>27</sub> O <sub>2</sub> N <sub>5</sub>                 |
|          | 501.2160         | -0.3        | 8.0  | C <sub>16</sub> H <sub>31</sub> O <sub>2</sub> N <sub>13</sub> S <sub>2</sub> |
|          | 501.2160         | -0.3        | 2.5  | C <sub>17</sub> H <sub>37</sub> O <sub>7</sub> N <sub>6</sub> S <sub>2</sub>  |
|          | 501.2155         | 0.7         | 15.0 | C <sub>31</sub> H <sub>35</sub> O <sub>1</sub> N <sub>1</sub> S <sub>2</sub>  |
|          | 501.2161         | -0.7        | 5.5  | C <sub>25</sub> H <sub>41</sub> O <sub>4</sub> S <sub>3</sub>                 |
|          | 501.2153         | 1.0         | -1.0 | C <sub>8</sub> H <sub>35</sub> O <sub>4</sub> N <sub>15</sub> S <sub>3</sub>  |
|          | 501.2153         | 1.0         | 6.5  | C <sub>24</sub> H <sub>37</sub> O <sub>9</sub> S <sub>1</sub>                 |
|          | 501.2153         | 1.0         | 12.0 | C <sub>23</sub> H <sub>31</sub> O <sub>4</sub> N <sub>7</sub> S <sub>1</sub>  |
|          | 501.2164         | -1.3        | 8.5  | C <sub>17</sub> H <sub>29</sub> O <sub>8</sub> N <sub>10</sub>                |
|          | 501.2164         | -1.3        | 3.0  | C <sub>18</sub> H <sub>35</sub> O <sub>13</sub> N <sub>3</sub>                |
|          | 501.2151         | 1.4         | 3.5  | C <sub>16</sub> H <sub>33</sub> O <sub>12</sub> N <sub>6</sub>                |
|          | 501.2151         | 1.4         | 9.0  | C <sub>15</sub> H <sub>27</sub> O <sub>7</sub> N <sub>13</sub>                |
|          | 501.2166         | -1.6        | 17.0 | C <sub>24</sub> H <sub>27</sub> N <sub>11</sub> S <sub>1</sub>                |
|          | 501.2166         | -1.6        | 11.5 | C <sub>25</sub> H <sub>33</sub> O <sub>5</sub> N <sub>4</sub> S <sub>1</sub>  |
|          | 501.2167         | -1.7        | -1.5 | C <sub>10</sub> H <sub>37</sub> O <sub>5</sub> N <sub>12</sub> S <sub>3</sub> |
|          | 501.2148         | 2.0         | 6.0  | C <sub>23</sub> H <sub>39</sub> O <sub>3</sub> N <sub>3</sub> S <sub>3</sub>  |
|          | 501.2146         | 2.3         | -2.5 | C <sub>16</sub> H <sub>41</sub> O <sub>11</sub> N <sub>2</sub> S <sub>2</sub> |
|          | 501.2146         | 2.3         | 3.0  | C <sub>15</sub> H <sub>35</sub> O <sub>6</sub> N <sub>9</sub> S <sub>2</sub>  |
|          | 501.2146         | 2.4         | 16.0 | C <sub>30</sub> H <sub>31</sub> O <sub>6</sub> N <sub>1</sub>                 |
|          | 501.2146         | 2.4         | 21.5 | C <sub>29</sub> H <sub>25</sub> O <sub>1</sub> N <sub>8</sub>                 |
|          | 501.2171         | -2.6        | -1.0 | C <sub>11</sub> H <sub>35</sub> O <sub>11</sub> N <sub>9</sub> S <sub>1</sub> |
|          | 501.2144         | 2.7         | 0.0  | C <sub>7</sub> H <sub>31</sub> O <sub>9</sub> N <sub>15</sub> S <sub>1</sub>  |
|          | 501.2173         | -2.9        | 20.5 | C <sub>33</sub> H <sub>29</sub> O <sub>3</sub> N <sub>2</sub>                 |
|          | 501.2173         | -3.0        | 7.5  | C <sub>18</sub> H <sub>33</sub> O <sub>3</sub> N <sub>10</sub> S <sub>2</sub> |
|          | 501.2173         | -3.0        | 2.0  | C <sub>19</sub> H <sub>39</sub> O <sub>8</sub> N <sub>3</sub> S <sub>2</sub>  |
|          | 501.2141         | 3.4         | 15.5 | C <sub>29</sub> H <sub>33</sub> N <sub>4</sub> S <sub>2</sub>                 |
|          | 501.2175         | -3.4        | 10.5 | C <sub>26</sub> H <sub>37</sub> N <sub>4</sub> S <sub>3</sub>                 |
|          | 501.2139         | 3.7         | 7.0  | C <sub>22</sub> H <sub>35</sub> O <sub>8</sub> N <sub>3</sub> S <sub>1</sub>  |
|          | 501.2139         | 3.7         | 12.5 | C <sub>21</sub> H <sub>29</sub> O <sub>3</sub> N <sub>10</sub> S <sub>1</sub> |
|          | 501.2178         | -3.9        | 13.5 | C <sub>18</sub> H <sub>25</sub> O <sub>4</sub> N <sub>14</sub>                |

aet7-96 MW=542?  
(DCM)/MeOH + NH4OAc

# Compound 33

EPSRC National Centre Swansea  
LTQ Orbitrap XL

adam throup  
21/06/2012 11:33:42

BRASHE218-OJ-HNESP #34-46 RT: 0.86-1.21 AV: 13 SM: 7G NL: 3.26E6

T: FTMS + p NSI Full ms [120.00-2000.00]

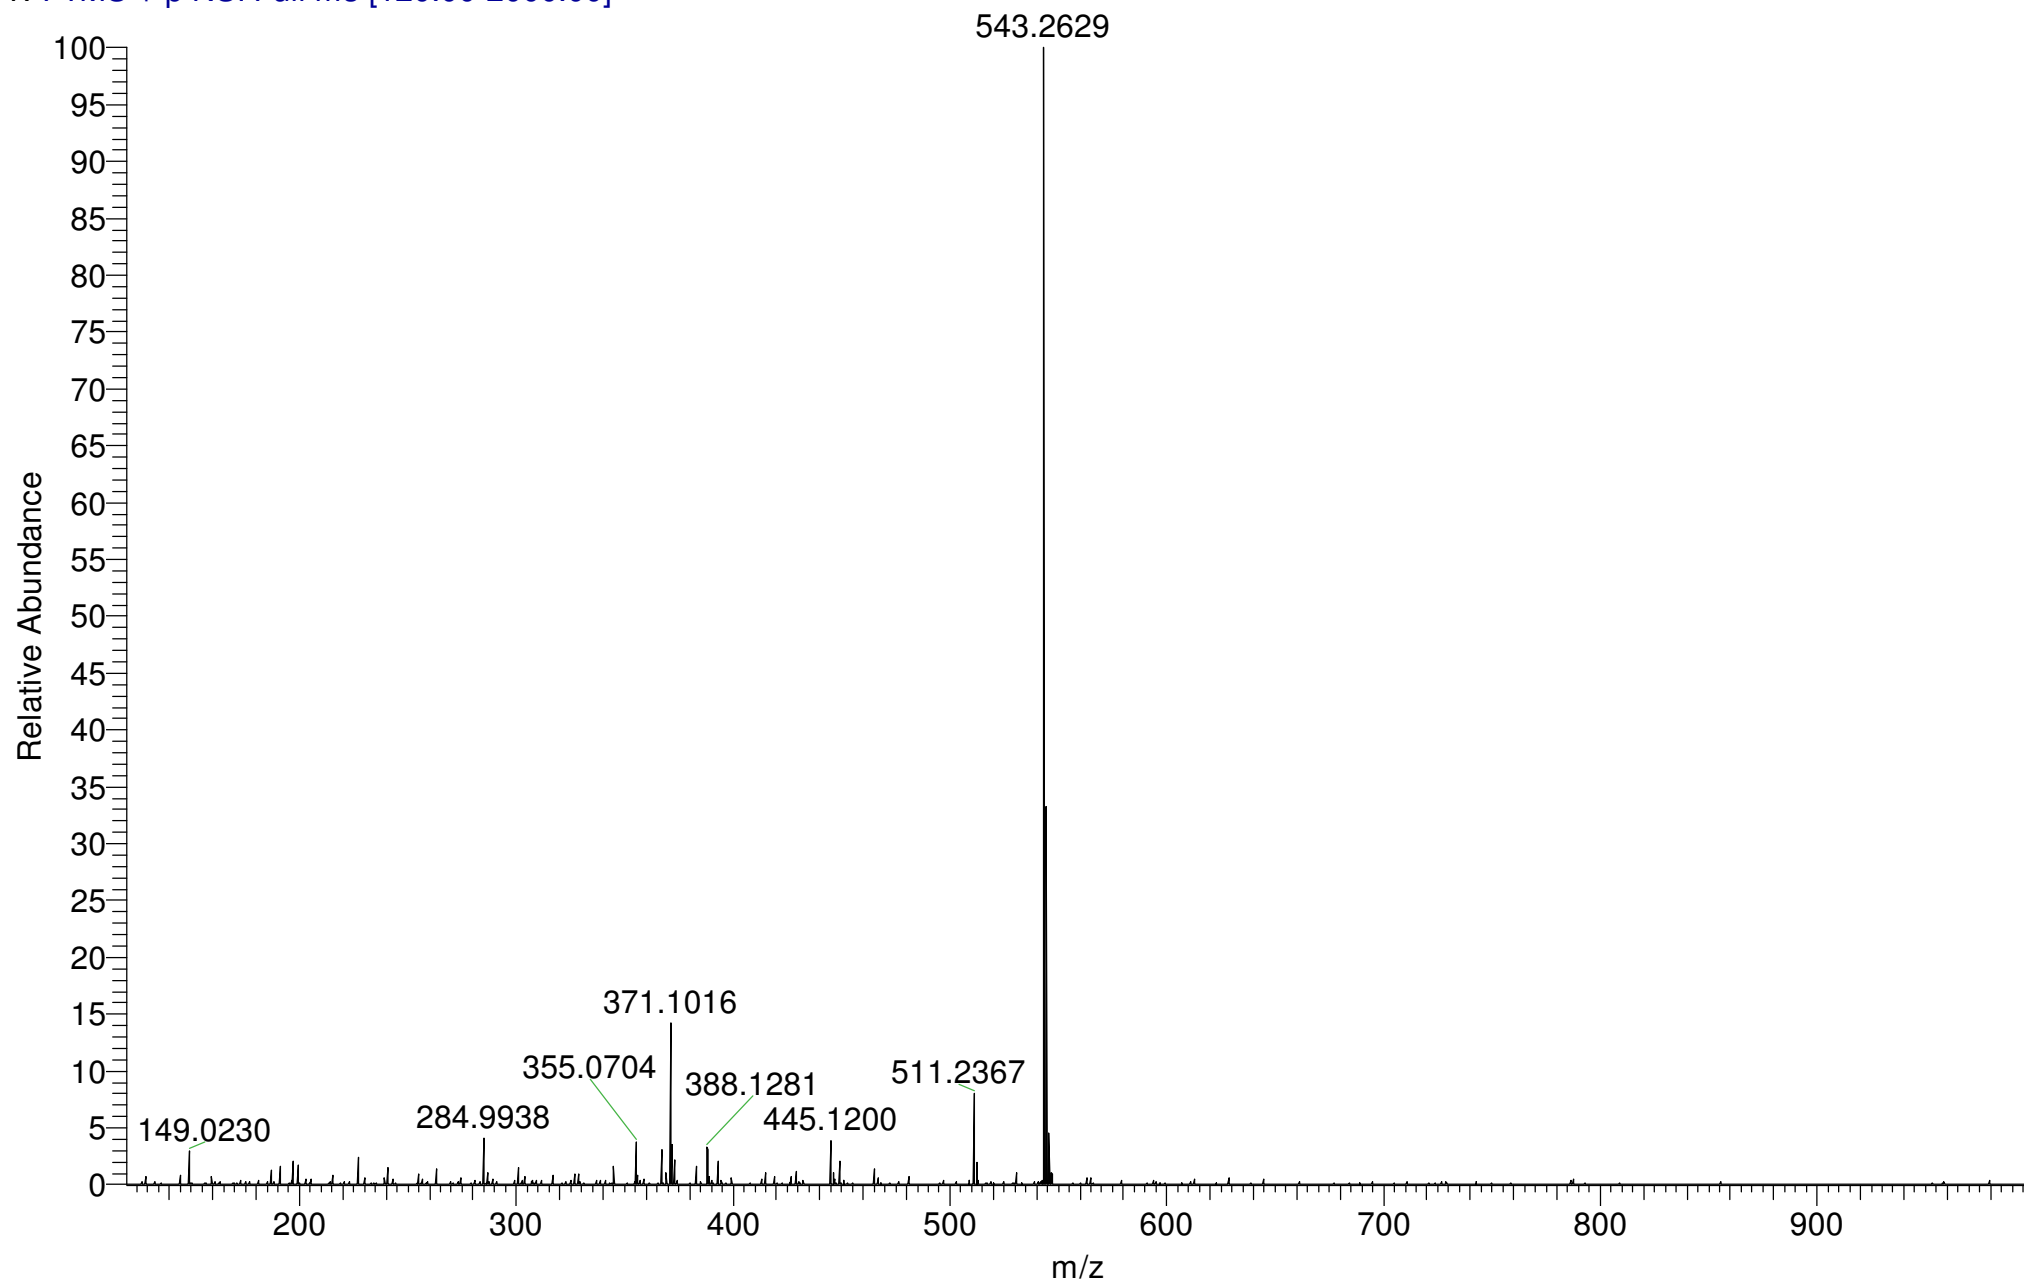

BRASHE218-OJ-HNESP #34-46 RT: 0.86-1.21 AV: 13 SM: 7G NL: 3.26E6  
T: FTMS + p NSI Full ms [120.00-2000.00]

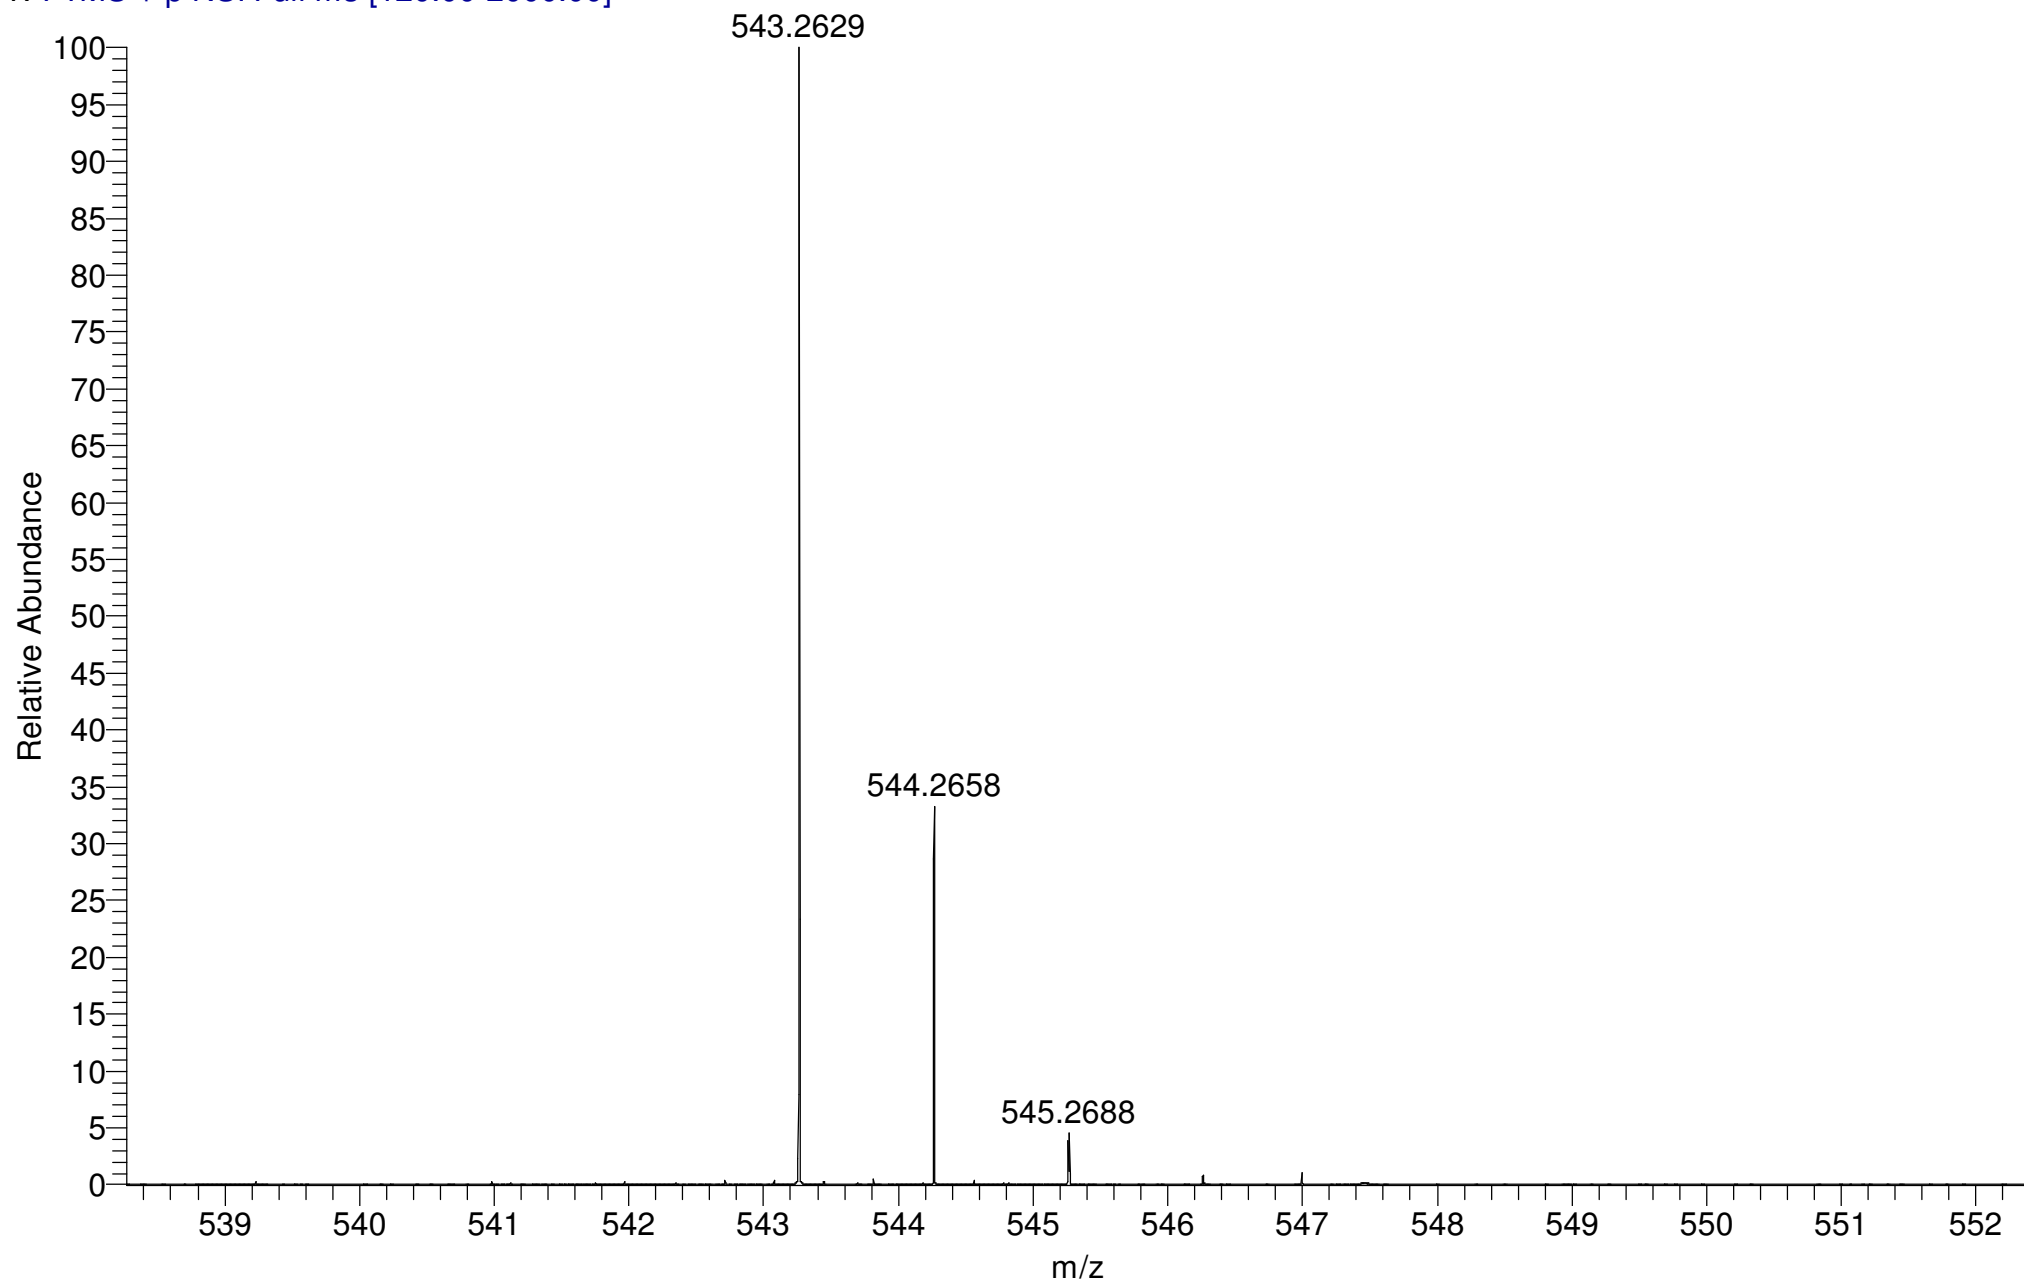

Isotope:           Min. .. Max.  
 12 C               0....60  
 1 H                0....70  
 14 N               0....15  
 16 O               0....15  
 23 Na              0....0  
 32 S               0....3  
 Tolerance Window: +- 5.00 ppm  
 Db/Ring Equiv:   -3.. 100  
 Fits:              100

N-Rule: Do not use  
 Charge: 1

| Mass     | Theoretical<br>Mass | Delta<br>[ppm] | RDB  | Composition                                                                    |
|----------|---------------------|----------------|------|--------------------------------------------------------------------------------|
| 543.2629 | 543.2629            | -0.0           | 8.0  | C <sub>19</sub> H <sub>37</sub> O <sub>2</sub> N <sub>13</sub> S <sub>2</sub>  |
|          | 543.2629            | -0.0           | 2.5  | C <sub>20</sub> H <sub>43</sub> O <sub>7</sub> N <sub>6</sub> S <sub>2</sub>   |
|          | 543.2629            | 0.0            | 21.0 | C <sub>34</sub> H <sub>33</sub> O <sub>2</sub> N <sub>5</sub>                  |
|          | 543.2627            | 0.3            | -0.5 | C <sub>12</sub> H <sub>39</sub> O <sub>10</sub> N <sub>12</sub> S <sub>1</sub> |
|          | 543.2631            | -0.4           | 5.5  | C <sub>28</sub> H <sub>47</sub> O <sub>4</sub> S <sub>3</sub>                  |
|          | 543.2634            | -0.9           | 8.5  | C <sub>20</sub> H <sub>35</sub> O <sub>8</sub> N <sub>10</sub>                 |
|          | 543.2634            | -0.9           | 3.0  | C <sub>21</sub> H <sub>41</sub> O <sub>13</sub> N <sub>3</sub>                 |
|          | 543.2624            | 0.9            | 15.0 | C <sub>34</sub> H <sub>41</sub> O <sub>1</sub> N <sub>1</sub> S <sub>2</sub>   |
|          | 543.2623            | 1.2            | -1.0 | C <sub>11</sub> H <sub>41</sub> O <sub>4</sub> N <sub>15</sub> S <sub>3</sub>  |
|          | 543.2636            | -1.2           | 17.0 | C <sub>27</sub> H <sub>33</sub> N <sub>11</sub> S <sub>1</sub>                 |
|          | 543.2636            | -1.2           | 11.5 | C <sub>28</sub> H <sub>39</sub> O <sub>5</sub> N <sub>4</sub> S <sub>1</sub>   |
|          | 543.2622            | 1.2            | 6.5  | C <sub>27</sub> H <sub>43</sub> O <sub>9</sub> S <sub>1</sub>                  |
|          | 543.2622            | 1.2            | 12.0 | C <sub>26</sub> H <sub>37</sub> O <sub>4</sub> N <sub>7</sub> S <sub>1</sub>   |
|          | 543.2636            | -1.3           | -1.5 | C <sub>13</sub> H <sub>43</sub> O <sub>5</sub> N <sub>12</sub> S <sub>3</sub>  |
|          | 543.2620            | 1.6            | 3.5  | C <sub>19</sub> H <sub>39</sub> O <sub>12</sub> N <sub>6</sub>                 |
|          | 543.2620            | 1.6            | 9.0  | C <sub>18</sub> H <sub>33</sub> O <sub>7</sub> N <sub>13</sub>                 |
|          | 543.2618            | 2.1            | 6.0  | C <sub>26</sub> H <sub>45</sub> O <sub>3</sub> N <sub>3</sub> S <sub>3</sub>   |
|          | 543.2641            | -2.2           | -1.0 | C <sub>14</sub> H <sub>41</sub> O <sub>11</sub> N <sub>9</sub> S <sub>1</sub>  |
|          | 543.2642            | -2.4           | 20.5 | C <sub>36</sub> H <sub>35</sub> O <sub>3</sub> N <sub>2</sub>                  |
|          | 543.2616            | 2.4            | -2.5 | C <sub>19</sub> H <sub>47</sub> O <sub>11</sub> N <sub>2</sub> S <sub>2</sub>  |
|          | 543.2616            | 2.4            | 3.0  | C <sub>18</sub> H <sub>41</sub> O <sub>6</sub> N <sub>9</sub> S <sub>2</sub>   |
|          | 543.2643            | -2.5           | 7.5  | C <sub>21</sub> H <sub>39</sub> O <sub>3</sub> N <sub>10</sub> S <sub>2</sub>  |
|          | 543.2643            | -2.5           | 2.0  | C <sub>22</sub> H <sub>45</sub> O <sub>8</sub> N <sub>3</sub> S <sub>2</sub>   |
|          | 543.2615            | 2.5            | 16.0 | C <sub>33</sub> H <sub>37</sub> O <sub>6</sub> N <sub>1</sub>                  |
|          | 543.2615            | 2.5            | 21.5 | C <sub>32</sub> H <sub>31</sub> O <sub>1</sub> N <sub>8</sub>                  |
|          | 543.2614            | 2.8            | 0.0  | C <sub>10</sub> H <sub>37</sub> O <sub>9</sub> N <sub>15</sub> S <sub>1</sub>  |
|          | 543.2644            | -2.8           | 10.5 | C <sub>29</sub> H <sub>43</sub> N <sub>4</sub> S <sub>3</sub>                  |
|          | 543.2647            | -3.4           | 13.5 | C <sub>21</sub> H <sub>31</sub> O <sub>4</sub> N <sub>14</sub>                 |
|          | 543.2647            | -3.4           | 8.0  | C <sub>22</sub> H <sub>37</sub> O <sub>9</sub> N <sub>7</sub>                  |
|          | 543.2647            | -3.4           | 2.5  | C <sub>23</sub> H <sub>43</sub> O <sub>14</sub>                                |
|          | 543.2611            | 3.4            | 15.5 | C <sub>32</sub> H <sub>39</sub> N <sub>4</sub> S <sub>2</sub>                  |



| Mass     | Theoretical<br>Mass | Delta<br>[ppm] | RDB  | Composition                                                                   |
|----------|---------------------|----------------|------|-------------------------------------------------------------------------------|
| 543.2649 | 543.2649            | -3.7           | 16.5 | C <sub>29</sub> H <sub>35</sub> O <sub>1</sub> N <sub>8</sub> S <sub>1</sub>  |
| 543.2649 | 543.2649            | -3.7           | 11.0 | C <sub>30</sub> H <sub>41</sub> O <sub>6</sub> N <sub>1</sub> S <sub>1</sub>  |
| 543.2609 | 543.2609            | 3.7            | 7.0  | C <sub>25</sub> H <sub>41</sub> O <sub>8</sub> N <sub>3</sub> S <sub>1</sub>  |
| 543.2609 | 543.2609            | 3.7            | 12.5 | C <sub>24</sub> H <sub>35</sub> O <sub>3</sub> N <sub>10</sub> S <sub>1</sub> |
| 543.2649 | 543.2649            | -3.8           | -2.0 | C <sub>15</sub> H <sub>45</sub> O <sub>6</sub> N <sub>9</sub> S <sub>3</sub>  |
| 543.2607 | 543.2607            | 4.0            | 4.0  | C <sub>17</sub> H <sub>37</sub> O <sub>11</sub> N <sub>9</sub>                |
| 543.2604 | 543.2604            | 4.6            | 6.5  | C <sub>24</sub> H <sub>43</sub> O <sub>2</sub> N <sub>6</sub> S <sub>3</sub>  |
| 543.2654 | 543.2654            | -4.6           | 4.0  | C <sub>15</sub> H <sub>37</sub> O <sub>7</sub> N <sub>13</sub> S <sub>1</sub> |
| 543.2654 | 543.2654            | -4.6           | -1.5 | C <sub>16</sub> H <sub>43</sub> O <sub>12</sub> N <sub>6</sub> S <sub>1</sub> |
| 543.2602 | 543.2602            | 4.9            | -2.0 | C <sub>17</sub> H <sub>45</sub> O <sub>10</sub> N <sub>5</sub> S <sub>2</sub> |
| 543.2602 | 543.2602            | 4.9            | 3.5  | C <sub>16</sub> H <sub>39</sub> O <sub>5</sub> N <sub>12</sub> S <sub>2</sub> |
| 543.2656 | 543.2656            | -5.0           | 7.0  | C <sub>23</sub> H <sub>41</sub> O <sub>4</sub> N <sub>7</sub> S <sub>2</sub>  |
| 543.2656 | 543.2656            | -5.0           | 1.5  | C <sub>24</sub> H <sub>47</sub> O <sub>9</sub> S <sub>2</sub>                 |
| 543.2602 | 543.2602            | 5.0            | 16.5 | C <sub>31</sub> H <sub>35</sub> O <sub>5</sub> N <sub>4</sub>                 |
| 543.2602 | 543.2602            | 5.0            | 22.0 | C <sub>30</sub> H <sub>29</sub> N <sub>11</sub>                               |

aet9-1-2 MW=468?  
(DCM)/MeOH + NH4OAc

# Compound 34

EPSRC National Centre Swansea  
LTQ Orbitrap XL

adam throup  
01/08/2012 10:21:47

BRASHE223-OJ-HNESP #31-49 RT: 0.75-1.28 AV: 19 SM: 7G NL: 3.30E6

T: FTMS + p NSI Full ms [120.00-2000.00]

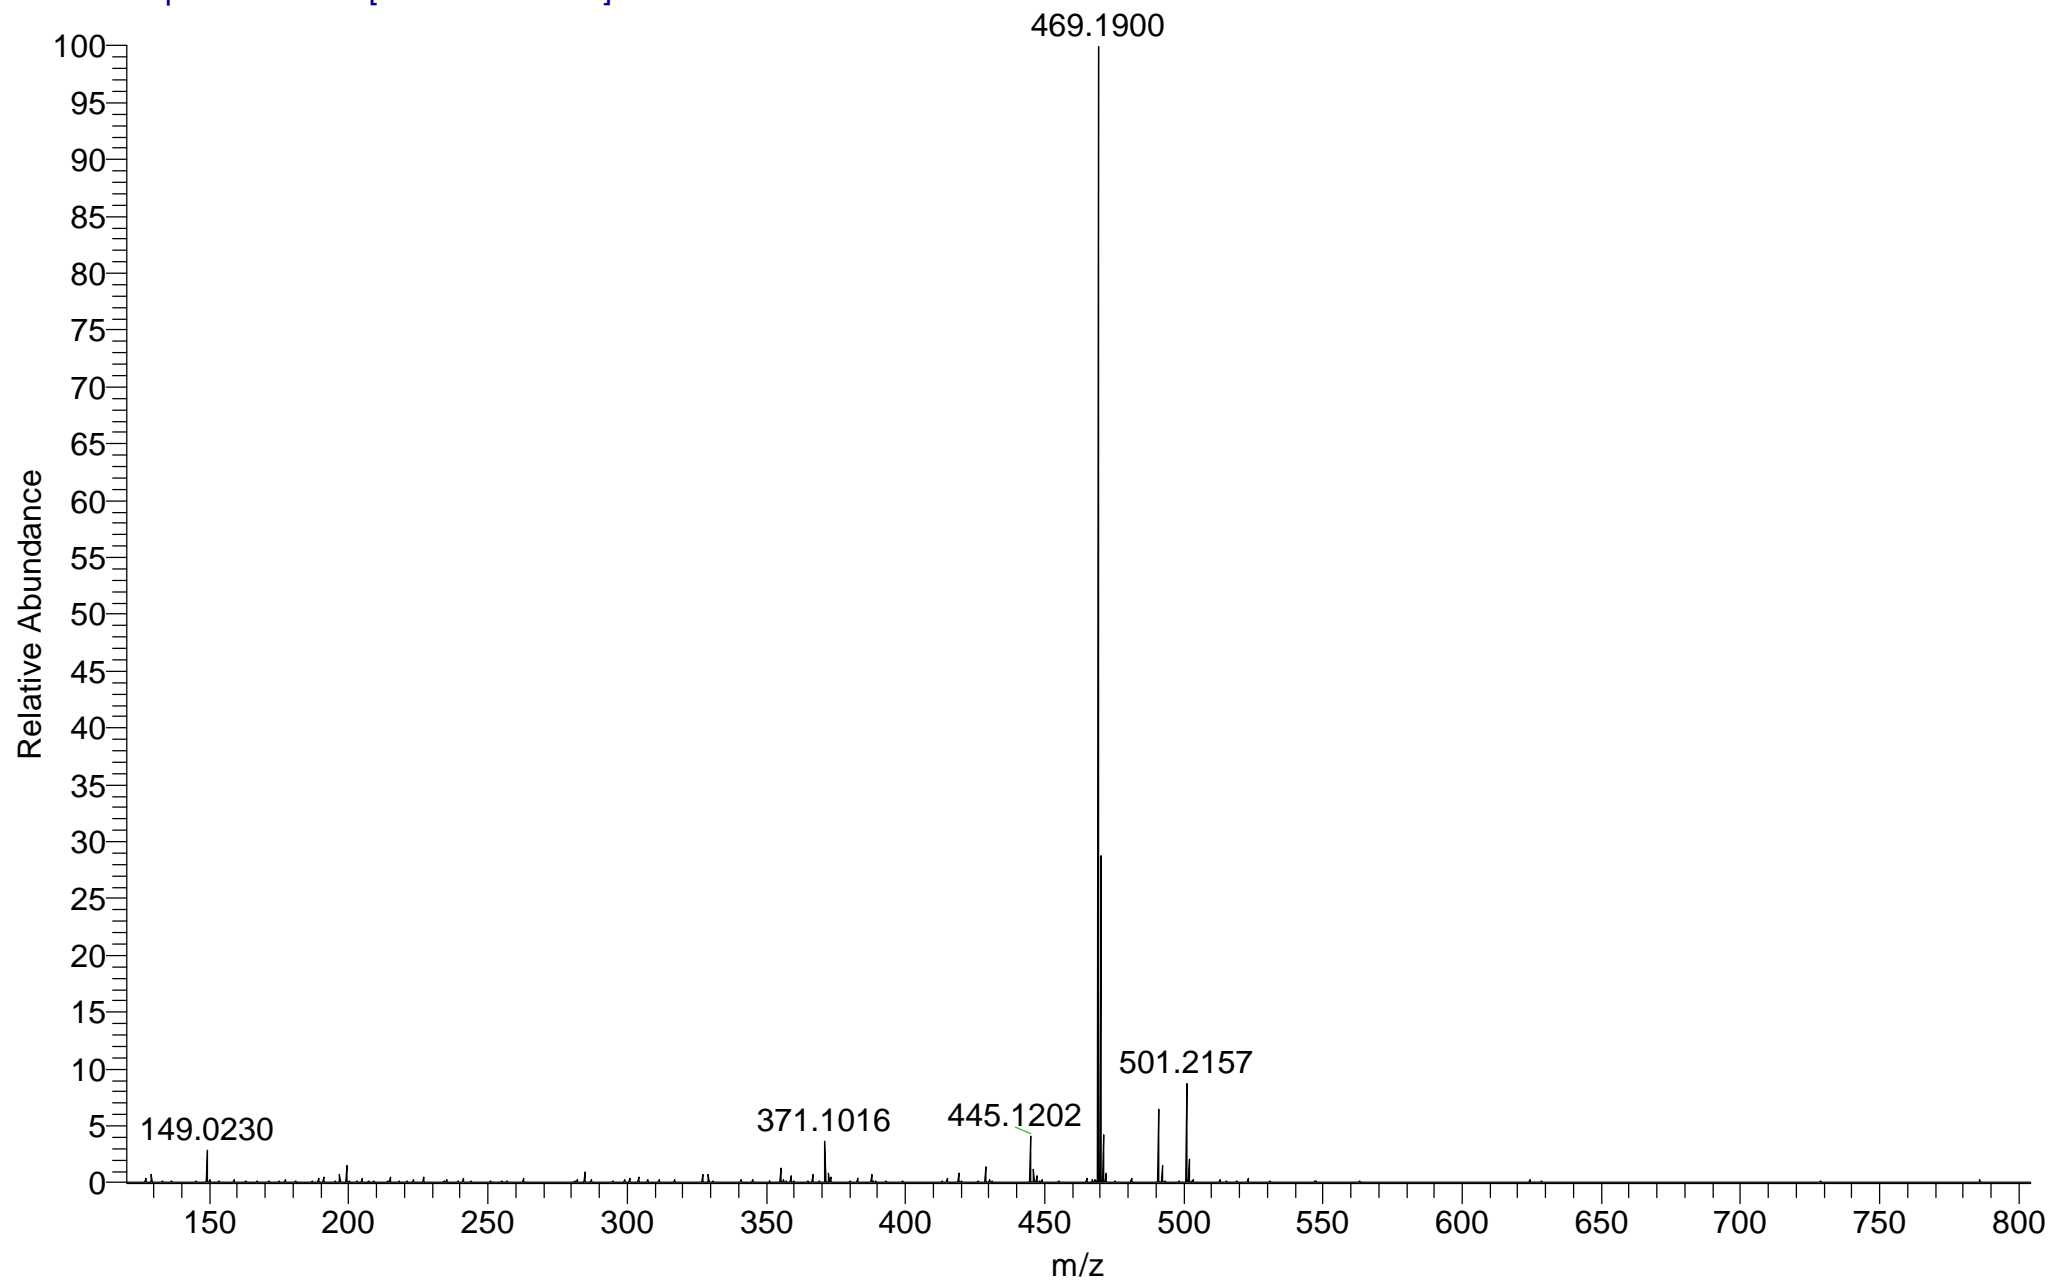

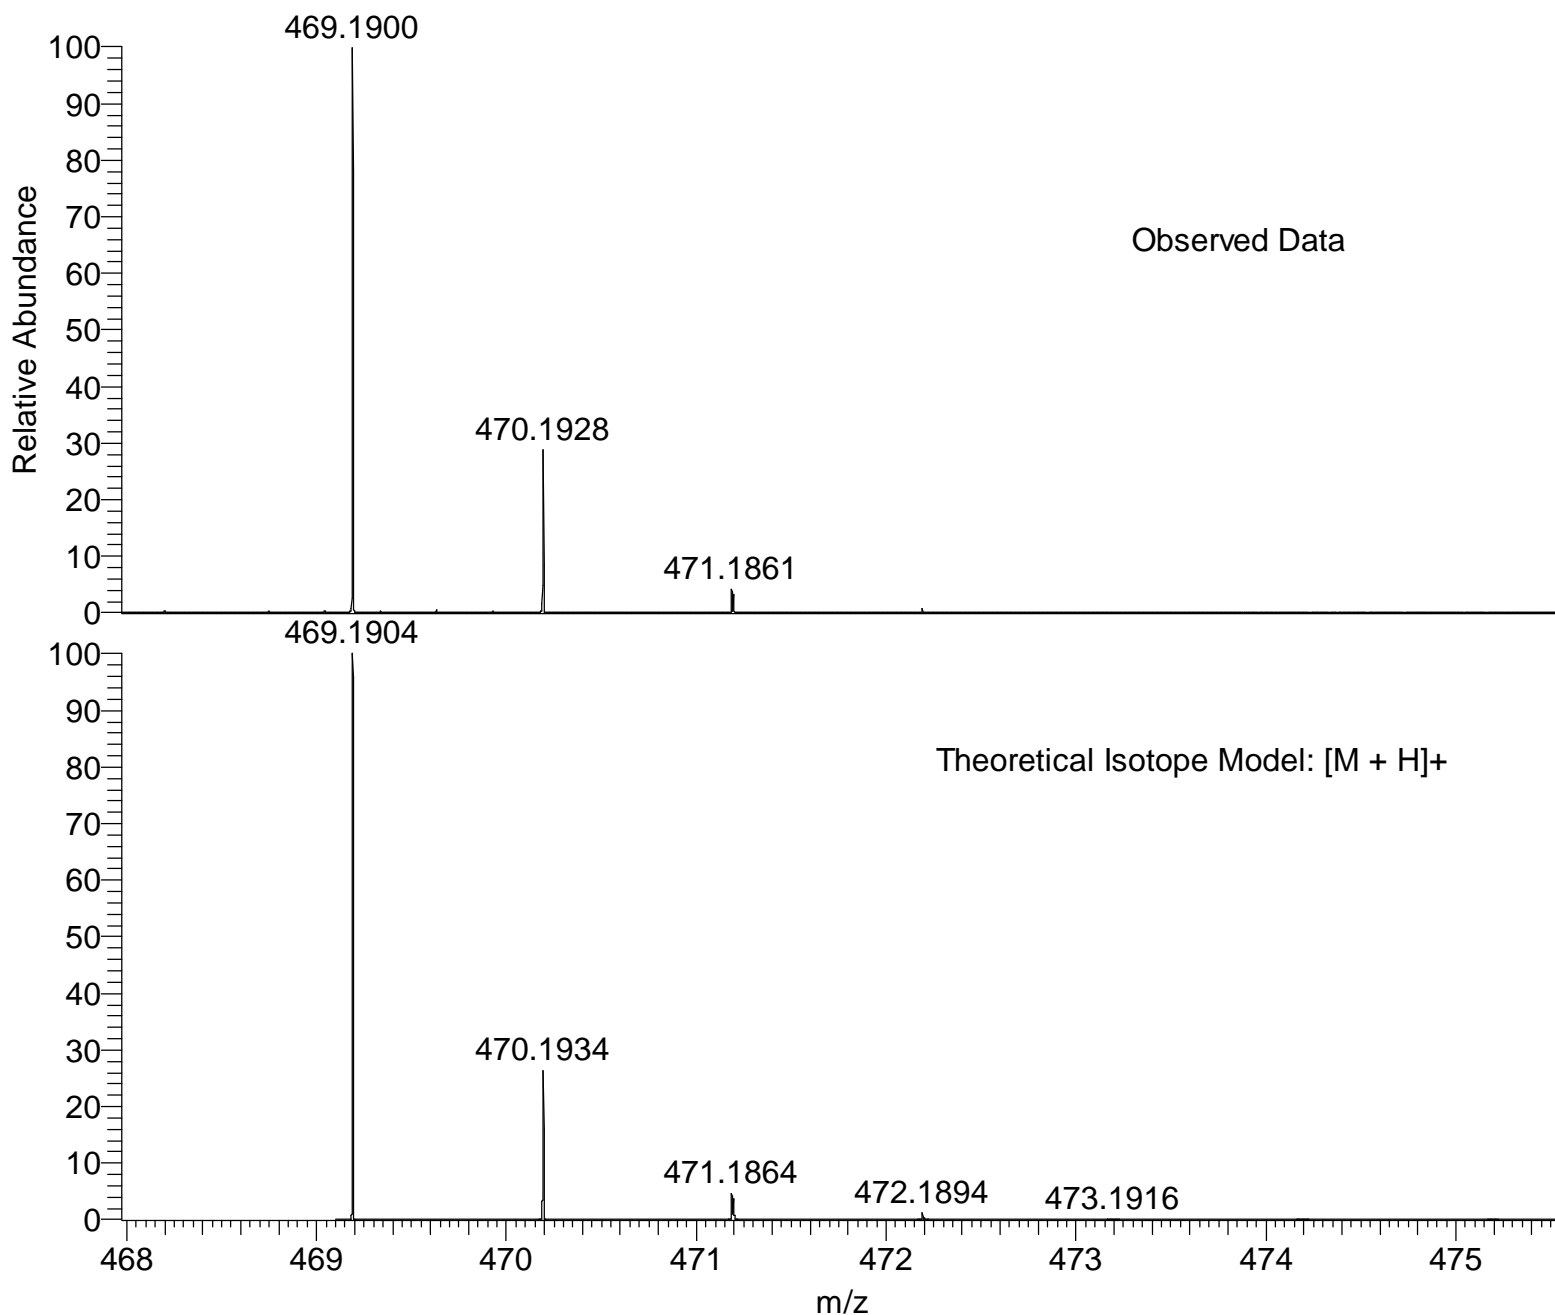

NL:  
3.30E6  
BRASHE223-OJ-HNESP#31-  
49 RT: 0.75-1.28 AV: 19 T:  
FTMS + p NSI Full ms  
[120.00-2000.00]

NL:  
1.67E4  
C<sub>24</sub> H<sub>28</sub> N<sub>4</sub> O<sub>4</sub> SH:  
C<sub>24</sub> H<sub>29</sub> N<sub>4</sub> O<sub>4</sub> S<sub>1</sub>  
p (gss, s /p:40) Chrg 1  
R: 100000 Res .Pwr . @FWHM

Isotope:           Min. .. Max.  
 14 N               0....14  
 16 O               0....14  
 12 C               0....60  
 1 H                0....70  
 23 Na              0....0  
 32 S               0....4

Tolerance Window:           +- 5.00 ppm  
 Db/Ring Equiv: -3.. 100       N-Rule: Do not use  
 Fits:               100           Charge: 1

| Mass     | Theoretical<br>Mass | Delta<br>[ppm] | RDB  | Composition                                                                   |
|----------|---------------------|----------------|------|-------------------------------------------------------------------------------|
| 469.1900 | 469.1899            | 0.1            | 6.5  | C <sub>24</sub> H <sub>37</sub> O <sub>3</sub> S <sub>3</sub>                 |
|          | 469.1902            | -0.5           | 9.5  | C <sub>16</sub> H <sub>25</sub> O <sub>7</sub> N <sub>10</sub>                |
|          | 469.1902            | -0.5           | 4.0  | C <sub>17</sub> H <sub>31</sub> O <sub>12</sub> N <sub>3</sub>                |
|          | 469.1898            | 0.5            | 3.5  | C <sub>16</sub> H <sub>33</sub> O <sub>6</sub> N <sub>6</sub> S <sub>2</sub>  |
|          | 469.1897            | 0.5            | 9.0  | C <sub>15</sub> H <sub>27</sub> O <sub>1</sub> N <sub>13</sub> S <sub>2</sub> |
|          | 469.1897            | 0.6            | 22.0 | C <sub>30</sub> H <sub>23</sub> O <sub>1</sub> N <sub>5</sub> S <sub>2</sub>  |
|          | 469.1904            | -0.9           | 12.5 | C <sub>24</sub> H <sub>29</sub> O <sub>4</sub> N <sub>4</sub> S <sub>1</sub>  |
|          | 469.1896            | 0.9            | 0.5  | C <sub>8</sub> H <sub>29</sub> O <sub>9</sub> N <sub>12</sub> S <sub>1</sub>  |
|          | 469.1904            | -0.9           | -0.5 | C <sub>9</sub> H <sub>33</sub> O <sub>4</sub> N <sub>12</sub> S <sub>3</sub>  |
|          | 469.1906            | -1.3           | 2.5  | C <sub>17</sub> H <sub>37</sub> O <sub>1</sub> N <sub>6</sub> S <sub>4</sub>  |
|          | 469.1893            | 1.5            | -2.5 | C <sub>16</sub> H <sub>41</sub> O <sub>5</sub> N <sub>2</sub> S <sub>4</sub>  |
|          | 469.1893            | 1.5            | 3.0  | C <sub>15</sub> H <sub>35</sub> N <sub>9</sub> S <sub>4</sub>                 |
|          | 469.1892            | 1.6            | 16.0 | C <sub>30</sub> H <sub>31</sub> N <sub>1</sub> S <sub>2</sub>                 |
|          | 469.1909            | -1.9           | 0.0  | C <sub>10</sub> H <sub>31</sub> O <sub>10</sub> N <sub>9</sub> S <sub>1</sub> |
|          | 469.1891            | 2.0            | 7.5  | C <sub>23</sub> H <sub>33</sub> O <sub>8</sub> S <sub>1</sub>                 |
|          | 469.1891            | 2.0            | 13.0 | C <sub>22</sub> H <sub>27</sub> O <sub>3</sub> N <sub>7</sub> S <sub>1</sub>  |
|          | 469.1911            | -2.2           | 21.5 | C <sub>32</sub> H <sub>25</sub> O <sub>2</sub> N <sub>2</sub> S <sub>2</sub>  |
|          | 469.1911            | -2.3           | 8.5  | C <sub>17</sub> H <sub>29</sub> O <sub>2</sub> N <sub>10</sub> S <sub>2</sub> |
|          | 469.1911            | -2.3           | 3.0  | C <sub>18</sub> H <sub>35</sub> O <sub>7</sub> N <sub>3</sub> S <sub>2</sub>  |
|          | 469.1889            | 2.4            | 4.5  | C <sub>15</sub> H <sub>29</sub> O <sub>11</sub> N <sub>6</sub>                |
|          | 469.1889            | 2.4            | 10.0 | C <sub>14</sub> H <sub>23</sub> O <sub>6</sub> N <sub>13</sub>                |
|          | 469.1886            | 3.0            | 7.0  | C <sub>22</sub> H <sub>35</sub> O <sub>2</sub> N <sub>3</sub> S <sub>3</sub>  |
|          | 469.1916            | -3.3           | 14.5 | C <sub>17</sub> H <sub>21</sub> O <sub>3</sub> N <sub>14</sub>                |
|          | 469.1916            | -3.3           | 9.0  | C <sub>18</sub> H <sub>27</sub> O <sub>8</sub> N <sub>7</sub>                 |
|          | 469.1916            | -3.3           | 3.5  | C <sub>19</sub> H <sub>33</sub> O <sub>13</sub>                               |
|          | 469.1884            | 3.4            | -1.5 | C <sub>15</sub> H <sub>37</sub> O <sub>10</sub> N <sub>2</sub> S <sub>2</sub> |
|          | 469.1884            | 3.4            | 4.0  | C <sub>14</sub> H <sub>31</sub> O <sub>5</sub> N <sub>9</sub> S <sub>2</sub>  |
|          | 469.1884            | 3.5            | 17.0 | C <sub>29</sub> H <sub>27</sub> O <sub>5</sub> N <sub>1</sub>                 |
|          | 469.1884            | 3.5            | 22.5 | C <sub>28</sub> H <sub>21</sub> N <sub>8</sub>                                |
|          | 469.1917            | -3.7           | 17.5 | C <sub>25</sub> H <sub>25</sub> N <sub>8</sub> S <sub>1</sub>                 |
|          | 469.1917            | -3.7           | 12.0 | C <sub>26</sub> H <sub>31</sub> O <sub>5</sub> N <sub>1</sub> S <sub>1</sub>  |

aet9-2-2 MW=510?  
(DCM)/MeOH + NH4OAc

# Compound 35

EPSRC National Centre Swansea  
LTQ Orbitrap XL

adam throup  
01/08/2012 10:25:14

BRASHE224-OJ-HNESP #29-50 RT: 0.71-1.29 AV: 21 SM: 7G NL: 4.81E5

T: FTMS + p NSI Full ms [120.00-2000.00]

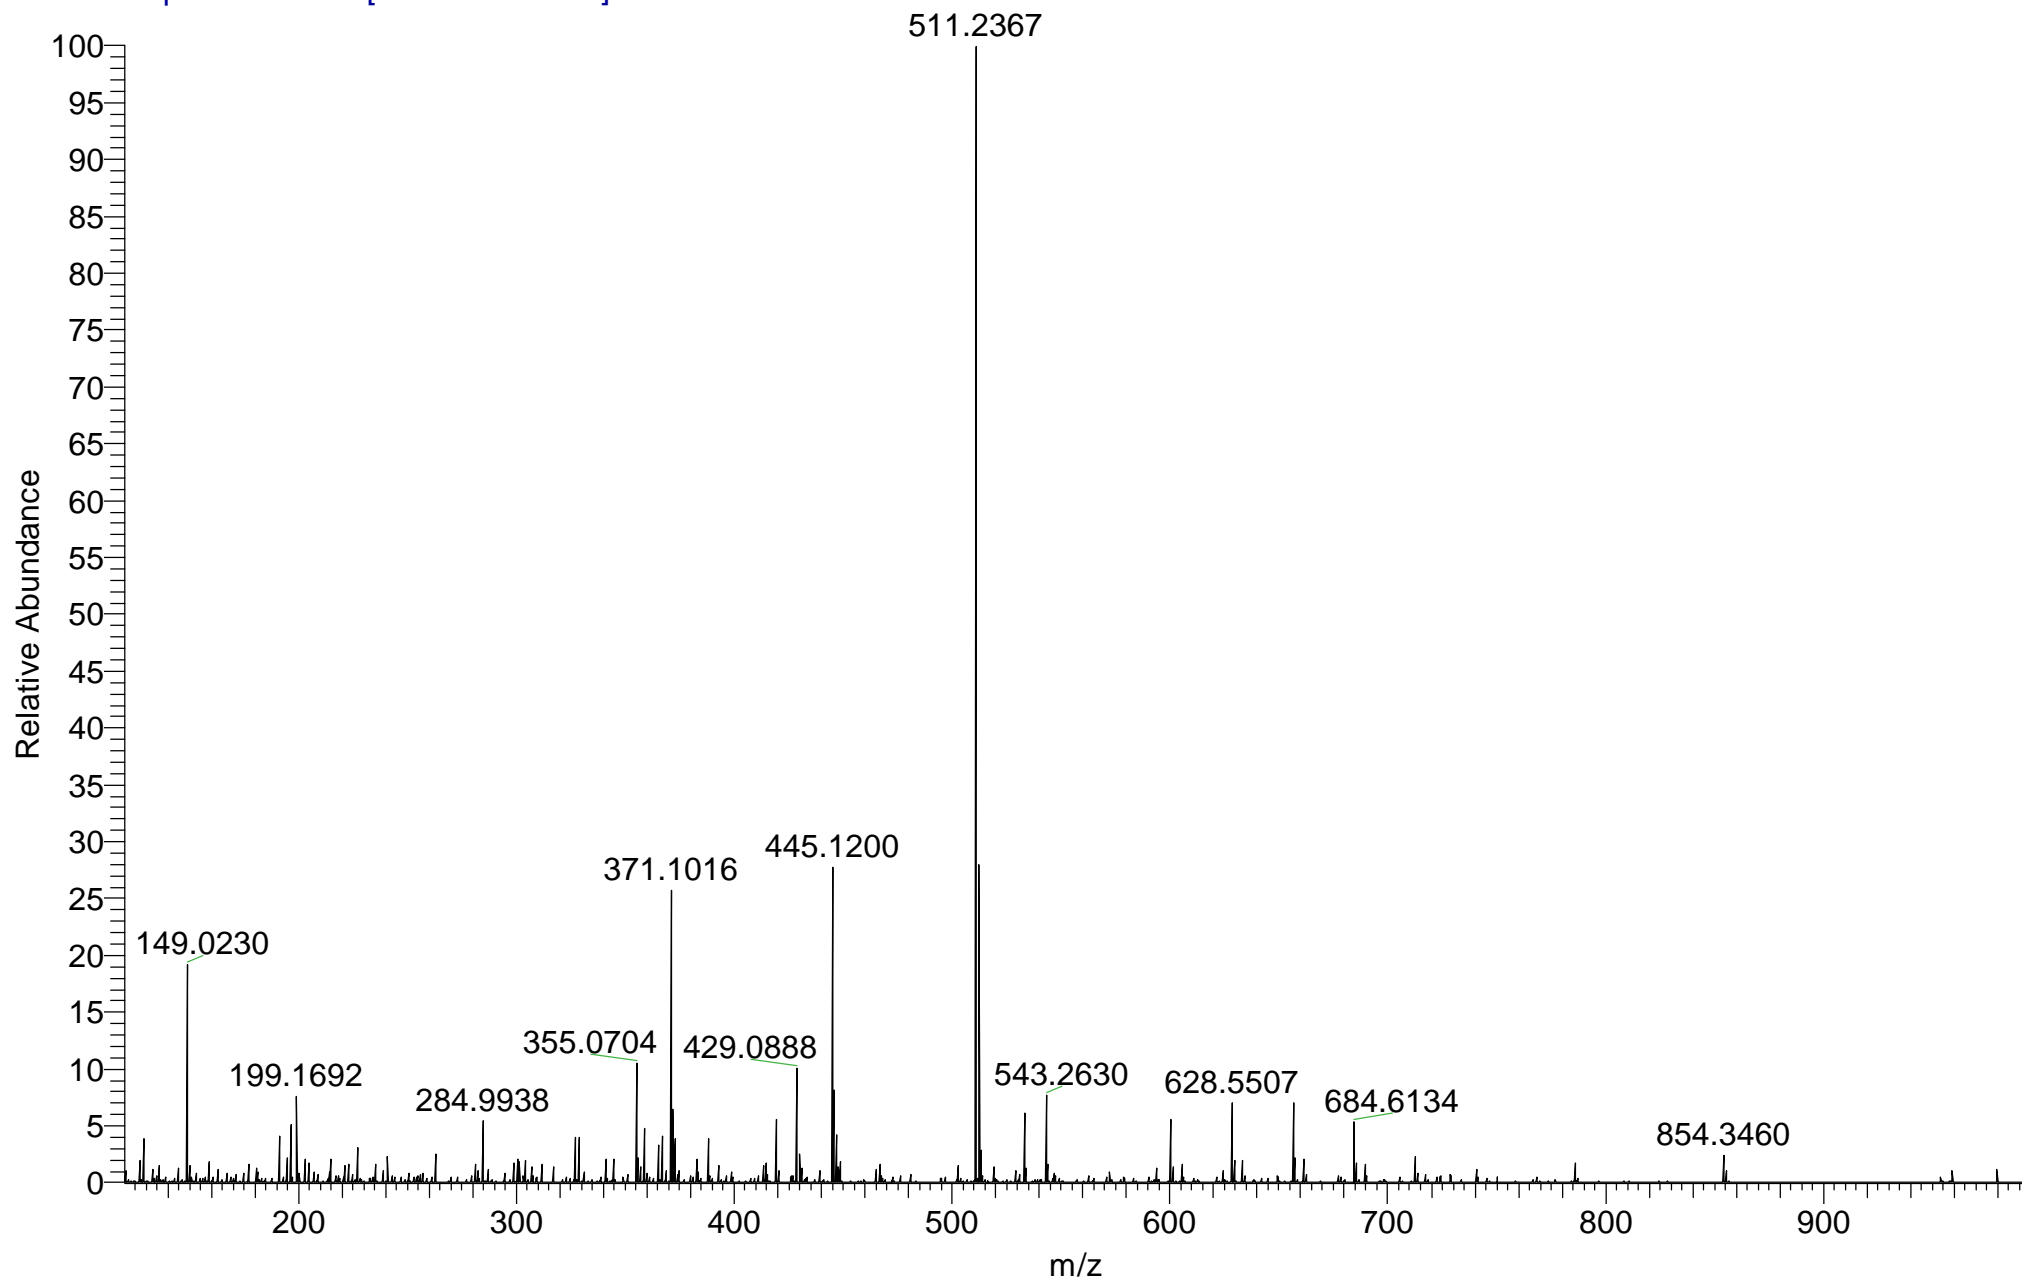

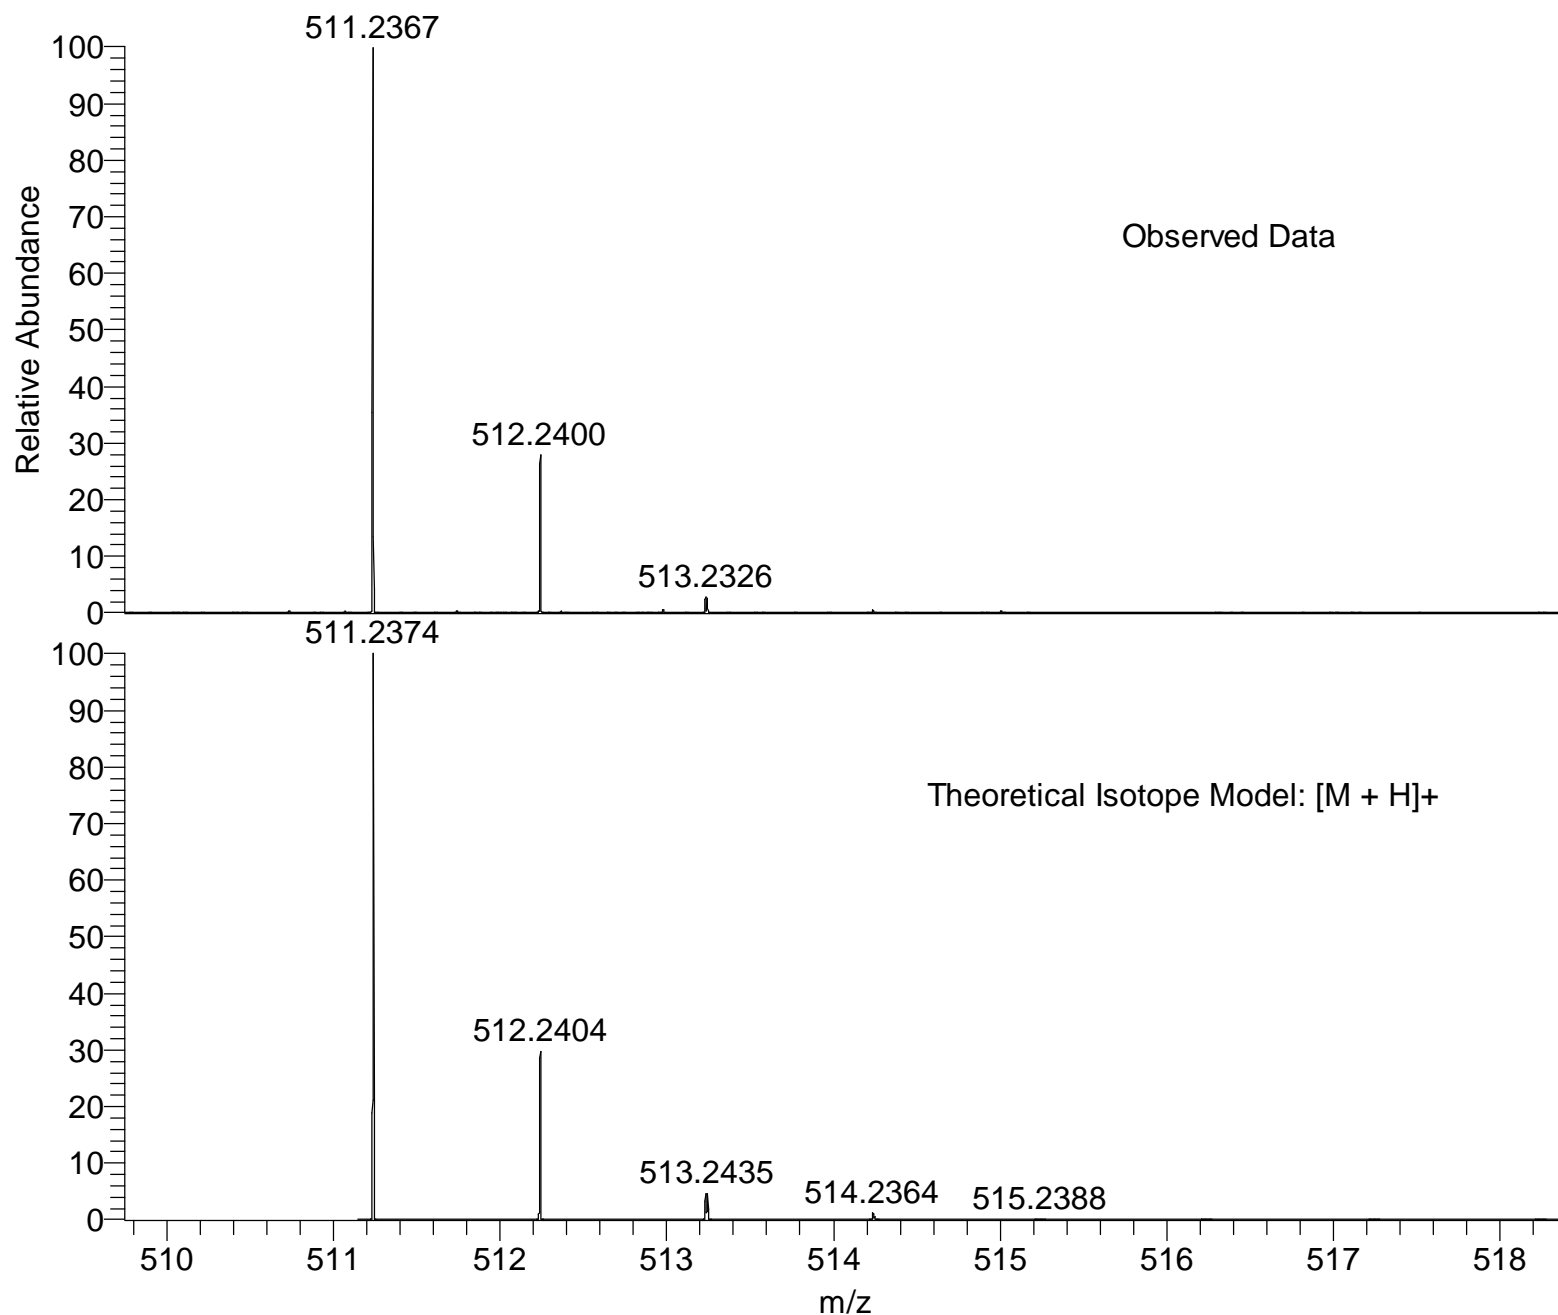

NL:  
4.81E5  
BRASHE224-OJ-HNESP#29-  
50 RT: 0.71-1.29 AV: 21 T:  
FTMS + p NSI Full ms  
[120.00-2000.00]

NL:  
1.62E4  
C<sub>27</sub> H<sub>34</sub> N<sub>4</sub> O<sub>4</sub> SH:  
C<sub>27</sub> H<sub>35</sub> N<sub>4</sub> O<sub>4</sub> S<sub>1</sub>  
p (gss, s /p:40) Chrg 1  
R: 100000 Res .Pwr . @FWHM

Isotope: Min. .. Max.  
 14 N 0....14  
 16 O 0....14  
 12 C 0....60  
 1 H 0....75  
 23 Na 0....0  
 32 S 0....4

Tolerance Window: +- 5.00 ppm  
 Db/Ring Equiv: -3.. 100 N-Rule: Do not use  
 Fits: 100 Charge: 1

| Mass     | Theoretical<br>Mass | Delta<br>[ppm] | RDB  | Composition                                                                   |
|----------|---------------------|----------------|------|-------------------------------------------------------------------------------|
| 511.2367 | 511.2367            | -0.0           | 3.5  | C <sub>19</sub> H <sub>39</sub> O <sub>6</sub> N <sub>6</sub> S <sub>2</sub>  |
|          | 511.2367            | 0.0            | 9.0  | C <sub>18</sub> H <sub>33</sub> O <sub>1</sub> N <sub>13</sub> S <sub>2</sub> |
|          | 511.2367            | 0.1            | 22.0 | C <sub>33</sub> H <sub>29</sub> O <sub>1</sub> N <sub>5</sub>                 |
|          | 511.2365            | 0.4            | 0.5  | C <sub>11</sub> H <sub>35</sub> O <sub>9</sub> N <sub>12</sub> S <sub>1</sub> |
|          | 511.2369            | -0.4           | 6.5  | C <sub>27</sub> H <sub>43</sub> O <sub>3</sub> S <sub>3</sub>                 |
|          | 511.2362            | 0.9            | -2.5 | C <sub>19</sub> H <sub>47</sub> O <sub>5</sub> N <sub>2</sub> S <sub>4</sub>  |
|          | 511.2372            | -0.9           | 9.5  | C <sub>19</sub> H <sub>31</sub> O <sub>7</sub> N <sub>10</sub>                |
|          | 511.2362            | 0.9            | 3.0  | C <sub>18</sub> H <sub>41</sub> N <sub>9</sub> S <sub>4</sub>                 |
|          | 511.2372            | -0.9           | 4.0  | C <sub>20</sub> H <sub>37</sub> O <sub>12</sub> N <sub>3</sub>                |
|          | 511.2362            | 1.0            | 16.0 | C <sub>33</sub> H <sub>37</sub> N <sub>1</sub> S <sub>2</sub>                 |
|          | 511.2374            | -1.3           | 12.5 | C <sub>27</sub> H <sub>35</sub> O <sub>4</sub> N <sub>4</sub> S <sub>1</sub>  |
|          | 511.2360            | 1.3            | 7.5  | C <sub>26</sub> H <sub>39</sub> O <sub>8</sub> S <sub>1</sub>                 |
|          | 511.2374            | -1.3           | -0.5 | C <sub>12</sub> H <sub>39</sub> O <sub>4</sub> N <sub>12</sub> S <sub>3</sub> |
|          | 511.2360            | 1.3            | 13.0 | C <sub>25</sub> H <sub>33</sub> O <sub>3</sub> N <sub>7</sub> S <sub>1</sub>  |
|          | 511.2358            | 1.7            | 4.5  | C <sub>18</sub> H <sub>35</sub> O <sub>11</sub> N <sub>6</sub>                |
|          | 511.2376            | -1.7           | 2.5  | C <sub>20</sub> H <sub>43</sub> O <sub>1</sub> N <sub>6</sub> S <sub>4</sub>  |
|          | 511.2358            | 1.7            | 10.0 | C <sub>17</sub> H <sub>29</sub> O <sub>6</sub> N <sub>13</sub>                |
|          | 511.2355            | 2.3            | 7.0  | C <sub>25</sub> H <sub>41</sub> O <sub>2</sub> N <sub>3</sub> S <sub>3</sub>  |
|          | 511.2379            | -2.3           | 0.0  | C <sub>13</sub> H <sub>37</sub> O <sub>10</sub> N <sub>9</sub> S <sub>1</sub> |
|          | 511.2380            | -2.6           | 21.5 | C <sub>35</sub> H <sub>31</sub> O <sub>2</sub> N <sub>2</sub>                 |
|          | 511.2354            | 2.6            | -1.5 | C <sub>18</sub> H <sub>43</sub> O <sub>10</sub> N <sub>2</sub> S <sub>2</sub> |
|          | 511.2380            | -2.6           | 8.5  | C <sub>20</sub> H <sub>35</sub> O <sub>2</sub> N <sub>10</sub> S <sub>2</sub> |
|          | 511.2354            | 2.6            | 4.0  | C <sub>17</sub> H <sub>37</sub> O <sub>5</sub> N <sub>9</sub> S <sub>2</sub>  |
|          | 511.2380            | -2.6           | 3.0  | C <sub>21</sub> H <sub>41</sub> O <sub>7</sub> N <sub>3</sub> S <sub>2</sub>  |
|          | 511.2353            | 2.7            | 17.0 | C <sub>32</sub> H <sub>33</sub> O <sub>5</sub> N <sub>1</sub>                 |
|          | 511.2353            | 2.7            | 22.5 | C <sub>31</sub> H <sub>27</sub> N <sub>8</sub>                                |
|          | 511.2385            | -3.5           | 14.5 | C <sub>20</sub> H <sub>27</sub> O <sub>3</sub> N <sub>14</sub>                |
|          | 511.2349            | 3.5            | -2.0 | C <sub>17</sub> H <sub>45</sub> O <sub>4</sub> N <sub>5</sub> S <sub>4</sub>  |
|          | 511.2385            | -3.5           | 9.0  | C <sub>21</sub> H <sub>33</sub> O <sub>8</sub> N <sub>7</sub>                 |
|          | 511.2385            | -3.6           | 3.5  | C <sub>22</sub> H <sub>39</sub> O <sub>13</sub>                               |
|          | 511.2387            | -3.9           | 17.5 | C <sub>28</sub> H <sub>31</sub> N <sub>8</sub> S <sub>1</sub>                 |

AET9-6 MW=329?  
ASAP(SOLID + NH4OAc)

# Compound 36

EPSRC National Centre Swansea  
LTQ Orbitrap XL

Throup  
06/11/2012 12:06:57

BRASHE233-PG-HASP #135-137 RT: 3.87-3.92 AV: 3 SM: 7G NL: 2.04E7  
T: FTMS + p APCI corona Full ms [100.00-800.00]

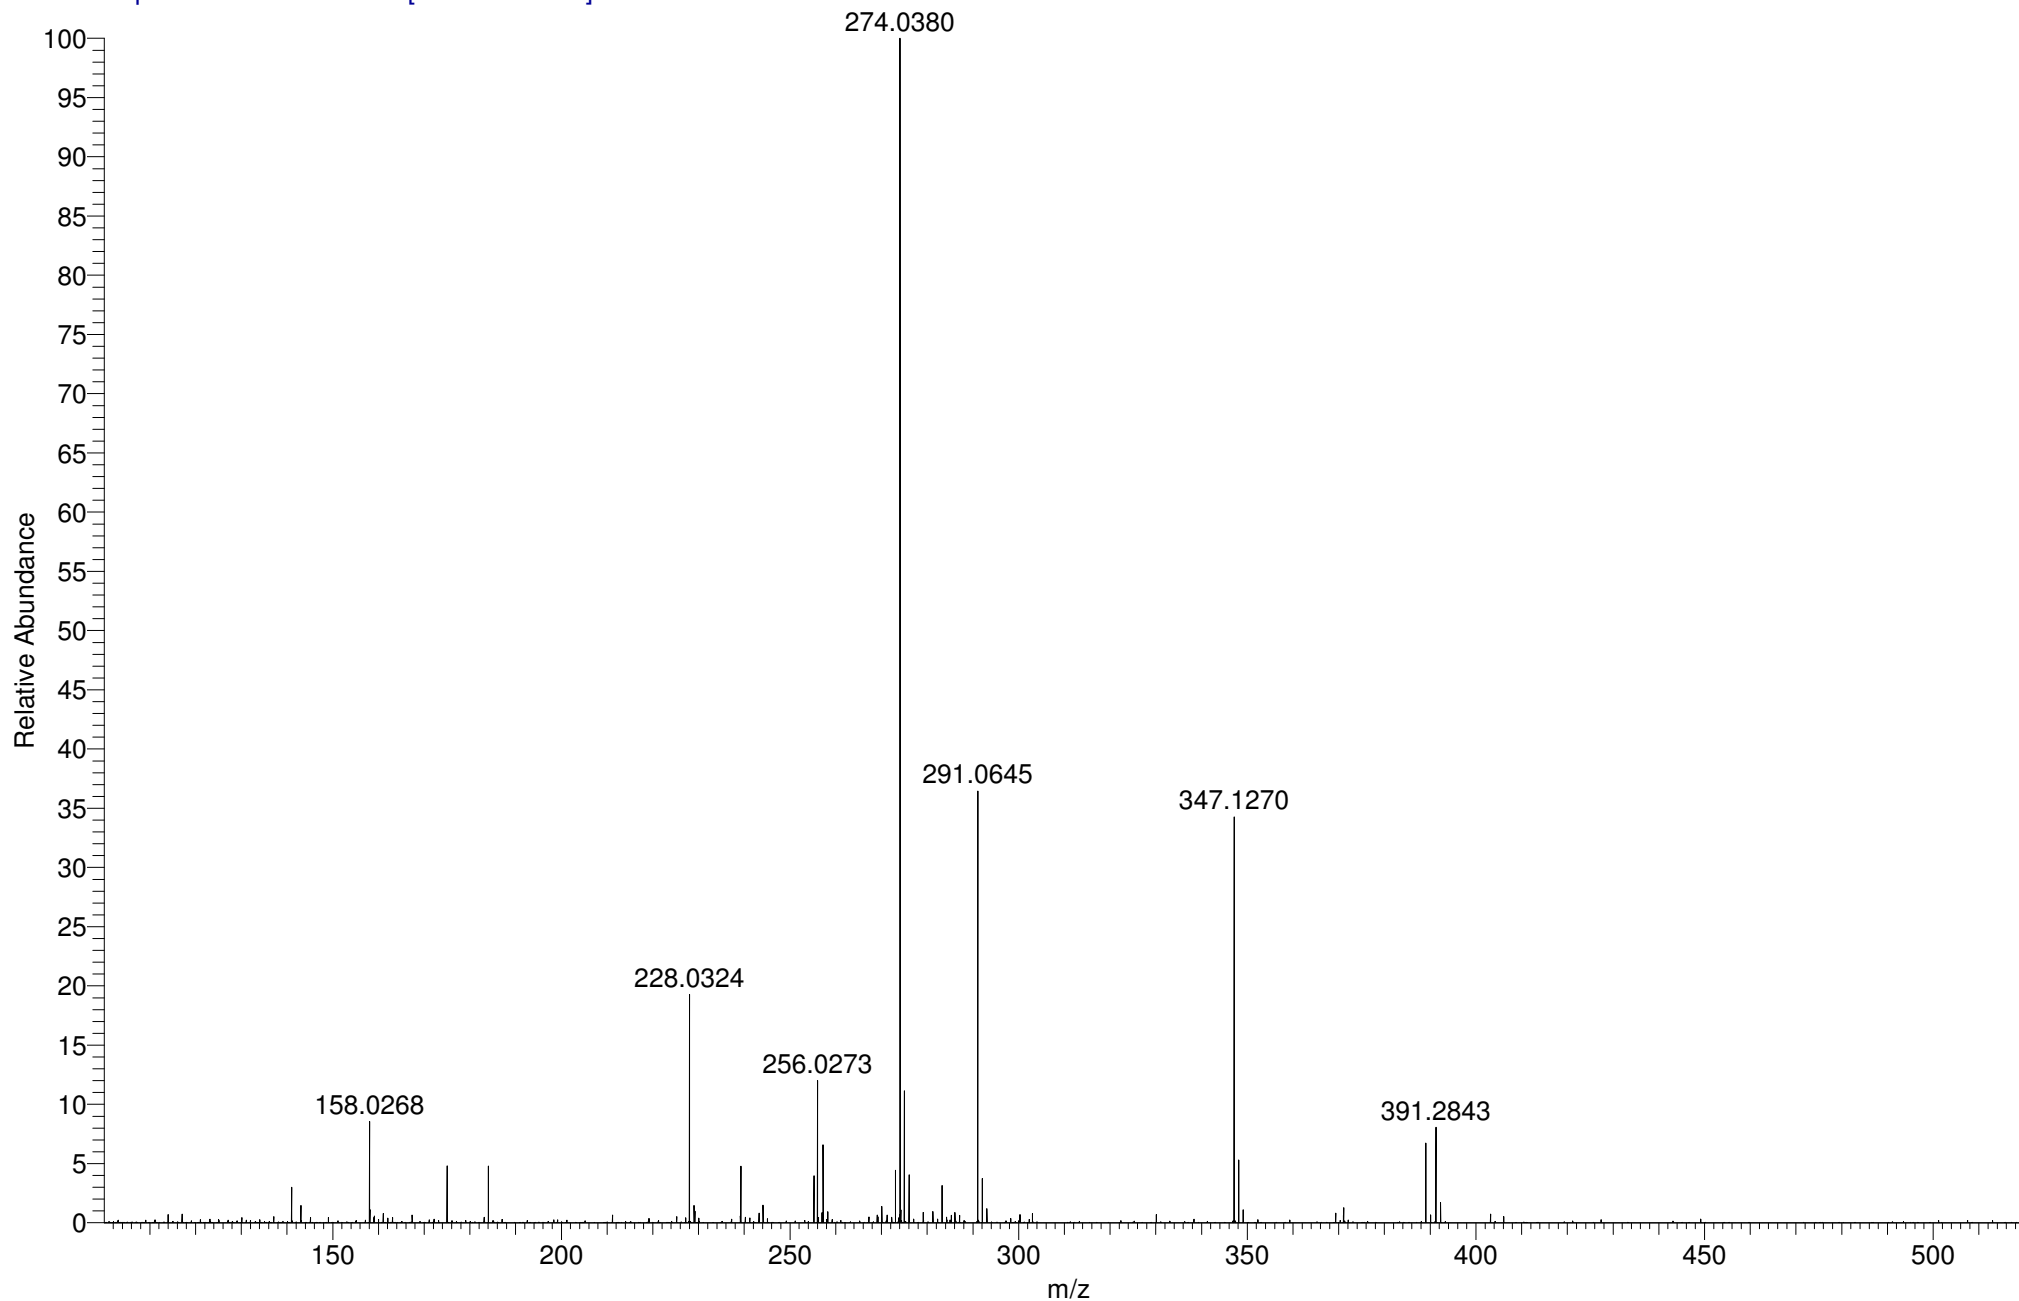



AET9-6 MW=329?  
ASAP(SOLID + NH4OAc)

EPSRC National Centre Swansea  
LTQ Orbitrap XL

Thrup  
06/11/2012 12:06:57

BRASHE233-PG-HASP #135-137 RT: 3.87-3.92 AV: 3 SM: 7G NL: 2.04E7  
T: FTMS + p APCI corona Full ms [100.00-800.00]

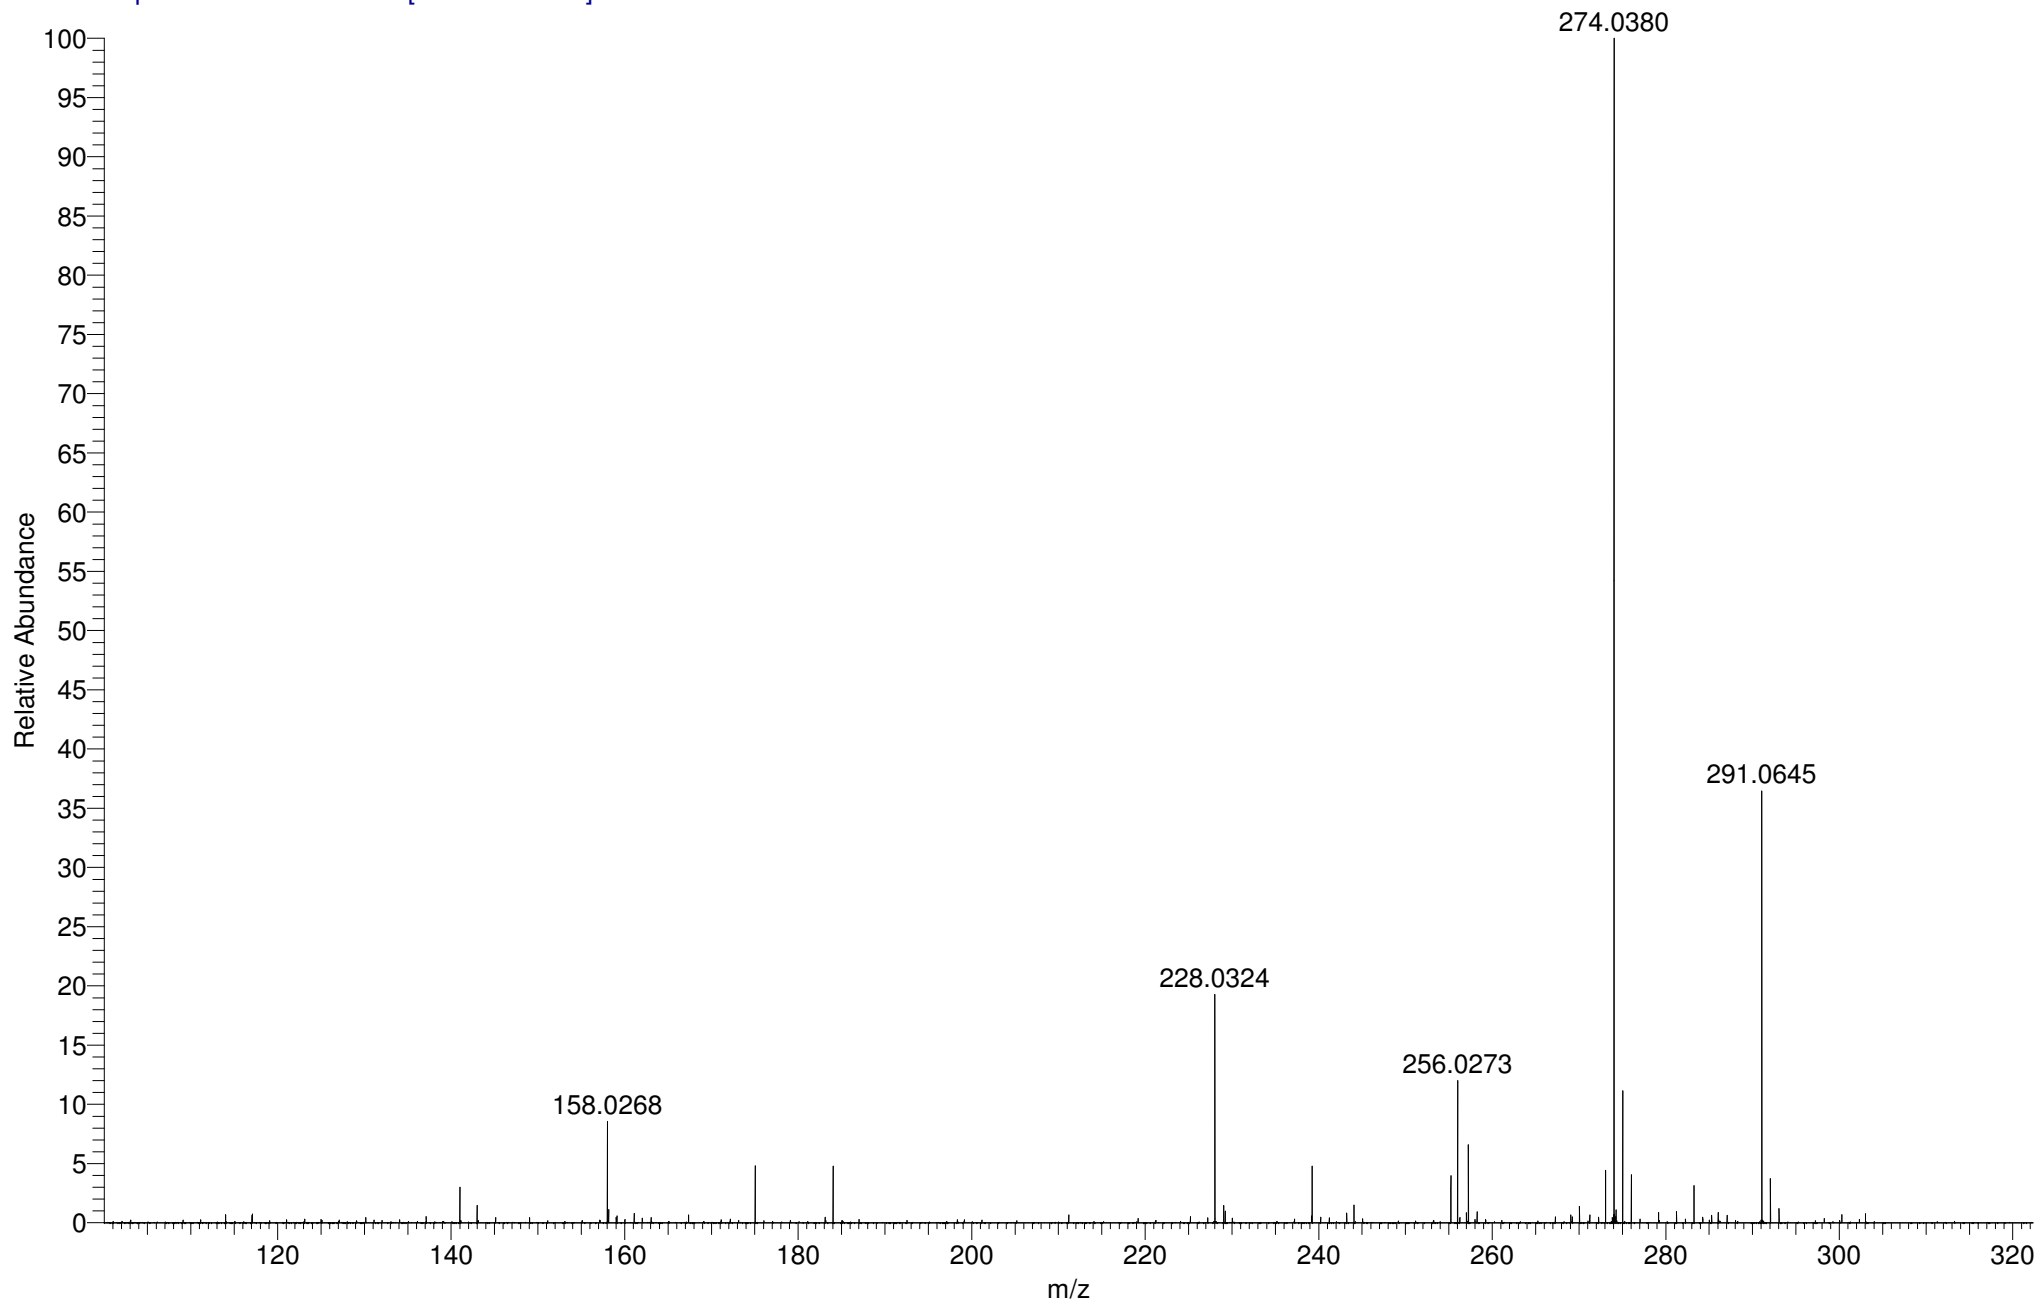

AET9-6 MW=329?  
ASAP(SOLID + NH4OAc)

EPSRC National Centre Swansea  
LTQ Orbitrap XL

Thrup  
06/11/2012 12:06:57

BRASHE233-PG-HASP #135-137 RT: 3.87-3.92 AV: 3 SM: 7G NL: 7.44E6  
T: FTMS + p APCI corona Full ms [100.00-800.00]

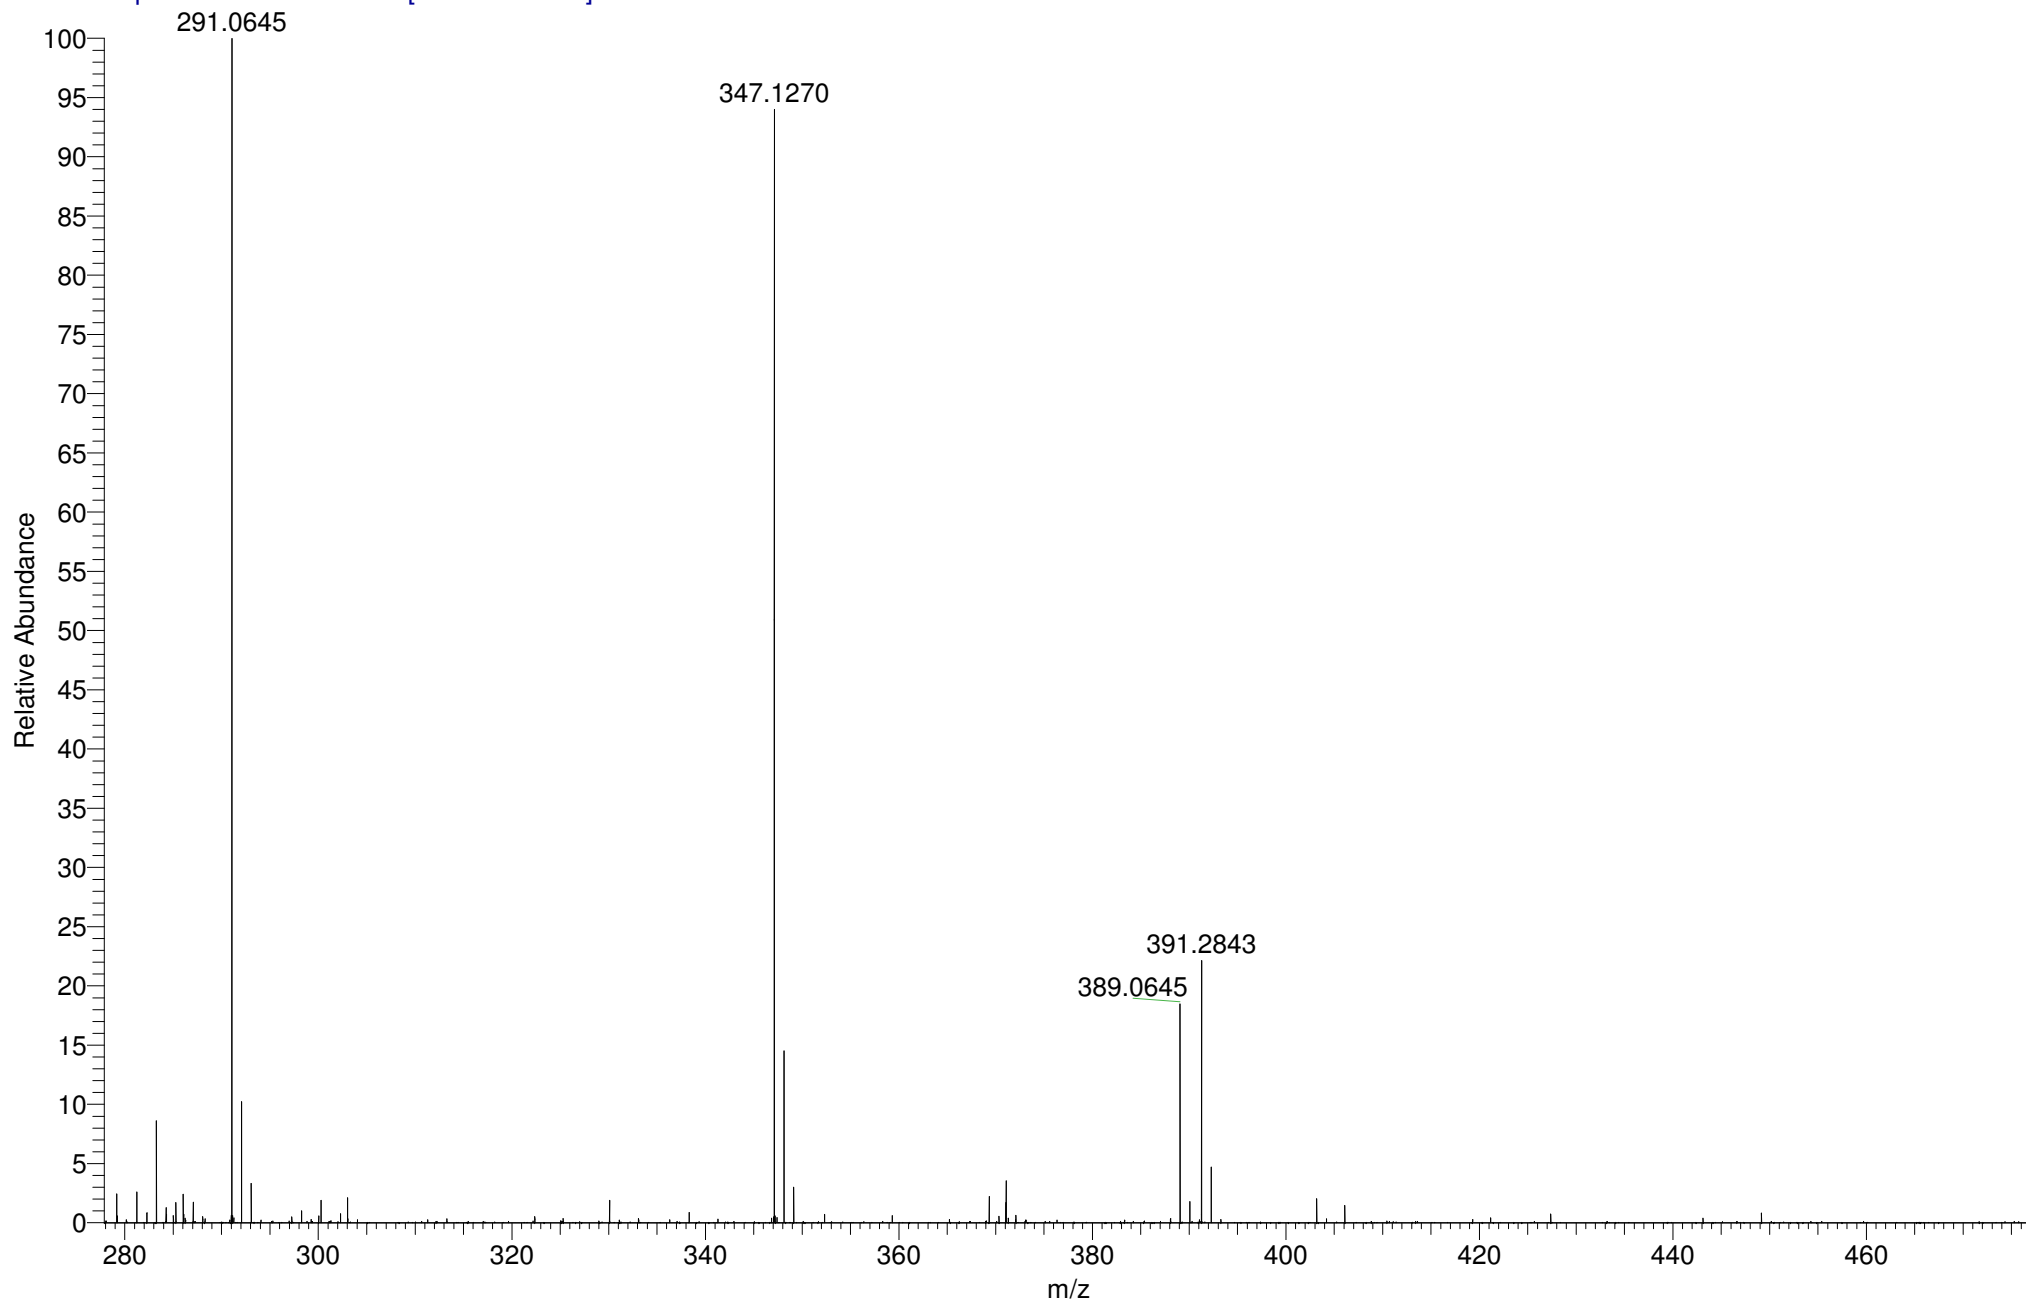

SM: 7G

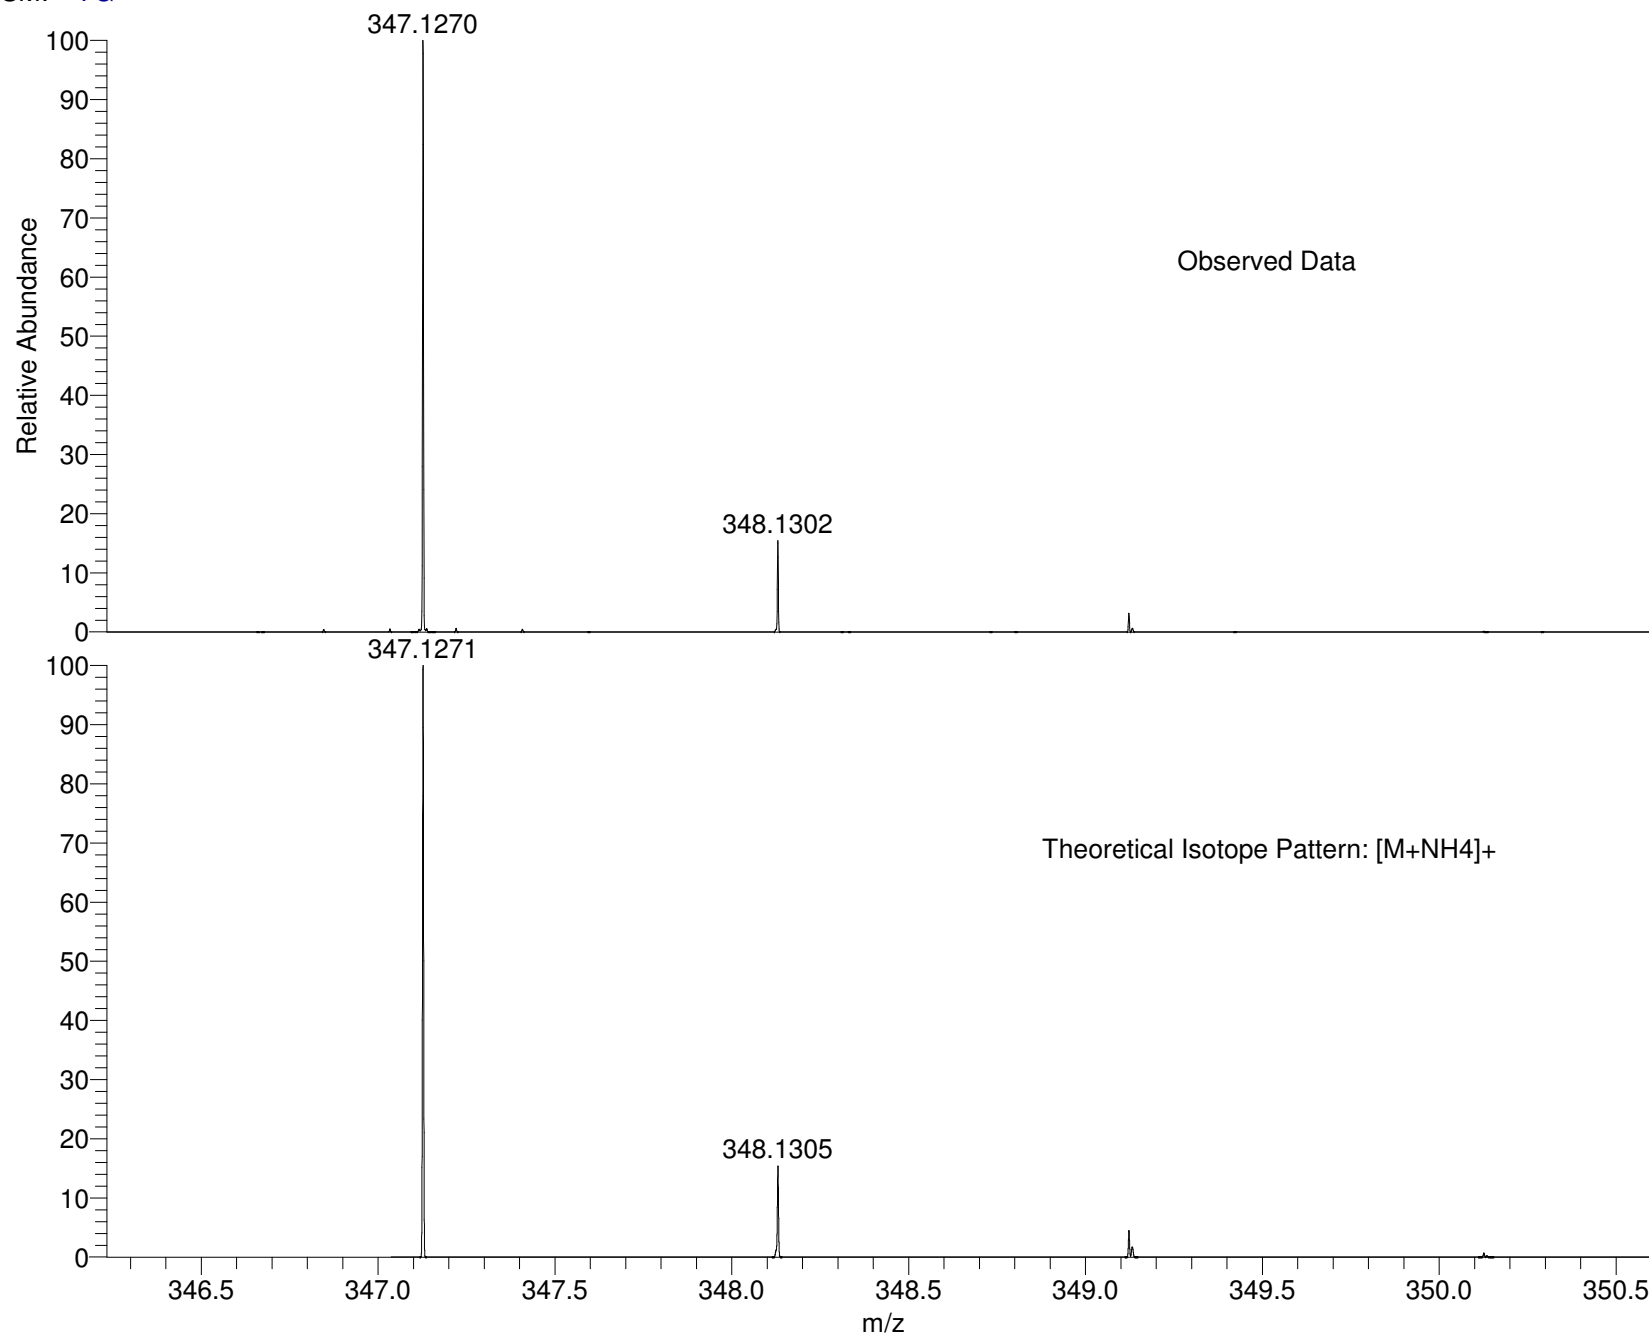

NL:  
7.00E6  
BRASHE233-PG-HASP#135-  
137 RT: 3.87-3.92 AV: 3 T:  
FTMS + p APCI corona Full ms  
[100.00-800.00]

NL:  
1.87E4  
C<sub>14</sub>H<sub>19</sub>NO<sub>6</sub>SNH<sub>4</sub>:  
C<sub>14</sub>H<sub>23</sub>N<sub>2</sub>O<sub>6</sub>S<sub>1</sub>  
p (gss, s /p:40) Chrg 1  
R: 100000 Res .Pwr . @FWHM

Isotope:           Min. .. Max.  
 14 N               0....16  
 16 O               0....15  
 12 C               0....80  
 1 H                0....100  
 23 Na              0....0  
 32 S               0....3  
 Tolerance Window: +- 5.00 ppm  
 Db/Ring Equiv:   -3.. 100  
 Fits:              100

N-Rule: Do not use  
 Charge: 1

| Mass     | Theoretical<br>Mass | Delta<br>[ppm] | RDB  | Composition                                                                  |
|----------|---------------------|----------------|------|------------------------------------------------------------------------------|
| 347.1270 | 347.1270            | 0.1            | 1.5  | C <sub>6</sub> H <sub>19</sub> O <sub>9</sub> N <sub>8</sub>                 |
|          | 347.1269            | 0.2            | 7.0  | C <sub>5</sub> H <sub>13</sub> O <sub>4</sub> N <sub>15</sub>                |
|          | 347.1271            | -0.4           | 10.0 | C <sub>13</sub> H <sub>17</sub> O <sub>1</sub> N <sub>9</sub> S <sub>1</sub> |
|          | 347.1271            | -0.4           | 4.5  | C <sub>14</sub> H <sub>23</sub> O <sub>6</sub> N <sub>2</sub> S <sub>1</sub> |
|          | 347.1267            | 1.0            | 4.0  | C <sub>13</sub> H <sub>25</sub> N <sub>5</sub> S <sub>3</sub>                |
|          | 347.1265            | 1.5            | 1.0  | C <sub>5</sub> H <sub>21</sub> O <sub>3</sub> N <sub>11</sub> S <sub>2</sub> |
|          | 347.1264            | 1.6            | 14.0 | C <sub>20</sub> H <sub>17</sub> O <sub>3</sub> N <sub>3</sub>                |
|          | 347.1278            | -2.3           | 13.5 | C <sub>22</sub> H <sub>19</sub> O <sub>4</sub>                               |
|          | 347.1278            | -2.4           | 0.5  | C <sub>7</sub> H <sub>23</sub> O <sub>4</sub> N <sub>8</sub> S <sub>2</sub>  |
|          | 347.1280            | -2.9           | 3.5  | C <sub>15</sub> H <sub>27</sub> O <sub>1</sub> N <sub>2</sub> S <sub>3</sub> |
|          | 347.1258            | 3.5            | 5.0  | C <sub>12</sub> H <sub>21</sub> O <sub>5</sub> N <sub>5</sub> S <sub>1</sub> |
|          | 347.1258            | 3.5            | 10.5 | C <sub>11</sub> H <sub>15</sub> N <sub>12</sub> S <sub>1</sub>               |
|          | 347.1283            | -3.7           | 6.5  | C <sub>7</sub> H <sub>15</sub> O <sub>5</sub> N <sub>12</sub>                |
|          | 347.1283            | -3.7           | 1.0  | C <sub>8</sub> H <sub>21</sub> O <sub>10</sub> N <sub>5</sub>                |
|          | 347.1256            | 4.0            | 2.0  | C <sub>4</sub> H <sub>17</sub> O <sub>8</sub> N <sub>11</sub>                |
|          | 347.1285            | -4.2           | 9.5  | C <sub>15</sub> H <sub>19</sub> O <sub>2</sub> N <sub>6</sub> S <sub>1</sub> |
|          | 347.1253            | 4.8            | -1.0 | C <sub>12</sub> H <sub>29</sub> O <sub>4</sub> N <sub>1</sub> S <sub>3</sub> |

# Compound 37

AET9-8 MW=538?  
ASAP(SOLID)

EPSRC National Centre Swansea  
LTQ Orbitrap XL

Throup  
06/11/2012 11:52:53

BRASHE231-PG-HASP #27-30 RT: 0.75-0.84 AV: 4 SM: 7G NL: 3.59E6  
T: FTMS + p APCI corona Full ms [100.00-800.00]

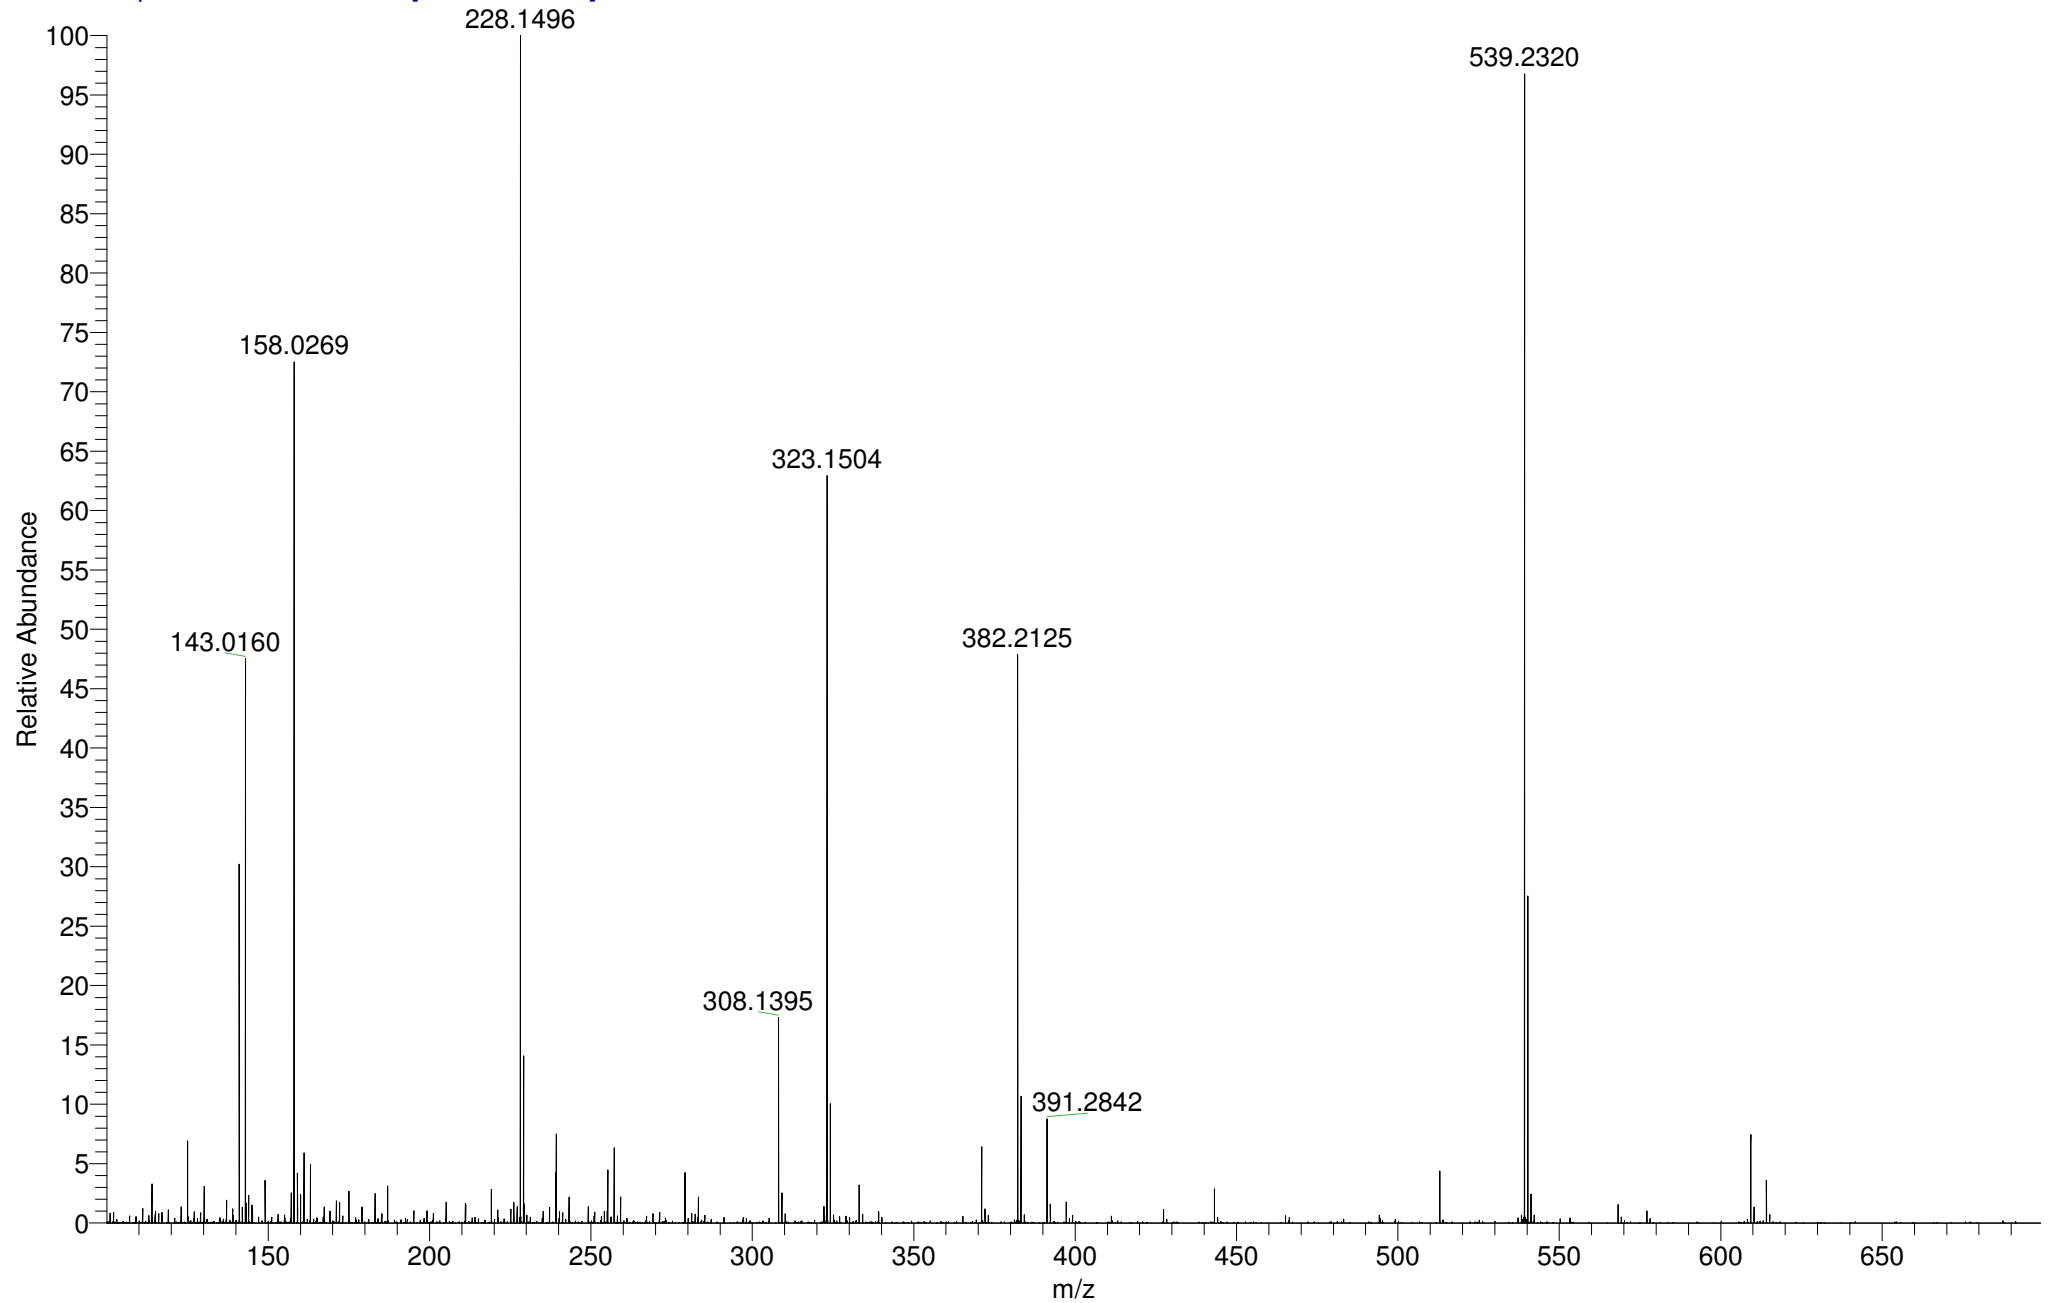

BRASHE231-PG-HASP #27-30 RT: 0.75-0.84 AV: 4 SM: 7G NL: 3.59E6  
T: FTMS + p APCI corona Full ms [100.00-800.00]

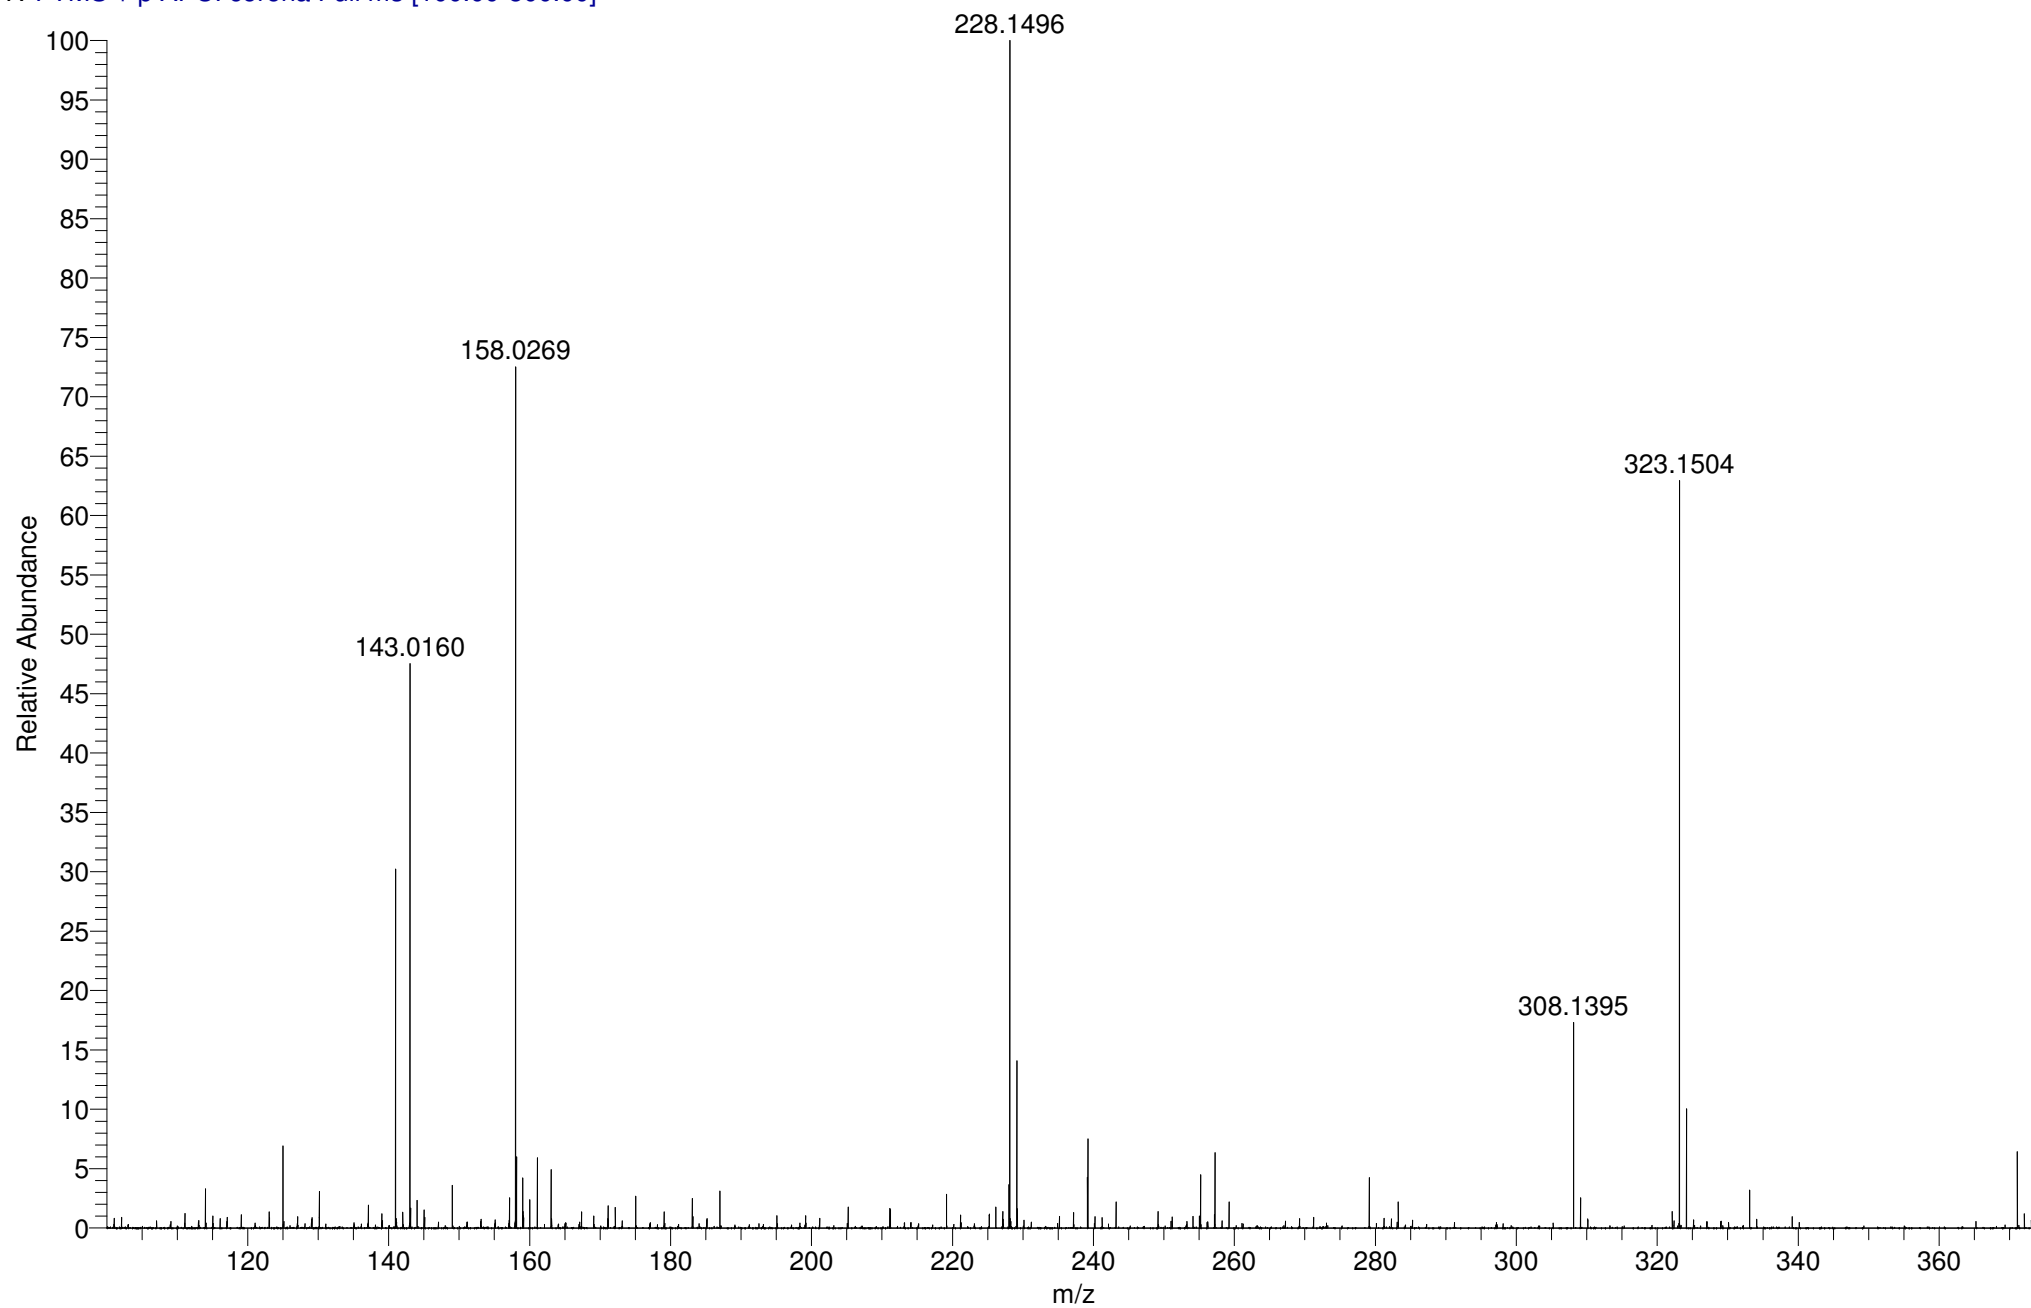

AET9-8 MW=538?  
ASAP(SOLID)

EPSRC National Centre Swansea  
LTQ Orbitrap XL

Thrup  
06/11/2012 11:52:53

BRASHE231-PG-HASP #27-30 RT: 0.75-0.84 AV: 4 SM: 7G NL: 3.47E6  
T: FTMS + p APCI corona Full ms [100.00-800.00]

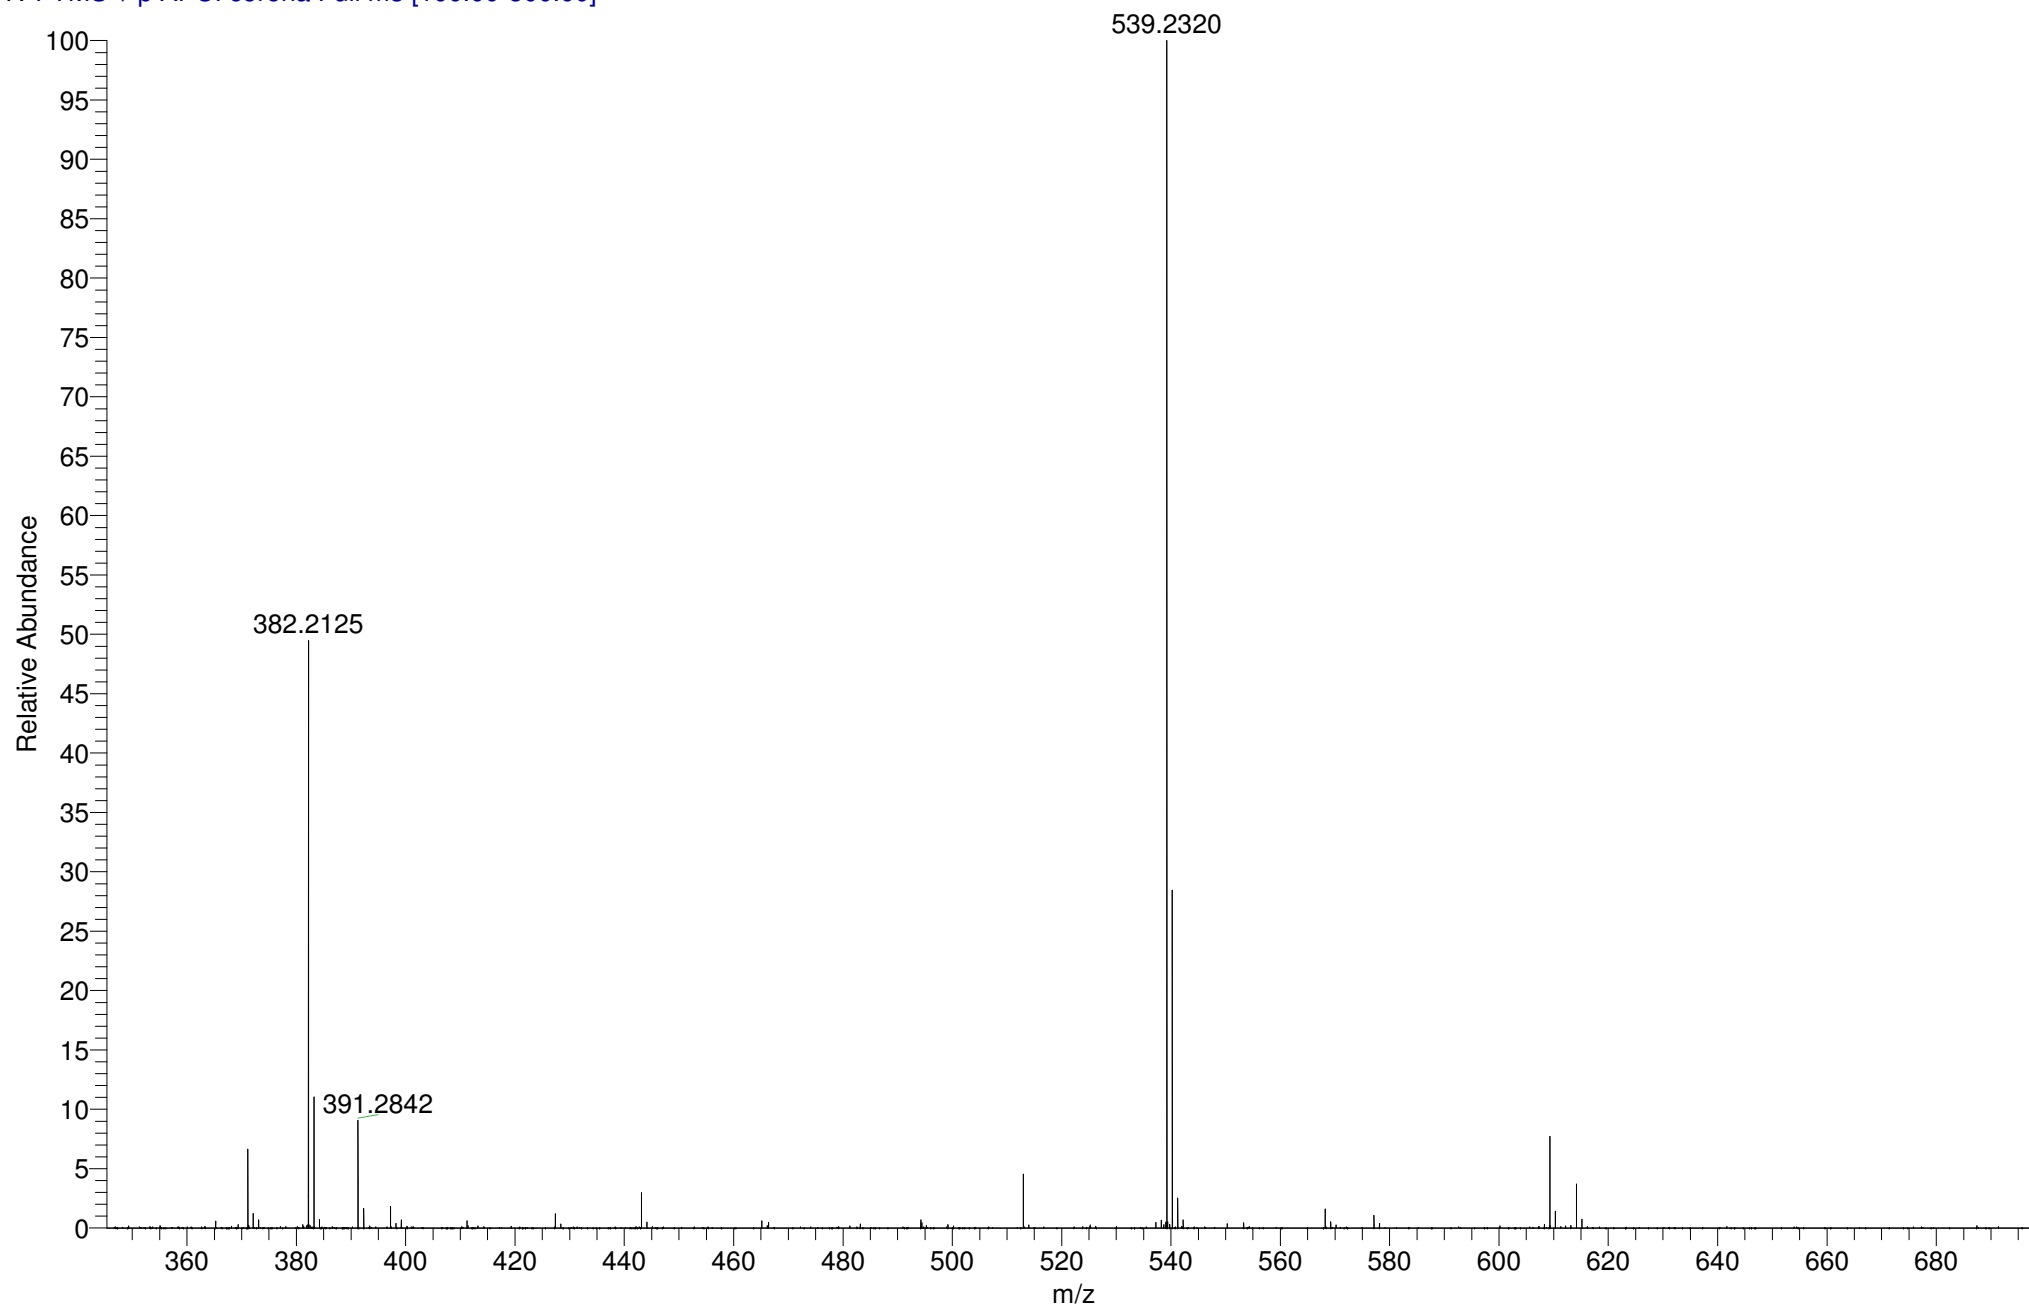

SM: 7G

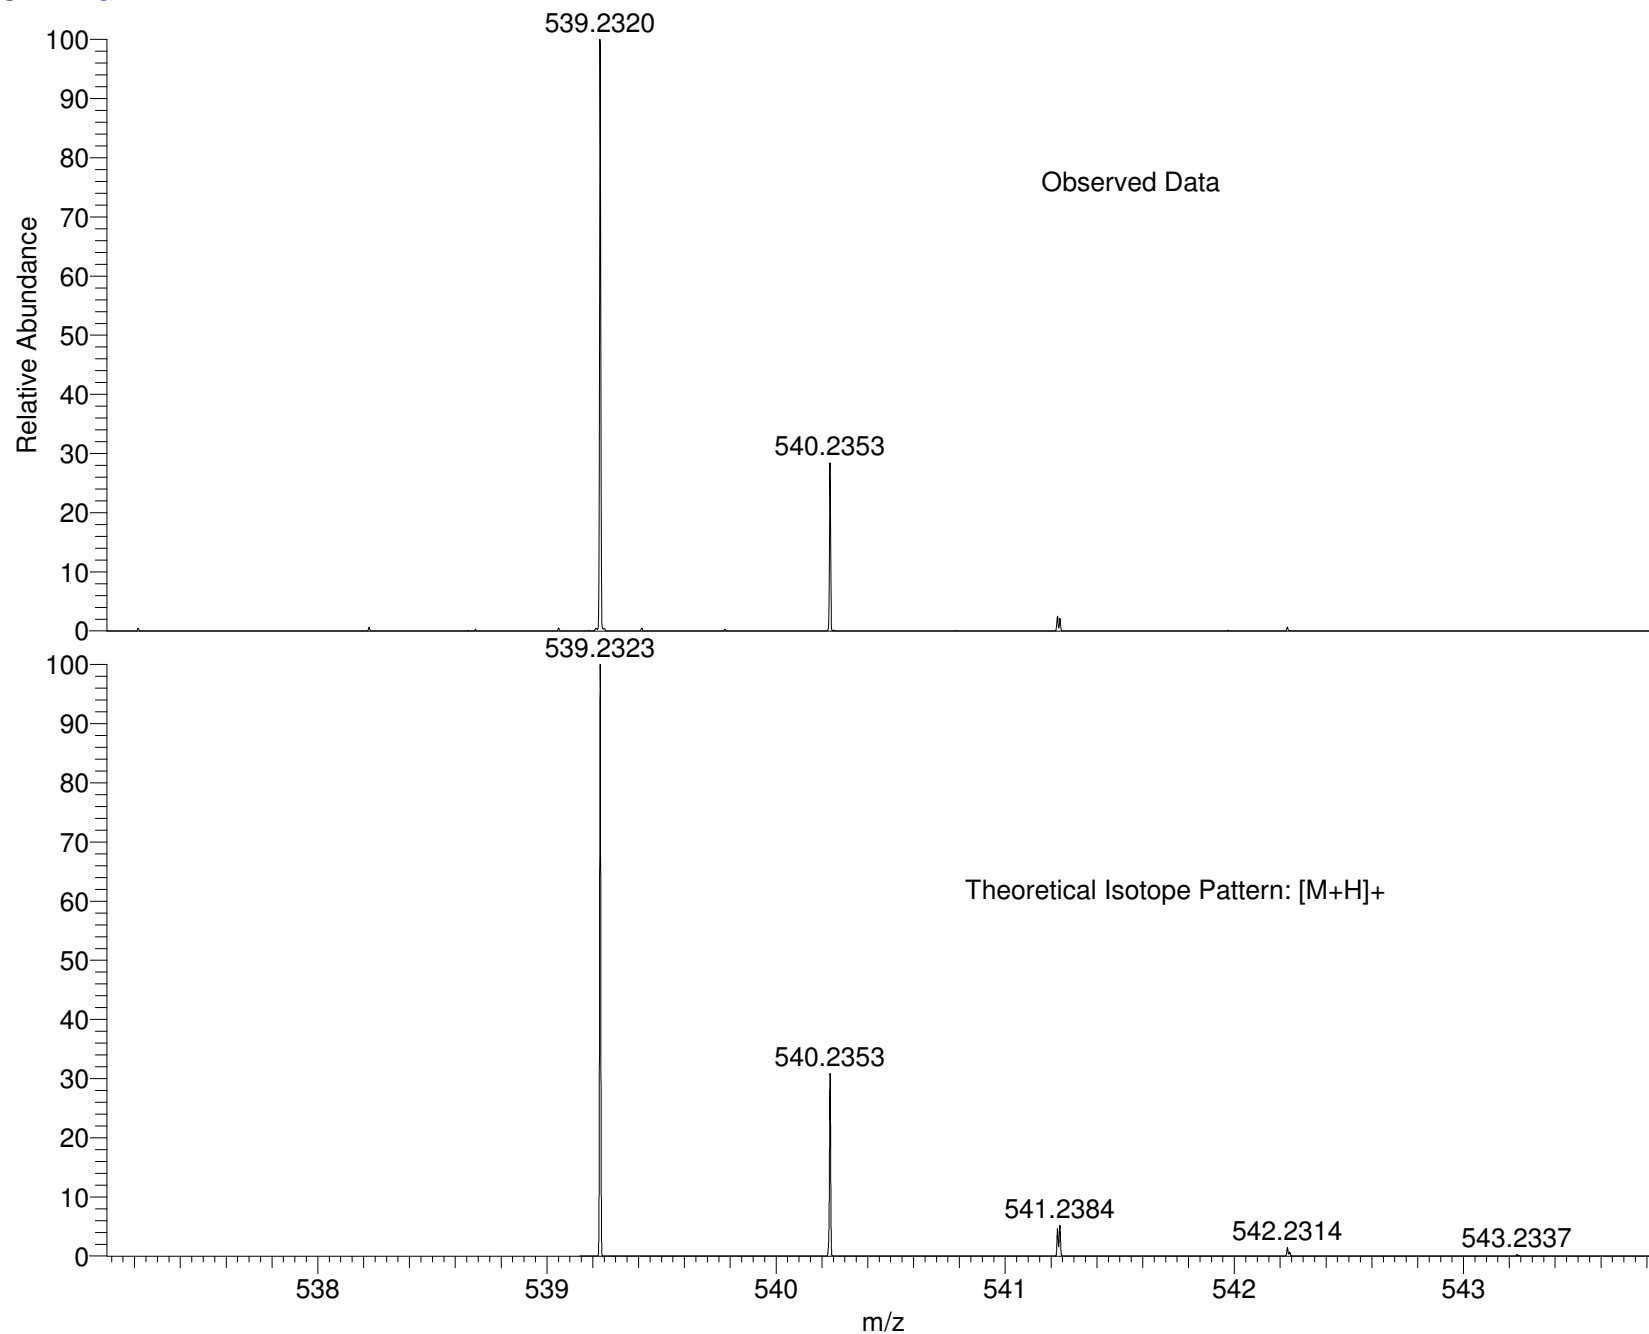

NL:  
3.47E6  
BRASHE231-PG-HASP#27-30  
RT: 0.75-0.84 AV: 4 T: FTMS  
+ p APCI corona Full ms  
[100.00-800.00]

NL:  
1.60E4  
C<sub>28</sub>H<sub>34</sub>N<sub>4</sub>O<sub>5</sub>SH:  
C<sub>28</sub>H<sub>35</sub>N<sub>4</sub>O<sub>5</sub>S<sub>1</sub>  
p (gss, s /p:40) Chrg 1  
R: 100000 Res .Pwr . @FWHM



Isotope:           Min. .. Max.  
 14 N               0....16  
 16 O               0....15  
 12 C               0....80  
 1 H                0....100  
 23 Na              0....0  
 32 S               0....3  
 Tolerance Window: +- 5.00 ppm  
 Db/Ring Equiv:   -3.. 100  
 Fits:              100

N-Rule: Do not use  
 Charge: 1

| Mass     | Theoretical<br>Mass | Delta<br>[ppm] | RDB  | Composition                                                                    |
|----------|---------------------|----------------|------|--------------------------------------------------------------------------------|
| 539.2320 | 539.2321            | -0.2           | 10.5 | C <sub>20</sub> H <sub>31</sub> O <sub>8</sub> N <sub>10</sub>                 |
|          | 539.2321            | -0.2           | 5.0  | C <sub>21</sub> H <sub>37</sub> O <sub>13</sub> N <sub>3</sub>                 |
|          | 539.2318            | 0.4            | 7.5  | C <sub>28</sub> H <sub>43</sub> O <sub>4</sub> S <sub>3</sub>                  |
|          | 539.2323            | -0.5           | 19.0 | C <sub>27</sub> H <sub>29</sub> N <sub>11</sub> S <sub>1</sub>                 |
|          | 539.2323            | -0.5           | 13.5 | C <sub>28</sub> H <sub>35</sub> O <sub>5</sub> N <sub>4</sub> S <sub>1</sub>   |
|          | 539.2323            | -0.6           | 0.5  | C <sub>13</sub> H <sub>39</sub> O <sub>5</sub> N <sub>12</sub> S <sub>3</sub>  |
|          | 539.2316            | 0.7            | 4.5  | C <sub>20</sub> H <sub>39</sub> O <sub>7</sub> N <sub>6</sub> S <sub>2</sub>   |
|          | 539.2316            | 0.7            | 10.0 | C <sub>19</sub> H <sub>33</sub> O <sub>2</sub> N <sub>13</sub> S <sub>2</sub>  |
|          | 539.2316            | 0.8            | 23.0 | C <sub>34</sub> H <sub>29</sub> O <sub>2</sub> N <sub>5</sub>                  |
|          | 539.2314            | 1.1            | 1.5  | C <sub>12</sub> H <sub>35</sub> O <sub>10</sub> N <sub>12</sub> S <sub>1</sub> |
|          | 539.2326            | -1.1           | -2.0 | C <sub>6</sub> H <sub>33</sub> O <sub>14</sub> N <sub>15</sub>                 |
|          | 539.2328            | -1.4           | 6.5  | C <sub>13</sub> H <sub>31</sub> O <sub>6</sub> N <sub>16</sub> S <sub>1</sub>  |
|          | 539.2328            | -1.4           | 1.0  | C <sub>14</sub> H <sub>37</sub> O <sub>11</sub> N <sub>9</sub> S <sub>1</sub>  |
|          | 539.2311            | 1.7            | 17.0 | C <sub>34</sub> H <sub>37</sub> O <sub>1</sub> N <sub>1</sub> S <sub>2</sub>   |
|          | 539.2329            | -1.7           | 22.5 | C <sub>34</sub> H <sub>31</sub> O <sub>3</sub> N <sub>2</sub>                  |
|          | 539.2330            | -1.8           | 9.5  | C <sub>21</sub> H <sub>35</sub> O <sub>3</sub> N <sub>10</sub> S <sub>2</sub>  |
|          | 539.2330            | -1.8           | 4.0  | C <sub>22</sub> H <sub>41</sub> O <sub>8</sub> N <sub>3</sub> S <sub>2</sub>   |
|          | 539.2310            | 1.9            | 1.0  | C <sub>11</sub> H <sub>37</sub> O <sub>4</sub> N <sub>15</sub> S <sub>3</sub>  |
|          | 539.2309            | 2.0            | 8.5  | C <sub>27</sub> H <sub>39</sub> O <sub>9</sub> S <sub>1</sub>                  |
|          | 539.2309            | 2.0            | 14.0 | C <sub>26</sub> H <sub>33</sub> O <sub>4</sub> N <sub>7</sub> S <sub>1</sub>   |
|          | 539.2331            | -2.1           | 12.5 | C <sub>29</sub> H <sub>39</sub> N <sub>4</sub> S <sub>3</sub>                  |
|          | 539.2307            | 2.3            | 5.5  | C <sub>19</sub> H <sub>35</sub> O <sub>12</sub> N <sub>6</sub>                 |
|          | 539.2307            | 2.3            | 11.0 | C <sub>18</sub> H <sub>29</sub> O <sub>7</sub> N <sub>13</sub>                 |
|          | 539.2334            | -2.6           | 15.5 | C <sub>21</sub> H <sub>27</sub> O <sub>4</sub> N <sub>14</sub>                 |
|          | 539.2334            | -2.6           | 10.0 | C <sub>22</sub> H <sub>33</sub> O <sub>9</sub> N <sub>7</sub>                  |
|          | 539.2334            | -2.7           | 4.5  | C <sub>23</sub> H <sub>39</sub> O <sub>14</sub>                                |
|          | 539.2335            | -2.7           | -3.0 | C <sub>7</sub> H <sub>37</sub> O <sub>9</sub> N <sub>15</sub> S <sub>2</sub>   |
|          | 539.2305            | 2.9            | 8.0  | C <sub>26</sub> H <sub>41</sub> O <sub>3</sub> N <sub>3</sub> S <sub>3</sub>   |
|          | 539.2336            | -3.0           | 18.5 | C <sub>29</sub> H <sub>31</sub> O <sub>1</sub> N <sub>8</sub> S <sub>1</sub>   |
|          | 539.2336            | -3.0           | 13.0 | C <sub>30</sub> H <sub>37</sub> O <sub>6</sub> N <sub>1</sub> S <sub>1</sub>   |
|          | 539.2336            | -3.0           | 5.5  | C <sub>14</sub> H <sub>35</sub> O <sub>1</sub> N <sub>16</sub> S <sub>3</sub>  |

| Mass     | Theoretical<br>Mass | Delta<br>[ppm] | RDB  | Composition                                                                   |
|----------|---------------------|----------------|------|-------------------------------------------------------------------------------|
| 539.2336 |                     | -3.0           | 0.0  | C <sub>15</sub> H <sub>41</sub> O <sub>6</sub> N <sub>9</sub> S <sub>3</sub>  |
| 539.2303 |                     | 3.2            | -0.5 | C <sub>19</sub> H <sub>43</sub> O <sub>11</sub> N <sub>2</sub> S <sub>2</sub> |
| 539.2303 |                     | 3.2            | 5.0  | C <sub>18</sub> H <sub>37</sub> O <sub>6</sub> N <sub>9</sub> S <sub>2</sub>  |
| 539.2303 |                     | 3.2            | 10.5 | C <sub>17</sub> H <sub>31</sub> O <sub>1</sub> N <sub>16</sub> S <sub>2</sub> |
| 539.2302 |                     | 3.3            | 18.0 | C <sub>33</sub> H <sub>33</sub> O <sub>6</sub> N <sub>1</sub>                 |
| 539.2302 |                     | 3.3            | 23.5 | C <sub>32</sub> H <sub>27</sub> O <sub>1</sub> N <sub>8</sub>                 |
| 539.2301 |                     | 3.5            | 2.0  | C <sub>10</sub> H <sub>33</sub> O <sub>9</sub> N <sub>15</sub> S <sub>1</sub> |
| 539.2339 |                     | -3.6           | -2.5 | C <sub>8</sub> H <sub>35</sub> O <sub>15</sub> N <sub>12</sub>                |
| 539.2341 |                     | -3.9           | 6.0  | C <sub>15</sub> H <sub>33</sub> O <sub>7</sub> N <sub>13</sub> S <sub>1</sub> |
| 539.2341 |                     | -3.9           | 0.5  | C <sub>16</sub> H <sub>39</sub> O <sub>12</sub> N <sub>6</sub> S <sub>1</sub> |
| 539.2298 |                     | 4.1            | 17.5 | C <sub>32</sub> H <sub>35</sub> N <sub>4</sub> S <sub>2</sub>                 |
| 539.2343 |                     | -4.3           | 9.0  | C <sub>23</sub> H <sub>37</sub> O <sub>4</sub> N <sub>7</sub> S <sub>2</sub>  |
| 539.2343 |                     | -4.3           | 3.5  | C <sub>24</sub> H <sub>43</sub> O <sub>9</sub> S <sub>2</sub>                 |
| 539.2296 |                     | 4.5            | 9.0  | C <sub>25</sub> H <sub>37</sub> O <sub>8</sub> N <sub>3</sub> S <sub>1</sub>  |
| 539.2296 |                     | 4.5            | 14.5 | C <sub>24</sub> H <sub>31</sub> O <sub>3</sub> N <sub>10</sub> S <sub>1</sub> |
| 539.2345 |                     | -4.6           | 12.0 | C <sub>31</sub> H <sub>41</sub> O <sub>1</sub> N <sub>1</sub> S <sub>3</sub>  |
| 539.2294 |                     | 4.8            | 6.0  | C <sub>17</sub> H <sub>33</sub> O <sub>11</sub> N <sub>9</sub>                |
| 539.2294 |                     | 4.8            | 11.5 | C <sub>16</sub> H <sub>27</sub> O <sub>6</sub> N <sub>16</sub>                |

AET9-12 MW=542?  
(DCM)/MeOH + NH4OAc

# Compound 39

EPSRC National Centre Swansea  
LTQ Orbitrap XL

adam throup  
06/11/2012 11:01:27

BRASHE230-OJ-HNESP #31-49 RT: 0.77-1.28 AV: 19 SM: 7G NL: 5.17E6  
T: FTMS + p NSI Full ms [120.00-2000.00]

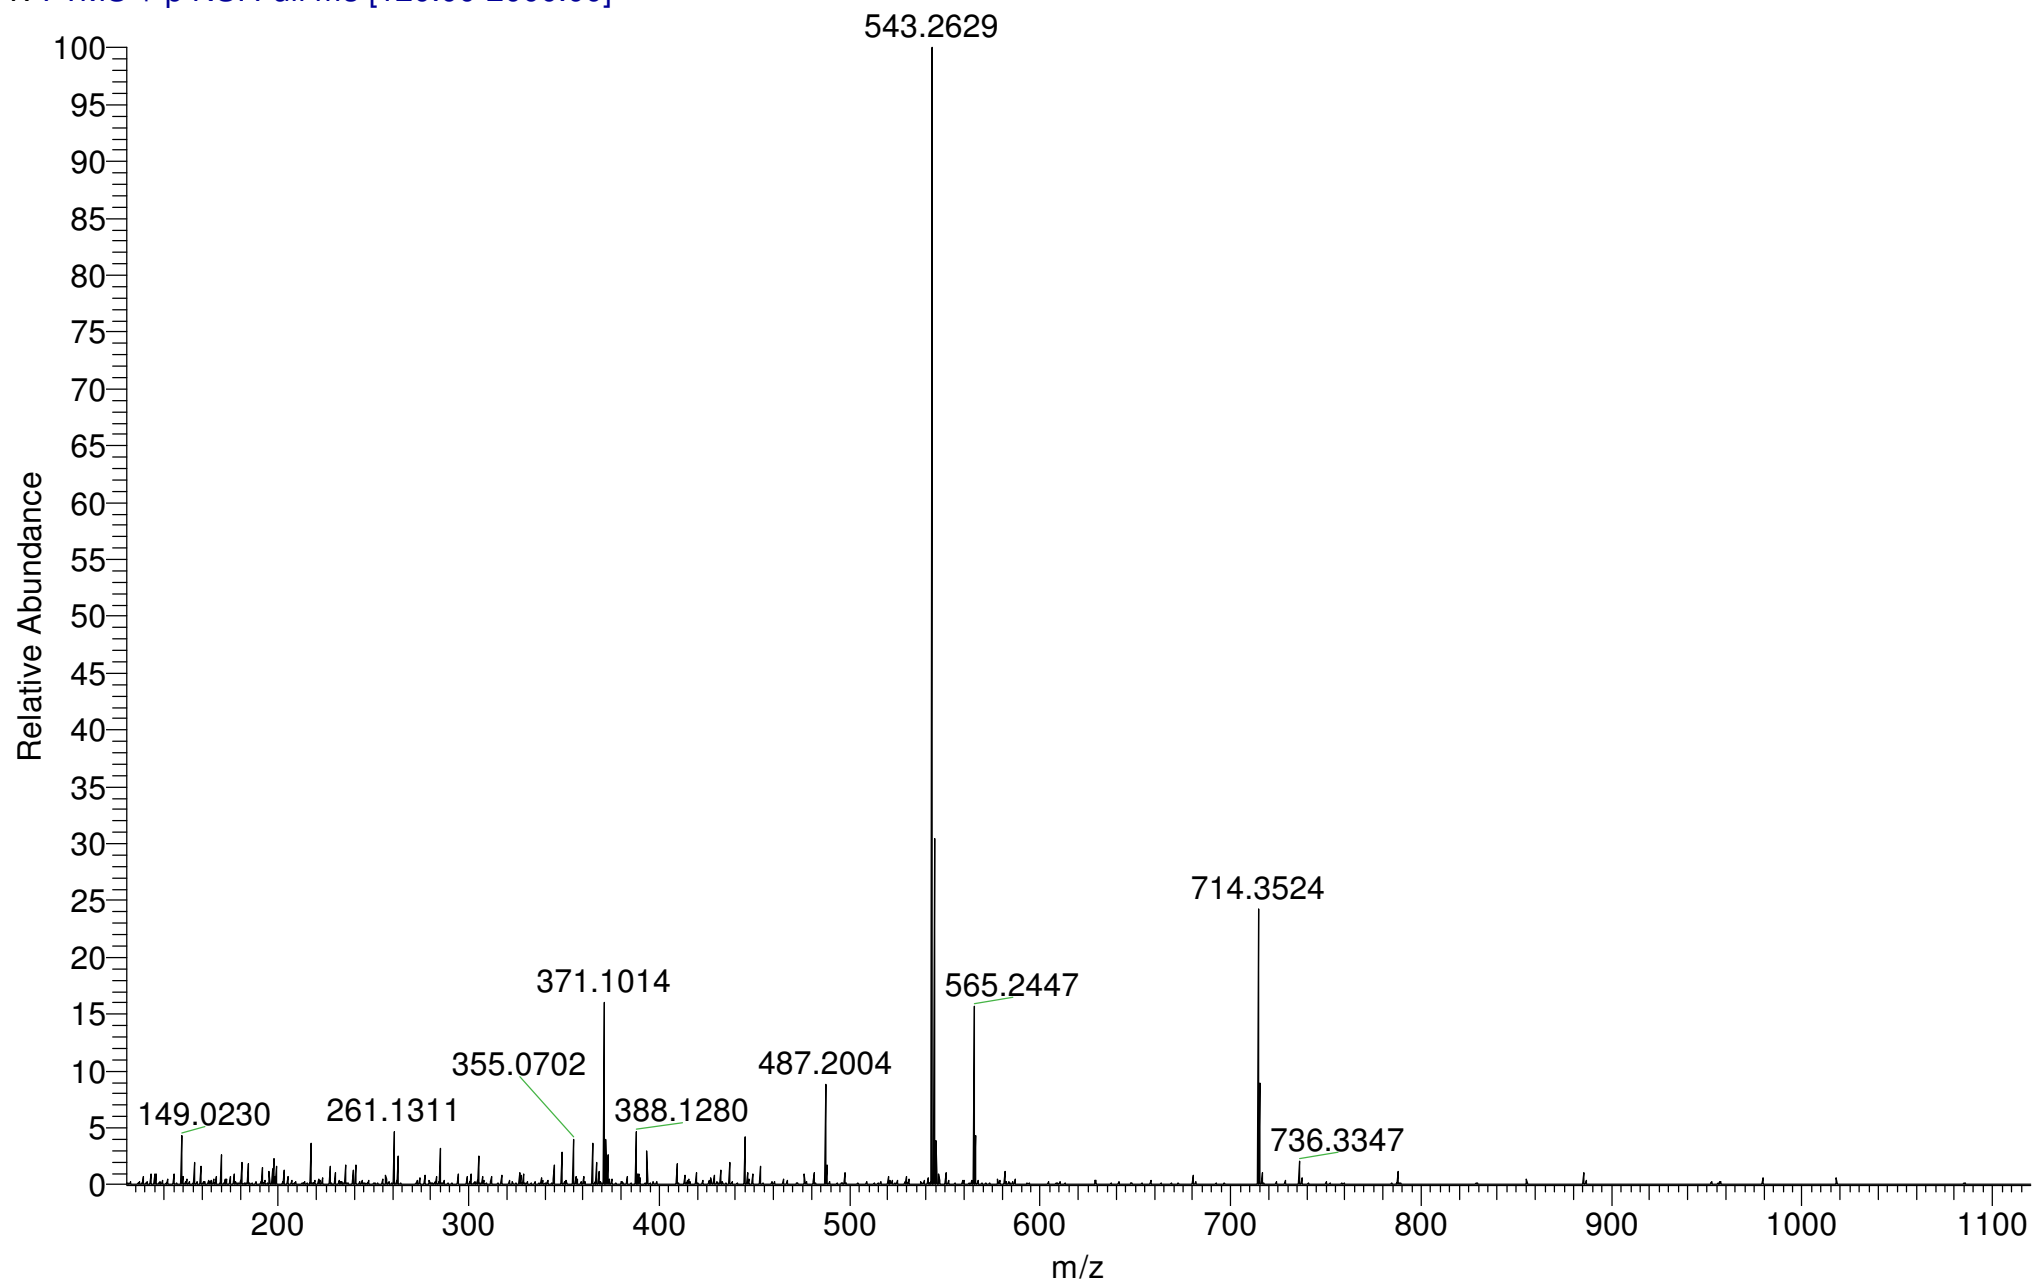

BRASHE230-OJ-HNESP #31-49 RT: 0.77-1.28 AV: 19 SM: 7G NL: 5.17E6

T: FTMS + p NSI Full ms [120.00-2000.00]

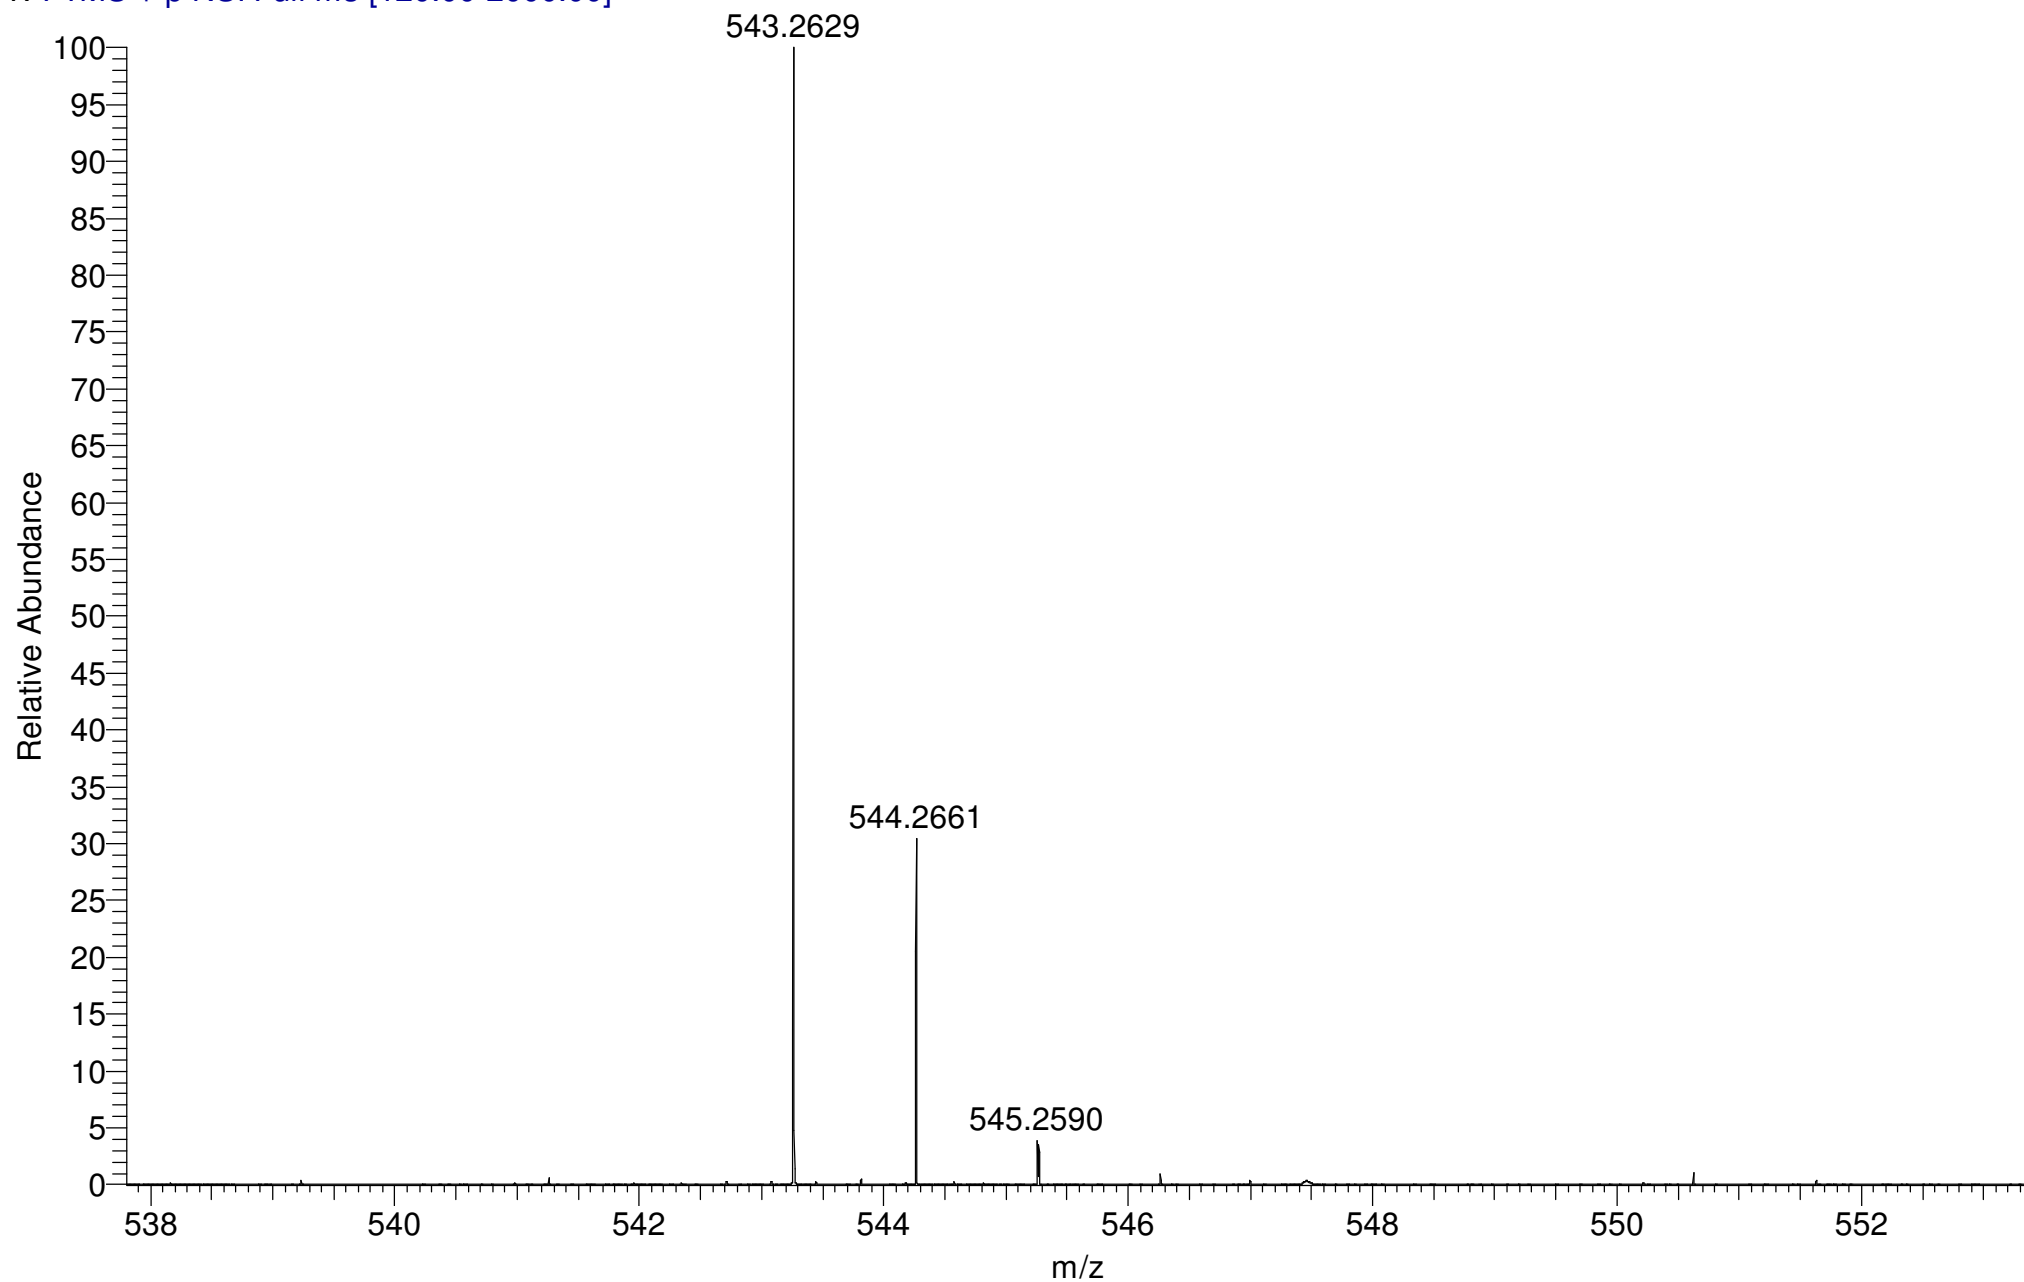

Isotope:           Min. .. Max.  
 12 C               0....60  
 1 H                0....70  
 14 N               0....15  
 16 O               0....15  
 23 Na              0....0  
 32 S               0....3  
 Tolerance Window: +- 5.00 ppm  
 Db/Ring Equiv:   -3.. 100  
 Fits:              100

N-Rule: Do not use  
 Charge: 1

| Mass     | Theoretical<br>Mass | Delta<br>[ppm] | RDB  | Composition                                                                    |
|----------|---------------------|----------------|------|--------------------------------------------------------------------------------|
| 543.2629 | 543.2629            | -0.0           | 8.0  | C <sub>19</sub> H <sub>37</sub> O <sub>2</sub> N <sub>13</sub> S <sub>2</sub>  |
|          | 543.2629            | -0.0           | 2.5  | C <sub>20</sub> H <sub>43</sub> O <sub>7</sub> N <sub>6</sub> S <sub>2</sub>   |
|          | 543.2629            | 0.0            | 21.0 | C <sub>34</sub> H <sub>33</sub> O <sub>2</sub> N <sub>5</sub>                  |
|          | 543.2627            | 0.3            | -0.5 | C <sub>12</sub> H <sub>39</sub> O <sub>10</sub> N <sub>12</sub> S <sub>1</sub> |
|          | 543.2631            | -0.4           | 5.5  | C <sub>28</sub> H <sub>47</sub> O <sub>4</sub> S <sub>3</sub>                  |
|          | 543.2634            | -0.9           | 8.5  | C <sub>20</sub> H <sub>35</sub> O <sub>8</sub> N <sub>10</sub>                 |
|          | 543.2634            | -0.9           | 3.0  | C <sub>21</sub> H <sub>41</sub> O <sub>13</sub> N <sub>3</sub>                 |
|          | 543.2624            | 0.9            | 15.0 | C <sub>34</sub> H <sub>41</sub> O <sub>1</sub> N <sub>1</sub> S <sub>2</sub>   |
|          | 543.2623            | 1.2            | -1.0 | C <sub>11</sub> H <sub>41</sub> O <sub>4</sub> N <sub>15</sub> S <sub>3</sub>  |
|          | 543.2636            | -1.2           | 17.0 | C <sub>27</sub> H <sub>33</sub> N <sub>11</sub> S <sub>1</sub>                 |
|          | 543.2636            | -1.2           | 11.5 | C <sub>28</sub> H <sub>39</sub> O <sub>5</sub> N <sub>4</sub> S <sub>1</sub>   |
|          | 543.2622            | 1.2            | 6.5  | C <sub>27</sub> H <sub>43</sub> O <sub>9</sub> S <sub>1</sub>                  |
|          | 543.2622            | 1.2            | 12.0 | C <sub>26</sub> H <sub>37</sub> O <sub>4</sub> N <sub>7</sub> S <sub>1</sub>   |
|          | 543.2636            | -1.3           | -1.5 | C <sub>13</sub> H <sub>43</sub> O <sub>5</sub> N <sub>12</sub> S <sub>3</sub>  |
|          | 543.2620            | 1.6            | 3.5  | C <sub>19</sub> H <sub>39</sub> O <sub>12</sub> N <sub>6</sub>                 |
|          | 543.2620            | 1.6            | 9.0  | C <sub>18</sub> H <sub>33</sub> O <sub>7</sub> N <sub>13</sub>                 |
|          | 543.2618            | 2.1            | 6.0  | C <sub>26</sub> H <sub>45</sub> O <sub>3</sub> N <sub>3</sub> S <sub>3</sub>   |
|          | 543.2641            | -2.2           | -1.0 | C <sub>14</sub> H <sub>41</sub> O <sub>11</sub> N <sub>9</sub> S <sub>1</sub>  |
|          | 543.2642            | -2.4           | 20.5 | C <sub>36</sub> H <sub>35</sub> O <sub>3</sub> N <sub>2</sub>                  |
|          | 543.2616            | 2.4            | -2.5 | C <sub>19</sub> H <sub>47</sub> O <sub>11</sub> N <sub>2</sub> S <sub>2</sub>  |
|          | 543.2616            | 2.4            | 3.0  | C <sub>18</sub> H <sub>41</sub> O <sub>6</sub> N <sub>9</sub> S <sub>2</sub>   |
|          | 543.2643            | -2.5           | 7.5  | C <sub>21</sub> H <sub>39</sub> O <sub>3</sub> N <sub>10</sub> S <sub>2</sub>  |
|          | 543.2643            | -2.5           | 2.0  | C <sub>22</sub> H <sub>45</sub> O <sub>8</sub> N <sub>3</sub> S <sub>2</sub>   |
|          | 543.2615            | 2.5            | 16.0 | C <sub>33</sub> H <sub>37</sub> O <sub>6</sub> N <sub>1</sub>                  |
|          | 543.2615            | 2.5            | 21.5 | C <sub>32</sub> H <sub>31</sub> O <sub>1</sub> N <sub>8</sub>                  |
|          | 543.2614            | 2.8            | 0.0  | C <sub>10</sub> H <sub>37</sub> O <sub>9</sub> N <sub>15</sub> S <sub>1</sub>  |
|          | 543.2644            | -2.8           | 10.5 | C <sub>29</sub> H <sub>43</sub> N <sub>4</sub> S <sub>3</sub>                  |
|          | 543.2647            | -3.4           | 13.5 | C <sub>21</sub> H <sub>31</sub> O <sub>4</sub> N <sub>14</sub>                 |
|          | 543.2647            | -3.4           | 8.0  | C <sub>22</sub> H <sub>37</sub> O <sub>9</sub> N <sub>7</sub>                  |
|          | 543.2647            | -3.4           | 2.5  | C <sub>23</sub> H <sub>43</sub> O <sub>14</sub>                                |
|          | 543.2611            | 3.4            | 15.5 | C <sub>32</sub> H <sub>39</sub> N <sub>4</sub> S <sub>2</sub>                  |

| Mass     | Theoretical<br>Mass | Delta<br>[ppm] | RDB  | Composition                                                                   |
|----------|---------------------|----------------|------|-------------------------------------------------------------------------------|
| 543.2649 | 543.2649            | -3.7           | 16.5 | C <sub>29</sub> H <sub>35</sub> O <sub>1</sub> N <sub>8</sub> S <sub>1</sub>  |
| 543.2649 | 543.2649            | -3.7           | 11.0 | C <sub>30</sub> H <sub>41</sub> O <sub>6</sub> N <sub>1</sub> S <sub>1</sub>  |
| 543.2609 | 543.2609            | 3.7            | 7.0  | C <sub>25</sub> H <sub>41</sub> O <sub>8</sub> N <sub>3</sub> S <sub>1</sub>  |
| 543.2609 | 543.2609            | 3.7            | 12.5 | C <sub>24</sub> H <sub>35</sub> O <sub>3</sub> N <sub>10</sub> S <sub>1</sub> |
| 543.2649 | 543.2649            | -3.8           | -2.0 | C <sub>15</sub> H <sub>45</sub> O <sub>6</sub> N <sub>9</sub> S <sub>3</sub>  |
| 543.2607 | 543.2607            | 4.0            | 4.0  | C <sub>17</sub> H <sub>37</sub> O <sub>11</sub> N <sub>9</sub>                |
| 543.2604 | 543.2604            | 4.6            | 6.5  | C <sub>24</sub> H <sub>43</sub> O <sub>2</sub> N <sub>6</sub> S <sub>3</sub>  |
| 543.2654 | 543.2654            | -4.6           | 4.0  | C <sub>15</sub> H <sub>37</sub> O <sub>7</sub> N <sub>13</sub> S <sub>1</sub> |
| 543.2654 | 543.2654            | -4.6           | -1.5 | C <sub>16</sub> H <sub>43</sub> O <sub>12</sub> N <sub>6</sub> S <sub>1</sub> |
| 543.2602 | 543.2602            | 4.9            | -2.0 | C <sub>17</sub> H <sub>45</sub> O <sub>10</sub> N <sub>5</sub> S <sub>2</sub> |
| 543.2602 | 543.2602            | 4.9            | 3.5  | C <sub>16</sub> H <sub>39</sub> O <sub>5</sub> N <sub>12</sub> S <sub>2</sub> |
| 543.2656 | 543.2656            | -5.0           | 7.0  | C <sub>23</sub> H <sub>41</sub> O <sub>4</sub> N <sub>7</sub> S <sub>2</sub>  |
| 543.2656 | 543.2656            | -5.0           | 1.5  | C <sub>24</sub> H <sub>47</sub> O <sub>9</sub> S <sub>2</sub>                 |
| 543.2602 | 543.2602            | 5.0            | 16.5 | C <sub>31</sub> H <sub>35</sub> O <sub>5</sub> N <sub>4</sub>                 |
| 543.2602 | 543.2602            | 5.0            | 22.0 | C <sub>30</sub> H <sub>29</sub> N <sub>11</sub>                               |

15-177-a  
(DCM)/MeOH + NH4OAc  
C15H20N2O3

# Compound 46

EPSRC National Facility Swansea  
LTQ Orbitrap XL

BRASHE  
23/01/2017 11:34:10

BRASHE\_0U5ZN\_#6-12 RT: 0.11-0.37 AV: 6 SM: 7G NL: 3.59E6  
T: FTMS + p NSI Full ms [120.00-1935.00]

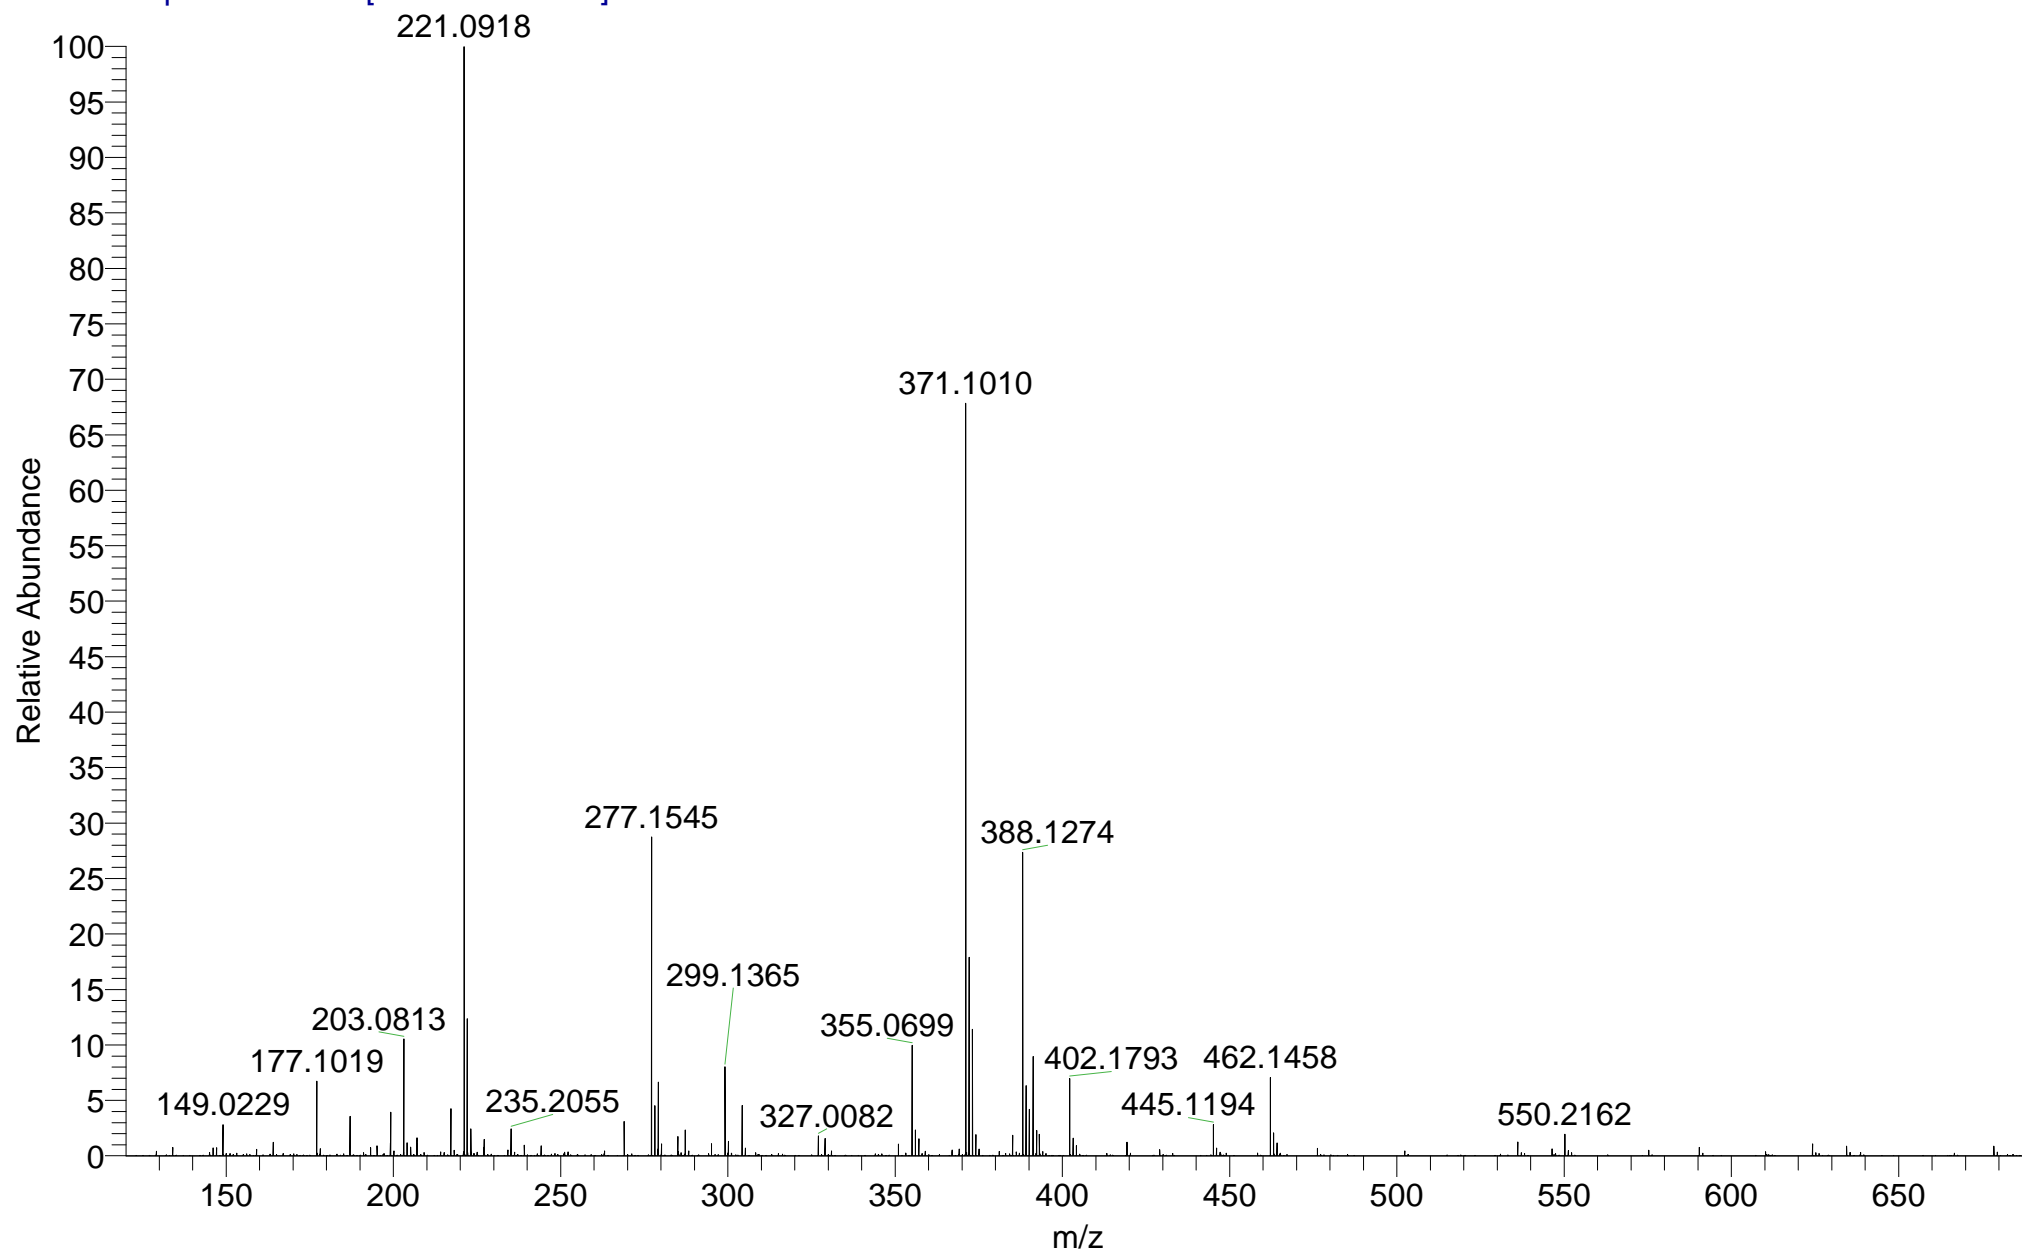

15-177-a  
(DCM)/MeOH + NH4OAc  
C15H20N2O3

EPSRC National Facility Swansea  
LTQ Orbitrap XL

BRASHE  
23/01/2017 11:34:10

BRASHE\_0U5ZN\_#6-12 RT: 0.11-0.37 AV: 6 SM: 7G NL: 3.59E6  
T: FTMS + p NSI Full ms [120.00-1935.00]

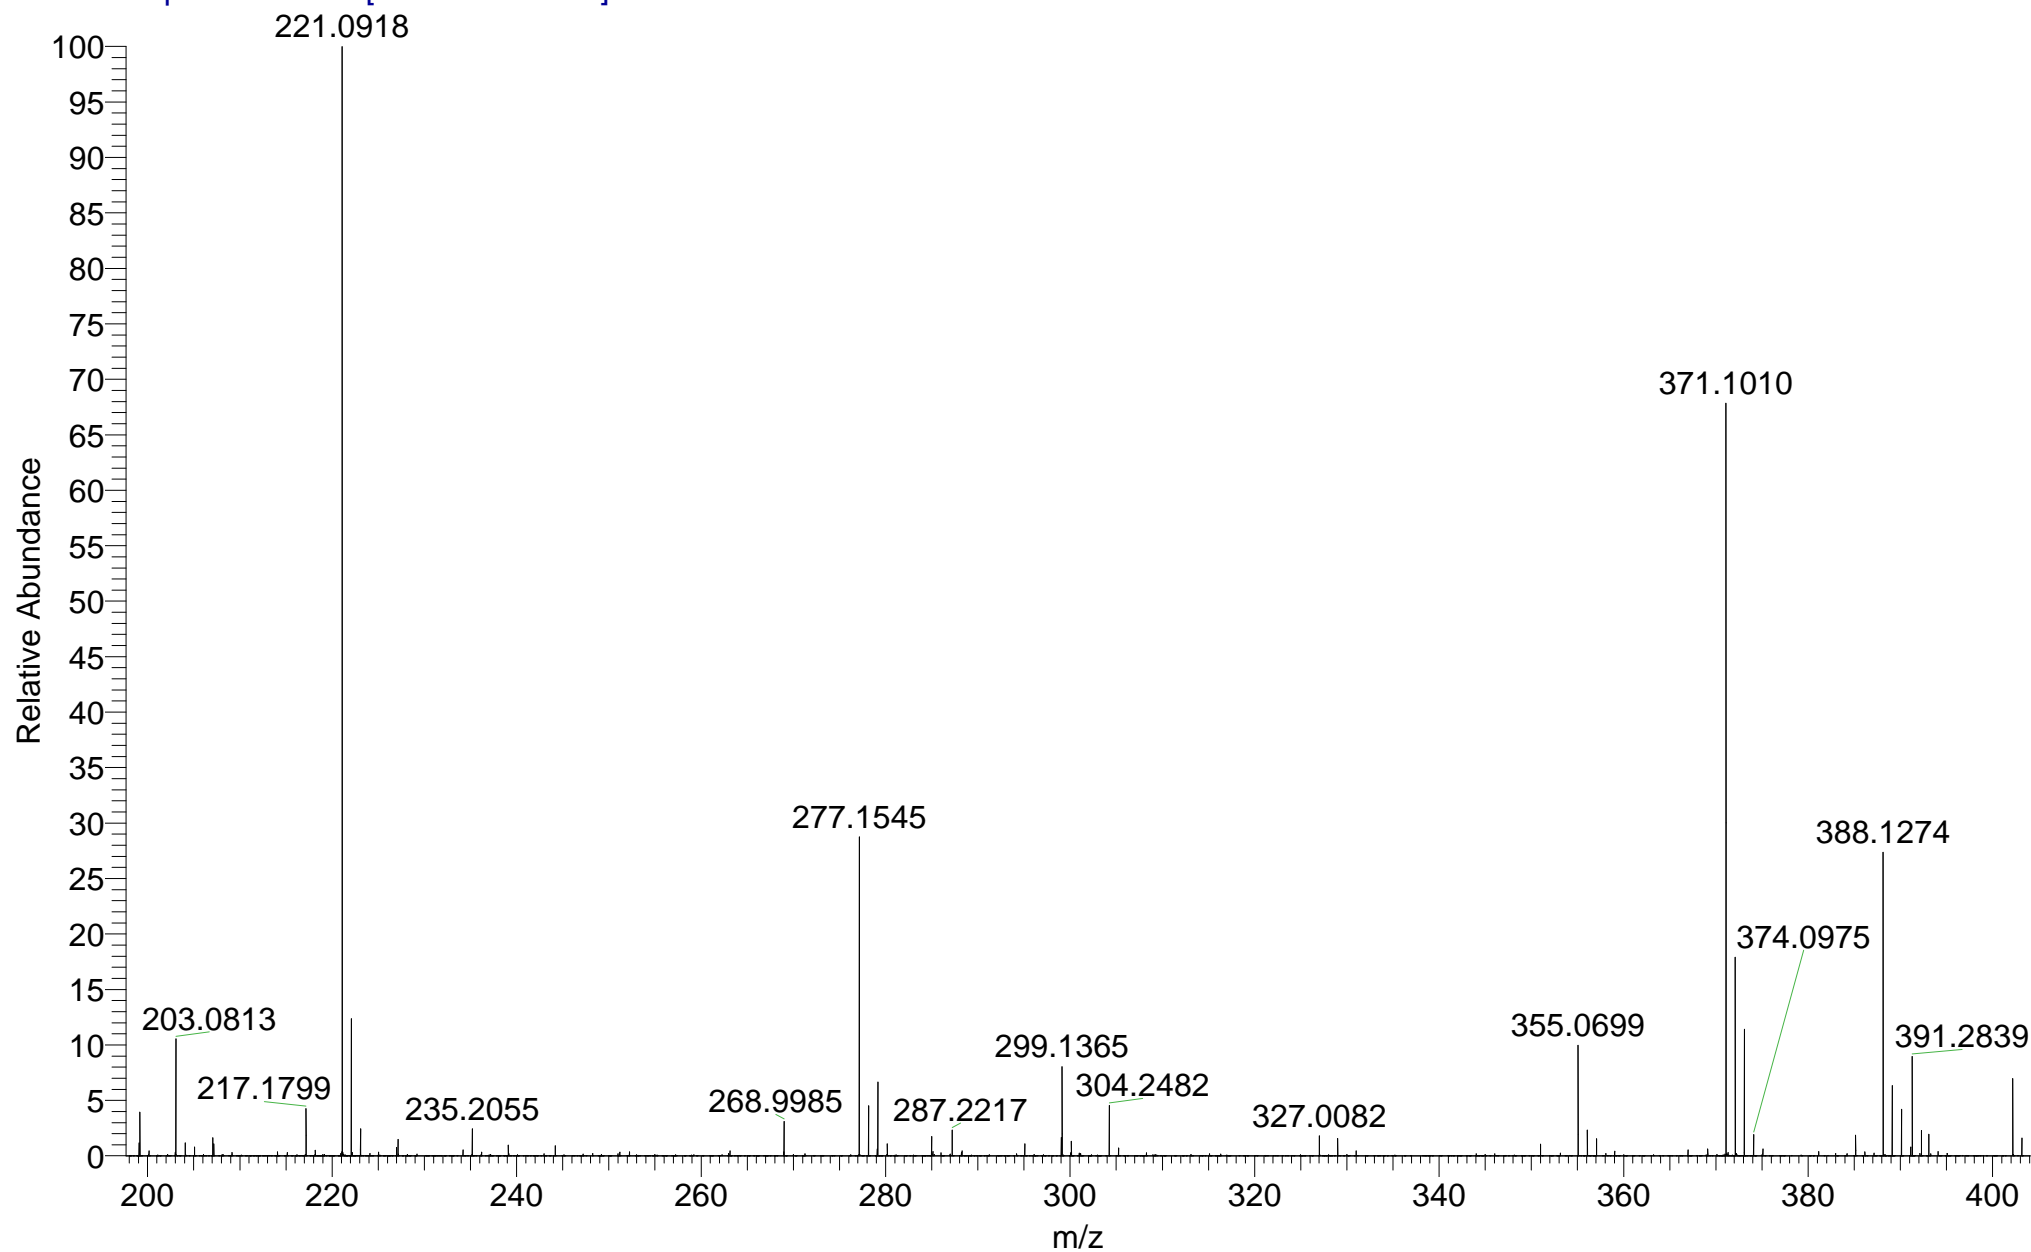



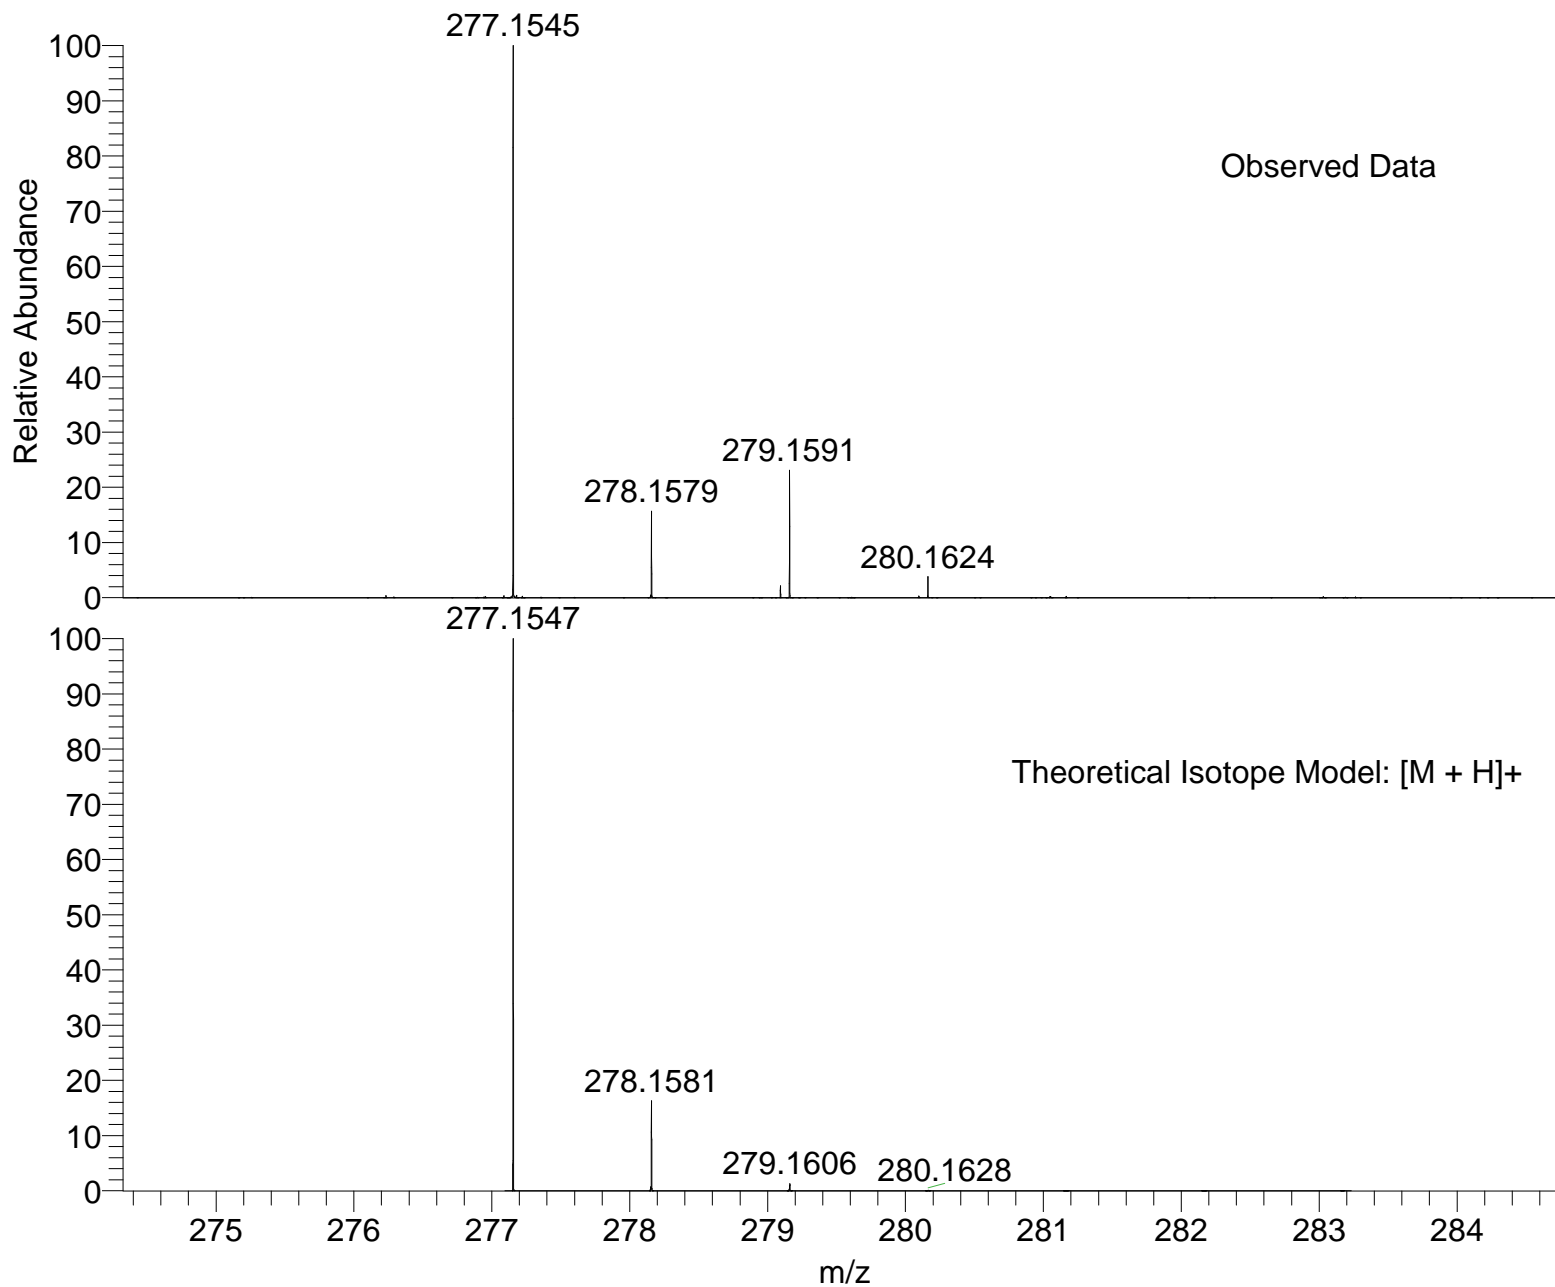

NL:  
1.03E6  
BRASHE\_OU5ZN\_#6-12 RT:  
0.11-0.37 AV: 6 T: FTMS + p  
NSI Full ms [120.00-1935.00]

NL:  
1.96E4  
C<sub>15</sub>H<sub>20</sub>N<sub>2</sub>O<sub>3</sub>H:  
C<sub>15</sub>H<sub>21</sub>N<sub>2</sub>O<sub>3</sub>  
p (gss, s /p:40) Chrg 1  
R: 100000 Res .Pwr . @FWHM

Isotope:           Min. .. Max.  
 14 N               0....15  
 16 O               0....15  
 12 C               0....60  
 1 H                0....70  
 23 Na              0....0  
 Tolerance Window: +- 5.00 ppm  
 Db/Ring Equiv:   -3.. 100  
 Fits:              100

N-Rule: Do not use  
 Charge: 1

| Mass     | Theoretical<br>Mass | Delta<br>[ppm] | RDB  | Composition                                                   |
|----------|---------------------|----------------|------|---------------------------------------------------------------|
| 277.1545 | 277.1547            | -0.6           | 6.5  | C <sub>15</sub> H <sub>21</sub> O <sub>3</sub> N <sub>2</sub> |
|          | 277.1552            | -2.4           | -0.5 | H <sub>17</sub> O <sub>4</sub> N <sub>14</sub>                |
|          | 277.1533            | 4.2            | 7.0  | C <sub>13</sub> H <sub>19</sub> O <sub>2</sub> N <sub>5</sub> |

aet7-23 MW=278?  
(?)/MeOH + NH4OAc

# Compound 43

EPSRC National Centre Swansea  
LTQ Orbitrap XL

adam throup  
05/12/2011 13:14:33

BRASHE163-PV-HNESP #20-35 RT: 0.82-1.25 AV: 16 SM: 7G NL: 2.40E7  
T: FTMS + p NSI Full ms [120.00-2000.00]

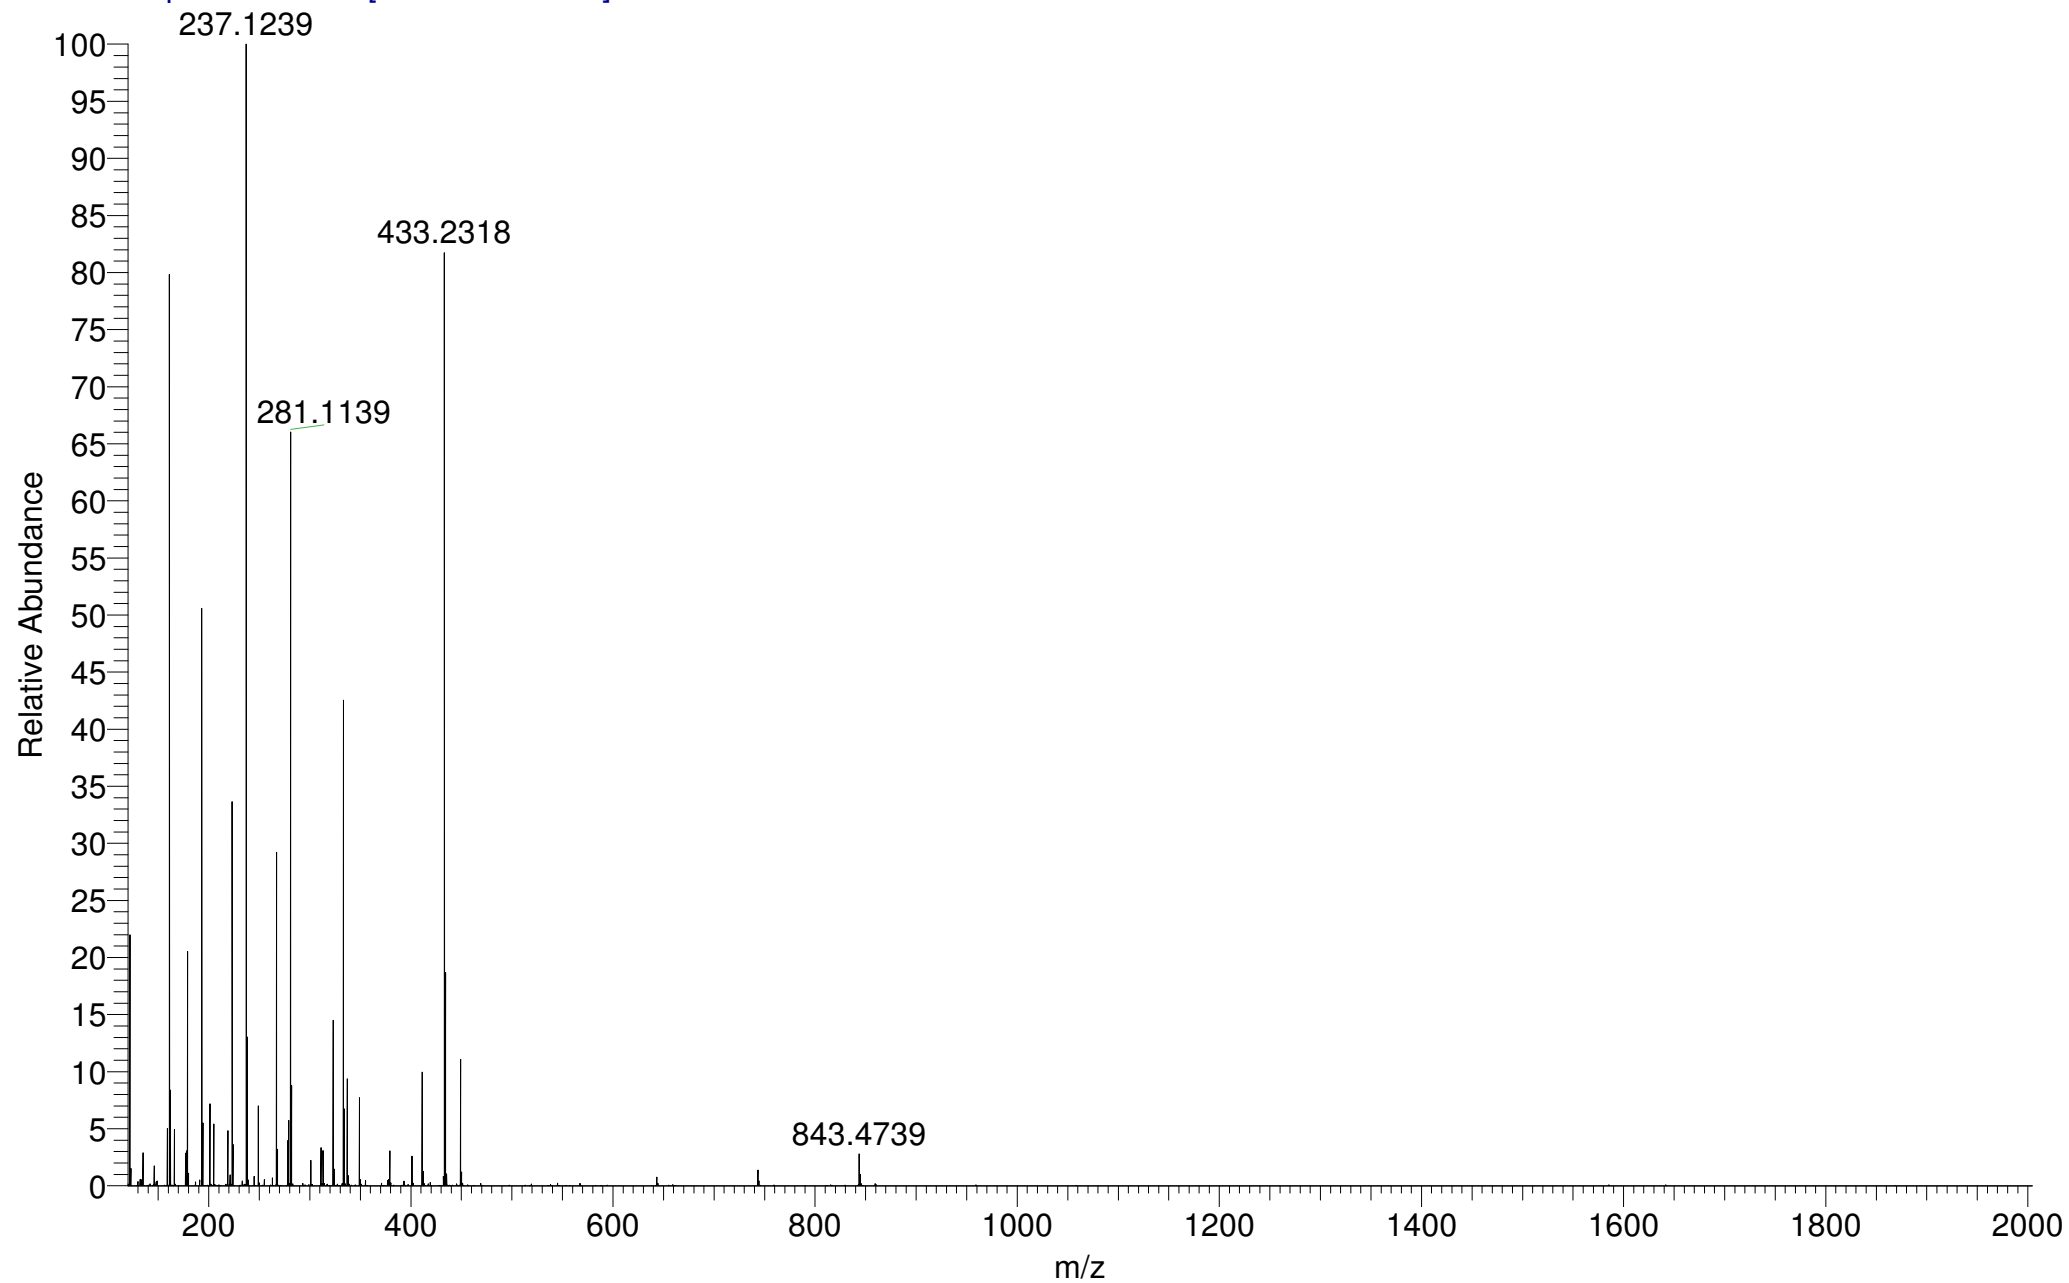

BRASHE163-PV-HNESP #20-35 RT: 0.82-1.25 AV: 16 SM: 7G NL: 2.40E7  
T: FTMS + p NSI Full ms [120.00-2000.00]

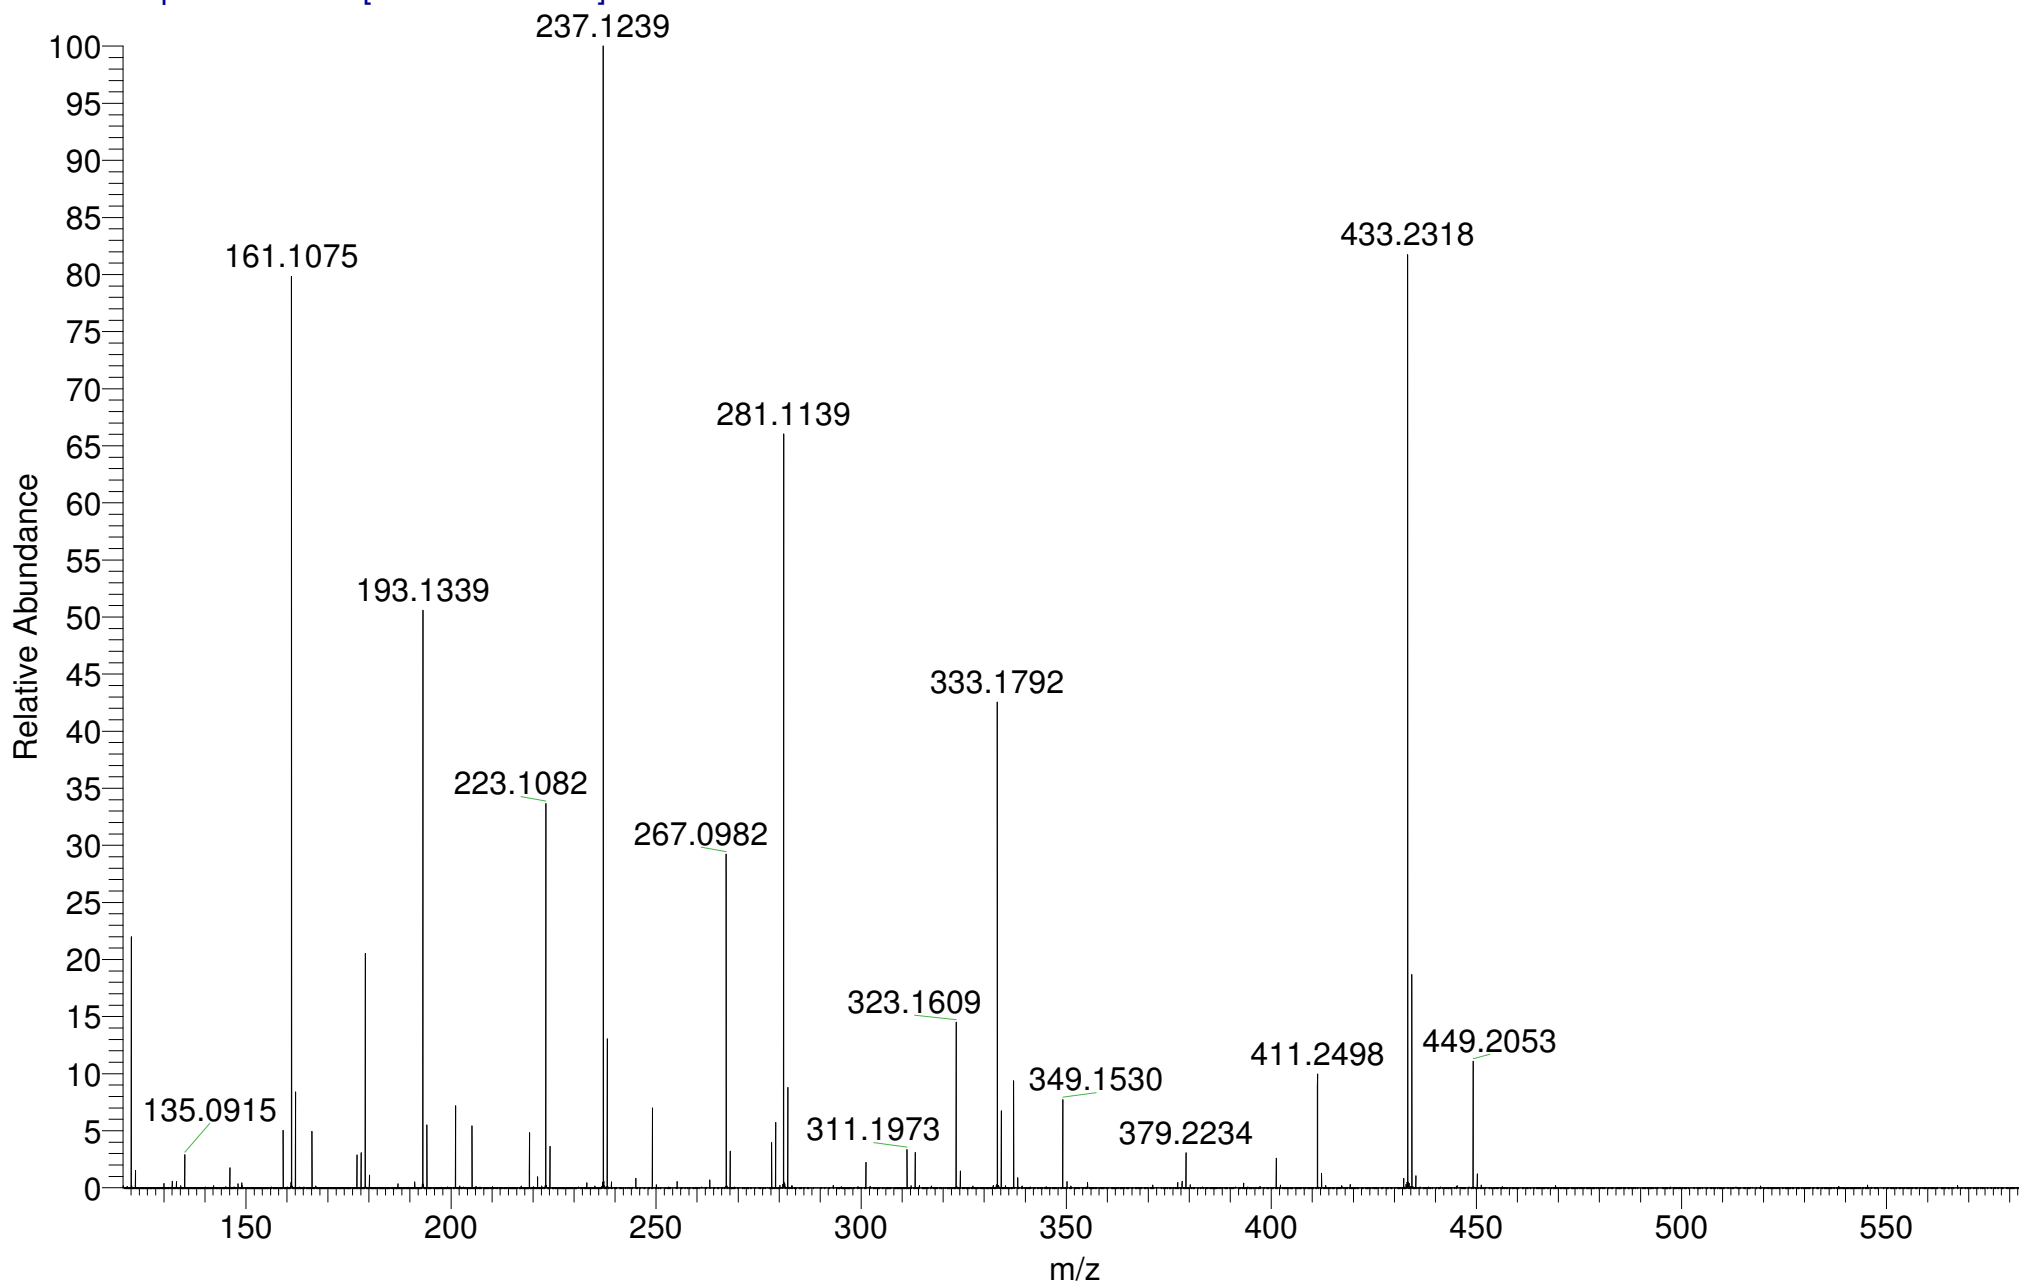

aet7-23 MW=278?  
(?)/MeOH + NH4OAc

EPSRC National Centre Swansea  
LTQ Orbitrap XL

adam throup  
05/12/2011 13:14:33

BRASHE163-PV-HNESP #20-35 RT: 0.82-1.25 AV: 16 SM: 7G NL: 1.38E6  
T: FTMS + p NSI Full ms [120.00-2000.00]

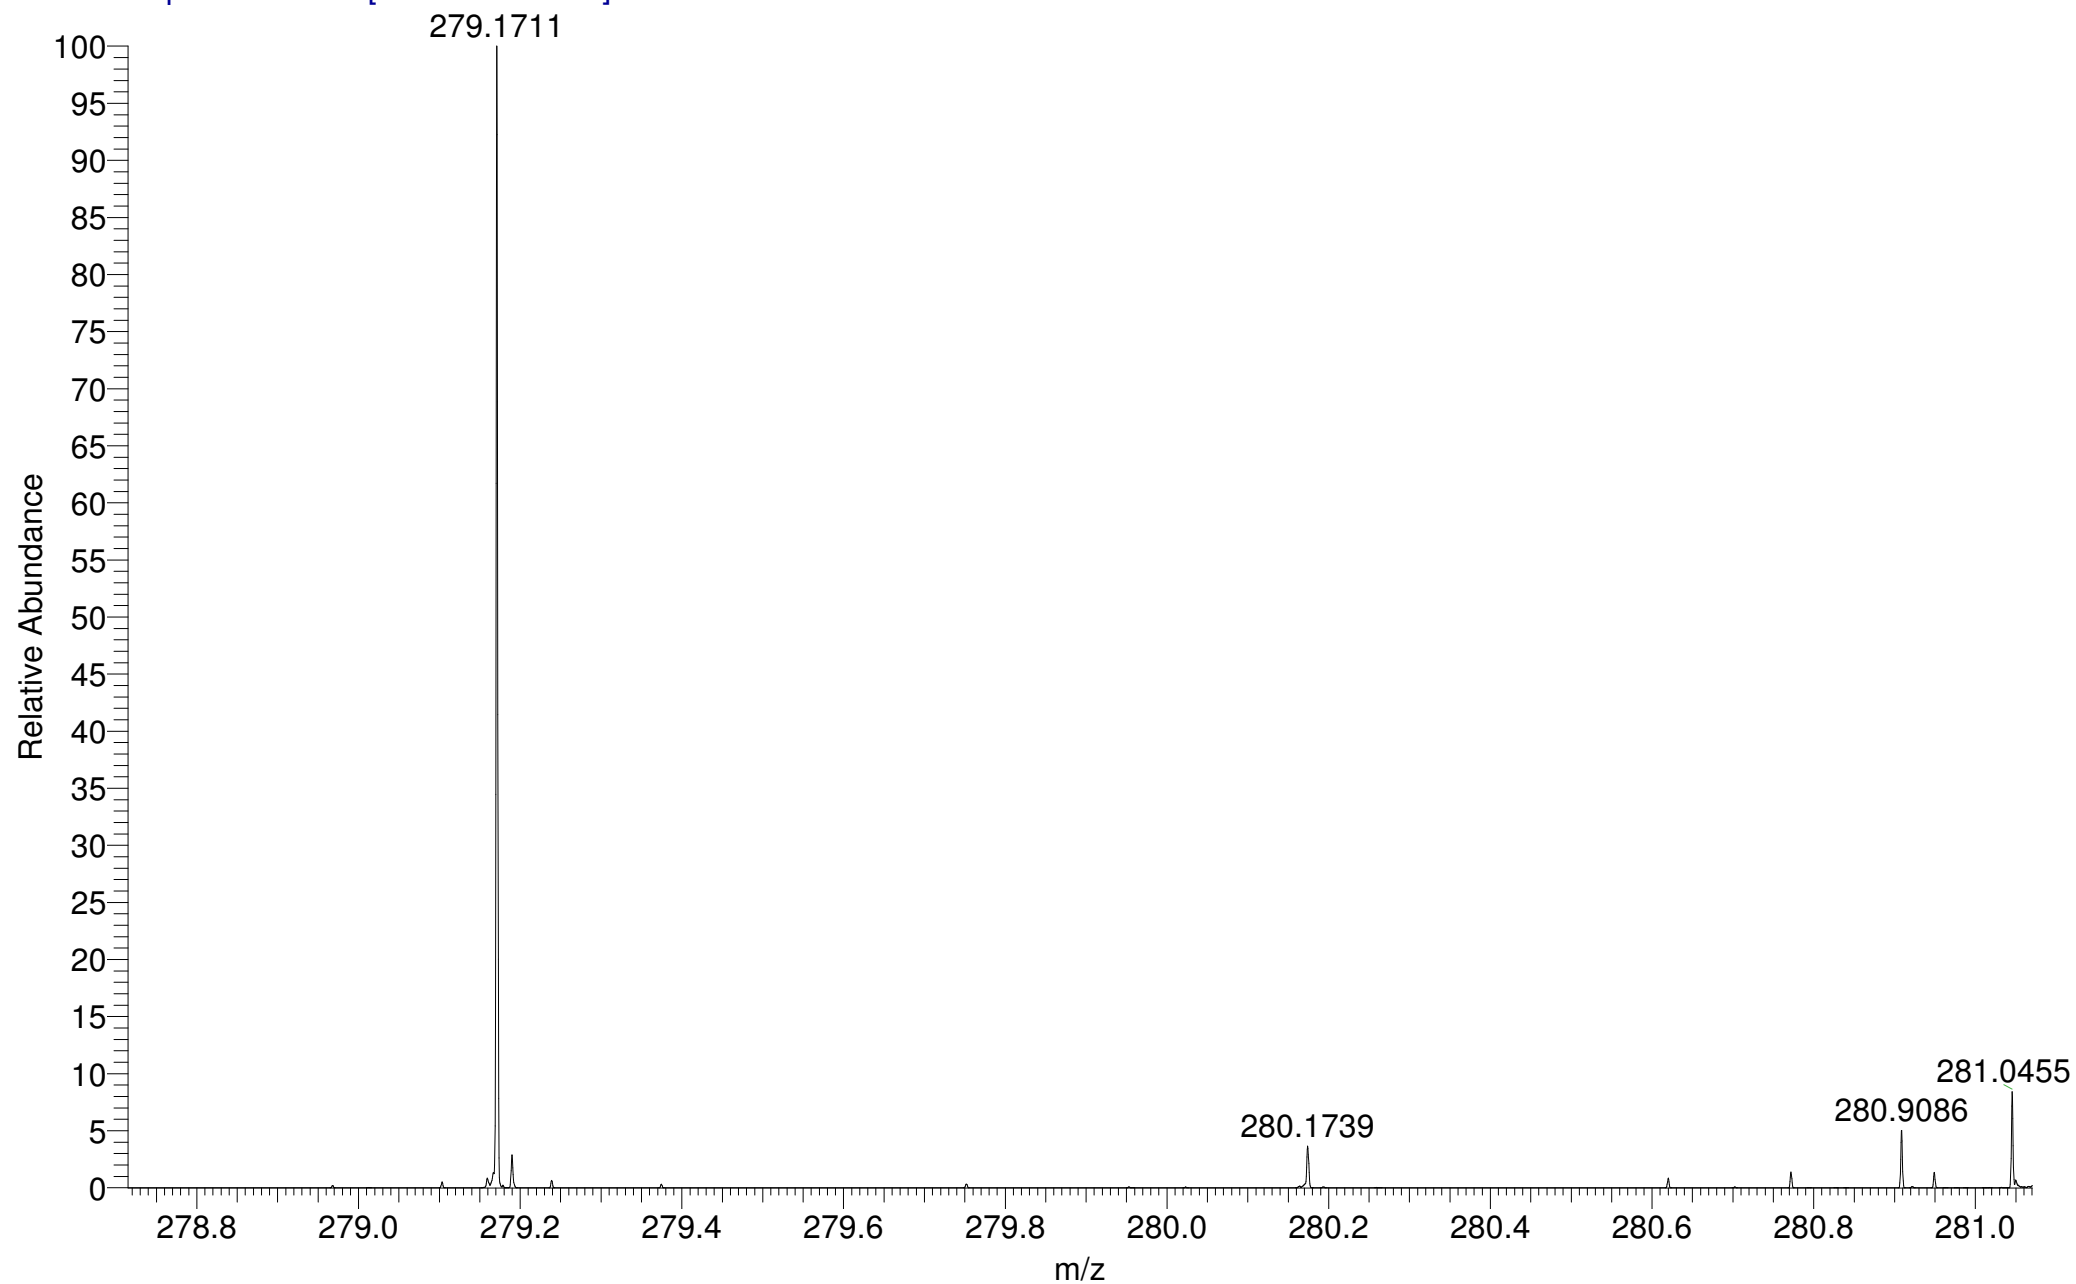

Isotope:           Min. .. Max.  
14 N               0....10  
16 O               0....15  
12 C               0....60  
1 H                0....90  
23 Na              0....0  
Tolerance Window: +- 5.00 ppm  
Db/Ring Equiv:   -3.. 100  
Fits:              100

N-Rule: Do not use  
Charge: 1

| Mass     | Theoretical<br>Mass | Delta<br>[ppm] | RDB | Composition                                                   |
|----------|---------------------|----------------|-----|---------------------------------------------------------------|
| 279.1711 | 279.1703            | 2.8            | 5.5 | C <sub>15</sub> H <sub>23</sub> O <sub>3</sub> N <sub>2</sub> |

aet7-26 MW=345?  
ASAP

# Compound 47

EPSRC National Centre Swansea  
LTQ Orbitrap XL

adam throup  
13/12/2011 14:03:44

BRASHE168-OC-HASP #32-33 RT: 1.01-1.04 AV: 2 SM: 7G NL: 2.20E8  
T: FTMS + p APCI corona Full ms [140.00-800.00]

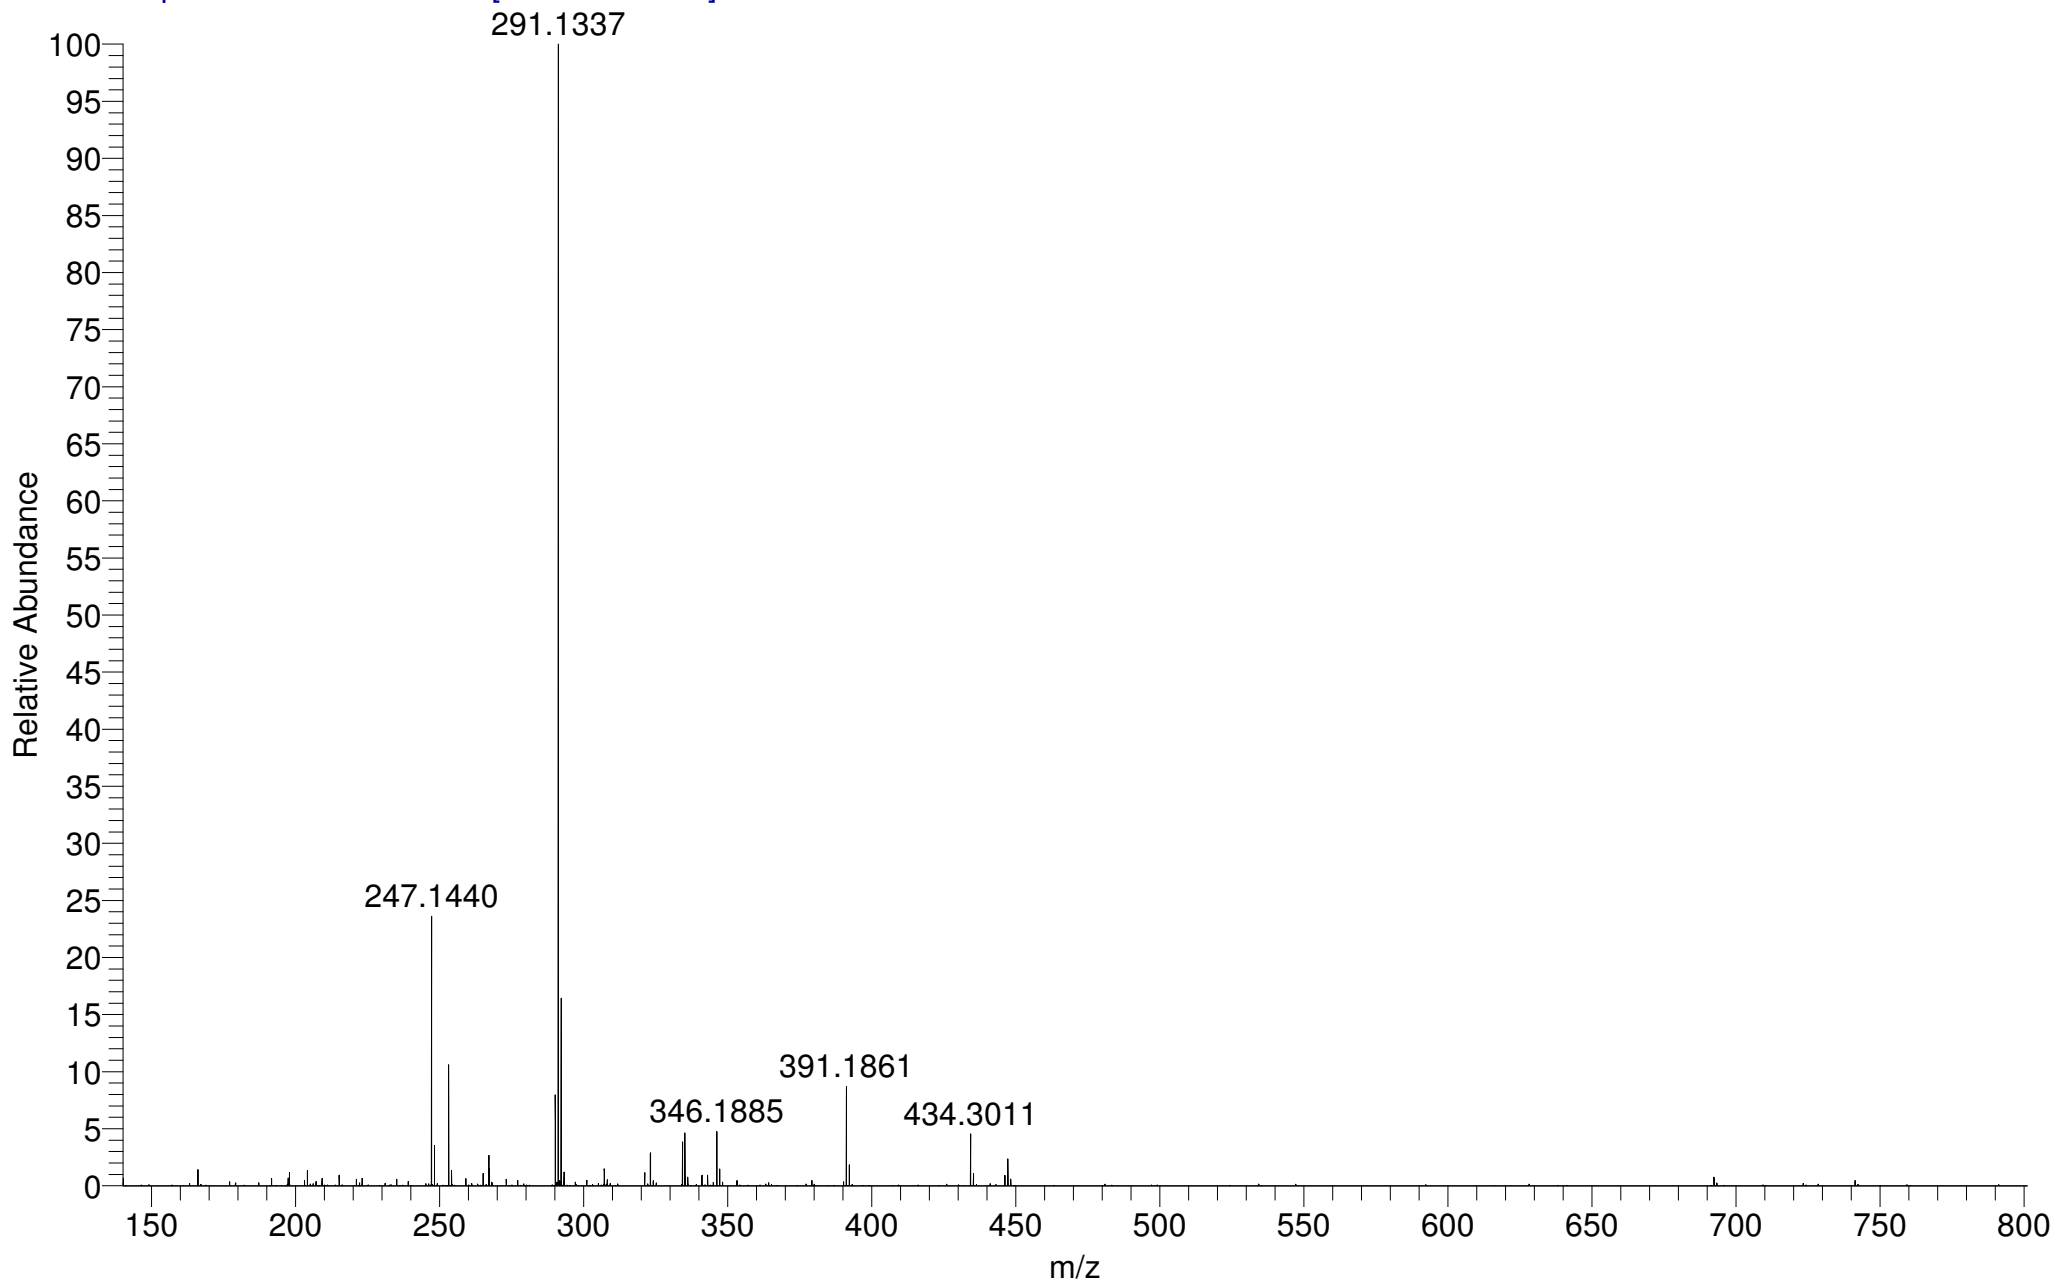

BRASHE168-OC-HASP #32-33 RT: 1.01-1.04 AV: 2 SM: 7G NL: 1.91E7  
T: FTMS + p APCI corona Full ms [140.00-800.00]

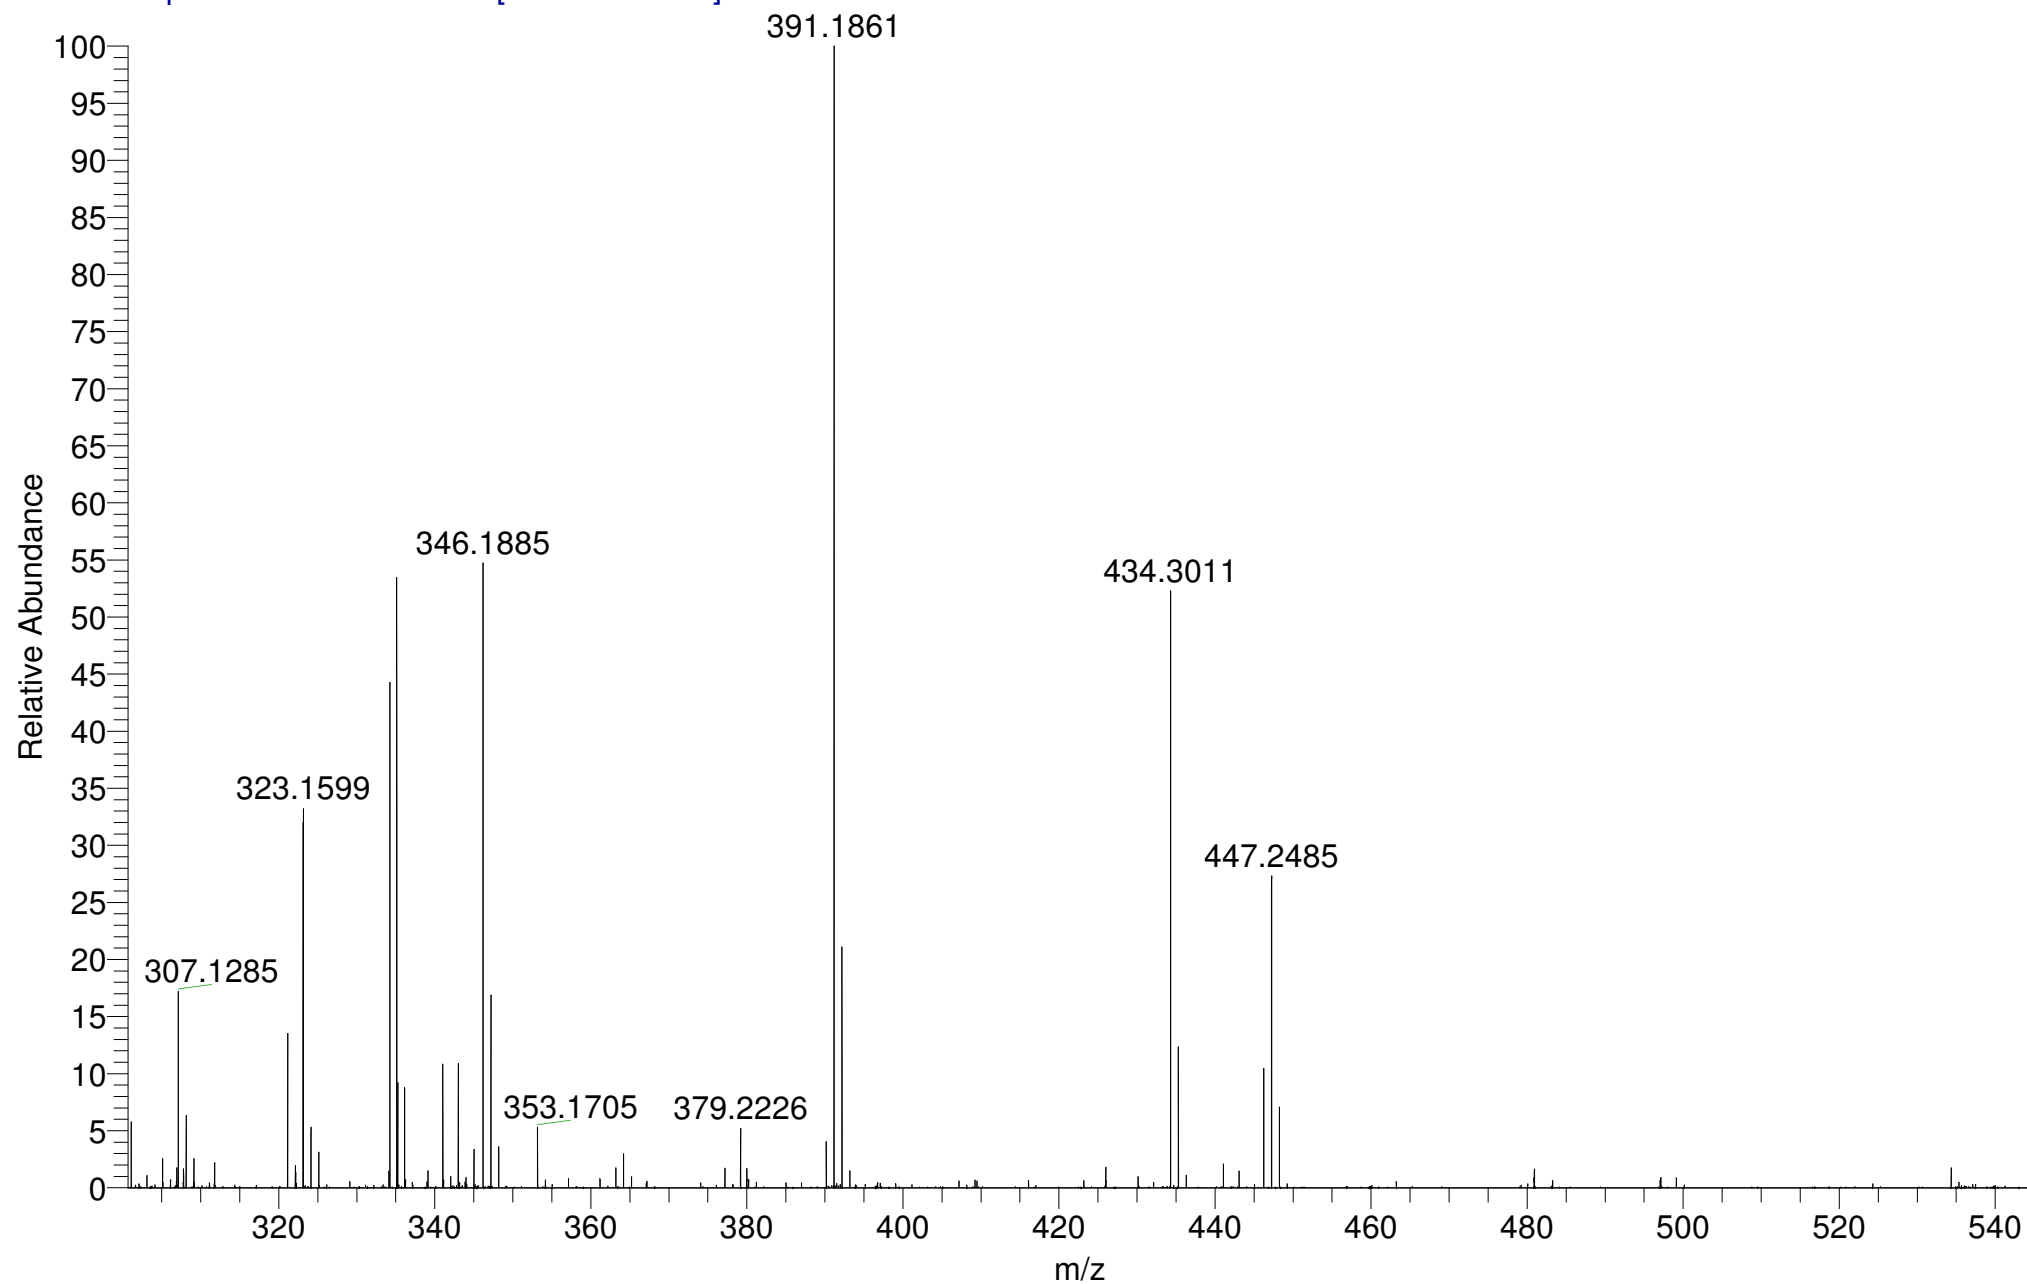



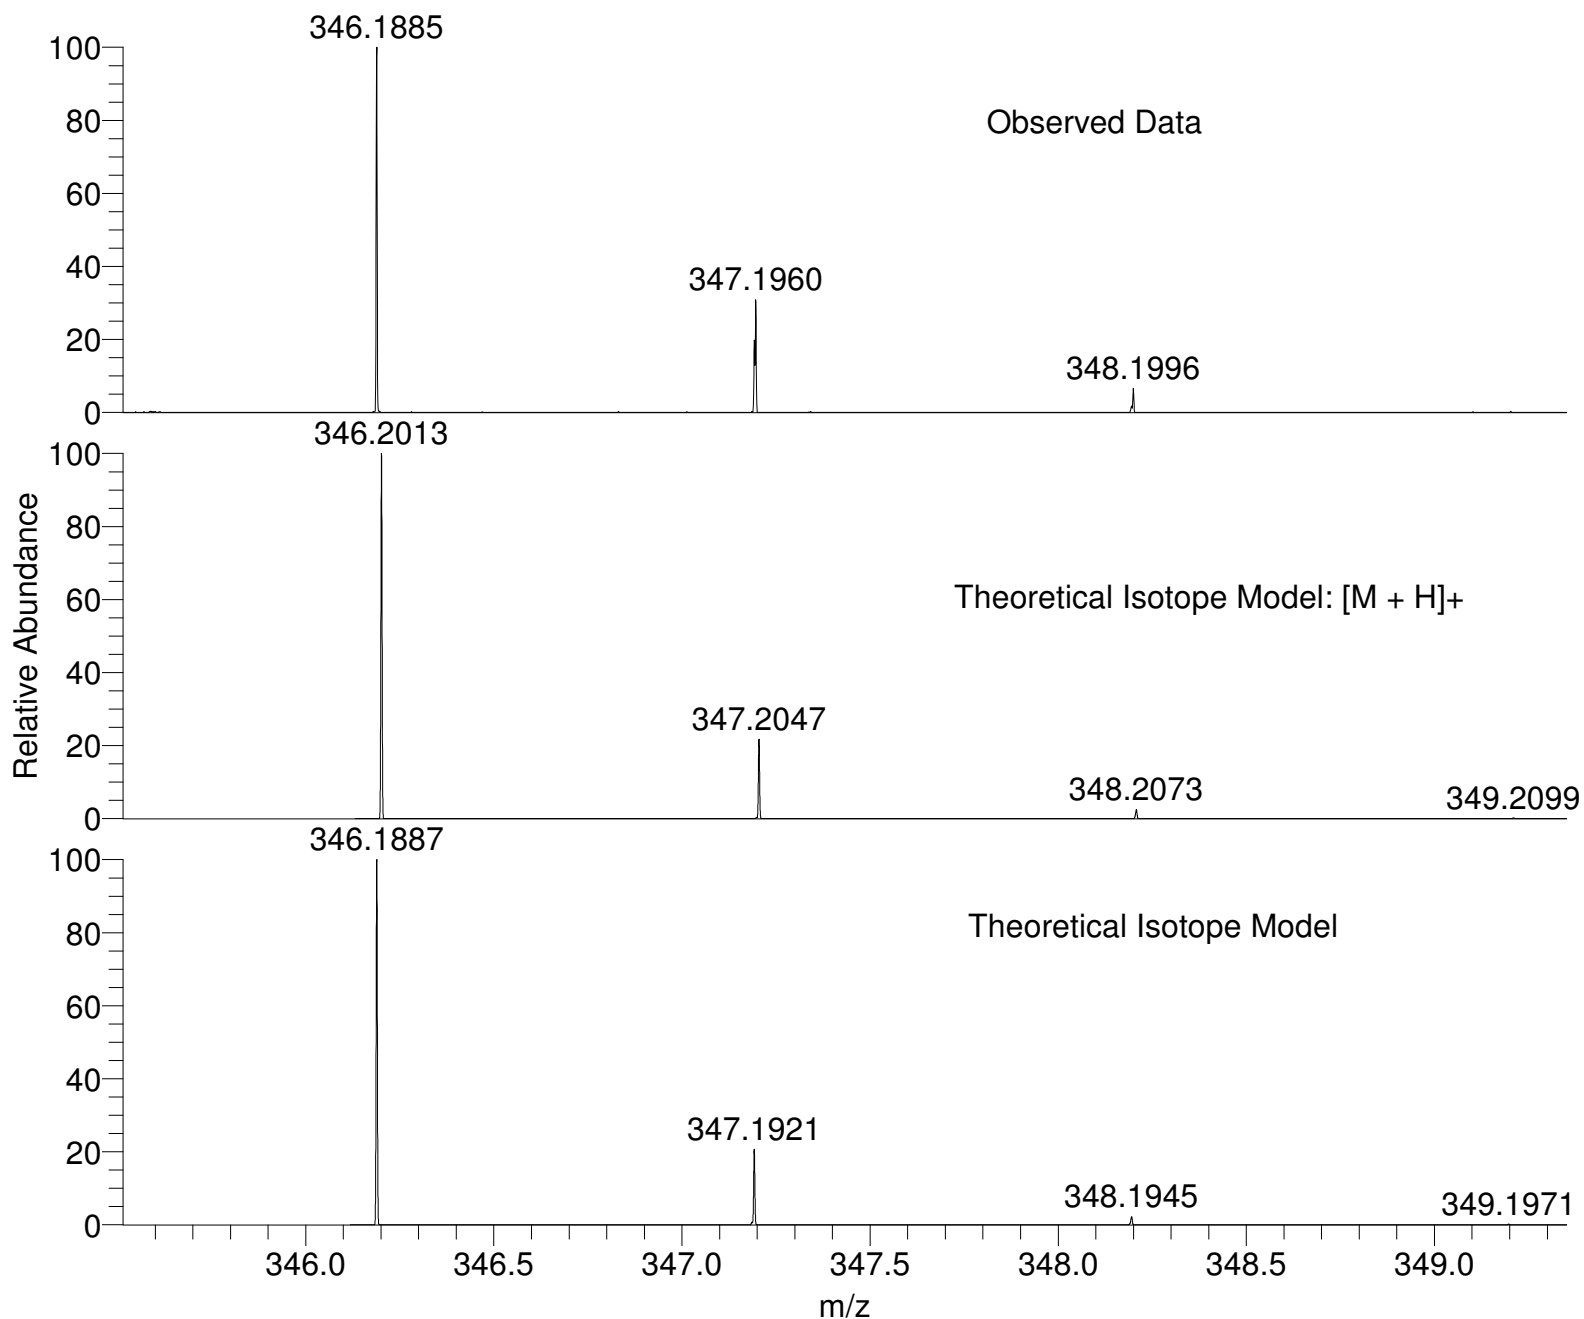

NL:  
1.05E7  
BRASHE168-OC-HASP#32-33  
RT: 1.01-1.04 AV: 2 T: FTMS  
+ p APCI corona Full ms  
[140.00-800.00]

NL:  
1.86E4  
C<sub>20</sub> H<sub>27</sub> NO<sub>4</sub> H:  
C<sub>20</sub> H<sub>28</sub> N<sub>1</sub> O<sub>4</sub>  
p (gss, s /p:40) Chrg 1  
R: 100000 Res .Pwr . @FWHM

NL:  
1.87E4  
C<sub>19</sub> H<sub>26</sub> N<sub>2</sub> O<sub>4</sub>:  
C<sub>19</sub> H<sub>26</sub> N<sub>2</sub> O<sub>4</sub>  
p (gss, s /p:40) Chrg 1  
R: 100000 Res .Pwr . @FWHM

Isotope:           Min. .. Max.  
 12 C               0....40  
 1 H                0....60  
 14 N               0....10  
 16 O               0....10  
 23 Na              0....0  
 Tolerance Window: +- 5.00 ppm  
 Db/Ring Equiv:   -3.. 100  
 Fits:              200

N-Rule: Do not use  
 Charge: 1

| Mass     | Theoretical<br>Mass | Delta<br>[ppm] | RDB  | Composition                                                   |
|----------|---------------------|----------------|------|---------------------------------------------------------------|
| 346.1885 | 346.1887            | -0.6           | 8.0  | C <sub>19</sub> H <sub>26</sub> O <sub>4</sub> N <sub>2</sub> |
|          | 346.1874            | 3.3            | 8.5  | C <sub>17</sub> H <sub>24</sub> O <sub>3</sub> N <sub>5</sub> |
|          | 346.1900            | -4.5           | 13.0 | C <sub>20</sub> H <sub>22</sub> N <sub>6</sub>                |

# Compound 48

aet7-27 MW=347?  
ASAP

EPSRC National Centre Swansea  
LTQ Orbitrap XL

adam throup  
13/12/2011 14:15:40

BRASHE169-OC-HASP #17 RT: 0.62 AV: 1 SM: 7G NL: 3.86E8  
T: FTMS + p APCI corona Full ms [140.00-800.00]

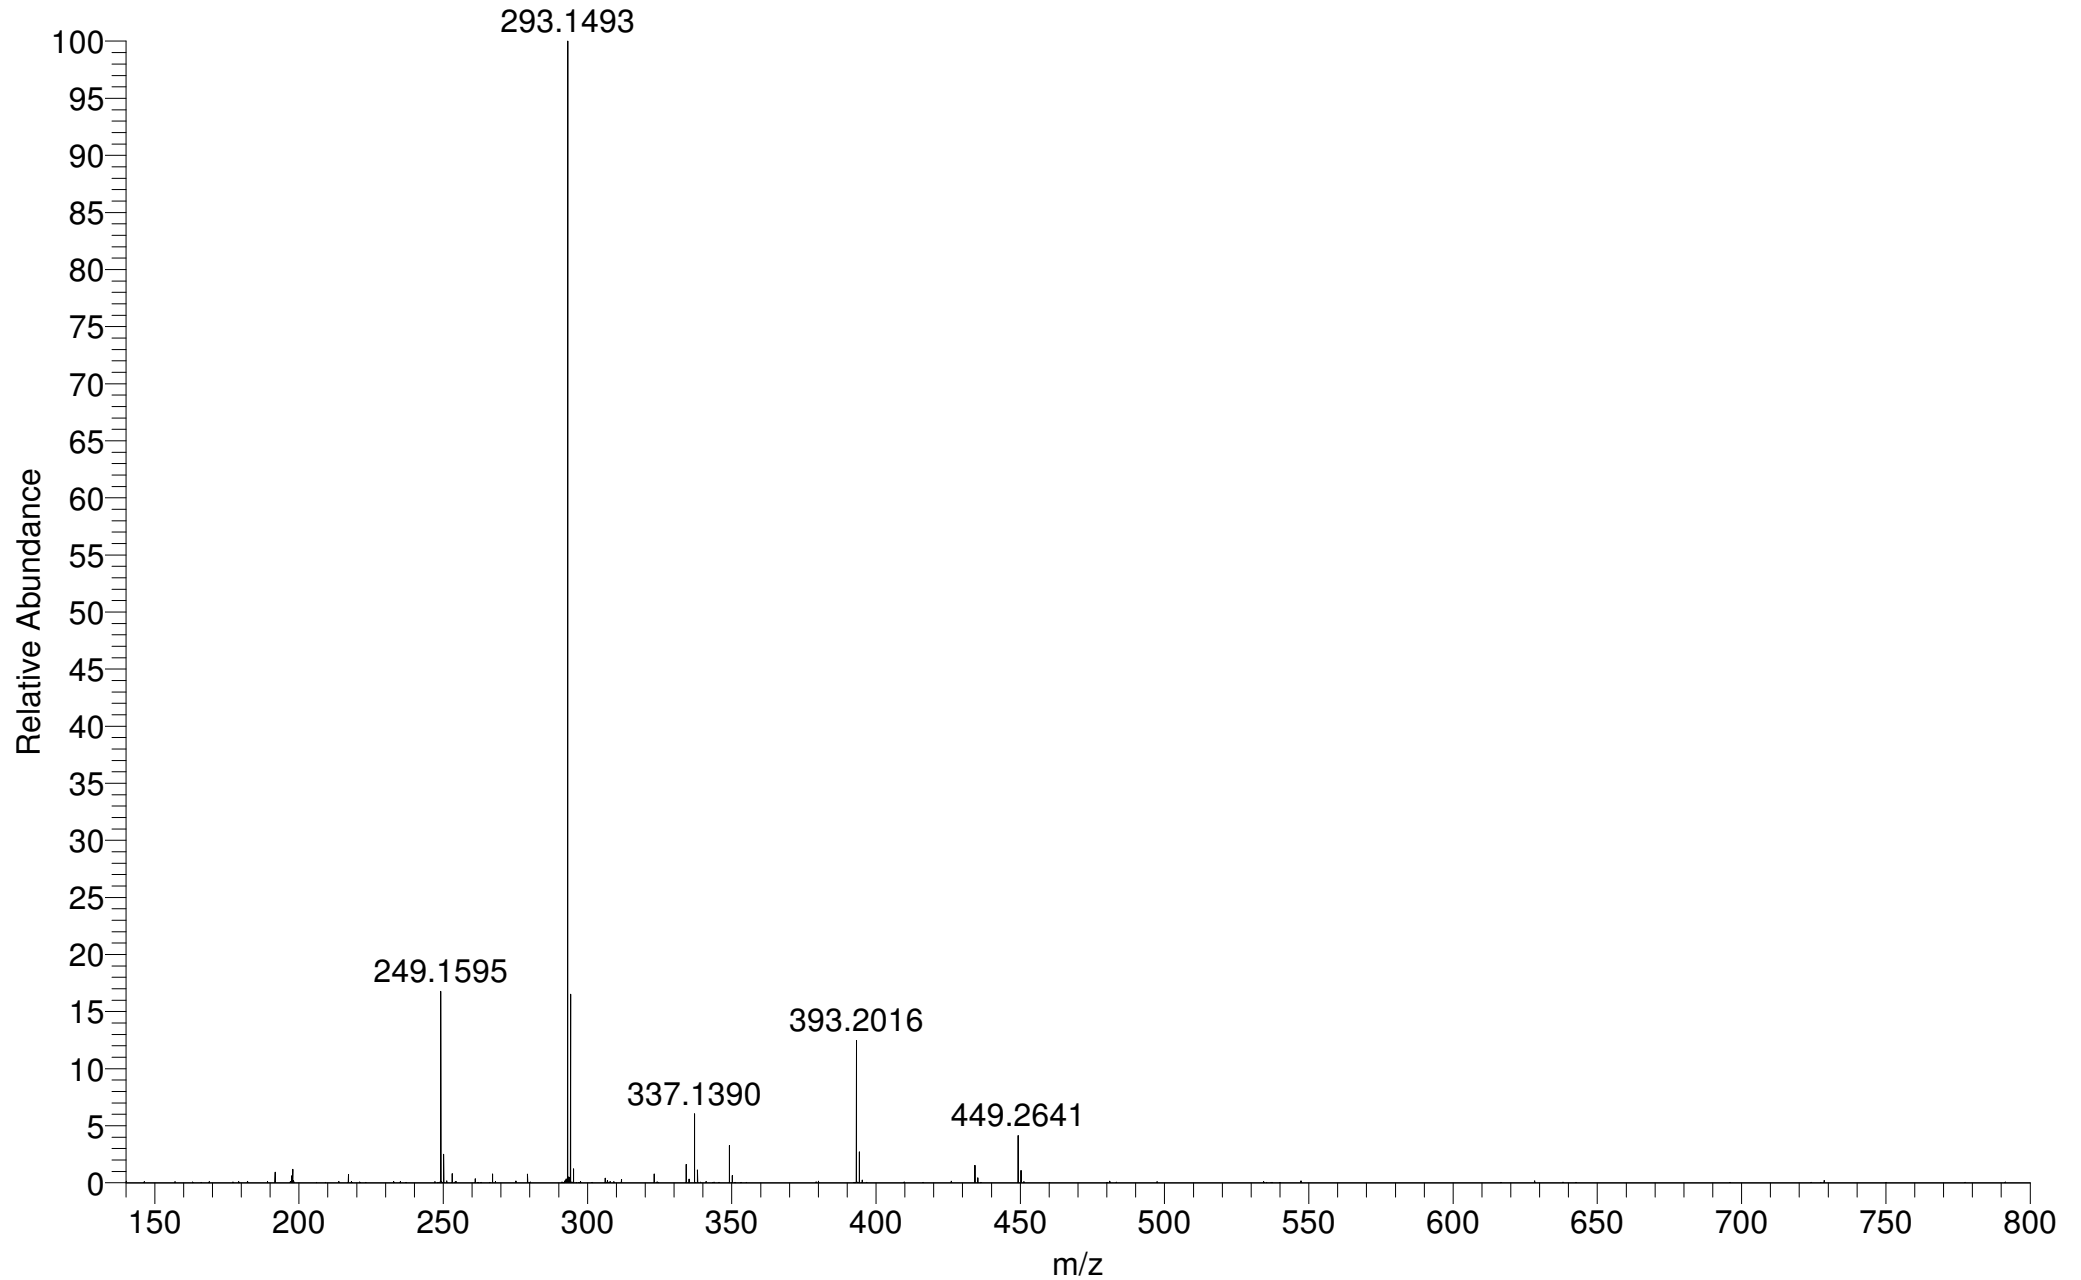

BRASHE169-OC-HASP #17 RT: 0.62 AV: 1 SM: 7G NL: 3.86E8  
T: FTMS + p APCI corona Full ms [140.00-800.00]

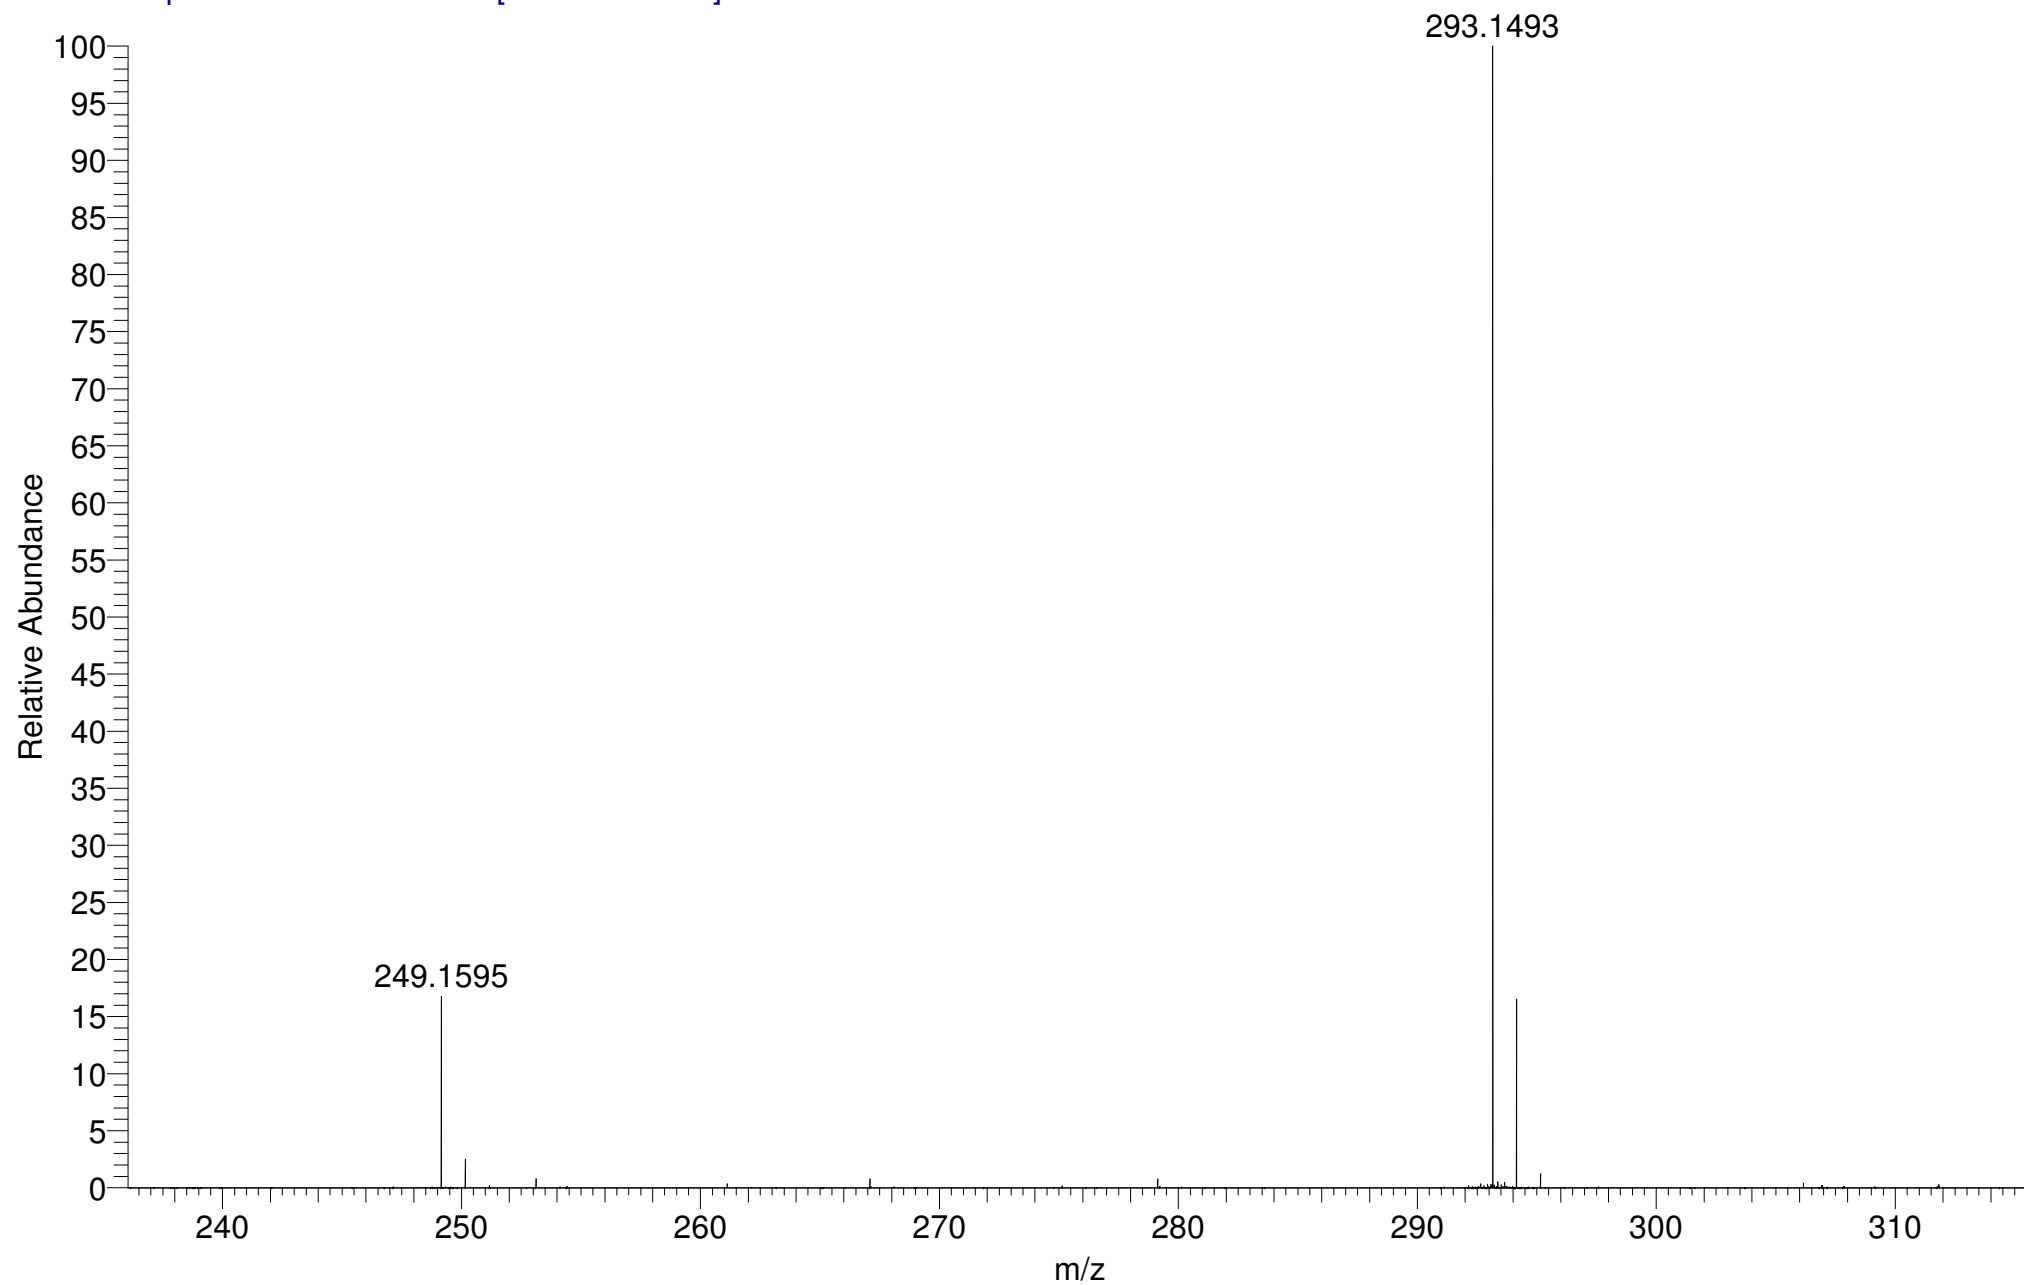

BRASHE169-OC-HASP #17 RT: 0.62 AV: 1 SM: 7G NL: 4.81E7  
T: FTMS + p APCI corona Full ms [140.00-800.00]

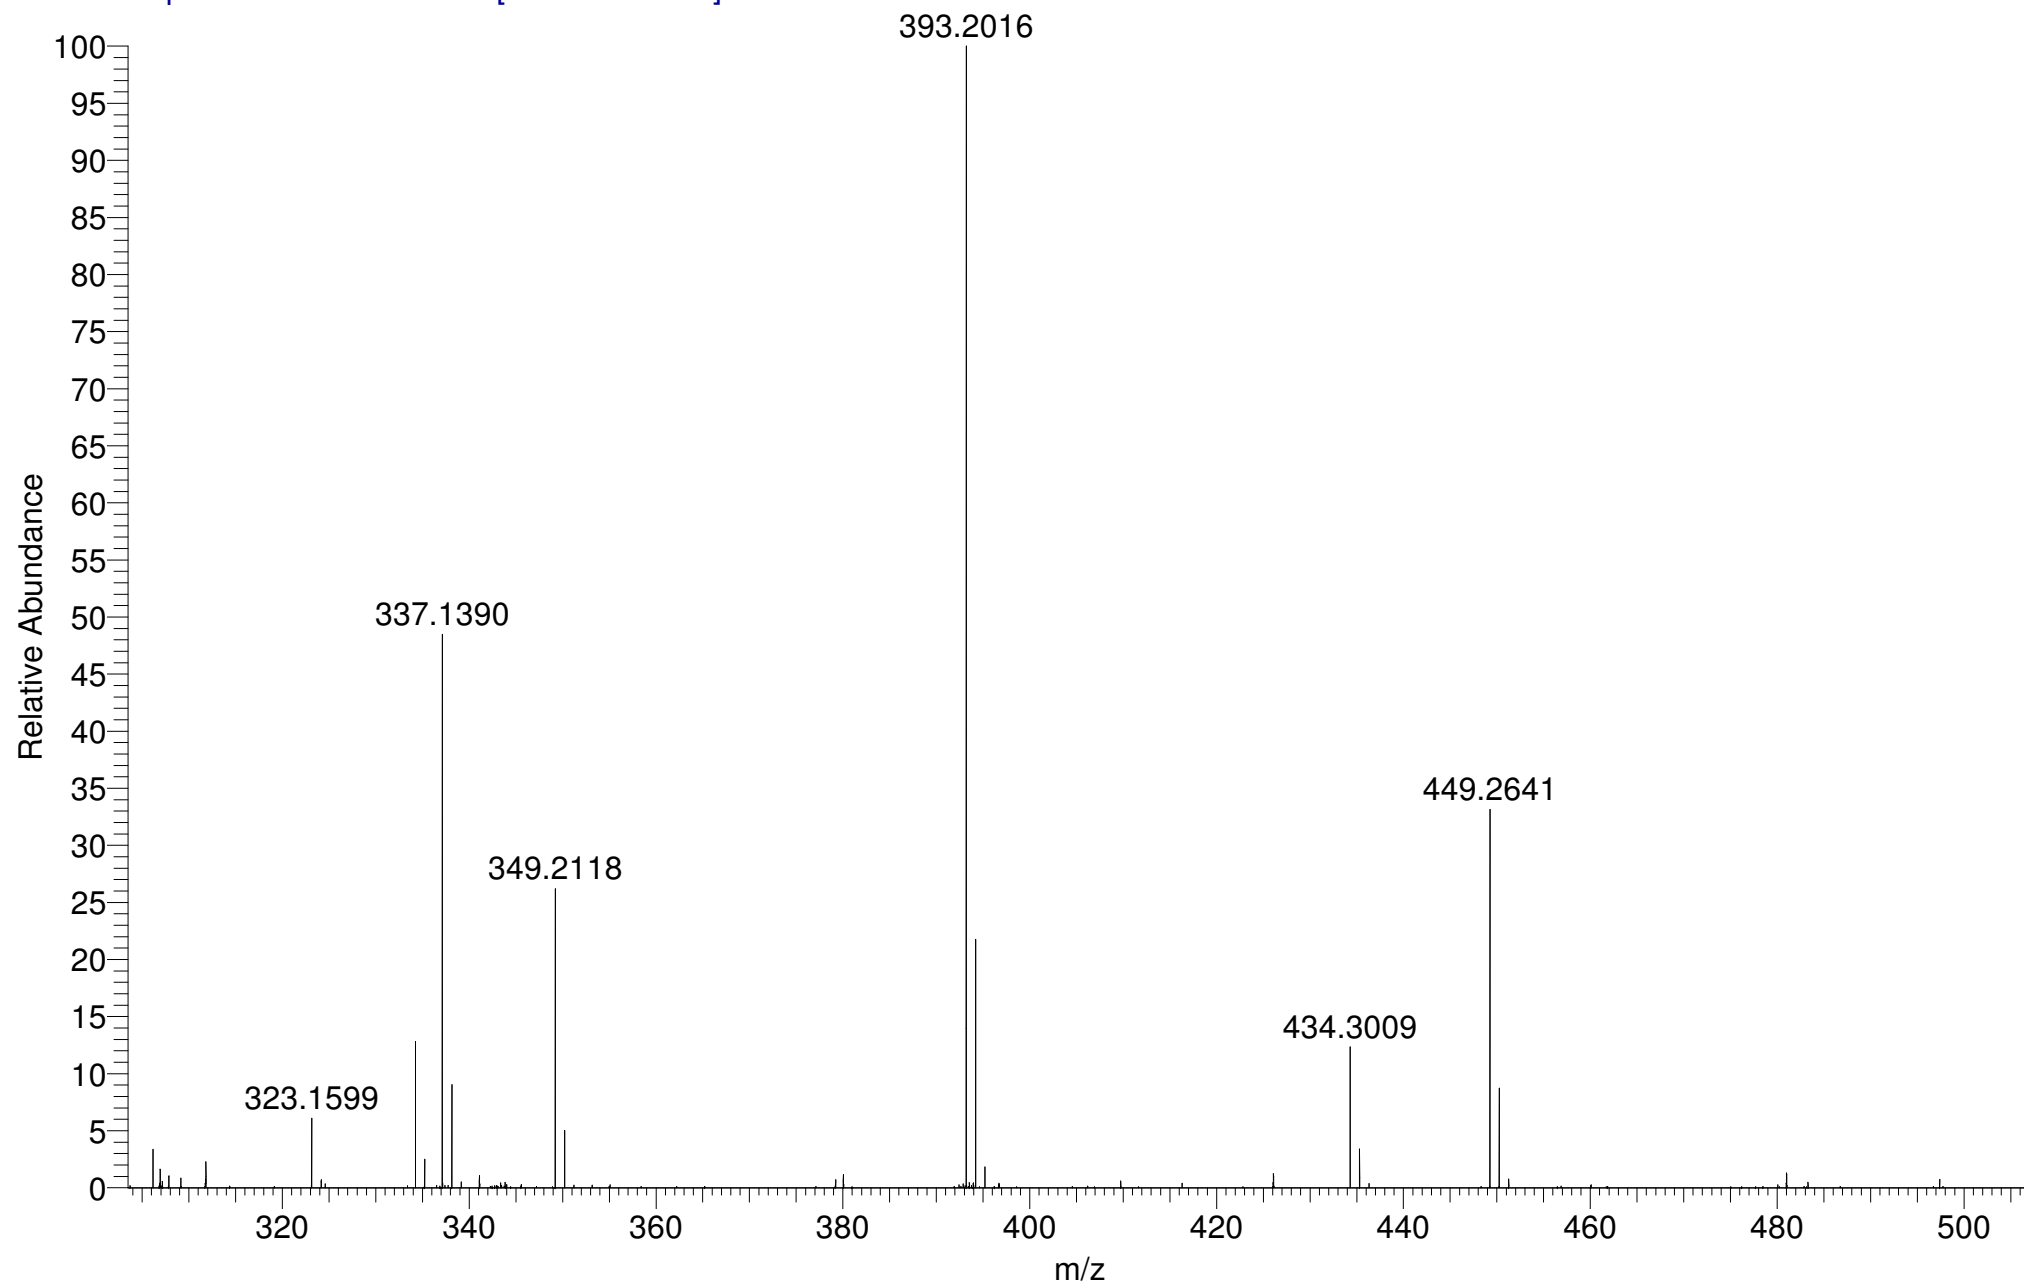

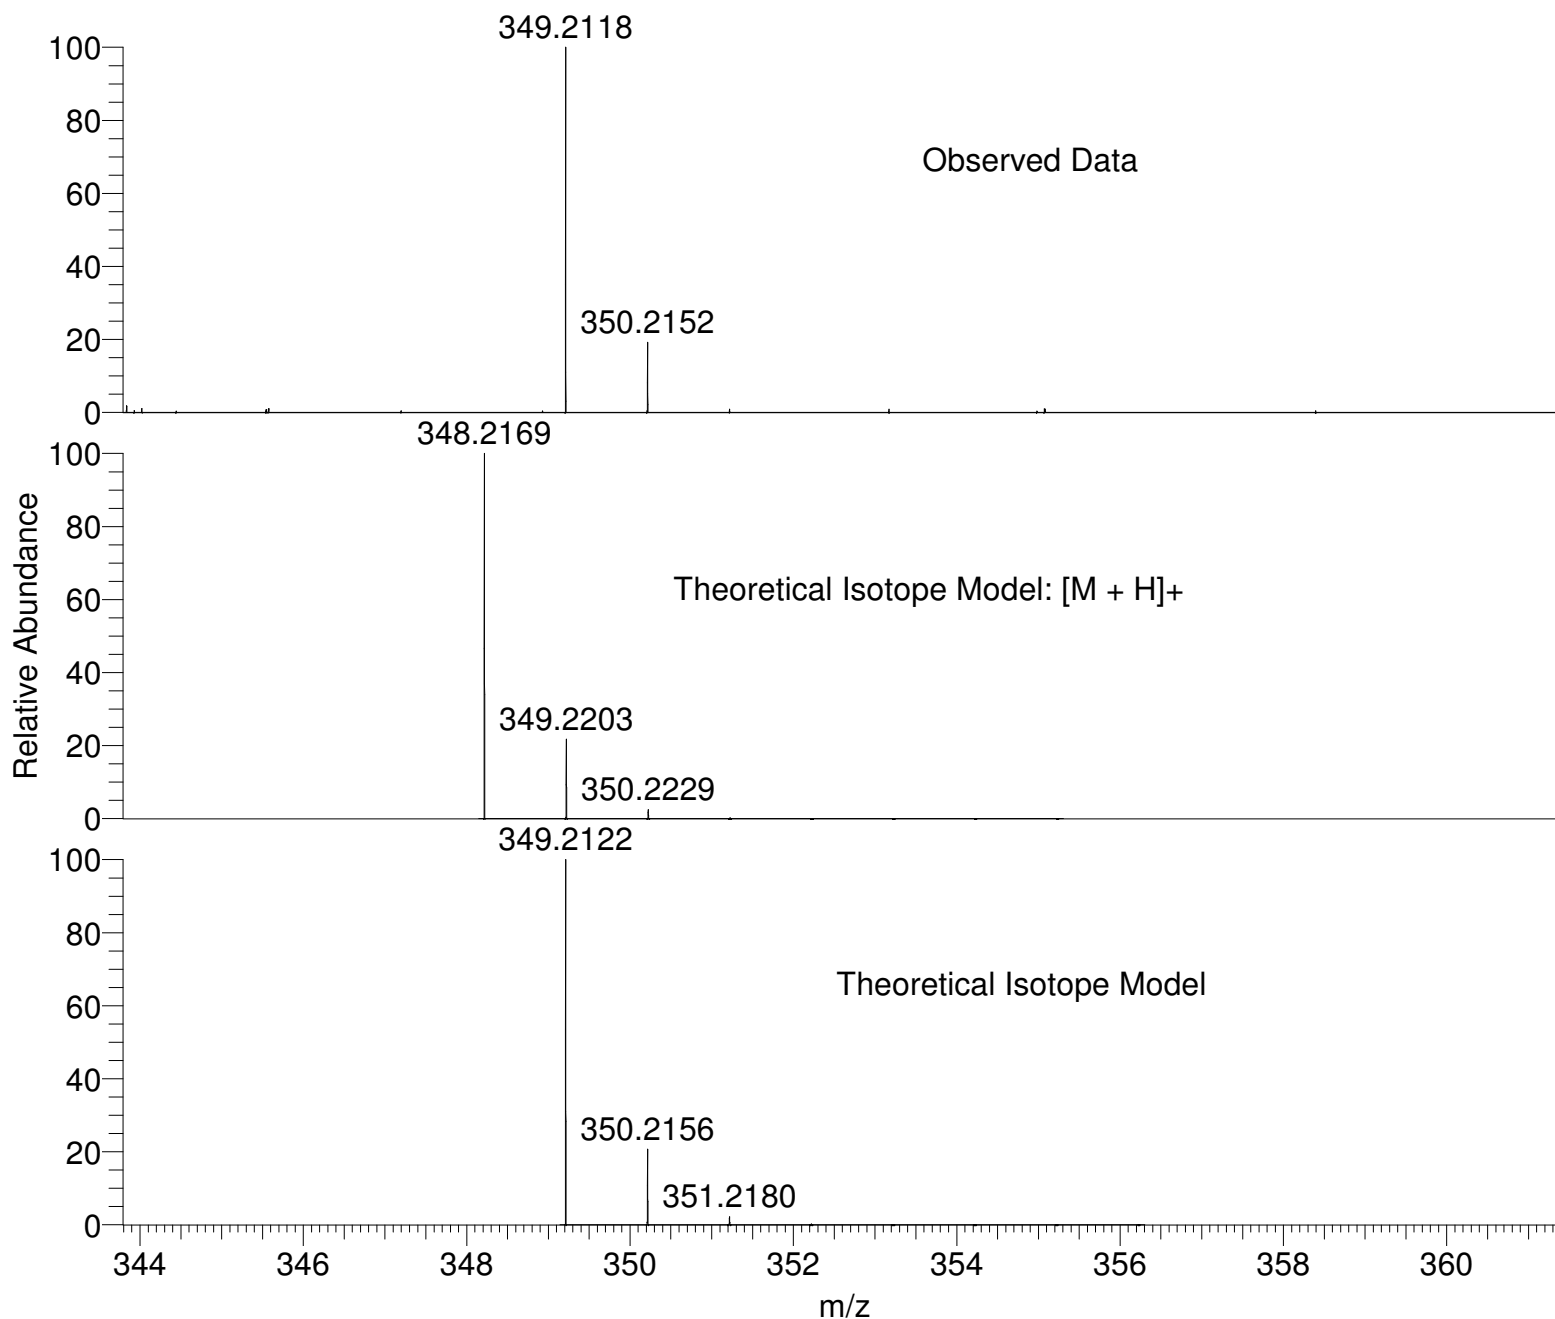

NL:  
1.26E7  
BRASHE169-OC-HASP#17  
RT: 0.62 AV: 1 T: FTMS + p  
APCI corona Full ms  
[140.00-800.00]

NL:  
1.86E4  
C<sub>20</sub>H<sub>29</sub>NO<sub>4</sub>H:  
C<sub>20</sub>H<sub>30</sub>N<sub>1</sub>O<sub>4</sub>  
p (gss, s /p:40) Chrg 1  
R: 100000 Res .Pwr . @FWHM

NL:  
1.87E4  
C<sub>19</sub>H<sub>29</sub>N<sub>2</sub>O<sub>4</sub>:  
C<sub>19</sub>H<sub>29</sub>N<sub>2</sub>O<sub>4</sub>  
p (gss, s /p:40) Chrg 1  
R: 100000 Res .Pwr . @FWHM

Isotope:           Min. .. Max.  
 12 C               0....40  
 1 H                0....60  
 14 N               0....10  
 16 O               0....10  
 23 Na              0....0  
 Tolerance Window: +- 5.00 ppm  
 Db/Ring Equiv:   -3.. 100  
 Fits:              200

N-Rule: Do not use  
 Charge: 1

| Mass     | Theoretical<br>Mass | Delta<br>[ppm] | RDB  | Composition                                                   |
|----------|---------------------|----------------|------|---------------------------------------------------------------|
| 349.2118 | 349.2122            | -1.1           | 6.5  | C <sub>19</sub> H <sub>29</sub> O <sub>4</sub> N <sub>2</sub> |
|          | 349.2108            | 2.7            | 7.0  | C <sub>17</sub> H <sub>27</sub> O <sub>3</sub> N <sub>5</sub> |
|          | 349.2135            | -4.9           | 11.5 | C <sub>20</sub> H <sub>25</sub> N <sub>6</sub>                |

aet7-39 MW=574?  
(DCM)/MeOH + NH4OAc

# Compound 51

EPSRC National Centre Swansea  
LTQ Orbitrap XL

adam throup  
13/01/2012 14:33:35

BRASHE178-OV-HNESP #21-34 RT: 0.88-1.26 AV: 14 NL: 5.08E6

T: FTMS + p NSI Full ms [120.00-2000.00]

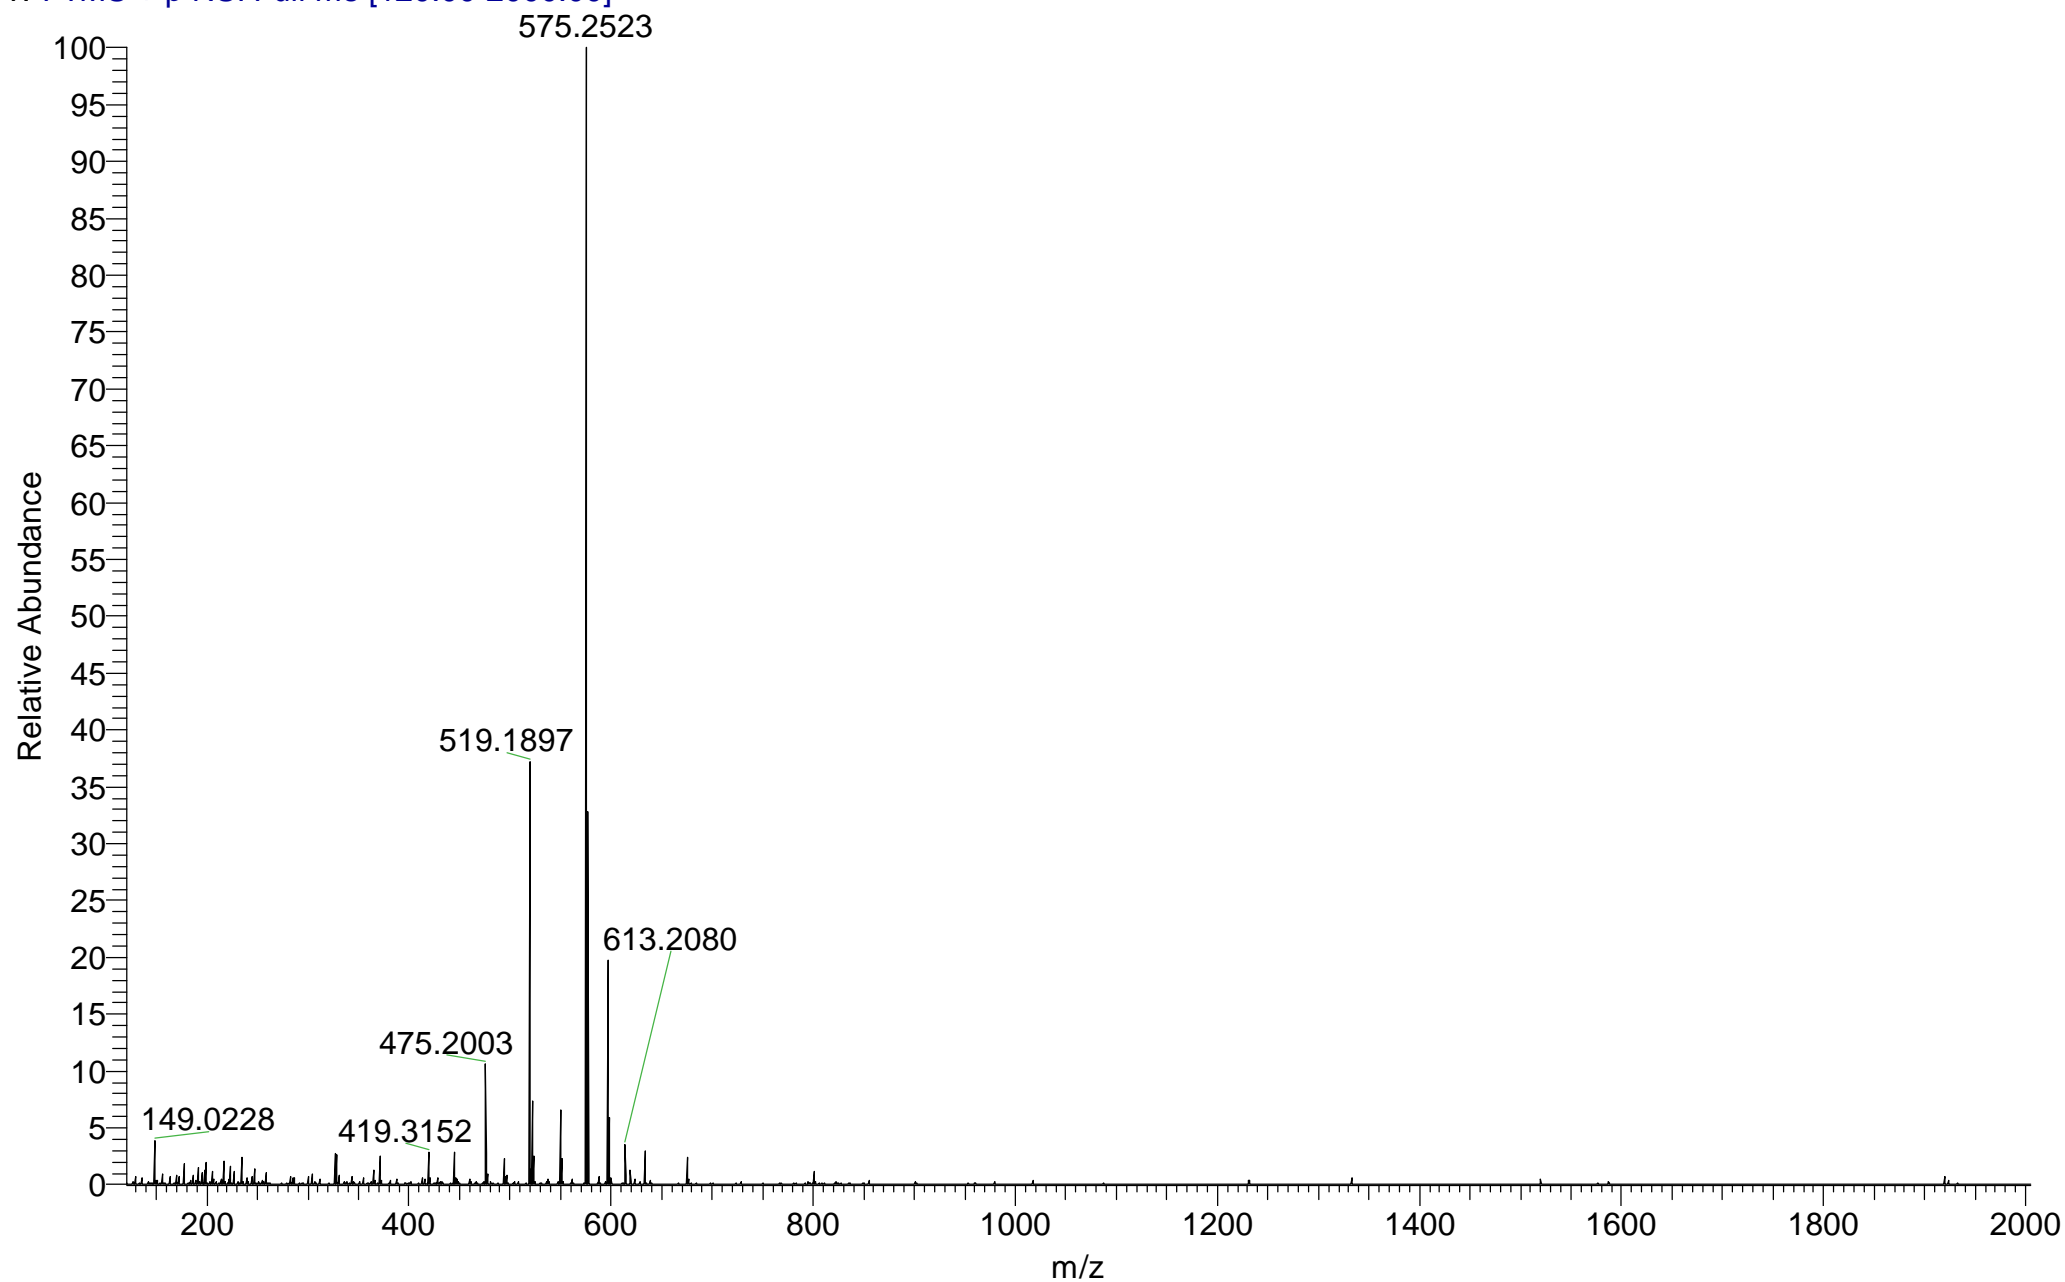



aet7-39 MW=574?  
(DCM)/MeOH + NH<sub>4</sub>OAc

EPSRC National Centre Swansea  
LTQ Orbitrap XL

adam throup  
13/01/2012 14:33:35

BRASHE178-OV-HNESP #21-34 RT: 0.88-1.26 AV: 14 NL: 5.08E6

T: FTMS + p NSI Full ms [120.00-2000.00]

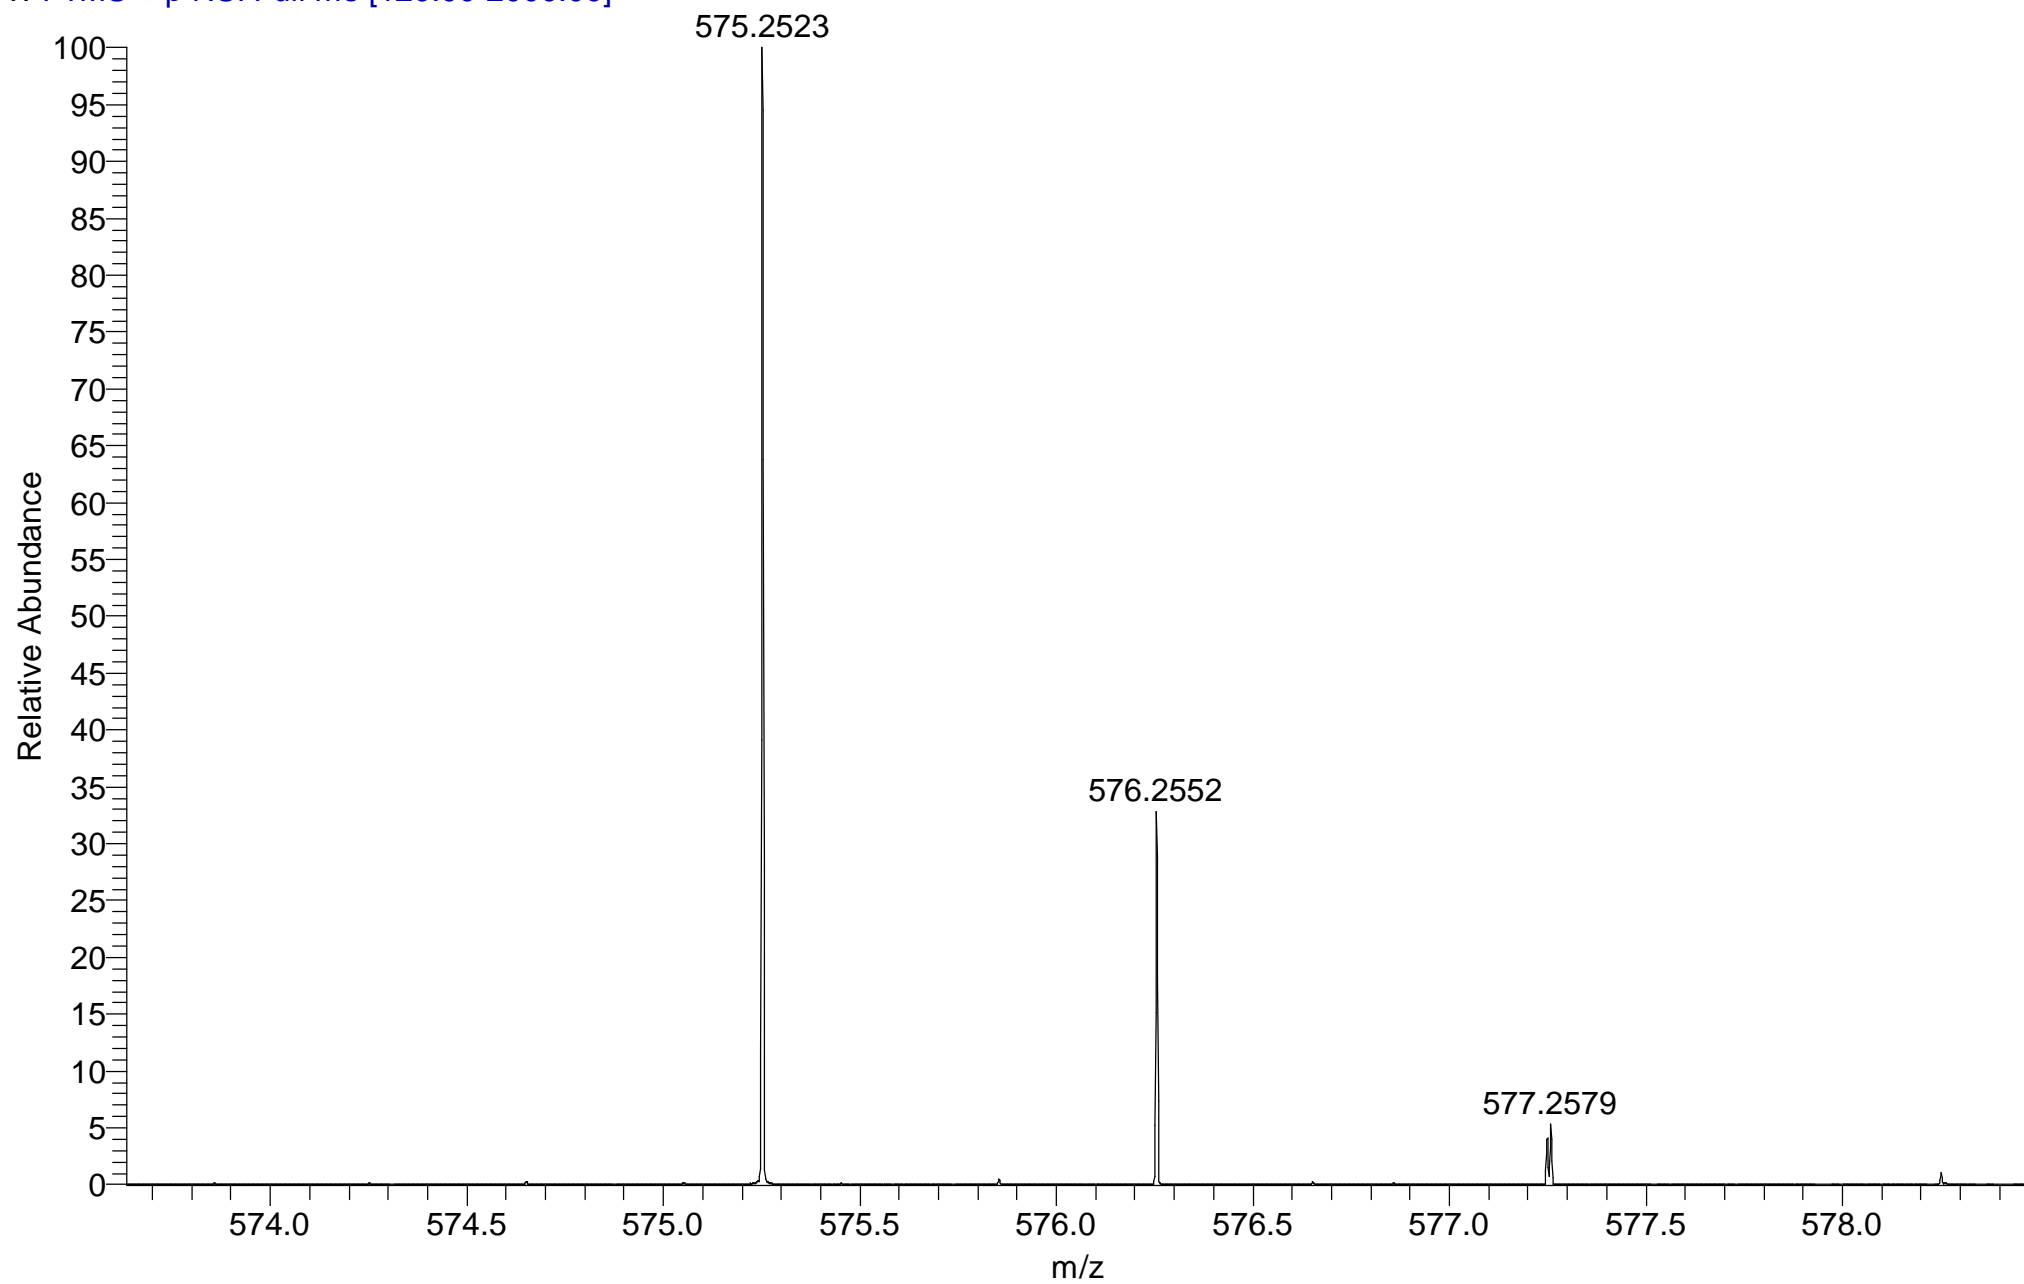

Isotope:           Min. .. Max.  
 14 N               0....10  
 16 O               0....15  
 12 C               0....30  
 1 H                0....60  
 23 Na              0....0  
 32 S               0....2  
 Tolerance Window: +- 5.00 ppm  
 Db/Ring Equiv:   -3..100  
 Fits:              100

N-Rule: Do not use  
 Charge: 1

| Mass     | Theoretical<br>Mass | Delta<br>[ppm] | RDB  | Composition                                                                   |
|----------|---------------------|----------------|------|-------------------------------------------------------------------------------|
| 575.2523 | 575.2521            | 0.4            | 6.5  | C <sub>27</sub> H <sub>43</sub> O <sub>11</sub> S <sub>1</sub>                |
|          | 575.2521            | 0.4            | 12.0 | C <sub>26</sub> H <sub>37</sub> O <sub>6</sub> N <sub>7</sub> S <sub>1</sub>  |
|          | 575.2519            | 0.7            | 3.5  | C <sub>19</sub> H <sub>39</sub> O <sub>14</sub> N <sub>6</sub>                |
|          | 575.2527            | -0.8           | 2.5  | C <sub>20</sub> H <sub>43</sub> O <sub>9</sub> N <sub>6</sub> S <sub>2</sub>  |
|          | 575.2514            | 1.6            | -2.5 | C <sub>19</sub> H <sub>47</sub> O <sub>13</sub> N <sub>2</sub> S <sub>2</sub> |
|          | 575.2514            | 1.6            | 3.0  | C <sub>18</sub> H <sub>41</sub> O <sub>8</sub> N <sub>9</sub> S <sub>2</sub>  |
|          | 575.2532            | -1.6           | 8.5  | C <sub>20</sub> H <sub>35</sub> O <sub>10</sub> N <sub>10</sub>               |
|          | 575.2532            | -1.6           | 3.0  | C <sub>21</sub> H <sub>41</sub> O <sub>15</sub> N <sub>3</sub>                |
|          | 575.2534            | -1.9           | 11.5 | C <sub>28</sub> H <sub>39</sub> O <sub>7</sub> N <sub>4</sub> S <sub>1</sub>  |
|          | 575.2507            | 2.8            | 7.0  | C <sub>25</sub> H <sub>41</sub> O <sub>10</sub> N <sub>3</sub> S <sub>1</sub> |
|          | 575.2507            | 2.8            | 12.5 | C <sub>24</sub> H <sub>35</sub> O <sub>5</sub> N <sub>10</sub> S <sub>1</sub> |
|          | 575.2539            | -2.8           | -1.0 | C <sub>14</sub> H <sub>41</sub> O <sub>13</sub> N <sub>9</sub> S <sub>1</sub> |
|          | 575.2505            | 3.1            | 4.0  | C <sub>17</sub> H <sub>37</sub> O <sub>13</sub> N <sub>9</sub>                |
|          | 575.2541            | -3.1           | 7.5  | C <sub>21</sub> H <sub>39</sub> O <sub>5</sub> N <sub>10</sub> S <sub>2</sub> |
|          | 575.2541            | -3.1           | 2.0  | C <sub>22</sub> H <sub>45</sub> O <sub>10</sub> N <sub>3</sub> S <sub>2</sub> |
|          | 575.2501            | 3.9            | -2.0 | C <sub>17</sub> H <sub>45</sub> O <sub>12</sub> N <sub>5</sub> S <sub>2</sub> |
|          | 575.2546            | -3.9           | 8.0  | C <sub>22</sub> H <sub>37</sub> O <sub>11</sub> N <sub>7</sub>                |
|          | 575.2547            | -4.2           | 16.5 | C <sub>29</sub> H <sub>35</sub> O <sub>3</sub> N <sub>8</sub> S <sub>1</sub>  |
|          | 575.2547            | -4.2           | 11.0 | C <sub>29</sub> H <sub>41</sub> O <sub>8</sub> N <sub>1</sub> S <sub>1</sub>  |
|          | 575.2496            | 4.8            | 16.0 | C <sub>30</sub> H <sub>37</sub> O <sub>1</sub> N <sub>7</sub> S <sub>2</sub>  |

aet7-47 MW=616?  
(DCM)/MeOH + NH4OAc

# Compound 52

EPSRC National Centre Swansea  
LTQ Orbitrap XL

adam throup  
13/01/2012 14:40:48

BRASHE180-OV-HNESP #20-33 RT: 0.87-1.26 AV: 14 NL: 2.51E6

T: FTMS + p NSI Full ms [120.00-2000.00]

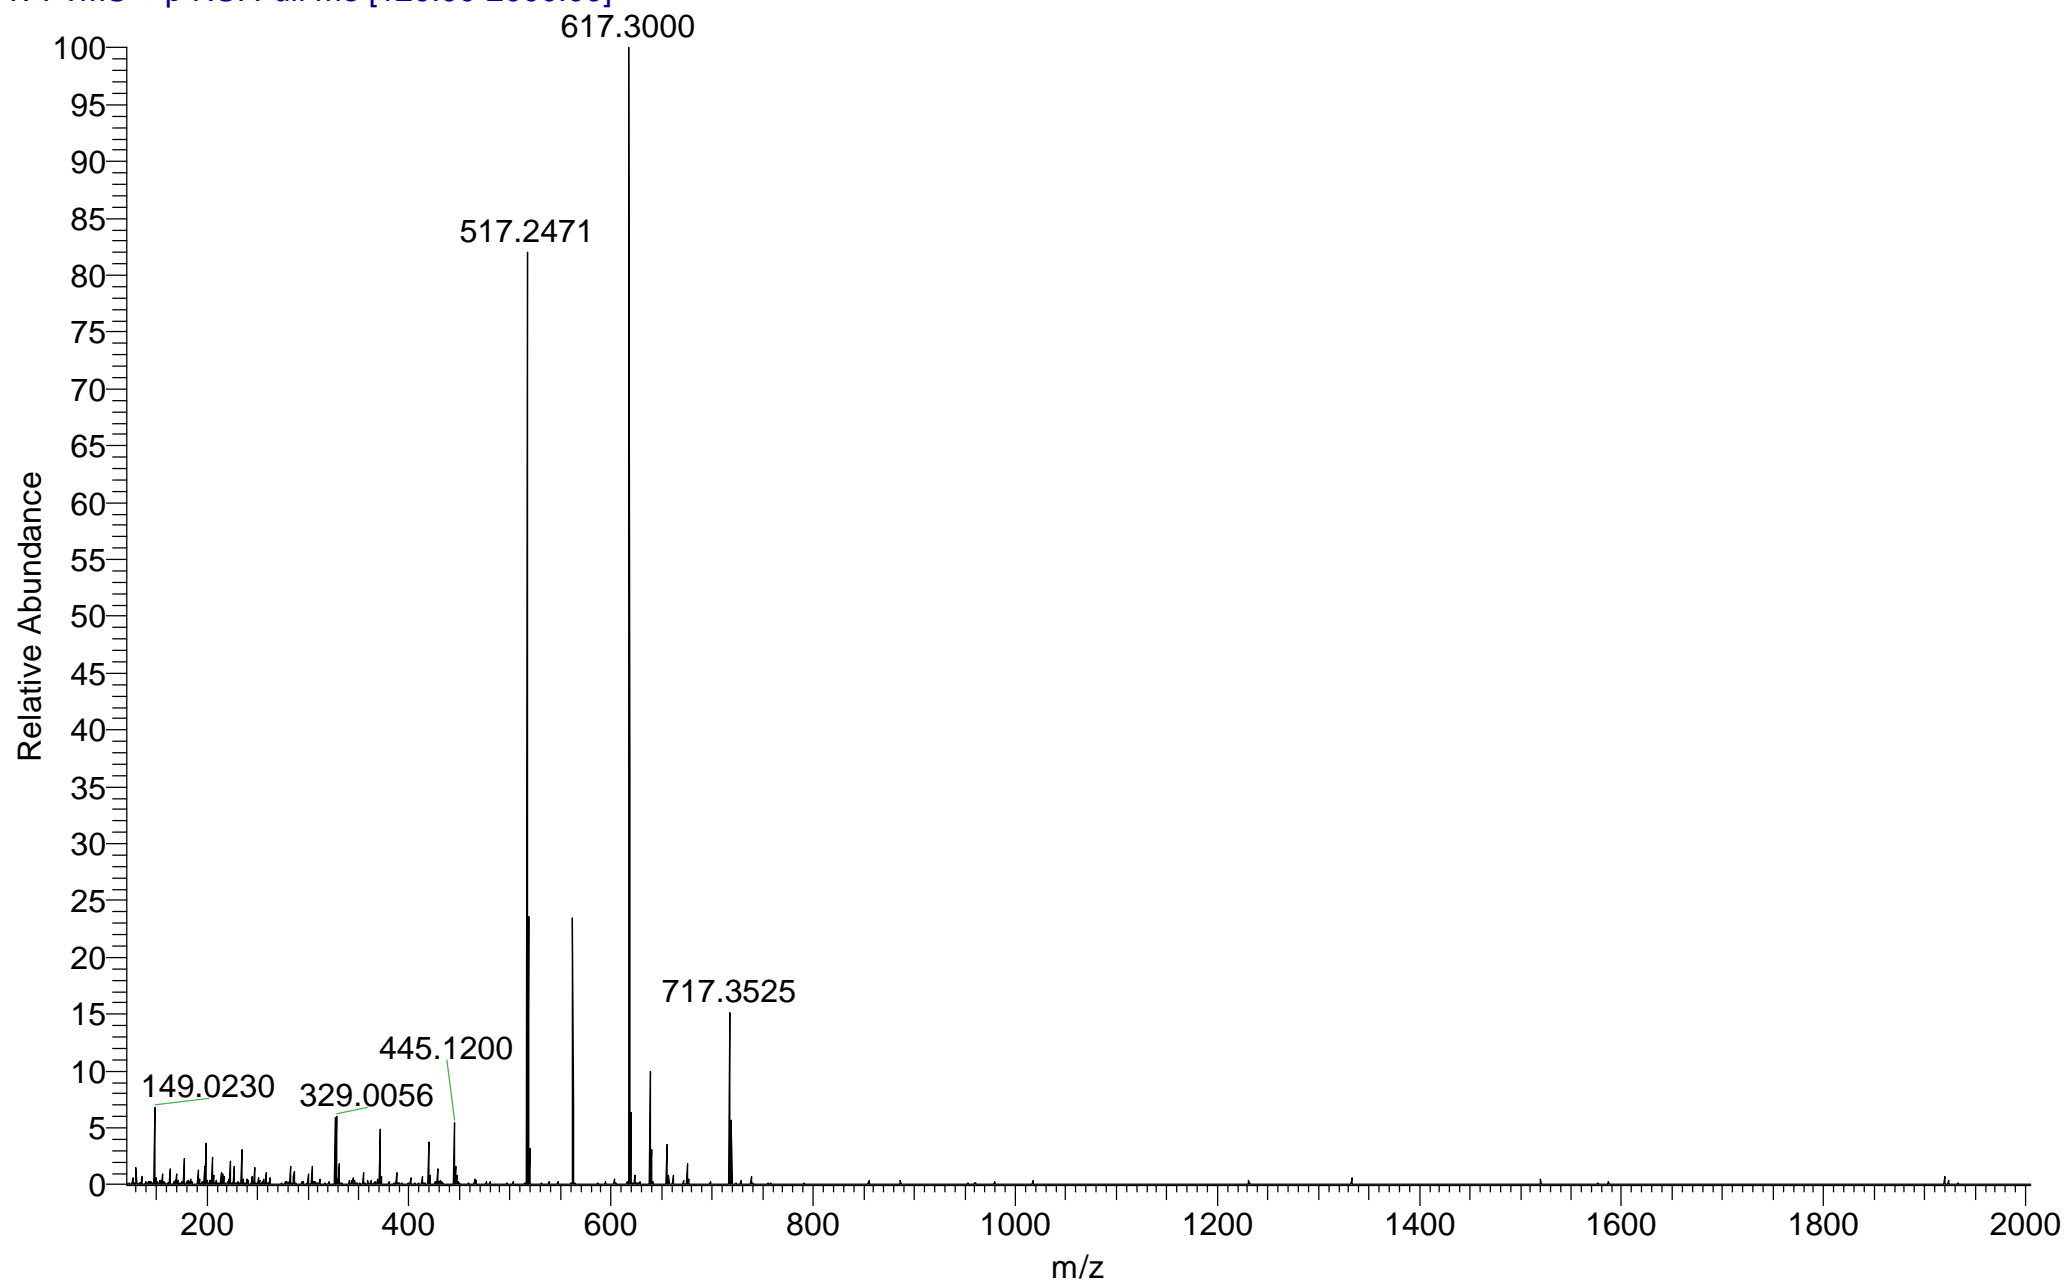

aet7-47 MW=616?  
(DCM)/MeOH + NH<sub>4</sub>OAc

EPSRC National Centre Swansea  
LTQ Orbitrap XL

adam throup  
13/01/2012 14:40:48

BRASHE180-OV-HNESP #20-33 RT: 0.87-1.26 AV: 14 NL: 2.51E6

T: FTMS + p NSI Full ms [120.00-2000.00]

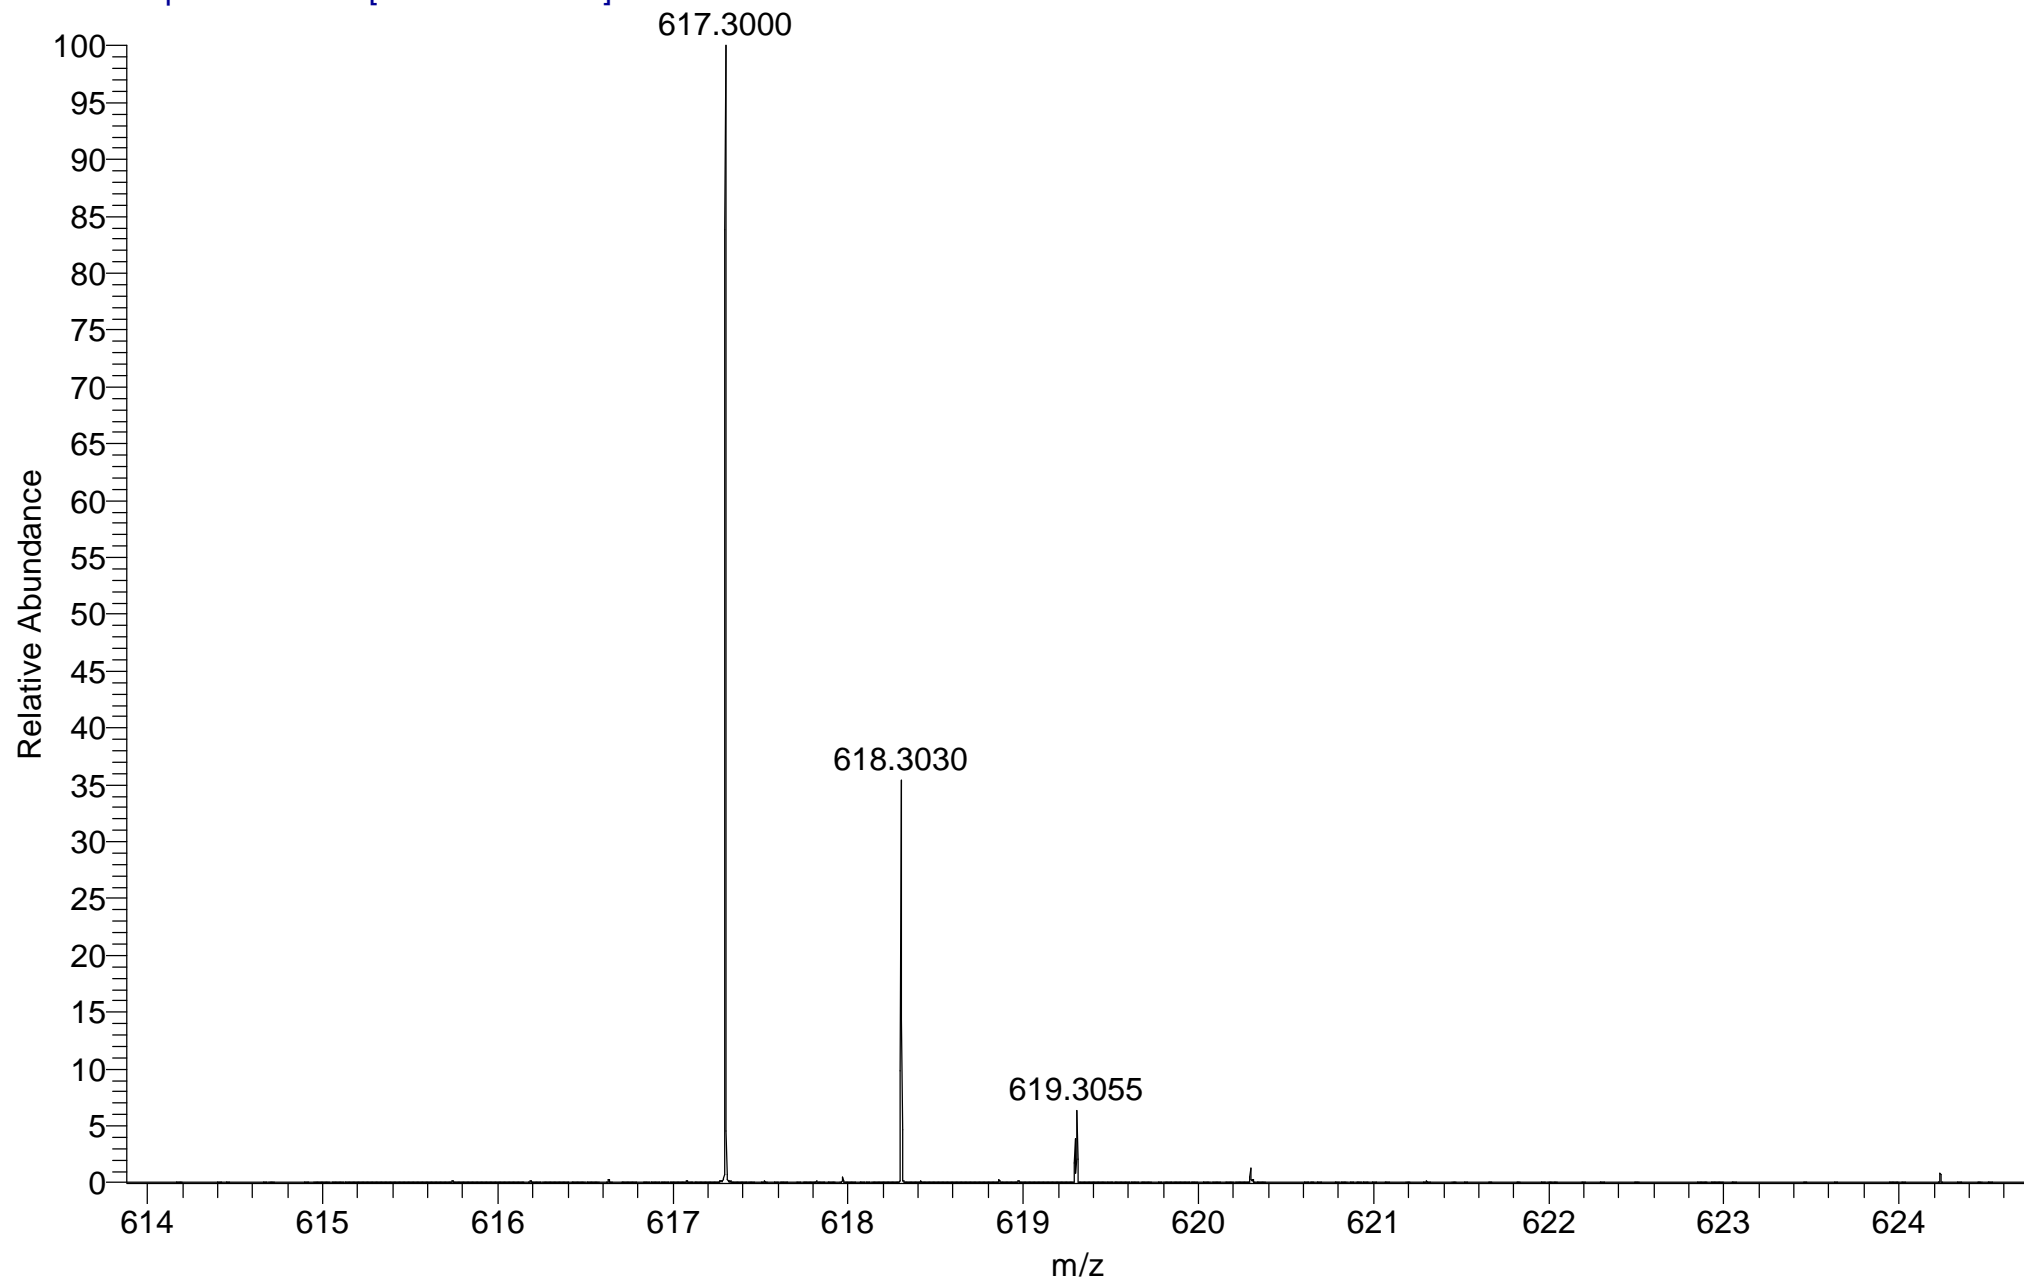

Isotope:                   Min. .. Max.  
 14 N                       0....10  
 16 O                       0....15  
 12 C                       0....40  
 1 H                         0....60  
 23 Na                      0....0  
 32 S                       0....2  
 Tolerance Window:       +- 5.00 ppm  
 Db/Ring Equiv:           -3..100  
 Fits:                      100

N-Rule: Do not use  
 Charge: 1

| Mass     | Theoretical<br>Mass | Delta<br>[ppm] | RDB  | Composition                                                                   |
|----------|---------------------|----------------|------|-------------------------------------------------------------------------------|
| 617.3000 | 617.3002            | -0.3           | 8.5  | C <sub>23</sub> H <sub>41</sub> O <sub>10</sub> N <sub>10</sub>               |
|          | 617.3002            | -0.3           | 3.0  | C <sub>24</sub> H <sub>47</sub> O <sub>15</sub> N <sub>3</sub>                |
|          | 617.2997            | 0.5            | 2.5  | C <sub>23</sub> H <sub>49</sub> O <sub>9</sub> N <sub>6</sub> S <sub>2</sub>  |
|          | 617.2997            | 0.6            | 21.0 | C <sub>37</sub> H <sub>39</sub> O <sub>4</sub> N <sub>5</sub>                 |
|          | 617.3003            | -0.6           | 11.5 | C <sub>31</sub> H <sub>45</sub> O <sub>7</sub> N <sub>4</sub> S <sub>1</sub>  |
|          | 617.2992            | 1.3            | 15.0 | C <sub>37</sub> H <sub>47</sub> O <sub>3</sub> N <sub>1</sub> S <sub>2</sub>  |
|          | 617.3009            | -1.4           | -1.0 | C <sub>17</sub> H <sub>47</sub> O <sub>13</sub> N <sub>9</sub> S <sub>1</sub> |
|          | 617.2990            | 1.6            | 6.5  | C <sub>30</sub> H <sub>49</sub> O <sub>11</sub> S <sub>1</sub>                |
|          | 617.3010            | -1.6           | 26.0 | C <sub>38</sub> H <sub>35</sub> N <sub>9</sub>                                |
|          | 617.2990            | 1.6            | 12.0 | C <sub>29</sub> H <sub>43</sub> O <sub>6</sub> N <sub>7</sub> S <sub>1</sub>  |
|          | 617.3010            | -1.6           | 20.5 | C <sub>39</sub> H <sub>41</sub> O <sub>5</sub> N <sub>2</sub>                 |
|          | 617.3010            | -1.7           | 7.5  | C <sub>24</sub> H <sub>45</sub> O <sub>5</sub> N <sub>10</sub> S <sub>2</sub> |
|          | 617.3010            | -1.7           | 2.0  | C <sub>25</sub> H <sub>51</sub> O <sub>10</sub> N <sub>3</sub> S <sub>2</sub> |
|          | 617.2988            | 1.9            | 3.5  | C <sub>22</sub> H <sub>45</sub> O <sub>14</sub> N <sub>6</sub>                |
|          | 617.3015            | -2.4           | 8.0  | C <sub>25</sub> H <sub>43</sub> O <sub>11</sub> N <sub>7</sub>                |
|          | 617.2984            | 2.7            | -2.5 | C <sub>22</sub> H <sub>53</sub> O <sub>13</sub> N <sub>2</sub> S <sub>2</sub> |
|          | 617.2984            | 2.7            | 3.0  | C <sub>21</sub> H <sub>47</sub> O <sub>8</sub> N <sub>9</sub> S <sub>2</sub>  |
|          | 617.2983            | 2.7            | 16.0 | C <sub>36</sub> H <sub>43</sub> O <sub>8</sub> N <sub>1</sub>                 |
|          | 617.3017            | -2.7           | 16.5 | C <sub>32</sub> H <sub>41</sub> O <sub>3</sub> N <sub>8</sub> S <sub>1</sub>  |
|          | 617.2983            | 2.7            | 21.5 | C <sub>35</sub> H <sub>37</sub> O <sub>3</sub> N <sub>8</sub>                 |
|          | 617.3017            | -2.7           | 11.0 | C <sub>33</sub> H <sub>47</sub> O <sub>8</sub> N <sub>1</sub> S <sub>1</sub>  |
|          | 617.3019            | -3.0           | 19.5 | C <sub>40</sub> H <sub>45</sub> N <sub>2</sub> S <sub>2</sub>                 |
|          | 617.2978            | 3.5            | 15.5 | C <sub>35</sub> H <sub>45</sub> O <sub>2</sub> N <sub>4</sub> S <sub>2</sub>  |
|          | 617.3022            | -3.6           | -1.5 | C <sub>19</sub> H <sub>49</sub> O <sub>14</sub> N <sub>6</sub> S <sub>1</sub> |
|          | 617.2977            | 3.8            | 7.0  | C <sub>28</sub> H <sub>47</sub> O <sub>10</sub> N <sub>3</sub> S <sub>1</sub> |
|          | 617.3023            | -3.8           | 25.5 | C <sub>40</sub> H <sub>37</sub> O <sub>1</sub> N <sub>6</sub>                 |
|          | 617.2977            | 3.8            | 12.5 | C <sub>27</sub> H <sub>41</sub> O <sub>5</sub> N <sub>10</sub> S <sub>1</sub> |
|          | 617.3024            | -3.8           | 7.0  | C <sub>26</sub> H <sub>47</sub> O <sub>6</sub> N <sub>7</sub> S <sub>2</sub>  |
|          | 617.3024            | -3.9           | 1.5  | C <sub>27</sub> H <sub>53</sub> O <sub>11</sub> S <sub>2</sub>                |
|          | 617.2975            | 4.1            | 4.0  | C <sub>20</sub> H <sub>43</sub> O <sub>13</sub> N <sub>9</sub>                |
|          | 617.3028            | -4.6           | 7.5  | C <sub>27</sub> H <sub>45</sub> O <sub>12</sub> N <sub>4</sub>                |

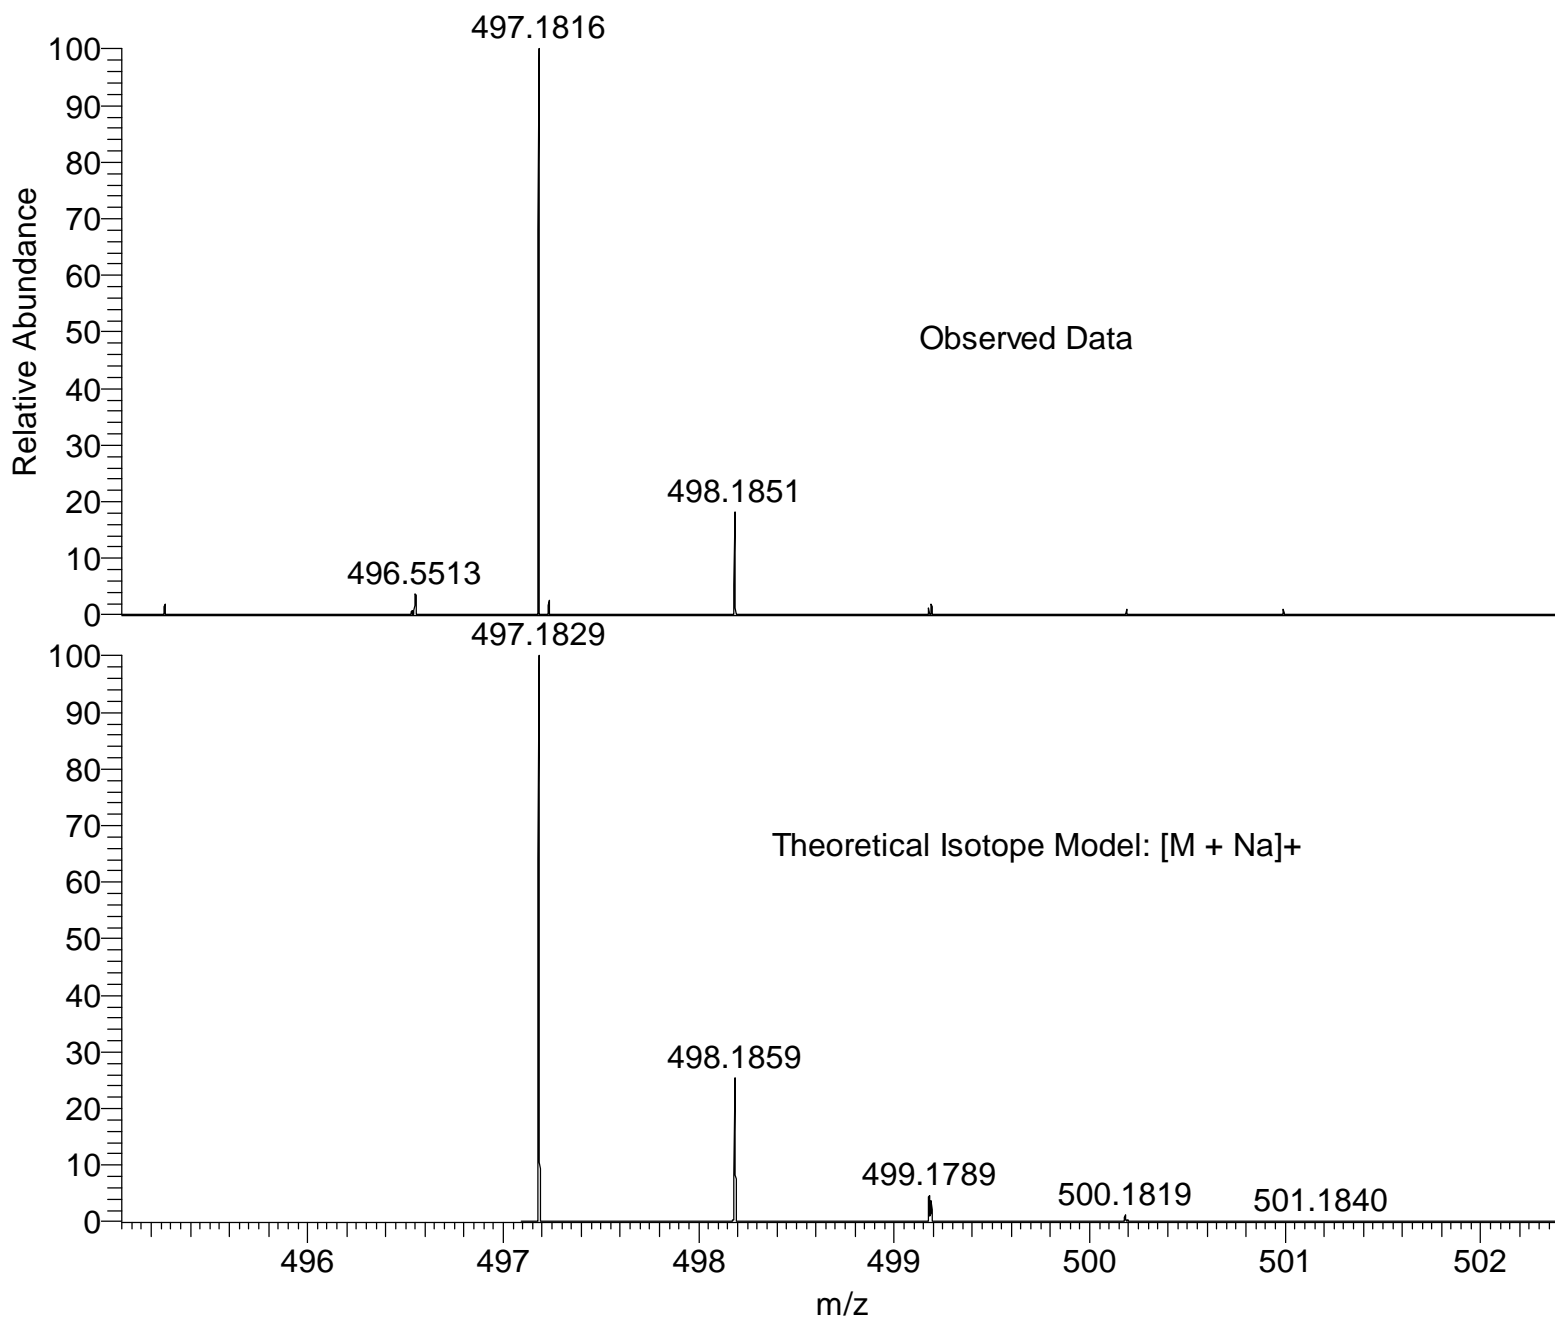

NL:  
1.20E5  
BRASHE179-OV-HNESP#25  
RT: 1.02 AV: 1 T: FTMS + p  
NSI Full ms [120.00-2000.00]

NL:  
1.69E4  
C<sub>23</sub> H<sub>30</sub> N<sub>4</sub> O<sub>5</sub> SNa:  
C<sub>23</sub> H<sub>30</sub> N<sub>4</sub> O<sub>5</sub> S<sub>1</sub> Na<sub>1</sub>  
p (gss, s /p:40) Chrg 1  
R: 100000 Res .Pwr . @FWHM

Isotope:           Min. .. Max.  
 14 N               0....10  
 16 O               0....15  
 12 C               0....30  
 1 H                0....60  
 23 Na              0....1  
 32 S               0....2  
 Tolerance Window: +- 5.00 ppm  
 Db/Ring Equiv:   -3..100  
 Fits:              100

N-Rule: Do not use  
 Charge: 1

| Mass     | Theoretical<br>Mass | Delta<br>[ppm] | RDB  | Composition                                                                                   |
|----------|---------------------|----------------|------|-----------------------------------------------------------------------------------------------|
| 497.1816 | 497.1816            | 0.1            | 5.5  | C <sub>22</sub> H <sub>34</sub> O <sub>9</sub> Na <sub>1</sub> S <sub>1</sub>                 |
|          | 497.1816            | 0.1            | 11.0 | C <sub>21</sub> H <sub>28</sub> O <sub>4</sub> N <sub>7</sub> Na <sub>1</sub> S <sub>1</sub>  |
|          | 497.1815            | 0.2            | 12.5 | C <sub>28</sub> H <sub>33</sub> O <sub>4</sub> S <sub>2</sub>                                 |
|          | 497.1818            | -0.3           | 14.0 | C <sub>29</sub> H <sub>32</sub> O <sub>1</sub> N <sub>1</sub> Na <sub>1</sub> S <sub>2</sub>  |
|          | 497.1814            | 0.4            | 2.5  | C <sub>14</sub> H <sub>30</sub> O <sub>12</sub> N <sub>6</sub> Na <sub>1</sub>                |
|          | 497.1813            | 0.6            | 9.5  | C <sub>20</sub> H <sub>29</sub> O <sub>7</sub> N <sub>6</sub> S <sub>1</sub>                  |
|          | 497.1819            | -0.7           | 18.5 | C <sub>28</sub> H <sub>25</sub> O <sub>5</sub> N <sub>4</sub>                                 |
|          | 497.1820            | -0.8           | 0.0  | C <sub>14</sub> H <sub>35</sub> O <sub>10</sub> N <sub>5</sub> S <sub>2</sub>                 |
|          | 497.1811            | 1.0            | 1.0  | C <sub>13</sub> H <sub>31</sub> O <sub>15</sub> N <sub>5</sub>                                |
|          | 497.1822            | -1.2           | 20.0 | C <sub>29</sub> H <sub>24</sub> O <sub>2</sub> N <sub>5</sub> Na <sub>1</sub>                 |
|          | 497.1823            | -1.3           | 1.5  | C <sub>15</sub> H <sub>34</sub> O <sub>7</sub> N <sub>6</sub> Na <sub>1</sub> S <sub>2</sub>  |
|          | 497.1809            | 1.4            | 2.0  | C <sub>13</sub> H <sub>32</sub> O <sub>6</sub> N <sub>9</sub> Na <sub>1</sub> S <sub>2</sub>  |
|          | 497.1809            | 1.4            | 15.0 | C <sub>28</sub> H <sub>28</sub> O <sub>6</sub> N <sub>1</sub> Na <sub>1</sub>                 |
|          | 497.1809            | 1.5            | 20.5 | C <sub>27</sub> H <sub>22</sub> O <sub>1</sub> N <sub>8</sub> Na <sub>1</sub>                 |
|          | 497.1825            | -1.7           | 6.0  | C <sub>14</sub> H <sub>27</sub> O <sub>11</sub> N <sub>9</sub>                                |
|          | 497.1806            | 1.9            | 0.5  | C <sub>12</sub> H <sub>33</sub> O <sub>9</sub> N <sub>8</sub> S <sub>2</sub>                  |
|          | 497.1806            | 2.0            | 13.5 | C <sub>27</sub> H <sub>29</sub> O <sub>9</sub>                                                |
|          | 497.1806            | 2.0            | 19.0 | C <sub>26</sub> H <sub>23</sub> O <sub>4</sub> N <sub>7</sub>                                 |
|          | 497.1826            | -2.1           | 14.5 | C <sub>21</sub> H <sub>25</sub> O <sub>3</sub> N <sub>10</sub> S <sub>1</sub>                 |
|          | 497.1826            | -2.1           | 9.0  | C <sub>22</sub> H <sub>31</sub> O <sub>8</sub> N <sub>3</sub> S <sub>1</sub>                  |
|          | 497.1827            | -2.3           | 7.5  | C <sub>15</sub> H <sub>26</sub> O <sub>8</sub> N <sub>10</sub> Na <sub>1</sub>                |
|          | 497.1827            | -2.3           | 2.0  | C <sub>16</sub> H <sub>32</sub> O <sub>13</sub> N <sub>3</sub> Na <sub>1</sub>                |
|          | 497.1804            | 2.4            | 14.5 | C <sub>27</sub> H <sub>30</sub> N <sub>4</sub> Na <sub>1</sub> S <sub>2</sub>                 |
|          | 497.1828            | -2.4           | 17.5 | C <sub>29</sub> H <sub>29</sub> N <sub>4</sub> S <sub>2</sub>                                 |
|          | 497.1829            | -2.6           | 10.5 | C <sub>23</sub> H <sub>30</sub> O <sub>5</sub> N <sub>4</sub> Na <sub>1</sub> S <sub>1</sub>  |
|          | 497.1802            | 2.8            | 6.0  | C <sub>20</sub> H <sub>32</sub> O <sub>8</sub> N <sub>3</sub> Na <sub>1</sub> S <sub>1</sub>  |
|          | 497.1802            | 2.8            | 11.5 | C <sub>19</sub> H <sub>26</sub> O <sub>3</sub> N <sub>10</sub> Na <sub>1</sub> S <sub>1</sub> |
|          | 497.1801            | 2.9            | 13.0 | C <sub>26</sub> H <sub>31</sub> O <sub>3</sub> N <sub>3</sub> S <sub>2</sub>                  |
|          | 497.1800            | 3.1            | 3.0  | C <sub>12</sub> H <sub>28</sub> O <sub>11</sub> N <sub>9</sub> Na <sub>1</sub>                |
|          | 497.1800            | 3.3            | 4.5  | C <sub>19</sub> H <sub>33</sub> O <sub>11</sub> N <sub>2</sub> S <sub>1</sub>                 |
|          | 497.1800            | 3.3            | 10.0 | C <sub>18</sub> H <sub>27</sub> O <sub>6</sub> N <sub>9</sub> S <sub>1</sub>                  |

| Mass     | Theoretical<br>Mass | Delta<br>[ppm] | RDB  | Composition                                                                                   |
|----------|---------------------|----------------|------|-----------------------------------------------------------------------------------------------|
| 497.1833 | 497.1833            | -3.4           | 23.5 | C <sub>29</sub> H <sub>21</sub> O <sub>1</sub> N <sub>8</sub>                                 |
| 497.1833 | 497.1833            | -3.4           | 18.0 | C <sub>30</sub> H <sub>27</sub> O <sub>6</sub> N <sub>1</sub>                                 |
| 497.1833 | 497.1833            | -3.5           | 5.0  | C <sub>15</sub> H <sub>31</sub> O <sub>6</sub> N <sub>9</sub> S <sub>2</sub>                  |
| 497.1833 | 497.1833            | -3.5           | -0.5 | C <sub>16</sub> H <sub>37</sub> O <sub>11</sub> N <sub>2</sub> S <sub>2</sub>                 |
| 497.1834 | 497.1834            | -3.7           | -2.0 | C <sub>9</sub> H <sub>32</sub> O <sub>11</sub> N <sub>9</sub> Na <sub>1</sub> S <sub>1</sub>  |
| 497.1798 | 497.1798            | 3.7            | 1.5  | C <sub>11</sub> H <sub>29</sub> O <sub>14</sub> N <sub>8</sub>                                |
| 497.1836 | 497.1836            | -4.0           | 6.5  | C <sub>16</sub> H <sub>30</sub> O <sub>3</sub> N <sub>10</sub> Na <sub>1</sub> S <sub>2</sub> |
| 497.1836 | 497.1836            | -4.0           | 1.0  | C <sub>17</sub> H <sub>36</sub> O <sub>8</sub> N <sub>3</sub> Na <sub>1</sub> S <sub>2</sub>  |
| 497.1796 | 497.1796            | 4.1            | -3.0 | C <sub>12</sub> H <sub>36</sub> O <sub>10</sub> N <sub>5</sub> Na <sub>1</sub> S <sub>2</sub> |
| 497.1795 | 497.1795            | 4.1            | 15.5 | C <sub>26</sub> H <sub>26</sub> O <sub>5</sub> N <sub>4</sub> Na <sub>1</sub>                 |
| 497.1838 | 497.1838            | -4.4           | 5.5  | C <sub>16</sub> H <sub>29</sub> O <sub>12</sub> N <sub>6</sub>                                |
| 497.1793 | 497.1793            | 4.7            | 14.0 | C <sub>25</sub> H <sub>27</sub> O <sub>8</sub> N <sub>3</sub>                                 |
| 497.1793 | 497.1793            | 4.7            | 19.5 | C <sub>24</sub> H <sub>21</sub> O <sub>3</sub> N <sub>10</sub>                                |
| 497.1840 | 497.1840            | -4.8           | 14.0 | C <sub>23</sub> H <sub>27</sub> O <sub>4</sub> N <sub>7</sub> S <sub>1</sub>                  |
| 497.1840 | 497.1840            | -4.8           | 8.5  | C <sub>24</sub> H <sub>33</sub> O <sub>9</sub> S <sub>1</sub>                                 |
| 497.1841 | 497.1841            | -5.0           | 7.0  | C <sub>17</sub> H <sub>28</sub> O <sub>9</sub> N <sub>7</sub> Na <sub>1</sub>                 |
| 497.1841 | 497.1841            | -5.0           | 1.5  | C <sub>18</sub> H <sub>34</sub> O <sub>14</sub> Na <sub>1</sub>                               |



| Mass | Theoretical<br>Mass | Delta<br>[ppm] | RDB | Composition |
|------|---------------------|----------------|-----|-------------|
|------|---------------------|----------------|-----|-------------|

| Mass | Theoretical<br>Mass | Delta<br>[ppm] | RDB | Composition |
|------|---------------------|----------------|-----|-------------|
|------|---------------------|----------------|-----|-------------|

aet7-49 MW=516?  
(DCM)/MeOH + NH4OAc

# Compound 54

EPSRC National Centre Swansea  
LTQ Orbitrap XL

adam throup  
13/01/2012 14:44:24

BRASHE181-OV-HNESP #21-33 RT: 0.89-1.24 AV: 13 NL: 2.30E7

T: FTMS + p NSI Full ms [120.00-2000.00]

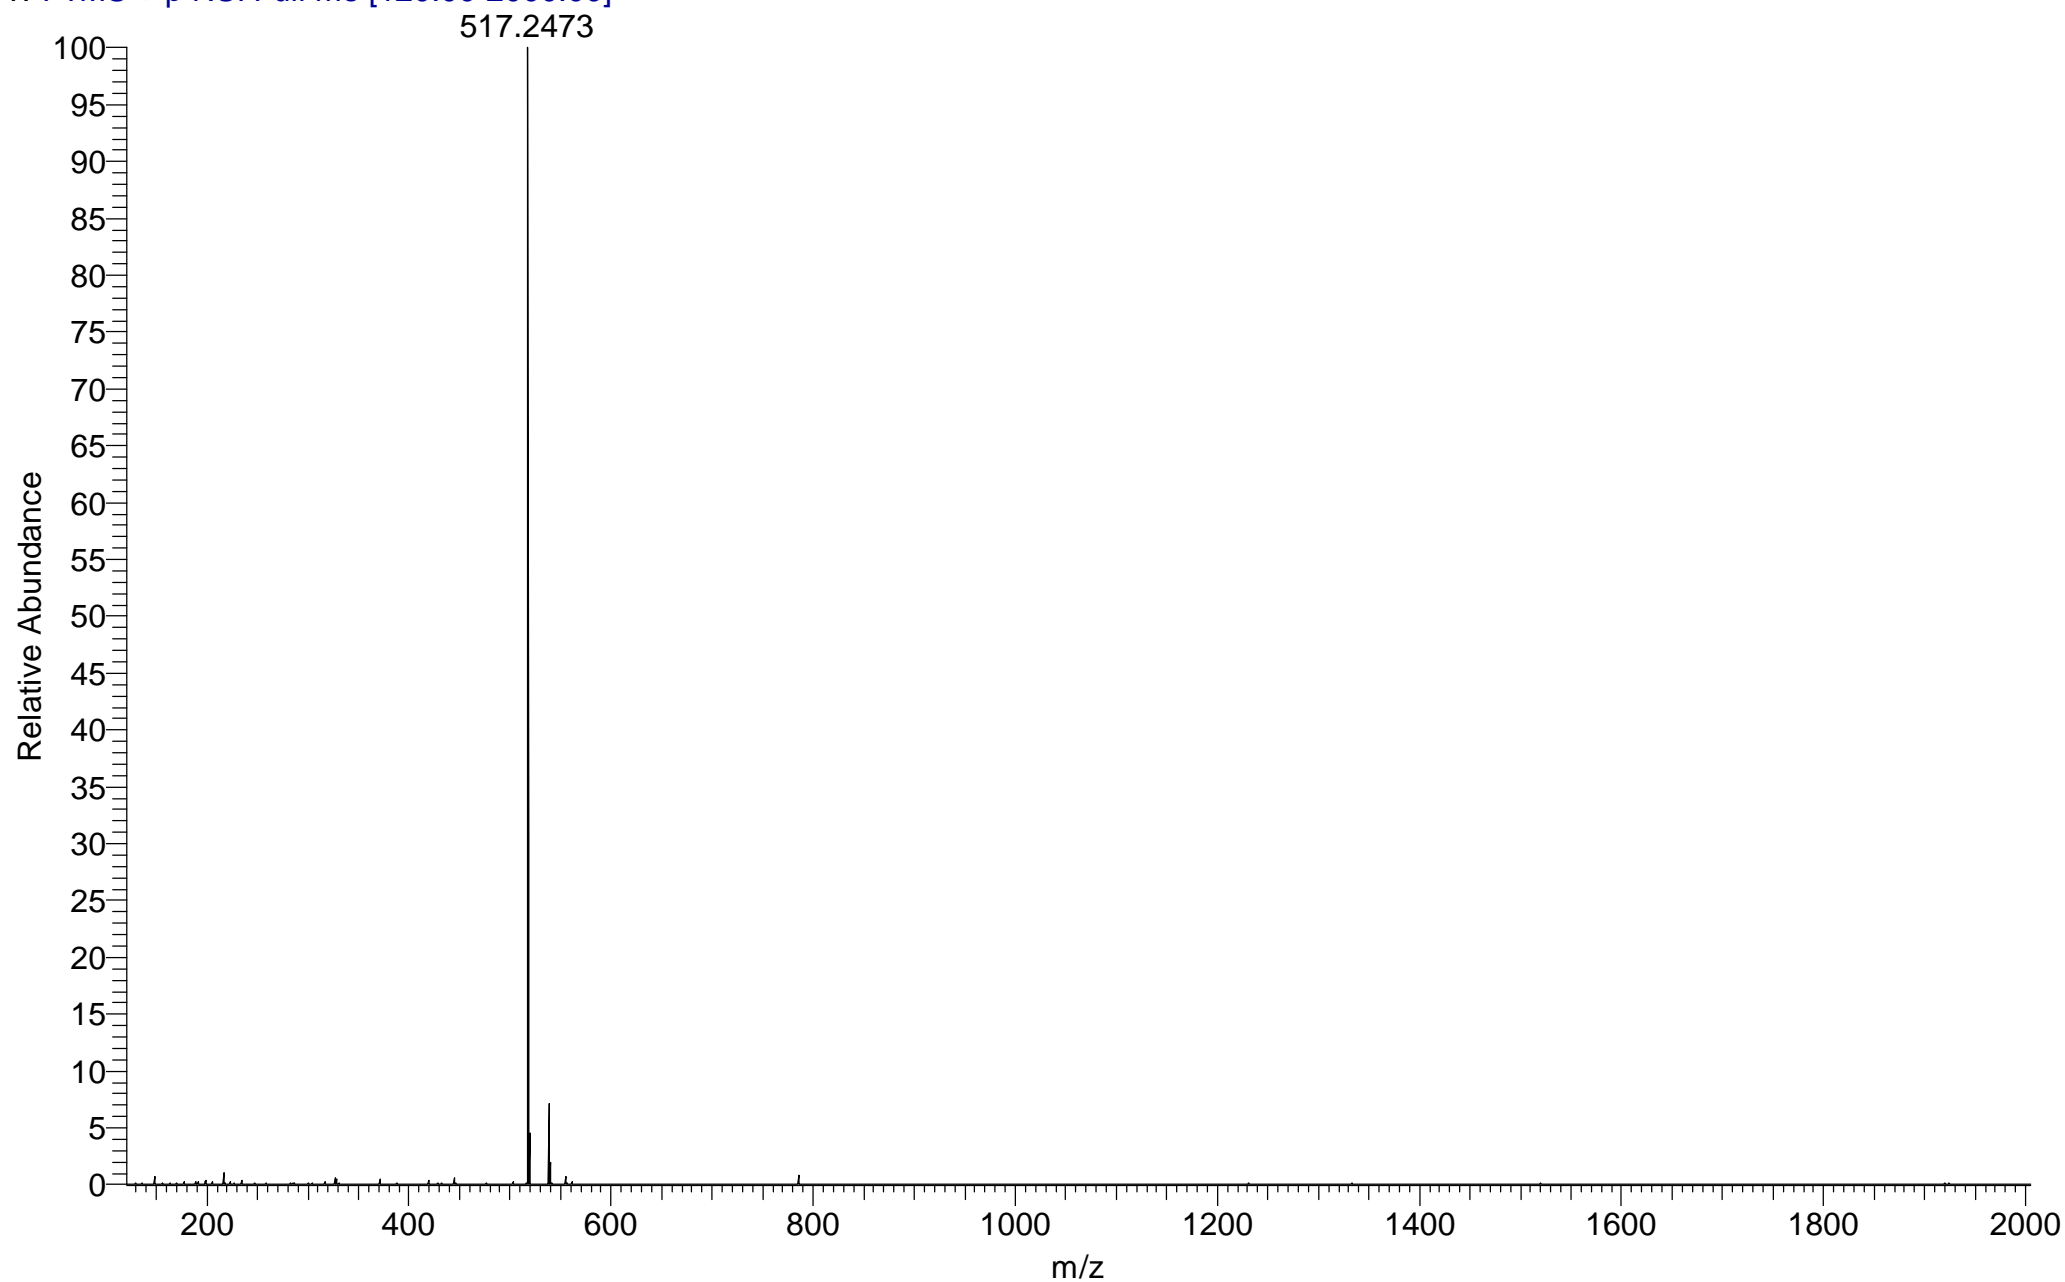

BRASHE181-OV-HNESP #21-33 RT: 0.89-1.24 AV: 13 NL: 2.30E7

T: FTMS + p NSI Full ms [120.00-2000.00]

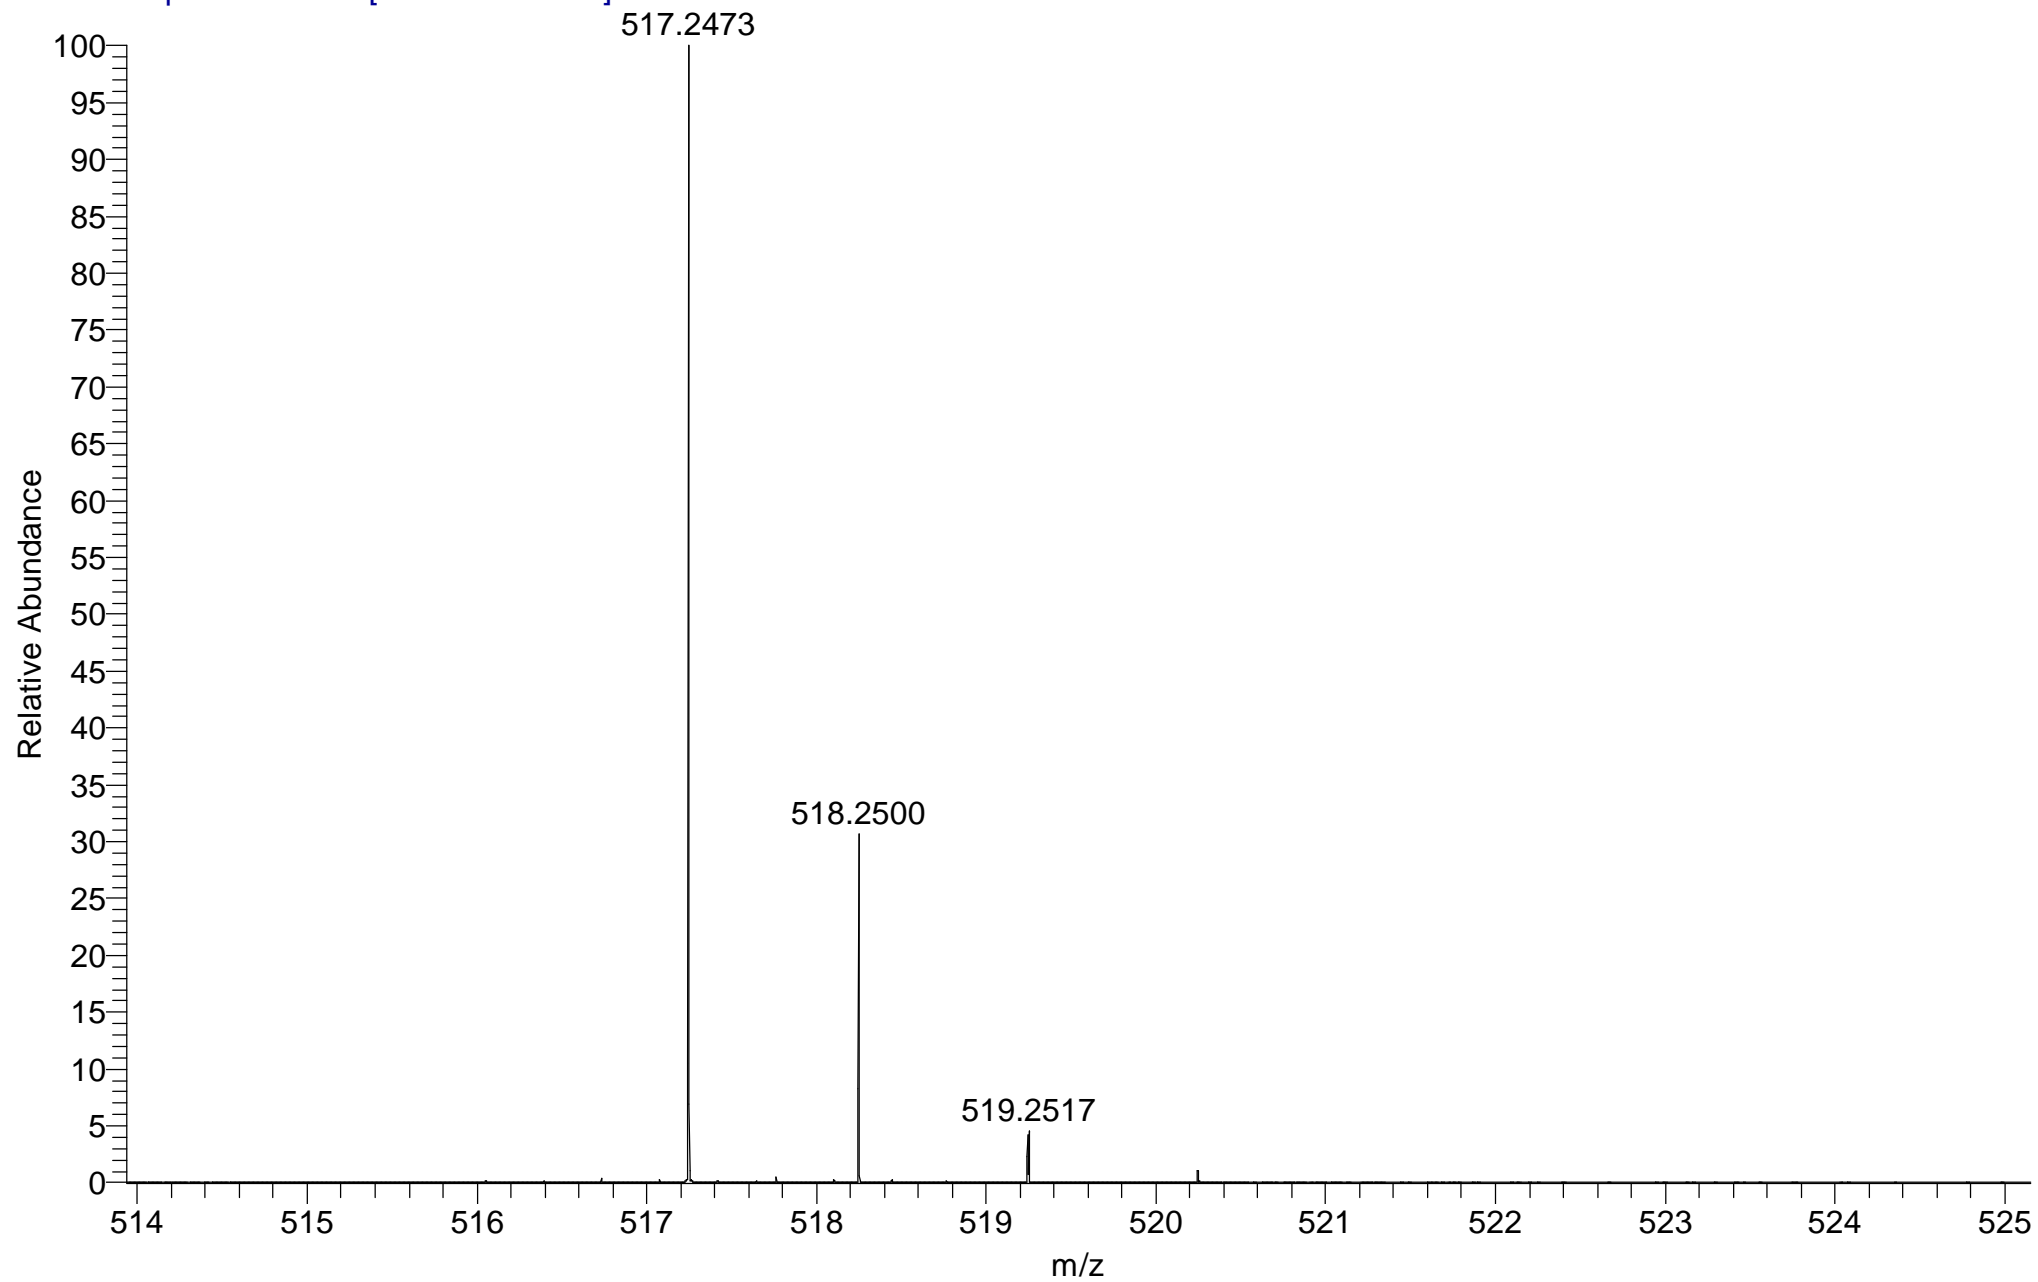

Isotope:           Min. .. Max.  
 14 N               0....10  
 16 O               0....15  
 12 C               0....40  
 1 H                0....60  
 23 Na              0....0  
 32 S               0....2  
 Tolerance Window: +- 5.00 ppm  
 Db/Ring Equiv:   -3..100  
 Fits:              100

N-Rule: Do not use  
 Charge: 1

| Mass     | Theoretical<br>Mass | Delta<br>[ppm] | RDB  | Composition                                                                   |
|----------|---------------------|----------------|------|-------------------------------------------------------------------------------|
| 517.2473 | 517.2473            | 0.1            | 1.5  | C <sub>18</sub> H <sub>41</sub> O <sub>7</sub> N <sub>6</sub> S <sub>2</sub>  |
|          | 517.2472            | 0.1            | 20.0 | C <sub>32</sub> H <sub>31</sub> O <sub>2</sub> N <sub>5</sub>                 |
|          | 517.2477            | -0.8           | 7.5  | C <sub>18</sub> H <sub>33</sub> O <sub>8</sub> N <sub>10</sub>                |
|          | 517.2477            | -0.8           | 2.0  | C <sub>19</sub> H <sub>39</sub> O <sub>13</sub> N <sub>3</sub>                |
|          | 517.2468            | 1.0            | 14.0 | C <sub>32</sub> H <sub>39</sub> O <sub>1</sub> N <sub>1</sub> S <sub>2</sub>  |
|          | 517.2479            | -1.2           | 10.5 | C <sub>26</sub> H <sub>37</sub> O <sub>5</sub> N <sub>4</sub> S <sub>1</sub>  |
|          | 517.2466            | 1.4            | 5.5  | C <sub>25</sub> H <sub>41</sub> O <sub>9</sub> S <sub>1</sub>                 |
|          | 517.2466            | 1.4            | 11.0 | C <sub>24</sub> H <sub>35</sub> O <sub>4</sub> N <sub>7</sub> S <sub>1</sub>  |
|          | 517.2464            | 1.7            | 2.5  | C <sub>17</sub> H <sub>37</sub> O <sub>12</sub> N <sub>6</sub>                |
|          | 517.2484            | -2.2           | -2.0 | C <sub>12</sub> H <sub>39</sub> O <sub>11</sub> N <sub>9</sub> S <sub>1</sub> |
|          | 517.2486            | -2.5           | 19.5 | C <sub>34</sub> H <sub>33</sub> O <sub>3</sub> N <sub>2</sub>                 |
|          | 517.2486            | -2.5           | 6.5  | C <sub>19</sub> H <sub>37</sub> O <sub>3</sub> N <sub>10</sub> S <sub>2</sub> |
|          | 517.2486            | -2.5           | 1.0  | C <sub>20</sub> H <sub>43</sub> O <sub>8</sub> N <sub>3</sub> S <sub>2</sub>  |
|          | 517.2459            | 2.7            | 2.0  | C <sub>16</sub> H <sub>39</sub> O <sub>6</sub> N <sub>9</sub> S <sub>2</sub>  |
|          | 517.2459            | 2.7            | 15.0 | C <sub>31</sub> H <sub>35</sub> O <sub>6</sub> N <sub>1</sub>                 |
|          | 517.2459            | 2.7            | 20.5 | C <sub>30</sub> H <sub>29</sub> O <sub>1</sub> N <sub>8</sub>                 |
|          | 517.2491            | -3.4           | 7.0  | C <sub>20</sub> H <sub>35</sub> O <sub>9</sub> N <sub>7</sub>                 |
|          | 517.2491            | -3.4           | 1.5  | C <sub>21</sub> H <sub>41</sub> O <sub>14</sub>                               |
|          | 517.2454            | 3.6            | 14.5 | C <sub>30</sub> H <sub>37</sub> N <sub>4</sub> S <sub>2</sub>                 |
|          | 517.2493            | -3.8           | 15.5 | C <sub>27</sub> H <sub>33</sub> O <sub>1</sub> N <sub>8</sub> S <sub>1</sub>  |
|          | 517.2493            | -3.8           | 10.0 | C <sub>28</sub> H <sub>39</sub> O <sub>6</sub> N <sub>1</sub> S <sub>1</sub>  |
|          | 517.2452            | 4.0            | 6.0  | C <sub>23</sub> H <sub>39</sub> O <sub>8</sub> N <sub>3</sub> S <sub>1</sub>  |
|          | 517.2452            | 4.0            | 11.5 | C <sub>22</sub> H <sub>33</sub> O <sub>3</sub> N <sub>10</sub> S <sub>1</sub> |
|          | 517.2451            | 4.3            | 3.0  | C <sub>15</sub> H <sub>35</sub> O <sub>11</sub> N <sub>9</sub>                |
|          | 517.2498            | -4.8           | -2.5 | C <sub>14</sub> H <sub>41</sub> O <sub>12</sub> N <sub>6</sub> S <sub>1</sub> |

15-187  
(MeOH)/MeOH+NH4OAc  
C25H34N4O5S

# Compound 55

EPSRC National Facility Swansea  
LTQ Orbitrap XL

BRASHE  
22/02/2017 15:50:57

BRASHE\_O88TR\_A #39-52 RT: 0.66-1.04 AV: 14 SM: 7G NL: 3.12E6  
T: FTMS + p NSI Full ms [120.00-1935.00]

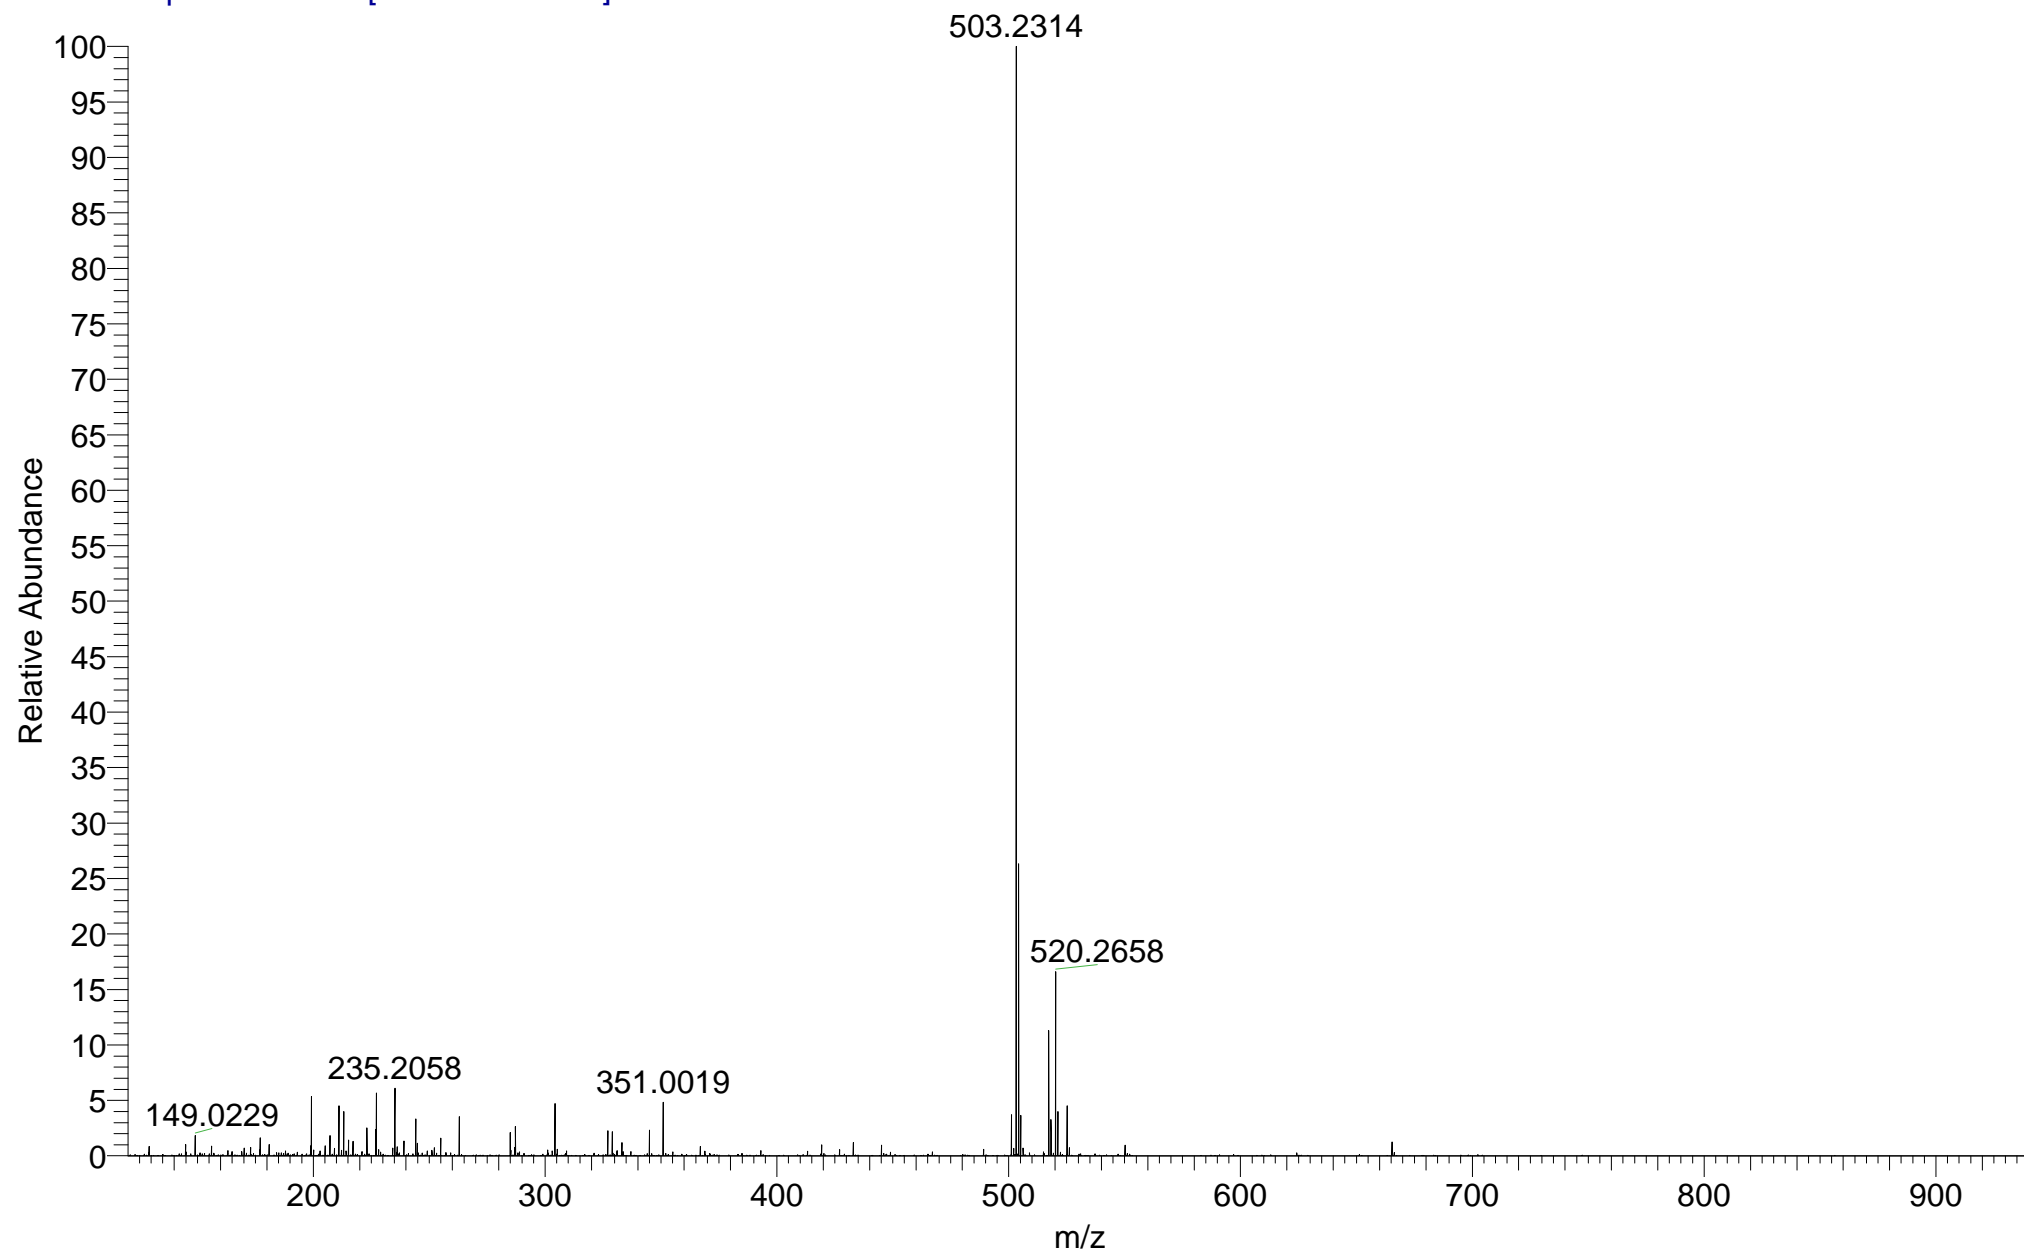

15-187  
(MeOH)/MeOH+NH4OAc  
C25H34N4O5S

EPSRC National Facility Swansea  
LTQ Orbitrap XL

BRASHE  
22/02/2017 15:50:57

BRASHE\_O88TR\_A #39-52 RT: 0.66-1.04 AV: 14 SM: 7G NL: 3.12E6  
T: FTMS + p NSI Full ms [120.00-1935.00]

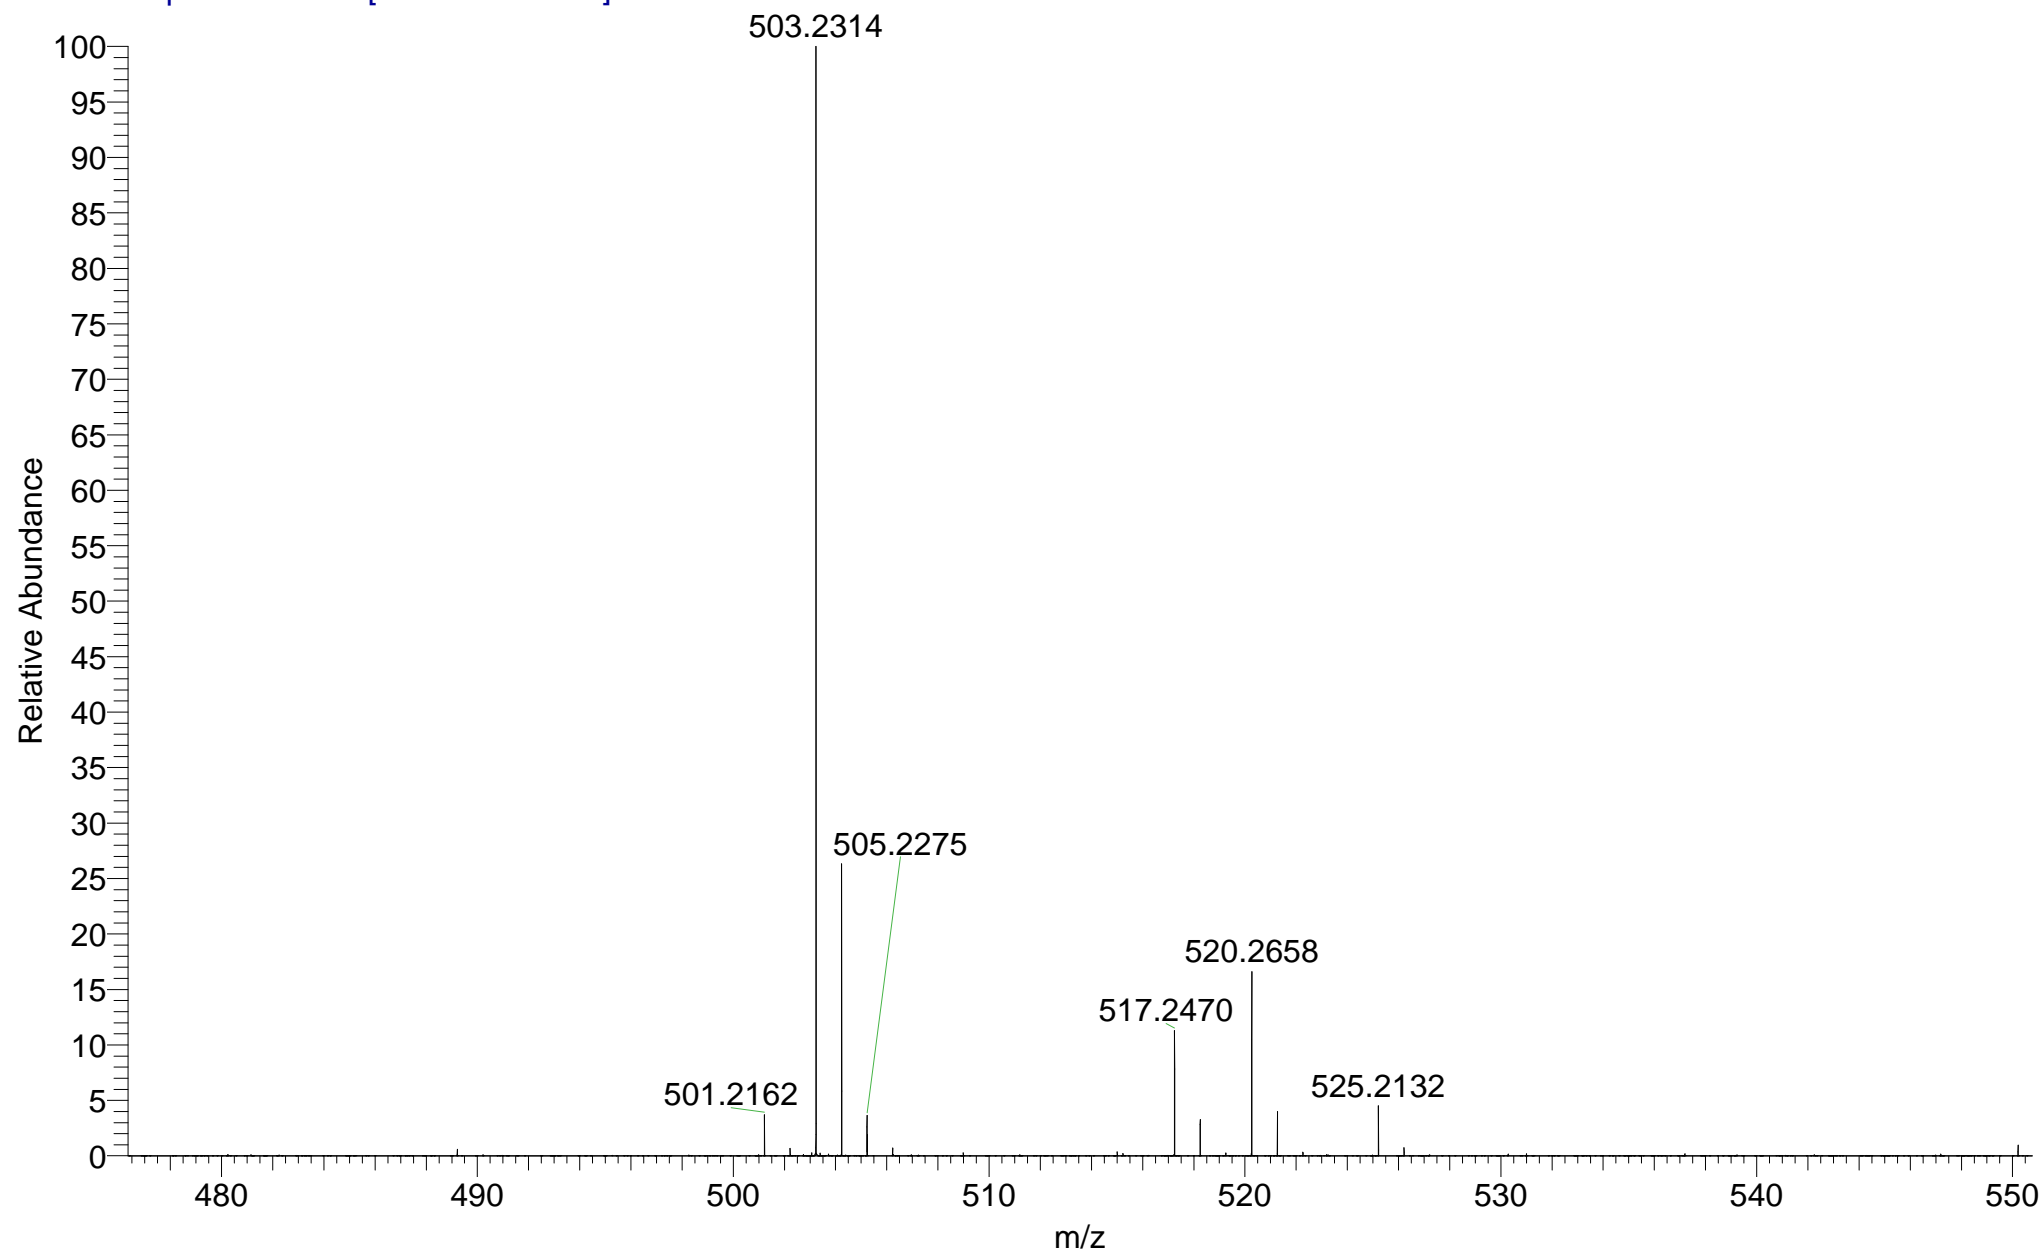

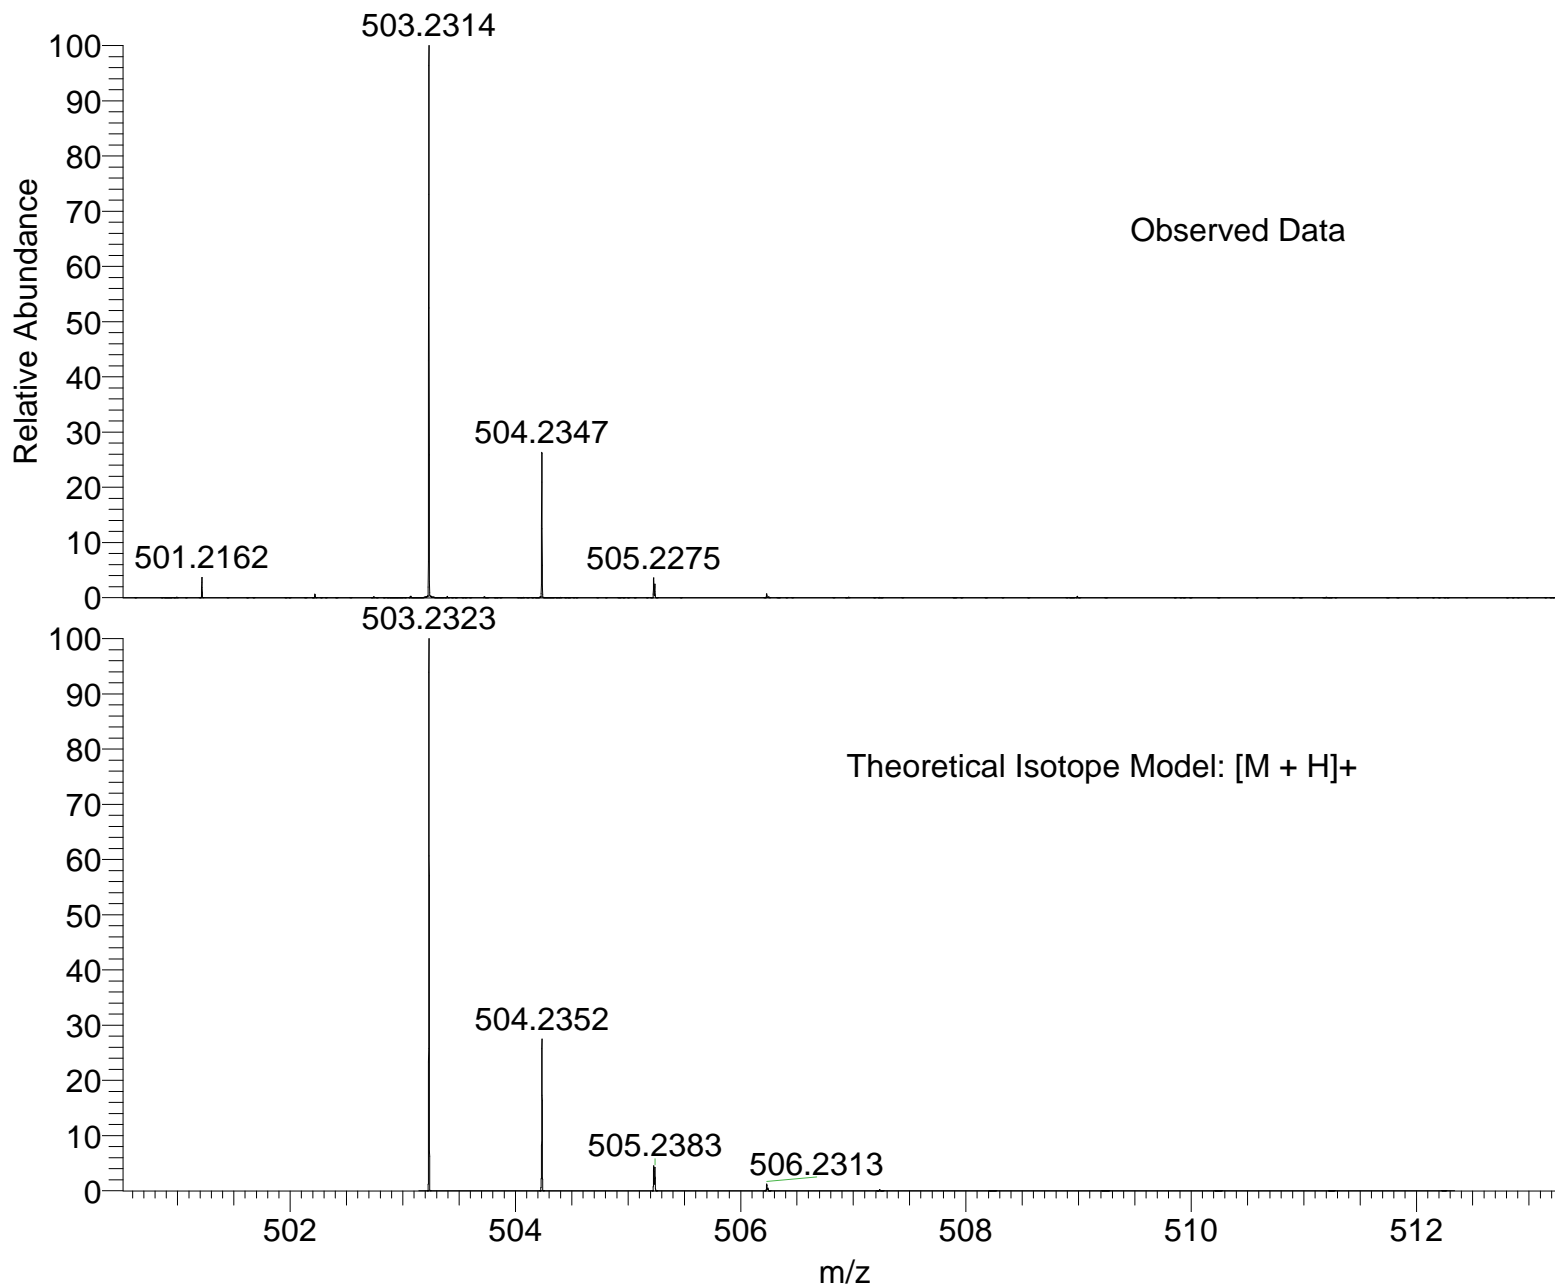

NL:  
3.12E6  
BRASHE\_O88TR\_A#39-52  
RT: 0.66-1.04 AV: 14 T: FTMS  
+ p NSI Full ms  
[120.00-1935.00]

NL:  
1.65E4  
C<sub>25</sub> H<sub>34</sub> N<sub>4</sub> O<sub>5</sub> SH:  
C<sub>25</sub> H<sub>35</sub> N<sub>4</sub> O<sub>5</sub> S<sub>1</sub>  
p (gss, s /p:40) Chrg 1  
R: 100000 Res .Pwr . @FWHM



Isotope:           Min. .. Max.  
 14 N               0....15  
 16 O               0....15  
 12 C               0....60  
 1 H                0....70  
 23 Na              0....0  
 32 S               0....5  
 Tolerance Window: +- 5.00 ppm  
 Db/Ring Equiv:   -3.. 100  
 Fits:              150

N-Rule: Do not use  
 Charge: 1

| Mass     | Theoretical<br>Mass | Delta<br>[ppm] | RDB  | Composition                                                                   |
|----------|---------------------|----------------|------|-------------------------------------------------------------------------------|
| 503.2314 | 503.2314            | -0.1           | -1.5 | C <sub>9</sub> H <sub>35</sub> O <sub>10</sub> N <sub>12</sub> S <sub>1</sub> |
|          | 503.2316            | -0.4           | 20.0 | C <sub>31</sub> H <sub>29</sub> O <sub>2</sub> N <sub>5</sub>                 |
|          | 503.2316            | -0.4           | 7.0  | C <sub>16</sub> H <sub>33</sub> O <sub>2</sub> N <sub>13</sub> S <sub>2</sub> |
|          | 503.2316            | -0.4           | 1.5  | C <sub>17</sub> H <sub>39</sub> O <sub>7</sub> N <sub>6</sub> S <sub>2</sub>  |
|          | 503.2311            | 0.5            | 1.0  | C <sub>16</sub> H <sub>41</sub> O <sub>1</sub> N <sub>9</sub> S <sub>4</sub>  |
|          | 503.2311            | 0.6            | 14.0 | C <sub>31</sub> H <sub>37</sub> O <sub>1</sub> N <sub>1</sub> S <sub>2</sub>  |
|          | 503.2318            | -0.8           | 4.5  | C <sub>25</sub> H <sub>43</sub> O <sub>4</sub> S <sub>3</sub>                 |
|          | 503.2310            | 0.9            | -2.0 | C <sub>8</sub> H <sub>37</sub> O <sub>4</sub> N <sub>15</sub> S <sub>3</sub>  |
|          | 503.2309            | 0.9            | 5.5  | C <sub>24</sub> H <sub>39</sub> O <sub>9</sub> S <sub>1</sub>                 |
|          | 503.2309            | 0.9            | 11.0 | C <sub>23</sub> H <sub>33</sub> O <sub>4</sub> N <sub>7</sub> S <sub>1</sub>  |
|          | 503.2307            | 1.3            | 2.5  | C <sub>16</sub> H <sub>35</sub> O <sub>12</sub> N <sub>6</sub>                |
|          | 503.2307            | 1.3            | 8.0  | C <sub>15</sub> H <sub>29</sub> O <sub>7</sub> N <sub>13</sub>                |
|          | 503.2321            | -1.4           | 7.5  | C <sub>17</sub> H <sub>31</sub> O <sub>8</sub> N <sub>10</sub>                |
|          | 503.2321            | -1.4           | 2.0  | C <sub>18</sub> H <sub>37</sub> O <sub>13</sub> N <sub>3</sub>                |
|          | 503.2323            | -1.7           | 16.0 | C <sub>24</sub> H <sub>29</sub> N <sub>11</sub> S <sub>1</sub>                |
|          | 503.2323            | -1.7           | 10.5 | C <sub>25</sub> H <sub>35</sub> O <sub>5</sub> N <sub>4</sub> S <sub>1</sub>  |
|          | 503.2323            | -1.8           | -2.5 | C <sub>10</sub> H <sub>39</sub> O <sub>5</sub> N <sub>12</sub> S <sub>3</sub> |
|          | 503.2305            | 1.9            | 5.0  | C <sub>23</sub> H <sub>41</sub> O <sub>3</sub> N <sub>3</sub> S <sub>3</sub>  |
|          | 503.2325            | -2.2           | 0.5  | C <sub>18</sub> H <sub>43</sub> O <sub>2</sub> N <sub>6</sub> S <sub>4</sub>  |
|          | 503.2303            | 2.2            | 2.0  | C <sub>15</sub> H <sub>37</sub> O <sub>6</sub> N <sub>9</sub> S <sub>2</sub>  |
|          | 503.2302            | 2.3            | 15.0 | C <sub>30</sub> H <sub>33</sub> O <sub>6</sub> N <sub>1</sub>                 |
|          | 503.2302            | 2.3            | 20.5 | C <sub>29</sub> H <sub>27</sub> O <sub>1</sub> N <sub>8</sub>                 |
|          | 503.2301            | 2.6            | -1.0 | C <sub>7</sub> H <sub>33</sub> O <sub>9</sub> N <sub>15</sub> S <sub>1</sub>  |
|          | 503.2328            | -2.7           | -2.0 | C <sub>11</sub> H <sub>37</sub> O <sub>11</sub> N <sub>9</sub> S <sub>1</sub> |
|          | 503.2329            | -3.0           | 19.5 | C <sub>33</sub> H <sub>31</sub> O <sub>3</sub> N <sub>2</sub>                 |
|          | 503.2330            | -3.1           | 6.5  | C <sub>18</sub> H <sub>35</sub> O <sub>3</sub> N <sub>10</sub> S <sub>2</sub> |
|          | 503.2330            | -3.1           | 1.0  | C <sub>19</sub> H <sub>41</sub> O <sub>8</sub> N <sub>3</sub> S <sub>2</sub>  |
|          | 503.2298            | 3.2            | 1.5  | C <sub>14</sub> H <sub>39</sub> N <sub>12</sub> S <sub>4</sub>                |
|          | 503.2298            | 3.2            | 14.5 | C <sub>29</sub> H <sub>35</sub> N <sub>4</sub> S <sub>2</sub>                 |
|          | 503.2331            | -3.4           | 9.5  | C <sub>26</sub> H <sub>39</sub> N <sub>4</sub> S <sub>3</sub>                 |
|          | 503.2296            | 3.6            | 6.0  | C <sub>22</sub> H <sub>37</sub> O <sub>8</sub> N <sub>3</sub> S <sub>1</sub>  |

| Mass | Theoretical<br>Mass | Delta<br>[ppm] | RDB  | Composition                                                                   |
|------|---------------------|----------------|------|-------------------------------------------------------------------------------|
|      | 503.2296            | 3.6            | 11.5 | C <sub>21</sub> H <sub>31</sub> O <sub>3</sub> N <sub>10</sub> S <sub>1</sub> |
|      | 503.2294            | 4.0            | 3.0  | C <sub>14</sub> H <sub>33</sub> O <sub>11</sub> N <sub>9</sub>                |
|      | 503.2334            | -4.0           | 12.5 | C <sub>18</sub> H <sub>27</sub> O <sub>4</sub> N <sub>14</sub>                |
|      | 503.2334            | -4.0           | 7.0  | C <sub>19</sub> H <sub>33</sub> O <sub>9</sub> N <sub>7</sub>                 |
|      | 503.2334            | -4.0           | 1.5  | C <sub>20</sub> H <sub>39</sub> O <sub>14</sub>                               |
|      | 503.2336            | -4.4           | 15.5 | C <sub>26</sub> H <sub>31</sub> O <sub>1</sub> N <sub>8</sub> S <sub>1</sub>  |
|      | 503.2336            | -4.4           | 10.0 | C <sub>27</sub> H <sub>37</sub> O <sub>6</sub> N <sub>1</sub> S <sub>1</sub>  |
|      | 503.2336            | -4.5           | -3.0 | C <sub>12</sub> H <sub>41</sub> O <sub>6</sub> N <sub>9</sub> S <sub>3</sub>  |
|      | 503.2291            | 4.5            | 5.5  | C <sub>21</sub> H <sub>39</sub> O <sub>2</sub> N <sub>6</sub> S <sub>3</sub>  |
|      | 503.2338            | -4.8           | 0.0  | C <sub>20</sub> H <sub>45</sub> O <sub>3</sub> N <sub>3</sub> S <sub>4</sub>  |
|      | 503.2289            | 4.9            | -3.0 | C <sub>14</sub> H <sub>41</sub> O <sub>10</sub> N <sub>5</sub> S <sub>2</sub> |
|      | 503.2289            | 4.9            | 2.5  | C <sub>13</sub> H <sub>35</sub> O <sub>5</sub> N <sub>12</sub> S <sub>2</sub> |
|      | 503.2289            | 5.0            | 15.5 | C <sub>28</sub> H <sub>31</sub> O <sub>5</sub> N <sub>4</sub>                 |
|      | 503.2289            | 5.0            | 21.0 | C <sub>27</sub> H <sub>25</sub> N <sub>11</sub>                               |
