# Supplementary material for: Sidechain structure–activity relationships of cyclobutane-based small molecule αvβ3 antagonists
Source: Royal Society of Chemistry journal article supplement (doi:10.1039/d4md00306c), 2024-01-01
Supplement: d4md00306c3.pdf [file d4md00306c3.pdf]

**Table S1** Cytotoxicity of compounds on the cell lines used in the functional assays (measured by MTT assay). Cells (2000 cells/well for Sk-Mel-2; 1000 cells/well for U87MG) were incubated for 96 hours at 37 °C in a total volume of 200  $\mu\text{L}$ /well (180  $\mu\text{L}$  medium + 20  $\mu\text{L}$  test compound solution). After 96 hours, the medium was replaced by fresh medium containing 0.5 mg/ml (end conc.) MTT per well, incubated for 4 h then the plate processed and read as described in Sutherland et al.<sup>1</sup>

| <b>Compound</b>    | <b>IC<sub>50</sub>/<math>\mu\text{M}</math> Sk-Mel-2</b> | <b>U87MG<br/>IC<sub>50</sub>/<math>\mu\text{M}</math></b> |
|--------------------|----------------------------------------------------------|-----------------------------------------------------------|
| <b>17</b> ICT9097  | > 50                                                     | 70.1 $\pm$ 18.8                                           |
| <b>18</b> ICT 9096 | -                                                        | 59.2 $\pm$ 16.9                                           |
| <b>19</b> ICT 9100 | > 50                                                     | -                                                         |
| <b>20</b> ICT 9093 | > 50                                                     | 37.9 $\pm$ 9.1                                            |
| <b>21</b> ICT 9091 | > 50                                                     | 30.9 $\pm$ 8.1                                            |
| <b>22</b> ICT 9092 | > 50                                                     | 46.4 $\pm$ 3.5                                            |
| <b>23</b> ICT 9101 | > 50                                                     | -                                                         |
| <b>24</b> ICT 9094 | 31.9 $\pm$ 2.0                                           | 46.7 $\pm$ 7.6                                            |
| <b>28</b> ICT 9082 | > 100                                                    | 32.5 $\pm$ 14.1                                           |
| <b>29</b> ICT 9084 | > 50                                                     | 36.2 $\pm$ 12.4                                           |
| <b>30</b> ICT 9081 | > 10                                                     | 160.8 $\pm$ 61.0                                          |
| <b>31</b> ICT 9083 | > 100                                                    | -                                                         |
| <b>32</b> ICT 9085 | 80.0 $\pm$ 19.6                                          | 40.9 $\pm$ 11.5                                           |
| <b>33</b> ICT 9087 | 40.0 $\pm$ 2.0                                           | 35.5 $\pm$ 2.0                                            |
| <b>34</b> ICT 9088 | 97.1 $\pm$ 3.2                                           | 51.3 $\pm$ 1.9                                            |
| <b>35</b> ICT 9089 | 15.2 $\pm$ 5.5                                           | -                                                         |
| <b>37</b> ICT 9098 | > 50                                                     | -                                                         |
| <b>38</b> ICT 9102 | > 50                                                     | -                                                         |
| <b>39</b> ICT 9099 | 35.2 $\pm$ 6.5                                           | -                                                         |
| <b>40</b> ICT 9103 | > 50                                                     | -                                                         |
| <b>53</b> ICT 9072 | 33.5 $\pm$ 8.4                                           | 36.9 $\pm$ 8.0                                            |
| <b>54</b> ICT 9073 | 33.0 $\pm$ 10.5                                          | 18.9 $\pm$ 2.6                                            |
| <b>1</b> ICT9055   | 9.6 $\pm$ 5.7                                            | 36.9 $\pm$ 11.7                                           |
| cRGDfV             | 42.5 $\pm$ 1.8                                           | 69.2 $\pm$ 25.5                                           |

1. M. Sutherland, A. Gordon, F. O. Al-Shammari, A. Throup, A. Cilia La Corte, H. Philippou, S. D. Shnyder, L. H. Patterson and H. M. Sheldrake, *Cancers*, 2023, **15**, 4023.

# Metabolic stability of ICT9055 (1) and its free acid metabolite ICT9064

**A**

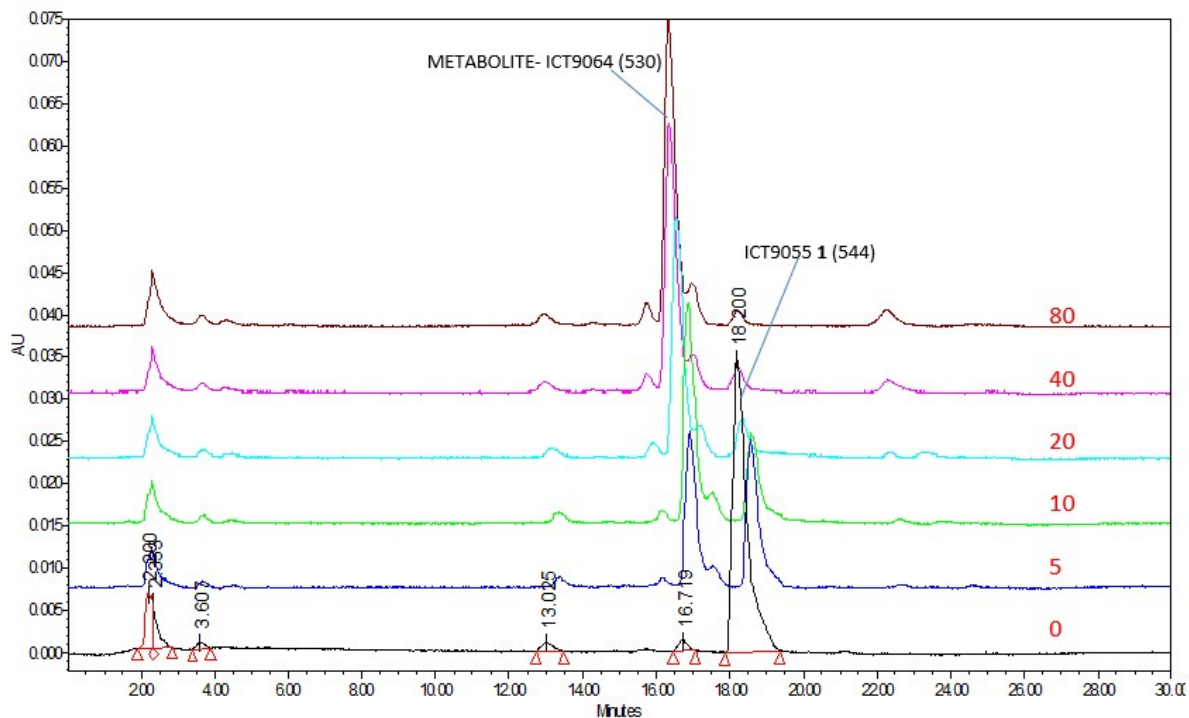

**B**

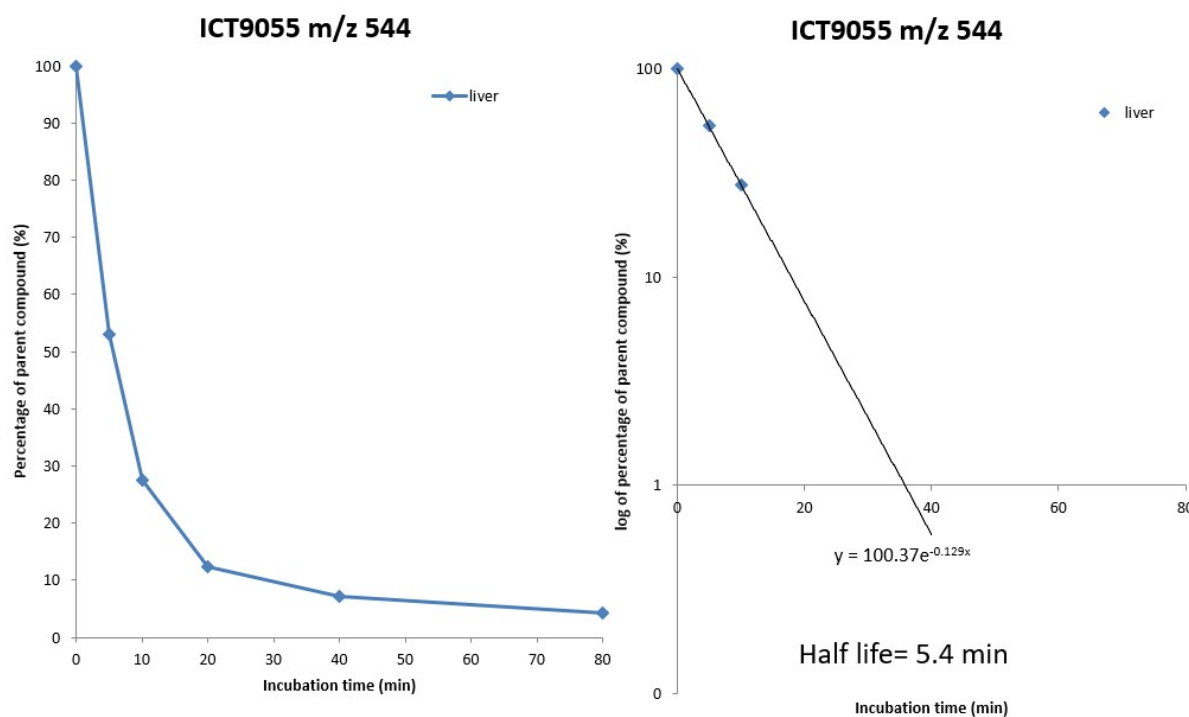

**C**

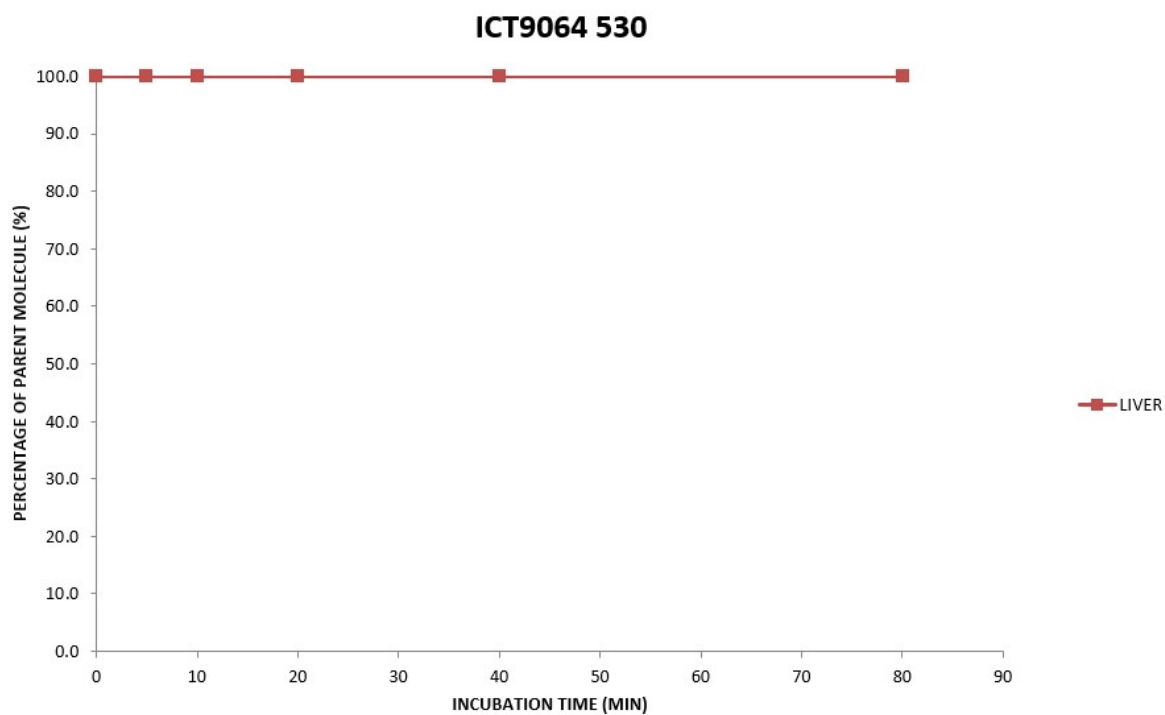

Figure S2: A. Timecourse of conversion of methyl ester **1** (ICT9055) to carboxylic acid (ICT9064) in mouse liver homogenate. B. Determination of half-life of **1** (ICT9055) in mouse liver homogenate. C. The metabolite, carboxylic acid (ICT9064) is highly stable in liver, with a half life of >80 minutes.

**A**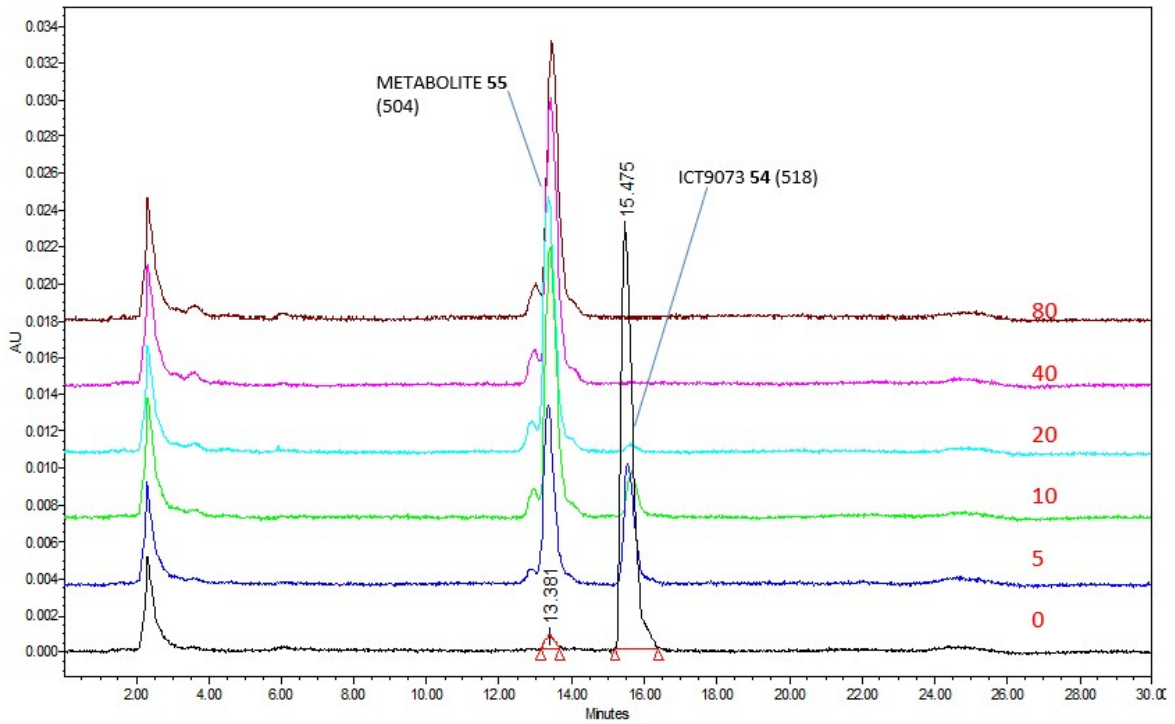**B**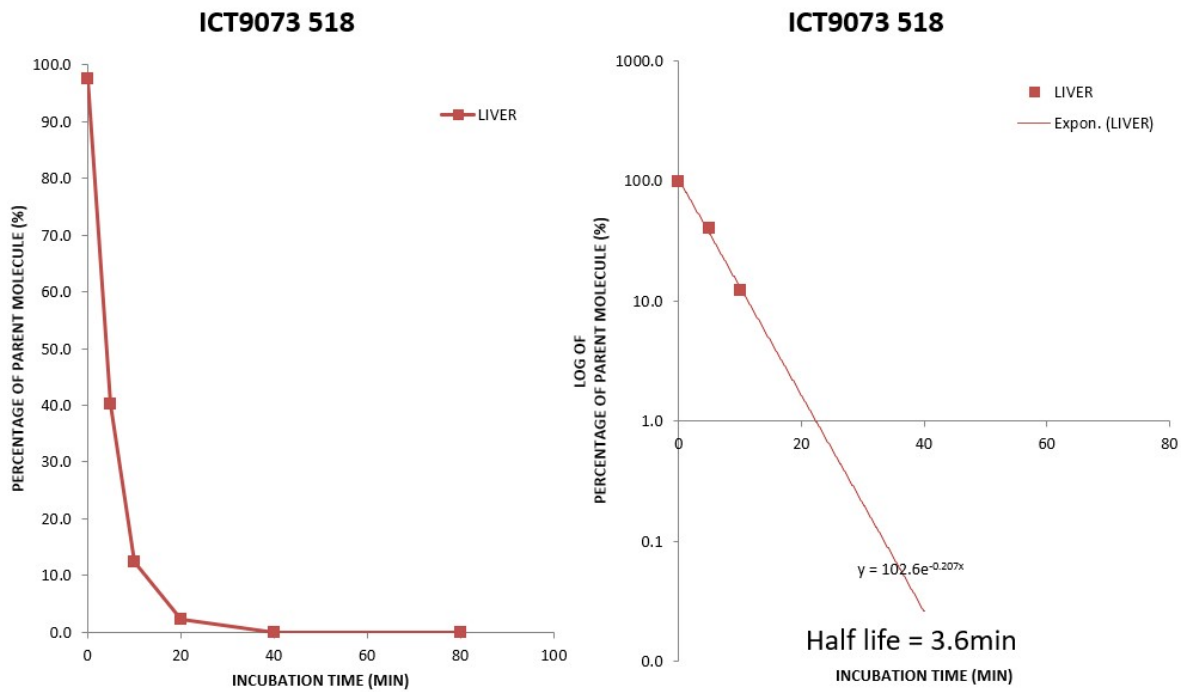

Figure S3. A. Timecourse of conversion of methyl ester **54** (ICT9073) to carboxylic acid **55** in mouse liver homogenate. The metabolite appears to be stable in liver. B. Determination of half-life of **54** in mouse liver homogenate.
